# Supplementary material
Source: PubMed Central journal article supplement (PMC4266741)
Supplement: ejhg201456x3.pdf [file ejhg201456x3.pdf]

## PC1

| SNP         | CHR | BP        | p_plink   | beta_plink | p_emmax   | Annotation                      |
|-------------|-----|-----------|-----------|------------|-----------|---------------------------------|
| rs6910580   | 6   | 110243292 | 4.99E-06  | 0.097      | 0.0000135 | .                               |
| rs528808    | 6   | 100104289 | 0.000006  | 0.1179     | 0.0000153 | .                               |
| rs9329289   | 10  | 2542389   | 6.02E-06  | 0.09988    | 3.45E-06  | .                               |
| rs55655041  | 19  | 30995200  | 7.37E-06  | -0.1336    | 0.0000122 | ZNF536(0)                       |
| rs7816613   | 8   | 102729475 | 7.97E-06  | 0.1378     | 0.0000261 | NCALD(0)                        |
| rs10108888  | 8   | 102731364 | 0.000008  | 0.138      | 0.000026  | NCALD(0)                        |
| rs7786410   | 7   | 55922323  | 0.0000082 | -0.1548    | 0.0000169 | sep/14(0)                       |
| 6:121088770 | 6   | 121088770 | 8.21E-06  | 0.3022     | 0.0000534 | .                               |
| rs551185    | 6   | 100106323 | 0.0000085 | 0.1153     | 0.0000253 | .                               |
| rs1460237   | 8   | 105841855 | 8.76E-06  | -0.452     | 0.0000198 | .                               |
| rs9329290   | 10  | 2542751   | 9.65E-06  | 0.0983     | 5.41E-06  | .                               |
| rs11670915  | 19  | 30985367  | 0.0000099 | -0.1269    | 0.0000135 | ZNF536(0)                       |
| rs11214592  | 11  | 113250473 | 0.0000106 | 0.1718     | 0.0000216 | TTC12(+13.36kb) ANKK1(-8.039kb) |
| rs12461746  | 19  | 30997420  | 0.0000113 | -0.13      | 0.0000154 | ZNF536(0)                       |
| rs7338593   | 13  | 99996854  | 0.0000114 | -0.1263    | 0.0000144 | UBAC2(0)                        |
| 19:30996923 | 19  | 30996923  | 0.0000114 | -0.1297    | 0.0000163 | ZNF536(0)                       |
| rs11801973  | 1   | 33902238  | 0.0000116 | -0.1789    | 0.0000132 | .                               |
| rs330839    | 6   | 100054245 | 0.0000123 | 0.1146     | 0.0000267 | PRDM13(-0.404kb)                |
| 15:27325743 | 15  | 27325743  | 0.0000127 | 0.1165     | 0.000011  | .                               |
| rs28429768  | 8   | 102742393 | 0.000013  | 0.1338     | 0.0000463 | NCALD(0)                        |
| 19:31015585 | 19  | 31015585  | 0.0000146 | -0.1281    | 0.0000197 | ZNF536(0)                       |
| rs2458698   | 10  | 2548452   | 0.0000148 | 0.1031     | 6.65E-06  | .                               |
| rs11671292  | 19  | 31009903  | 0.0000148 | -0.1286    | 0.00002   | ZNF536(0)                       |
| rs2789038   | 6   | 121176072 | 0.0000158 | 0.1984     | 0.0000376 | .                               |
| rs59263523  | 15  | 27313497  | 0.0000159 | 0.1168     | 0.0000138 | .                               |
| rs56992933  | 15  | 27313600  | 0.0000159 | 0.1168     | 0.0000138 | .                               |
| rs56256009  | 19  | 31002182  | 0.0000159 | -0.1281    | 0.0000228 | ZNF536(0)                       |
| 19:31017099 | 19  | 31017099  | 0.0000162 | -0.1271    | 0.0000148 | ZNF536(0)                       |
| 19:31017177 | 19  | 31017177  | 0.0000162 | -0.1271    | 0.0000148 | ZNF536(0)                       |
| rs11084553  | 19  | 31019780  | 0.0000162 | -0.1271    | 0.0000148 | ZNF536(0)                       |
| rs11084554  | 19  | 31019807  | 0.0000162 | -0.1271    | 0.0000148 | ZNF536(0)                       |
| rs6947114   | 7   | 55921028  | 0.0000162 | -0.1474    | 0.0000312 | sep/14(0)                       |
| rs6900672   | 6   | 110239704 | 0.000017  | 0.09035    | 0.0000367 | .                               |
| rs56123858  | 19  | 31002162  | 0.0000171 | -0.1277    | 0.0000244 | ZNF536(0)                       |
| rs649966    | 6   | 100092792 | 0.0000173 | 0.1116     | 0.0000421 | .                               |
| rs11671098  | 19  | 31010075  | 0.0000175 | -0.1271    | 0.0000237 | ZNF536(0)                       |
| rs11668658  | 19  | 31011285  | 0.0000175 | -0.1271    | 0.0000237 | ZNF536(0)                       |
| rs2646850   | 1   | 217583937 | 0.0000176 | 0.08973    | 0.0000107 | GPATCH2(-19.9kb)                |
| rs11669185  | 19  | 31016277  | 0.0000177 | -0.1265    | 0.0000161 | ZNF536(0)                       |
| rs643235    | 6   | 100079031 | 0.0000177 | 0.1112     | 0.000045  | PRDM13(+15.58kb)                |
| rs656608    | 6   | 100086261 | 0.0000178 | 0.1116     | 0.0000425 | .                               |
| 19:31002493 | 19  | 31002493  | 0.0000182 | -0.127     | 0.0000251 | ZNF536(0)                       |
| rs499540    | 6   | 100078332 | 0.0000182 | 0.111      | 0.0000403 | PRDM13(+14.88kb)                |
| rs155041    | 5   | 95969322  | 0.0000183 | 0.08868    | 0.0000474 | .                               |

|              |    |           |           |         |           |                      |
|--------------|----|-----------|-----------|---------|-----------|----------------------|
| 11:113261317 | 11 | 113261317 | 0.0000184 | 0.1654  | 0.0000295 | DRD2(-19kb) ANKK1(0) |
| rs658666     | 6  | 100080204 | 0.0000184 | 0.1109  | 0.0000433 | PRDM13(+16.75kb)     |
| rs672369     | 6  | 100080944 | 0.0000184 | 0.1109  | 0.0000433 | PRDM13(+17.49kb)     |
| rs491397     | 6  | 100082085 | 0.0000184 | 0.1109  | 0.0000433 | PRDM13(+18.63kb)     |
| rs597009     | 6  | 100083583 | 0.0000184 | 0.1109  | 0.0000433 | .                    |
| rs625011     | 6  | 100083808 | 0.0000184 | 0.1109  | 0.0000433 | .                    |
| rs35440297   | 19 | 30993837  | 0.0000186 | -0.1265 | 0.0000256 | ZNF536(0)            |
| rs11667431   | 19 | 30994610  | 0.0000186 | -0.1265 | 0.0000256 | ZNF536(0)            |
| rs11668027   | 19 | 30994847  | 0.0000186 | -0.1265 | 0.0000256 | ZNF536(0)            |
| rs1923890    | 13 | 47357995  | 0.0000188 | -0.1253 | 0.0000179 | ESD(0)               |
| rs12462153   | 19 | 30997903  | 0.0000188 | -0.1265 | 0.0000259 | ZNF536(0)            |
| rs9676942    | 19 | 31007859  | 0.0000188 | -0.1265 | 0.0000259 | ZNF536(0)            |
| 19:31009160  | 19 | 31009160  | 0.0000188 | -0.1265 | 0.0000259 | ZNF536(0)            |
| 19:31009462  | 19 | 31009462  | 0.0000188 | -0.1265 | 0.0000259 | ZNF536(0)            |
| rs4939551    | 18 | 46139548  | 0.0000189 | 0.09008 | 0.000013  | KIAA0427(0)          |
| rs12459057   | 19 | 30996525  | 0.000019  | -0.1264 | 0.0000261 | ZNF536(0)            |
| rs12460937   | 19 | 30999532  | 0.000019  | -0.1264 | 0.0000261 | ZNF536(0)            |
| rs17313879   | 19 | 31000717  | 0.000019  | -0.1264 | 0.0000261 | ZNF536(0)            |
| rs11669833   | 19 | 31005143  | 0.000019  | -0.1264 | 0.0000261 | ZNF536(0)            |
| rs11665844   | 19 | 31005572  | 0.000019  | -0.1264 | 0.0000261 | ZNF536(0)            |
| rs12462361   | 19 | 31006185  | 0.000019  | -0.1264 | 0.0000261 | ZNF536(0)            |
| 19:31006335  | 19 | 31006335  | 0.000019  | -0.1264 | 0.0000261 | ZNF536(0)            |
| 19:31007045  | 19 | 31007045  | 0.000019  | -0.1264 | 0.0000261 | ZNF536(0)            |
| rs34650510   | 19 | 31007182  | 0.000019  | -0.1264 | 0.0000261 | ZNF536(0)            |
| rs9676954    | 19 | 31008054  | 0.000019  | -0.1264 | 0.0000261 | ZNF536(0)            |
| 19:31008464  | 19 | 31008464  | 0.000019  | -0.1264 | 0.0000261 | ZNF536(0)            |
| 19:31009539  | 19 | 31009539  | 0.000019  | -0.1264 | 0.0000261 | ZNF536(0)            |
| rs55735422   | 19 | 31010389  | 0.000019  | -0.1264 | 0.0000261 | ZNF536(0)            |
| 19:31010807  | 19 | 31010807  | 0.000019  | -0.1264 | 0.0000261 | ZNF536(0)            |
| 19:31011117  | 19 | 31011117  | 0.000019  | -0.1264 | 0.0000261 | ZNF536(0)            |
| 19:31011155  | 19 | 31011155  | 0.000019  | -0.1264 | 0.0000261 | ZNF536(0)            |
| rs11672726   | 19 | 31011669  | 0.000019  | -0.1264 | 0.0000261 | ZNF536(0)            |
| rs17313907   | 19 | 31014394  | 0.000019  | -0.1264 | 0.0000261 | ZNF536(0)            |
| 19:31014725  | 19 | 31014725  | 0.000019  | -0.1264 | 0.0000261 | ZNF536(0)            |
| 19:31014780  | 19 | 31014780  | 0.000019  | -0.1264 | 0.0000261 | ZNF536(0)            |
| 6:121140506  | 6  | 121140506 | 0.000019  | 0.2764  | 0.0001154 | .                    |
| rs673245     | 1  | 217581496 | 0.0000191 | 0.09016 | 8.75E-06  | .                    |
| rs11668366   | 19 | 30995175  | 0.0000191 | -0.1267 | 0.0000271 | ZNF536(0)            |
| 19:31009171  | 19 | 31009171  | 0.0000191 | -0.1265 | 0.000025  | ZNF536(0)            |
| rs330842     | 6  | 100058932 | 0.0000191 | 0.111   | 0.0000431 | PRDM13(0)            |
| rs9400345    | 6  | 110242224 | 0.0000192 | 0.09017 | 0.0000431 | .                    |
| 1:171120354  | 1  | 171120354 | 0.0000194 | 0.3097  | 0.0000294 | .                    |
| 1:171120824  | 1  | 171120824 | 0.0000194 | 0.3097  | 0.0000294 | .                    |
| rs61997161   | 1  | 171121206 | 0.0000194 | 0.3097  | 0.0000294 | .                    |
| rs10816554   | 9  | 110441113 | 0.0000194 | -0.1105 | 0.0000293 | .                    |
| rs857615     | 6  | 100074908 | 0.0000195 | 0.1106  | 0.0000442 | PRDM13(+11.45kb)     |
| 19:31012549  | 19 | 31012549  | 0.0000196 | -0.1264 | 0.0000273 | ZNF536(0)            |

|             |    |           |           |          |           |                    |
|-------------|----|-----------|-----------|----------|-----------|--------------------|
| rs6903283   | 6  | 110241653 | 0.0000197 | 0.08956  | 0.0000448 | .                  |
| rs2458702   | 10 | 2544736   | 0.0000198 | 0.1025   | 0.0000105 | .                  |
| rs9386862   | 6  | 110241934 | 0.0000199 | 0.08988  | 0.0000471 | .                  |
| rs2452187   | 10 | 2551147   | 0.0000201 | 0.1022   | 0.0000105 | .                  |
| rs508311    | 6  | 100085378 | 0.0000201 | 0.1108   | 0.0000496 | .                  |
| rs534962    | 6  | 100086200 | 0.0000201 | 0.1108   | 0.0000496 | .                  |
| rs550848    | 6  | 100088268 | 0.0000201 | 0.1108   | 0.0000496 | .                  |
| 19:30990705 | 19 | 30990705  | 0.0000203 | -0.1243  | 0.0000335 | ZNF536(0)          |
| rs11666230  | 19 | 30993444  | 0.0000203 | -0.1259  | 0.000028  | ZNF536(0)          |
| 6:121159540 | 6  | 121159540 | 0.0000206 | 0.2169   | 0.0000796 | .                  |
| 19:31015847 | 19 | 31015847  | 0.0000207 | -0.1257  | 0.0000196 | ZNF536(0)          |
| rs330837    | 6  | 100052699 | 0.0000209 | 0.1135   | 0.0000463 | PRDM13(-1.95kb)    |
| rs35554202  | 7  | 8469068   | 0.0000211 | -0.1714  | 0.0000365 | NXP1(-4.516kb)     |
| rs6975250   | 7  | 8419821   | 0.0000214 | -0.1682  | 0.0000508 | .                  |
| rs10496911  | 2  | 142783437 | 0.0000216 | 0.222    | 0.0000144 | LRP1B(0)           |
| rs55700449  | 19 | 30982165  | 0.000022  | -0.1222  | 0.0000275 | ZNF536(0)          |
| 1:171126965 | 1  | 171126965 | 0.0000226 | 0.3097   | 0.0000318 | .                  |
| 1:171127306 | 1  | 171127306 | 0.0000239 | 0.314    | 0.0000314 | .                  |
| rs59428939  | 15 | 27327707  | 0.0000239 | 0.1095   | 0.000019  | .                  |
| rs693233    | 6  | 100093560 | 0.0000241 | 0.1094   | 0.0000672 | .                  |
| rs532213    | 6  | 100095294 | 0.0000241 | 0.1094   | 0.0000672 | .                  |
| rs623303    | 6  | 100091403 | 0.0000242 | 0.1098   | 0.0000611 | .                  |
| rs7816488   | 8  | 102729403 | 0.0000243 | 0.1289   | 0.0000739 | NCALD(0)           |
| 1:171122829 | 1  | 171122829 | 0.0000244 | 0.3084   | 0.0000344 | .                  |
| 1:171124294 | 1  | 171124294 | 0.0000244 | 0.3084   | 0.0000344 | .                  |
| rs9595531   | 13 | 47350561  | 0.0000246 | -0.1289  | 0.0000295 | ESD(0)             |
| rs12702725  | 7  | 8418980   | 0.0000246 | -0.1666  | 0.0000551 | .                  |
| rs10024768  | 4  | 41605108  | 0.0000254 | -0.113   | 0.0000567 | LIMCH1(0)          |
| 19:31001092 | 19 | 31001092  | 0.0000264 | -0.1266  | 0.0000311 | ZNF536(0)          |
| rs1111961   | 2  | 134880830 | 0.0000264 | -0.1037  | 0.0000337 | .                  |
| rs13111484  | 4  | 184356574 | 0.0000267 | 0.08819  | 0.0000671 | CDKN2AIP(-9.214kb) |
| rs10107483  | 8  | 102745291 | 0.0000269 | 0.1284   | 0.0000878 | NCALD(0)           |
| rs1976715   | 3  | 122864627 | 0.0000271 | -0.08738 | 0.0000143 | PDIA5(0)           |
| 7:8468828   | 7  | 8468828   | 0.0000271 | -0.169   | 0.0000449 | NXP1(-4.756kb)     |
| rs34201834  | 7  | 8434538   | 0.0000274 | -0.1607  | 0.0000504 | .                  |
| rs650484    | 6  | 100099647 | 0.0000277 | 0.1086   | 0.0000766 | .                  |
| rs543274    | 6  | 100099825 | 0.0000277 | 0.1086   | 0.0000766 | .                  |
| rs662554    | 6  | 100100028 | 0.0000277 | 0.1086   | 0.0000766 | .                  |
| rs506683    | 6  | 100101549 | 0.0000277 | 0.1086   | 0.0000766 | .                  |
| rs506521    | 6  | 100101609 | 0.0000277 | 0.1086   | 0.0000766 | .                  |
| rs484413    | 6  | 100101666 | 0.0000277 | 0.1086   | 0.0000766 | .                  |
| rs499487    | 6  | 100104578 | 0.0000277 | 0.1086   | 0.0000766 | .                  |
| rs551119    | 6  | 100106362 | 0.0000277 | 0.1086   | 0.0000766 | .                  |
| rs11762666  | 7  | 8414784   | 0.0000277 | -0.1652  | 0.0000627 | .                  |
| rs2062421   | 2  | 134874719 | 0.0000282 | -0.09473 | 0.0000323 | .                  |
| rs1976716   | 3  | 124347126 | 0.0000286 | -0.08695 | 0.000015  | KALRN(0)           |
| rs10903784  | 10 | 2541943   | 0.0000292 | 0.09268  | 0.0000196 | .                  |

|             |    |           |           |          |           |                                   |
|-------------|----|-----------|-----------|----------|-----------|-----------------------------------|
| rs10928479  | 2  | 134879492 | 0.0000292 | -0.09572 | 0.0000322 | .                                 |
| rs12702724  | 7  | 8414614   | 0.0000295 | -0.1747  | 0.0000705 | .                                 |
| rs7248805   | 19 | 31018491  | 0.0000296 | -0.1058  | 0.0000126 | ZNF536(0)                         |
| rs1102232   | 6  | 100102802 | 0.00003   | 0.1082   | 0.0000828 | .                                 |
| rs334586    | 5  | 31361909  | 0.0000306 | 0.126    | 0.0000328 | .                                 |
| rs2673345   | 3  | 122865136 | 0.000031  | -0.08841 | 0.0000162 | PDIA5(0)                          |
| rs6978852   | 7  | 55899001  | 0.000031  | -0.1345  | 0.0000554 | sep/14(0)                         |
| rs6958506   | 7  | 55899174  | 0.000031  | -0.1345  | 0.0000554 | sep/14(0)                         |
| rs7925747   | 11 | 74350783  | 0.0000313 | -0.1127  | 0.00003   | POLD3(0)                          |
| 18:24939806 | 18 | 24939806  | 0.0000318 | 0.1428   | 0.0000355 | .                                 |
| 18:24939956 | 18 | 24939956  | 0.0000318 | 0.1428   | 0.0000355 | .                                 |
| rs61835719  | 10 | 2543390   | 0.0000329 | 0.09307  | 0.0000178 | .                                 |
| rs28560062  | 8  | 102713240 | 0.0000329 | 0.1279   | 0.0001194 | NCALD(0)                          |
| rs11251072  | 10 | 2183536   | 0.000033  | 0.08706  | 0.0000447 | .                                 |
| rs2236874   | 1  | 171170244 | 0.0000335 | 0.08831  | 0.0000216 | FMO2(0)                           |
| rs7967622   | 12 | 54677980  | 0.0000345 | -0.08785 | 0.0000517 | NFE2(-7.915kb) HNRNPA1(0) CBX5(+) |
| rs8001518   | 13 | 31130894  | 0.0000347 | -0.1433  | 0.000054  | .                                 |
| rs2049922   | 1  | 171202927 | 0.0000348 | 0.08823  | 0.0000197 | FMO1(-14.73kb)                    |
| rs34810428  | 11 | 133384027 | 0.0000349 | 0.1198   | 0.0001512 | OPCML(0)                          |
| 19:30996908 | 19 | 30996908  | 0.0000355 | -0.1264  | 0.000047  | ZNF536(0)                         |
| rs60173602  | 9  | 110440082 | 0.0000365 | -0.1076  | 0.0000518 | .                                 |
| rs857626    | 6  | 100101872 | 0.0000367 | 0.1067   | 0.0001072 | .                                 |
| 19:31017686 | 19 | 31017686  | 0.0000374 | -0.1242  | 0.0000365 | ZNF536(0)                         |
| rs869374    | 9  | 110457258 | 0.0000374 | -0.1153  | 0.0000674 | .                                 |
| 18:24948433 | 18 | 24948433  | 0.0000378 | 0.1481   | 0.0000519 | .                                 |
| rs1924620   | 13 | 29183240  | 0.0000386 | 0.1077   | 0.0000737 | .                                 |
| rs4887525   | 15 | 27329338  | 0.0000389 | 0.09885  | 0.000033  | .                                 |
| rs10862759  | 12 | 84163594  | 0.0000398 | 0.312    | 0.0001222 | .                                 |
| rs2817917   | 6  | 121166530 | 0.0000399 | 0.1877   | 0.0002144 | .                                 |
| 2:207070801 | 2  | 207070801 | 0.0000401 | -0.1842  | 0.0000413 | GPR1(0)                           |
| 15:27319562 | 15 | 27319562  | 0.0000408 | 0.1108   | 0.0000271 | .                                 |
| rs10496378  | 2  | 104602478 | 0.000041  | -0.1236  | 0.0000839 | .                                 |
| rs12702730  | 7  | 8432199   | 0.000041  | -0.1575  | 0.0000763 | .                                 |
| rs10978995  | 9  | 110438418 | 0.000041  | -0.1046  | 0.0000541 | .                                 |
| rs4521632   | 6  | 110238653 | 0.000042  | 0.08807  | 0.0000789 | .                                 |
| 3:47357863  | 3  | 47357863  | 0.0000422 | -0.3165  | 0.0000989 | KLHL18(0)                         |
| 2:104618328 | 2  | 104618328 | 0.0000423 | -0.123   | 0.0000795 | .                                 |
| rs4504505   | 6  | 110234652 | 0.0000438 | 0.08578  | 0.0000848 | .                                 |
| rs676023    | 6  | 100107341 | 0.0000442 | 0.1069   | 0.0001114 | .                                 |
| rs11760740  | 7  | 8433101   | 0.0000443 | -0.1567  | 0.0000833 | .                                 |
| rs10872058  | 6  | 110237910 | 0.0000451 | 0.08551  | 0.0000923 | .                                 |
| rs10872059  | 6  | 110238067 | 0.0000451 | 0.08551  | 0.0000923 | .                                 |
| rs13228740  | 7  | 8398558   | 0.0000454 | -0.1616  | 0.0001114 | .                                 |
| rs6425394   | 1  | 171201909 | 0.0000467 | 0.08632  | 0.0000267 | FMO1(-15.75kb)                    |
| 9:71994043  | 9  | 71994043  | 0.0000467 | -0.3955  | 0.0000748 | C9orf61(0)                        |
| rs61493193  | 1  | 171196059 | 0.0000473 | 0.08628  | 0.0000269 | FMO2(+14.24kb)                    |
| rs1355792   | 3  | 145697193 | 0.0000473 | 0.08586  | 0.0000402 | .                                 |

|              |    |           |           |          |           |                                 |
|--------------|----|-----------|-----------|----------|-----------|---------------------------------|
| 15:27325680  | 15 | 27325680  | 0.0000477 | 0.1055   | 0.0000452 | .                               |
| 15:27325693  | 15 | 27325693  | 0.0000477 | 0.1055   | 0.0000452 | .                               |
| rs4938010    | 11 | 113245566 | 0.0000479 | 0.1353   | 0.0000972 | TTC12(+8.452kb) ANKK1(-12.95kb) |
| rs12702729   | 7  | 8426045   | 0.0000485 | -0.1562  | 0.0000867 | .                               |
| 11:113305502 | 11 | 113305502 | 0.0000487 | 0.1724   | 0.0000439 | DRD2(0)                         |
| rs6703439    | 1  | 171203396 | 0.000049  | 0.08612  | 0.0000277 | FMO1(-14.27kb)                  |
| rs12069067   | 1  | 171204581 | 0.000049  | 0.08612  | 0.0000277 | FMO1(-13.08kb)                  |
| rs7552325    | 1  | 181031934 | 0.0000491 | 0.1181   | 0.0001416 | MR1(+7.301kb)                   |
| rs4504504    | 6  | 110234565 | 0.0000492 | 0.08503  | 0.0001013 | .                               |
| rs7075801    | 10 | 113304785 | 0.0000493 | 0.303    | 0.0001085 | .                               |
| rs676917     | 6  | 100107514 | 0.0000493 | 0.1064   | 0.0001237 | .                               |
| 8:102719916  | 8  | 102719916 | 0.0000498 | 0.1297   | 0.0001389 | NCALD(0)                        |
| rs836870     | 3  | 122860397 | 0.0000502 | -0.08428 | 0.0000265 | PDIA5(0)                        |
| rs10794866   | 10 | 2182864   | 0.0000504 | 0.08401  | 0.0000699 | .                               |
| rs10157270   | 1  | 171192584 | 0.0000505 | 0.08585  | 0.0000299 | FMO2(+10.76kb)                  |
| rs11668301   | 19 | 31016196  | 0.0000505 | -0.1209  | 0.0000448 | ZNF536(0)                       |
| rs10794862   | 10 | 2178130   | 0.0000515 | 0.08414  | 0.000074  | .                               |
| rs11760283   | 7  | 8461622   | 0.0000515 | -0.1545  | 0.000102  | NXPH1(-11.96kb)                 |
| rs28712705   | 11 | 113247738 | 0.0000516 | 0.1351   | 0.0000919 | TTC12(+10.62kb) ANKK1(-10.77kb) |
| rs2673343    | 3  | 122866299 | 0.0000516 | -0.08597 | 0.0000267 | PDIA5(0)                        |
| 9:83479761   | 9  | 83479761  | 0.0000516 | -0.3601  | 0.0000526 | .                               |
| rs60337902   | 8  | 71831458  | 0.0000517 | 0.1514   | 0.0000371 | .                               |
| rs2075990    | 1  | 171177205 | 0.0000525 | 0.08508  | 0.0000299 | FMO2(0)                         |
| rs6920527    | 6  | 110236507 | 0.000053  | 0.08456  | 0.0001109 | .                               |
| rs6685849    | 1  | 33865068  | 0.0000533 | -0.1624  | 0.0000632 | .                               |
| 9:83490532   | 9  | 83490532  | 0.0000533 | -0.3595  | 0.0000544 | .                               |
| 9:83479988   | 9  | 83479988  | 0.0000536 | -0.3593  | 0.0000545 | .                               |
| 9:83486228   | 9  | 83486228  | 0.0000536 | -0.3593  | 0.0000545 | .                               |
| rs4938011    | 11 | 113247232 | 0.0000544 | 0.1345   | 0.0001027 | TTC12(+10.12kb) ANKK1(-11.28kb) |
| rs1427308    | 2  | 126429993 | 0.000055  | -0.1011  | 0.0001101 | .                               |
| rs722661     | 7  | 13911645  | 0.000055  | -0.08512 | 0.000054  | ETV1(-19.21kb)                  |
| rs4945848    | 6  | 110251805 | 0.0000556 | 0.08524  | 0.000082  | .                               |
| rs2789037    | 6  | 121175507 | 0.0000556 | 0.1973   | 0.0001582 | .                               |
| rs10185726   | 2  | 207073034 | 0.0000565 | -0.1794  | 0.0000587 | GPR1(0)                         |
| rs6435335    | 2  | 207075906 | 0.0000565 | -0.1794  | 0.0000587 | GPR1(0)                         |
| rs2052816    | 2  | 126424612 | 0.0000566 | -0.101   | 0.0001083 | .                               |
| rs3917740    | 1  | 169579266 | 0.0000569 | 0.1065   | 0.0000474 | SELP(0)                         |
| rs2075419    | 19 | 30991651  | 0.0000569 | -0.1076  | 0.0000944 | ZNF536(0)                       |
| 4:157359488  | 4  | 157359488 | 0.0000572 | -0.0847  | 0.0001185 | .                               |
| rs2223228    | 1  | 171163812 | 0.0000578 | 0.0864   | 0.0000324 | FMO2(0)                         |
| rs11921441   | 3  | 145696166 | 0.0000578 | -0.08768 | 0.0000794 | .                               |
| rs10935597   | 3  | 145696564 | 0.0000578 | -0.08768 | 0.0000794 | .                               |
| rs9651763    | 11 | 74365739  | 0.0000581 | -0.1117  | 0.0000499 | POLD3(+11.97kb)                 |
| rs1914099    | 10 | 113308151 | 0.0000582 | 0.2579   | 0.0001333 | .                               |
| rs1914098    | 10 | 113308152 | 0.0000582 | 0.2579   | 0.0001333 | .                               |
| 10:113308952 | 10 | 113308952 | 0.0000582 | 0.2579   | 0.0001333 | .                               |
| rs6815418    | 4  | 54416496  | 0.0000588 | -0.1007  | 0.0000471 | LNK1(0)                         |

|             |    |           |           |          |           |                                   |
|-------------|----|-----------|-----------|----------|-----------|-----------------------------------|
| rs3786800   | 19 | 30990700  | 0.0000589 | -0.1048  | 0.0000714 | ZNF536(0)                         |
| rs11758549  | 6  | 100184485 | 0.000059  | 0.1037   | 0.0001485 | .                                 |
| rs12617543  | 2  | 134866574 | 0.0000594 | -0.0894  | 0.0000619 | .                                 |
| rs4916191   | 1  | 171218287 | 0.0000597 | 0.0855   | 0.0000335 | FMO1(0)                           |
| rs1896264   | 2  | 126432373 | 0.0000597 | -0.101   | 0.0001119 | .                                 |
| rs4620755   | 11 | 113309619 | 0.0000605 | 0.1357   | 0.0000743 | DRD2(0)                           |
| rs1538615   | 14 | 51413424  | 0.0000609 | 0.0883   | 0.0000649 | PYGL(+2.19kb)                     |
| rs8739      | 3  | 122864436 | 0.0000611 | -0.08433 | 0.0000305 | PDIA5(0)                          |
| rs10281686  | 7  | 55904039  | 0.0000614 | -0.1291  | 0.0001087 | sep/14(0)                         |
| rs2318331   | 8  | 139859313 | 0.0000614 | 0.08658  | 0.0001448 | COL22A1(0)                        |
| rs7524635   | 1  | 171208666 | 0.0000617 | 0.08522  | 0.0000359 | FMO1(-8.996kb)                    |
| rs7179336   | 15 | 27328278  | 0.0000617 | 0.09753  | 0.0000513 | .                                 |
| rs1969262   | 3  | 122863027 | 0.0000618 | -0.0833  | 0.0000318 | PDIA5(0)                          |
| 21:46256823 | 21 | 46256823  | 0.000062  | 0.3647   | 0.0000488 | SUMO3(+18.78kb) PTTG1IP(-12.69kb) |
| rs10912598  | 1  | 171190112 | 0.0000622 | 0.1053   | 0.0000637 | FMO2(+8.29kb)                     |
| rs1124492   | 11 | 113282275 | 0.0000626 | 0.1397   | 0.0000663 | DRD2(0) ANKK1(+11.13kb)           |
| rs7174476   | 15 | 27328201  | 0.0000632 | 0.09617  | 0.0000515 | .                                 |
| rs7166879   | 15 | 27328421  | 0.0000632 | 0.09617  | 0.0000515 | .                                 |
| rs2205728   | 1  | 171209272 | 0.0000638 | 0.08495  | 0.0000382 | FMO1(-8.39kb)                     |
| rs11829252  | 12 | 54684955  | 0.0000645 | -0.08576 | 0.0000889 | NFE2(-0.94kb) HNRNPA1(+5.925kb)   |
| rs10194795  | 2  | 134873270 | 0.0000646 | -0.09041 | 0.0000779 | .                                 |
| rs1039472   | 3  | 145695354 | 0.0000649 | 0.08469  | 0.0000617 | .                                 |
| 15:27326063 | 15 | 27326063  | 0.0000651 | 0.102    | 0.0000548 | .                                 |
| rs4887526   | 15 | 27329615  | 0.0000659 | 0.09591  | 0.000054  | .                                 |
| rs2291799   | 12 | 59307446  | 0.0000661 | 0.1541   | 0.0000943 | LRIG3(0)                          |
| rs1039473   | 3  | 145695146 | 0.0000661 | -0.08687 | 0.000096  | .                                 |
| rs10899769  | 7  | 55920605  | 0.0000661 | -0.1282  | 0.0001024 | sep/14(0)                         |
| rs4887552   | 15 | 27326562  | 0.0000665 | 0.102    | 0.0000569 | .                                 |
| rs650783    | 6  | 100125119 | 0.0000668 | 0.1039   | 0.0001345 | .                                 |
| rs4424703   | 11 | 113353185 | 0.000067  | 0.1772   | 0.0000881 | DRD2(+7.184kb)                    |
| 6:121136624 | 6  | 121136624 | 0.000067  | 0.2379   | 0.00028   | .                                 |
| 6:121140571 | 6  | 121140571 | 0.000067  | 0.2379   | 0.00028   | .                                 |
| rs6510164   | 19 | 31027333  | 0.0000671 | -0.09663 | 0.0000246 | ZNF536(0)                         |
| rs11758519  | 6  | 100184337 | 0.0000677 | 0.1028   | 0.0001703 | .                                 |
| rs10260994  | 7  | 55919166  | 0.0000682 | -0.1274  | 0.0001017 | sep/14(0)                         |
| rs7567071   | 2  | 134866840 | 0.0000683 | -0.08786 | 0.0000716 | .                                 |
| rs7643935   | 3  | 145699162 | 0.0000683 | 0.08453  | 0.0000579 | .                                 |
| rs10781131  | 9  | 75829027  | 0.0000683 | -0.1126  | 0.0002613 | .                                 |
| 2:207064049 | 2  | 207064049 | 0.0000685 | -0.1795  | 0.0000587 | GPR1(0)                           |
| 2:207065087 | 2  | 207065087 | 0.0000691 | -0.1794  | 0.0000593 | GPR1(0)                           |
| rs7691023   | 4  | 157354502 | 0.0000692 | -0.084   | 0.00014   | .                                 |
| rs7662381   | 4  | 157362471 | 0.0000699 | -0.0839  | 0.0001374 | .                                 |
| rs1879020   | 2  | 134871884 | 0.0000702 | -0.08831 | 0.0000881 | .                                 |
| rs1080598   | 8  | 102744049 | 0.000071  | 0.1205   | 0.0002143 | NCALD(0)                          |
| rs2789034   | 6  | 121172873 | 0.0000711 | 0.1782   | 0.0001708 | .                                 |
| rs2205723   | 1  | 171168302 | 0.0000714 | 0.08416  | 0.0000405 | FMO2(0)                           |
| rs4887551   | 15 | 27326362  | 0.0000718 | 0.1032   | 0.0000563 | .                                 |

|              |    |           |           |          |           |                                 |
|--------------|----|-----------|-----------|----------|-----------|---------------------------------|
| rs3786799    | 19 | 30990770  | 0.0000718 | -0.1032  | 0.0000892 | ZNF536(0)                       |
| 15:27326395  | 15 | 27326395  | 0.0000721 | 0.1032   | 0.0000579 | .                               |
| rs2445922    | 8  | 119133623 | 0.0000722 | -0.1141  | 0.000146  | EXT1(+9.565kb)                  |
| rs3740076    | 10 | 101502968 | 0.0000724 | -0.1339  | 0.0000364 | CUTC(0) COX15(+10.54kb)         |
| rs12671614   | 7  | 55916837  | 0.0000728 | -0.1268  | 0.0001098 | sep/14(0)                       |
| rs2075987    | 1  | 171168804 | 0.0000734 | 0.08397  | 0.0000431 | FMO2(0)                         |
| 2:207059053  | 2  | 207059053 | 0.0000736 | -0.1788  | 0.0000623 | GPR1(0)                         |
| rs16838056   | 2  | 207063279 | 0.0000736 | -0.1788  | 0.0000623 | GPR1(0)                         |
| rs10891541   | 11 | 113252147 | 0.0000738 | 0.1311   | 0.0001424 | TTC12(+15.03kb) ANKK1(-6.365kb) |
| rs11728944   | 4  | 35679146  | 0.0000743 | -0.1405  | 0.0001401 | .                               |
| rs251998     | 7  | 13903609  | 0.000075  | -0.08448 | 0.0000942 | .                               |
| 19:31026554  | 19 | 31026554  | 0.0000753 | -0.1124  | 0.0000526 | ZNF536(0)                       |
| 6:101557262  | 6  | 101557262 | 0.0000753 | 0.1381   | 0.0001655 | .                               |
| rs17671724   | 15 | 27327550  | 0.0000756 | 0.1011   | 0.0000639 | .                               |
| rs2020861    | 1  | 171168585 | 0.0000757 | 0.08382  | 0.0000445 | FMO2(0)                         |
| rs2179105    | 1  | 171176056 | 0.0000758 | 0.08345  | 0.0000413 | FMO2(0)                         |
| rs12285457   | 11 | 113243378 | 0.0000758 | 0.131    | 0.0001506 | TTC12(+6.264kb) ANKK1(-15.13kb) |
| rs2010572    | 2  | 207063825 | 0.0000759 | -0.1785  | 0.0000628 | GPR1(0)                         |
| rs4916192    | 1  | 171218366 | 0.0000765 | 0.08438  | 0.0000421 | FMO1(0)                         |
| rs11790667   | 9  | 110419649 | 0.0000766 | -0.1108  | 0.0000674 | .                               |
| rs61492892   | 11 | 113262554 | 0.0000767 | 0.1276   | 0.0000903 | DRD2(-17.76kb) ANKK1(0)         |
| rs12224538   | 11 | 113263198 | 0.0000767 | 0.1276   | 0.0000903 | DRD2(-17.12kb) ANKK1(0)         |
| rs7062331    | 1  | 171080957 | 0.0000768 | 0.2892   | 0.0001113 | FMO3(0)                         |
| rs4887555    | 15 | 27326758  | 0.0000768 | 0.1056   | 0.0000487 | .                               |
| rs1893362    | 11 | 74357437  | 0.000077  | -0.106   | 0.0000601 | POLD3(+3.672kb)                 |
| rs10151605   | 14 | 73883817  | 0.000077  | -0.107   | 0.0001852 | NUMB(0)                         |
| rs2053079    | 19 | 30987423  | 0.0000773 | -0.09722 | 0.0000599 | ZNF536(0)                       |
| rs2064078    | 1  | 171217181 | 0.0000777 | 0.08411  | 0.0000469 | FMO1(-0.481kb)                  |
| 11:113299273 | 11 | 113299273 | 0.0000777 | 0.1693   | 0.0000796 | DRD2(0)                         |
| rs1055076    | 11 | 113239709 | 0.000078  | 0.1299   | 0.0001585 | TTC12(+2.595kb) ANKK1(-18.8kb)  |
| rs11081348   | 18 | 7962084   | 0.0000781 | 0.09169  | 0.000054  | PTPRM(0)                        |
| rs6699803    | 1  | 171169451 | 0.0000784 | 0.08352  | 0.000048  | FMO2(0)                         |
| rs6692260    | 1  | 171169502 | 0.0000784 | 0.08352  | 0.000048  | FMO2(0)                         |
| rs28538053   | 7  | 130941397 | 0.0000784 | 0.1369   | 0.0000133 | .                               |
| 6:121126178  | 6  | 121126178 | 0.0000786 | 0.2332   | 0.0002935 | .                               |
| 6:121129407  | 6  | 121129407 | 0.0000786 | 0.2332   | 0.0002935 | .                               |
| rs1398781    | 3  | 145689070 | 0.0000788 | 0.08404  | 0.0000835 | .                               |
| rs645121     | 9  | 12852488  | 0.0000788 | -0.08925 | 0.0000643 | .                               |
| rs689158     | 6  | 100107951 | 0.000079  | 0.1037   | 0.0001871 | .                               |
| rs10891542   | 11 | 113253915 | 0.0000798 | 0.1284   | 0.0001126 | TTC12(+16.8kb) ANKK1(-4.597kb)  |
| rs2889395    | 15 | 27314399  | 0.0000798 | 0.105    | 0.000075  | .                               |
| rs2817966    | 6  | 121178151 | 0.0000801 | 0.1775   | 0.000165  | .                               |
| rs1592376    | 7  | 126891392 | 0.0000801 | -0.11    | 0.0001347 | GRM8(0)                         |
| rs10173558   | 2  | 208133995 | 0.0000803 | -0.1211  | 0.0000519 | .                               |
| rs4590907    | 11 | 113263370 | 0.0000804 | 0.1273   | 0.000097  | DRD2(-16.95kb) ANKK1(0)         |
| rs6960402    | 7  | 8462085   | 0.0000809 | -0.1458  | 0.0002019 | NXP1(-11.5kb)                   |
| rs12620600   | 2  | 126421863 | 0.0000812 | -0.09904 | 0.0001501 | .                               |

|             |    |           |           |          |           |                 |
|-------------|----|-----------|-----------|----------|-----------|-----------------|
| 8:13645221  | 8  | 13645221  | 0.0000819 | 0.2276   | 0.0000594 | .               |
| rs12656334  | 5  | 39860893  | 0.000082  | -0.1112  | 0.0001018 | .               |
| rs10277978  | 7  | 55903386  | 0.0000821 | -0.1272  | 0.0001441 | sep/14(0)       |
| rs2280120   | 4  | 54415669  | 0.0000822 | -0.09962 | 0.0000564 | LNx1(0)         |
| rs10223916  | 7  | 55890162  | 0.0000825 | -0.1267  | 0.000142  | sep/14(0)       |
| rs755383    | 9  | 863635    | 0.000083  | 0.08302  | 0.0000934 | DMRT1(0)        |
| rs1879018   | 2  | 134872561 | 0.0000831 | -0.08629 | 0.0000798 | .               |
| rs1864797   | 15 | 27318434  | 0.0000832 | 0.1022   | 0.0000693 | .               |
| rs7029376   | 9  | 110419935 | 0.0000836 | -0.112   | 0.0000724 | .               |
| rs11155041  | 6  | 100194679 | 0.0000837 | 0.102    | 0.0001958 | .               |
| rs17137620  | 15 | 27320424  | 0.000084  | 0.1031   | 0.0000816 | .               |
| rs451781    | 5  | 31371932  | 0.0000842 | 0.1149   | 0.0000782 | .               |
| rs56190064  | 2  | 134870498 | 0.0000845 | -0.08626 | 0.0000823 | .               |
| rs9551503   | 13 | 29183134  | 0.0000846 | 0.09857  | 0.0001972 | .               |
| rs598909    | 6  | 100109592 | 0.0000848 | 0.1033   | 0.0002002 | .               |
| rs12078953  | 1  | 171212646 | 0.0000849 | 0.08363  | 0.0000492 | FMO1(-5.016kb)  |
| rs614414    | 6  | 100110728 | 0.000085  | 0.1032   | 0.0002003 | .               |
| rs628428    | 6  | 100111594 | 0.000085  | 0.1032   | 0.0002003 | .               |
| rs563906    | 6  | 100111975 | 0.000085  | 0.1032   | 0.0002003 | .               |
| rs857628    | 6  | 100109291 | 0.0000851 | 0.1031   | 0.0002137 | .               |
| rs17548854  | 5  | 151901555 | 0.0000854 | -0.09701 | 0.0000872 | .               |
| rs11687330  | 2  | 208139887 | 0.0000856 | -0.1184  | 0.000054  | .               |
| rs1513418   | 3  | 145698695 | 0.0000857 | -0.08547 | 0.0001178 | .               |
| rs7669661   | 4  | 157363739 | 0.0000857 | -0.08305 | 0.0001701 | .               |
| rs9551502   | 13 | 29182290  | 0.0000861 | 0.09832  | 0.0001955 | .               |
| rs10200989  | 2  | 134867672 | 0.0000865 | -0.08604 | 0.0000857 | .               |
| rs4348440   | 7  | 49639431  | 0.0000869 | -0.08535 | 0.0000954 | .               |
| rs4905470   | 14 | 96693211  | 0.000087  | 0.108    | 0.0003192 | BDKRB2(0)       |
| rs56127002  | 19 | 31023802  | 0.0000872 | -0.1117  | 0.0000621 | ZNF536(0)       |
| rs17115583  | 11 | 113308902 | 0.0000876 | 0.1326   | 0.0001097 | DRD2(0)         |
| rs4887550   | 15 | 27325213  | 0.0000876 | 0.101    | 0.0000748 | .               |
| rs881299    | 8  | 38332249  | 0.0000882 | 0.08315  | 0.0001301 | FGFR1(+5.897kb) |
| rs2075991   | 1  | 171177273 | 0.0000885 | 0.08427  | 0.0000472 | FMO2(0)         |
| rs17648205  | 15 | 27327352  | 0.0000885 | 0.1002   | 0.0000739 | .               |
| rs6949908   | 7  | 36603755  | 0.0000885 | 0.143    | 0.000158  | AOAH(0)         |
| rs12344177  | 9  | 110421125 | 0.0000889 | -0.1099  | 0.000077  | .               |
| rs12344248  | 9  | 110421151 | 0.0000889 | -0.1099  | 0.000077  | .               |
| rs58205571  | 15 | 27331759  | 0.0000892 | 0.09522  | 0.0000826 | .               |
| rs12208252  | 6  | 100195051 | 0.0000903 | 0.1017   | 0.0002057 | .               |
| 6:101407609 | 6  | 101407609 | 0.0000903 | 0.1436   | 0.0001408 | .               |
| 6:100123947 | 6  | 100123947 | 0.0000908 | 0.1034   | 0.0002425 | .               |
| rs482799    | 6  | 100127108 | 0.0000909 | 0.1042   | 0.0002373 | .               |
| rs7338920   | 13 | 31130339  | 0.0000915 | -0.1331  | 0.0001183 | .               |
| rs9498518   | 6  | 101560344 | 0.0000915 | 0.1341   | 0.0002265 | .               |
| rs10193163  | 2  | 79352537  | 0.0000918 | -0.08096 | 0.0000992 | REG1A(+1.992kb) |
| rs12510706  | 4  | 80661930  | 0.0000921 | -0.08867 | 0.0001423 | .               |
| rs10912529  | 1  | 171160925 | 0.0000934 | 0.08277  | 0.0000537 | FMO2(0)         |



|             |    |           |           |          |           |                                |
|-------------|----|-----------|-----------|----------|-----------|--------------------------------|
| rs12567956  | 1  | 171161072 | 0.0000934 | 0.08277  | 0.0000537 | FMO2(0)                        |
| rs7529080   | 1  | 171205078 | 0.0000936 | 0.0832   | 0.0000477 | FMO1(-12.58kb)                 |
| 5:164357804 | 5  | 164357804 | 0.0000937 | 0.3051   | 0.0000577 | .                              |
| rs881301    | 8  | 38332318  | 0.0000938 | 0.08297  | 0.0001395 | FGFR1(+5.966kb)                |
| rs6133317   | 20 | 6426137   | 0.0000941 | 0.08223  | 0.0000514 | .                              |
| rs1565788   | 9  | 586686    | 0.0000941 | 0.09384  | 0.0001595 | KANK1(0)                       |
| rs2206720   | 6  | 100169292 | 0.0000945 | 0.1011   | 0.0002705 | .                              |
| rs2206721   | 6  | 100170326 | 0.0000945 | 0.1011   | 0.0002705 | .                              |
| rs484901    | 9  | 12846345  | 0.0000947 | -0.0882  | 0.0000961 | .                              |
| rs4887556   | 15 | 27327092  | 0.0000949 | 0.09985  | 0.0000789 | .                              |
| 1:158638675 | 1  | 158638675 | 0.000095  | -0.1826  | 0.0002042 | SPTA1(0)                       |
| rs13222063  | 7  | 126887314 | 0.0000953 | -0.1196  | 0.0001278 | GRM8(0)                        |
| rs12706772  | 7  | 126887802 | 0.0000953 | -0.1196  | 0.0001278 | GRM8(0)                        |
| rs10773594  | 12 | 129559557 | 0.0000954 | -0.08791 | 0.0000586 | TMEM132D(0)                    |
| rs10783927  | 12 | 59307636  | 0.0000957 | 0.1512   | 0.0001431 | LRIG3(0)                       |
| rs11888896  | 2  | 134879670 | 0.0000959 | -0.09582 | 0.0001097 | .                              |
| rs17863255  | 7  | 126889071 | 0.0000962 | -0.1195  | 0.0001269 | GRM8(0)                        |
| rs13440356  | 9  | 110419280 | 0.000097  | -0.1096  | 0.0000844 | .                              |
| rs55723308  | 19 | 31024755  | 0.0000971 | -0.1122  | 0.0000648 | ZNF536(0)                      |
| rs10228722  | 7  | 126887847 | 0.0000971 | -0.119   | 0.0001501 | GRM8(0)                        |
| rs10485225  | 6  | 100206168 | 0.0000973 | 0.1009   | 0.0002129 | .                              |
| rs4346953   | 7  | 49638898  | 0.000098  | -0.08493 | 0.0000908 | .                              |
| 15:27325562 | 15 | 27325562  | 0.0000997 | 0.1021   | 0.0000862 | .                              |
| rs10258076  | 7  | 126887735 | 0.0000997 | -0.1193  | 0.0001369 | GRM8(0)                        |
| rs12706770  | 7  | 126886089 | 0.0000998 | -0.1195  | 0.0001383 | GRM8(0)                        |
| rs11947786  | 4  | 157352927 | 0.0000999 | -0.0826  | 0.0001824 | .                              |
| rs7993985   | 13 | 20343467  | 0.0001002 | -0.1249  | 0.0001622 | PSPC1(0)                       |
| rs7797094   | 7  | 126890069 | 0.0001006 | -0.1192  | 0.0001337 | GRM8(0)                        |
| rs252000    | 7  | 13903309  | 0.0001017 | -0.0831  | 0.0001228 | .                              |
| rs1222208   | 11 | 30361377  | 0.0001018 | -0.09673 | 0.0000868 | C11orf46(+2.212kb)             |
| 21:46257042 | 21 | 46257042  | 0.0001018 | 0.3496   | 0.00008   | SUMO3(+19kb) PTTG1IP(-12.47kb) |
| 1:171211207 | 1  | 171211207 | 0.0001024 | 0.2468   | 0.0000897 | FMO1(-6.455kb)                 |
| rs56306980  | 13 | 100048286 | 0.0001027 | -0.1168  | 0.000148  | UBAC2(+9.605kb)                |
| rs11788158  | 9  | 110445045 | 0.0001027 | -0.1051  | 0.0001769 | .                              |
| rs12215309  | 6  | 100216540 | 0.0001029 | 0.1052   | 0.000226  | .                              |
| rs9508796   | 13 | 31130245  | 0.000103  | -0.1313  | 0.0001297 | .                              |
| rs330831    | 6  | 100047669 | 0.000103  | 0.1028   | 0.0001216 | PRDM13(-6.98kb)                |
| rs10882950  | 10 | 99278269  | 0.0001031 | -0.08371 | 0.0001168 | UBTD1(0) MMS19(+19.9kb)        |
| rs17344985  | 2  | 104596705 | 0.0001031 | -0.1156  | 0.000166  | .                              |
| rs330827    | 6  | 100044745 | 0.0001031 | 0.1021   | 0.0001241 | PRDM13(-9.904kb)               |
| rs12187722  | 5  | 88955933  | 0.0001033 | 0.1759   | 0.0001924 | .                              |
| 1:171082648 | 1  | 171082648 | 0.0001039 | 0.2885   | 0.0001528 | FMO3(0)                        |
| 21:46258475 | 21 | 46258475  | 0.0001039 | 0.3489   | 0.000083  | PTTG1IP(-11.04kb)              |
| rs1907103   | 4  | 157363631 | 0.0001047 | -0.08212 | 0.000208  | .                              |
| rs12730305  | 1  | 171162879 | 0.0001049 | 0.08223  | 0.0000611 | FMO2(0)                        |
| rs56393443  | 13 | 100048966 | 0.0001049 | -0.1167  | 0.0001509 | UBAC2(+10.29kb)                |
| rs2654857   | 1  | 242670317 | 0.0001053 | -0.1014  | 0.0001232 | PLD5(0)                        |

|             |    |           |           |          |           |                           |
|-------------|----|-----------|-----------|----------|-----------|---------------------------|
| rs17416904  | 2  | 104598569 | 0.0001053 | -0.1146  | 0.0001576 | .                         |
| rs7956184   | 12 | 129624648 | 0.0001059 | -0.09471 | 0.0001574 | TMEM132D(0)               |
| rs7332967   | 13 | 20290379  | 0.0001076 | -0.1014  | 0.0002817 | PSPC1(0)                  |
| rs576208    | 5  | 39843144  | 0.000108  | -0.1095  | 0.0001312 | .                         |
| rs1432127   | 15 | 27322364  | 0.0001081 | 0.102    | 0.0001054 | .                         |
| rs11155055  | 6  | 100208996 | 0.0001081 | 0.1001   | 0.0002464 | .                         |
| rs58180185  | 18 | 40180975  | 0.0001082 | -0.1094  | 0.0001433 | .                         |
| rs1513415   | 3  | 145686565 | 0.0001083 | 0.08199  | 0.0001094 | .                         |
| rs4833618   | 4  | 120309500 | 0.0001083 | -0.08175 | 0.0003393 | .                         |
| 5:39868198  | 5  | 39868198  | 0.0001085 | -0.1091  | 0.0001339 | .                         |
| rs11737362  | 4  | 157359142 | 0.0001087 | -0.0814  | 0.0002225 | .                         |
| rs1418479   | 1  | 240932039 | 0.0001089 | 0.09896  | 0.0001077 | RGS7(-6.777kb)            |
| 9:83462236  | 9  | 83462236  | 0.000109  | -0.3529  | 0.0001148 | .                         |
| 9:83463759  | 9  | 83463759  | 0.000109  | -0.3529  | 0.0001148 | .                         |
| rs330828    | 6  | 100045149 | 0.0001093 | 0.1018   | 0.0001311 | PRDM13(-9.5kb)            |
| rs6001123   | 22 | 22505022  | 0.0001094 | 0.1274   | 0.0001355 | .                         |
| rs1536962   | 9  | 116711690 | 0.0001094 | 0.08114  | 0.0002787 | ZNF618(0)                 |
| rs10145126  | 14 | 96693883  | 0.0001096 | 0.1075   | 0.0003794 | BDKRB2(0)                 |
| rs4563837   | 7  | 49643241  | 0.0001096 | -0.08401 | 0.0001271 | .                         |
| rs4398665   | 5  | 88944444  | 0.00011   | 0.1754   | 0.0002028 | .                         |
| 5:88957123  | 5  | 88957123  | 0.0001104 | 0.1748   | 0.0001975 | .                         |
| rs12202281  | 6  | 99903305  | 0.0001104 | 0.1053   | 0.0001373 | USP45(0)                  |
| rs4370483   | 7  | 49639402  | 0.0001108 | -0.08476 | 0.0001356 | .                         |
| rs4916759   | 5  | 88917291  | 0.000111  | 0.1747   | 0.0002047 | .                         |
| rs4916760   | 5  | 88917310  | 0.000111  | 0.1747   | 0.0002047 | .                         |
| rs6869361   | 5  | 88918060  | 0.000111  | 0.1747   | 0.0002047 | .                         |
| rs3811306   | 14 | 22534497  | 0.0001113 | -0.08088 | 0.0002077 | .                         |
| rs11869505  | 17 | 5412654   | 0.0001113 | 0.3825   | 0.0001047 | NLRP1(0) MIS12(+18.52kb)  |
| rs3734351   | 6  | 101307131 | 0.0001113 | 0.1861   | 0.0002278 | ASCC3(0)                  |
| rs10914706  | 1  | 33886888  | 0.0001116 | -0.145   | 0.0001031 | .                         |
| rs330823    | 6  | 100043043 | 0.0001119 | 0.1018   | 0.0001687 | PRDM13(-11.61kb)          |
| rs28523597  | 18 | 47999209  | 0.0001122 | -0.1876  | 0.000183  | .                         |
| rs563088    | 6  | 100128073 | 0.0001122 | 0.1006   | 0.000304  | .                         |
| 1:171087706 | 1  | 171087706 | 0.0001126 | 0.2845   | 0.0001644 | FMO3(+0.747kb)            |
| 1:171088703 | 1  | 171088703 | 0.0001127 | 0.2845   | 0.0001642 | FMO3(+1.744kb)            |
| 1:171090910 | 1  | 171090910 | 0.0001127 | 0.2845   | 0.0001642 | FMO3(+3.951kb)            |
| rs10912542  | 1  | 171167157 | 0.0001127 | 0.08196  | 0.000067  | FMO2(0)                   |
| rs6656759   | 1  | 29175846  | 0.0001127 | 0.1638   | 0.0000907 | OPRD1(0)                  |
| rs10830045  | 10 | 129225930 | 0.0001128 | 0.09199  | 0.000141  | .                         |
| rs8036266   | 15 | 27317712  | 0.0001128 | 0.1016   | 0.000098  | .                         |
| rs7026176   | 9  | 116670743 | 0.0001131 | 0.0811   | 0.0003191 | ZNF618(0)                 |
| rs4738077   | 8  | 71126538  | 0.0001133 | 0.09141  | 0.0001499 | NCOA2(0)                  |
| rs7245967   | 19 | 17011485  | 0.0001135 | 0.08595  | 0.0001697 | F2RL3(+8.655kb) CPAMD8(0) |
| rs470033    | 22 | 33071432  | 0.0001139 | -0.1185  | 0.000206  | SYN3(0)                   |
| rs10978974  | 9  | 110419626 | 0.000114  | -0.111   | 0.0001087 | .                         |
| 1:171083882 | 1  | 171083882 | 0.0001145 | 0.2842   | 0.0001667 | FMO3(0)                   |
| 1:171084954 | 1  | 171084954 | 0.0001145 | 0.2842   | 0.0001667 | FMO3(0)                   |

|             |    |           |           |          |           |                                 |
|-------------|----|-----------|-----------|----------|-----------|---------------------------------|
| rs7444394   | 5  | 88934617  | 0.0001147 | 0.1743   | 0.0002108 | .                               |
| rs6452843   | 5  | 88937598  | 0.0001147 | 0.1743   | 0.0002108 | .                               |
| rs7734229   | 5  | 88943930  | 0.0001147 | 0.1743   | 0.0002108 | .                               |
| 5:88948309  | 5  | 88948309  | 0.0001147 | 0.1743   | 0.0002108 | .                               |
| rs12655057  | 5  | 39953241  | 0.0001151 | -0.1101  | 0.0001296 | .                               |
| rs487149    | 5  | 39835837  | 0.0001154 | -0.109   | 0.0001407 | .                               |
| rs1997802   | 6  | 100160117 | 0.0001155 | 0.1026   | 0.000311  | .                               |
| rs60414095  | 15 | 27319766  | 0.0001156 | 0.09945  | 0.0001072 | .                               |
| rs930362    | 18 | 48123761  | 0.0001158 | 0.08968  | 0.0001977 | MAPK4(0)                        |
| rs629017    | 3  | 145683128 | 0.0001158 | 0.08078  | 0.000107  | .                               |
| rs10518269  | 19 | 31028666  | 0.0001159 | -0.1098  | 0.0000806 | ZNF536(0)                       |
| 1:171097635 | 1  | 171097635 | 0.0001161 | 0.284    | 0.0001681 | FMO3(+10.68kb)                  |
| rs62530796  | 8  | 71622207  | 0.0001174 | 0.163    | 0.0000958 | XKR9(0)                         |
| rs62530797  | 8  | 71622226  | 0.0001174 | 0.163    | 0.0000958 | XKR9(0)                         |
| rs17863256  | 7  | 126894799 | 0.0001176 | -0.1181  | 0.0001451 | GRM8(+2.371kb)                  |
| rs522862    | 6  | 100139610 | 0.0001179 | 0.1008   | 0.0003462 | .                               |
| rs330830    | 6  | 100047457 | 0.000118  | 0.1014   | 0.0001373 | PRDM13(-7.192kb)                |
| rs7167003   | 15 | 27319228  | 0.0001182 | 0.1003   | 0.0001097 | .                               |
| rs4840074   | 6  | 100154921 | 0.0001184 | 0.1001   | 0.0003273 | .                               |
| 7:139949206 | 7  | 139949206 | 0.0001184 | 0.1376   | 0.0001741 | .                               |
| rs9551973   | 13 | 20256342  | 0.000119  | -0.1204  | 0.0002143 | MPHOSPH8(+9.702kb)              |
| 9:116669379 | 9  | 116669379 | 0.000119  | 0.08078  | 0.0003165 | ZNF618(0)                       |
| rs4653133   | 1  | 33889839  | 0.0001191 | -0.1674  | 0.0001327 | .                               |
| 4:56166914  | 4  | 56166914  | 0.0001194 | 0.1676   | 0.0002161 | .                               |
| rs62510698  | 8  | 71813464  | 0.0001195 | 0.1403   | 0.0000898 | .                               |
| rs4944049   | 11 | 74306410  | 0.0001196 | -0.1029  | 0.0001073 | POLD3(0)                        |
| rs4944050   | 11 | 74306494  | 0.0001196 | -0.1029  | 0.0001073 | POLD3(0)                        |
| 20:22915522 | 20 | 22915522  | 0.0001198 | -0.385   | 0.0000782 | .                               |
| 20:22919913 | 20 | 22919913  | 0.0001198 | -0.385   | 0.0000782 | .                               |
| rs2206718   | 6  | 100157980 | 0.0001198 | 0.09982  | 0.0003435 | .                               |
| rs7752843   | 6  | 100159009 | 0.0001198 | 0.09982  | 0.0003435 | .                               |
| rs4839753   | 6  | 100165858 | 0.0001198 | 0.09982  | 0.0003435 | .                               |
| rs4839754   | 6  | 100165962 | 0.0001198 | 0.09982  | 0.0003435 | .                               |
| 5:88961030  | 5  | 88961030  | 0.0001199 | 0.1753   | 0.0002243 | .                               |
| rs11738960  | 5  | 88833302  | 0.0001201 | 0.1802   | 0.0001163 | .                               |
| rs11739065  | 5  | 88833679  | 0.0001201 | 0.1802   | 0.0001163 | .                               |
| 1:171115116 | 1  | 171115116 | 0.0001205 | 0.2833   | 0.0001722 | .                               |
| rs4937789   | 11 | 133392402 | 0.0001205 | 0.1212   | 0.000358  | OPCML(0)                        |
| rs12054766  | 5  | 88952313  | 0.0001205 | 0.1738   | 0.000219  | .                               |
| 2:86603856  | 2  | 86603856  | 0.0001206 | 0.3208   | 0.0006582 | .                               |
| rs494401    | 6  | 100131160 | 0.0001206 | 0.09982  | 0.0003549 | .                               |
| rs12684912  | 9  | 85478756  | 0.0001206 | -0.08136 | 0.0003514 | .                               |
| rs657862    | 6  | 100113539 | 0.0001211 | 0.1012   | 0.0002949 | .                               |
| rs16869449  | 5  | 39946183  | 0.0001212 | -0.1098  | 0.0001376 | .                               |
| rs12469559  | 2  | 134864518 | 0.0001214 | -0.08809 | 0.0001065 | .                               |
| rs12636162  | 3  | 145699215 | 0.0001218 | -0.08363 | 0.0001838 | .                               |
| rs480715    | 6  | 100035437 | 0.0001218 | 0.1001   | 0.0001476 | PRDM13(-19.21kb) CCNC(+18.75kb) |

|             |    |           |           |          |           |                    |
|-------------|----|-----------|-----------|----------|-----------|--------------------|
| rs12112047  | 7  | 36602372  | 0.0001218 | 0.1398   | 0.000226  | AOAH(0)            |
| rs1523782   | 9  | 110425385 | 0.0001218 | -0.1082  | 0.0001019 | .                  |
| 1:171107688 | 1  | 171107688 | 0.000122  | 0.2832   | 0.0001736 | .                  |
| 1:171107737 | 1  | 171107737 | 0.000122  | 0.2832   | 0.0001736 | .                  |
| 1:171108032 | 1  | 171108032 | 0.000122  | 0.2832   | 0.0001736 | .                  |
| 1:171109057 | 1  | 171109057 | 0.000122  | 0.2832   | 0.0001736 | .                  |
| 1:171110489 | 1  | 171110489 | 0.000122  | 0.2832   | 0.0001736 | .                  |
| rs951640    | 7  | 126876650 | 0.0001222 | -0.118   | 0.0001625 | GRM8(0)            |
| rs12212493  | 6  | 99653012  | 0.0001224 | -0.09348 | 0.0001214 | .                  |
| rs2290811   | 13 | 20251752  | 0.0001228 | -0.126   | 0.0002247 | MPHOSPH8(+5.112kb) |
| rs6860702   | 5  | 39952013  | 0.0001232 | -0.1096  | 0.0001397 | .                  |
| rs6880229   | 5  | 39952099  | 0.0001232 | -0.1096  | 0.0001397 | .                  |
| rs1818147   | 3  | 145703917 | 0.0001234 | -0.08347 | 0.0001761 | .                  |
| rs1102230   | 6  | 100141922 | 0.0001237 | 0.09983  | 0.0003519 | .                  |
| rs12246939  | 10 | 87916254  | 0.0001239 | -0.2575  | 0.0003727 | GRID1(0)           |
| rs7046776   | 9  | 116715706 | 0.0001239 | 0.08024  | 0.0003311 | ZNF618(0)          |
| rs2218732   | 3  | 145708268 | 0.0001241 | -0.08346 | 0.0001736 | .                  |
| rs179791    | 5  | 31380134  | 0.0001242 | 0.1148   | 0.0001549 | .                  |
| 12:59308666 | 12 | 59308666  | 0.0001244 | 0.1773   | 0.0002457 | LRIG3(0)           |
| rs10942563  | 5  | 88928962  | 0.0001244 | 0.1739   | 0.0002219 | .                  |
| rs12456376  | 18 | 7962217   | 0.0001245 | 0.08781  | 0.000113  | PTPRM(0)           |
| 3:145703251 | 3  | 145703251 | 0.0001247 | -0.0833  | 0.0001811 | .                  |
| rs586809    | 3  | 145692235 | 0.0001248 | -0.08356 | 0.0001873 | .                  |
| rs11683456  | 2  | 208222371 | 0.0001251 | -0.1002  | 0.0000445 | .                  |
| rs9356129   | 6  | 164072758 | 0.0001251 | -0.2011  | 0.0000872 | .                  |
| rs10847781  | 12 | 129628366 | 0.0001252 | -0.09312 | 0.0001918 | TMEM132D(0)        |
| 5:118276252 | 5  | 118276252 | 0.0001252 | -0.2169  | 0.0002667 | DTWD2(0)           |
| rs62328035  | 4  | 157354118 | 0.0001257 | -0.0805  | 0.0002355 | .                  |
| rs7110993   | 11 | 74360313  | 0.0001263 | -0.1019  | 0.0001028 | POLD3(+6.548kb)    |
| 12:86588232 | 12 | 86588232  | 0.0001263 | -0.2495  | 0.0001337 | MGAT4C(0)          |
| rs4944911   | 11 | 74308058  | 0.0001265 | -0.1025  | 0.0001141 | POLD3(0)           |
| rs6606871   | 15 | 27323803  | 0.0001265 | 0.09887  | 0.0001052 | .                  |
| 3:21951430  | 3  | 21951430  | 0.0001267 | -0.1961  | 0.0003861 | .                  |
| rs11201891  | 10 | 87887418  | 0.000127  | -0.2653  | 0.0003338 | GRID1(0)           |
| rs11060162  | 12 | 129633371 | 0.0001272 | -0.0937  | 0.0002199 | TMEM132D(0)        |
| rs9579202   | 13 | 29178210  | 0.000128  | 0.09532  | 0.0002865 | .                  |
| 5:88817920  | 5  | 88817920  | 0.0001282 | 0.1868   | 0.0001284 | .                  |
| 1:171209371 | 1  | 171209371 | 0.0001283 | 0.2415   | 0.000115  | FMO1(-8.291kb)     |
| rs12077760  | 1  | 171212145 | 0.0001283 | 0.2415   | 0.000115  | FMO1(-5.517kb)     |
| 1:171214979 | 1  | 171214979 | 0.0001283 | 0.2415   | 0.000115  | FMO1(-2.683kb)     |
| 1:171215123 | 1  | 171215123 | 0.0001283 | 0.2415   | 0.000115  | FMO1(-2.539kb)     |
| 1:171217066 | 1  | 171217066 | 0.0001283 | 0.2415   | 0.000115  | FMO1(-0.596kb)     |
| rs4747833   | 10 | 9663406   | 0.0001283 | 0.08088  | 0.000109  | .                  |
| 15:27314312 | 15 | 27314312  | 0.0001283 | 0.09869  | 0.0001078 | .                  |
| rs10759246  | 9  | 110425795 | 0.0001283 | -0.1078  | 0.000109  | .                  |
| 15:27320963 | 15 | 27320963  | 0.0001287 | 0.09875  | 0.0001099 | .                  |
| 15:27321760 | 15 | 27321760  | 0.0001287 | 0.09875  | 0.0001099 | .                  |

|              |    |           |           |          |           |                                 |
|--------------|----|-----------|-----------|----------|-----------|---------------------------------|
| rs11668232   | 19 | 57864488  | 0.0001289 | -0.1179  | 0.0001464 | ZNF547(-10.4kb) ZNF304(0)       |
| rs1561999    | 18 | 7964932   | 0.0001293 | 0.08875  | 0.0001057 | PTPRM(0)                        |
| rs8104557    | 19 | 31030189  | 0.0001297 | -0.1008  | 0.000079  | ZNF536(0)                       |
| rs2223681    | 6  | 100156357 | 0.0001298 | 0.0992   | 0.0003922 | .                               |
| rs2397429    | 6  | 100157242 | 0.0001298 | 0.0992   | 0.0003922 | .                               |
| rs1997801    | 6  | 100159976 | 0.0001298 | 0.0992   | 0.0003922 | .                               |
| 7:55912185   | 7  | 55912185  | 0.0001298 | -0.1209  | 0.0002224 | sep/14(0)                       |
| rs4474808    | 19 | 31027435  | 0.00013   | -0.09576 | 0.0000613 | ZNF536(0)                       |
| rs10519569   | 15 | 27320144  | 0.0001302 | 0.09872  | 0.0001106 | .                               |
| rs17760385   | 8  | 71594394  | 0.0001309 | 0.1422   | 0.0000922 | XKR9(0) LACTB2(+13kb)           |
| 10:87919895  | 10 | 87919895  | 0.000131  | -0.2566  | 0.0003946 | GRID1(0)                        |
| rs12247689   | 10 | 87924933  | 0.000131  | -0.2566  | 0.0003946 | GRID1(0)                        |
| rs4456473    | 15 | 27314701  | 0.0001313 | 0.09842  | 0.0001138 | .                               |
| 15:27316179  | 15 | 27316179  | 0.0001313 | 0.09842  | 0.0001138 | .                               |
| rs8042348    | 15 | 27317071  | 0.0001313 | 0.09842  | 0.0001138 | .                               |
| rs10519571   | 15 | 27317185  | 0.0001313 | 0.09842  | 0.0001138 | .                               |
| rs8030329    | 15 | 27317240  | 0.0001313 | 0.09842  | 0.0001138 | .                               |
| rs7247158    | 19 | 31021597  | 0.0001314 | -0.09586 | 0.0000637 | ZNF536(0)                       |
| rs501016     | 3  | 145687356 | 0.0001317 | 0.08011  | 0.0001151 | .                               |
| rs11947744   | 4  | 157352843 | 0.0001319 | -0.08028 | 0.000246  | .                               |
| rs12108214   | 4  | 157353244 | 0.0001319 | -0.08028 | 0.000246  | .                               |
| rs10816558   | 9  | 110457911 | 0.000132  | -0.1083  | 0.0002421 | .                               |
| 1:171184950  | 1  | 171184950 | 0.0001322 | 0.2411   | 0.0001185 | FMO2(+3.128kb)                  |
| 1:171185749  | 1  | 171185749 | 0.0001322 | 0.2411   | 0.0001185 | FMO2(+3.927kb)                  |
| 1:171185831  | 1  | 171185831 | 0.0001322 | 0.2411   | 0.0001185 | FMO2(+4.009kb)                  |
| 1:171187245  | 1  | 171187245 | 0.0001322 | 0.2411   | 0.0001185 | FMO2(+5.423kb)                  |
| 10:113303817 | 10 | 113303817 | 0.0001323 | 0.252    | 0.0002704 | .                               |
| rs11880530   | 19 | 35969144  | 0.0001323 | 0.1023   | 0.0002182 | KRTDAP(-9.083kb) DMKN(-18.98kb) |
| rs7002472    | 8  | 13626188  | 0.0001324 | 0.1587   | 0.0001901 | .                               |
| 1:171214111  | 1  | 171214111 | 0.0001325 | 0.2669   | 0.000164  | FMO1(-3.551kb)                  |
| rs11791331   | 9  | 110421445 | 0.0001325 | -0.1073  | 0.0001085 | .                               |
| 5:39863095   | 5  | 39863095  | 0.0001327 | -0.1083  | 0.0001643 | .                               |
| rs9649726    | 7  | 49639168  | 0.0001327 | -0.08192 | 0.0001433 | .                               |
| 11:23003290  | 11 | 23003290  | 0.0001328 | -0.106   | 0.0001565 | .                               |
| rs4513916    | 7  | 49643521  | 0.0001334 | -0.08264 | 0.0001179 | .                               |
| rs7525342    | 1  | 171148878 | 0.0001337 | 0.08225  | 0.0000874 | FMO2(-5.509kb)                  |
| 10:87922873  | 10 | 87922873  | 0.000134  | -0.2562  | 0.000403  | GRID1(0)                        |
| rs11223493   | 11 | 133386590 | 0.000134  | 0.1115   | 0.0005019 | OPCML(0)                        |
| rs11087976   | 21 | 27169308  | 0.000134  | -0.1343  | 0.0001493 | .                               |
| rs857917     | 6  | 100031814 | 0.0001341 | 0.09947  | 0.0001661 | CCNC(+15.12kb)                  |
| rs864512     | 6  | 100031957 | 0.0001341 | 0.09947  | 0.0001661 | CCNC(+15.27kb)                  |
| rs7763223    | 6  | 124332125 | 0.0001341 | 0.1183   | 0.0000655 | NKAIN2(0)                       |
| 1:171189685  | 1  | 171189685 | 0.0001344 | 0.2408   | 0.0001203 | FMO2(+7.863kb)                  |
| 1:171192425  | 1  | 171192425 | 0.0001344 | 0.2408   | 0.0001203 | FMO2(+10.6kb)                   |
| 1:171194702  | 1  | 171194702 | 0.0001344 | 0.2408   | 0.0001203 | FMO2(+12.88kb)                  |
| 1:171197792  | 1  | 171197792 | 0.0001344 | 0.2408   | 0.0001203 | FMO2(+15.97kb) FMO1(-19.87kb)   |
| 1:171198546  | 1  | 171198546 | 0.0001344 | 0.2408   | 0.0001203 | FMO2(+16.72kb) FMO1(-19.12kb)   |

|             |    |           |           |          |           |                                  |
|-------------|----|-----------|-----------|----------|-----------|----------------------------------|
| 1:171199172 | 1  | 171199172 | 0.0001344 | 0.2408   | 0.0001203 | FMO2(+17.35kb) FMO1(-18.49kb)    |
| 1:171201031 | 1  | 171201031 | 0.0001344 | 0.2408   | 0.0001203 | FMO2(+19.21kb) FMO1(-16.63kb)    |
| 1:171205267 | 1  | 171205267 | 0.0001344 | 0.2408   | 0.0001203 | FMO1(-12.39kb)                   |
| 1:171130136 | 1  | 171130136 | 0.0001345 | 0.2938   | 0.0001964 | .                                |
| rs2889397   | 15 | 27314599  | 0.0001345 | 0.09843  | 0.0001129 | .                                |
| rs9450248   | 6  | 86060171  | 0.0001346 | 0.08102  | 0.000455  | .                                |
| rs10238436  | 7  | 86370144  | 0.0001347 | -0.09403 | 0.0002372 | GRM3(0)                          |
| rs2654892   | 1  | 242673570 | 0.000135  | -0.09858 | 0.0001604 | PLD5(0)                          |
| rs10759665  | 9  | 116704397 | 0.0001353 | 0.07959  | 0.0003576 | ZNF618(0)                        |
| rs8035567   | 15 | 27317871  | 0.000136  | 0.09825  | 0.0001184 | .                                |
| rs565199    | 3  | 145691266 | 0.0001361 | -0.08304 | 0.000197  | .                                |
| rs10817539  | 9  | 116708275 | 0.0001361 | 0.07953  | 0.0003616 | ZNF618(0)                        |
| rs503489    | 6  | 100136580 | 0.0001362 | 0.09886  | 0.0004017 | .                                |
| rs538177    | 6  | 100136658 | 0.0001362 | 0.09886  | 0.0004017 | .                                |
| rs473917    | 6  | 100137647 | 0.0001362 | 0.09886  | 0.0004017 | .                                |
| rs570886    | 6  | 100142021 | 0.0001362 | 0.09886  | 0.0004017 | .                                |
| rs505023    | 6  | 100144588 | 0.0001362 | 0.09886  | 0.0004017 | .                                |
| rs532188    | 6  | 100145150 | 0.0001362 | 0.09886  | 0.0004017 | .                                |
| rs667700    | 6  | 100146584 | 0.0001362 | 0.09886  | 0.0004017 | .                                |
| rs580707    | 6  | 100147326 | 0.0001362 | 0.09886  | 0.0004017 | .                                |
| rs542383    | 6  | 100149395 | 0.0001362 | 0.09886  | 0.0004017 | .                                |
| rs513044    | 6  | 100150291 | 0.0001362 | 0.09886  | 0.0004017 | .                                |
| rs9495265   | 6  | 100155096 | 0.0001362 | 0.09886  | 0.0004017 | .                                |
| rs11154870  | 6  | 99919228  | 0.0001373 | 0.1017   | 0.0001583 | USP45(0)                         |
| rs12108383  | 4  | 157351576 | 0.0001378 | -0.08007 | 0.0002551 | .                                |
| rs12108263  | 4  | 157351596 | 0.0001381 | -0.08041 | 0.000244  | .                                |
| rs4656376   | 1  | 162640649 | 0.0001386 | 0.08068  | 0.000156  | DDR2(0)                          |
| rs10759666  | 9  | 116710616 | 0.0001386 | 0.0795   | 0.0003645 | ZNF618(0)                        |
| rs333611    | 8  | 56788951  | 0.000139  | 0.1244   | 0.0001684 | LYN(-3.434kb)                    |
| rs62510694  | 8  | 71809820  | 0.000139  | 0.1389   | 0.0001044 | .                                |
| rs976905    | 9  | 586714    | 0.0001391 | 0.0917   | 0.0002363 | KANK1(0)                         |
| rs7027151   | 9  | 110461873 | 0.0001397 | 0.08072  | 0.0001813 | .                                |
| rs28380071  | 8  | 13624739  | 0.0001402 | 0.1581   | 0.0002017 | .                                |
| 3:145688320 | 3  | 145688320 | 0.0001403 | -0.08318 | 0.0001757 | .                                |
| rs12771865  | 10 | 9659788   | 0.0001407 | 0.08062  | 0.0001325 | .                                |
| rs13213410  | 6  | 100179795 | 0.0001407 | 0.09867  | 0.0004224 | .                                |
| rs11860201  | 16 | 1864365   | 0.000141  | 0.2035   | 0.0001956 | HAGH(0) FAHD1(-12.86kb) C16orf73 |
| rs7191714   | 16 | 1864716   | 0.000141  | 0.2035   | 0.0001956 | HAGH(0) FAHD1(-12.51kb) C16orf73 |
| rs6919252   | 6  | 100164626 | 0.000141  | 0.09887  | 0.0004376 | .                                |
| rs6781994   | 3  | 145684536 | 0.0001412 | 0.07987  | 0.000127  | .                                |
| rs12695803  | 3  | 145685644 | 0.0001412 | 0.07987  | 0.000127  | .                                |
| rs489563    | 3  | 145683040 | 0.0001416 | 0.07967  | 0.0001319 | .                                |
| rs1023230   | 13 | 20270158  | 0.0001417 | -0.119   | 0.0002564 | PSPC1(-6.85kb)                   |
| 8:13633153  | 8  | 13633153  | 0.0001421 | 0.1583   | 0.0002019 | .                                |
| rs4916182   | 1  | 171164544 | 0.0001425 | 0.08195  | 0.0000864 | FMO2(0)                          |
| rs12426555  | 12 | 59302853  | 0.0001425 | 0.1738   | 0.0002487 | LRIG3(0)                         |
| rs6831956   | 4  | 157346990 | 0.0001425 | -0.08009 | 0.0002669 | .                                |

|              |    |           |           |          |           |                                  |
|--------------|----|-----------|-----------|----------|-----------|----------------------------------|
| rs56167576   | 4  | 157348167 | 0.0001425 | -0.08009 | 0.0002669 | .                                |
| rs12112531   | 7  | 49637607  | 0.0001429 | -0.08169 | 0.00015   | .                                |
| rs10978976   | 9  | 110422418 | 0.0001433 | -0.1067  | 0.0001163 | .                                |
| rs1156296    | 2  | 104606753 | 0.0001434 | -0.1088  | 0.0003788 | .                                |
| rs17867802   | 7  | 126881556 | 0.0001436 | -0.117   | 0.0001871 | GRM8(0)                          |
| rs7308704    | 12 | 129629624 | 0.000144  | -0.09216 | 0.0002233 | TMEM132D(0)                      |
| rs1023229    | 13 | 20270925  | 0.0001445 | -0.119   | 0.0002362 | PSPC1(-6.083kb)                  |
| rs7772505    | 6  | 99666305  | 0.0001448 | -0.09346 | 0.0001061 | .                                |
| 10:113316829 | 10 | 113316829 | 0.0001449 | 0.2372   | 0.0003125 | .                                |
| 10:113318222 | 10 | 113318222 | 0.0001449 | 0.2372   | 0.0003125 | .                                |
| rs478684     | 6  | 100035973 | 0.000145  | 0.09911  | 0.0001776 | PRDM13(-18.68kb) CCNC(+19.28kb)  |
| rs674070     | 6  | 100036185 | 0.000145  | 0.09911  | 0.0001776 | PRDM13(-18.46kb) CCNC(+19.5kb)   |
| rs520545     | 6  | 100036429 | 0.000145  | 0.09911  | 0.0001776 | PRDM13(-18.22kb) CCNC(+19.74kb)  |
| rs672772     | 6  | 100036452 | 0.000145  | 0.09911  | 0.0001776 | PRDM13(-18.2kb) CCNC(+19.76kb)   |
| rs574834     | 6  | 100037768 | 0.000145  | 0.09911  | 0.0001776 | PRDM13(-16.88kb)                 |
| rs12635749   | 3  | 145684600 | 0.0001451 | -0.08303 | 0.0002038 | .                                |
| rs545465     | 6  | 100037266 | 0.0001452 | 0.09917  | 0.0001757 | PRDM13(-17.38kb)                 |
| rs6941160    | 6  | 108039018 | 0.0001455 | 0.1076   | 0.0001952 | SCML4(0)                         |
| rs17688862   | 8  | 71735392  | 0.0001455 | 0.1381   | 0.0001057 | .                                |
| rs56359788   | 9  | 110434426 | 0.0001455 | -0.09925 | 0.0001877 | .                                |
| rs10230845   | 7  | 55905896  | 0.0001456 | -0.1201  | 0.0002465 | sep/14(0)                        |
| rs640199     | 6  | 100030492 | 0.000146  | 0.09906  | 0.0001826 | CCNC(+13.8kb)                    |
| rs13232203   | 7  | 126885916 | 0.000146  | -0.118   | 0.0001877 | GRM8(0)                          |
| rs12629782   | 3  | 145711776 | 0.0001463 | -0.08282 | 0.0002078 | .                                |
| rs7729566    | 5  | 88973460  | 0.0001463 | 0.1719   | 0.000244  | .                                |
| rs687039     | 6  | 100114091 | 0.0001464 | 0.1002   | 0.0003478 | .                                |
| rs10816546   | 9  | 110425583 | 0.0001464 | -0.1098  | 0.000121  | .                                |
| rs1958643    | 14 | 54320442  | 0.0001467 | -0.1124  | 0.0001297 | .                                |
| rs1156510    | 20 | 6428664   | 0.0001468 | 0.07992  | 0.0000876 | .                                |
| rs4964873    | 12 | 129625292 | 0.0001469 | -0.09151 | 0.0002022 | TMEM132D(0)                      |
| rs2058709    | 2  | 207082016 | 0.0001472 | -0.1768  | 0.0001773 | GPR1(0)                          |
| rs573806     | 6  | 100141666 | 0.0001472 | 0.0985   | 0.000421  | .                                |
| 5:118278649  | 5  | 118278649 | 0.0001473 | -0.2191  | 0.0003094 | DTWD2(0)                         |
| 5:88957871   | 5  | 88957871  | 0.0001473 | 0.1712   | 0.0002599 | .                                |
| 5:88962341   | 5  | 88962341  | 0.0001473 | 0.1712   | 0.0002599 | .                                |
| rs17472426   | 5  | 159694357 | 0.0001477 | 0.1355   | 0.0002125 | CCNJL(0)                         |
| rs2223680    | 6  | 100155845 | 0.0001477 | 0.09842  | 0.0004317 | .                                |
| 13:20266124  | 13 | 20266124  | 0.0001479 | -0.1188  | 0.0002552 | PSPC1(-10.88kb) MPHOSPH8(+19.48k |
| rs43186      | 16 | 51988993  | 0.0001479 | 0.1704   | 0.000255  | .                                |
| rs408462     | 14 | 36454920  | 0.0001481 | 0.08629  | 0.000202  | .                                |
| rs9637605    | 4  | 80676672  | 0.0001481 | -0.08643 | 0.0002607 | .                                |
| rs12877553   | 13 | 20367144  | 0.0001484 | -0.1209  | 0.0002378 | PSPC1(+10.06kb)                  |
| rs4709736    | 6  | 164072768 | 0.000149  | -0.2005  | 0.0000972 | .                                |
| rs8093406    | 18 | 7960727   | 0.0001496 | 0.08708  | 0.0001255 | PTPRM(0)                         |
| rs6570286    | 6  | 100153325 | 0.0001497 | 0.09857  | 0.0004275 | .                                |
| rs4382811    | 10 | 57463217  | 0.00015   | -0.08162 | 0.0001185 | .                                |
| rs317463     | 10 | 109963724 | 0.0001501 | -0.08047 | 0.0003653 | .                                |

|             |    |           |           |          |           |                            |
|-------------|----|-----------|-----------|----------|-----------|----------------------------|
| rs17129011  | 10 | 113319202 | 0.0001502 | 0.2364   | 0.0003303 | .                          |
| rs60149818  | 15 | 27319378  | 0.0001506 | 0.09771  | 0.0001422 | .                          |
| rs62531750  | 8  | 71566384  | 0.0001511 | 0.1381   | 0.0001138 | XKR9(-15.21kb) LACTB2(0)   |
| rs62531751  | 8  | 71567829  | 0.0001511 | 0.1381   | 0.0001138 | XKR9(-13.77kb) LACTB2(0)   |
| rs17760069  | 8  | 71574842  | 0.0001511 | 0.1381   | 0.0001138 | XKR9(-6.757kb) LACTB2(0)   |
| rs62531758  | 8  | 71575523  | 0.0001511 | 0.1381   | 0.0001138 | XKR9(-6.076kb) LACTB2(0)   |
| rs17760081  | 8  | 71575781  | 0.0001511 | 0.1381   | 0.0001138 | XKR9(-5.818kb) LACTB2(0)   |
| rs62531759  | 8  | 71576209  | 0.0001511 | 0.1381   | 0.0001138 | XKR9(-5.39kb) LACTB2(0)    |
| rs2086068   | 8  | 71583073  | 0.0001511 | 0.1381   | 0.0001138 | XKR9(0) LACTB2(+1.681kb)   |
| 8:71637763  | 8  | 71637763  | 0.0001511 | 0.1381   | 0.0001138 | XKR9(0)                    |
| rs10504483  | 8  | 71701326  | 0.0001511 | 0.1381   | 0.0001138 | .                          |
| rs4887553   | 15 | 27326689  | 0.0001513 | 0.09797  | 0.0001415 | .                          |
| rs4944926   | 11 | 74359816  | 0.0001514 | -0.1007  | 0.000131  | POLD3(+6.051kb)            |
| rs4887554   | 15 | 27326701  | 0.0001515 | 0.098    | 0.0001387 | .                          |
| rs2830287   | 21 | 27954850  | 0.0001515 | 0.1231   | 0.0001573 | CYYR1(+9.269kb)            |
| rs2161768   | 2  | 208227172 | 0.000152  | -0.09898 | 0.000054  | .                          |
| rs13109871  | 4  | 35672628  | 0.000152  | -0.139   | 0.0002003 | .                          |
| rs12825669  | 12 | 106288445 | 0.0001523 | -0.08202 | 0.0002469 | .                          |
| rs1996589   | 2  | 134865196 | 0.0001523 | -0.08339 | 0.0001486 | .                          |
| rs61877030  | 11 | 41072912  | 0.0001524 | -0.1158  | 0.0000804 | .                          |
| rs12271394  | 11 | 74367643  | 0.0001525 | -0.1014  | 0.0001933 | POLD3(+13.88kb)            |
| 15:27326090 | 15 | 27326090  | 0.0001525 | 0.09791  | 0.0001322 | .                          |
| rs490151    | 6  | 100141024 | 0.0001528 | 0.09808  | 0.00045   | .                          |
| rs60188185  | 3  | 145705952 | 0.0001531 | -0.08239 | 0.000219  | .                          |
| 5:164496101 | 5  | 164496101 | 0.0001535 | 0.3133   | 0.0001286 | .                          |
| rs4760176   | 12 | 58359547  | 0.0001536 | -0.1899  | 0.0001344 | XRCC6BP1(+8.495kb)         |
| rs11076221  | 16 | 51961543  | 0.0001536 | 0.1699   | 0.0002729 | .                          |
| rs6054258   | 20 | 6430018   | 0.0001536 | 0.07941  | 0.0000844 | .                          |
| rs17767844  | 8  | 71824730  | 0.0001536 | 0.1372   | 0.0001139 | .                          |
| 12:6040061  | 12 | 6040061   | 0.0001542 | -0.2655  | 0.0003037 | VWF(-17.98kb) TMEM16B(0)   |
| rs10251595  | 7  | 55904261  | 0.0001545 | -0.1196  | 0.000261  | sep/14(0)                  |
| rs6857645   | 4  | 131310015 | 0.0001547 | 0.09247  | 0.0002721 | .                          |
| rs6831859   | 4  | 131310016 | 0.0001547 | 0.09247  | 0.0002721 | .                          |
| rs11186524  | 10 | 93034313  | 0.0001551 | 0.1869   | 0.000184  | PCGF5(0)                   |
| 6:121155362 | 6  | 121155362 | 0.0001554 | 0.1849   | 0.0004572 | .                          |
| rs7925341   | 11 | 74351088  | 0.0001557 | -0.1007  | 0.0001447 | POLD3(0)                   |
| rs502645    | 3  | 145687497 | 0.0001557 | -0.08224 | 0.0002187 | .                          |
| 13:27794390 | 13 | 27794390  | 0.0001558 | 0.3729   | 0.0004739 | .                          |
| 13:27828450 | 13 | 27828450  | 0.0001558 | 0.3729   | 0.0004739 | RPL21(0) RASL11A(-16.01kb) |
| rs28823947  | 7  | 55906769  | 0.0001559 | -0.1193  | 0.0002651 | sep/14(0)                  |
| rs10239655  | 7  | 55908310  | 0.0001559 | -0.1193  | 0.0002651 | sep/14(0)                  |
| rs13436522  | 5  | 88863349  | 0.0001562 | 0.2227   | 0.0002061 | .                          |
| rs10978980  | 9  | 110422980 | 0.0001563 | -0.1059  | 0.0001276 | .                          |
| rs9649556   | 7  | 130939970 | 0.0001568 | 0.1287   | 0.0000258 | .                          |
| rs571992    | 5  | 31371729  | 0.0001571 | 0.1111   | 0.000155  | .                          |
| rs2817920   | 6  | 121156480 | 0.0001575 | 0.1855   | 0.0004447 | .                          |
| rs62531753  | 8  | 71571193  | 0.0001575 | 0.1378   | 0.0001197 | XKR9(-10.41kb) LACTB2(0)   |



|             |    |           |           |          |           |                    |
|-------------|----|-----------|-----------|----------|-----------|--------------------|
| rs7179648   | 15 | 27315409  | 0.0001577 | 0.09737  | 0.0001346 | .                  |
| rs2325824   | 3  | 84049731  | 0.0001577 | -0.1494  | 0.0002405 | .                  |
| rs1609606   | 13 | 20357220  | 0.0001578 | -0.1205  | 0.0002662 | PSPC1(+0.137kb)    |
| rs330825    | 6  | 100043987 | 0.0001578 | 0.09897  | 0.0001886 | PRDM13(-10.66kb)   |
| rs10982008  | 9  | 116700334 | 0.000158  | 0.07887  | 0.0004273 | ZNF618(0)          |
| rs2205729   | 1  | 171213558 | 0.0001582 | 0.08072  | 0.0000975 | FMO1(-4.104kb)     |
| rs7250841   | 19 | 31041411  | 0.0001582 | -0.09977 | 0.0001183 | ZNF536(0)          |
| 17:34013871 | 17 | 34013871  | 0.0001583 | -0.2005  | 0.0003661 | AP2B1(0)           |
| 15:55743961 | 15 | 55743961  | 0.0001585 | -0.08645 | 0.0002065 | DYX1C1(0)          |
| rs10793095  | 11 | 74357364  | 0.0001586 | -0.1003  | 0.0001408 | POLD3(+3.599kb)    |
| rs2769558   | 13 | 37174249  | 0.0001586 | 0.1066   | 0.0000706 | .                  |
| rs1523781   | 9  | 110425506 | 0.0001587 | -0.1076  | 0.0001321 | .                  |
| rs61998099  | 15 | 27335511  | 0.0001589 | 0.08949  | 0.0001973 | .                  |
| rs9886746   | 9  | 21122071  | 0.0001596 | -0.07769 | 0.0005401 | IFNW1(-18.56kb)    |
| rs16841183  | 4  | 7777150   | 0.0001606 | 0.1345   | 0.0002819 | AFAP1(0)           |
| rs490284    | 6  | 100150274 | 0.0001607 | 0.09773  | 0.0004777 | .                  |
| rs9506365   | 13 | 20312186  | 0.0001609 | -0.1202  | 0.0002572 | PSPC1(0)           |
| rs9508868   | 13 | 20312419  | 0.0001609 | -0.1202  | 0.0002572 | PSPC1(0)           |
| rs4769900   | 13 | 20313924  | 0.0001609 | -0.1202  | 0.0002572 | PSPC1(0)           |
| rs2340649   | 13 | 20337296  | 0.0001609 | -0.1202  | 0.0002572 | PSPC1(0)           |
| rs9506373   | 13 | 20338299  | 0.0001609 | -0.1202  | 0.0002572 | PSPC1(0)           |
| rs17533269  | 5  | 155314746 | 0.0001613 | 0.09999  | 0.0003374 | .                  |
| 5:155315050 | 5  | 155315050 | 0.0001613 | 0.09999  | 0.0003374 | .                  |
| 5:155315647 | 5  | 155315647 | 0.0001613 | 0.09999  | 0.0003374 | .                  |
| rs10119978  | 9  | 116707820 | 0.0001613 | 0.07864  | 0.0004212 | ZNF618(0)          |
| rs7089124   | 10 | 9662320   | 0.0001617 | 0.07951  | 0.0001291 | .                  |
| rs8041947   | 15 | 27316685  | 0.0001618 | 0.09758  | 0.0001491 | .                  |
| rs4839751   | 6  | 100158035 | 0.0001623 | 0.09796  | 0.0004336 | .                  |
| rs62569567  | 9  | 110426481 | 0.0001624 | -0.1102  | 0.0001387 | .                  |
| 4:56165296  | 4  | 56165296  | 0.0001625 | 0.1611   | 0.0002715 | .                  |
| rs1330168   | 9  | 116699080 | 0.0001628 | 0.07948  | 0.0004052 | ZNF618(0)          |
| rs28502265  | 2  | 20130145  | 0.0001629 | -0.1618  | 0.0003114 | WDR35(0)           |
| rs6967547   | 7  | 49640484  | 0.0001629 | -0.08102 | 0.0001459 | .                  |
| 6:121165003 | 6  | 121165003 | 0.0001631 | 0.1843   | 0.0004746 | .                  |
| rs1222210   | 11 | 30362125  | 0.0001633 | -0.09234 | 0.0001452 | C11orf46(+2.96kb)  |
| rs1222211   | 11 | 30362239  | 0.0001633 | -0.09234 | 0.0001452 | C11orf46(+3.074kb) |
| rs4944054   | 11 | 74358495  | 0.0001634 | -0.1002  | 0.000145  | POLD3(+4.73kb)     |
| rs4944924   | 11 | 74359298  | 0.0001634 | -0.1002  | 0.000145  | POLD3(+5.533kb)    |
| rs10226063  | 7  | 130940227 | 0.0001641 | 0.1283   | 0.0000271 | .                  |
| rs8040102   | 15 | 27323592  | 0.0001643 | 0.09763  | 0.0001366 | .                  |
| rs330844    | 6  | 100063243 | 0.0001643 | 0.101    | 0.0003669 | PRDM13(0)          |
| rs12634782  | 3  | 145684889 | 0.0001644 | -0.08204 | 0.0002461 | .                  |
| rs4978544   | 9  | 110464013 | 0.0001645 | 0.08042  | 0.0002035 | .                  |
| rs17241990  | 13 | 20319129  | 0.0001653 | -0.1203  | 0.0002591 | PSPC1(0)           |
| rs10143426  | 14 | 36453969  | 0.0001653 | 0.08607  | 0.0002435 | .                  |
| 5:117586817 | 5  | 117586817 | 0.0001654 | 0.1622   | 0.0004018 | .                  |
| rs2789030   | 6  | 121165984 | 0.0001654 | 0.1842   | 0.0004778 | .                  |

|             |    |           |           |          |           |                                   |
|-------------|----|-----------|-----------|----------|-----------|-----------------------------------|
| rs12647093  | 4  | 54417351  | 0.0001656 | -0.09847 | 0.0001236 | LNK1(0)                           |
| 8:56772483  | 8  | 56772483  | 0.0001657 | 0.1272   | 0.0002474 | LYN(-19.9kb)                      |
| 8:56772496  | 8  | 56772496  | 0.0001657 | 0.1272   | 0.0002474 | LYN(-19.89kb)                     |
| rs10978978  | 9  | 110422510 | 0.0001658 | -0.1062  | 0.0001403 | .                                 |
| rs11155033  | 6  | 100183774 | 0.0001666 | 0.09712  | 0.0004433 | .                                 |
| rs13133197  | 4  | 184365355 | 0.0001667 | 0.09833  | 0.0005095 | CDKN2AIP(-0.433kb)                |
| 15:26563112 | 15 | 26563112  | 0.0001669 | -0.1563  | 0.0005967 | .                                 |
| rs62510678  | 8  | 71782602  | 0.0001669 | 0.1363   | 0.0001328 | .                                 |
| rs9389444   | 6  | 99958250  | 0.0001672 | 0.09886  | 0.000182  | USP45(0)                          |
| rs61877031  | 11 | 41074658  | 0.0001674 | -0.1137  | 0.0001055 | .                                 |
| rs1362466   | 2  | 207055356 | 0.0001676 | -0.1689  | 0.0001389 | GPR1(0)                           |
| rs674151    | 6  | 100036128 | 0.0001677 | 0.09809  | 0.0002078 | PRDM13(-18.52kb) CCNC(+19.44kb)   |
| rs17863264  | 7  | 126916131 | 0.0001677 | -0.1159  | 0.0001934 | .                                 |
| rs12113245  | 7  | 49637461  | 0.0001677 | -0.0806  | 0.000182  | .                                 |
| rs12113253  | 7  | 49637526  | 0.0001677 | -0.0806  | 0.000182  | .                                 |
| 13:27673026 | 13 | 27673026  | 0.0001681 | 0.3657   | 0.0004429 | USP12(0)                          |
| 15:26553244 | 15 | 26553244  | 0.0001681 | -0.1588  | 0.0005807 | .                                 |
| rs473634    | 6  | 100128266 | 0.0001681 | 0.09736  | 0.0005124 | .                                 |
| rs17617422  | 5  | 155317252 | 0.0001683 | 0.1004   | 0.0003764 | .                                 |
| rs11947333  | 4  | 157355693 | 0.0001684 | -0.07925 | 0.0003111 | .                                 |
| rs58280445  | 1  | 33890277  | 0.0001686 | -0.1398  | 0.0001035 | .                                 |
| rs4938014   | 11 | 113264521 | 0.0001692 | 0.1266   | 0.0002708 | DRD2(-15.79kb) ANKK1(0)           |
| rs7924701   | 11 | 74364038  | 0.0001692 | -0.09987 | 0.000151  | POLD3(+10.27kb)                   |
| rs9651761   | 11 | 74365594  | 0.0001692 | -0.09987 | 0.000151  | POLD3(+11.83kb)                   |
| rs9651762   | 11 | 74365650  | 0.0001692 | -0.09987 | 0.000151  | POLD3(+11.88kb)                   |
| rs10219407  | 11 | 4962933   | 0.0001696 | -0.1264  | 0.0004135 | OR51G1(+17.36kb) OR51A2(-13.07kb) |
| rs883426    | 7  | 126912138 | 0.0001698 | -0.1155  | 0.0002048 | GRM8(+19.71kb)                    |
| rs11563670  | 7  | 126913475 | 0.0001698 | -0.1155  | 0.0002048 | .                                 |
| 6:85349126  | 6  | 85349126  | 0.0001699 | 0.2446   | 0.0001447 | .                                 |
| rs6656834   | 1  | 61913991  | 0.00017   | 0.3643   | 0.0001867 | NFIA(0)                           |
| rs6684071   | 1  | 61914112  | 0.00017   | 0.3643   | 0.0001867 | NFIA(0)                           |
| rs940287    | 9  | 110437175 | 0.00017   | 0.08602  | 0.0002256 | .                                 |
| rs7278774   | 21 | 27172002  | 0.0001701 | -0.1324  | 0.0001931 | .                                 |
| 21:27172291 | 21 | 27172291  | 0.0001701 | -0.1324  | 0.0001931 | .                                 |
| rs2275964   | 21 | 27173997  | 0.0001701 | -0.1324  | 0.0001931 | .                                 |
| rs644980    | 6  | 100038025 | 0.0001703 | 0.09806  | 0.0002128 | PRDM13(-16.62kb)                  |
| 3:173339048 | 3  | 173339048 | 0.0001706 | -0.1237  | 0.0002222 | NLGN1(0)                          |
| 4:56169358  | 4  | 56169358  | 0.0001706 | 0.1606   | 0.0002873 | .                                 |
| rs9385360   | 6  | 125315514 | 0.000171  | -0.1118  | 0.000177  | RNF217(0)                         |
| rs17804166  | 18 | 48123811  | 0.0001713 | 0.08746  | 0.0003009 | MAPK4(0)                          |
| rs903004    | 8  | 71775259  | 0.0001713 | 0.1363   | 0.0001284 | .                                 |
| 2:86663981  | 2  | 86663981  | 0.0001715 | 0.3902   | 0.0008557 | JMJD1A(-4.372kb)                  |
| rs1864798   | 15 | 27318312  | 0.0001719 | 0.1002   | 0.0001349 | .                                 |
| rs9366007   | 6  | 166732338 | 0.0001719 | 0.08923  | 0.000175  | SFT2D1(-1.177kb) PRR18(+10.47kb)  |
| rs1861179   | 12 | 4303181   | 0.000172  | -0.08027 | 0.0003592 | .                                 |
| rs1631451   | 11 | 30349133  | 0.0001721 | -0.09226 | 0.000149  | C11orf46(0)                       |
| rs1467863   | 22 | 22513398  | 0.0001723 | 0.1173   | 0.0001824 | .                                 |

|             |    |           |           |          |           |                  |
|-------------|----|-----------|-----------|----------|-----------|------------------|
| rs4436578   | 11 | 113306765 | 0.0001726 | 0.1253   | 0.0001858 | DRD2(0)          |
| rs9552000   | 13 | 20344704  | 0.0001726 | -0.1196  | 0.0002832 | PSPC1(0)         |
| rs9552001   | 13 | 20346122  | 0.0001726 | -0.1196  | 0.0002832 | PSPC1(0)         |
| rs8110509   | 19 | 30981639  | 0.0001728 | -0.09531 | 0.0001516 | ZNF536(0)        |
| rs11616229  | 13 | 20311240  | 0.0001729 | -0.1202  | 0.0002622 | PSPC1(0)         |
| rs7669860   | 4  | 131364190 | 0.0001733 | 0.09021  | 0.0003686 | .                |
| rs61950584  | 13 | 20368298  | 0.0001741 | -0.1197  | 0.0002854 | PSPC1(+11.21kb)  |
| rs214566    | 6  | 18270644  | 0.0001741 | 0.1227   | 0.0003119 | DEK(+5.845kb)    |
| rs330864    | 6  | 100010166 | 0.0001743 | 0.09765  | 0.0002346 | CCNC(0)          |
| rs9508876   | 13 | 20330610  | 0.0001744 | -0.1202  | 0.0002743 | PSPC1(0)         |
| rs1523780   | 9  | 110425532 | 0.0001747 | -0.1121  | 0.0001406 | .                |
| rs4964848   | 12 | 129632179 | 0.0001748 | -0.0908  | 0.0002624 | TMEM132D(0)      |
| rs334582    | 5  | 31364138  | 0.0001748 | 0.1095   | 0.0001699 | .                |
| rs330821    | 6  | 100041975 | 0.0001748 | 0.0982   | 0.0002156 | PRDM13(-12.67kb) |
| rs7797631   | 7  | 36572766  | 0.0001748 | 0.1383   | 0.000288  | AOAH(0)          |
| rs3786791   | 19 | 31026875  | 0.000175  | -0.09352 | 0.000078  | ZNF536(0)        |
| rs6117263   | 20 | 6429964   | 0.0001751 | 0.07886  | 0.0000961 | .                |
| rs10763238  | 10 | 57458517  | 0.0001753 | -0.07969 | 0.0001674 | .                |
| rs13148311  | 4  | 190303994 | 0.0001753 | 0.1421   | 0.0001109 | .                |
| rs58599202  | 7  | 139945298 | 0.0001754 | 0.1295   | 0.0002139 | .                |
| rs56008946  | 21 | 27148867  | 0.0001759 | -0.1465  | 0.0002028 | GABPA(+4.096kb)  |
| rs1413594   | 6  | 125303483 | 0.0001764 | -0.1091  | 0.0002323 | RNF217(-1.03kb)  |
| rs330848    | 6  | 100022121 | 0.0001767 | 0.09783  | 0.00022   | CCNC(+5.431kb)   |
| rs330850    | 6  | 100023574 | 0.0001767 | 0.09783  | 0.00022   | CCNC(+6.884kb)   |
| rs330861    | 6  | 100029028 | 0.0001767 | 0.09783  | 0.00022   | CCNC(+12.34kb)   |
| rs28363570  | 1  | 171080733 | 0.0001782 | 0.2783   | 0.000269  | FMO3(0)          |
| rs9506372   | 13 | 20332340  | 0.0001783 | -0.09711 | 0.0004658 | PSPC1(0)         |
| 2:144373501 | 2  | 144373501 | 0.0001785 | 0.329    | 0.0003974 | ARHGAP15(0)      |
| rs330817    | 6  | 100038805 | 0.0001786 | 0.09779  | 0.0002216 | PRDM13(-15.84kb) |
| rs330818    | 6  | 100038843 | 0.0001786 | 0.09779  | 0.0002216 | PRDM13(-15.81kb) |
| rs62569572  | 9  | 110435464 | 0.0001788 | -0.09753 | 0.0002386 | .                |
| rs930828    | 8  | 38326404  | 0.0001789 | 0.0802   | 0.0002505 | FGFR1(+0.052kb)  |
| rs1888161   | 9  | 116699278 | 0.0001789 | 0.07906  | 0.00049   | ZNF618(0)        |
| rs6906931   | 6  | 101402904 | 0.0001791 | 0.1503   | 0.000265  | .                |
| rs35947111  | 9  | 110454833 | 0.0001792 | 0.08019  | 0.0002154 | .                |
| rs4514450   | 11 | 74370956  | 0.0001793 | -0.1002  | 0.0001831 | POLD3(+17.19kb)  |
| rs35277671  | 6  | 100182889 | 0.0001794 | 0.09697  | 0.0004855 | .                |
| rs214565    | 6  | 18270789  | 0.0001796 | 0.121    | 0.0003025 | DEK(+5.99kb)     |
| rs7745012   | 6  | 99921822  | 0.0001797 | 0.09643  | 0.0002228 | USP45(0)         |
| rs12996547  | 2  | 602036    | 0.0001798 | 0.08282  | 0.000162  | .                |
| rs7751600   | 6  | 85395868  | 0.00018   | 0.1885   | 0.0002231 | .                |
| rs1916497   | 10 | 57462975  | 0.0001801 | -0.08047 | 0.0001498 | .                |
| rs7933770   | 11 | 74366909  | 0.0001806 | -0.1008  | 0.0001606 | POLD3(+13.14kb)  |
| rs6001142   | 22 | 22512579  | 0.0001807 | 0.1119   | 0.0002304 | .                |
| rs2900569   | 9  | 116689905 | 0.0001811 | 0.0791   | 0.0005115 | ZNF618(0)        |
| rs391870    | 16 | 79246535  | 0.0001816 | -0.07834 | 0.000204  | WWOX(0)          |
| rs12865117  | 13 | 20347451  | 0.000182  | -0.1192  | 0.0002993 | PSPC1(0)         |

|             |    |           |           |          |           |                |
|-------------|----|-----------|-----------|----------|-----------|----------------|
| rs12872099  | 13 | 20350760  | 0.000182  | -0.1192  | 0.0002993 | PSPC1(0)       |
| 9:18395838  | 9  | 18395838  | 0.000182  | -0.1087  | 0.0002655 | .              |
| rs12488022  | 3  | 145681925 | 0.0001822 | -0.08178 | 0.0002744 | .              |
| rs17863258  | 7  | 126898852 | 0.0001824 | -0.1148  | 0.000216  | GRM8(+6.424kb) |
| 15:26547588 | 15 | 26547588  | 0.0001825 | -0.1474  | 0.0006497 | .              |
| 4:165439705 | 4  | 165439705 | 0.0001833 | -0.1879  | 0.0001775 | .              |
| rs3861387   | 6  | 124330721 | 0.0001835 | 0.1144   | 0.0000975 | NKAIN2(0)      |
| rs17689636  | 8  | 71820248  | 0.0001835 | 0.1391   | 0.0001543 | .              |
| rs2926706   | 8  | 71165929  | 0.0001837 | 0.09143  | 0.0003266 | NCOA2(0)       |
| rs11159016  | 14 | 73861261  | 0.0001841 | -0.0989  | 0.0004788 | NUMB(0)        |
| rs10978989  | 9  | 110434871 | 0.0001842 | -0.09744 | 0.0002462 | .              |
| rs17345027  | 2  | 104599821 | 0.0001845 | -0.1108  | 0.0002743 | .              |
| rs5757117   | 22 | 22513721  | 0.0001847 | 0.1115   | 0.0002528 | .              |
| rs5757122   | 22 | 22514245  | 0.0001847 | 0.1115   | 0.0002528 | .              |
| rs2012176   | 14 | 99525417  | 0.0001849 | 0.1057   | 0.0002631 | .              |
| rs1407659   | 6  | 164074983 | 0.000185  | -0.196   | 0.0001361 | .              |
| rs1407660   | 6  | 164075094 | 0.000185  | -0.196   | 0.0001361 | .              |
| rs9495551   | 6  | 100236326 | 0.0001853 | 0.09567  | 0.0004078 | .              |
| 8:71768849  | 8  | 71768849  | 0.0001853 | 0.135    | 0.0001402 | .              |
| rs62510671  | 8  | 71770641  | 0.0001853 | 0.135    | 0.0001402 | .              |
| rs7012538   | 8  | 71773058  | 0.0001853 | 0.135    | 0.0001402 | .              |
| rs62510676  | 8  | 71779427  | 0.0001853 | 0.135    | 0.0001402 | .              |
| rs62510684  | 8  | 71788031  | 0.0001853 | 0.135    | 0.0001402 | .              |
| 8:71792521  | 8  | 71792521  | 0.0001853 | 0.135    | 0.0001402 | .              |
| rs6991910   | 8  | 71793795  | 0.0001853 | 0.135    | 0.0001402 | .              |
| rs62510686  | 8  | 71797587  | 0.0001853 | 0.135    | 0.0001402 | .              |
| rs62510689  | 8  | 71802287  | 0.0001853 | 0.135    | 0.0001402 | .              |
| rs62510690  | 8  | 71804310  | 0.0001853 | 0.135    | 0.0001402 | .              |
| rs62510691  | 8  | 71805404  | 0.0001853 | 0.135    | 0.0001402 | .              |
| 8:71807396  | 8  | 71807396  | 0.0001853 | 0.135    | 0.0001402 | .              |
| rs62510692  | 8  | 71808802  | 0.0001853 | 0.135    | 0.0001402 | .              |
| 8:71809222  | 8  | 71809222  | 0.0001853 | 0.135    | 0.0001402 | .              |
| rs62510693  | 8  | 71809755  | 0.0001853 | 0.135    | 0.0001402 | .              |
| rs55812661  | 8  | 71810582  | 0.0001853 | 0.135    | 0.0001402 | .              |
| rs56770064  | 8  | 71811750  | 0.0001853 | 0.135    | 0.0001402 | .              |
| rs17689379  | 8  | 71811922  | 0.0001853 | 0.135    | 0.0001402 | .              |
| rs17767598  | 8  | 71812542  | 0.0001853 | 0.135    | 0.0001402 | .              |
| rs62510697  | 8  | 71813079  | 0.0001853 | 0.135    | 0.0001402 | .              |
| rs62510699  | 8  | 71814063  | 0.0001853 | 0.135    | 0.0001402 | .              |
| rs62510700  | 8  | 71814692  | 0.0001853 | 0.135    | 0.0001402 | .              |
| rs60473871  | 8  | 71815161  | 0.0001853 | 0.135    | 0.0001402 | .              |
| rs60712412  | 8  | 71816329  | 0.0001853 | 0.135    | 0.0001402 | .              |
| rs17689525  | 8  | 71818623  | 0.0001853 | 0.135    | 0.0001402 | .              |
| rs62510706  | 8  | 71818740  | 0.0001853 | 0.135    | 0.0001402 | .              |
| rs17689648  | 8  | 71821115  | 0.0001853 | 0.135    | 0.0001402 | .              |
| rs62506882  | 8  | 71822219  | 0.0001853 | 0.135    | 0.0001402 | .              |
| rs17689672  | 8  | 71822383  | 0.0001853 | 0.135    | 0.0001402 | .              |

|             |    |           |           |          |           |                                  |
|-------------|----|-----------|-----------|----------|-----------|----------------------------------|
| rs62506884  | 8  | 71824658  | 0.0001853 | 0.135    | 0.0001402 | .                                |
| rs62506885  | 8  | 71826064  | 0.0001853 | 0.135    | 0.0001402 | .                                |
| rs62506887  | 8  | 71831353  | 0.0001853 | 0.135    | 0.0001402 | .                                |
| rs62506888  | 8  | 71831389  | 0.0001853 | 0.135    | 0.0001402 | .                                |
| rs58970266  | 8  | 71831566  | 0.0001853 | 0.135    | 0.0001402 | .                                |
| rs60988842  | 8  | 71831723  | 0.0001853 | 0.135    | 0.0001402 | .                                |
| rs7862557   | 9  | 75117118  | 0.0001854 | -0.07845 | 0.0002861 | TMC1(-19.6kb)                    |
| 2:142777214 | 2  | 142777214 | 0.0001855 | 0.1943   | 0.0000921 | LRP1B(0)                         |
| rs1219396   | 11 | 121760604 | 0.0001856 | -0.08712 | 0.0001682 | .                                |
| rs10903683  | 10 | 2183307   | 0.0001861 | 0.07744  | 0.0002474 | .                                |
| 5:127112768 | 5  | 127112768 | 0.0001862 | 0.2658   | 0.000404  | .                                |
| rs1582259   | 7  | 126891893 | 0.0001864 | -0.09805 | 0.0003766 | GRM8(0)                          |
| rs7974356   | 12 | 129624443 | 0.0001866 | -0.09332 | 0.0003114 | TMEM132D(0)                      |
| rs2146464   | 6  | 164075611 | 0.0001867 | -0.1959  | 0.0001362 | .                                |
| rs2654891   | 1  | 242673109 | 0.0001869 | -0.09703 | 0.0002237 | PLD5(0)                          |
| rs17222916  | 19 | 31029328  | 0.000187  | -0.1058  | 0.00015   | ZNF536(0)                        |
| rs7829445   | 8  | 71590604  | 0.0001872 | 0.1352   | 0.0001398 | XKR9(0) LACTB2(+9.212kb)         |
| rs17687694  | 8  | 71594216  | 0.0001872 | 0.1352   | 0.0001398 | XKR9(0) LACTB2(+12.82kb)         |
| rs62533067  | 8  | 71595220  | 0.0001872 | 0.1352   | 0.0001398 | XKR9(0) LACTB2(+13.83kb)         |
| 8:71598192  | 8  | 71598192  | 0.0001872 | 0.1352   | 0.0001398 | XKR9(0) LACTB2(+16.8kb)          |
| rs12352417  | 9  | 18393763  | 0.0001872 | -0.1067  | 0.0003043 | .                                |
| rs60530514  | 21 | 27166699  | 0.0001874 | -0.1396  | 0.0002398 | .                                |
| rs12988195  | 2  | 207043728 | 0.0001875 | -0.1799  | 0.0002995 | NDUFS1(+19.54kb) GPR1(0) EEF1B2( |
| rs2279827   | 3  | 113952103 | 0.000189  | -0.08297 | 0.00033   | ZNF80(-1.376kb)                  |
| rs4126709   | 13 | 20297346  | 0.0001896 | -0.09711 | 0.0005028 | PSPC1(0)                         |
| rs34415191  | 13 | 20334407  | 0.0001897 | -0.1195  | 0.0002965 | PSPC1(0)                         |
| rs11945922  | 4  | 35590139  | 0.0001899 | -0.1018  | 0.000331  | .                                |
| rs7070623   | 10 | 57438188  | 0.0001901 | -0.07903 | 0.000145  | .                                |
| rs10794864  | 10 | 2182085   | 0.0001904 | 0.07682  | 0.0002775 | .                                |
| rs1169032   | 14 | 36249574  | 0.0001904 | -0.08527 | 0.0004014 | GARNL1(0)                        |
| rs10047672  | 13 | 20266301  | 0.000191  | -0.09645 | 0.0005405 | PSPC1(-10.71kb) MPHOSPH8(+19.66k |
| rs10864734  | 1  | 230422210 | 0.0001913 | -0.08363 | 0.0001358 | GALNT2(+4.264kb)                 |
| rs4756214   | 11 | 35365938  | 0.0001917 | 0.07935  | 0.0001809 | SLC1A2(0)                        |
| rs9508885   | 13 | 20351246  | 0.0001917 | -0.0977  | 0.0004558 | PSPC1(0)                         |
| rs57497833  | 8  | 71832853  | 0.0001918 | 0.1347   | 0.0001457 | .                                |
| rs62506892  | 8  | 71834565  | 0.0001918 | 0.1347   | 0.0001457 | .                                |
| 8:71834997  | 8  | 71834997  | 0.0001918 | 0.1347   | 0.0001457 | .                                |
| rs62506893  | 8  | 71835037  | 0.0001918 | 0.1347   | 0.0001457 | .                                |
| rs2329584   | 5  | 27483129  | 0.0001926 | 0.08088  | 0.000261  | .                                |
| rs11694427  | 2  | 208259170 | 0.0001931 | -0.09239 | 0.0000894 | .                                |
| rs2206047   | 1  | 25194700  | 0.0001932 | 0.07995  | 0.0002567 | .                                |
| rs10199707  | 2  | 134870080 | 0.0001932 | -0.08245 | 0.0001919 | .                                |
| rs1536965   | 9  | 116707207 | 0.0001933 | 0.07787  | 0.0005021 | ZNF618(0)                        |
| rs4709002   | 6  | 164075240 | 0.0001934 | -0.1954  | 0.0001426 | .                                |
| rs6903828   | 6  | 99665310  | 0.0001936 | -0.09068 | 0.0001635 | .                                |
| rs59031227  | 21 | 27155245  | 0.0001942 | -0.1306  | 0.0001903 | GABPA(+10.47kb)                  |
| rs10914692  | 1  | 33832933  | 0.0001943 | -0.1595  | 0.000222  | PHC2(0)                          |

|             |    |           |           |          |           |                  |
|-------------|----|-----------|-----------|----------|-----------|------------------|
| rs1466792   | 12 | 42126988  | 0.0001943 | -0.09204 | 0.000272  | .                |
| rs4711037   | 6  | 22907994  | 0.0001944 | 0.1071   | 0.000363  | .                |
| 8:71719716  | 8  | 71719716  | 0.0001944 | 0.1346   | 0.0001469 | .                |
| rs4255165   | 8  | 71720578  | 0.0001944 | 0.1346   | 0.0001469 | .                |
| rs62508824  | 8  | 71724772  | 0.0001944 | 0.1346   | 0.0001469 | .                |
| 8:71725930  | 8  | 71725930  | 0.0001944 | 0.1346   | 0.0001469 | .                |
| 8:71725966  | 8  | 71725966  | 0.0001944 | 0.1346   | 0.0001469 | .                |
| rs62508831  | 8  | 71732765  | 0.0001944 | 0.1346   | 0.0001469 | .                |
| rs62508832  | 8  | 71733031  | 0.0001944 | 0.1346   | 0.0001469 | .                |
| rs41331944  | 8  | 71736073  | 0.0001944 | 0.1346   | 0.0001469 | .                |
| rs17688987  | 8  | 71738304  | 0.0001944 | 0.1346   | 0.0001469 | .                |
| rs17689052  | 8  | 71740243  | 0.0001944 | 0.1346   | 0.0001469 | .                |
| rs17767184  | 8  | 71743616  | 0.0001944 | 0.1346   | 0.0001469 | .                |
| rs720322    | 8  | 71748143  | 0.0001944 | 0.1346   | 0.0001469 | .                |
| rs62510662  | 8  | 71753407  | 0.0001944 | 0.1346   | 0.0001469 | .                |
| rs62510663  | 8  | 71754487  | 0.0001944 | 0.1346   | 0.0001469 | .                |
| 8:71756311  | 8  | 71756311  | 0.0001944 | 0.1346   | 0.0001469 | .                |
| rs62510664  | 8  | 71757374  | 0.0001944 | 0.1346   | 0.0001469 | .                |
| rs330829    | 6  | 100045810 | 0.0001946 | 0.1016   | 0.000251  | PRDM13(-8.839kb) |
| rs2178131   | 3  | 84054848  | 0.000195  | -0.1434  | 0.0002893 | .                |
| rs4964875   | 12 | 129625001 | 0.0001951 | -0.0896  | 0.0002672 | TMEM132D(0)      |
| rs12235793  | 9  | 110432715 | 0.0001952 | -0.09781 | 0.0002523 | .                |
| rs4939639   | 18 | 48129226  | 0.0001959 | -0.08009 | 0.0002185 | MAPK4(0)         |
| rs9376188   | 6  | 99918660  | 0.000196  | 0.09661  | 0.0002374 | USP45(0)         |
| rs12684911  | 9  | 85478557  | 0.0001961 | -0.0794  | 0.0004946 | .                |
| 21:27152806 | 21 | 27152806  | 0.0001962 | -0.1304  | 0.0001937 | GABPA(+8.035kb)  |
| rs2340311   | 13 | 20363986  | 0.0001963 | -0.1187  | 0.0003334 | PSPC1(+6.903kb)  |
| rs61580118  | 7  | 139948364 | 0.0001964 | 0.1265   | 0.0002541 | .                |
| rs7867998   | 9  | 116710546 | 0.0001966 | 0.07842  | 0.0004989 | ZNF618(0)        |
| rs1840882   | 8  | 71627722  | 0.0001971 | 0.1347   | 0.0001511 | XKR9(0)          |
| rs10798252  | 1  | 171156431 | 0.000198  | 0.07898  | 0.0001168 | FMO2(0)          |
| rs1023818   | 13 | 69727042  | 0.000198  | 0.08827  | 0.0003524 | .                |
| rs7843471   | 8  | 5952081   | 0.000198  | -0.08924 | 0.0006857 | .                |
| rs7127630   | 11 | 74369889  | 0.0001981 | -0.09934 | 0.0001689 | POLD3(+16.12kb)  |
| rs12672363  | 7  | 55907992  | 0.0001981 | -0.1234  | 0.0003691 | sep/14(0)        |
| rs7998948   | 13 | 20373628  | 0.0001983 | -0.1195  | 0.0003052 | PSPC1(+16.55kb)  |
| rs9506380   | 13 | 20374233  | 0.0001983 | -0.1195  | 0.0003052 | PSPC1(+17.15kb)  |
| rs620791    | 6  | 100019358 | 0.0001983 | 0.09649  | 0.0003048 | CCNC(+2.668kb)   |
| rs9886796   | 9  | 21121917  | 0.0001987 | -0.0766  | 0.0007209 | IFNW1(-18.71kb)  |
| rs11806072  | 1  | 171156997 | 0.0001988 | 0.0795   | 0.0001193 | FMO2(0)          |
| rs16869386  | 5  | 39883968  | 0.0001991 | -0.1059  | 0.0002675 | .                |
| rs58175176  | 7  | 66889789  | 0.0001991 | 0.08045  | 0.0002803 | .                |
| rs10899016  | 11 | 74332201  | 0.0001994 | -0.09908 | 0.000175  | POLD3(0)         |
| rs9551990   | 13 | 20303529  | 0.0001994 | -0.09644 | 0.0005222 | PSPC1(0)         |
| rs12554278  | 9  | 85485681  | 0.0001996 | -0.07884 | 0.0005627 | .                |
| rs10817536  | 9  | 116701038 | 0.0001997 | 0.07783  | 0.000571  | ZNF618(0)        |
| rs17051005  | 4  | 131313198 | 0.0002001 | 0.0887   | 0.0003196 | .                |

|            |    |           |           |          |           |                          |
|------------|----|-----------|-----------|----------|-----------|--------------------------|
| rs12345493 | 9  | 110422291 | 0.0002001 | -0.1049  | 0.000152  | .                        |
| rs2967223  | 5  | 40017635  | 0.0002005 | -0.1063  | 0.0002555 | .                        |
| rs35189176 | 9  | 116674608 | 0.0002006 | 0.07858  | 0.0005293 | ZNF618(0)                |
| rs4979258  | 9  | 110463168 | 0.000201  | 0.07924  | 0.000249  | .                        |
| rs62530771 | 8  | 71601252  | 0.0002012 | 0.1343   | 0.0001527 | XKR9(0) LACTB2(+19.86kb) |
| rs62530774 | 8  | 71602344  | 0.0002012 | 0.1343   | 0.0001527 | XKR9(0)                  |
| rs62530776 | 8  | 71606235  | 0.0002012 | 0.1343   | 0.0001527 | XKR9(0)                  |
| rs62530786 | 8  | 71612471  | 0.0002012 | 0.1343   | 0.0001527 | XKR9(0)                  |
| rs62530788 | 8  | 71615447  | 0.0002012 | 0.1343   | 0.0001527 | XKR9(0)                  |
| rs60740657 | 8  | 71616929  | 0.0002012 | 0.1343   | 0.0001527 | XKR9(0)                  |
| 8:71617848 | 8  | 71617848  | 0.0002012 | 0.1343   | 0.0001527 | XKR9(0)                  |
| rs62530791 | 8  | 71618094  | 0.0002012 | 0.1343   | 0.0001527 | XKR9(0)                  |
| rs59475699 | 8  | 71621716  | 0.0002012 | 0.1343   | 0.0001527 | XKR9(0)                  |
| rs62530813 | 8  | 71625536  | 0.0002012 | 0.1343   | 0.0001527 | XKR9(0)                  |
| rs62530814 | 8  | 71626953  | 0.0002012 | 0.1343   | 0.0001527 | XKR9(0)                  |
| rs1840881  | 8  | 71627607  | 0.0002012 | 0.1343   | 0.0001527 | XKR9(0)                  |
| 8:71628096 | 8  | 71628096  | 0.0002012 | 0.1343   | 0.0001527 | XKR9(0)                  |
| rs55738144 | 8  | 71632326  | 0.0002012 | 0.1343   | 0.0001527 | XKR9(0)                  |
| rs62530820 | 8  | 71633257  | 0.0002012 | 0.1343   | 0.0001527 | XKR9(0)                  |
| rs62530821 | 8  | 71633391  | 0.0002012 | 0.1343   | 0.0001527 | XKR9(0)                  |
| 8:71639767 | 8  | 71639767  | 0.0002012 | 0.1343   | 0.0001527 | XKR9(0)                  |
| rs2198916  | 8  | 71643342  | 0.0002012 | 0.1343   | 0.0001527 | XKR9(0)                  |
| 8:71644023 | 8  | 71644023  | 0.0002012 | 0.1343   | 0.0001527 | XKR9(0)                  |
| rs62530832 | 8  | 71647360  | 0.0002012 | 0.1343   | 0.0001527 | XKR9(0)                  |
| rs62530845 | 8  | 71647437  | 0.0002012 | 0.1343   | 0.0001527 | XKR9(0)                  |
| 8:71689891 | 8  | 71689891  | 0.0002012 | 0.1343   | 0.0001527 | .                        |
| rs62508768 | 8  | 71691529  | 0.0002012 | 0.1343   | 0.0001527 | .                        |
| rs62508769 | 8  | 71692238  | 0.0002012 | 0.1343   | 0.0001527 | .                        |
| rs62508772 | 8  | 71692738  | 0.0002012 | 0.1343   | 0.0001527 | .                        |
| rs62508773 | 8  | 71692966  | 0.0002012 | 0.1343   | 0.0001527 | .                        |
| rs62508775 | 8  | 71693896  | 0.0002012 | 0.1343   | 0.0001527 | .                        |
| rs62508776 | 8  | 71694535  | 0.0002012 | 0.1343   | 0.0001527 | .                        |
| rs62508778 | 8  | 71695205  | 0.0002012 | 0.1343   | 0.0001527 | .                        |
| rs4424298  | 8  | 71698079  | 0.0002012 | 0.1343   | 0.0001527 | .                        |
| rs62508782 | 8  | 71698507  | 0.0002012 | 0.1343   | 0.0001527 | .                        |
| rs7461395  | 8  | 71698882  | 0.0002012 | 0.1343   | 0.0001527 | .                        |
| rs10504482 | 8  | 71700599  | 0.0002012 | 0.1343   | 0.0001527 | .                        |
| rs61687485 | 8  | 71706434  | 0.0002012 | 0.1343   | 0.0001527 | .                        |
| rs62508816 | 8  | 71710194  | 0.0002012 | 0.1343   | 0.0001527 | .                        |
| rs11154871 | 6  | 99920126  | 0.0002016 | 0.09656  | 0.0002408 | USP45(0)                 |
| rs34353991 | 6  | 99921206  | 0.0002016 | 0.09656  | 0.0002408 | USP45(0)                 |
| rs9508797  | 13 | 31130539  | 0.0002017 | -0.1246  | 0.0002681 | .                        |
| rs12188954 | 5  | 39894335  | 0.0002017 | -0.1056  | 0.0002459 | .                        |
| rs9506371  | 13 | 20332182  | 0.0002018 | -0.09643 | 0.0005186 | PSPC1(0)                 |
| rs11563669 | 7  | 126921532 | 0.000202  | -0.1142  | 0.0002319 | .                        |
| rs1105886  | 4  | 41611575  | 0.0002035 | -0.09047 | 0.0001985 | LIMCH1(0)                |
| rs10817541 | 9  | 116722391 | 0.0002035 | 0.07799  | 0.000637  | ZNF618(0)                |

|             |    |           |           |          |           |                                   |
|-------------|----|-----------|-----------|----------|-----------|-----------------------------------|
| 8:13633895  | 8  | 13633895  | 0.0002036 | 0.1548   | 0.0002889 | .                                 |
| rs4936194   | 11 | 133392555 | 0.0002041 | 0.1172   | 0.0005554 | OPCML(0)                          |
| rs4936195   | 11 | 133392702 | 0.0002041 | 0.1172   | 0.0005554 | OPCML(0)                          |
| rs10914694  | 1  | 33841283  | 0.0002043 | -0.158   | 0.0002259 | PHC2(+0.089kb)                    |
| rs6684564   | 1  | 33891131  | 0.0002044 | -0.1353  | 0.0001545 | .                                 |
| rs665355    | 5  | 31371619  | 0.0002047 | 0.1091   | 0.0002036 | .                                 |
| rs7981042   | 13 | 31130986  | 0.0002049 | -0.1244  | 0.000272  | .                                 |
| rs12857167  | 13 | 20414822  | 0.0002051 | -0.1191  | 0.0003381 | ZMYM5(0)                          |
| rs10891545  | 11 | 113258065 | 0.0002053 | 0.119    | 0.0003367 | ANKK1(-0.447kb)                   |
| rs6861054   | 5  | 40892204  | 0.0002053 | 0.0799   | 0.0005828 | C7(-17.39kb)                      |
| 8:13627211  | 8  | 13627211  | 0.0002055 | 0.2175   | 0.0001302 | .                                 |
| rs12241146  | 10 | 93005884  | 0.0002058 | 0.189    | 0.00024   | PCGF5(0)                          |
| 21:27158123 | 21 | 27158123  | 0.0002063 | -0.1298  | 0.000216  | GABPA(+13.35kb)                   |
| 4:131400290 | 4  | 131400290 | 0.0002063 | 0.08882  | 0.0003618 | .                                 |
| rs1506188   | 5  | 40018284  | 0.0002063 | -0.1063  | 0.0002607 | .                                 |
| rs7675819   | 4  | 41613341  | 0.0002065 | -0.09032 | 0.0002138 | LIMCH1(0)                         |
| rs953180    | 5  | 40031255  | 0.0002065 | -0.1068  | 0.0002531 | .                                 |
| rs7934321   | 11 | 74310679  | 0.0002066 | -0.0991  | 0.0001862 | POLD3(0)                          |
| rs9551987   | 13 | 20289306  | 0.0002067 | -0.1177  | 0.0003346 | PSPC1(0)                          |
| rs1506170   | 5  | 40002766  | 0.0002068 | -0.1062  | 0.0002482 | .                                 |
| rs10903681  | 10 | 2175613   | 0.0002071 | 0.07622  | 0.000293  | .                                 |
| rs4987094   | 11 | 113215923 | 0.0002071 | 0.1376   | 0.0003977 | TTC12(0)                          |
| rs347675    | 17 | 74275160  | 0.0002074 | 0.129    | 0.0003054 | QRICH2(0) FAM100B(+7.785kb)       |
| 7:139943222 | 7  | 139943222 | 0.0002074 | 0.1276   | 0.0002425 | .                                 |
| rs10836376  | 11 | 35366551  | 0.0002075 | 0.07853  | 0.0001945 | SLC1A2(0)                         |
| rs9551975   | 13 | 20257703  | 0.0002075 | -0.09656 | 0.0005517 | PSPC1(-19.3kb) MPHOSPH8(+11.06kb) |
| rs1858776   | 7  | 126903303 | 0.0002076 | -0.1136  | 0.0002562 | GRM8(+10.88kb)                    |
| rs7032602   | 9  | 110463371 | 0.0002081 | 0.07958  | 0.000286  | .                                 |
| rs10982017  | 9  | 116722693 | 0.0002082 | 0.078    | 0.0006364 | ZNF618(0)                         |
| 2:86756914  | 2  | 86756914  | 0.0002086 | 0.2967   | 0.0007072 | VPS24(0)                          |
| 3:47554937  | 3  | 47554937  | 0.0002086 | -0.2348  | 0.0002723 | TMEM103(0)                        |
| rs330852    | 6  | 100023604 | 0.0002086 | 0.09698  | 0.0002642 | CCNC(+6.914kb)                    |
| rs11751947  | 6  | 100206333 | 0.0002088 | 0.09658  | 0.0004728 | .                                 |
| rs1176717   | 11 | 113855342 | 0.0002092 | -0.09274 | 0.0005374 | HTR3A(0)                          |
| rs9551944   | 13 | 20234519  | 0.0002093 | -0.1235  | 0.0004022 | MPHOSPH8(0)                       |
| rs9551950   | 13 | 20236083  | 0.0002093 | -0.1235  | 0.0004022 | MPHOSPH8(0)                       |
| rs1605845   | 4  | 131320912 | 0.0002093 | 0.08835  | 0.0003415 | .                                 |
| rs10487475  | 7  | 126919592 | 0.0002093 | -0.1139  | 0.000243  | .                                 |
| rs28384814  | 1  | 171218592 | 0.0002094 | 0.2351   | 0.0002034 | FMO1(0)                           |
| rs10120815  | 9  | 85479417  | 0.0002096 | -0.0785  | 0.0005548 | .                                 |
| rs6592578   | 11 | 74364527  | 0.0002099 | -0.09848 | 0.0002018 | POLD3(+10.76kb)                   |
| rs10805091  | 4  | 41620334  | 0.0002103 | -0.08964 | 0.0002029 | LIMCH1(0)                         |
| rs8134202   | 21 | 27151431  | 0.0002106 | -0.1298  | 0.0002087 | GABPA(+6.66kb)                    |
| rs61215375  | 21 | 27151640  | 0.0002106 | -0.1298  | 0.0002087 | GABPA(+6.869kb)                   |
| rs7495414   | 15 | 55740080  | 0.0002109 | -0.08429 | 0.0002823 | DYX1C1(0)                         |
| rs7299514   | 12 | 129626602 | 0.0002113 | -0.09078 | 0.0003379 | TMEM132D(0)                       |
| rs59047561  | 15 | 27312339  | 0.0002114 | 0.09636  | 0.0001671 | .                                 |



|             |    |           |           |          |           |                  |
|-------------|----|-----------|-----------|----------|-----------|------------------|
| rs6592576   | 11 | 74326821  | 0.0002115 | -0.0987  | 0.000186  | POLD3(0)         |
| rs41523048  | 6  | 125344513 | 0.0002119 | -0.1508  | 0.0001774 | RNF217(0)        |
| rs10912475  | 1  | 171135764 | 0.0002121 | 0.07852  | 0.0001272 | FMO2(-18.62kb)   |
| rs7984626   | 13 | 20324212  | 0.0002122 | -0.1197  | 0.0003271 | PSPC1(0)         |
| rs4916758   | 5  | 88908319  | 0.0002123 | 0.1701   | 0.0003749 | .                |
| rs6592575   | 11 | 74323006  | 0.0002124 | -0.09811 | 0.0002207 | POLD3(0)         |
| rs1324479   | 1  | 33903807  | 0.0002125 | -0.1352  | 0.0001482 | .                |
| rs10816557  | 9  | 110452761 | 0.0002126 | -0.1007  | 0.0004367 | .                |
| rs2939382   | 5  | 39996666  | 0.0002127 | -0.1058  | 0.0002469 | .                |
| rs7516983   | 1  | 33897445  | 0.000213  | -0.1345  | 0.000157  | .                |
| rs10914713  | 1  | 33898497  | 0.000213  | -0.1345  | 0.000157  | .                |
| rs3862671   | 18 | 48130861  | 0.0002131 | -0.07858 | 0.0002457 | MAPK4(0)         |
| rs2218003   | 18 | 48127996  | 0.0002132 | -0.07939 | 0.000199  | MAPK4(0)         |
| rs2789032   | 6  | 121170309 | 0.0002133 | 0.1669   | 0.000517  | .                |
| rs16869364  | 5  | 39851551  | 0.0002137 | -0.1048  | 0.0002617 | .                |
| rs10937859  | 4  | 7776143   | 0.0002138 | 0.1306   | 0.0003974 | AFAP1(0)         |
| rs17137601  | 15 | 27312543  | 0.0002144 | 0.09622  | 0.0001711 | .                |
| 15:27313922 | 15 | 27313922  | 0.0002144 | 0.09622  | 0.0001711 | .                |
| rs10149442  | 14 | 73837051  | 0.0002146 | -0.09675 | 0.0005603 | NUMB(0)          |
| 13:99849629 | 13 | 99849629  | 0.0002147 | -0.1339  | 0.0003482 | UBAC2(-3.533kb)  |
| 13:99849973 | 13 | 99849973  | 0.0002147 | -0.1339  | 0.0003482 | UBAC2(-3.189kb)  |
| rs9400337   | 6  | 110202303 | 0.0002147 | -0.07602 | 0.0002617 | .                |
| rs9400338   | 6  | 110202342 | 0.0002147 | -0.07602 | 0.0002617 | .                |
| rs10798240  | 1  | 171136436 | 0.0002148 | 0.07841  | 0.0001298 | FMO2(-17.95kb)   |
| rs1765139   | 11 | 30353725  | 0.0002149 | -0.09243 | 0.000168  | C11orf46(0)      |
| rs4932550   | 15 | 92070982  | 0.0002151 | 0.07746  | 0.0003305 | .                |
| rs7278741   | 21 | 27953157  | 0.0002151 | 0.1189   | 0.0002137 | CYYR1(+7.576kb)  |
| rs7279134   | 21 | 27953614  | 0.0002151 | 0.1189   | 0.0002137 | CYYR1(+8.033kb)  |
| rs4944931   | 11 | 74371366  | 0.0002155 | -0.09857 | 0.0001937 | POLD3(+17.6kb)   |
| rs17705416  | 19 | 35966584  | 0.0002156 | 0.09876  | 0.0003448 | KRTDAP(-11.64kb) |
| rs28561458  | 19 | 35966656  | 0.0002156 | 0.09876  | 0.0003448 | KRTDAP(-11.57kb) |
| rs7359274   | 15 | 26552034  | 0.0002165 | -0.1452  | 0.0007737 | .                |
| 4:56163658  | 4  | 56163658  | 0.0002165 | 0.1573   | 0.0003694 | .                |
| rs6850709   | 4  | 56163804  | 0.0002165 | 0.1573   | 0.0003694 | .                |
| 4:56163914  | 4  | 56163914  | 0.0002165 | 0.1573   | 0.0003694 | .                |
| 4:56163923  | 4  | 56163923  | 0.0002165 | 0.1573   | 0.0003694 | .                |
| 4:56163962  | 4  | 56163962  | 0.0002165 | 0.1573   | 0.0003694 | .                |
| rs28887180  | 4  | 56164725  | 0.0002165 | 0.1573   | 0.0003694 | .                |
| rs28887809  | 4  | 56164775  | 0.0002165 | 0.1573   | 0.0003694 | .                |
| 4:56164971  | 4  | 56164971  | 0.0002165 | 0.1573   | 0.0003694 | .                |
| 4:56165079  | 4  | 56165079  | 0.0002165 | 0.1573   | 0.0003694 | .                |
| 4:56166037  | 4  | 56166037  | 0.0002165 | 0.1573   | 0.0003694 | .                |
| 4:56166125  | 4  | 56166125  | 0.0002165 | 0.1573   | 0.0003694 | .                |
| 4:56166451  | 4  | 56166451  | 0.0002165 | 0.1573   | 0.0003694 | .                |
| 4:56168974  | 4  | 56168974  | 0.0002165 | 0.1573   | 0.0003694 | .                |
| 4:56169091  | 4  | 56169091  | 0.0002165 | 0.1573   | 0.0003694 | .                |
| 4:56169260  | 4  | 56169260  | 0.0002165 | 0.1573   | 0.0003694 | .                |

|             |    |           |           |          |           |                                   |
|-------------|----|-----------|-----------|----------|-----------|-----------------------------------|
| 4:56169285  | 4  | 56169285  | 0.0002165 | 0.1573   | 0.0003694 | .                                 |
| 4:56169506  | 4  | 56169506  | 0.0002165 | 0.1573   | 0.0003694 | .                                 |
| rs6820809   | 4  | 56169604  | 0.0002165 | 0.1573   | 0.0003694 | .                                 |
| rs6826004   | 4  | 56169625  | 0.0002165 | 0.1573   | 0.0003694 | .                                 |
| rs6843323   | 4  | 56169775  | 0.0002165 | 0.1573   | 0.0003694 | .                                 |
| rs10740623  | 10 | 57461145  | 0.0002169 | -0.07843 | 0.0002108 | .                                 |
| 2:201636955 | 2  | 201636955 | 0.0002171 | -0.1395  | 0.0005118 | .                                 |
| rs575965    | 6  | 100122621 | 0.000218  | 0.1006   | 0.0004934 | .                                 |
| rs9506357   | 13 | 20258405  | 0.0002181 | -0.09452 | 0.0005671 | PSPC1(-18.6kb) MPHOSPH8(+11.77kb) |
| rs685202    | 5  | 31383849  | 0.0002187 | 0.1086   | 0.0002358 | RNASEN(-16.75kb)                  |
| 2:142782510 | 2  | 142782510 | 0.0002188 | 0.1892   | 0.0001234 | LRP1B(0)                          |
| rs16847942  | 2  | 142783143 | 0.0002188 | 0.1892   | 0.0001234 | LRP1B(0)                          |
| rs4945787   | 6  | 108050222 | 0.0002188 | 0.1077   | 0.0003509 | SCML4(0)                          |
| rs6995996   | 8  | 71654364  | 0.0002188 | 0.1339   | 0.0001578 | XKR9(+6.187kb)                    |
| rs41517045  | 8  | 71654499  | 0.0002188 | 0.1339   | 0.0001578 | XKR9(+6.322kb)                    |
| rs62532060  | 8  | 71656540  | 0.0002188 | 0.1339   | 0.0001578 | XKR9(+8.363kb)                    |
| rs62532064  | 8  | 71659715  | 0.0002188 | 0.1339   | 0.0001578 | XKR9(+11.54kb)                    |
| rs62532065  | 8  | 71660827  | 0.0002188 | 0.1339   | 0.0001578 | XKR9(+12.65kb)                    |
| 8:71662053  | 8  | 71662053  | 0.0002188 | 0.1339   | 0.0001578 | XKR9(+13.88kb)                    |
| 8:71664444  | 8  | 71664444  | 0.0002188 | 0.1339   | 0.0001578 | XKR9(+16.27kb)                    |
| rs55804609  | 8  | 71665250  | 0.0002188 | 0.1339   | 0.0001578 | XKR9(+17.07kb)                    |
| rs60481777  | 8  | 71669498  | 0.0002188 | 0.1339   | 0.0001578 | .                                 |
| rs62532102  | 8  | 71670448  | 0.0002188 | 0.1339   | 0.0001578 | .                                 |
| 8:71670554  | 8  | 71670554  | 0.0002188 | 0.1339   | 0.0001578 | .                                 |
| rs62532103  | 8  | 71673249  | 0.0002188 | 0.1339   | 0.0001578 | .                                 |
| 8:71674028  | 8  | 71674028  | 0.0002188 | 0.1339   | 0.0001578 | .                                 |
| rs17760831  | 8  | 71675252  | 0.0002188 | 0.1339   | 0.0001578 | .                                 |
| rs17688183  | 8  | 71675487  | 0.0002188 | 0.1339   | 0.0001578 | .                                 |
| rs62532105  | 8  | 71676562  | 0.0002188 | 0.1339   | 0.0001578 | .                                 |
| rs62532106  | 8  | 71677688  | 0.0002188 | 0.1339   | 0.0001578 | .                                 |
| rs62532107  | 8  | 71678122  | 0.0002188 | 0.1339   | 0.0001578 | .                                 |
| rs62532108  | 8  | 71679663  | 0.0002188 | 0.1339   | 0.0001578 | .                                 |
| rs7000503   | 8  | 71688332  | 0.0002188 | 0.1339   | 0.0001578 | .                                 |
| rs7851696   | 9  | 137779091 | 0.0002188 | 0.1228   | 0.0001786 | FCN2(0)                           |
| rs12864385  | 13 | 20322861  | 0.0002192 | -0.1183  | 0.0003433 | PSPC1(0)                          |
| rs7992944   | 13 | 20364909  | 0.0002194 | -0.118   | 0.0003739 | PSPC1(+7.826kb)                   |
| rs2137597   | 3  | 111421805 | 0.0002196 | -0.1342  | 0.0003185 | PLCXD2(0)                         |
| rs4769847   | 13 | 31125662  | 0.0002199 | -0.1252  | 0.0003182 | .                                 |
| 3:47556691  | 3  | 47556691  | 0.0002199 | -0.2379  | 0.0003049 | TMEM103(+1.492kb)                 |
| rs1982846   | 4  | 157349848 | 0.0002199 | -0.07799 | 0.0003823 | .                                 |
| rs482396    | 6  | 100019957 | 0.0002201 | 0.09585  | 0.0002804 | CCNC(+3.267kb)                    |
| rs485009    | 6  | 100020197 | 0.0002201 | 0.09585  | 0.0002804 | CCNC(+3.507kb)                    |
| rs179367    | 6  | 100020322 | 0.0002201 | 0.09585  | 0.0002804 | CCNC(+3.632kb)                    |
| rs12331990  | 4  | 131314946 | 0.0002204 | 0.08808  | 0.0003546 | .                                 |
| rs7277384   | 21 | 27164577  | 0.0002206 | -0.1293  | 0.0002312 | GABPA(+19.81kb)                   |
| rs12497279  | 3  | 175041503 | 0.0002207 | -0.09795 | 0.0002928 | NAALADL2(0)                       |
| rs10817537  | 9  | 116701094 | 0.0002207 | 0.07712  | 0.000608  | ZNF618(0)                         |

|             |    |           |           |          |           |                         |
|-------------|----|-----------|-----------|----------|-----------|-------------------------|
| rs7761517   | 6  | 125298340 | 0.000221  | -0.1068  | 0.0002887 | RNF217(-6.173kb)        |
| rs4993705   | 7  | 66887759  | 0.0002212 | 0.08038  | 0.0003589 | .                       |
| rs458412    | 5  | 31371262  | 0.0002213 | 0.1082   | 0.0002086 | .                       |
| rs465438    | 5  | 31371273  | 0.0002213 | 0.1082   | 0.0002086 | .                       |
| rs6054259   | 20 | 6430159   | 0.0002215 | 0.07749  | 0.0001225 | .                       |
| rs56861483  | 4  | 35591020  | 0.0002216 | -0.09987 | 0.0003712 | .                       |
| rs10149071  | 14 | 73851627  | 0.0002219 | -0.09685 | 0.0006024 | NUMB(0)                 |
| rs59339011  | 5  | 39930616  | 0.000222  | -0.105   | 0.0002588 | .                       |
| rs6909951   | 6  | 166758198 | 0.0002221 | 0.08884  | 0.0002092 | SFT2D1(+2.207kb)        |
| rs1975301   | 18 | 48102654  | 0.0002226 | 0.08574  | 0.0003704 | MAPK4(0)                |
| rs2969969   | 18 | 48102665  | 0.0002226 | 0.08574  | 0.0003704 | MAPK4(0)                |
| rs17001377  | 21 | 27167993  | 0.0002226 | -0.129   | 0.0002356 | .                       |
| rs1723652   | 7  | 109719099 | 0.0002227 | 0.09987  | 0.000197  | .                       |
| rs1446378   | 13 | 69728606  | 0.0002228 | 0.08721  | 0.0003713 | .                       |
| 1:181032603 | 1  | 181032603 | 0.0002229 | 0.1093   | 0.0005586 | MR1(+7.97kb)            |
| rs6432345   | 2  | 13042180  | 0.0002233 | -0.1491  | 0.0002582 | .                       |
| 6:110583474 | 6  | 110583474 | 0.0002233 | -0.2197  | 0.0002177 | C6orf186(0)             |
| rs6490482   | 13 | 20296553  | 0.0002234 | -0.09619 | 0.0005854 | PSPC1(0)                |
| rs8134513   | 21 | 27086916  | 0.0002237 | -0.1431  | 0.0003319 | JAM2(0) ATP5J(-9.874kb) |
| rs2579823   | 2  | 124921648 | 0.0002245 | 0.1721   | 0.0001261 | CNTNAP5(0)              |
| rs6534797   | 4  | 131349218 | 0.000225  | 0.08778  | 0.0003781 | .                       |
| rs855852    | 1  | 64351149  | 0.0002252 | 0.1583   | 0.0001187 | ROR1(0)                 |
| rs134214    | 22 | 35526635  | 0.0002253 | -0.07966 | 0.0002672 | .                       |
| rs13200647  | 6  | 99906175  | 0.0002253 | 0.09555  | 0.0002866 | USP45(0)                |
| rs12639716  | 4  | 131311210 | 0.0002254 | -0.08349 | 0.0002447 | .                       |
| rs11099050  | 4  | 131311218 | 0.0002254 | -0.08349 | 0.0002447 | .                       |
| rs10759254  | 9  | 110451637 | 0.0002255 | -0.1004  | 0.0004399 | .                       |
| rs4840055   | 6  | 99956029  | 0.0002258 | 0.09628  | 0.0002802 | USP45(0)                |
| rs2597856   | 8  | 56782960  | 0.0002259 | 0.1222   | 0.0002807 | LYN(-9.425kb)           |
| rs6944218   | 7  | 139946607 | 0.0002264 | 0.1258   | 0.0002763 | .                       |
| rs17057479  | 6  | 97619803  | 0.0002269 | -0.2837  | 0.0001035 | C6orf167(0)             |
| rs4979296   | 9  | 116671125 | 0.0002273 | -0.07697 | 0.0006531 | ZNF618(0)               |
| rs7080110   | 10 | 2178515   | 0.0002274 | 0.07561  | 0.0003229 | .                       |
| rs17051013  | 4  | 131338188 | 0.0002282 | 0.08775  | 0.000384  | .                       |
| rs8134533   | 21 | 27151711  | 0.0002287 | -0.1291  | 0.0002284 | GABPA(+6.94kb)          |
| rs10825582  | 10 | 57469270  | 0.0002289 | -0.07739 | 0.0002279 | .                       |
| rs10162678  | 15 | 26558576  | 0.0002293 | -0.1375  | 0.0005218 | .                       |
| rs4264368   | 15 | 26559326  | 0.0002293 | -0.1375  | 0.0005218 | .                       |
| rs4581350   | 10 | 57441944  | 0.0002296 | -0.07769 | 0.0002098 | .                       |
| rs2893662   | 10 | 57442289  | 0.0002296 | -0.07769 | 0.0002098 | .                       |
| rs1717775   | 11 | 30350254  | 0.0002299 | -0.09198 | 0.0002328 | C11orf46(0)             |
| rs4993700   | 7  | 66887924  | 0.00023   | 0.07928  | 0.0003464 | .                       |
| rs486881    | 6  | 100006244 | 0.0002302 | 0.09552  | 0.0002948 | CCNC(0)                 |
| rs515259    | 6  | 100007023 | 0.0002302 | 0.09552  | 0.0002948 | CCNC(0)                 |
| rs182791    | 6  | 100008089 | 0.0002302 | 0.09552  | 0.0002948 | CCNC(0)                 |
| rs330868    | 6  | 100012955 | 0.0002302 | 0.09552  | 0.0002948 | CCNC(0)                 |
| rs330872    | 6  | 100016240 | 0.0002302 | 0.09552  | 0.0002948 | CCNC(0)                 |

|             |    |           |           |          |           |                          |
|-------------|----|-----------|-----------|----------|-----------|--------------------------|
| rs559790    | 6  | 100018656 | 0.0002302 | 0.09552  | 0.0002948 | CCNC(+1.966kb)           |
| rs13230746  | 7  | 8461747   | 0.0002305 | -0.1344  | 0.0005281 | NXP1(-11.84kb)           |
| rs9551940   | 13 | 20232569  | 0.0002306 | -0.1222  | 0.000457  | MPHOSPH8(0)              |
| rs2909950   | 5  | 151886147 | 0.0002308 | -0.07883 | 0.000282  | .                        |
| rs10794867  | 10 | 2182923   | 0.000231  | 0.07598  | 0.0003119 | .                        |
| 5:117588378 | 5  | 117588378 | 0.0002311 | 0.1694   | 0.0006803 | .                        |
| rs62510685  | 8  | 71794265  | 0.0002314 | 0.1337   | 0.0001682 | .                        |
| rs9792647   | 9  | 110421778 | 0.0002321 | -0.1049  | 0.0002153 | .                        |
| rs62309562  | 4  | 131295952 | 0.0002322 | 0.08808  | 0.0004125 | .                        |
| rs846976    | 6  | 108041205 | 0.0002325 | 0.1088   | 0.0003749 | SCML4(0)                 |
| rs6913978   | 6  | 49783943  | 0.0002326 | 0.0913   | 0.000234  | CRISP1(-18.04kb)         |
| rs2493154   | 1  | 230886470 | 0.0002329 | -0.08751 | 0.0003162 | CAPN9(0)                 |
| rs8043115   | 15 | 55726752  | 0.000233  | -0.08355 | 0.0003107 | DYX1C1(0)                |
| rs16935312  | 11 | 41074546  | 0.0002332 | -0.111   | 0.0001425 | .                        |
| 4:56174453  | 4  | 56174453  | 0.0002333 | 0.1665   | 0.0002978 | .                        |
| rs10736948  | 10 | 2181683   | 0.0002336 | 0.07562  | 0.0003213 | .                        |
| rs1324876   | 10 | 9664299   | 0.0002339 | 0.07799  | 0.000199  | .                        |
| 4:17259823  | 4  | 17259823  | 0.000234  | 0.1917   | 0.0002932 | .                        |
| 5:39923085  | 5  | 39923085  | 0.0002341 | -0.1046  | 0.0002721 | .                        |
| rs12982715  | 19 | 29550537  | 0.0002346 | 0.1778   | 0.0005117 | .                        |
| rs12529982  | 6  | 169738308 | 0.0002348 | -0.1062  | 0.0003949 | .                        |
| rs7145566   | 14 | 105170221 | 0.0002349 | -0.1412  | 0.0001592 | INF2(0) C14orf151(0)     |
| rs12958595  | 18 | 7962696   | 0.0002351 | 0.08434  | 0.0002681 | PTPRM(0)                 |
| rs34877061  | 6  | 100212405 | 0.0002353 | 0.09632  | 0.0005324 | .                        |
| rs10085216  | 6  | 100265859 | 0.0002353 | 0.07791  | 0.0005553 | .                        |
| rs7120069   | 11 | 74325388  | 0.0002354 | -0.09806 | 0.0002141 | POLD3(0)                 |
| rs4840054   | 6  | 99941530  | 0.0002354 | 0.0958   | 0.0003035 | USP45(0)                 |
| 8:71544197  | 8  | 71544197  | 0.0002355 | 0.1682   | 0.0002352 | LACTB2(-5.293kb)         |
| rs1946314   | 9  | 21132495  | 0.0002355 | 0.07765  | 0.0006541 | IFNW1(-8.135kb)          |
| 21:27124132 | 21 | 27124132  | 0.0002356 | -0.1274  | 0.0002498 | GABPA(0) ATP5J(+16.17kb) |
| 21:27126409 | 21 | 27126409  | 0.0002356 | -0.1274  | 0.0002498 | GABPA(0) ATP5J(+18.44kb) |
| rs7106984   | 11 | 74369359  | 0.0002357 | -0.09806 | 0.0002058 | POLD3(+15.59kb)          |
| rs9529524   | 13 | 69730451  | 0.000236  | 0.08694  | 0.0004211 | .                        |
| rs11033086  | 11 | 35373380  | 0.0002362 | 0.07812  | 0.0002148 | SLC1A2(0)                |
| rs2290812   | 13 | 20249421  | 0.0002362 | -0.1215  | 0.0004332 | MPHOSPH8(+2.781kb)       |
| rs11154737  | 6  | 99634156  | 0.0002362 | -0.08877 | 0.0002165 | .                        |
| rs6908264   | 6  | 86053710  | 0.0002363 | 0.07813  | 0.0006807 | .                        |
| rs2224595   | 6  | 86060623  | 0.0002363 | 0.07813  | 0.0006807 | .                        |
| rs1322409   | 6  | 86061420  | 0.0002363 | 0.07813  | 0.0006807 | .                        |
| 8:71576356  | 8  | 71576356  | 0.0002364 | 0.1438   | 0.0002108 | XKR9(-5.243kb) LACTB2(0) |
| rs2210552   | 10 | 2177832   | 0.0002365 | 0.07542  | 0.0003513 | .                        |
| rs4863817   | 4  | 131354468 | 0.0002369 | 0.08415  | 0.0003393 | .                        |
| rs10978990  | 9  | 110435124 | 0.0002369 | -0.09616 | 0.0003096 | .                        |
| rs58275387  | 15 | 27323185  | 0.0002373 | 0.09542  | 0.000208  | .                        |
| rs4944916   | 11 | 74322040  | 0.0002374 | -0.09963 | 0.0001759 | POLD3(0)                 |
| rs1467859   | 22 | 22513063  | 0.0002377 | 0.1093   | 0.0003135 | .                        |
| rs59429724  | 5  | 88996335  | 0.0002377 | 0.1679   | 0.0004063 | .                        |

|             |    |           |           |          |           |                                  |
|-------------|----|-----------|-----------|----------|-----------|----------------------------------|
| rs10817532  | 9  | 116680136 | 0.0002377 | 0.07715  | 0.0006768 | ZNF618(0)                        |
| rs10482969  | 21 | 27137698  | 0.000238  | -0.1274  | 0.0002492 | GABPA(0)                         |
| rs11701994  | 21 | 27140568  | 0.000238  | -0.1274  | 0.0002492 | GABPA(0)                         |
| rs7276647   | 21 | 27141292  | 0.000238  | -0.1274  | 0.0002492 | GABPA(0)                         |
| rs11746528  | 5  | 88825558  | 0.0002382 | 0.1721   | 0.0002415 | .                                |
| 10:87897434 | 10 | 87897434  | 0.0002385 | -0.2437  | 0.0006758 | GRID1(0)                         |
| 10:87897627 | 10 | 87897627  | 0.0002385 | -0.2437  | 0.0006758 | GRID1(0)                         |
| 9:110435331 | 9  | 110435331 | 0.0002385 | -0.09577 | 0.0003199 | .                                |
| rs2046853   | 12 | 83923848  | 0.0002386 | 0.1835   | 0.0003196 | .                                |
| rs7768909   | 6  | 125283630 | 0.0002386 | -0.1074  | 0.0002702 | .                                |
| rs7753232   | 6  | 99961212  | 0.000239  | 0.09502  | 0.0002848 | USP45(0)                         |
| rs12605800  | 18 | 59701010  | 0.0002391 | 0.0896   | 0.0005875 | PIGN(-10.45kb)                   |
| rs7680687   | 4  | 54413571  | 0.0002394 | -0.09709 | 0.0001802 | LNX1(0)                          |
| rs7998125   | 13 | 99865366  | 0.0002404 | -0.1327  | 0.0003812 | UBAC2(0)                         |
| 13:99868857 | 13 | 99868857  | 0.0002404 | -0.1327  | 0.0003812 | UBAC2(0)                         |
| rs1020077   | 18 | 48122517  | 0.0002408 | -0.07816 | 0.0003266 | MAPK4(0)                         |
| rs17137597  | 15 | 27312197  | 0.0002412 | 0.09603  | 0.0001961 | .                                |
| rs4579341   | 6  | 22920427  | 0.0002414 | 0.1059   | 0.0003935 | .                                |
| rs1509436   | 4  | 131314154 | 0.0002415 | 0.0875   | 0.0003869 | .                                |
| rs1509435   | 4  | 131314574 | 0.0002415 | 0.0875   | 0.0003869 | .                                |
| rs28417249  | 4  | 131315769 | 0.0002415 | 0.0875   | 0.0003869 | .                                |
| rs28373777  | 4  | 131315922 | 0.0002415 | 0.0875   | 0.0003869 | .                                |
| rs6837274   | 4  | 131316094 | 0.0002415 | 0.0875   | 0.0003869 | .                                |
| rs6836983   | 4  | 131316199 | 0.0002415 | 0.0875   | 0.0003869 | .                                |
| rs62309570  | 4  | 131316548 | 0.0002415 | 0.0875   | 0.0003869 | .                                |
| rs10018613  | 4  | 131318368 | 0.0002415 | 0.0875   | 0.0003869 | .                                |
| rs639488    | 6  | 100003394 | 0.0002417 | 0.09516  | 0.0003063 | CCNC(0)                          |
| rs517333    | 6  | 100004086 | 0.0002417 | 0.09516  | 0.0003063 | CCNC(0)                          |
| rs9355572   | 6  | 166732650 | 0.0002417 | 0.0866   | 0.0002406 | SFT2D1(-0.865kb) PRR18(+10.78kb) |
| rs17121454  | 12 | 59159829  | 0.0002418 | 0.1985   | 0.0003783 | .                                |
| 12:59160261 | 12 | 59160261  | 0.0002418 | 0.1985   | 0.0003783 | .                                |
| 4:56165387  | 4  | 56165387  | 0.0002418 | 0.161    | 0.0004113 | .                                |
| rs7853127   | 9  | 116680692 | 0.0002419 | -0.07762 | 0.0006899 | ZNF618(0)                        |
| rs9450243   | 6  | 86051876  | 0.0002423 | 0.07804  | 0.0006884 | .                                |
| rs7030075   | 9  | 579035    | 0.0002423 | 0.08736  | 0.0004338 | KANK1(0)                         |
| rs6918901   | 6  | 166734193 | 0.0002424 | 0.08653  | 0.0002438 | SFT2D1(0) PRR18(+12.32kb)        |
| rs7787388   | 7  | 139948026 | 0.0002425 | 0.1246   | 0.0003033 | .                                |
| rs35164807  | 13 | 20376612  | 0.0002426 | -0.1177  | 0.0003707 | PSPC1(+19.53kb)                  |
| rs35420795  | 13 | 20379929  | 0.0002426 | -0.1177  | 0.0003707 | .                                |
| rs58019386  | 8  | 71704286  | 0.0002426 | 0.132    | 0.0001871 | .                                |
| rs62508810  | 8  | 71704914  | 0.0002426 | 0.132    | 0.0001871 | .                                |
| rs6991276   | 8  | 71799384  | 0.0002426 | 0.1423   | 0.0002137 | .                                |
| rs11201892  | 10 | 87888332  | 0.0002429 | -0.2437  | 0.0006676 | GRID1(0)                         |
| rs13128571  | 4  | 36091844  | 0.0002429 | 0.1219   | 0.000589  | CENTD1(0)                        |
| rs3754494   | 1  | 171153364 | 0.000243  | 0.07773  | 0.0001422 | FMO2(-1.023kb)                   |
| 6:101417004 | 6  | 101417004 | 0.000243  | 0.196    | 0.0002993 | .                                |
| rs6913140   | 6  | 110197907 | 0.0002432 | -0.07455 | 0.000309  | .                                |

|             |    |           |           |          |           |                                  |
|-------------|----|-----------|-----------|----------|-----------|----------------------------------|
| rs4769903   | 13 | 20338643  | 0.0002433 | -0.1176  | 0.0003746 | PSPC1(0)                         |
| rs59718907  | 21 | 27951277  | 0.0002434 | 0.1181   | 0.0002408 | CYYR1(+5.696kb)                  |
| rs7919961   | 10 | 93037824  | 0.0002437 | 0.1725   | 0.0003583 | PCGF5(0)                         |
| 13:20412611 | 13 | 20412611  | 0.0002439 | -0.1163  | 0.0004018 | ZMYM5(0)                         |
| rs4148189   | 2  | 44047530  | 0.0002439 | 0.1149   | 0.0002245 | DYNC2L1(+10.38kb) ABCG8(-18.57k  |
| rs9321565   | 6  | 99943328  | 0.0002442 | 0.09566  | 0.0003052 | USP45(0)                         |
| rs9321566   | 6  | 99943332  | 0.0002442 | 0.09566  | 0.0003052 | USP45(0)                         |
| rs7545923   | 1  | 171148721 | 0.0002446 | 0.07775  | 0.0001414 | FMO2(-5.666kb)                   |
| rs3783037   | 13 | 20436598  | 0.0002448 | -0.1168  | 0.0004027 | ZMYM5(0)                         |
| 15:27313978 | 15 | 27313978  | 0.0002449 | 0.09625  | 0.0001868 | .                                |
| 15:27314032 | 15 | 27314032  | 0.0002449 | 0.09625  | 0.0001868 | .                                |
| rs1433969   | 11 | 74278433  | 0.000245  | -0.1009  | 0.0001701 | .                                |
| rs736617    | 18 | 48117216  | 0.000245  | -0.0781  | 0.0003376 | MAPK4(0)                         |
| rs13103457  | 4  | 36091915  | 0.000245  | 0.1213   | 0.0005061 | CENTD1(0)                        |
| rs2278938   | 4  | 186836629 | 0.0002452 | 0.07764  | 0.0002584 | SORBS2(0)                        |
| rs7910223   | 10 | 2179721   | 0.0002453 | 0.07558  | 0.0003245 | .                                |
| rs6570130   | 6  | 99970055  | 0.0002454 | 0.09522  | 0.0002973 | USP45(+6.803kb)                  |
| rs4945840   | 6  | 110193742 | 0.0002457 | -0.07449 | 0.0003487 | .                                |
| rs7111273   | 11 | 74370231  | 0.0002461 | -0.09803 | 0.0002183 | POLD3(+16.47kb)                  |
| rs2236410   | 1  | 181018236 | 0.0002464 | 0.1139   | 0.0005834 | MR1(0)                           |
| rs11743866  | 5  | 88826167  | 0.000247  | 0.1716   | 0.00025   | .                                |
| rs11747610  | 5  | 88826811  | 0.000247  | 0.1716   | 0.00025   | .                                |
| rs6592568   | 11 | 74275894  | 0.0002471 | -0.1011  | 0.0001697 | .                                |
| rs4627114   | 11 | 74299818  | 0.0002472 | -0.09855 | 0.0002078 | POLD3(-3.81kb)                   |
| rs28411052  | 4  | 131313785 | 0.0002472 | 0.08741  | 0.0003961 | .                                |
| rs7942698   | 11 | 35363078  | 0.0002473 | 0.07762  | 0.00023   | SLC1A2(0)                        |
| rs2183360   | 9  | 110462650 | 0.0002473 | 0.07759  | 0.0003123 | .                                |
| rs1023228   | 13 | 20260800  | 0.0002475 | -0.1198  | 0.0004573 | PSPC1(-16.21kb) MPHOSPH8(+14.16k |
| rs2685480   | 10 | 110622053 | 0.0002476 | 0.08145  | 0.0003588 | .                                |
| rs1004046   | 19 | 30992639  | 0.0002481 | -0.08909 | 0.0000992 | ZNF536(0)                        |
| rs4418226   | 6  | 110196011 | 0.0002481 | -0.07402 | 0.0003336 | .                                |
| rs4418227   | 6  | 110196025 | 0.0002481 | -0.07402 | 0.0003336 | .                                |
| 7:113537793 | 7  | 113537793 | 0.0002482 | 0.2063   | 0.000486  | PPP1R3A(0)                       |
| rs7720486   | 5  | 88989352  | 0.0002487 | 0.1677   | 0.0004103 | .                                |
| rs2029108   | 5  | 88990017  | 0.0002487 | 0.1677   | 0.0004103 | .                                |
| rs12211254  | 6  | 99928694  | 0.0002487 | 0.09509  | 0.0002868 | USP45(0)                         |
| rs12211598  | 6  | 99929263  | 0.0002487 | 0.09509  | 0.0002868 | USP45(0)                         |
| rs6934517   | 6  | 99934104  | 0.0002487 | 0.09509  | 0.0002868 | USP45(0)                         |
| rs6940360   | 6  | 99934940  | 0.0002487 | 0.09509  | 0.0002868 | USP45(0)                         |
| rs2181687   | 6  | 99935975  | 0.0002487 | 0.09509  | 0.0002868 | USP45(0)                         |
| rs4840053   | 6  | 99938929  | 0.0002487 | 0.09509  | 0.0002868 | USP45(0)                         |
| 5:88994955  | 5  | 88994955  | 0.0002489 | 0.1677   | 0.0004096 | .                                |
| rs4357374   | 9  | 85495552  | 0.0002489 | -0.07723 | 0.000616  | .                                |
| rs10141031  | 14 | 73773609  | 0.000249  | -0.09824 | 0.0006547 | NUMB(0)                          |
| rs5757121   | 22 | 22514162  | 0.0002491 | 0.1093   | 0.0003414 | .                                |
| 8:71766667  | 8  | 71766667  | 0.0002501 | 0.1409   | 0.0001988 | .                                |
| rs519721    | 6  | 100003307 | 0.0002503 | 0.09489  | 0.0003139 | CCNC(0)                          |

|             |    |           |           |          |           |                                  |
|-------------|----|-----------|-----------|----------|-----------|----------------------------------|
| rs55971068  | 8  | 71571057  | 0.0002503 | 0.1434   | 0.0001979 | XKR9(-10.54kb) LACTB2(0)         |
| rs10516188  | 4  | 7778623   | 0.0002508 | 0.1292   | 0.0004572 | AFAP1(0)                         |
| rs9356476   | 6  | 166730499 | 0.0002515 | 0.08924  | 0.0002589 | SFT2D1(-3.016kb) PRR18(+8.628kb) |
| rs4896619   | 6  | 125281126 | 0.0002518 | -0.1061  | 0.0002718 | .                                |
| rs7336522   | 13 | 99844521  | 0.0002524 | -0.1328  | 0.0004129 | UBAC2(-8.641kb)                  |
| rs7336659   | 13 | 99844541  | 0.0002524 | -0.1328  | 0.0004129 | UBAC2(-8.621kb)                  |
| rs4769071   | 13 | 20351548  | 0.0002526 | -0.09566 | 0.0006205 | PSPC1(0)                         |
| 8:13657068  | 8  | 13657068  | 0.0002534 | 0.2425   | 0.0002295 | .                                |
| 15:26552334 | 15 | 26552334  | 0.0002535 | -0.1503  | 0.0008814 | .                                |
| rs350026    | 5  | 40183268  | 0.0002539 | -0.1092  | 0.0003828 | .                                |
| rs1981695   | 11 | 22924004  | 0.0002541 | -0.09798 | 0.0003196 | .                                |
| rs7991143   | 13 | 99797929  | 0.0002542 | -0.1338  | 0.0003507 | .                                |
| rs1334421   | 6  | 125290718 | 0.0002543 | -0.107   | 0.0003323 | RNF217(-13.79kb)                 |
| rs2493153   | 1  | 230886191 | 0.0002545 | -0.0874  | 0.0003447 | CAPN9(0)                         |
| rs8093819   | 18 | 59698876  | 0.0002548 | 0.08953  | 0.0006837 | PIGN(-12.58kb)                   |
| 13:99807710 | 13 | 99807710  | 0.0002549 | -0.1364  | 0.0003629 | .                                |
| rs857614    | 6  | 100074901 | 0.0002549 | 0.09243  | 0.0004602 | PRDM13(+11.45kb)                 |
| rs4944056   | 11 | 74368420  | 0.0002551 | -0.09761 | 0.000218  | POLD3(+14.65kb)                  |
| rs4944930   | 11 | 74368441  | 0.0002551 | -0.09761 | 0.000218  | POLD3(+14.68kb)                  |
| rs7126957   | 11 | 74369375  | 0.0002551 | -0.09761 | 0.000218  | POLD3(+15.61kb)                  |
| 18:57425892 | 18 | 57425892  | 0.0002552 | -0.2961  | 0.0004619 | .                                |
| 4:149452717 | 4  | 149452717 | 0.0002552 | 0.1483   | 0.0002204 | .                                |
| rs928265    | 21 | 27121792  | 0.0002553 | -0.1262  | 0.0002666 | GABPA(0) ATP5J(+13.83kb)         |
| rs6908689   | 6  | 99665546  | 0.0002556 | -0.08865 | 0.00022   | .                                |
| rs927354    | 9  | 85477598  | 0.0002556 | -0.07738 | 0.0006463 | .                                |
| rs7852839   | 9  | 85479683  | 0.0002556 | -0.07738 | 0.0006463 | .                                |
| rs8128535   | 21 | 27122451  | 0.0002557 | -0.1267  | 0.000273  | GABPA(0) ATP5J(+14.49kb)         |
| 6:100212668 | 6  | 100212668 | 0.0002557 | 0.09558  | 0.0006293 | .                                |
| rs5757106   | 22 | 22511467  | 0.0002561 | 0.1089   | 0.0003641 | .                                |
| rs9806268   | 15 | 55762530  | 0.0002562 | -0.08428 | 0.0002837 | DYX1C1(0)                        |
| 11:22931393 | 11 | 22931393  | 0.0002563 | -0.0979  | 0.0003174 | .                                |
| rs7707481   | 5  | 88999109  | 0.0002564 | 0.1674   | 0.0004193 | .                                |
| rs12290536  | 11 | 133459873 | 0.0002568 | -0.0979  | 0.0005671 | .                                |
| rs7122810   | 11 | 74360635  | 0.000257  | -0.09711 | 0.0002329 | POLD3(+6.87kb)                   |
| rs4944928   | 11 | 74367587  | 0.000257  | -0.09777 | 0.0002328 | POLD3(+13.82kb)                  |
| rs10496376  | 2  | 104593478 | 0.0002571 | -0.09873 | 0.0007237 | .                                |
| rs1381817   | 2  | 20179220  | 0.0002572 | -0.1354  | 0.0004111 | WDR35(0) MATN3(-12.59kb)         |
| rs10763247  | 10 | 57482438  | 0.0002573 | -0.07668 | 0.0002546 | .                                |
| rs8000172   | 13 | 20374851  | 0.0002575 | -0.1172  | 0.0003984 | PSPC1(+17.77kb)                  |
| rs9506383   | 13 | 20384447  | 0.0002575 | -0.1172  | 0.0003984 | .                                |
| rs2720262   | 3  | 127315788 | 0.0002577 | 0.07649  | 0.000215  | MCM2(-1.464kb) GPR175(+16.51kb)  |
| rs6464620   | 7  | 139945539 | 0.0002577 | 0.1245   | 0.0003226 | .                                |
| rs733296    | 11 | 22936579  | 0.0002579 | -0.09817 | 0.0002897 | .                                |
| rs6510166   | 19 | 31036994  | 0.000258  | -0.09634 | 0.0001536 | ZNF536(0)                        |
| rs2829903   | 21 | 27140758  | 0.0002583 | -0.1267  | 0.0002725 | GABPA(0)                         |
| rs6820240   | 4  | 131308861 | 0.0002583 | 0.08718  | 0.0004386 | .                                |
| rs12875931  | 13 | 37199316  | 0.0002592 | 0.1034   | 0.000126  | .                                |

|             |    |           |           |          |           |                                  |
|-------------|----|-----------|-----------|----------|-----------|----------------------------------|
| rs17074718  | 13 | 31131615  | 0.0002594 | -0.1256  | 0.0003852 | .                                |
| rs4860998   | 4  | 41619643  | 0.0002597 | -0.088   | 0.0002524 | LIMCH1(0)                        |
| rs34839608  | 8  | 14413843  | 0.0002597 | -0.1067  | 0.0005045 | SGCZ(0)                          |
| rs1544102   | 9  | 116723488 | 0.0002598 | 0.07702  | 0.0007258 | ZNF618(0)                        |
| 4:56163563  | 4  | 56163563  | 0.0002601 | 0.1548   | 0.0004372 | .                                |
| rs10905591  | 10 | 9662979   | 0.0002602 | 0.07722  | 0.0002242 | .                                |
| rs10794865  | 10 | 2182120   | 0.0002605 | 0.07516  | 0.0003437 | .                                |
| 11:22984279 | 11 | 22984279  | 0.0002609 | -0.0977  | 0.0003023 | .                                |
| rs58263911  | 7  | 139948484 | 0.0002609 | 0.1287   | 0.0003751 | .                                |
| rs2817973   | 6  | 121169133 | 0.000261  | 0.165    | 0.0006311 | .                                |
| rs6054251   | 20 | 6427132   | 0.0002612 | 0.07667  | 0.0001563 | .                                |
| rs6569406   | 6  | 125285123 | 0.0002612 | -0.1065  | 0.0002967 | RNF217(-19.39kb)                 |
| rs34631183  | 7  | 66888875  | 0.0002612 | 0.07844  | 0.0003799 | .                                |
| rs4994698   | 7  | 66889564  | 0.0002613 | 0.07877  | 0.0003567 | .                                |
| rs4994697   | 7  | 66889594  | 0.0002613 | 0.07877  | 0.0003567 | .                                |
| rs59091915  | 7  | 66889838  | 0.0002613 | 0.07877  | 0.0003567 | .                                |
| rs58259719  | 7  | 66889885  | 0.0002613 | 0.07877  | 0.0003567 | .                                |
| rs80731     | 22 | 35526571  | 0.0002614 | -0.07826 | 0.0002821 | .                                |
| rs11676226  | 2  | 236514769 | 0.0002615 | -0.0777  | 0.0001809 | CENTG2(0)                        |
| rs10816543  | 9  | 110422723 | 0.0002616 | -0.1034  | 0.000212  | .                                |
| 7:36583690  | 7  | 36583690  | 0.0002622 | 0.1313   | 0.0004017 | AOAH(0)                          |
| rs7327482   | 13 | 20290126  | 0.0002624 | -0.1161  | 0.0003877 | PSPC1(0)                         |
| rs10506328  | 12 | 54687232  | 0.0002625 | -0.0776  | 0.0003338 | NFE2(0) HNRNPA1(+8.202kb) CBX5(+ |
| 4:56162868  | 4  | 56162868  | 0.0002629 | 0.1545   | 0.0004473 | .                                |
| 4:56162958  | 4  | 56162958  | 0.0002629 | 0.1545   | 0.0004473 | .                                |
| 4:56163024  | 4  | 56163024  | 0.0002629 | 0.1545   | 0.0004473 | .                                |
| 4:56163163  | 4  | 56163163  | 0.0002629 | 0.1545   | 0.0004473 | .                                |
| 4:56163391  | 4  | 56163391  | 0.0002629 | 0.1545   | 0.0004473 | .                                |
| 18:67894387 | 18 | 67894387  | 0.0002632 | -0.268   | 0.0004916 | .                                |
| rs3855369   | 18 | 48131043  | 0.0002633 | -0.07794 | 0.0002809 | MAPK4(0)                         |
| rs12783538  | 10 | 129220313 | 0.0002636 | 0.08625  | 0.0003015 | .                                |
| rs4766273   | 12 | 4789554   | 0.0002649 | -0.101   | 0.0001708 | NDUFA9(0)                        |
| rs11667331  | 19 | 31050571  | 0.0002652 | -0.108   | 0.0002072 | ZNF536(+1.606kb)                 |
| 3:119113018 | 3  | 119113018 | 0.0002652 | -0.1468  | 0.0002277 | CDGAP(0)                         |
| rs9400344   | 6  | 110241059 | 0.0002657 | 0.07992  | 0.0003898 | .                                |
| rs11154741  | 6  | 99638145  | 0.0002658 | -0.08805 | 0.0002442 | .                                |
| rs1176713   | 11 | 113860425 | 0.0002659 | -0.09208 | 0.0006671 | HTR3A(0)                         |
| rs10964844  | 9  | 21112443  | 0.0002662 | -0.07552 | 0.000939  | .                                |
| rs512074    | 5  | 39867480  | 0.0002664 | -0.09836 | 0.0003166 | .                                |
| rs11625294  | 14 | 36073568  | 0.0002668 | -0.08274 | 0.0004273 | GARNL1(0)                        |
| rs6905366   | 6  | 49771994  | 0.0002675 | 0.08534  | 0.0003581 | PGK2(+16.99kb)                   |
| rs10763222  | 10 | 57427515  | 0.0002676 | -0.07631 | 0.0002368 | .                                |
| rs994198    | 6  | 99960761  | 0.0002678 | 0.09437  | 0.0003141 | USP45(0)                         |
| rs11033087  | 11 | 35374044  | 0.0002683 | 0.07752  | 0.0002456 | SLC1A2(0)                        |
| rs9508907   | 13 | 20398669  | 0.0002684 | -0.1165  | 0.0004406 | ZMYM5(-12.92kb)                  |
| rs2926707   | 8  | 71164680  | 0.0002689 | 0.08304  | 0.0005077 | NCOA2(0)                         |
| rs10925958  | 1  | 235707557 | 0.0002691 | -0.1263  | 0.0005756 | GNG4(-3.427kb)                   |



|             |    |           |           |          |           |                                  |
|-------------|----|-----------|-----------|----------|-----------|----------------------------------|
| rs36014569  | 6  | 110199837 | 0.0002691 | -0.07467 | 0.0003272 | .                                |
| rs5750612   | 22 | 22512799  | 0.0002692 | 0.1101   | 0.0003621 | .                                |
| 12:59162199 | 12 | 59162199  | 0.0002693 | 0.1967   | 0.0004306 | .                                |
| rs10816544  | 9  | 110422729 | 0.0002693 | -0.1033  | 0.0002157 | .                                |
| rs28864543  | 13 | 20186541  | 0.0002696 | -0.1236  | 0.0004686 | .                                |
| rs12220954  | 10 | 57460136  | 0.0002698 | -0.07743 | 0.0002893 | .                                |
| rs45624832  | 21 | 27117879  | 0.0002698 | -0.1264  | 0.0002809 | GABPA(0) ATP5J(+9.914kb)         |
| rs3787617   | 21 | 27120394  | 0.0002698 | -0.1264  | 0.0002809 | GABPA(0) ATP5J(+12.43kb)         |
| rs9592729   | 13 | 71053426  | 0.0002702 | 0.09897  | 0.0002154 | .                                |
| 5:155310375 | 5  | 155310375 | 0.0002705 | 0.0966   | 0.0005294 | .                                |
| rs4074579   | 11 | 133454992 | 0.0002706 | -0.09819 | 0.0005471 | .                                |
| rs1225141   | 11 | 76553850  | 0.0002706 | 0.08866  | 0.000716  | PHCA(-18.07kb)                   |
| 11:4965398  | 11 | 4965398   | 0.0002707 | -0.1216  | 0.0006354 | OR51G1(+19.83kb) OR51A2(-10.6kb) |
| rs9315078   | 13 | 20258452  | 0.0002707 | -0.09357 | 0.0006955 | PSPC1(-18.56kb) MPHOSPH8(+11.81k |
| rs28630954  | 7  | 109735910 | 0.0002708 | 0.0988   | 0.0002193 | .                                |
| 8:71839252  | 8  | 71839252  | 0.000271  | 0.1319   | 0.0002003 | .                                |
| rs7522210   | 1  | 161927179 | 0.0002716 | 0.08412  | 0.0007222 | ATF6(0)                          |
| rs10267775  | 7  | 130935899 | 0.0002716 | 0.1241   | 0.0000448 | .                                |
| rs2329648   | 5  | 27571144  | 0.0002717 | 0.08007  | 0.0002641 | .                                |
| rs1989656   | 1  | 171212234 | 0.0002718 | 0.07718  | 0.000177  | FMO1(-5.428kb)                   |
| 19:31012711 | 19 | 31012711  | 0.0002722 | -0.1108  | 0.0003885 | ZNF536(0)                        |
| rs6564273   | 16 | 73529777  | 0.0002723 | 0.09566  | 0.0006956 | .                                |
| rs6824231   | 4  | 7776112   | 0.0002724 | 0.1285   | 0.0004907 | AFAP1(0)                         |
| rs35430913  | 6  | 99925555  | 0.0002726 | 0.09458  | 0.0003123 | USP45(0)                         |
| rs6054252   | 20 | 6427177   | 0.0002728 | 0.0764   | 0.0001563 | .                                |
| rs6054253   | 20 | 6427241   | 0.0002728 | 0.0764   | 0.0001563 | .                                |
| rs1222215   | 11 | 30347596  | 0.0002729 | -0.08966 | 0.0002492 | C11orf46(0)                      |
| rs1222214   | 11 | 30347695  | 0.0002729 | -0.08966 | 0.0002492 | C11orf46(0)                      |
| rs12153117  | 5  | 88976540  | 0.0002732 | 0.1642   | 0.0004383 | .                                |
| rs34193534  | 5  | 88979374  | 0.0002732 | 0.1642   | 0.0004383 | .                                |
| rs11931974  | 4  | 131309071 | 0.0002733 | 0.0868   | 0.0004457 | .                                |
| rs6826386   | 4  | 131309817 | 0.0002733 | 0.0868   | 0.0004457 | .                                |
| rs61952881  | 13 | 69725744  | 0.0002734 | 0.08598  | 0.0004343 | .                                |
| rs10031236  | 4  | 190298297 | 0.0002735 | 0.131    | 0.0001688 | .                                |
| rs34886587  | 8  | 19119886  | 0.0002737 | -0.2327  | 0.0004291 | .                                |
| rs2672263   | 8  | 19120228  | 0.0002737 | -0.2327  | 0.0004291 | .                                |
| rs2683318   | 8  | 19120584  | 0.0002737 | -0.2327  | 0.0004291 | .                                |
| rs2791447   | 9  | 18393091  | 0.0002738 | -0.1058  | 0.0004009 | .                                |
| rs10499025  | 6  | 99925771  | 0.0002739 | 0.09475  | 0.0003114 | USP45(0)                         |
| rs1848884   | 8  | 14415171  | 0.0002739 | -0.1063  | 0.0005292 | SGCZ(0)                          |
| rs9508908   | 13 | 20398742  | 0.0002744 | -0.1158  | 0.0004496 | ZMYM5(-12.85kb)                  |
| rs7665114   | 4  | 157348672 | 0.0002747 | -0.07652 | 0.000473  | .                                |
| rs10004875  | 4  | 157350076 | 0.0002747 | -0.07652 | 0.000473  | .                                |
| rs10816556  | 9  | 110451579 | 0.0002749 | -0.09912 | 0.000541  | .                                |
| rs7318682   | 13 | 20266130  | 0.0002753 | -0.09401 | 0.0007073 | PSPC1(-10.88kb) MPHOSPH8(+19.49k |
| rs12520720  | 5  | 127137471 | 0.0002753 | 0.2664   | 0.0006009 | .                                |
| rs7330584   | 13 | 20352275  | 0.0002758 | -0.09557 | 0.0006183 | PSPC1(0)                         |

|             |    |           |           |          |           |                                  |
|-------------|----|-----------|-----------|----------|-----------|----------------------------------|
| rs9541789   | 13 | 69722212  | 0.0002761 | 0.08574  | 0.0004509 | .                                |
| rs9529519   | 13 | 69722321  | 0.0002761 | 0.08574  | 0.0004509 | .                                |
| rs9529520   | 13 | 69722692  | 0.0002761 | 0.08574  | 0.0004509 | .                                |
| rs9599423   | 13 | 69725358  | 0.0002761 | 0.08574  | 0.0004509 | .                                |
| rs1446379   | 13 | 69728322  | 0.0002761 | 0.08574  | 0.0004509 | .                                |
| rs10835647  | 11 | 30313268  | 0.0002763 | -0.08934 | 0.000247  | .                                |
| rs9868702   | 3  | 84296838  | 0.0002769 | -0.155   | 0.000459  | .                                |
| rs7083717   | 10 | 57438407  | 0.0002771 | -0.07584 | 0.0002889 | .                                |
| rs2392950   | 10 | 57439145  | 0.0002771 | -0.07584 | 0.0002889 | .                                |
| rs1916511   | 10 | 57439327  | 0.0002771 | -0.07584 | 0.0002889 | .                                |
| rs11004962  | 10 | 57439589  | 0.0002771 | -0.07584 | 0.0002889 | .                                |
| rs1916509   | 10 | 57439612  | 0.0002771 | -0.07584 | 0.0002889 | .                                |
| rs57808867  | 5  | 127120041 | 0.0002771 | 0.2662   | 0.0006084 | .                                |
| rs7729470   | 5  | 127130881 | 0.0002771 | 0.2662   | 0.0006084 | .                                |
| rs9401790   | 6  | 125284457 | 0.0002771 | -0.106   | 0.000312  | .                                |
| rs5757114   | 22 | 22512324  | 0.0002772 | 0.1081   | 0.0003617 | .                                |
| rs11004952  | 10 | 57424125  | 0.0002773 | -0.07668 | 0.0003181 | .                                |
| rs17417266  | 2  | 104643706 | 0.0002773 | -0.1419  | 0.0005177 | .                                |
| rs10763228  | 10 | 57441026  | 0.0002774 | -0.07585 | 0.0002883 | .                                |
| rs10480737  | 7  | 79168005  | 0.0002775 | -0.1582  | 0.0004825 | .                                |
| rs9550588   | 13 | 20309195  | 0.0002777 | -0.1153  | 0.0004528 | PSPC1(0)                         |
| 5:34930218  | 5  | 34930218  | 0.0002778 | 0.1483   | 0.0001533 | RAD1(+11.84kb) DNAJC21(0) BXDC2( |
| 1:171162794 | 1  | 171162794 | 0.0002779 | 0.2297   | 0.0002596 | FMO2(0)                          |
| rs4979297   | 9  | 116684219 | 0.000278  | -0.07606 | 0.0007218 | ZNF618(0)                        |
| rs17020634  | 1  | 207273957 | 0.0002782 | 0.1723   | 0.0003473 | PFKFB2(+19.59kb) C4BPA(-3.649kb) |
| rs16893569  | 4  | 16511902  | 0.0002784 | 0.07949  | 0.0004773 | LDB2(0)                          |
| rs2630213   | 3  | 127333832 | 0.0002786 | 0.07522  | 0.0002124 | PODXL2(-14.21kb) MCM2(0)         |
| rs11945491  | 4  | 131309181 | 0.0002792 | 0.08733  | 0.0004511 | .                                |
| 7:101721548 | 7  | 101721548 | 0.0002794 | 0.2157   | 0.0003333 | CUX1(0)                          |
| rs10122390  | 9  | 116685785 | 0.0002794 | -0.07606 | 0.0007218 | ZNF618(0)                        |
| rs62309567  | 4  | 131307210 | 0.0002799 | 0.08671  | 0.0004758 | .                                |
| rs1608842   | 7  | 109717196 | 0.0002803 | 0.09807  | 0.0002443 | .                                |
| rs34846444  | 8  | 19120978  | 0.0002804 | -0.2323  | 0.0004389 | .                                |
| rs973083    | 5  | 40017052  | 0.0002807 | -0.1067  | 0.0003206 | .                                |
| rs56264929  | 10 | 57467168  | 0.0002809 | -0.07609 | 0.0002782 | .                                |
| rs909411    | 11 | 113854282 | 0.0002809 | -0.09112 | 0.0007311 | HTR3A(0)                         |
| rs9552014   | 13 | 20417033  | 0.0002812 | -0.1152  | 0.0004608 | ZMYM5(0)                         |
| rs9508913   | 13 | 20418854  | 0.0002812 | -0.1152  | 0.0004608 | ZMYM5(0)                         |
| rs4343122   | 13 | 20419029  | 0.0002812 | -0.1152  | 0.0004608 | ZMYM5(0)                         |
| rs35634189  | 13 | 20425150  | 0.0002812 | -0.1152  | 0.0004608 | ZMYM5(0)                         |
| rs9552018   | 13 | 20427424  | 0.0002812 | -0.1152  | 0.0004608 | ZMYM5(0)                         |
| rs12659482  | 5  | 27490785  | 0.0002812 | 0.07858  | 0.0003607 | .                                |
| rs940288    | 9  | 110436996 | 0.0002812 | 0.07684  | 0.0004176 | .                                |
| 21:39022344 | 21 | 39022344  | 0.0002816 | -0.1527  | 0.0004122 | KCNJ6(0)                         |
| rs12196981  | 6  | 99624196  | 0.0002817 | -0.08769 | 0.0002699 | .                                |
| rs330812    | 6  | 100000485 | 0.0002818 | 0.09414  | 0.0003546 | CCNC(0)                          |
| rs56149507  | 7  | 66890130  | 0.0002818 | 0.07839  | 0.0003887 | .                                |

|             |    |           |           |          |           |                  |
|-------------|----|-----------|-----------|----------|-----------|------------------|
| rs1861178   | 12 | 4303153   | 0.0002819 | -0.07749 | 0.0005939 | .                |
| rs2340312   | 13 | 20363901  | 0.0002821 | -0.09507 | 0.0006818 | PSPC1(+6.818kb)  |
| rs7745109   | 6  | 86062044  | 0.0002822 | 0.07802  | 0.0007704 | .                |
| rs10805090  | 4  | 41620242  | 0.0002823 | -0.08795 | 0.0002943 | LIMCH1(0)        |
| rs28561916  | 5  | 88809922  | 0.0002824 | 0.1691   | 0.0002982 | .                |
| rs16907792  | 10 | 57501054  | 0.0002828 | -0.07598 | 0.0002874 | .                |
| rs4804923   | 19 | 30756032  | 0.0002829 | -0.07603 | 0.0002254 | .                |
| rs13017171  | 2  | 217761150 | 0.0002829 | 0.1796   | 0.0003988 | .                |
| rs12870127  | 13 | 20322965  | 0.0002831 | -0.1164  | 0.0004444 | PSPC1(0)         |
| rs1862553   | 5  | 39904018  | 0.0002832 | -0.1034  | 0.0003271 | .                |
| rs9550589   | 13 | 20310251  | 0.0002836 | -0.1153  | 0.0004531 | PSPC1(0)         |
| rs9552009   | 13 | 20397908  | 0.0002837 | -0.1155  | 0.000463  | ZMYM5(-13.68kb)  |
| rs10513566  | 3  | 161216244 | 0.0002838 | 0.1958   | 0.0004922 | OTOL1(0)         |
| rs2269877   | 4  | 7780712   | 0.0002838 | 0.1284   | 0.0005315 | AFAP1(0)         |
| rs55722533  | 5  | 14024848  | 0.0002846 | -0.07935 | 0.0001682 | .                |
| rs6926881   | 6  | 99953624  | 0.0002847 | 0.09492  | 0.000362  | USP45(0)         |
| rs9376234   | 6  | 99954574  | 0.0002847 | 0.09492  | 0.000362  | USP45(0)         |
| 2:142779806 | 2  | 142779806 | 0.000285  | 0.1858   | 0.0001462 | LRP1B(0)         |
| rs28384820  | 1  | 171218948 | 0.0002851 | 0.2316   | 0.000263  | FMO1(0)          |
| rs7097526   | 10 | 129221607 | 0.0002857 | 0.08549  | 0.0003327 | .                |
| rs7248666   | 19 | 35963194  | 0.0002858 | 0.09114  | 0.0006776 | KRTDAP(-15.03kb) |
| rs7546351   | 1  | 230884264 | 0.0002864 | -0.08631 | 0.0003975 | CAPN9(0)         |
| rs10740625  | 10 | 57483653  | 0.0002864 | -0.07571 | 0.0002842 | .                |
| rs2397339   | 6  | 99940614  | 0.0002867 | 0.09451  | 0.0003616 | USP45(0)         |
| rs35199078  | 13 | 20301342  | 0.0002882 | -0.1155  | 0.0004604 | PSPC1(0)         |
| rs11948589  | 5  | 27544770  | 0.0002882 | 0.07783  | 0.0003511 | .                |
| rs6927027   | 6  | 101402597 | 0.0002882 | 0.1316   | 0.0004498 | .                |
| rs10903682  | 10 | 2175664   | 0.0002884 | 0.07464  | 0.0003778 | .                |
| 10:87904849 | 10 | 87904849  | 0.0002885 | -0.2417  | 0.0008466 | GRID1(0)         |
| rs12358799  | 10 | 87906206  | 0.0002885 | -0.2417  | 0.0008466 | GRID1(0)         |
| 10:87907340 | 10 | 87907340  | 0.0002885 | -0.2417  | 0.0008466 | GRID1(0)         |
| rs7947345   | 11 | 74354227  | 0.0002886 | -0.09763 | 0.0002406 | POLD3(+0.462kb)  |
| rs10942259  | 5  | 27547377  | 0.0002886 | 0.07808  | 0.0003371 | .                |
| rs62309568  | 4  | 131315579 | 0.0002887 | 0.08665  | 0.0005255 | .                |
| rs7822173   | 8  | 71829423  | 0.0002889 | 0.1299   | 0.0002762 | .                |
| rs1916498   | 10 | 57462870  | 0.0002894 | -0.07654 | 0.0002795 | .                |
| rs35468298  | 11 | 133390269 | 0.0002896 | 0.1002   | 0.0008617 | OPCML(0)         |
| rs10050334  | 4  | 131337430 | 0.0002896 | 0.08239  | 0.0003833 | .                |
| rs2859767   | 9  | 18394317  | 0.0002897 | -0.1031  | 0.0004452 | .                |
| rs10825569  | 10 | 57450873  | 0.00029   | -0.07586 | 0.000284  | .                |
| rs2905237   | 7  | 113377065 | 0.0002903 | 0.1776   | 0.000619  | .                |
| 10:87911800 | 10 | 87911800  | 0.0002905 | -0.2416  | 0.0008515 | GRID1(0)         |
| rs11004977  | 10 | 57462159  | 0.0002909 | -0.07686 | 0.0002925 | .                |
| rs914136    | 21 | 30848368  | 0.0002909 | 0.3245   | 0.0005998 | .                |
| rs4864977   | 4  | 56160599  | 0.0002909 | 0.1073   | 0.0006739 | .                |
| rs35172002  | 5  | 27476777  | 0.0002913 | 0.07877  | 0.000262  | .                |
| rs7001707   | 8  | 71229377  | 0.0002916 | 0.08878  | 0.0005363 | NCOA2(0)         |

|             |    |           |           |          |           |                                   |
|-------------|----|-----------|-----------|----------|-----------|-----------------------------------|
| 21:27111913 | 21 | 27111913  | 0.0002918 | -0.1262  | 0.0003036 | GABPA(0) ATP5J(+3.948kb)          |
| rs28630021  | 4  | 131315854 | 0.0002922 | 0.08746  | 0.0004445 | .                                 |
| rs28647934  | 4  | 131315862 | 0.0002922 | 0.08746  | 0.0004445 | .                                 |
| rs6832034   | 4  | 157347239 | 0.0002922 | -0.07635 | 0.0005091 | .                                 |
| rs7689943   | 4  | 157350669 | 0.0002923 | -0.07618 | 0.0005053 | .                                 |
| rs6819662   | 4  | 56161536  | 0.0002923 | 0.1535   | 0.0004922 | .                                 |
| rs10938153  | 4  | 41612137  | 0.0002926 | -0.08654 | 0.0003492 | LIMCH1(0)                         |
| rs1994738   | 12 | 19956655  | 0.0002928 | -0.07459 | 0.0004261 | .                                 |
| rs13118320  | 4  | 131306743 | 0.0002928 | -0.08184 | 0.0003745 | .                                 |
| rs6139985   | 20 | 6417028   | 0.0002931 | 0.0767   | 0.0001865 | .                                 |
| rs1222216   | 11 | 30346052  | 0.0002932 | -0.08929 | 0.000264  | C11orf46(0)                       |
| 5:164406328 | 5  | 164406328 | 0.0002932 | 0.2895   | 0.0001871 | .                                 |
| rs11214796  | 11 | 113854679 | 0.0002933 | -0.09029 | 0.0007327 | HTR3A(0)                          |
| 6:99936958  | 6  | 99936958  | 0.0002934 | 0.09409  | 0.0003412 | USP45(0)                          |
| rs2032768   | 12 | 106297697 | 0.0002937 | -0.08088 | 0.0003458 | .                                 |
| rs2032767   | 12 | 106297710 | 0.0002937 | -0.08088 | 0.0003458 | .                                 |
| rs11103563  | 9  | 137778698 | 0.0002938 | 0.1207   | 0.000264  | FCN2(0)                           |
| rs330808    | 6  | 99994764  | 0.000294  | 0.09393  | 0.0003738 | CCNC(0)                           |
| rs170710    | 6  | 99995053  | 0.000294  | 0.09393  | 0.0003738 | CCNC(0)                           |
| rs4939991   | 18 | 48126014  | 0.0002942 | -0.07913 | 0.0003075 | MAPK4(0)                          |
| rs17759625  | 2  | 84815684  | 0.0002942 | -0.08368 | 0.0004651 | DNHL1(+3.706kb)                   |
| rs6570100   | 6  | 99948800  | 0.0002942 | 0.09439  | 0.000379  | USP45(0)                          |
| rs62508807  | 8  | 71703331  | 0.0002942 | 0.1317   | 0.000221  | .                                 |
| rs7029830   | 9  | 116681888 | 0.0002943 | 0.07721  | 0.0007392 | ZNF618(0)                         |
| rs9603074   | 13 | 37171620  | 0.0002945 | 0.1005   | 0.0001353 | .                                 |
| rs28653205  | 4  | 131315491 | 0.0002945 | 0.08717  | 0.0004315 | .                                 |
| 4:157349683 | 4  | 157349683 | 0.0002945 | -0.077   | 0.0005222 | .                                 |
| rs9552016   | 13 | 20418554  | 0.0002947 | -0.1155  | 0.0005014 | ZMYM5(0)                          |
| rs10000929  | 4  | 131297024 | 0.0002947 | 0.08645  | 0.0005262 | .                                 |
| rs4508927   | 4  | 41557820  | 0.000295  | -0.09417 | 0.0004975 | LIMCH1(0)                         |
| rs12372959  | 15 | 27337656  | 0.0002951 | 0.08515  | 0.0003437 | .                                 |
| rs3742147   | 13 | 20263014  | 0.0002952 | -0.09352 | 0.0007831 | PSPC1(-13.99kb) MPHOSPH8(+16.37k) |
| rs10504485  | 8  | 71823702  | 0.0002955 | 0.1309   | 0.0002444 | .                                 |
| rs1212252   | 14 | 100483356 | 0.0002958 | -0.1644  | 0.0007142 | .                                 |
| rs12865440  | 13 | 20415038  | 0.0002959 | -0.1209  | 0.000474  | ZMYM5(0)                          |
| rs1496971   | 6  | 99641248  | 0.0002959 | -0.08756 | 0.0002696 | .                                 |
| rs4303654   | 19 | 31035367  | 0.000296  | -0.08701 | 0.0001103 | ZNF536(0)                         |
| rs782455    | 3  | 127394280 | 0.0002961 | 0.07559  | 0.0002594 | PODXL2(+2.628kb) MGLL(-13.63kb)   |
| rs12525432  | 6  | 99627125  | 0.0002965 | -0.08734 | 0.0002818 | .                                 |
| rs12199968  | 6  | 99628239  | 0.0002965 | -0.08734 | 0.0002818 | .                                 |
| rs1566115   | 6  | 99632323  | 0.0002965 | -0.08734 | 0.0002818 | .                                 |
| rs2209157   | 6  | 99964012  | 0.0002965 | 0.09358  | 0.0003512 | USP45(+0.76kb)                    |
| 7:130937049 | 7  | 130937049 | 0.0002965 | 0.123    | 0.0000511 | .                                 |
| 14:73910903 | 14 | 73910903  | 0.0002967 | -0.09519 | 0.0007905 | NUMB(0)                           |
| rs28582608  | 5  | 88810308  | 0.0002968 | 0.1685   | 0.0003121 | .                                 |
| rs548751    | 1  | 93560015  | 0.0002969 | 0.1496   | 0.000837  | MTF2(0)                           |
| rs4382812   | 10 | 57463282  | 0.0002972 | -0.07614 | 0.0002882 | .                                 |

|            |    |           |           |          |           |                                  |
|------------|----|-----------|-----------|----------|-----------|----------------------------------|
| rs35320132 | 4  | 41616187  | 0.0002973 | -0.0874  | 0.0003245 | LIMCH1(0)                        |
| rs11952569 | 5  | 27499240  | 0.0002973 | 0.07773  | 0.0003555 | .                                |
| rs12188064 | 5  | 27504455  | 0.0002973 | 0.07773  | 0.0003555 | .                                |
| rs10942256 | 5  | 27507229  | 0.0002973 | 0.07773  | 0.0003555 | .                                |
| rs12656885 | 5  | 27508353  | 0.0002973 | 0.07773  | 0.0003555 | .                                |
| rs2329622  | 5  | 27520955  | 0.0002973 | 0.07773  | 0.0003555 | .                                |
| rs6859925  | 5  | 27522176  | 0.0002973 | 0.07773  | 0.0003555 | .                                |
| rs6878601  | 5  | 27522302  | 0.0002973 | 0.07773  | 0.0003555 | .                                |
| rs12201712 | 6  | 99642178  | 0.0002975 | -0.08737 | 0.0002747 | .                                |
| rs12215641 | 6  | 99642209  | 0.0002975 | -0.08737 | 0.0002747 | .                                |
| rs6592581  | 11 | 74366514  | 0.0002976 | -0.09653 | 0.0002631 | POLD3(+12.75kb)                  |
| rs6592582  | 11 | 74366864  | 0.0002976 | -0.09653 | 0.0002631 | POLD3(+13.1kb)                   |
| rs4944055  | 11 | 74368166  | 0.0002976 | -0.09653 | 0.0002631 | POLD3(+14.4kb)                   |
| rs4944929  | 11 | 74368205  | 0.0002976 | -0.09653 | 0.0002631 | POLD3(+14.44kb)                  |
| rs9389445  | 6  | 99959434  | 0.0002979 | 0.09427  | 0.0003523 | USP45(0)                         |
| rs10225805 | 7  | 13911420  | 0.000298  | 0.0776   | 0.000275  | ETV1(-19.43kb)                   |
| rs1619597  | 10 | 59963558  | 0.0002983 | -0.3685  | 0.0003389 | IPMK(0)                          |
| rs2227365  | 19 | 17006110  | 0.0002984 | 0.08006  | 0.0004272 | SIN3B(+14.95kb) F2RL3(+3.28kb) C |
| rs11154875 | 6  | 99923899  | 0.000299  | 0.09389  | 0.0003405 | USP45(0)                         |
| rs10825570 | 10 | 57453495  | 0.0002992 | -0.07552 | 0.0002892 | .                                |
| rs10763235 | 10 | 57456900  | 0.0002992 | -0.07552 | 0.0002892 | .                                |
| rs9917861  | 4  | 131312071 | 0.0002994 | 0.08684  | 0.000425  | .                                |
| rs62318214 | 4  | 131399376 | 0.0002995 | 0.08612  | 0.0005504 | .                                |
| rs1533107  | 5  | 118204921 | 0.0002997 | -0.101   | 0.0004451 | DTWD2(0)                         |
| rs62508774 | 8  | 71693851  | 0.0003007 | 0.1441   | 0.0002679 | .                                |
| rs1030788  | 8  | 64035651  | 0.0003008 | 0.0764   | 0.0003137 | .                                |
| rs7984483  | 13 | 31131084  | 0.000301  | -0.1236  | 0.0003832 | .                                |
| rs6948232  | 7  | 130006327 | 0.000301  | 0.0954   | 0.0003428 | CPA5(0) CPA1(-14.03kb)           |
| rs2418261  | 9  | 116721460 | 0.000301  | 0.0766   | 0.0007973 | ZNF618(0)                        |
| rs56218287 | 7  | 48301076  | 0.0003018 | -0.1985  | 0.0004379 | ABCA13(0)                        |
| rs7125415  | 11 | 113310681 | 0.000302  | 0.1331   | 0.0002561 | DRD2(0)                          |
| rs9373177  | 6  | 99972361  | 0.0003022 | 0.0939   | 0.0003723 | USP45(+9.109kb) CCNC(-17.9kb)    |
| rs56183921 | 7  | 48289921  | 0.0003023 | -0.1976  | 0.0004609 | ABCA13(0)                        |
| rs1467862  | 22 | 22513231  | 0.0003025 | 0.1081   | 0.0004185 | .                                |
| 3:47510580 | 3  | 47510580  | 0.0003035 | -0.2892  | 0.0004074 | SCAP(0)                          |
| rs17451810 | 5  | 151901848 | 0.0003041 | -0.08598 | 0.0004142 | .                                |
| rs4958554  | 5  | 151903294 | 0.0003041 | -0.08598 | 0.0004142 | .                                |
| rs59564654 | 7  | 36581935  | 0.0003041 | 0.1298   | 0.000464  | AOAH(0)                          |
| rs10932186 | 2  | 208142194 | 0.0003044 | -0.1148  | 0.0002226 | .                                |
| rs61850517 | 10 | 57465727  | 0.0003047 | -0.07543 | 0.0003141 | .                                |
| rs12967548 | 18 | 48129197  | 0.000305  | 0.08543  | 0.0005271 | MAPK4(0)                         |
| rs10007810 | 4  | 41554364  | 0.0003054 | -0.09247 | 0.0005493 | LIMCH1(0)                        |
| rs9766722  | 6  | 99648850  | 0.0003054 | -0.08725 | 0.000279  | .                                |
| rs7330985  | 13 | 37187088  | 0.0003057 | 0.1022   | 0.0001463 | .                                |
| rs2196642  | 18 | 48129132  | 0.0003058 | -0.07748 | 0.0003436 | MAPK4(0)                         |
| rs1437650  | 18 | 48129687  | 0.0003058 | -0.07748 | 0.0003436 | MAPK4(0)                         |
| rs9294310  | 6  | 85435275  | 0.000306  | 0.1771   | 0.0004024 | TBX18(-8.881kb)                  |

|             |    |           |           |          |           |                    |
|-------------|----|-----------|-----------|----------|-----------|--------------------|
| rs7127628   | 11 | 74369884  | 0.0003062 | -0.09632 | 0.0002706 | POLD3(+16.12kb)    |
| rs1324477   | 1  | 33900498  | 0.0003066 | -0.133   | 0.0002234 | .                  |
| rs994197    | 6  | 99960694  | 0.0003069 | 0.09356  | 0.0003652 | USP45(0)           |
| rs7766335   | 6  | 99966713  | 0.0003072 | 0.0935   | 0.0003752 | USP45(+3.461kb)    |
| rs9551994   | 13 | 20325160  | 0.0003073 | -0.1164  | 0.0004808 | PSPC1(0)           |
| rs1999531   | 10 | 2172881   | 0.0003074 | 0.07487  | 0.0003752 | .                  |
| rs330807    | 6  | 99993742  | 0.0003074 | 0.09396  | 0.0003868 | CCNC(0)            |
| 1:95680309  | 1  | 95680309  | 0.0003076 | -0.3317  | 0.0001884 | RWDD3(-19.4kb)     |
| rs17739186  | 15 | 27327169  | 0.0003077 | 0.09303  | 0.0002497 | .                  |
| 5:88800464  | 5  | 88800464  | 0.0003077 | 0.168    | 0.000323  | .                  |
| 5:88803949  | 5  | 88803949  | 0.0003077 | 0.168    | 0.000323  | .                  |
| 5:88804104  | 5  | 88804104  | 0.0003077 | 0.168    | 0.000323  | .                  |
| 5:88809419  | 5  | 88809419  | 0.0003077 | 0.168    | 0.000323  | .                  |
| rs9402856   | 6  | 99959410  | 0.0003078 | 0.0939   | 0.0003785 | USP45(0)           |
| rs11610394  | 12 | 72272519  | 0.0003081 | -0.1325  | 0.0003545 | TBC1D15(0)         |
| rs4916415   | 1  | 171151873 | 0.0003084 | 0.09615  | 0.000182  | FMO2(-2.514kb)     |
| 1:33845658  | 1  | 33845658  | 0.0003087 | -0.1365  | 0.0002301 | PHC2(+4.464kb)     |
| rs16869395  | 5  | 39900877  | 0.0003088 | -0.1024  | 0.0003627 | .                  |
| rs7984366   | 13 | 31131185  | 0.0003089 | -0.1204  | 0.000428  | .                  |
| rs7872508   | 9  | 137778887 | 0.0003093 | 0.1202   | 0.0002755 | FCN2(0)            |
| 13:99800931 | 13 | 99800931  | 0.0003095 | -0.1262  | 0.0004906 | .                  |
| rs1176714   | 11 | 113855526 | 0.0003098 | -0.09038 | 0.0007584 | HTR3A(0)           |
| rs6933557   | 6  | 110246588 | 0.0003102 | 0.07551  | 0.0003094 | .                  |
| rs62318176  | 4  | 131357783 | 0.0003103 | 0.08553  | 0.0005626 | .                  |
| rs11949258  | 5  | 27567478  | 0.0003103 | 0.07847  | 0.0003311 | .                  |
| rs11666850  | 19 | 31040983  | 0.0003104 | -0.1025  | 0.0002582 | ZNF536(0)          |
| rs11671893  | 19 | 31041053  | 0.0003104 | -0.1025  | 0.0002582 | ZNF536(0)          |
| rs11778964  | 8  | 14411204  | 0.0003105 | -0.1053  | 0.0006025 | SGCZ(0)            |
| rs1933342   | 11 | 30312825  | 0.0003106 | -0.08842 | 0.0002742 | .                  |
| rs10835648  | 11 | 30320506  | 0.0003106 | -0.08842 | 0.0002742 | .                  |
| rs7952339   | 11 | 30327344  | 0.0003106 | -0.08842 | 0.0002742 | C11orf46(-17.3kb)  |
| rs2211018   | 11 | 30330079  | 0.0003106 | -0.08842 | 0.0002742 | C11orf46(-14.57kb) |
| rs7926465   | 11 | 30333016  | 0.0003106 | -0.08842 | 0.0002742 | C11orf46(-11.63kb) |
| rs1616223   | 11 | 30338783  | 0.0003106 | -0.08842 | 0.0002742 | C11orf46(-5.865kb) |
| rs1765133   | 11 | 30339400  | 0.0003106 | -0.08842 | 0.0002742 | C11orf46(-5.248kb) |
| rs1222221   | 11 | 30342738  | 0.0003106 | -0.08842 | 0.0002742 | C11orf46(-1.91kb)  |
| rs1222219   | 11 | 30344345  | 0.0003106 | -0.08842 | 0.0002742 | C11orf46(-0.303kb) |
| rs11617167  | 13 | 99871698  | 0.0003106 | -0.1298  | 0.000495  | UBAC2(0)           |
| rs61952882  | 13 | 69725803  | 0.0003113 | 0.08479  | 0.0005435 | .                  |
| rs13194567  | 6  | 99922159  | 0.0003113 | 0.09358  | 0.000355  | USP45(0)           |
| rs12526314  | 6  | 99922476  | 0.0003113 | 0.09358  | 0.000355  | USP45(0)           |
| 6:99922631  | 6  | 99922631  | 0.0003113 | 0.09358  | 0.000355  | USP45(0)           |
| rs11154874  | 6  | 99923706  | 0.0003113 | 0.09358  | 0.000355  | USP45(0)           |
| rs34363219  | 19 | 29555886  | 0.0003114 | 0.176    | 0.0006167 | .                  |
| rs34673926  | 19 | 29558849  | 0.0003114 | 0.176    | 0.0006167 | .                  |
| rs1043909   | 1  | 230417371 | 0.0003115 | -0.09027 | 0.0002067 | GALNT2(0)          |
| rs62510687  | 8  | 71797955  | 0.0003116 | 0.1507   | 0.0002324 | .                  |

|             |    |           |           |          |           |                           |
|-------------|----|-----------|-----------|----------|-----------|---------------------------|
| rs10825567  | 10 | 57450122  | 0.0003123 | -0.07539 | 0.0003035 | .                         |
| rs9508880   | 13 | 20339540  | 0.0003123 | -0.09381 | 0.0008311 | PSPC1(0)                  |
| 8:71727846  | 8  | 71727846  | 0.0003124 | 0.1428   | 0.0001726 | .                         |
| rs4280520   | 20 | 6418188   | 0.0003126 | 0.0758   | 0.000185  | .                         |
| 15:55715189 | 15 | 55715189  | 0.0003127 | -0.08276 | 0.0003986 | DYX1C1(0) CCPG1(+14.62kb) |
| rs2047098   | 5  | 39925723  | 0.0003128 | -0.1035  | 0.0003477 | .                         |
| rs12869485  | 13 | 20207226  | 0.000313  | -0.1209  | 0.0005778 | MPHOSPH8(-0.653kb)        |
| rs2298004   | 13 | 20208232  | 0.000313  | -0.1209  | 0.0005778 | MPHOSPH8(0)               |
| rs9506313   | 13 | 20220095  | 0.0003132 | -0.09418 | 0.000838  | MPHOSPH8(0)               |
| rs34292633  | 6  | 99908970  | 0.0003134 | 0.0935   | 0.0003815 | USP45(0)                  |
| rs13214012  | 6  | 99909482  | 0.0003134 | 0.0935   | 0.0003815 | USP45(0)                  |
| rs11154865  | 6  | 99910842  | 0.0003134 | 0.0935   | 0.0003815 | USP45(0)                  |
| rs11154866  | 6  | 99911124  | 0.0003134 | 0.0935   | 0.0003815 | USP45(0)                  |
| rs12524864  | 6  | 99625695  | 0.0003136 | -0.08702 | 0.0003036 | .                         |
| rs12066963  | 1  | 208913083 | 0.0003137 | -0.3089  | 0.0004109 | .                         |
| rs4381290   | 10 | 57463092  | 0.0003137 | -0.07574 | 0.0003034 | .                         |
| rs10825575  | 10 | 57463405  | 0.0003137 | -0.07574 | 0.0003034 | .                         |
| rs10825576  | 10 | 57463834  | 0.0003137 | -0.07574 | 0.0003034 | .                         |
| rs12412236  | 10 | 57463976  | 0.0003137 | -0.07574 | 0.0003034 | .                         |
| rs58442713  | 21 | 27154441  | 0.0003137 | -0.128   | 0.0003382 | GABPA(+9.67kb)            |
| rs10825577  | 10 | 57464203  | 0.0003138 | -0.07572 | 0.0003044 | .                         |
| rs10763244  | 10 | 57464443  | 0.0003138 | -0.07572 | 0.0003044 | .                         |
| rs2325772   | 3  | 84085538  | 0.0003138 | -0.1382  | 0.0004405 | .                         |
| rs7990854   | 13 | 20364501  | 0.0003139 | -0.1134  | 0.0006076 | PSPC1(+7.418kb)           |
| rs3847619   | 11 | 35360747  | 0.0003141 | 0.07729  | 0.0002913 | SLC1A2(0)                 |
| rs12096504  | 1  | 161917749 | 0.0003142 | 0.08285  | 0.0007928 | ATF6(0)                   |
| rs9508887   | 13 | 20356941  | 0.0003146 | -0.09422 | 0.0007668 | PSPC1(0)                  |
| rs7250115   | 19 | 31033472  | 0.000315  | -0.09555 | 0.0001882 | ZNF536(0)                 |
| rs10941482  | 5  | 39911417  | 0.0003151 | -0.1024  | 0.0003596 | .                         |
| rs12203597  | 6  | 7085512   | 0.0003152 | -0.08027 | 0.0002564 | .                         |
| rs13212024  | 6  | 99913962  | 0.0003152 | 0.09351  | 0.0003792 | USP45(0)                  |
| rs12875875  | 13 | 37199122  | 0.0003157 | 0.1019   | 0.0001533 | .                         |
| rs59657255  | 13 | 99827151  | 0.0003158 | -0.1375  | 0.0005286 | .                         |
| 5:117597601 | 5  | 117597601 | 0.000316  | 0.1603   | 0.0007312 | .                         |
| rs62510701  | 8  | 71814822  | 0.000316  | 0.1337   | 0.000242  | .                         |
| rs17689776  | 8  | 71832012  | 0.000316  | 0.1337   | 0.000242  | .                         |
| rs5757107   | 22 | 22511496  | 0.0003162 | 0.1072   | 0.0004183 | .                         |
| rs5757110   | 22 | 22511588  | 0.0003162 | 0.1072   | 0.0004183 | .                         |
| rs56769389  | 3  | 68382780  | 0.0003162 | -0.1072  | 0.0004336 | FAM19A1(0)                |
| rs2149951   | 20 | 6417695   | 0.0003163 | 0.07576  | 0.0001863 | .                         |
| rs7669579   | 4  | 80677313  | 0.000317  | -0.08189 | 0.0006664 | .                         |
| rs4594953   | 6  | 99654085  | 0.000317  | -0.08704 | 0.0002844 | .                         |
| rs13120632  | 4  | 190303801 | 0.0003174 | 0.1323   | 0.0001751 | .                         |
| rs6856773   | 4  | 190303957 | 0.0003174 | 0.1323   | 0.0001751 | .                         |
| rs7828651   | 8  | 64043172  | 0.0003178 | 0.07606  | 0.0003583 | .                         |
| 1:95698877  | 1  | 95698877  | 0.0003182 | -0.3308  | 0.0001949 | RWDD3(-0.833kb)           |
| rs13166714  | 5  | 27539027  | 0.0003183 | 0.07734  | 0.0003778 | .                         |

|              |    |           |           |          |           |                              |
|--------------|----|-----------|-----------|----------|-----------|------------------------------|
| rs6038495    | 20 | 6422001   | 0.0003187 | 0.07572  | 0.0001796 | .                            |
| rs9498418    | 6  | 101331838 | 0.0003189 | 0.1803   | 0.0004651 | ASCC3(+2.614kb)              |
| rs8007472    | 14 | 73796749  | 0.000319  | -0.09494 | 0.0008175 | NUMB(0)                      |
| rs7725557    | 5  | 27537695  | 0.0003194 | 0.0775   | 0.0004371 | .                            |
| rs7720738    | 5  | 39879402  | 0.0003198 | -0.1057  | 0.0004124 | .                            |
| rs17547816   | 7  | 48311658  | 0.0003201 | -0.1978  | 0.0004584 | ABCA13(0)                    |
| rs10260568   | 7  | 130937777 | 0.0003203 | 0.1224   | 0.0000553 | .                            |
| rs6979264    | 7  | 130938585 | 0.0003203 | 0.1224   | 0.0000553 | .                            |
| rs6979517    | 7  | 130938942 | 0.0003203 | 0.1224   | 0.0000553 | .                            |
| rs12372281   | 12 | 59209270  | 0.0003206 | 0.1985   | 0.0008256 | .                            |
| rs12370599   | 12 | 59209434  | 0.0003206 | 0.1985   | 0.0008256 | .                            |
| rs6570121    | 6  | 99968156  | 0.0003212 | 0.09317  | 0.0003843 | USP45(+4.904kb)              |
| rs6570125    | 6  | 99968319  | 0.0003212 | 0.09317  | 0.0003843 | USP45(+5.067kb)              |
| rs7852787    | 9  | 116680454 | 0.0003212 | -0.07522 | 0.000806  | ZNF618(0)                    |
| rs10496910   | 2  | 142778992 | 0.0003213 | 0.1849   | 0.0001688 | LRP1B(0)                     |
| rs7785114    | 7  | 67028881  | 0.0003217 | 0.1263   | 0.0002844 | .                            |
| 12:108050704 | 12 | 108050704 | 0.0003223 | 0.238    | 0.0006965 | BTBD11(0)                    |
| rs544187     | 20 | 48107408  | 0.0003223 | -0.1324  | 0.0003753 | PTGIS(-13kb) KCNB1(+8.227kb) |
| 10:93019958  | 10 | 93019958  | 0.0003224 | 0.1687   | 0.0004766 | PCGF5(0)                     |
| rs10941483   | 5  | 39915764  | 0.0003228 | -0.1021  | 0.0003692 | .                            |
| rs7706413    | 5  | 39931389  | 0.0003228 | -0.1021  | 0.0003692 | .                            |
| rs11033079   | 11 | 35362050  | 0.0003232 | 0.07732  | 0.0002792 | SLC1A2(0)                    |
| 6:49726524   | 6  | 49726524  | 0.0003235 | 0.1068   | 0.0004175 | .                            |
| rs7127499    | 11 | 74370022  | 0.0003237 | -0.09645 | 0.0002788 | POLD3(+16.26kb)              |
| rs6054260    | 20 | 6430197   | 0.0003239 | 0.07546  | 0.0001869 | .                            |
| rs1566131    | 14 | 52514684  | 0.0003242 | -0.08552 | 0.0004117 | NID2(0)                      |
| rs10000587   | 4  | 131307410 | 0.0003242 | -0.08065 | 0.0004794 | .                            |
| rs11004975   | 10 | 57462007  | 0.0003244 | -0.07503 | 0.0003339 | .                            |
| 1:95717555   | 1  | 95717555  | 0.0003248 | -0.3305  | 0.0001978 | RWDD3(+4.774kb)              |
| rs4711038    | 6  | 22913709  | 0.000325  | 0.104    | 0.0005186 | .                            |
| rs4711039    | 6  | 22913955  | 0.000325  | 0.104    | 0.0005186 | .                            |
| rs1566132    | 14 | 52511836  | 0.0003252 | -0.08471 | 0.0004244 | NID2(0)                      |
| rs1982963    | 14 | 52509101  | 0.0003253 | -0.08911 | 0.0003201 | NID2(0)                      |
| 5:39900570   | 5  | 39900570  | 0.0003254 | -0.1021  | 0.0003788 | .                            |
| 9:137779607  | 9  | 137779607 | 0.0003256 | 0.1196   | 0.0002874 | FCN2(+0.241kb)               |
| rs11625614   | 14 | 73768719  | 0.0003257 | -0.09575 | 0.0009291 | NUMB(0)                      |
| rs4840007    | 6  | 99649289  | 0.0003258 | -0.08688 | 0.0002987 | .                            |
| rs11004976   | 10 | 57462081  | 0.000326  | -0.075   | 0.0003356 | .                            |
| rs16907692   | 10 | 57462296  | 0.000326  | -0.075   | 0.0003356 | .                            |
| rs1510295    | 6  | 124329313 | 0.0003261 | 0.1078   | 0.000176  | NKAIN2(0)                    |
| rs4958555    | 5  | 151903379 | 0.0003264 | -0.08562 | 0.0004408 | .                            |
| rs4916414    | 1  | 171151790 | 0.0003265 | 0.09555  | 0.0002113 | FMO2(-2.597kb)               |
| rs6887212    | 5  | 40894564  | 0.0003265 | 0.07719  | 0.0006123 | C7(-15.03kb)                 |
| rs9550585    | 13 | 20299564  | 0.0003266 | -0.1139  | 0.0005322 | PSPC1(0)                     |
| rs7099991    | 10 | 2175191   | 0.0003267 | 0.07385  | 0.0004331 | .                            |
| rs7100116    | 10 | 2175248   | 0.0003267 | 0.07385  | 0.0004331 | .                            |
| rs7100130    | 10 | 2175294   | 0.0003267 | 0.07385  | 0.0004331 | .                            |



|             |    |           |           |          |           |                    |
|-------------|----|-----------|-----------|----------|-----------|--------------------|
| rs7100243   | 10 | 2175333   | 0.0003267 | 0.07385  | 0.0004331 | .                  |
| rs1930653   | 10 | 2175719   | 0.0003267 | 0.07385  | 0.0004331 | .                  |
| rs55772696  | 13 | 99876211  | 0.0003269 | -0.1293  | 0.0005184 | UBAC2(0)           |
| rs10235884  | 7  | 66891268  | 0.0003272 | 0.07762  | 0.0004517 | .                  |
| 10:72142189 | 10 | 72142189  | 0.0003273 | -0.2675  | 0.0004816 | LRRC20(0)          |
| 10:72142344 | 10 | 72142344  | 0.0003273 | -0.2675  | 0.0004816 | LRRC20(0)          |
| rs35401148  | 19 | 29560377  | 0.0003274 | 0.1766   | 0.0006571 | .                  |
| rs6850470   | 4  | 157355122 | 0.0003277 | -0.0756  | 0.000583  | .                  |
| rs6976747   | 7  | 36575477  | 0.0003277 | 0.1296   | 0.0005003 | AOAH(0)            |
| rs1417272   | 9  | 85480415  | 0.0003277 | -0.0778  | 0.0006459 | .                  |
| rs11155076  | 6  | 100226858 | 0.000328  | 0.09406  | 0.0006762 | .                  |
| rs2645738   | 14 | 52513202  | 0.0003282 | -0.08466 | 0.0004388 | NID2(0)            |
| rs12433612  | 14 | 62374645  | 0.0003283 | -0.08277 | 0.0006649 | .                  |
| rs7248031   | 19 | 30753815  | 0.0003284 | -0.07542 | 0.0002655 | .                  |
| rs6117261   | 20 | 6425158   | 0.0003285 | 0.0754   | 0.0001936 | .                  |
| rs9550533   | 13 | 20190521  | 0.0003286 | -0.1206  | 0.000607  | MPHOSPH8(-17.36kb) |
| rs4756212   | 11 | 35362311  | 0.0003288 | 0.07616  | 0.0003191 | SLC1A2(0)          |
| rs1025683   | 18 | 48127570  | 0.0003289 | -0.07671 | 0.0003887 | MAPK4(0)           |
| rs17617120  | 5  | 155299213 | 0.000329  | 0.09591  | 0.0006652 | .                  |
| rs4640528   | 3  | 111421705 | 0.0003291 | -0.1505  | 0.0003031 | PLCXD2(0)          |
| rs7986224   | 13 | 100046745 | 0.0003293 | -0.1288  | 0.0005025 | UBAC2(+8.064kb)    |
| rs130834    | 22 | 48815311  | 0.0003293 | 0.1519   | 0.0001661 | .                  |
| rs12552660  | 9  | 86008430  | 0.0003293 | -0.1134  | 0.0002101 | FRMD3(0)           |
| rs11031016  | 11 | 30284920  | 0.0003297 | -0.08858 | 0.0003122 | .                  |
| rs2392947   | 10 | 57486652  | 0.0003298 | -0.0746  | 0.0004101 | .                  |
| rs10499032  | 6  | 101488697 | 0.0003298 | 0.1861   | 0.0006577 | .                  |
| rs41263696  | 1  | 171180485 | 0.0003301 | 0.2255   | 0.0003108 | FMO2(0)            |
| 4:178100486 | 4  | 178100486 | 0.0003301 | 0.3608   | 0.0003997 | .                  |
| rs62530460  | 8  | 71114795  | 0.0003303 | 0.08971  | 0.0003516 | NCOA2(0)           |
| 12:58358816 | 12 | 58358816  | 0.0003304 | -0.1799  | 0.0003029 | XRCC6BP1(+7.764kb) |
| rs35596473  | 13 | 20196144  | 0.0003304 | -0.1207  | 0.0005974 | MPHOSPH8(-11.73kb) |
| rs10825586  | 10 | 57476871  | 0.0003305 | -0.07492 | 0.0003282 | .                  |
| rs1759338   | 10 | 59845801  | 0.0003307 | -0.3129  | 0.0005121 | .                  |
| rs9317942   | 13 | 71048072  | 0.0003309 | 0.09929  | 0.0002782 | .                  |
| rs16841150  | 4  | 7772105   | 0.0003309 | 0.1272   | 0.0006205 | AFAP1(0)           |
| 4:7772859   | 4  | 7772859   | 0.0003309 | 0.1272   | 0.0006205 | AFAP1(0)           |
| rs34843205  | 9  | 85489320  | 0.000331  | -0.07613 | 0.0009218 | .                  |
| rs9508918   | 13 | 20440531  | 0.0003313 | -0.114   | 0.0005359 | ZMYM5(+2.758kb)    |
| rs12684512  | 9  | 137777504 | 0.0003313 | 0.1209   | 0.0004211 | FCN2(0)            |
| rs28670587  | 4  | 131315846 | 0.0003316 | 0.08643  | 0.0005016 | .                  |
| rs1027833   | 3  | 78664093  | 0.0003318 | -0.07567 | 0.0004184 | ROBO1(0)           |
| 5:39900398  | 5  | 39900398  | 0.000332  | -0.1112  | 0.0003889 | .                  |
| rs11617048  | 13 | 20199716  | 0.0003322 | -0.1205  | 0.000607  | MPHOSPH8(-8.163kb) |
| rs11618064  | 13 | 20199798  | 0.0003322 | -0.1205  | 0.000607  | MPHOSPH8(-8.081kb) |
| rs3213756   | 2  | 50692560  | 0.0003322 | 0.07958  | 0.0003707 | NRXN1(0)           |
| rs56097272  | 5  | 151899155 | 0.0003326 | -0.08556 | 0.0004542 | .                  |
| rs12236704  | 9  | 612167    | 0.0003328 | 0.08714  | 0.000422  | KANK1(0)           |

|             |    |           |           |          |           |                                |
|-------------|----|-----------|-----------|----------|-----------|--------------------------------|
| rs10517636  | 4  | 157351242 | 0.0003333 | -0.07508 | 0.0006031 | .                              |
| rs496529    | 1  | 245563442 | 0.0003343 | -0.0774  | 0.0005234 | KIF26B(0)                      |
| rs56834750  | 14 | 52509483  | 0.0003344 | -0.08408 | 0.0004776 | NID2(0)                        |
| rs4901186   | 14 | 52509484  | 0.0003344 | -0.08408 | 0.0004776 | NID2(0)                        |
| rs3818187   | 14 | 52509788  | 0.0003344 | -0.08408 | 0.0004776 | NID2(0)                        |
| rs10794861  | 10 | 2176676   | 0.0003345 | 0.07373  | 0.0004441 | .                              |
| rs7093259   | 10 | 2176944   | 0.0003345 | 0.07373  | 0.0004441 | .                              |
| rs975692    | 10 | 2177527   | 0.0003345 | 0.07373  | 0.0004441 | .                              |
| rs7068529   | 10 | 2178754   | 0.0003345 | 0.07373  | 0.0004441 | .                              |
| rs10751850  | 10 | 2179157   | 0.0003345 | 0.07373  | 0.0004441 | .                              |
| rs10751852  | 10 | 2179553   | 0.0003345 | 0.07373  | 0.0004441 | .                              |
| rs7895227   | 10 | 2179852   | 0.0003345 | 0.07373  | 0.0004441 | .                              |
| rs952970    | 10 | 2180027   | 0.0003345 | 0.07373  | 0.0004441 | .                              |
| rs7749230   | 6  | 110219431 | 0.0003348 | -0.07329 | 0.0004043 | .                              |
| 1:171167533 | 1  | 171167533 | 0.0003352 | 0.2252   | 0.0003156 | FMO2(0)                        |
| rs28369878  | 1  | 171169400 | 0.0003352 | 0.2252   | 0.0003156 | FMO2(0)                        |
| rs7130694   | 11 | 74370018  | 0.0003352 | -0.09625 | 0.0002885 | POLD3(+16.25kb)                |
| rs1509437   | 4  | 131313950 | 0.0003352 | 0.08738  | 0.0005318 | .                              |
| rs6038497   | 20 | 6422103   | 0.0003353 | 0.07567  | 0.0002011 | .                              |
| rs7900890   | 10 | 93015718  | 0.0003354 | 0.1704   | 0.0003803 | PCGF5(0)                       |
| rs28363558  | 1  | 171078978 | 0.0003356 | 0.2455   | 0.000463  | FMO3(0)                        |
| rs9498408   | 6  | 101292340 | 0.0003358 | 0.1617   | 0.00068   | ASCC3(0)                       |
| rs9390699   | 6  | 101306502 | 0.0003358 | 0.1617   | 0.00068   | ASCC3(0)                       |
| rs1916506   | 10 | 57449174  | 0.0003359 | -0.07495 | 0.0003343 | .                              |
| rs1916505   | 10 | 57449372  | 0.0003359 | -0.07495 | 0.0003343 | .                              |
| rs1916504   | 10 | 57449404  | 0.0003359 | -0.07495 | 0.0003343 | .                              |
| rs1916503   | 10 | 57449482  | 0.0003359 | -0.07495 | 0.0003343 | .                              |
| rs7328604   | 13 | 20230525  | 0.0003359 | -0.1191  | 0.0005972 | MPHOSPH8(0)                    |
| rs6912892   | 6  | 99972609  | 0.0003362 | 0.09321  | 0.0004086 | USP45(+9.357kb) CCNC(-17.65kb) |
| 18:59697152 | 18 | 59697152  | 0.0003363 | 0.08821  | 0.0007484 | PIGN(-14.3kb)                  |
| 18:59697258 | 18 | 59697258  | 0.0003363 | 0.08821  | 0.0007484 | PIGN(-14.2kb)                  |
| rs4503314   | 1  | 33880813  | 0.0003368 | -0.1296  | 0.0002493 | .                              |
| rs10513274  | 3  | 145685526 | 0.0003368 | -0.07852 | 0.0005469 | .                              |
| rs7126573   | 11 | 74369095  | 0.0003371 | -0.09492 | 0.000362  | POLD3(+15.33kb)                |
| rs9386861   | 6  | 110235749 | 0.0003371 | 0.0784   | 0.0005122 | .                              |
| rs9485415   | 6  | 101279459 | 0.0003373 | 0.1621   | 0.0006839 | ASCC3(0)                       |
| rs4289699   | 7  | 66887111  | 0.0003374 | 0.07804  | 0.0005189 | .                              |
| rs28369887  | 1  | 171171170 | 0.0003375 | 0.2251   | 0.0003174 | FMO2(0)                        |
| 1:171172096 | 1  | 171172096 | 0.0003375 | 0.2251   | 0.0003174 | FMO2(0)                        |
| rs28369897  | 1  | 171173882 | 0.0003375 | 0.2251   | 0.0003174 | FMO2(0)                        |
| 1:171174199 | 1  | 171174199 | 0.0003375 | 0.2251   | 0.0003174 | FMO2(0)                        |
| rs28369910  | 1  | 171177703 | 0.0003375 | 0.2251   | 0.0003174 | FMO2(0)                        |
| rs8009393   | 14 | 73839580  | 0.0003376 | -0.09378 | 0.0008741 | NUMB(0)                        |
| rs6415092   | 6  | 167196263 | 0.0003377 | -0.1067  | 0.000422  | RPS6KA2(0)                     |
| rs56365850  | 7  | 66888688  | 0.0003378 | 0.07714  | 0.0004775 | .                              |
| rs6452391   | 5  | 27538049  | 0.0003379 | 0.07697  | 0.0004055 | .                              |
| rs6452392   | 5  | 27538108  | 0.0003379 | 0.07697  | 0.0004055 | .                              |

|              |    |           |           |          |           |                         |
|--------------|----|-----------|-----------|----------|-----------|-------------------------|
| 8:14029673   | 8  | 14029673  | 0.0003379 | 0.3184   | 0.0005123 | SGCZ(0)                 |
| rs4432342    | 18 | 48126505  | 0.0003382 | -0.0766  | 0.0004015 | MAPK4(0)                |
| rs7937232    | 11 | 74281910  | 0.0003383 | -0.09829 | 0.0002445 | .                       |
| 14:54333376  | 14 | 54333376  | 0.0003384 | -0.1108  | 0.0002506 | .                       |
| rs10940664   | 5  | 27556071  | 0.0003386 | 0.07706  | 0.0004031 | .                       |
| rs7004499    | 8  | 71688493  | 0.0003387 | 0.1296   | 0.0002538 | .                       |
| rs10978979   | 9  | 110422678 | 0.0003387 | -0.1041  | 0.0002389 | .                       |
| rs10472345   | 5  | 40898486  | 0.0003389 | 0.07782  | 0.0007249 | C7(-11.11kb)            |
| rs62309569   | 4  | 131315673 | 0.000339  | 0.0855   | 0.0005869 | .                       |
| 8:71692872   | 8  | 71692872  | 0.0003391 | 0.1336   | 0.0002706 | .                       |
| rs6899537    | 6  | 110187323 | 0.0003393 | -0.07335 | 0.0004849 | .                       |
| rs9693405    | 8  | 19117102  | 0.0003394 | -0.2312  | 0.0005328 | .                       |
| rs11172711   | 12 | 59147223  | 0.0003396 | 0.1949   | 0.0004715 | .                       |
| rs12367975   | 12 | 59149234  | 0.0003396 | 0.1949   | 0.0004715 | .                       |
| rs7040951    | 9  | 75130835  | 0.0003399 | -0.0751  | 0.000481  | TMC1(-5.881kb)          |
| rs7682468    | 4  | 56170669  | 0.0003401 | 0.1528   | 0.0005566 | .                       |
| rs7732916    | 5  | 27535473  | 0.0003404 | 0.07692  | 0.0004055 | .                       |
| rs1807692    | 22 | 21073122  | 0.0003405 | 0.07625  | 0.0009808 | PI4KA(0)                |
| rs10849008   | 12 | 4301876   | 0.0003406 | -0.07708 | 0.0007144 | .                       |
| rs11618992   | 13 | 20215569  | 0.0003408 | -0.1212  | 0.0005655 | MPHOSPH8(0)             |
| rs2021814    | 13 | 20214648  | 0.0003412 | -0.1211  | 0.0005706 | MPHOSPH8(0)             |
| rs13173361   | 5  | 27557469  | 0.0003412 | 0.0769   | 0.0004048 | .                       |
| rs10243093   | 7  | 55908653  | 0.0003413 | -0.1132  | 0.0006154 | sep/14(0)               |
| rs3853682    | 18 | 48131715  | 0.0003414 | -0.07584 | 0.0004422 | MAPK4(0)                |
| 1:171161494  | 1  | 171161494 | 0.0003415 | 0.2248   | 0.000325  | FMO2(0)                 |
| rs28369844   | 1  | 171161966 | 0.0003415 | 0.2248   | 0.000325  | FMO2(0)                 |
| 1:171165164  | 1  | 171165164 | 0.0003415 | 0.2248   | 0.000325  | FMO2(0)                 |
| 11:113320382 | 11 | 113320382 | 0.0003416 | 0.1573   | 0.0005917 | DRD2(0)                 |
| rs912338     | 6  | 99945885  | 0.0003418 | 0.09336  | 0.0004365 | USP45(0)                |
| rs62465190   | 7  | 66890666  | 0.0003418 | 0.0775   | 0.0004939 | .                       |
| rs7083171    | 10 | 2180786   | 0.000342  | 0.07362  | 0.0004546 | .                       |
| rs13203850   | 6  | 110201561 | 0.0003421 | -0.07303 | 0.0004027 | .                       |
| rs6027864    | 20 | 59428518  | 0.0003422 | 0.1143   | 0.0001846 | .                       |
| rs13213992   | 6  | 7083218   | 0.0003422 | -0.07866 | 0.0003154 | .                       |
| rs9684139    | 4  | 131346829 | 0.0003428 | 0.08536  | 0.0005427 | .                       |
| rs9634360    | 13 | 20191596  | 0.0003429 | -0.1204  | 0.0006195 | MPHOSPH8(-16.28kb)      |
| 17:33924377  | 17 | 33924377  | 0.0003429 | -0.2245  | 0.0005983 | PEX12(+18.8kb) AP2B1(0) |
| rs6481177    | 10 | 57476292  | 0.000343  | -0.07475 | 0.0003272 | .                       |
| rs12347957   | 9  | 110423951 | 0.000343  | -0.1029  | 0.0002801 | .                       |
| rs11157981   | 14 | 54334390  | 0.0003433 | -0.1107  | 0.0002538 | .                       |
| rs3773195    | 3  | 78663274  | 0.0003435 | -0.0773  | 0.0002433 | ROBO1(0)                |
| rs7099720    | 10 | 57437266  | 0.0003438 | -0.0751  | 0.0003633 | .                       |
| rs350086     | 5  | 40177604  | 0.0003439 | -0.1064  | 0.0003357 | .                       |
| 2:201636950  | 2  | 201636950 | 0.0003442 | -0.1344  | 0.0007973 | .                       |
| rs7934742    | 11 | 74311051  | 0.0003444 | -0.09684 | 0.0003498 | POLD3(0)                |
| rs10132830   | 14 | 73888847  | 0.0003445 | -0.09361 | 0.0008505 | NUMB(0)                 |
| rs28363562   | 1  | 171079459 | 0.0003446 | 0.2438   | 0.0004746 | FMO3(0)                 |

|             |    |           |           |          |           |                                  |
|-------------|----|-----------|-----------|----------|-----------|----------------------------------|
| rs7338462   | 13 | 99844797  | 0.0003446 | -0.1302  | 0.0005534 | UBAC2(-8.365kb)                  |
| rs6510073   | 19 | 30756075  | 0.0003447 | -0.07519 | 0.0002722 | .                                |
| rs2758459   | 9  | 74996043  | 0.000345  | 0.07463  | 0.0005339 | ZFAND5(+15.88kb)                 |
| rs12311449  | 12 | 86620710  | 0.0003459 | -0.1818  | 0.0005147 | MGAT4C(0)                        |
| rs2181305   | 13 | 37172599  | 0.0003459 | 0.101    | 0.0001525 | .                                |
| rs10495607  | 2  | 13011705  | 0.000346  | -0.1468  | 0.0005501 | .                                |
| 2:142774934 | 2  | 142774934 | 0.000346  | 0.187    | 0.0001869 | LRP1B(0)                         |
| rs9375977   | 6  | 99637123  | 0.0003463 | -0.0865  | 0.0003259 | .                                |
| rs10734405  | 11 | 30273750  | 0.0003467 | -0.0888  | 0.0003233 | FSHB(+16.93kb)                   |
| 2:104607449 | 2  | 104607449 | 0.0003467 | -0.107   | 0.0005388 | .                                |
| 2:104608691 | 2  | 104608691 | 0.0003467 | -0.107   | 0.0005388 | .                                |
| rs17417022  | 2  | 104610147 | 0.0003467 | -0.107   | 0.0005388 | .                                |
| rs330813    | 6  | 100000890 | 0.0003468 | 0.09285  | 0.0004385 | CCNC(0)                          |
| rs10862     | 6  | 166755975 | 0.0003473 | 0.0858   | 0.0004009 | SFT2D1(0)                        |
| rs58803643  | 7  | 131875268 | 0.0003473 | -0.192   | 0.000325  | PLXNA4(0)                        |
| rs4322755   | 18 | 48118360  | 0.0003479 | -0.0764  | 0.0004153 | MAPK4(0)                         |
| 5:88823446  | 5  | 88823446  | 0.0003482 | 0.167    | 0.0003505 | .                                |
| rs16869416  | 5  | 39919202  | 0.0003484 | -0.1017  | 0.0003968 | .                                |
| rs10805806  | 5  | 27541451  | 0.0003485 | 0.07691  | 0.0004179 | .                                |
| rs12659906  | 5  | 27543893  | 0.0003485 | 0.07691  | 0.0004179 | .                                |
| rs17687068  | 8  | 71566706  | 0.0003489 | 0.1406   | 0.0003006 | XKR9(-14.89kb) LACTB2(0)         |
| rs11004990  | 10 | 57491965  | 0.0003491 | -0.07452 | 0.0003621 | .                                |
| rs1423260   | 5  | 39901521  | 0.0003491 | -0.1016  | 0.000402  | .                                |
| rs27630     | 16 | 51990591  | 0.0003492 | 0.1652   | 0.000551  | .                                |
| rs27371     | 16 | 51990722  | 0.0003492 | 0.1652   | 0.000551  | .                                |
| rs716871    | 18 | 48112720  | 0.0003492 | -0.07625 | 0.0004231 | MAPK4(0)                         |
| rs1437653   | 18 | 48116243  | 0.0003492 | -0.07625 | 0.0004231 | MAPK4(0)                         |
| rs458586    | 5  | 31371127  | 0.0003492 | 0.1048   | 0.0003262 | .                                |
| 7:48326290  | 7  | 48326290  | 0.0003493 | -0.1948  | 0.0005006 | ABCA13(0)                        |
| rs12026244  | 1  | 240953257 | 0.0003502 | 0.07818  | 0.0005507 | RG57(0)                          |
| rs7304860   | 12 | 54687489  | 0.0003506 | -0.07582 | 0.0005236 | NFE2(0) HNRNPA1(+8.459kb) CBX5(+ |
| rs12518672  | 5  | 27496017  | 0.0003512 | 0.07673  | 0.0004183 | .                                |
| 5:151905013 | 5  | 151905013 | 0.0003513 | -0.08493 | 0.0004607 | .                                |
| rs2892632   | 6  | 99629281  | 0.0003513 | -0.08664 | 0.0003368 | .                                |
| 6:110237352 | 6  | 110237352 | 0.0003517 | 0.07791  | 0.0005256 | .                                |
| rs12047177  | 1  | 240953461 | 0.000352  | 0.07792  | 0.0005484 | RG57(0)                          |
| 13:99834199 | 13 | 99834199  | 0.0003526 | -0.1294  | 0.0005744 | UBAC2(-18.96kb)                  |
| rs11666918  | 19 | 31034674  | 0.0003529 | -0.1016  | 0.0002828 | ZNF536(0)                        |
| rs12460433  | 19 | 31035649  | 0.0003529 | -0.1016  | 0.0002828 | ZNF536(0)                        |
| 2:104618600 | 2  | 104618600 | 0.0003529 | -0.1061  | 0.00056   | .                                |
| rs7921670   | 10 | 57501198  | 0.0003531 | -0.07513 | 0.0004598 | .                                |
| rs7752902   | 6  | 99985823  | 0.0003531 | 0.09279  | 0.0004428 | CCNC(-4.439kb)                   |
| rs7939421   | 11 | 35362837  | 0.0003534 | 0.07606  | 0.0003666 | SLC1A2(0)                        |
| rs60315825  | 7  | 79165309  | 0.0003543 | -0.1528  | 0.0005612 | .                                |
| rs6472514   | 8  | 71195486  | 0.0003545 | 0.08749  | 0.000479  | NCOA2(0)                         |
| rs60677458  | 7  | 131869722 | 0.0003547 | -0.1918  | 0.0003299 | PLXNA4(0)                        |
| 7:131871569 | 7  | 131871569 | 0.0003547 | -0.1918  | 0.0003299 | PLXNA4(0)                        |

|             |    |           |           |          |           |                   |
|-------------|----|-----------|-----------|----------|-----------|-------------------|
| rs7724208   | 5  | 27528745  | 0.000355  | 0.07655  | 0.000444  | .                 |
| rs13180380  | 5  | 27529696  | 0.000355  | 0.07655  | 0.000444  | .                 |
| 10:21607980 | 10 | 21607980  | 0.0003551 | 0.1834   | 0.0002669 | .                 |
| rs2025195   | 9  | 74988340  | 0.0003552 | 0.07527  | 0.0005531 | ZFAND5(+8.177kb)  |
| rs11630312  | 15 | 92071756  | 0.0003553 | 0.07445  | 0.0004119 | .                 |
| rs896398    | 16 | 8113853   | 0.0003556 | 0.07968  | 0.0007993 | .                 |
| rs6139990   | 20 | 6418645   | 0.0003562 | 0.07499  | 0.0002127 | .                 |
| rs6139991   | 20 | 6418776   | 0.0003562 | 0.07499  | 0.0002127 | .                 |
| rs6117258   | 20 | 6419378   | 0.0003562 | 0.07499  | 0.0002127 | .                 |
| rs6054239   | 20 | 6421173   | 0.0003562 | 0.07499  | 0.0002127 | .                 |
| rs58172625  | 5  | 115418081 | 0.0003563 | -0.1768  | 0.0005916 | COMMD10(-2.645kb) |
| 5:39917970  | 5  | 39917970  | 0.0003567 | -0.1073  | 0.0003916 | .                 |
| rs4739050   | 8  | 64034747  | 0.0003569 | 0.07555  | 0.0004223 | .                 |
| rs1395161   | 5  | 40009259  | 0.0003571 | -0.1034  | 0.000407  | .                 |
| rs10473845  | 5  | 27536489  | 0.0003574 | 0.07663  | 0.0004313 | .                 |
| 8:71722640  | 8  | 71722640  | 0.0003577 | 0.1377   | 0.0002872 | .                 |
| rs1150220   | 11 | 113857886 | 0.0003579 | -0.09072 | 0.0007941 | HTR3A(0)          |
| rs10090582  | 8  | 54440206  | 0.000358  | -0.1127  | 0.0009078 | .                 |
| rs1544241   | 18 | 855264    | 0.0003594 | -0.07348 | 0.0004543 | .                 |
| rs7741195   | 6  | 110200022 | 0.0003602 | -0.07262 | 0.0004365 | .                 |
| rs35418369  | 6  | 110201092 | 0.0003602 | -0.07262 | 0.0004365 | .                 |
| rs13297790  | 9  | 85492781  | 0.0003603 | -0.07569 | 0.0009896 | .                 |
| rs12653531  | 5  | 27479752  | 0.0003607 | 0.07633  | 0.0003821 | .                 |
| 5:88814359  | 5  | 88814359  | 0.0003608 | 0.1666   | 0.0003626 | .                 |
| rs4311448   | 5  | 88820114  | 0.0003608 | 0.1666   | 0.0003626 | .                 |
| 5:88821206  | 5  | 88821206  | 0.0003608 | 0.1666   | 0.0003626 | .                 |
| 5:88822590  | 5  | 88822590  | 0.0003608 | 0.1666   | 0.0003626 | .                 |
| rs35469199  | 7  | 66888668  | 0.0003611 | 0.07682  | 0.0005004 | .                 |
| rs12309228  | 12 | 86591328  | 0.0003612 | -0.189   | 0.00052   | MGAT4C(0)         |
| rs62318215  | 4  | 131401291 | 0.0003614 | 0.08524  | 0.0006464 | .                 |
| rs10158612  | 1  | 181029805 | 0.000362  | 0.1052   | 0.0008447 | MR1(+5.172kb)     |
| rs7015641   | 8  | 105828756 | 0.000362  | -0.3065  | 0.0007875 | .                 |
| rs10825585  | 10 | 57472959  | 0.0003622 | -0.0745  | 0.0003727 | .                 |
| rs12644937  | 4  | 37985106  | 0.0003623 | 0.07626  | 0.0003647 | TBC1D1(0)         |
| rs56199929  | 19 | 31033240  | 0.0003625 | -0.1012  | 0.0002957 | ZNF536(0)         |
| rs992595    | 18 | 48124715  | 0.0003628 | -0.07574 | 0.0005113 | MAPK4(0)          |
| rs6657314   | 1  | 171155103 | 0.0003631 | 0.0761   | 0.0002163 | FMO2(0)           |
| 7:36584875  | 7  | 36584875  | 0.0003633 | 0.1273   | 0.0005934 | AOAH(0)           |
| rs10473843  | 5  | 27529751  | 0.0003635 | 0.07648  | 0.0004565 | .                 |
| rs1908805   | 6  | 99646446  | 0.0003635 | -0.0864  | 0.0003115 | .                 |
| rs7818350   | 8  | 71270004  | 0.0003636 | 0.08721  | 0.000385  | NCOA2(0)          |
| rs13027062  | 2  | 217757389 | 0.0003637 | 0.18     | 0.0005347 | .                 |
| rs56273411  | 6  | 85425781  | 0.0003637 | 0.1759   | 0.00047   | TBX18(-18.38kb)   |
| 18:59697288 | 18 | 59697288  | 0.000364  | 0.08767  | 0.0008201 | PIGN(-14.17kb)    |
| 4:35581236  | 4  | 35581236  | 0.000364  | -0.1011  | 0.0006974 | .                 |
| 4:35581240  | 4  | 35581240  | 0.000364  | -0.1011  | 0.0006974 | .                 |
| rs17350523  | 1  | 171217445 | 0.0003643 | 0.07741  | 0.000255  | FMO1(-0.217kb)    |

|              |    |           |           |          |           |                               |
|--------------|----|-----------|-----------|----------|-----------|-------------------------------|
| rs2057518    | 6  | 99980522  | 0.0003643 | 0.09287  | 0.0004306 | USP45(+17.27kb) CCNC(-9.74kb) |
| rs6915889    | 6  | 85443856  | 0.0003645 | 0.1767   | 0.0004724 | TBX18(-0.3kb)                 |
| rs9457205    | 6  | 167192399 | 0.0003647 | -0.1084  | 0.0005036 | RPS6KA2(0)                    |
| rs871808     | 9  | 116698480 | 0.0003649 | 0.07529  | 0.0008347 | ZNF618(0)                     |
| rs1340453    | 9  | 85477109  | 0.0003653 | -0.07929 | 0.000533  | .                             |
| 4:153229300  | 4  | 153229300 | 0.0003655 | 0.1748   | 0.0007273 | FBXW7(-13.11kb)               |
| rs10825572   | 10 | 57459309  | 0.0003656 | -0.07431 | 0.0003712 | .                             |
| rs10763245   | 10 | 57464616  | 0.0003657 | -0.0743  | 0.0003723 | .                             |
| rs10825578   | 10 | 57464774  | 0.0003657 | -0.0743  | 0.0003723 | .                             |
| rs1916495    | 10 | 57466158  | 0.0003657 | -0.0743  | 0.0003723 | .                             |
| rs1916494    | 10 | 57466442  | 0.0003657 | -0.0743  | 0.0003723 | .                             |
| rs11004983   | 10 | 57467891  | 0.0003657 | -0.0743  | 0.0003723 | .                             |
| rs1717772    | 11 | 30340133  | 0.0003658 | -0.08736 | 0.0003338 | C11orf46(-4.515kb)            |
| rs16887053   | 6  | 22912382  | 0.0003658 | 0.103    | 0.0005805 | .                             |
| rs782431     | 3  | 127332011 | 0.0003668 | 0.07379  | 0.00028   | PODXL2(-16.03kb) MCM2(0)      |
| rs4429980    | 6  | 110206499 | 0.0003668 | -0.0717  | 0.0004839 | .                             |
| rs10763236   | 10 | 57457514  | 0.0003669 | -0.0743  | 0.0003722 | .                             |
| rs3847446    | 10 | 57458627  | 0.0003669 | -0.0743  | 0.0003722 | .                             |
| rs3858275    | 10 | 57458898  | 0.0003669 | -0.0743  | 0.0003722 | .                             |
| rs10763241   | 10 | 57460588  | 0.0003669 | -0.0743  | 0.0003722 | .                             |
| rs7915937    | 10 | 57460955  | 0.0003669 | -0.0743  | 0.0003722 | .                             |
| rs16841209   | 4  | 7782434   | 0.000367  | 0.1246   | 0.0006199 | AFAP1(0)                      |
| rs56128741   | 18 | 40192467  | 0.0003671 | -0.1022  | 0.0003905 | .                             |
| rs55967412   | 18 | 40192512  | 0.0003671 | -0.1022  | 0.0003905 | .                             |
| rs7692843    | 4  | 190303369 | 0.0003671 | 0.1308   | 0.0001976 | .                             |
| rs28405705   | 7  | 66888139  | 0.0003672 | 0.07646  | 0.0005272 | .                             |
| rs12241025   | 10 | 129220237 | 0.0003673 | 0.08431  | 0.0004299 | .                             |
| rs10825579   | 10 | 57468511  | 0.0003674 | -0.07429 | 0.0003724 | .                             |
| rs10825580   | 10 | 57469014  | 0.0003674 | -0.07429 | 0.0003724 | .                             |
| rs10825583   | 10 | 57469577  | 0.0003674 | -0.07429 | 0.0003724 | .                             |
| rs10825584   | 10 | 57469774  | 0.0003674 | -0.07429 | 0.0003724 | .                             |
| rs11004986   | 10 | 57470219  | 0.0003674 | -0.07429 | 0.0003724 | .                             |
| rs11082831   | 18 | 48113037  | 0.0003675 | -0.07656 | 0.000479  | MAPK4(0)                      |
| rs6670502    | 1  | 162622751 | 0.0003676 | 0.08139  | 0.0003037 | DDR2(0)                       |
| rs134211     | 22 | 35526007  | 0.000368  | -0.07607 | 0.0004383 | .                             |
| rs80729      | 22 | 35526206  | 0.000368  | -0.07607 | 0.0004383 | .                             |
| rs80730      | 22 | 35526281  | 0.000368  | -0.07607 | 0.0004383 | .                             |
| rs134212     | 22 | 35526465  | 0.000368  | -0.07607 | 0.0004383 | .                             |
| rs134213     | 22 | 35526478  | 0.000368  | -0.07607 | 0.0004383 | .                             |
| 10:113508301 | 10 | 113508301 | 0.0003684 | 0.1995   | 0.0006529 | .                             |
| rs9542352    | 13 | 71049786  | 0.0003685 | 0.09873  | 0.0003181 | .                             |
| rs11004954   | 10 | 57430517  | 0.0003686 | -0.07468 | 0.0003849 | .                             |
| rs735225     | 4  | 17251421  | 0.0003688 | 0.168    | 0.0003725 | .                             |
| rs7922805    | 10 | 57430146  | 0.0003697 | -0.07444 | 0.000358  | .                             |
| rs7099439    | 10 | 2175480   | 0.0003698 | 0.07329  | 0.0004951 | .                             |
| rs6472523    | 8  | 71302692  | 0.0003699 | 0.08715  | 0.000393  | NCOA2(0)                      |
| rs6925884    | 6  | 101406380 | 0.0003703 | 0.1281   | 0.000574  | .                             |

|             |    |           |           |          |           |                                   |
|-------------|----|-----------|-----------|----------|-----------|-----------------------------------|
| rs9386851   | 6  | 110187241 | 0.0003707 | -0.07258 | 0.0005352 | .                                 |
| rs2290810   | 13 | 20251791  | 0.0003711 | -0.09331 | 0.000992  | MPHOSPH8(+5.151kb)                |
| 1:93784203  | 1  | 93784203  | 0.0003713 | 0.148    | 0.0008884 | .                                 |
| rs6881731   | 5  | 27561557  | 0.0003713 | 0.07639  | 0.0004427 | .                                 |
| rs60715670  | 5  | 27561719  | 0.0003713 | 0.07639  | 0.0004427 | .                                 |
| rs2976188   | 8  | 87236844  | 0.0003713 | -0.09869 | 0.0005015 | SLC7A13(0)                        |
| 1:171077274 | 1  | 171077274 | 0.0003714 | 0.2419   | 0.0005015 | FMO3(0)                           |
| rs28363552  | 1  | 171077675 | 0.0003714 | 0.2419   | 0.0005015 | FMO3(0)                           |
| 5:41575541  | 5  | 41575541  | 0.0003717 | -0.2579  | 0.0003477 | .                                 |
| rs6761973   | 3  | 141449314 | 0.0003718 | -0.1942  | 0.0007657 | RNF7(-7.736kb)                    |
| rs2967210   | 5  | 40057381  | 0.0003719 | -0.103   | 0.0004442 | .                                 |
| rs55636642  | 6  | 99647794  | 0.0003719 | -0.08593 | 0.0003457 | .                                 |
| rs6592580   | 11 | 74366458  | 0.0003723 | -0.09488 | 0.0003286 | POLD3(+12.69kb)                   |
| rs8095469   | 18 | 855317    | 0.0003723 | -0.07505 | 0.0005742 | .                                 |
| rs13147473  | 4  | 36097997  | 0.0003726 | 0.1268   | 0.0008509 | CENTD1(0)                         |
| rs7577873   | 2  | 208133793 | 0.0003727 | -0.1079  | 0.0002929 | .                                 |
| rs4958550   | 5  | 151889813 | 0.0003727 | -0.08675 | 0.000509  | .                                 |
| rs56050684  | 5  | 151890550 | 0.0003727 | -0.08675 | 0.000509  | .                                 |
| rs6139992   | 20 | 6418814   | 0.0003732 | 0.07492  | 0.0002184 | .                                 |
| rs2333136   | 14 | 73854376  | 0.0003733 | -0.09313 | 0.0009475 | NUMB(0)                           |
| rs10794863  | 10 | 2179200   | 0.0003734 | 0.07322  | 0.0004841 | .                                 |
| 4:131393816 | 4  | 131393816 | 0.0003735 | 0.08478  | 0.0006687 | .                                 |
| rs6038498   | 20 | 6422519   | 0.0003738 | 0.0746   | 0.000224  | .                                 |
| rs6139993   | 20 | 6422570   | 0.0003738 | 0.0746   | 0.000224  | .                                 |
| rs6054242   | 20 | 6422658   | 0.0003738 | 0.0746   | 0.000224  | .                                 |
| rs17677348  | 8  | 71197547  | 0.0003739 | 0.08747  | 0.0003822 | NCOA2(0)                          |
| rs2645750   | 14 | 52502792  | 0.0003745 | -0.08633 | 0.0004711 | NID2(0)                           |
| rs2645749   | 14 | 52502795  | 0.0003745 | -0.08633 | 0.0004711 | NID2(0)                           |
| rs9790478   | 4  | 7770026   | 0.0003751 | 0.1262   | 0.0007148 | AFAP1(0)                          |
| rs12570090  | 10 | 9710675   | 0.0003753 | 0.0741   | 0.0002854 | .                                 |
| rs34582877  | 2  | 217757898 | 0.0003755 | 0.1793   | 0.000561  | .                                 |
| rs9508836   | 13 | 20252093  | 0.000376  | -0.09144 | 0.0009497 | MPHOSPH8(+5.453kb)                |
| rs9529755   | 13 | 71051627  | 0.0003768 | 0.09831  | 0.000316  | .                                 |
| 8:71768611  | 8  | 71768611  | 0.0003771 | 0.133    | 0.000291  | .                                 |
| rs61950545  | 13 | 20191265  | 0.0003773 | -0.1188  | 0.0006626 | MPHOSPH8(-16.61kb)                |
| rs4993701   | 7  | 66887872  | 0.0003774 | 0.07626  | 0.0005445 | .                                 |
| rs11034704  | 11 | 4952708   | 0.0003777 | -0.118   | 0.0008757 | OR51G1(+7.139kb) OR51G2(+15.81kb) |
| rs1023568   | 2  | 191515442 | 0.0003777 | -0.07191 | 0.0007884 | NAB1(0)                           |
| rs10443921  | 10 | 57431860  | 0.0003778 | -0.07426 | 0.0004111 | .                                 |
| rs7520777   | 1  | 171216717 | 0.0003779 | 0.07838  | 0.0002592 | FMO1(-0.945kb)                    |
| rs56044017  | 5  | 151663784 | 0.0003784 | -0.101   | 0.0007289 | .                                 |
| rs58519059  | 11 | 78708421  | 0.0003788 | -0.08001 | 0.0005069 | ODZ4(0)                           |
| rs11620518  | 13 | 99887570  | 0.0003792 | -0.1277  | 0.0005886 | UBAC2(0) GPR18(-19.4kb)           |
| rs11936239  | 4  | 35580550  | 0.0003794 | -0.09692 | 0.0006553 | .                                 |
| 1:171147601 | 1  | 171147601 | 0.0003798 | 0.2692   | 0.0004888 | FMO2(-6.786kb)                    |
| rs4769908   | 13 | 20365786  | 0.0003798 | -0.09326 | 0.0008934 | PSPC1(+8.703kb)                   |
| rs926268    | 1  | 171151991 | 0.0003803 | 0.07535  | 0.0002245 | FMO2(-2.396kb)                    |

|              |    |           |           |          |           |                                |
|--------------|----|-----------|-----------|----------|-----------|--------------------------------|
| rs11673135   | 19 | 31044844  | 0.0003803 | -0.102   | 0.0002687 | ZNF536(0)                      |
| rs6862093    | 5  | 27526829  | 0.0003803 | 0.07876  | 0.0005183 | .                              |
| rs1958645    | 14 | 54321406  | 0.0003807 | -0.1067  | 0.0003477 | .                              |
| rs55696164   | 5  | 151890623 | 0.0003808 | -0.08664 | 0.0005036 | .                              |
| rs10825561   | 10 | 57433015  | 0.0003809 | -0.07425 | 0.0004123 | .                              |
| rs7913702    | 10 | 57435067  | 0.0003809 | -0.07425 | 0.0004123 | .                              |
| rs6986140    | 8  | 71278586  | 0.0003809 | 0.08709  | 0.0003877 | NCOA2(0)                       |
| rs2048955    | 2  | 144391132 | 0.0003811 | 0.1363   | 0.0006116 | ARHGAP15(0)                    |
| 10:113321945 | 10 | 113321945 | 0.0003812 | 0.2253   | 0.000757  | .                              |
| rs17129015   | 10 | 113322042 | 0.0003812 | 0.2253   | 0.000757  | .                              |
| 10:113322905 | 10 | 113322905 | 0.0003812 | 0.2253   | 0.000757  | .                              |
| rs7905975    | 10 | 113327263 | 0.0003812 | 0.2253   | 0.000757  | .                              |
| rs61103852   | 10 | 113328167 | 0.0003812 | 0.2253   | 0.000757  | .                              |
| rs7079476    | 10 | 113331783 | 0.0003812 | 0.2253   | 0.000757  | .                              |
| rs7095827    | 10 | 113332121 | 0.0003812 | 0.2253   | 0.000757  | .                              |
| rs4953923    | 2  | 135445946 | 0.0003813 | -0.107   | 0.0005455 | TMEM163(0)                     |
| 2:104670298  | 2  | 104670298 | 0.0003814 | -0.1378  | 0.0006363 | .                              |
| rs9321586    | 6  | 99984088  | 0.0003815 | 0.0923   | 0.0004704 | CCNC(-6.174kb)                 |
| rs10790212   | 11 | 117702690 | 0.0003817 | 0.08201  | 0.0008433 | FXD6(-5.002kb) FXD2(+3.883kb)  |
| rs7755707    | 6  | 99973544  | 0.0003819 | 0.09344  | 0.0004656 | USP45(+10.29kb) CCNC(-16.72kb) |
| rs11516688   | 10 | 57435873  | 0.0003827 | -0.07423 | 0.0004135 | .                              |
| rs62318216   | 4  | 131403460 | 0.0003831 | 0.08496  | 0.0006709 | .                              |
| rs4945841    | 6  | 110194146 | 0.0003831 | -0.07163 | 0.000508  | .                              |
| rs9398221    | 6  | 110196707 | 0.0003831 | -0.07163 | 0.000508  | .                              |
| rs6933886    | 6  | 110198009 | 0.0003831 | -0.07163 | 0.000508  | .                              |
| rs4421234    | 6  | 110198334 | 0.0003831 | -0.07163 | 0.000508  | .                              |
| rs427883     | 16 | 79244725  | 0.0003834 | -0.07876 | 0.0007083 | WWOX(0)                        |
| rs10825573   | 10 | 57460470  | 0.0003835 | -0.07415 | 0.0003909 | .                              |
| rs11741407   | 5  | 27549985  | 0.0003835 | 0.07644  | 0.0004552 | .                              |
| rs56110024   | 5  | 27550373  | 0.0003835 | 0.07644  | 0.0004552 | .                              |
| rs4846948    | 1  | 230420370 | 0.0003836 | -0.07434 | 0.0002615 | GALNT2(+2.424kb)               |
| rs7899963    | 10 | 57429832  | 0.0003837 | -0.07409 | 0.000376  | .                              |
| rs7922529    | 10 | 57429857  | 0.0003837 | -0.07409 | 0.000376  | .                              |
| rs7903546    | 10 | 57430242  | 0.0003837 | -0.07409 | 0.000376  | .                              |
| rs11004955   | 10 | 57430636  | 0.0003837 | -0.07409 | 0.000376  | .                              |
| rs10443951   | 10 | 57431464  | 0.0003837 | -0.07409 | 0.000376  | .                              |
| rs7044235    | 9  | 75127530  | 0.0003837 | -0.0743  | 0.0005452 | TMC1(-9.186kb)                 |
| rs2791446    | 9  | 18392900  | 0.0003838 | -0.1035  | 0.0005207 | .                              |
| rs12216144   | 6  | 99623458  | 0.0003839 | -0.08585 | 0.000369  | .                              |
| rs10088618   | 8  | 19115680  | 0.0003841 | -0.2289  | 0.0005741 | .                              |
| rs12589981   | 14 | 62370824  | 0.0003846 | -0.08142 | 0.0008614 | .                              |
| rs60579999   | 5  | 39963379  | 0.0003849 | -0.1105  | 0.0003308 | .                              |
| rs9790400    | 4  | 7769828   | 0.000385  | 0.126    | 0.0007224 | AFAP1(0)                       |
| rs34819964   | 9  | 75129054  | 0.000385  | -0.07431 | 0.0005447 | TMC1(-7.662kb)                 |
| rs10763237   | 10 | 57458231  | 0.0003851 | -0.07428 | 0.0004095 | .                              |
| rs652278     | 9  | 12839484  | 0.0003856 | -0.07904 | 0.0004314 | C9orf150(+16.43kb)             |
| rs59470184   | 4  | 17241365  | 0.0003857 | 0.1667   | 0.0003932 | .                              |



|             |    |           |           |          |           |                                |
|-------------|----|-----------|-----------|----------|-----------|--------------------------------|
| rs7654499   | 4  | 17241961  | 0.0003857 | 0.1667   | 0.0003932 | .                              |
| 4:17242302  | 4  | 17242302  | 0.0003857 | 0.1667   | 0.0003932 | .                              |
| rs6716218   | 2  | 104598824 | 0.0003864 | -0.09976 | 0.0008092 | .                              |
| rs7598000   | 2  | 104599715 | 0.0003864 | -0.09976 | 0.0008092 | .                              |
| 2:104600503 | 2  | 104600503 | 0.0003864 | -0.09976 | 0.0008092 | .                              |
| rs7910058   | 10 | 57434671  | 0.0003865 | -0.07408 | 0.0003768 | .                              |
| rs9400347   | 6  | 110247019 | 0.0003867 | 0.07355  | 0.0004668 | .                              |
| rs9321571   | 6  | 99953402  | 0.0003867 | 0.0921   | 0.0005552 | USP45(0)                       |
| rs10763229  | 10 | 57441397  | 0.0003868 | -0.07455 | 0.000345  | .                              |
| rs34214125  | 12 | 4789082   | 0.0003868 | -0.09803 | 0.0002595 | NDUFA9(0)                      |
| 6:85426192  | 6  | 85426192  | 0.0003868 | 0.1753   | 0.0004794 | TBX18(-17.96kb)                |
| rs9450009   | 6  | 85426487  | 0.0003868 | 0.1753   | 0.0004794 | TBX18(-17.67kb)                |
| rs17862361  | 7  | 126991906 | 0.000387  | -0.1137  | 0.0001523 | ZNF800(-18.45kb)               |
| rs58555252  | 5  | 27660348  | 0.0003872 | -0.08496 | 0.0007321 | .                              |
| rs7118314   | 11 | 74367284  | 0.0003873 | -0.09474 | 0.0003401 | POLD3(+13.52kb)                |
| rs7417576   | 1  | 161897498 | 0.0003877 | 0.08163  | 0.0009757 | ATF6(0)                        |
| rs4299128   | 15 | 92068914  | 0.0003877 | 0.07344  | 0.0006447 | .                              |
| rs2329625   | 5  | 27528372  | 0.0003883 | 0.07646  | 0.0004478 | .                              |
| rs6472520   | 8  | 71273315  | 0.0003886 | 0.08683  | 0.0004031 | NCOA2(0)                       |
| rs11667057  | 19 | 31034308  | 0.0003892 | -0.1008  | 0.0003177 | ZNF536(0)                      |
| rs9400335   | 6  | 110191623 | 0.0003901 | -0.0715  | 0.000518  | .                              |
| rs9374132   | 6  | 110193373 | 0.0003901 | -0.0715  | 0.000518  | .                              |
| rs4631333   | 6  | 110203240 | 0.0003901 | -0.0715  | 0.000518  | .                              |
| rs4132854   | 11 | 16524201  | 0.0003902 | 0.1024   | 0.0002834 | .                              |
| rs34506786  | 11 | 16524222  | 0.0003902 | 0.1024   | 0.0002834 | .                              |
| rs11004963  | 10 | 57442866  | 0.0003909 | -0.07496 | 0.000342  | .                              |
| rs4769907   | 13 | 20360512  | 0.0003916 | -0.09267 | 0.0009658 | PSPC1(+3.429kb)                |
| rs7525843   | 1  | 33875477  | 0.0003918 | -0.1273  | 0.0002954 | .                              |
| rs6456126   | 6  | 167196327 | 0.0003922 | -0.1056  | 0.0004901 | RPS6KA2(0)                     |
| rs4263476   | 5  | 27524096  | 0.0003924 | 0.07644  | 0.0005143 | .                              |
| rs11758062  | 6  | 100226135 | 0.0003925 | 0.09293  | 0.0008905 | .                              |
| 10:21610946 | 10 | 21610946  | 0.0003929 | 0.1887   | 0.0002745 | .                              |
| 12:90449207 | 12 | 90449207  | 0.0003929 | -0.3182  | 0.0004025 | .                              |
| rs13238420  | 7  | 86371167  | 0.0003929 | -0.1106  | 0.0006051 | GRM3(0)                        |
| rs11706444  | 3  | 36035041  | 0.0003934 | -0.2304  | 0.0003388 | .                              |
| rs60977772  | 10 | 113320104 | 0.0003945 | 0.2244   | 0.0007972 | .                              |
| 22:30647751 | 22 | 30647751  | 0.0003951 | -0.2315  | 0.0001773 | OSM(-11.07kb) LIF(+5.003kb)    |
| rs4240964   | 1  | 93593890  | 0.0003955 | 0.1419   | 0.0009818 | MTF2(0)                        |
| rs60885616  | 2  | 212904323 | 0.0003961 | -0.1001  | 0.0003792 | ERBB4(0)                       |
| rs10043278  | 5  | 27482937  | 0.0003965 | 0.07626  | 0.0004904 | .                              |
| rs7751134   | 6  | 99980953  | 0.0003966 | 0.092    | 0.0004925 | USP45(+17.7kb) CCNC(-9.309kb)  |
| rs2038714   | 6  | 99981879  | 0.0003966 | 0.092    | 0.0004925 | USP45(+18.63kb) CCNC(-8.383kb) |
| rs12404293  | 1  | 236677985 | 0.0003972 | -0.07497 | 0.0007011 | LGALS8(-3.579kb)               |
| rs409183    | 16 | 79247458  | 0.0003975 | -0.07983 | 0.0005389 | WVOX(+0.894kb)                 |
| rs2045533   | 18 | 48087851  | 0.0003977 | -0.07639 | 0.0004684 | MAPK4(0)                       |
| rs55663539  | 19 | 31041654  | 0.0003977 | -0.1042  | 0.0003005 | ZNF536(0)                      |
| 10:21614607 | 10 | 21614607  | 0.0003979 | 0.1884   | 0.0002794 | .                              |

|             |    |           |           |          |           |                                  |
|-------------|----|-----------|-----------|----------|-----------|----------------------------------|
| 10:21616470 | 10 | 21616470  | 0.0003979 | 0.1884   | 0.0002794 | .                                |
| rs6139994   | 20 | 6422606   | 0.0003985 | 0.07439  | 0.0002394 | .                                |
| rs12669051  | 7  | 79168763  | 0.0003987 | -0.1501  | 0.0006654 | .                                |
| 13:99889204 | 13 | 99889204  | 0.0003989 | -0.1272  | 0.0006161 | UBAC2(0) GPR18(-17.76kb)         |
| 1:171219801 | 1  | 171219801 | 0.000399  | 0.2257   | 0.0003996 | FMO1(0)                          |
| rs9308307   | 12 | 78852008  | 0.0003993 | 0.08483  | 0.0008296 | .                                |
| 8:71552144  | 8  | 71552144  | 0.0003994 | 0.1404   | 0.0003378 | LACTB2(0)                        |
| rs4675391   | 2  | 204842468 | 0.0003996 | -0.07704 | 0.0004863 | ICOS(+16.17kb)                   |
| rs7952661   | 11 | 74281777  | 0.0004    | -0.09709 | 0.0002914 | .                                |
| rs7113533   | 11 | 74284271  | 0.0004    | -0.09709 | 0.0002914 | POLD3(-19.36kb)                  |
| rs4944904   | 11 | 74285892  | 0.0004    | -0.09709 | 0.0002914 | POLD3(-17.74kb)                  |
| 18:67892643 | 18 | 67892643  | 0.0004002 | -0.2578  | 0.0007822 | RTTN(+19.68kb)                   |
| 18:67894259 | 18 | 67894259  | 0.0004002 | -0.2578  | 0.0007822 | .                                |
| rs7069336   | 10 | 57451426  | 0.0004005 | -0.07588 | 0.0003738 | .                                |
| rs1916499   | 10 | 57462529  | 0.0004007 | -0.07404 | 0.0004447 | .                                |
| 4:153226903 | 4  | 153226903 | 0.0004009 | 0.1816   | 0.0005663 | FBXW7(-15.51kb)                  |
| rs62181782  | 2  | 217764732 | 0.0004014 | 0.1763   | 0.0005543 | .                                |
| rs35889162  | 2  | 217765507 | 0.0004014 | 0.1763   | 0.0005543 | .                                |
| rs62354192  | 5  | 27527605  | 0.0004018 | 0.07595  | 0.0004901 | .                                |
| rs2329626   | 5  | 27530378  | 0.0004018 | 0.07595  | 0.0004901 | .                                |
| rs6452390   | 5  | 27531342  | 0.0004018 | 0.07595  | 0.0004901 | .                                |
| rs17451455  | 5  | 151888271 | 0.0004019 | -0.08677 | 0.0005516 | .                                |
| rs11154726  | 6  | 99618365  | 0.000402  | -0.08559 | 0.0003978 | .                                |
| rs9389427   | 6  | 99944858  | 0.0004021 | 0.09235  | 0.0005172 | USP45(0)                         |
| rs733615    | 6  | 99945794  | 0.0004021 | 0.09235  | 0.0005172 | USP45(0)                         |
| rs7632675   | 3  | 16461063  | 0.0004029 | 0.09843  | 0.0008101 | RFTN1(0)                         |
| rs8015790   | 14 | 73833005  | 0.000403  | -0.09281 | 0.0009969 | NUMB(0)                          |
| rs11004970  | 10 | 57454635  | 0.0004031 | -0.07382 | 0.0004058 | .                                |
| rs1466137   | 16 | 60396226  | 0.0004034 | -0.07524 | 0.000455  | .                                |
| rs17690316  | 8  | 71857421  | 0.0004037 | 0.1392   | 0.0002794 | .                                |
| 12:58366038 | 12 | 58366038  | 0.0004039 | -0.1766  | 0.0003693 | XRCC6BP1(+14.99kb)               |
| 12:58368528 | 12 | 58368528  | 0.0004039 | -0.1766  | 0.0003693 | XRCC6BP1(+17.48kb)               |
| 12:58375987 | 12 | 58375987  | 0.0004039 | -0.1766  | 0.0003693 | .                                |
| 12:58376785 | 12 | 58376785  | 0.0004039 | -0.1766  | 0.0003693 | .                                |
| rs1848130   | 12 | 58377772  | 0.0004039 | -0.1766  | 0.0003693 | .                                |
| 12:86615156 | 12 | 86615156  | 0.0004039 | -0.1854  | 0.0006063 | MGAT4C(0)                        |
| 12:86617797 | 12 | 86617797  | 0.0004039 | -0.1854  | 0.0006063 | MGAT4C(0)                        |
| rs12311272  | 12 | 86620432  | 0.0004039 | -0.1854  | 0.0006063 | MGAT4C(0)                        |
| 12:86620531 | 12 | 86620531  | 0.0004039 | -0.1854  | 0.0006063 | MGAT4C(0)                        |
| rs12311407  | 12 | 86620701  | 0.0004039 | -0.1854  | 0.0006063 | MGAT4C(0)                        |
| rs2137596   | 3  | 111421894 | 0.0004043 | -0.1287  | 0.0005901 | PLCXD2(0)                        |
| rs6978995   | 7  | 130938612 | 0.0004047 | 0.1195   | 0.0000871 | .                                |
| rs55843226  | 18 | 40195139  | 0.000405  | -0.102   | 0.0004215 | .                                |
| rs9457219   | 6  | 167212002 | 0.0004055 | -0.1028  | 0.0003936 | RPS6KA2(0)                       |
| rs4979036   | 9  | 114448271 | 0.0004055 | -0.07388 | 0.0005503 | LOC552891(+15.76kb) GNG10(+15.74 |
| rs7991116   | 13 | 20306218  | 0.0004056 | -0.1069  | 0.0005614 | PSPC1(0)                         |
| 22:30614145 | 22 | 30614145  | 0.0004064 | -0.197   | 0.0002298 | .                                |

|             |    |           |           |          |           |                                   |
|-------------|----|-----------|-----------|----------|-----------|-----------------------------------|
| rs2773396   | 9  | 116722828 | 0.0004065 | 0.077    | 0.0008121 | ZNF618(0)                         |
| 12:86606809 | 12 | 86606809  | 0.0004069 | -0.1853  | 0.00061   | MGAT4C(0)                         |
| rs8100987   | 19 | 57848002  | 0.0004069 | -0.1214  | 0.0004725 | ZNF543(+5.858kb) ZNF304(-14.64kb) |
| rs6957235   | 7  | 79164583  | 0.0004073 | -0.1642  | 0.0003809 | .                                 |
| rs1949741   | 10 | 57471131  | 0.0004074 | -0.0738  | 0.0004131 | .                                 |
| rs12570468  | 10 | 57471630  | 0.0004074 | -0.0738  | 0.0004131 | .                                 |
| rs61850539  | 10 | 57472022  | 0.0004074 | -0.0738  | 0.0004131 | .                                 |
| rs9687411   | 5  | 34994600  | 0.0004076 | 0.08413  | 0.0002798 | AGXT2(-3.605kb)                   |
| rs2225348   | 20 | 6434266   | 0.0004081 | -0.07426 | 0.0001804 | .                                 |
| 18:67896332 | 18 | 67896332  | 0.0004084 | -0.2573  | 0.0008024 | .                                 |
| rs10067730  | 5  | 88863259  | 0.0004091 | 0.2059   | 0.0005278 | .                                 |
| rs10248988  | 7  | 12618133  | 0.0004098 | 0.07334  | 0.0003348 | SCIN(0)                           |
| rs62179774  | 2  | 217837165 | 0.0004099 | 0.1694   | 0.0005559 | .                                 |
| rs1432723   | 5  | 155302582 | 0.0004101 | 0.09267  | 0.0008449 | .                                 |
| 6:108350679 | 6  | 108350679 | 0.0004106 | -0.3181  | 0.0007495 | OSTM1(-11.93kb)                   |
| rs4076882   | 8  | 87186589  | 0.0004108 | -0.1025  | 0.0007847 | .                                 |
| rs155058    | 5  | 95972369  | 0.0004109 | 0.07726  | 0.0008801 | .                                 |
| 5:117576798 | 5  | 117576798 | 0.0004123 | 0.1526   | 0.0009029 | .                                 |
| rs6957016   | 7  | 109733586 | 0.0004123 | 0.09594  | 0.0003193 | .                                 |
| rs10067114  | 5  | 40897499  | 0.0004129 | 0.07723  | 0.0008435 | C7(-12.1kb)                       |
| rs9450006   | 6  | 85406773  | 0.0004132 | 0.1738   | 0.0004804 | .                                 |
| rs6826732   | 4  | 131309692 | 0.0004136 | 0.08517  | 0.0006511 | .                                 |
| rs9402840   | 6  | 99942603  | 0.0004149 | 0.0925   | 0.0004959 | USP45(0)                          |
| 18:67889603 | 18 | 67889603  | 0.0004154 | -0.2497  | 0.0007566 | RTTN(+16.64kb)                    |
| rs13394203  | 2  | 142785189 | 0.0004157 | 0.17     | 0.000243  | LRP1B(0)                          |
| rs2142605   | 6  | 169767461 | 0.0004158 | -0.1018  | 0.0006696 | .                                 |
| rs13126842  | 4  | 122416662 | 0.0004165 | 0.1439   | 0.0002095 | .                                 |
| rs35424555  | 13 | 20221516  | 0.0004166 | -0.1224  | 0.000724  | MPHOSPH8(0)                       |
| rs10233558  | 7  | 55881666  | 0.0004166 | -0.1094  | 0.0008308 | sep/14(0)                         |
| rs10957516  | 8  | 71119051  | 0.0004171 | 0.08233  | 0.0005513 | NCOA2(0)                          |
| rs6427691   | 1  | 162621336 | 0.0004173 | 0.08056  | 0.0003458 | DDR2(0)                           |
| rs2852673   | 1  | 158862369 | 0.0004174 | -0.08777 | 0.0003853 | .                                 |
| rs62352269  | 5  | 27550131  | 0.0004178 | 0.07609  | 0.0004883 | .                                 |
| rs10473842  | 5  | 27482489  | 0.0004191 | 0.07534  | 0.0004553 | .                                 |
| rs10480736  | 7  | 79166169  | 0.0004191 | -0.1489  | 0.0006721 | .                                 |
| rs28630500  | 7  | 79166525  | 0.0004191 | -0.1489  | 0.0006721 | .                                 |
| rs7807979   | 7  | 79166735  | 0.0004191 | -0.1489  | 0.0006721 | .                                 |
| 8:19116353  | 8  | 19116353  | 0.0004193 | -0.2268  | 0.0006475 | .                                 |
| rs11538811  | 14 | 105171022 | 0.0004194 | -0.136   | 0.0002909 | INF2(0) C14orf151(0) ADSSL1(-19.  |
| rs10040601  | 5  | 73135485  | 0.0004198 | 0.07215  | 0.000338  | RGNEF(0)                          |
| rs155043    | 5  | 95968259  | 0.00042   | 0.07672  | 0.000981  | .                                 |
| 8:71502332  | 8  | 71502332  | 0.0004201 | 0.1406   | 0.000329  | TRAM1(0)                          |
| 18:40187140 | 18 | 40187140  | 0.0004202 | -0.1011  | 0.0004425 | .                                 |
| 12:86604931 | 12 | 86604931  | 0.0004207 | -0.1849  | 0.0006223 | MGAT4C(0)                         |
| rs17590608  | 6  | 167186024 | 0.0004208 | -0.08546 | 0.0003875 | RPS6KA2(0)                        |
| rs9551789   | 13 | 20171808  | 0.0004211 | -0.1199  | 0.0007797 | .                                 |
| rs11168     | 6  | 166755979 | 0.0004211 | 0.08453  | 0.000481  | SFT2D1(0)                         |

|              |    |           |           |          |           |                    |
|--------------|----|-----------|-----------|----------|-----------|--------------------|
| rs10998913   | 10 | 71441864  | 0.0004214 | 0.1213   | 0.0004637 | .                  |
| rs56253171   | 10 | 113325656 | 0.0004216 | 0.2245   | 0.0008645 | .                  |
| rs11256287   | 10 | 9685996   | 0.0004221 | 0.07408  | 0.0003041 | .                  |
| rs12694400   | 2  | 217809755 | 0.0004222 | 0.1682   | 0.0005697 | .                  |
| 5:151741858  | 5  | 151741858 | 0.0004222 | -0.1002  | 0.0007662 | .                  |
| rs2132683    | 6  | 99672014  | 0.0004222 | 0.07827  | 0.0003276 | .                  |
| rs35671351   | 6  | 110192347 | 0.0004224 | -0.07225 | 0.0005282 | .                  |
| rs155044     | 5  | 95965857  | 0.0004226 | 0.0778   | 0.0009018 | .                  |
| rs35247850   | 4  | 66137427  | 0.0004227 | 0.1587   | 0.0002443 | .                  |
| rs55993718   | 6  | 85411520  | 0.0004238 | 0.1758   | 0.0005287 | .                  |
| rs12428045   | 13 | 37177570  | 0.0004248 | 0.1016   | 0.0001992 | .                  |
| rs10061786   | 5  | 58561066  | 0.000425  | 0.113    | 0.0003102 | PDE4D(0)           |
| rs2829894    | 21 | 27132601  | 0.0004251 | -0.09925 | 0.0005318 | GABPA(0)           |
| 4:131302997  | 4  | 131302997 | 0.0004255 | 0.08485  | 0.0007593 | .                  |
| rs1825215    | 5  | 113259861 | 0.0004255 | 0.07929  | 0.0009591 | .                  |
| rs10035656   | 5  | 113260816 | 0.0004255 | 0.07929  | 0.0009591 | .                  |
| rs9487241    | 6  | 110189149 | 0.0004255 | -0.0722  | 0.0005898 | .                  |
| rs12498704   | 4  | 40690330  | 0.0004256 | -0.07472 | 0.0008488 | .                  |
| rs4604297    | 6  | 110209191 | 0.0004257 | -0.07168 | 0.0004886 | .                  |
| rs6481167    | 10 | 57428962  | 0.0004258 | -0.07362 | 0.000422  | .                  |
| rs6481168    | 10 | 57429244  | 0.0004258 | -0.07362 | 0.000422  | .                  |
| 12:108771090 | 12 | 108771090 | 0.0004268 | 0.2255   | 0.0006485 | .                  |
| 11:22933057  | 11 | 22933057  | 0.000427  | -0.0946  | 0.0005162 | .                  |
| rs12666602   | 7  | 109741317 | 0.000427  | 0.09714  | 0.0004032 | .                  |
| rs60097401   | 13 | 37176265  | 0.0004275 | 0.1044   | 0.0001368 | .                  |
| rs1551435    | 4  | 186840636 | 0.0004281 | 0.07365  | 0.0005356 | SORBS2(0)          |
| rs28511871   | 4  | 131315705 | 0.0004284 | 0.08408  | 0.0007508 | .                  |
| rs9508857    | 13 | 20285268  | 0.0004297 | -0.1073  | 0.0005974 | PSPC1(0)           |
| 3:68374205   | 3  | 68374205  | 0.0004303 | -0.1025  | 0.0005905 | FAM19A1(0)         |
| rs3847447    | 10 | 57458737  | 0.0004304 | -0.07384 | 0.0004723 | .                  |
| rs28379858   | 21 | 27961756  | 0.0004312 | 0.09912  | 0.0002594 | CYYR1(+16.18kb)    |
| rs2181304    | 13 | 37272398  | 0.0004314 | 0.07387  | 0.0003429 | C13orf36(+0.423kb) |
| rs855834     | 1  | 64357330  | 0.0004317 | 0.1547   | 0.0002135 | ROR1(0)            |
| rs2789052    | 6  | 121196068 | 0.0004324 | 0.152    | 0.0008406 | .                  |
| 13:20470581  | 13 | 20470581  | 0.0004329 | -0.1114  | 0.0006409 | .                  |
| rs9552038    | 13 | 20471003  | 0.0004329 | -0.1114  | 0.0006409 | .                  |
| rs1024080    | 3  | 145709954 | 0.0004332 | -0.07619 | 0.0006383 | .                  |
| rs7982289    | 13 | 111058696 | 0.0004333 | -0.3511  | 0.0005056 | COL4A2(0)          |
| rs6584894    | 10 | 110518607 | 0.0004336 | 0.08202  | 0.0004114 | .                  |
| rs5001406    | 11 | 16513084  | 0.0004336 | 0.1002   | 0.0003622 | SOX6(+15.17kb)     |
| rs11775170   | 8  | 71121143  | 0.0004336 | 0.08682  | 0.0004719 | NCOA2(0)           |
| 19:31012740  | 19 | 31012740  | 0.0004342 | -0.108   | 0.000629  | ZNF536(0)          |
| rs55945575   | 5  | 27569575  | 0.0004342 | 0.07571  | 0.0005201 | .                  |
| rs10787402   | 10 | 113503840 | 0.0004343 | 0.2074   | 0.0009161 | .                  |
| rs1772119    | 4  | 17248004  | 0.0004345 | 0.1664   | 0.0004267 | .                  |
| 4:17248741   | 4  | 17248741  | 0.0004345 | 0.1664   | 0.0004267 | .                  |
| rs56036314   | 4  | 17250559  | 0.0004345 | 0.1664   | 0.0004267 | .                  |

|              |    |           |           |          |           |                                  |
|--------------|----|-----------|-----------|----------|-----------|----------------------------------|
| rs17177983   | 4  | 17253530  | 0.0004345 | 0.1664   | 0.0004267 | .                                |
| rs12798430   | 11 | 16521393  | 0.0004346 | 0.1009   | 0.0003617 | .                                |
| 6:85357546   | 6  | 85357546  | 0.0004349 | 0.2092   | 0.0003842 | .                                |
| 6:85360352   | 6  | 85360352  | 0.0004349 | 0.2092   | 0.0003842 | .                                |
| rs62348940   | 5  | 31250594  | 0.000435  | 0.1902   | 0.0003398 | CDH6(0)                          |
| rs62348941   | 5  | 31250623  | 0.000435  | 0.1902   | 0.0003398 | CDH6(0)                          |
| rs4916767    | 5  | 88946226  | 0.0004352 | 0.1139   | 0.0005124 | .                                |
| rs28384822   | 1  | 171219212 | 0.0004353 | 0.2391   | 0.0005437 | FMO1(0)                          |
| rs10781102   | 9  | 75113795  | 0.0004353 | -0.07382 | 0.0005244 | .                                |
| rs4860997    | 4  | 41619472  | 0.0004354 | -0.08524 | 0.0004552 | LIMCH1(0)                        |
| rs9668434    | 12 | 64318733  | 0.0004358 | 0.08147  | 0.0002969 | SRGAP1(0)                        |
| rs9646605    | 18 | 69032825  | 0.0004359 | -0.1194  | 0.0002848 | .                                |
| rs12614017   | 2  | 207092292 | 0.0004361 | -0.1141  | 0.0008851 | GPR1(+9.521kb)                   |
| rs1179695    | 2  | 217760617 | 0.0004361 | 0.1745   | 0.0006511 | .                                |
| 17:33898679  | 17 | 33898679  | 0.0004366 | -0.1842  | 0.0008427 | SLFN14(+13.57kb) PEX12(-3.135kb) |
| rs4944048    | 11 | 74288326  | 0.0004371 | -0.09642 | 0.0003162 | POLD3(-15.3kb)                   |
| rs10872056   | 6  | 110190650 | 0.0004377 | -0.07096 | 0.0005958 | .                                |
| rs6933800    | 6  | 110190740 | 0.0004377 | -0.07096 | 0.0005958 | .                                |
| rs55755544   | 18 | 40183808  | 0.0004379 | -0.1018  | 0.0004792 | .                                |
| rs4244894    | 15 | 92073658  | 0.0004383 | 0.07203  | 0.0006068 | .                                |
| 1:176103293  | 1  | 176103293 | 0.0004384 | 0.226    | 0.0008001 | RFWD2(0)                         |
| rs856102     | 1  | 158892834 | 0.0004389 | -0.08885 | 0.000472  | PYHIN1(-8.507kb)                 |
| rs6490489    | 13 | 20416616  | 0.000439  | -0.09196 | 0.0009851 | ZMYM5(0)                         |
| rs3936639    | 10 | 57458863  | 0.0004392 | -0.07357 | 0.0004239 | .                                |
| rs62533062   | 8  | 71581982  | 0.0004393 | 0.1394   | 0.0004015 | XKR9(0) LACTB2(+0.59kb)          |
| rs3742536    | 14 | 52507429  | 0.0004396 | -0.08224 | 0.000617  | NID2(0)                          |
| rs3856067    | 1  | 181045443 | 0.0004398 | 0.1013   | 0.0007364 | IER5(-12.19kb)                   |
| rs16894738   | 4  | 17254450  | 0.0004402 | 0.1652   | 0.0004034 | .                                |
| 3:141141904  | 3  | 141141904 | 0.0004406 | 0.2182   | 0.0005649 | ZBTB38(0)                        |
| rs59737563   | 7  | 79165093  | 0.0004408 | -0.1484  | 0.0006997 | .                                |
| rs2008706    | 1  | 171147946 | 0.0004416 | 0.07454  | 0.000262  | FMO2(-6.441kb)                   |
| rs11661515   | 18 | 855099    | 0.0004422 | -0.07427 | 0.0007537 | .                                |
| rs13069009   | 3  | 9396051   | 0.0004425 | -0.1177  | 0.0004915 | THUMPD3(-8.665kb)                |
| rs988542     | 12 | 73838741  | 0.0004432 | 0.07598  | 0.0008817 | .                                |
| rs12668530   | 7  | 79168542  | 0.0004432 | -0.1498  | 0.0007476 | .                                |
| rs7069296    | 10 | 57451359  | 0.0004433 | -0.07537 | 0.0004149 | .                                |
| rs28560088   | 18 | 24969320  | 0.0004438 | 0.1189   | 0.0006343 | .                                |
| rs11172809   | 12 | 59293967  | 0.0004441 | 0.1738   | 0.0008034 | LRIG3(0)                         |
| rs4455725    | 7  | 66887032  | 0.0004442 | 0.07651  | 0.0007011 | .                                |
| rs9400341    | 6  | 110212022 | 0.0004445 | -0.07061 | 0.0005925 | .                                |
| rs55680450   | 10 | 113461561 | 0.0004447 | 0.2066   | 0.0009366 | .                                |
| 10:113464520 | 10 | 113464520 | 0.0004447 | 0.2066   | 0.0009366 | .                                |
| 10:113475015 | 10 | 113475015 | 0.0004447 | 0.2066   | 0.0009366 | .                                |
| 10:113480639 | 10 | 113480639 | 0.0004447 | 0.2066   | 0.0009366 | .                                |
| rs6534789    | 4  | 131304008 | 0.0004449 | 0.08026  | 0.0005333 | .                                |
| rs2018321    | 2  | 84807931  | 0.000445  | -0.08114 | 0.0007217 | DNHL1(0)                         |
| rs1582339    | 12 | 97751008  | 0.0004451 | -0.116   | 0.000344  | .                                |

|             |    |           |           |          |           |                        |
|-------------|----|-----------|-----------|----------|-----------|------------------------|
| rs2163994   | 13 | 113491029 | 0.0004451 | 0.07922  | 0.0003938 | ATP11A(0)              |
| rs2117190   | 13 | 113491148 | 0.0004451 | 0.07922  | 0.0003938 | ATP11A(0)              |
| rs16894739  | 4  | 17256096  | 0.0004453 | 0.164    | 0.0004521 | .                      |
| rs9843781   | 3  | 9396766   | 0.0004456 | -0.1171  | 0.0004967 | THUMPD3(-7.95kb)       |
| 6:85349746  | 6  | 85349746  | 0.0004456 | 0.2088   | 0.0003911 | .                      |
| rs28369794  | 1  | 171154303 | 0.0004457 | 0.093    | 0.0003203 | FMO2(-0.084kb)         |
| rs7774389   | 6  | 110190027 | 0.0004458 | -0.07101 | 0.0006162 | .                      |
| rs10260354  | 7  | 55883818  | 0.0004461 | -0.109   | 0.0009002 | sep/14(0)              |
| rs10740624  | 10 | 57461406  | 0.0004462 | -0.07392 | 0.0004745 | .                      |
| rs10889453  | 1  | 64359353  | 0.0004465 | 0.1543   | 0.000221  | ROR1(0)                |
| rs855821    | 1  | 64361363  | 0.0004465 | 0.1543   | 0.000221  | ROR1(0)                |
| rs2926719   | 8  | 71145689  | 0.0004468 | 0.08652  | 0.0004331 | NCOA2(0)               |
| rs12291876  | 11 | 133456988 | 0.000447  | -0.09439 | 0.0009492 | .                      |
| rs7898669   | 10 | 57429570  | 0.0004475 | -0.07367 | 0.0004256 | .                      |
| rs12351916  | 9  | 85483536  | 0.0004475 | -0.07877 | 0.0006699 | .                      |
| rs56344208  | 8  | 71517490  | 0.0004481 | 0.1398   | 0.0003658 | TRAM1(0)               |
| rs10473841  | 5  | 27482181  | 0.0004483 | 0.07492  | 0.0004859 | .                      |
| rs10472572  | 5  | 27484573  | 0.0004483 | 0.07492  | 0.0004859 | .                      |
| rs10045438  | 5  | 27484973  | 0.0004483 | 0.07492  | 0.0004859 | .                      |
| rs4131497   | 5  | 88893232  | 0.0004483 | 0.1652   | 0.000654  | .                      |
| rs4939634   | 18 | 48092989  | 0.0004484 | -0.07406 | 0.0005612 | MAPK4(0)               |
| rs6496815   | 15 | 92074265  | 0.0004485 | 0.07359  | 0.0007697 | .                      |
| rs7975033   | 12 | 73807517  | 0.0004496 | 0.07564  | 0.0008871 | .                      |
| rs2363061   | 12 | 73810593  | 0.0004496 | 0.07564  | 0.0008871 | .                      |
| rs1915293   | 12 | 73811639  | 0.0004496 | 0.07564  | 0.0008871 | .                      |
| rs6582151   | 12 | 73813659  | 0.0004496 | 0.07564  | 0.0008871 | .                      |
| rs6582152   | 12 | 73814053  | 0.0004496 | 0.07564  | 0.0008871 | .                      |
| rs10472571  | 5  | 27484175  | 0.0004502 | 0.07481  | 0.0005362 | .                      |
| rs867350    | 4  | 7265635   | 0.0004513 | -0.07647 | 0.0004086 | SORCS2(0)              |
| 18:57425254 | 18 | 57425254  | 0.0004515 | -0.2868  | 0.0007771 | .                      |
| 18:57425287 | 18 | 57425287  | 0.0004515 | -0.2868  | 0.0007771 | .                      |
| 18:57425420 | 18 | 57425420  | 0.0004515 | -0.2868  | 0.0007771 | .                      |
| rs10458206  | 6  | 7084214   | 0.0004521 | -0.07793 | 0.000434  | .                      |
| 21:15926785 | 21 | 15926785  | 0.000453  | 0.08849  | 0.0007531 | SAMSN1(+8.121kb)       |
| rs535702    | 9  | 12848269  | 0.0004534 | -0.07754 | 0.000338  | .                      |
| 13:99825075 | 13 | 99825075  | 0.0004535 | -0.1272  | 0.0007247 | .                      |
| rs17135638  | 6  | 2726475   | 0.0004552 | -0.1902  | 0.000948  | MYLK4(0)               |
| rs1361936   | 7  | 126931152 | 0.0004558 | -0.1086  | 0.0004502 | .                      |
| rs17164867  | 7  | 130008285 | 0.0004558 | 0.09266  | 0.0005787 | CPA5(0) CPA1(-12.07kb) |
| rs6460968   | 7  | 12621832  | 0.0004564 | 0.07286  | 0.0003622 | SCIN(0)                |
| rs35815316  | 9  | 4510509   | 0.0004568 | 0.0816   | 0.0005332 | SLC1A1(0)              |
| rs1156800   | 2  | 104613545 | 0.0004575 | -0.1047  | 0.000706  | .                      |
| rs542771    | 22 | 21031543  | 0.0004577 | 0.07494  | 0.000973  | .                      |
| rs9390697   | 6  | 101294431 | 0.0004588 | 0.1749   | 0.0007058 | ASCC3(0)               |
| rs9498409   | 6  | 101299966 | 0.0004588 | 0.1749   | 0.0007058 | ASCC3(0)               |
| rs9485417   | 6  | 101300038 | 0.0004588 | 0.1749   | 0.0007058 | ASCC3(0)               |
| rs7942395   | 11 | 35362952  | 0.0004589 | 0.07558  | 0.0003978 | SLC1A2(0)              |

|             |    |           |           |          |           |                               |
|-------------|----|-----------|-----------|----------|-----------|-------------------------------|
| rs7942586   | 11 | 35362979  | 0.0004589 | 0.07558  | 0.0003978 | SLC1A2(0)                     |
| rs56266092  | 7  | 49658433  | 0.0004595 | -0.08465 | 0.0005792 | .                             |
| rs653459    | 13 | 113491286 | 0.0004597 | 0.0789   | 0.0004004 | ATP11A(0)                     |
| rs35999015  | 13 | 20476003  | 0.0004602 | -0.1109  | 0.0006799 | .                             |
| rs17379710  | 11 | 35334668  | 0.000461  | 0.07306  | 0.0004076 | SLC1A2(0)                     |
| rs9542351   | 13 | 71048171  | 0.0004612 | 0.1002   | 0.000444  | .                             |
| rs485924    | 6  | 100002903 | 0.0004612 | 0.09144  | 0.0005809 | CCNC(0)                       |
| rs7095940   | 10 | 129222816 | 0.0004613 | 0.0843   | 0.0005031 | .                             |
| rs846979    | 6  | 108043257 | 0.0004616 | 0.104    | 0.0006651 | SCML4(0)                      |
| rs9551773   | 13 | 20165756  | 0.0004626 | -0.1192  | 0.0008677 | .                             |
| 1:33896147  | 1  | 33896147  | 0.0004627 | -0.1342  | 0.0003899 | .                             |
| 18:66384661 | 18 | 66384661  | 0.0004634 | 0.13     | 0.0001893 | TXNDC10(+2.308kb) CCDC102B(0) |
| rs1510429   | 8  | 14418703  | 0.0004634 | -0.1041  | 0.0009139 | SGCZ(0)                       |
| rs6015862   | 20 | 59428487  | 0.000464  | 0.1098   | 0.0001569 | .                             |
| rs6554260   | 4  | 56147944  | 0.0004641 | 0.1451   | 0.00067   | .                             |
| rs12670961  | 7  | 109741442 | 0.0004641 | 0.09694  | 0.0004351 | .                             |
| rs10484386  | 6  | 22115940  | 0.0004654 | 0.1906   | 0.000384  | .                             |
| rs1574191   | 10 | 57427215  | 0.0004657 | -0.07326 | 0.0004532 | .                             |
| rs57814648  | 5  | 114826291 | 0.0004657 | 0.07592  | 0.0005954 | .                             |
| rs12670532  | 7  | 79168570  | 0.0004657 | -0.1486  | 0.0007548 | .                             |
| rs7608639   | 2  | 79353898  | 0.0004661 | 0.07271  | 0.000543  | REG1A(+3.353kb)               |
| 8:71542471  | 8  | 71542471  | 0.0004662 | 0.1402   | 0.0003711 | LACTB2(-7.019kb)              |
| rs17698151  | 2  | 135543367 | 0.0004666 | -0.1041  | 0.000628  | .                             |
| rs7040076   | 9  | 110454242 | 0.000467  | 0.07317  | 0.0005821 | .                             |
| rs11185580  | 7  | 49652631  | 0.0004672 | -0.08501 | 0.0005685 | .                             |
| rs10899010  | 11 | 74286146  | 0.0004673 | -0.09614 | 0.0003449 | POLD3(-17.48kb)               |
| rs10975261  | 9  | 581163    | 0.0004673 | 0.08356  | 0.0008415 | KANK1(0)                      |
| rs7678740   | 4  | 56154350  | 0.0004686 | 0.1383   | 0.0006608 | .                             |
| 7:66887704  | 7  | 66887704  | 0.0004686 | 0.07564  | 0.0006312 | .                             |
| rs10785034  | 12 | 73834637  | 0.0004687 | 0.07585  | 0.0009027 | .                             |
| 8:13663878  | 8  | 13663878  | 0.0004687 | 0.225    | 0.0004794 | .                             |
| rs17443704  | 5  | 151668231 | 0.0004688 | -0.09935 | 0.000859  | .                             |
| 5:151668482 | 5  | 151668482 | 0.0004688 | -0.09935 | 0.000859  | .                             |
| rs9487240   | 6  | 110189125 | 0.0004692 | -0.07077 | 0.0006732 | .                             |
| rs2461900   | 10 | 57420539  | 0.0004696 | -0.07368 | 0.0005565 | .                             |
| 18:59695373 | 18 | 59695373  | 0.0004698 | 0.08566  | 0.0009415 | PIGN(-16.08kb)                |
| rs10785029  | 12 | 73805362  | 0.0004714 | 0.0755   | 0.0009162 | .                             |
| rs10748226  | 12 | 73805442  | 0.0004714 | 0.0755   | 0.0009162 | .                             |
| rs11761406  | 7  | 8463039   | 0.0004714 | -0.1259  | 0.0009796 | NXP1(-10.54kb)                |
| 10:71443184 | 10 | 71443184  | 0.0004716 | 0.1187   | 0.0005545 | .                             |
| rs4883872   | 13 | 71047035  | 0.0004719 | 0.09709  | 0.000437  | .                             |
| rs2829890   | 21 | 27123092  | 0.0004731 | -0.123   | 0.0005361 | GABPA(0) ATP5J(+15.13kb)      |
| rs9498414   | 6  | 101322976 | 0.0004733 | 0.1745   | 0.0007265 | ASCC3(0)                      |
| rs1432126   | 15 | 27322216  | 0.0004737 | 0.09136  | 0.0004822 | .                             |
| rs10506488  | 12 | 66993205  | 0.0004742 | 0.1241   | 0.0007312 | GRIP1(0)                      |
| rs17345188  | 2  | 104614645 | 0.0004743 | -0.1055  | 0.0008183 | .                             |
| 12:90548012 | 12 | 90548012  | 0.0004749 | -0.3219  | 0.0005428 | .                             |

|             |    |           |           |          |           |                           |
|-------------|----|-----------|-----------|----------|-----------|---------------------------|
| rs7326256   | 13 | 99788540  | 0.000475  | -0.1228  | 0.0007316 | .                         |
| rs62142360  | 2  | 31840489  | 0.0004753 | -0.3549  | 0.0006959 | .                         |
| rs62530823  | 8  | 71633826  | 0.0004753 | 0.1349   | 0.0003989 | XKR9(0)                   |
| rs11714204  | 3  | 36042177  | 0.0004758 | -0.2219  | 0.0004527 | .                         |
| 3:36043499  | 3  | 36043499  | 0.0004758 | -0.2219  | 0.0004527 | .                         |
| 3:36044572  | 3  | 36044572  | 0.0004758 | -0.2219  | 0.0004527 | .                         |
| 3:36044697  | 3  | 36044697  | 0.0004758 | -0.2219  | 0.0004527 | .                         |
| 3:36044712  | 3  | 36044712  | 0.0004758 | -0.2219  | 0.0004527 | .                         |
| 3:36044922  | 3  | 36044922  | 0.0004758 | -0.2219  | 0.0004527 | .                         |
| 21:40191389 | 21 | 40191389  | 0.0004759 | -0.0998  | 0.0003544 | ETS2(0)                   |
| rs660807    | 5  | 39848113  | 0.0004759 | -0.0733  | 0.0003087 | .                         |
| rs637420    | 1  | 64350084  | 0.000476  | 0.1529   | 0.000222  | ROR1(0)                   |
| 5:151671427 | 5  | 151671427 | 0.0004766 | -0.09918 | 0.0008764 | .                         |
| rs6919216   | 6  | 167190753 | 0.0004766 | -0.1032  | 0.0005282 | RPS6KA2(0)                |
| rs9457204   | 6  | 167192368 | 0.0004767 | -0.1061  | 0.0006707 | RPS6KA2(0)                |
| rs12741244  | 1  | 240936632 | 0.0004768 | 0.07938  | 0.0008266 | RGS7(-2.184kb)            |
| rs2837302   | 21 | 41303895  | 0.000477  | 0.07382  | 0.0006454 | PCP4(+2.573kb)            |
| rs12680132  | 8  | 71259927  | 0.0004771 | 0.08565  | 0.0005152 | NCOA2(0)                  |
| 2:135448651 | 2  | 135448651 | 0.0004772 | -0.1058  | 0.000659  | TMEM163(0)                |
| rs61950618  | 13 | 20446865  | 0.0004781 | -0.1118  | 0.0008076 | ZMYM5(+9.092kb)           |
| rs2349623   | 22 | 44943401  | 0.0004783 | -0.07742 | 0.0005187 | .                         |
| rs6788020   | 3  | 145711365 | 0.0004784 | -0.07582 | 0.0006862 | .                         |
| rs12691686  | 2  | 144403671 | 0.0004787 | 0.1341   | 0.0007978 | ARHGAP15(0)               |
| rs2984522   | 9  | 74993162  | 0.0004788 | 0.07312  | 0.0007334 | ZFAND5(+13kb)             |
| rs11610750  | 12 | 72278211  | 0.000479  | -0.1439  | 0.0005221 | TBC1D15(0)                |
| rs7953276   | 12 | 73821580  | 0.0004791 | 0.0753   | 0.0009412 | .                         |
| rs508996    | 11 | 66456933  | 0.0004792 | 0.08302  | 0.0004639 | SPTBN2(0) RBM4B(+11.66kb) |
| rs4856482   | 3  | 84064278  | 0.0004804 | -0.1342  | 0.0007057 | .                         |
| rs855839    | 1  | 64356438  | 0.0004805 | 0.1611   | 0.0002865 | ROR1(0)                   |
| rs2809859   | 9  | 18401113  | 0.0004814 | -0.09911 | 0.0007167 | .                         |
| 2:104610423 | 2  | 104610423 | 0.0004815 | -0.1044  | 0.0007654 | .                         |
| 7:79173651  | 7  | 79173651  | 0.0004824 | -0.1476  | 0.0007402 | .                         |
| rs1593682   | 2  | 126422318 | 0.0004827 | -0.09202 | 0.0006819 | .                         |
| rs61849861  | 10 | 71442964  | 0.0004837 | 0.1185   | 0.0005708 | .                         |
| rs16926600  | 10 | 71443150  | 0.0004837 | 0.1185   | 0.0005708 | .                         |
| rs12854997  | 13 | 20455374  | 0.0004837 | -0.1108  | 0.0008053 | ZMYM5(+17.6kb)            |
| rs353286    | 5  | 148792761 | 0.0004842 | 0.07144  | 0.0006736 | .                         |
| rs12655436  | 5  | 27478198  | 0.0004842 | 0.07464  | 0.0005186 | .                         |
| rs609669    | 6  | 100116299 | 0.0004851 | 0.09631  | 0.0008442 | .                         |
| rs56309043  | 18 | 24954026  | 0.0004852 | 0.1165   | 0.0006149 | .                         |
| rs13395589  | 2  | 13044651  | 0.0004853 | -0.1425  | 0.0006503 | .                         |
| 4:139539247 | 4  | 139539247 | 0.0004853 | 0.1156   | 0.000845  | .                         |
| rs56174716  | 18 | 24950504  | 0.0004855 | 0.1164   | 0.0006186 | .                         |
| rs4636064   | 6  | 110218283 | 0.0004856 | -0.07015 | 0.0006389 | .                         |
| rs7976446   | 12 | 106265447 | 0.0004858 | 0.07403  | 0.0006043 | .                         |
| rs12691687  | 2  | 144405248 | 0.0004863 | 0.134    | 0.0008048 | ARHGAP15(0)               |
| rs2516592   | 14 | 52503545  | 0.0004864 | -0.08359 | 0.0005961 | NID2(0)                   |



|             |    |           |           |          |                                           |
|-------------|----|-----------|-----------|----------|-------------------------------------------|
| rs4560644   | 6  | 48836797  | 0.0004866 | 0.3447   | 0.000558 .                                |
| 10:21576301 | 10 | 21576301  | 0.0004868 | 0.1902   | 0.0003831 .                               |
| rs532439    | 11 | 66469032  | 0.0004872 | 0.0848   | 0.0004027 SPTBN2(0)                       |
| rs2805929   | 9  | 18393114  | 0.0004872 | -0.1014  | 0.0007616 .                               |
| rs61117643  | 7  | 79163899  | 0.0004875 | -0.1516  | 0.0007415 .                               |
| rs10742237  | 11 | 30310659  | 0.0004878 | -0.08561 | 0.00043 .                                 |
| rs1870649   | 8  | 71260985  | 0.0004888 | 0.08011  | 0.0006604 NCOA2(0)                        |
| rs9372235   | 6  | 110199736 | 0.0004893 | -0.07107 | 0.0006653 .                               |
| rs6740609   | 2  | 79855622  | 0.0004894 | -0.08856 | 0.000556 CTNNA2(0)                        |
| rs4993699   | 7  | 66887996  | 0.0004897 | 0.07488  | 0.0006927 .                               |
| rs739299    | 22 | 35514825  | 0.0004898 | -0.07478 | 0.0005649 .                               |
| 13:20474599 | 13 | 20474599  | 0.0004899 | -0.1103  | 0.0007195 .                               |
| rs430780    | 14 | 36452235  | 0.0004899 | 0.08106  | 0.0006541 .                               |
| rs9696777   | 9  | 608009    | 0.0004902 | 0.08349  | 0.0007128 KANK1(0)                        |
| rs2967209   | 5  | 40060950  | 0.0004904 | -0.1009  | 0.0006152 .                               |
| 13:99833502 | 13 | 99833502  | 0.0004905 | -0.1235  | 0.0009286 UBAC2(-19.66kb)                 |
| rs35442969  | 7  | 66886959  | 0.0004905 | 0.07582  | 0.0007608 .                               |
| rs12254814  | 10 | 44131150  | 0.0004912 | 0.08248  | 0.0004839 ZNF485(+17.8kb) ZNF32(-8.156kb) |
| rs1958648   | 14 | 54339635  | 0.0004912 | -0.1078  | 0.0003591 .                               |
| rs2758460   | 9  | 74995813  | 0.0004916 | 0.0728   | 0.0007671 ZFAND5(+15.65kb)                |
| rs10873075  | 14 | 54340691  | 0.0004927 | -0.108   | 0.000396 .                                |
| 9:85990801  | 9  | 85990801  | 0.000493  | -0.1242  | 0.0003656 FRMD3(0)                        |
| rs10794860  | 10 | 2175702   | 0.0004942 | 0.072    | 0.0006715 .                               |
| rs59030572  | 9  | 110437382 | 0.0004943 | 0.07928  | 0.0006547 .                               |
| rs10506897  | 12 | 84058856  | 0.0004946 | 0.3056   | 0.0008241 .                               |
| rs62318174  | 4  | 131348026 | 0.0004946 | 0.08232  | 0.0008446 .                               |
| rs629241    | 5  | 177933945 | 0.0004946 | 0.07532  | 0.0008987 COL23A1(0)                      |
| rs1417271   | 9  | 85474844  | 0.0004946 | -0.07698 | 0.0007591 .                               |
| rs4487621   | 6  | 110230356 | 0.0004948 | 0.07293  | 0.0006728 .                               |
| 2:208136057 | 2  | 208136057 | 0.0004949 | -0.1154  | 0.0003769 .                               |
| 10:57583002 | 10 | 57583002  | 0.000495  | -0.1002  | 0.000886 .                                |
| 18:66384271 | 18 | 66384271  | 0.000495  | 0.1295   | 0.0001976 TXNDC10(+1.918kb) CCDC102B(0)   |
| 18:66384307 | 18 | 66384307  | 0.000495  | 0.1295   | 0.0001976 TXNDC10(+1.954kb) CCDC102B(0)   |
| rs9457217   | 6  | 167208952 | 0.000495  | -0.1014  | 0.000533 RPS6KA2(0)                       |
| rs7720392   | 5  | 31170385  | 0.0004951 | 0.2455   | 0.0007262 .                               |
| rs7852783   | 9  | 580715    | 0.0004951 | 0.08283  | 0.0008468 KANK1(0)                        |
| rs608647    | 11 | 84770221  | 0.0004953 | -0.09143 | 0.0006676 .                               |
| rs3000061   | 1  | 230888208 | 0.0004954 | -0.08364 | 0.0006817 CAPN9(0)                        |
| rs9401350   | 6  | 121211524 | 0.0004955 | 0.1515   | 0.0009064 .                               |
| rs9387901   | 6  | 121211820 | 0.0004955 | 0.1515   | 0.0009064 .                               |
| rs2852678   | 1  | 158864594 | 0.0004956 | -0.08509 | 0.0004334 .                               |
| rs28803557  | 7  | 55880211  | 0.0004961 | -0.1079  | 0.0009763 sep/14(0)                       |
| rs12415857  | 10 | 134714485 | 0.0004964 | 0.07756  | 0.0006035 .                               |
| rs11951177  | 5  | 27487031  | 0.0004964 | 0.07437  | 0.0005394 .                               |
| 9:86009959  | 9  | 86009959  | 0.0004972 | -0.11    | 0.0003412 FRMD3(0)                        |
| rs10816545  | 9  | 110422751 | 0.0004977 | -0.0994  | 0.0004799 .                               |
| rs7964705   | 12 | 73816760  | 0.0004979 | 0.07509  | 0.0009735 .                               |

|              |    |           |           |          |           |                               |
|--------------|----|-----------|-----------|----------|-----------|-------------------------------|
| rs2203976    | 12 | 73820610  | 0.0004979 | 0.07509  | 0.0009735 | .                             |
| rs10748227   | 12 | 73821381  | 0.0004979 | 0.07509  | 0.0009735 | .                             |
| rs14611      | 10 | 93043929  | 0.000498  | 0.1639   | 0.0007545 | PCGF5(0)                      |
| rs60950495   | 15 | 27313809  | 0.000498  | 0.09353  | 0.0003869 | .                             |
| rs6944045    | 7  | 79164896  | 0.000498  | -0.1486  | 0.0007304 | .                             |
| rs1017461    | 2  | 124853585 | 0.0004982 | 0.1727   | 0.0002469 | CNTNAP5(0)                    |
| rs2761688    | 9  | 116722833 | 0.0004982 | 0.07583  | 0.0007864 | ZNF618(0)                     |
| rs11851852   | 14 | 105168428 | 0.0004985 | -0.1245  | 0.0002978 | INF2(0) C14orf151(0)          |
| rs55745411   | 2  | 135570431 | 0.0004987 | -0.106   | 0.000718  | .                             |
| rs6484478    | 11 | 30306440  | 0.0005001 | -0.08547 | 0.0004409 | .                             |
| rs4849034    | 2  | 126420877 | 0.0005007 | -0.09156 | 0.000701  | .                             |
| rs61950624   | 13 | 20461763  | 0.000501  | -0.1103  | 0.0007298 | .                             |
| rs34172801   | 13 | 20468952  | 0.000501  | -0.1103  | 0.0007298 | .                             |
| rs2390240    | 13 | 99998235  | 0.0005014 | -0.1255  | 0.00078   | UBAC2(0)                      |
| rs7938931    | 11 | 74294220  | 0.0005022 | -0.09441 | 0.0004628 | POLD3(-9.408kb)               |
| rs134203     | 22 | 35515997  | 0.0005026 | -0.07445 | 0.0005928 | .                             |
| rs7240582    | 18 | 7956794   | 0.0005034 | 0.09041  | 0.0002544 | PTPRM(0)                      |
| rs2029975    | 14 | 52506070  | 0.0005035 | -0.08187 | 0.0007086 | NID2(0)                       |
| rs10139288   | 14 | 52506486  | 0.0005035 | -0.08187 | 0.0007086 | NID2(0)                       |
| rs1510428    | 8  | 14418331  | 0.0005035 | -0.1029  | 0.0009699 | SGCZ(0)                       |
| rs1402949    | 4  | 17242936  | 0.0005037 | 0.1626   | 0.000493  | .                             |
| rs4628499    | 1  | 240934479 | 0.0005041 | 0.08932  | 0.0004996 | RGS7(-4.337kb)                |
| rs10037765   | 5  | 73135543  | 0.0005042 | 0.07157  | 0.0004465 | RGNEF(0)                      |
| rs60373142   | 11 | 113208533 | 0.0005043 | 0.1204   | 0.0008716 | TTC12(0)                      |
| rs12243501   | 10 | 85109252  | 0.0005046 | 0.1813   | 0.0005733 | .                             |
| rs9551991    | 13 | 20305992  | 0.0005051 | -0.1055  | 0.0006965 | PSPC1(0)                      |
| rs420196     | 16 | 79240608  | 0.0005055 | -0.07278 | 0.0007451 | WWOX(0)                       |
| rs814680     | 9  | 116720752 | 0.0005055 | 0.07366  | 0.0009503 | ZNF618(0)                     |
| rs10978983   | 9  | 110426890 | 0.0005057 | -0.1036  | 0.0003641 | .                             |
| rs11004988   | 10 | 57487116  | 0.0005058 | -0.07295 | 0.0005404 | .                             |
| rs7357028    | 6  | 101399146 | 0.0005058 | 0.1311   | 0.0007376 | .                             |
| rs7339337    | 13 | 100005697 | 0.0005061 | -0.1253  | 0.0007972 | UBAC2(0)                      |
| rs12793829   | 11 | 16530053  | 0.0005064 | 0.09783  | 0.0003832 | .                             |
| rs1027832    | 3  | 78663956  | 0.0005069 | -0.0738  | 0.0004866 | ROBO1(0)                      |
| rs12592413   | 15 | 92076350  | 0.0005072 | 0.07115  | 0.0007791 | .                             |
| rs13070469   | 3  | 9396177   | 0.0005073 | -0.1156  | 0.0005763 | THUMPD3(-8.539kb)             |
| rs12539392   | 7  | 109720628 | 0.0005073 | 0.09376  | 0.0004764 | .                             |
| rs2533103    | 7  | 146394390 | 0.0005073 | -0.1094  | 0.0004701 | CNTNAP2(0)                    |
| rs7849626    | 9  | 74956781  | 0.0005074 | 0.07338  | 0.0009526 | ZFAND5(-9.559kb)              |
| rs2852680    | 1  | 158865514 | 0.0005075 | -0.08607 | 0.0004414 | .                             |
| rs12301769   | 12 | 72231313  | 0.0005077 | -0.1265  | 0.0005883 | TBC1D15(-2.225kb)             |
| rs10942252   | 5  | 27477815  | 0.0005078 | 0.07434  | 0.0005356 | .                             |
| rs6895283    | 5  | 27477937  | 0.0005078 | 0.07434  | 0.0005356 | .                             |
| rs7950907    | 11 | 16515050  | 0.0005086 | 0.09889  | 0.0003853 | SOX6(+17.13kb)                |
| 18:66384504  | 18 | 66384504  | 0.0005086 | 0.1292   | 0.0002042 | TXNDC10(+2.151kb) CCDC102B(0) |
| 14:105162807 | 14 | 105162807 | 0.0005087 | -0.1344  | 0.0004067 | INF2(0) C14orf151(0)          |
| rs11563399   | 7  | 126932903 | 0.0005087 | -0.1069  | 0.0004626 | .                             |

|             |    |           |           |          |           |                  |
|-------------|----|-----------|-----------|----------|-----------|------------------|
| rs7170769   | 15 | 92070205  | 0.0005091 | 0.07148  | 0.000853  | .                |
| rs10877182  | 12 | 59280742  | 0.0005093 | 0.176    | 0.0009374 | LRIG3(0)         |
| rs10869182  | 9  | 75113519  | 0.0005093 | -0.07196 | 0.0007659 | .                |
| rs10926352  | 1  | 240937073 | 0.0005094 | 0.07706  | 0.0008421 | RGS7(-1.743kb)   |
| rs5767138   | 22 | 48816917  | 0.00051   | 0.1461   | 0.0002565 | .                |
| rs2984524   | 9  | 74989643  | 0.0005101 | 0.07225  | 0.000745  | ZFAND5(+9.48kb)  |
| rs7993715   | 13 | 100008313 | 0.0005104 | -0.1254  | 0.0007749 | UBAC2(0)         |
| rs56222963  | 13 | 100009522 | 0.0005104 | -0.1254  | 0.0007749 | UBAC2(0)         |
| rs4550559   | 18 | 48088873  | 0.0005105 | -0.07553 | 0.000591  | MAPK4(0)         |
| rs4703486   | 5  | 34990484  | 0.0005107 | 0.08143  | 0.0003247 | AGXT2(-7.721kb)  |
| rs6907986   | 6  | 110227423 | 0.0005107 | -0.07016 | 0.0006581 | .                |
| rs11765078  | 7  | 8442235   | 0.0005114 | -0.1221  | 0.0009058 | .                |
| rs11750217  | 5  | 27570355  | 0.0005118 | 0.07503  | 0.0005816 | .                |
| rs10274904  | 7  | 49662445  | 0.0005119 | -0.08421 | 0.000536  | .                |
| 10:57582099 | 10 | 57582099  | 0.0005124 | -0.1001  | 0.0008999 | .                |
| rs7027436   | 9  | 110424737 | 0.0005125 | -0.09991 | 0.0003453 | .                |
| rs855851    | 1  | 64351518  | 0.0005128 | 0.1521   | 0.0002406 | ROR1(0)          |
| rs28566799  | 13 | 20442450  | 0.000513  | -0.1103  | 0.0008518 | ZMYM5(+4.677kb)  |
| rs9552028   | 13 | 20444249  | 0.000513  | -0.1103  | 0.0008518 | ZMYM5(+6.476kb)  |
| rs7317162   | 13 | 20454253  | 0.000513  | -0.1103  | 0.0008518 | ZMYM5(+16.48kb)  |
| rs12260619  | 10 | 85150440  | 0.0005133 | 0.1898   | 0.0007565 | .                |
| rs6492147   | 13 | 109423296 | 0.0005142 | 0.1198   | 0.0004029 | MYO16(0)         |
| 7:67494833  | 7  | 67494833  | 0.0005142 | -0.07245 | 0.0005232 | .                |
| rs856152    | 1  | 158887513 | 0.0005145 | -0.08504 | 0.0003943 | PYHIN1(-13.83kb) |
| rs16841110  | 4  | 7767059   | 0.0005149 | 0.1345   | 0.0006121 | AFAP1(0)         |
| rs6973551   | 7  | 36588659  | 0.0005153 | 0.1015   | 0.0009743 | AOAH(0)          |
| rs7896279   | 10 | 129211210 | 0.0005154 | 0.08359  | 0.0003794 | .                |
| rs7951786   | 11 | 16515076  | 0.0005155 | 0.09888  | 0.0003946 | SOX6(+17.16kb)   |
| rs4954168   | 2  | 135465073 | 0.0005157 | -0.1027  | 0.0007372 | TMEM163(0)       |
| rs12141786  | 1  | 33876151  | 0.0005158 | -0.1247  | 0.0003976 | .                |
| rs59767327  | 9  | 110437287 | 0.0005162 | 0.07894  | 0.0006966 | .                |
| rs2601870   | 4  | 86789857  | 0.0005163 | -0.07808 | 0.0009377 | ARHGAP24(0)      |
| rs9473663   | 6  | 49778621  | 0.0005164 | 0.07795  | 0.0005813 | .                |
| rs10942255  | 5  | 27501474  | 0.0005165 | 0.07478  | 0.0006136 | .                |
| 7:35595738  | 7  | 35595738  | 0.0005167 | -0.2627  | 0.000332  | .                |
| rs8101081   | 19 | 31049031  | 0.0005169 | -0.1012  | 0.0003763 | ZNF536(+0.066kb) |
| rs10825568  | 10 | 57450216  | 0.0005175 | -0.07397 | 0.0004939 | .                |
| rs7317117   | 13 | 71073228  | 0.0005175 | 0.09429  | 0.000395  | .                |
| rs28493969  | 21 | 27948627  | 0.0005175 | 0.1129   | 0.0005771 | CYYR1(+3.046kb)  |
| 5:27668162  | 5  | 27668162  | 0.0005177 | -0.08285 | 0.000968  | .                |
| rs13300244  | 9  | 74958635  | 0.0005177 | 0.07358  | 0.0009782 | ZFAND5(-7.705kb) |
| rs9399068   | 6  | 99633011  | 0.0005178 | -0.0838  | 0.0004783 | .                |
| rs10975385  | 9  | 607178    | 0.0005179 | 0.08329  | 0.000727  | KANK1(0)         |
| 3:146363778 | 3  | 146363778 | 0.000518  | 0.3579   | 0.0005759 | .                |
| rs292093    | 11 | 86086393  | 0.0005185 | -0.07262 | 0.00088   | CCDC81(0)        |
| rs11172717  | 12 | 59168763  | 0.0005191 | 0.1913   | 0.0008592 | .                |
| rs35486927  | 11 | 16528968  | 0.0005194 | 0.09895  | 0.0004188 | .                |

|             |    |           |           |          |           |                 |
|-------------|----|-----------|-----------|----------|-----------|-----------------|
| rs2293659   | 12 | 59267701  | 0.0005196 | 0.1931   | 0.0009224 | LRIG3(0)        |
| rs4901459   | 14 | 54335992  | 0.0005198 | -0.1252  | 0.0003168 | .               |
| rs919803    | 19 | 30987104  | 0.0005198 | -0.08232 | 0.0002408 | ZNF536(0)       |
| rs2049366   | 9  | 110454145 | 0.0005199 | 0.07251  | 0.0006435 | .               |
| rs35798670  | 9  | 85483010  | 0.00052   | -0.07767 | 0.0007491 | .               |
| rs13137768  | 4  | 35659062  | 0.0005202 | -0.1223  | 0.0008712 | .               |
| rs13137779  | 4  | 35659075  | 0.0005202 | -0.1223  | 0.0008712 | .               |
| rs6659977   | 1  | 33868066  | 0.0005209 | -0.1246  | 0.0004018 | .               |
| rs10157574  | 1  | 33871072  | 0.0005209 | -0.1246  | 0.0004018 | .               |
| 13:88041553 | 13 | 88041553  | 0.0005209 | 0.07396  | 0.0009875 | .               |
| rs35319667  | 13 | 37171058  | 0.0005211 | 0.09877  | 0.0002655 | .               |
| rs10869180  | 9  | 75092054  | 0.0005212 | -0.07236 | 0.0008269 | .               |
| rs2488688   | 10 | 29933714  | 0.0005216 | -0.07147 | 0.0005353 | SVIL(0)         |
| rs2029976   | 14 | 52505811  | 0.0005222 | -0.08163 | 0.0007521 | NID2(0)         |
| 12:59174247 | 12 | 59174247  | 0.0005224 | 0.1911   | 0.000888  | .               |
| rs13013759  | 2  | 40170491  | 0.0005228 | -0.1161  | 0.0006192 | .               |
| rs2984523   | 9  | 74992162  | 0.0005231 | 0.07242  | 0.0007915 | ZFAND5(+12kb)   |
| rs855835    | 1  | 64357060  | 0.0005232 | 0.1525   | 0.0002446 | ROR1(0)         |
| rs10825560  | 10 | 57427557  | 0.0005232 | -0.07272 | 0.000535  | .               |
| rs7338843   | 13 | 99997020  | 0.0005234 | -0.1251  | 0.0008091 | UBAC2(0)        |
| 2:212886000 | 2  | 212886000 | 0.0005234 | -0.1279  | 0.00087   | ERBB4(0)        |
| 2:212886423 | 2  | 212886423 | 0.0005234 | -0.1279  | 0.00087   | ERBB4(0)        |
| 2:212887394 | 2  | 212887394 | 0.0005234 | -0.1279  | 0.00087   | ERBB4(0)        |
| rs17770768  | 8  | 71930155  | 0.0005235 | 0.1306   | 0.0003966 | .               |
| rs58582179  | 4  | 35590926  | 0.0005238 | -0.09556 | 0.0009298 | .               |
| rs10179986  | 2  | 134864344 | 0.0005242 | -0.07683 | 0.0003755 | .               |
| rs56162973  | 13 | 99992047  | 0.0005245 | -0.1251  | 0.0008107 | UBAC2(0)        |
| rs4513310   | 2  | 84855366  | 0.0005245 | -0.07962 | 0.0008522 | .               |
| 8:87226963  | 8  | 87226963  | 0.0005246 | -0.09621 | 0.0006676 | SLC7A13(0)      |
| 18:67889395 | 18 | 67889395  | 0.0005254 | -0.2546  | 0.0009438 | RTTN(+16.43kb)  |
| 18:67890763 | 18 | 67890763  | 0.0005254 | -0.2546  | 0.0009438 | RTTN(+17.8kb)   |
| rs6560278   | 9  | 75094716  | 0.0005262 | -0.07185 | 0.0007942 | .               |
| rs4339991   | 10 | 45018336  | 0.0005266 | -0.1805  | 0.000566  | .               |
| rs627597    | 15 | 55767049  | 0.0005266 | -0.079   | 0.0006237 | DYX1C1(0)       |
| rs214574    | 6  | 18265944  | 0.0005266 | 0.1051   | 0.0009308 | DEK(+1.145kb)   |
| rs4536445   | 15 | 92073211  | 0.0005268 | 0.07076  | 0.0008079 | .               |
| rs62459059  | 7  | 79183335  | 0.0005269 | -0.1472  | 0.0008348 | .               |
| rs6855779   | 4  | 131345261 | 0.0005274 | 0.08189  | 0.0008956 | .               |
| rs2516593   | 14 | 52503369  | 0.0005276 | -0.07533 | 0.0007058 | NID2(0)         |
| rs2749875   | 14 | 52503396  | 0.0005276 | -0.07533 | 0.0007058 | NID2(0)         |
| rs9508921   | 13 | 20451818  | 0.000528  | -0.1102  | 0.0008784 | ZMYM5(+14.04kb) |
| rs9508922   | 13 | 20454181  | 0.000528  | -0.1102  | 0.0008784 | ZMYM5(+16.41kb) |
| rs1036735   | 2  | 104614524 | 0.000528  | -0.104   | 0.0008392 | .               |
| rs1417270   | 9  | 85475020  | 0.0005284 | -0.0776  | 0.0007493 | .               |
| rs11256280  | 10 | 9665353   | 0.0005287 | 0.07249  | 0.0004636 | .               |
| rs4747082   | 10 | 72466930  | 0.0005289 | -0.1356  | 0.0003671 | ADAMTS14(0)     |
| rs1934858   | 6  | 50106286  | 0.0005291 | 0.09719  | 0.0004766 | .               |

|             |    |           |           |          |           |                                   |
|-------------|----|-----------|-----------|----------|-----------|-----------------------------------|
| rs384228    | 16 | 79240436  | 0.0005295 | -0.07274 | 0.0007188 | WWOX(0)                           |
| rs13421788  | 2  | 13044658  | 0.0005307 | -0.1413  | 0.0007395 | .                                 |
| rs6582065   | 12 | 72293166  | 0.0005312 | -0.1234  | 0.0007289 | TBC1D15(0)                        |
| 10:21614386 | 10 | 21614386  | 0.0005313 | 0.1892   | 0.0003853 | .                                 |
| rs6972253   | 7  | 79169884  | 0.0005321 | -0.1459  | 0.0008341 | .                                 |
| rs6958455   | 7  | 79170110  | 0.0005321 | -0.1459  | 0.0008341 | .                                 |
| rs11766240  | 7  | 79170530  | 0.0005321 | -0.1459  | 0.0008341 | .                                 |
| rs10953897  | 7  | 79170663  | 0.0005321 | -0.1459  | 0.0008341 | .                                 |
| rs9386260   | 6  | 101329428 | 0.0005327 | 0.1744   | 0.0007701 | ASCC3(+0.204kb)                   |
| 18:66345768 | 18 | 66345768  | 0.0005331 | 0.1328   | 0.0002051 | TXNDC10(0)                        |
| rs4545169   | 9  | 137781941 | 0.0005331 | 0.1224   | 0.0004766 | FCN2(+2.575kb) FCN1(-19.49kb)     |
| rs3742127   | 13 | 99979452  | 0.000534  | -0.125   | 0.0008242 | UBAC2(0) EBI2(+19.76kb)           |
| 13:99980032 | 13 | 99980032  | 0.000534  | -0.125   | 0.0008242 | UBAC2(0)                          |
| rs2177365   | 10 | 57426592  | 0.0005351 | -0.07237 | 0.0005206 | .                                 |
| rs35335021  | 9  | 88220232  | 0.0005351 | 0.2117   | 0.0006761 | AGTPBP1(0)                        |
| rs7772251   | 6  | 35107169  | 0.0005353 | 0.07668  | 0.0003898 | TCP11(0)                          |
| rs2610868   | 10 | 55774892  | 0.0005355 | -0.08781 | 0.0007211 | PCDH15(0)                         |
| rs10014509  | 4  | 131389638 | 0.0005358 | -0.07982 | 0.0006046 | .                                 |
| rs2168144   | 1  | 110657532 | 0.000536  | -0.08984 | 0.0007083 | UBL4B(+0.963kb)                   |
| rs62179537  | 2  | 217808661 | 0.000536  | 0.1657   | 0.0007276 | .                                 |
| 2:217809399 | 2  | 217809399 | 0.000536  | 0.1657   | 0.0007276 | .                                 |
| rs7914545   | 10 | 57420576  | 0.0005363 | -0.07308 | 0.0006097 | .                                 |
| rs6657339   | 1  | 240951919 | 0.0005368 | 0.07617  | 0.0008135 | RGS7(0)                           |
| 2:212895680 | 2  | 212895680 | 0.0005369 | -0.1276  | 0.0008862 | ERBB4(0)                          |
| rs10857     | 11 | 74353371  | 0.0005371 | -0.09257 | 0.0004726 | POLD3(0)                          |
| rs35496464  | 10 | 50290505  | 0.0005373 | -0.1392  | 0.0008342 | C10orf72(0)                       |
| rs9687430   | 5  | 34994827  | 0.0005374 | 0.0824   | 0.0003678 | AGXT2(-3.378kb)                   |
| rs4239935   | 22 | 44942756  | 0.0005378 | -0.07684 | 0.0005469 | .                                 |
| rs2049975   | 22 | 44942850  | 0.0005378 | -0.07684 | 0.0005469 | .                                 |
| rs2049976   | 22 | 44942879  | 0.0005378 | -0.07684 | 0.0005469 | .                                 |
| rs12882643  | 14 | 62376045  | 0.0005379 | -0.08109 | 0.0009342 | .                                 |
| 8:71505220  | 8  | 71505220  | 0.000538  | 0.1373   | 0.0004334 | TRAM1(0)                          |
| 8:71505663  | 8  | 71505663  | 0.000538  | 0.1373   | 0.0004334 | TRAM1(0)                          |
| rs2957996   | 18 | 48051571  | 0.0005382 | 0.1076   | 0.0005512 | .                                 |
| rs6878567   | 5  | 27522224  | 0.0005387 | 0.07466  | 0.0006529 | .                                 |
| rs2852677   | 1  | 158863767 | 0.0005396 | -0.08426 | 0.0004818 | .                                 |
| rs515047    | 6  | 100125874 | 0.0005403 | 0.09488  | 0.0009955 | .                                 |
| 12:4811109  | 12 | 4811109   | 0.0005404 | -0.09581 | 0.0003126 | NDUFA9(+14.71kb) GALNT8(-18.64kb) |
| rs9552034   | 13 | 20451410  | 0.0005409 | -0.1099  | 0.0008962 | ZMYM5(+13.64kb)                   |
| 1:171073971 | 1  | 171073971 | 0.0005411 | 0.2336   | 0.000679  | FMO3(0)                           |
| 1:171074177 | 1  | 171074177 | 0.0005411 | 0.2336   | 0.000679  | FMO3(0)                           |
| rs28363540  | 1  | 171075407 | 0.0005411 | 0.2336   | 0.000679  | FMO3(0)                           |
| rs9384729   | 6  | 110229927 | 0.0005411 | 0.07254  | 0.0008622 | .                                 |
| rs10763240  | 10 | 57459418  | 0.0005415 | -0.07221 | 0.0005793 | .                                 |
| rs134209    | 22 | 35522842  | 0.0005416 | -0.07395 | 0.0006413 | .                                 |
| rs1037599   | 5  | 97783491  | 0.0005417 | 0.07203  | 0.0007561 | .                                 |
| rs6841167   | 4  | 37990581  | 0.000542  | 0.07401  | 0.0004425 | TBC1D1(0)                         |

|              |    |           |           |          |           |                                  |
|--------------|----|-----------|-----------|----------|-----------|----------------------------------|
| rs10966014   | 9  | 23671296  | 0.0005421 | -0.08158 | 0.0005603 | ELAVL2(-18.81kb)                 |
| rs10041105   | 5  | 27480630  | 0.0005424 | 0.07406  | 0.0005857 | .                                |
| rs13153897   | 5  | 27571603  | 0.0005425 | 0.07449  | 0.0006498 | .                                |
| 11:35122936  | 11 | 35122936  | 0.0005432 | -0.2204  | 0.0003923 | .                                |
| 4:112881140  | 4  | 112881140 | 0.0005437 | 0.1855   | 0.0006034 | .                                |
| rs309250     | 18 | 66381558  | 0.0005438 | 0.1281   | 0.0002193 | TXNDC10(0) CCDC102B(-0.932kb)    |
| rs2239305    | 16 | 4037918   | 0.0005439 | 0.08434  | 0.0009615 | ADCY9(0)                         |
| rs17686100   | 8  | 71507012  | 0.000544  | 0.1372   | 0.0004354 | TRAM1(0)                         |
| rs2610871    | 10 | 55773904  | 0.0005441 | -0.0871  | 0.0006887 | PCDH15(0)                        |
| 5:40099459   | 5  | 40099459  | 0.0005441 | -0.103   | 0.0005429 | .                                |
| rs62277160   | 3  | 146425905 | 0.0005445 | 0.3574   | 0.0005846 | .                                |
| rs3781884    | 11 | 113217364 | 0.0005447 | 0.1198   | 0.000928  | TTC12(0)                         |
| rs629413     | 15 | 53755084  | 0.0005448 | -0.08706 | 0.0004624 | .                                |
| 13:99994854  | 13 | 99994854  | 0.0005449 | -0.1249  | 0.0008179 | UBAC2(0)                         |
| rs407083     | 16 | 79242444  | 0.0005458 | -0.07234 | 0.0008755 | WWOX(0)                          |
| rs11681987   | 2  | 208275968 | 0.0005463 | -0.08485 | 0.0002328 | .                                |
| 10:85156461  | 10 | 85156461  | 0.0005469 | 0.1874   | 0.0006662 | .                                |
| rs11198479   | 10 | 85157625  | 0.0005469 | 0.1874   | 0.0006662 | .                                |
| rs13131650   | 4  | 35688954  | 0.0005471 | -0.1073  | 0.0007383 | .                                |
| rs1856165    | 10 | 110566771 | 0.0005473 | 0.07261  | 0.0008068 | .                                |
| 6:141394885  | 6  | 141394885 | 0.0005473 | 0.1798   | 0.0005496 | .                                |
| rs1437654    | 18 | 48097922  | 0.0005475 | -0.07326 | 0.0006989 | MAPK4(0)                         |
| rs855832     | 1  | 64357527  | 0.000548  | 0.1526   | 0.00027   | ROR1(0)                          |
| rs62171395   | 2  | 135476835 | 0.000548  | -0.1032  | 0.0006837 | TMEM163(+0.265kb)                |
| rs7689408    | 4  | 190344706 | 0.000548  | -0.07216 | 0.0006805 | .                                |
| rs330862     | 6  | 100008287 | 0.000548  | 0.08979  | 0.0007469 | CCNC(0)                          |
| rs56661887   | 4  | 35590897  | 0.0005484 | -0.09525 | 0.0009685 | .                                |
| rs61428470   | 4  | 35590900  | 0.0005484 | -0.09525 | 0.0009685 | .                                |
| rs12691685   | 2  | 144403649 | 0.0005487 | 0.1343   | 0.0008725 | ARHGAP15(0)                      |
| rs34314628   | 2  | 135455231 | 0.0005489 | -0.1042  | 0.0007221 | TMEM163(0)                       |
| 10:21579931  | 10 | 21579931  | 0.0005492 | 0.1789   | 0.0004045 | .                                |
| rs17867819   | 7  | 126938590 | 0.0005495 | -0.1073  | 0.0005486 | .                                |
| rs10825581   | 10 | 57469216  | 0.0005498 | -0.07274 | 0.0005689 | .                                |
| rs10047849   | 14 | 54338254  | 0.0005503 | -0.1071  | 0.0003647 | .                                |
| rs6490492    | 13 | 20479624  | 0.0005504 | -0.1105  | 0.0007754 | .                                |
| 14:105171985 | 14 | 105171985 | 0.0005504 | -0.1337  | 0.000392  | INF2(0) C14orf151(+0.84kb) ADSSL |
| rs7674979    | 4  | 35583495  | 0.0005505 | -0.09314 | 0.000945  | .                                |
| rs56390523   | 12 | 106304288 | 0.0005511 | -0.07344 | 0.0009429 | .                                |
| 12:108975623 | 12 | 108975623 | 0.0005511 | 0.1005   | 0.0003732 | TMEM119(-7.998kb) ISCU(+12.46kb) |
| rs368299     | 16 | 79247009  | 0.0005523 | -0.07686 | 0.000724  | WWOX(+0.445kb)                   |
| 14:105172529 | 14 | 105172529 | 0.0005524 | -0.1337  | 0.0003946 | INF2(0) C14orf151(+1.384kb) ADSS |
| 8:71475154   | 8  | 71475154  | 0.0005529 | 0.1392   | 0.0004315 | TRAM1(-10.52kb)                  |
| rs7993927    | 13 | 99986537  | 0.0005536 | -0.1246  | 0.0008543 | UBAC2(0)                         |
| rs9399696    | 6  | 101295873 | 0.0005536 | 0.1716   | 0.0008173 | ASCC3(0)                         |
| 4:186176454  | 4  | 186176454 | 0.0005539 | 0.3464   | 0.0008407 | SNX25(0)                         |
| rs58293390   | 8  | 71669442  | 0.000554  | 0.1401   | 0.0005009 | .                                |
| 10:85116728  | 10 | 85116728  | 0.0005542 | 0.1518   | 0.0007086 | .                                |

|             |    |           |           |          |           |                                  |
|-------------|----|-----------|-----------|----------|-----------|----------------------------------|
| rs3799692   | 6  | 49826126  | 0.0005542 | 0.085    | 0.0005247 | CRISP1(0)                        |
| 7:79163782  | 7  | 79163782  | 0.0005546 | -0.1531  | 0.0007923 | .                                |
| rs2984526   | 9  | 74987260  | 0.0005546 | 0.07179  | 0.0008207 | ZFAND5(+7.097kb)                 |
| rs2518525   | 1  | 158862449 | 0.0005547 | -0.084   | 0.0005035 | .                                |
| rs2852674   | 1  | 158862476 | 0.0005547 | -0.084   | 0.0005035 | .                                |
| rs2518528   | 1  | 158863774 | 0.0005547 | -0.084   | 0.0005035 | .                                |
| rs2518529   | 1  | 158865301 | 0.0005547 | -0.084   | 0.0005035 | .                                |
| rs2820140   | 1  | 158867289 | 0.0005547 | -0.084   | 0.0005035 | .                                |
| 13:99984775 | 13 | 99984775  | 0.0005548 | -0.1248  | 0.0008315 | UBAC2(0)                         |
| rs1888254   | 20 | 6419300   | 0.0005552 | 0.07356  | 0.000358  | .                                |
| rs1888255   | 20 | 6419320   | 0.0005552 | 0.07356  | 0.000358  | .                                |
| rs3886049   | 6  | 99895335  | 0.0005552 | 0.08937  | 0.0007216 | USP45(0)                         |
| rs3886048   | 6  | 99895392  | 0.0005552 | 0.08937  | 0.0007216 | USP45(0)                         |
| rs12526931  | 6  | 99897586  | 0.0005552 | 0.08937  | 0.0007216 | USP45(0)                         |
| rs12526934  | 6  | 99897622  | 0.0005552 | 0.08937  | 0.0007216 | USP45(0)                         |
| rs11756233  | 6  | 99899260  | 0.0005552 | 0.08937  | 0.0007216 | USP45(0)                         |
| rs11757056  | 6  | 99901957  | 0.0005552 | 0.08937  | 0.0007216 | USP45(0)                         |
| rs11754659  | 6  | 99902096  | 0.0005552 | 0.08937  | 0.0007216 | USP45(0)                         |
| rs11154862  | 6  | 99902611  | 0.0005552 | 0.08937  | 0.0007216 | USP45(0)                         |
| rs35535366  | 6  | 99904096  | 0.0005552 | 0.08937  | 0.0007216 | USP45(0)                         |
| rs17181306  | 6  | 99905520  | 0.0005552 | 0.08937  | 0.0007216 | USP45(0)                         |
| rs34947476  | 2  | 135486150 | 0.0005553 | -0.1032  | 0.0007059 | TMEM163(+9.58kb)                 |
| rs34405766  | 2  | 135486189 | 0.0005553 | -0.1032  | 0.0007059 | TMEM163(+9.619kb)                |
| rs12501496  | 4  | 190352243 | 0.0005553 | 0.08017  | 0.0006261 | .                                |
| rs7750567   | 6  | 167189674 | 0.0005557 | -0.1019  | 0.0006238 | RPS6KA2(0)                       |
| rs508614    | 5  | 39927851  | 0.0005558 | -0.0711  | 0.0003646 | .                                |
| rs17759131  | 8  | 71515255  | 0.0005559 | 0.1369   | 0.0004481 | TRAM1(0)                         |
| 8:71517318  | 8  | 71517318  | 0.0005559 | 0.1369   | 0.0004481 | TRAM1(0)                         |
| 8:71517424  | 8  | 71517424  | 0.0005559 | 0.1369   | 0.0004481 | TRAM1(0)                         |
| rs3923637   | 8  | 87231563  | 0.0005561 | -0.0972  | 0.000661  | SLC7A13(0)                       |
| rs2954344   | 8  | 87238494  | 0.0005562 | -0.09569 | 0.0007135 | SLC7A13(0)                       |
| rs2976186   | 8  | 87240007  | 0.0005562 | -0.09569 | 0.0007135 | SLC7A13(0)                       |
| rs6951422   | 7  | 109732506 | 0.0005566 | 0.09688  | 0.0004569 | .                                |
| rs11682480  | 2  | 208136668 | 0.0005567 | -0.1142  | 0.0004128 | .                                |
| rs1016402   | 2  | 208140317 | 0.0005567 | -0.1142  | 0.0004128 | .                                |
| rs4303702   | 2  | 208141493 | 0.0005567 | -0.1142  | 0.0004128 | .                                |
| rs11172790  | 12 | 59268740  | 0.0005569 | 0.1921   | 0.0009851 | LRIG3(0)                         |
| 4:56160884  | 4  | 56160884  | 0.0005584 | 0.1433   | 0.0008482 | .                                |
| rs9915021   | 17 | 33976619  | 0.000559  | -0.1491  | 0.0008128 | AP2B1(0)                         |
| rs13414268  | 2  | 84791629  | 0.0005593 | -0.07977 | 0.0007461 | DNHL1(0)                         |
| 18:66341658 | 18 | 66341658  | 0.0005597 | 0.1333   | 0.0002133 | TXNDC10(0)                       |
| rs9506398   | 13 | 20477221  | 0.0005614 | -0.1099  | 0.0008024 | .                                |
| rs2986384   | 1  | 230888588 | 0.0005626 | -0.08283 | 0.0007669 | CAPN9(0)                         |
| rs2109280   | 7  | 146392067 | 0.0005626 | -0.1081  | 0.0005295 | CNTNAP2(0)                       |
| rs1072972   | 7  | 146393317 | 0.0005626 | -0.1081  | 0.0005295 | CNTNAP2(0)                       |
| rs1072973   | 7  | 146393395 | 0.0005626 | -0.1081  | 0.0005295 | CNTNAP2(0)                       |
| rs1987169   | 11 | 66448044  | 0.0005636 | 0.08168  | 0.0006229 | SPTBN2(-4.678kb) RBM4B(+2.769kb) |

|              |    |           |           |          |           |                                  |
|--------------|----|-----------|-----------|----------|-----------|----------------------------------|
| rs17488799   | 4  | 35582506  | 0.0005638 | -0.09323 | 0.0009762 | .                                |
| rs546266     | 18 | 12492711  | 0.000564  | 0.09736  | 0.0005698 | SPIRE1(0)                        |
| rs9886465    | 8  | 71088730  | 0.0005641 | 0.08547  | 0.0006972 | NCOA2(0)                         |
| rs11973182   | 7  | 49659728  | 0.0005645 | -0.08312 | 0.0007081 | .                                |
| rs562753     | 6  | 100118912 | 0.0005648 | 0.0947   | 0.0009588 | .                                |
| 6:85377410   | 6  | 85377410  | 0.0005648 | 0.2028   | 0.000583  | .                                |
| rs4650987    | 1  | 177951803 | 0.0005649 | -0.08641 | 0.000815  | SEC16B(+12.75kb)                 |
| rs1916483    | 10 | 57560588  | 0.000565  | -0.09896 | 0.0009635 | .                                |
| rs9487253    | 6  | 110231687 | 0.000565  | -0.07076 | 0.0006945 | .                                |
| 10:93031066  | 10 | 93031066  | 0.0005658 | 0.1698   | 0.0008607 | PCGF5(0)                         |
| rs35222869   | 10 | 93031203  | 0.0005658 | 0.1698   | 0.0008607 | PCGF5(0)                         |
| 12:59158391  | 12 | 59158391  | 0.0005658 | 0.186    | 0.0008154 | .                                |
| rs491178     | 6  | 100116745 | 0.000566  | 0.095    | 0.0009866 | .                                |
| 11:22980614  | 11 | 22980614  | 0.0005661 | -0.09494 | 0.0006289 | .                                |
| rs17241417   | 13 | 20282946  | 0.0005661 | -0.1087  | 0.0008155 | PSPC1(0)                         |
| 10:101475680 | 10 | 101475680 | 0.0005668 | -0.1292  | 0.0004615 | ENTPD7(+4.678kb) CUTC(-16.28kb)  |
| 18:24961068  | 18 | 24961068  | 0.0005669 | 0.1148   | 0.0008276 | .                                |
| 8:71480283   | 8  | 71480283  | 0.0005674 | 0.1389   | 0.000444  | TRAM1(-5.389kb)                  |
| rs1863393    | 15 | 60242626  | 0.0005682 | -0.09142 | 0.0006429 | .                                |
| rs564733     | 6  | 100118449 | 0.0005682 | 0.09511  | 0.0009491 | .                                |
| 7:131864104  | 7  | 131864104 | 0.0005682 | -0.1875  | 0.0005775 | PLXNA4(0)                        |
| rs2888970    | 12 | 108989618 | 0.0005685 | 0.07449  | 0.0005451 | TMEM119(0)                       |
| rs7743320    | 6  | 49812839  | 0.0005685 | 0.08518  | 0.0005386 | CRISP1(0)                        |
| rs6140000    | 20 | 6435839   | 0.0005693 | -0.07408 | 0.0002345 | .                                |
| rs1331386    | 9  | 78781260  | 0.0005693 | -0.1101  | 0.0009063 | PCSK5(0)                         |
| rs7692271    | 4  | 35583363  | 0.0005696 | -0.09296 | 0.0009139 | .                                |
| rs4709112    | 6  | 166751839 | 0.0005698 | 0.08087  | 0.0005639 | SFT2D1(0)                        |
| rs211227     | 6  | 99001499  | 0.0005698 | 0.1161   | 0.0009019 | .                                |
| rs9371645    | 6  | 153209197 | 0.0005701 | 0.1397   | 0.0009143 | .                                |
| rs12034316   | 1  | 240961334 | 0.0005702 | 0.07463  | 0.0006669 | RGS7(0)                          |
| rs418017     | 16 | 79245145  | 0.0005705 | -0.07703 | 0.0009433 | WVOX(0)                          |
| rs57718059   | 14 | 105171619 | 0.0005706 | -0.133   | 0.0004103 | INF2(0) C14orf151(+0.474kb) ADSS |
| 10:72461515  | 10 | 72461515  | 0.000571  | -0.1353  | 0.0003924 | ADAMTS14(0)                      |
| rs9305313    | 21 | 28753885  | 0.0005711 | 0.2156   | 0.0005431 | .                                |
| 5:34975352   | 5  | 34975352  | 0.0005711 | 0.1342   | 0.0003327 | DNAJC21(+16.28kb)                |
| 5:34976858   | 5  | 34976858  | 0.0005711 | 0.1342   | 0.0003327 | DNAJC21(+17.79kb)                |
| rs4945844    | 6  | 110209802 | 0.0005713 | -0.0696  | 0.0007711 | .                                |
| rs11660095   | 18 | 48087043  | 0.0005726 | -0.07324 | 0.000695  | MAPK4(0)                         |
| rs872554     | 3  | 122877390 | 0.0005728 | -0.08728 | 0.0004952 | PDIA5(0)                         |
| rs11004985   | 10 | 57470008  | 0.0005729 | -0.07209 | 0.0005505 | .                                |
| 1:181060231  | 1  | 181060231 | 0.0005733 | 0.09988  | 0.0009934 | IER5(+0.252kb)                   |
| 7:55950063   | 7  | 55950063  | 0.0005733 | -0.09684 | 0.0005786 | sep/14(+19.58kb)                 |
| rs62357031   | 5  | 34991418  | 0.0005734 | 0.08074  | 0.0003633 | AGXT2(-6.787kb)                  |
| rs1363413    | 5  | 151754989 | 0.0005737 | -0.1029  | 0.000852  | NMUR2(-16.11kb)                  |
| rs28709789   | 7  | 130928244 | 0.0005747 | 0.1176   | 0.0001169 | .                                |
| rs17694970   | 18 | 40182606  | 0.0005756 | -0.09847 | 0.0006101 | .                                |
| rs56172004   | 4  | 170825458 | 0.0005759 | 0.07754  | 0.0007046 | .                                |



|             |    |           |           |          |           |                                |
|-------------|----|-----------|-----------|----------|-----------|--------------------------------|
| rs7086965   | 10 | 2167778   | 0.0005775 | 0.07046  | 0.0007782 | .                              |
| rs35836646  | 18 | 48088557  | 0.0005779 | -0.07317 | 0.0006656 | MAPK4(0)                       |
| 12:72294225 | 12 | 72294225  | 0.0005783 | -0.1229  | 0.0008363 | TBC1D15(0)                     |
| rs16874400  | 8  | 107339471 | 0.0005783 | -0.3458  | 0.0006038 | OXR1(0)                        |
| rs6998609   | 8  | 71097718  | 0.0005795 | 0.08524  | 0.000715  | NCOA2(0)                       |
| rs4380038   | 15 | 92073257  | 0.0005798 | 0.0702   | 0.0008911 | .                              |
| rs13361642  | 5  | 31250524  | 0.0005801 | 0.1903   | 0.0003961 | CDH6(0)                        |
| 12:86621680 | 12 | 86621680  | 0.0005807 | -0.1809  | 0.0008913 | MGAT4C(0)                      |
| rs62506890  | 8  | 71832173  | 0.0005812 | 0.1331   | 0.0004971 | .                              |
| rs16796     | 19 | 31030768  | 0.0005815 | -0.1007  | 0.0005646 | ZNF536(0)                      |
| rs10026321  | 4  | 131389611 | 0.0005815 | -0.07921 | 0.0006635 | .                              |
| 2:134867470 | 2  | 134867470 | 0.000582  | -0.08841 | 0.0006466 | .                              |
| rs4419487   | 4  | 131295407 | 0.0005822 | 0.08425  | 0.0007266 | .                              |
| 8:71519415  | 8  | 71519415  | 0.0005824 | 0.1364   | 0.0004708 | TRAM1(0)                       |
| 8:71519477  | 8  | 71519477  | 0.0005824 | 0.1364   | 0.0004708 | TRAM1(0)                       |
| rs13223447  | 7  | 66892129  | 0.0005826 | 0.07536  | 0.0008123 | .                              |
| rs7503503   | 17 | 60272298  | 0.0005831 | 0.1057   | 0.0009629 | .                              |
| rs1388505   | 3  | 68373086  | 0.0005832 | -0.1016  | 0.0007546 | FAM19A1(0)                     |
| rs7087129   | 10 | 1449140   | 0.0005837 | -0.07822 | 0.0008239 | ADARB2(0)                      |
| rs10255606  | 7  | 12624843  | 0.000584  | 0.07155  | 0.0004475 | SCIN(0)                        |
| rs2830290   | 21 | 27956507  | 0.0005843 | 0.1261   | 0.0005134 | CYYR1(+10.93kb)                |
| rs2871438   | 4  | 186155104 | 0.0005849 | 0.282    | 0.0007471 | SNX25(0)                       |
| rs4954177   | 2  | 135543933 | 0.0005851 | -0.1035  | 0.0008689 | .                              |
| rs746994    | 5  | 135483013 | 0.0005854 | 0.08953  | 0.0007385 | SMAD5(0)                       |
| 8:13645485  | 8  | 13645485  | 0.0005857 | 0.1387   | 0.000906  | .                              |
| rs7815668   | 8  | 41696104  | 0.0005863 | 0.07441  | 0.0004338 | .                              |
| rs55833158  | 3  | 72550920  | 0.0005877 | 0.07226  | 0.0004756 | .                              |
| 4:170824933 | 4  | 170824933 | 0.0005877 | 0.07739  | 0.0007662 | .                              |
| rs2049977   | 22 | 44943014  | 0.000588  | -0.07628 | 0.0005979 | .                              |
| 5:1096373   | 5  | 1096373   | 0.000589  | 0.1536   | 0.000558  | SLC12A7(0)                     |
| rs11749482  | 5  | 27564347  | 0.0005898 | 0.07404  | 0.0007191 | .                              |
| rs12188900  | 5  | 27568340  | 0.0005901 | 0.07416  | 0.0007189 | .                              |
| rs2954347   | 8  | 87241715  | 0.0005904 | -0.09598 | 0.0007703 | SLC7A13(0)                     |
| rs9459654   | 6  | 166744444 | 0.0005911 | 0.08073  | 0.0005512 | SFT2D1(0)                      |
| rs6927168   | 6  | 166745394 | 0.0005911 | 0.08073  | 0.0005512 | SFT2D1(0)                      |
| rs17283514  | 7  | 12616129  | 0.0005912 | 0.07116  | 0.0004907 | SCIN(0)                        |
| rs4939988   | 18 | 48088242  | 0.0005913 | -0.0731  | 0.0007294 | MAPK4(0)                       |
| 11:22983140 | 11 | 22983140  | 0.0005914 | -0.09076 | 0.000653  | .                              |
| 11:22983170 | 11 | 22983170  | 0.0005914 | -0.09076 | 0.000653  | .                              |
| 11:22983482 | 11 | 22983482  | 0.0005914 | -0.09076 | 0.000653  | .                              |
| 11:22984676 | 11 | 22984676  | 0.0005914 | -0.09076 | 0.000653  | .                              |
| 11:22985044 | 11 | 22985044  | 0.0005914 | -0.09076 | 0.000653  | .                              |
| 11:22985665 | 11 | 22985665  | 0.0005914 | -0.09076 | 0.000653  | .                              |
| 11:22985766 | 11 | 22985766  | 0.0005914 | -0.09076 | 0.000653  | .                              |
| rs927268    | 14 | 99000865  | 0.0005914 | 0.1711   | 0.000341  | .                              |
| rs481296    | 11 | 66419554  | 0.0005918 | 0.08073  | 0.0006977 | RBM4B(-12.91kb) RBM4(+5.614kb) |
| 12:84142565 | 12 | 84142565  | 0.0005934 | 0.2922   | 0.0008469 | .                              |

|             |    |           |           |          |           |                                  |
|-------------|----|-----------|-----------|----------|-----------|----------------------------------|
| rs4352795   | 7  | 49660459  | 0.0005946 | -0.08282 | 0.0007365 | .                                |
| rs1533050   | 4  | 131300102 | 0.0005952 | -0.07738 | 0.0007569 | .                                |
| 11:22981254 | 11 | 22981254  | 0.0005963 | -0.09073 | 0.0006574 | .                                |
| rs7963923   | 12 | 106258749 | 0.0005963 | 0.07383  | 0.000772  | .                                |
| rs672990    | 5  | 31384224  | 0.0005965 | 0.1005   | 0.000641  | RNASEN(-16.38kb)                 |
| rs5765799   | 22 | 44943987  | 0.0005967 | -0.07626 | 0.0005966 | .                                |
| rs10504821  | 8  | 87167184  | 0.0005968 | -0.0789  | 0.0006902 | ATP6V0D2(+0.73kb)                |
| rs802401    | 7  | 90614790  | 0.000597  | 0.07843  | 0.000766  | PFTK1(0)                         |
| rs7183689   | 15 | 80164190  | 0.0005972 | -0.07678 | 0.0007257 | MTHFS(0)                         |
| rs976596    | 10 | 2175957   | 0.0005973 | 0.07196  | 0.0008106 | .                                |
| 10:21609434 | 10 | 21609434  | 0.0005974 | 0.1831   | 0.0004345 | .                                |
| rs11749134  | 5  | 114826086 | 0.0005975 | 0.07455  | 0.0007796 | .                                |
| rs17394213  | 4  | 95476789  | 0.0005982 | 0.07276  | 0.0005533 | PDLIM5(0)                        |
| rs11618451  | 13 | 99937556  | 0.0005984 | -0.1236  | 0.0009255 | UBAC2(0) EBI2(-9.232kb)          |
| rs1531704   | 8  | 71501945  | 0.0005992 | 0.1368   | 0.0005733 | TRAM1(0)                         |
| rs6761929   | 2  | 135462534 | 0.0006    | -0.1026  | 0.0008879 | TMEM163(0)                       |
| rs4631531   | 9  | 75115405  | 0.0006015 | -0.07122 | 0.0009082 | .                                |
| rs4073227   | 9  | 75119808  | 0.0006015 | -0.07122 | 0.0009082 | TMC1(-16.91kb)                   |
| rs12186432  | 5  | 34993634  | 0.0006029 | 0.08046  | 0.0003871 | AGXT2(-4.571kb)                  |
| rs2984519   | 9  | 74997987  | 0.000603  | 0.07117  | 0.0009905 | ZFAND5(+17.82kb)                 |
| rs28579855  | 8  | 120870707 | 0.0006032 | 0.2981   | 0.0004914 | DSCC1(+2.558kb) DEPDC6(-15.19kb) |
| 8:120870743 | 8  | 120870743 | 0.0006032 | 0.2981   | 0.0004914 | DSCC1(+2.594kb) DEPDC6(-15.16kb) |
| rs28575743  | 8  | 120872055 | 0.0006032 | 0.2981   | 0.0004914 | DSCC1(+3.906kb) DEPDC6(-13.84kb) |
| rs28723382  | 8  | 120872081 | 0.0006032 | 0.2981   | 0.0004914 | DSCC1(+3.932kb) DEPDC6(-13.82kb) |
| 8:120872624 | 8  | 120872624 | 0.0006032 | 0.2981   | 0.0004914 | DSCC1(+4.475kb) DEPDC6(-13.28kb) |
| rs7843631   | 8  | 120873540 | 0.0006032 | 0.2981   | 0.0004914 | DSCC1(+5.391kb) DEPDC6(-12.36kb) |
| rs12386813  | 8  | 120874377 | 0.0006032 | 0.2981   | 0.0004914 | DSCC1(+6.228kb) DEPDC6(-11.52kb) |
| rs920778    | 12 | 54360232  | 0.0006041 | 0.07577  | 0.0006548 | HOXC13(+19.9kb) HOXC11(-6.677kb) |
| 8:87227725  | 8  | 87227725  | 0.0006042 | -0.09513 | 0.0007766 | SLC7A13(0)                       |
| rs2270934   | 5  | 34924857  | 0.0006043 | 0.1357   | 0.000331  | RAD1(+6.475kb) DNAJC21(-4.84kb)  |
| rs2045531   | 18 | 48087649  | 0.0006044 | -0.0731  | 0.0006864 | MAPK4(0)                         |
| rs34204436  | 13 | 20469315  | 0.000605  | -0.1088  | 0.0008786 | .                                |
| rs34907406  | 2  | 217774931 | 0.0006054 | 0.1721   | 0.0007792 | .                                |
| rs9404063   | 6  | 101387049 | 0.0006059 | 0.1627   | 0.0007288 | .                                |
| rs57402537  | 14 | 105173454 | 0.0006065 | -0.1327  | 0.0004358 | INF2(0) C14orf151(+2.309kb) ADSS |
| rs10001417  | 4  | 131392651 | 0.0006066 | -0.07909 | 0.0006716 | .                                |
| rs7592128   | 2  | 135482870 | 0.000607  | -0.101   | 0.0007914 | TMEM163(+6.3kb)                  |
| 8:13645241  | 8  | 13645241  | 0.000607  | 0.1383   | 0.000935  | .                                |
| rs12757317  | 1  | 230419308 | 0.0006072 | -0.08521 | 0.0003957 | GALNT2(+1.362kb)                 |
| rs7914742   | 10 | 57490951  | 0.0006098 | -0.07183 | 0.0006314 | .                                |
| rs2830292   | 21 | 27958588  | 0.0006098 | 0.09303  | 0.0003678 | CYR1(+13.01kb)                   |
| rs56185279  | 5  | 1615546   | 0.0006101 | -0.09872 | 0.0005692 | .                                |
| rs56124708  | 15 | 27324650  | 0.0006104 | 0.09217  | 0.0005442 | .                                |
| rs4887549   | 15 | 27324942  | 0.0006104 | 0.09217  | 0.0005442 | .                                |
| 2:40181517  | 2  | 40181517  | 0.0006106 | -0.1181  | 0.0006347 | .                                |
| rs10517354  | 4  | 35689019  | 0.0006121 | -0.1064  | 0.0008321 | .                                |
| rs11004980  | 10 | 57465535  | 0.0006129 | -0.07135 | 0.0006505 | .                                |

|             |    |           |           |          |           |                          |
|-------------|----|-----------|-----------|----------|-----------|--------------------------|
| rs508922    | 5  | 39851523  | 0.0006132 | -0.07156 | 0.0004334 | .                        |
| 21:39010677 | 21 | 39010677  | 0.0006137 | -0.143   | 0.000893  | KCNJ6(0)                 |
| rs10511996  | 9  | 75081322  | 0.000614  | -0.07195 | 0.0009476 | .                        |
| rs753700    | 9  | 74997042  | 0.0006141 | 0.07124  | 0.0009529 | ZFAND5(+16.88kb)         |
| rs1340843   | 6  | 50085467  | 0.0006151 | 0.09461  | 0.0006045 | .                        |
| rs10763243  | 10 | 57461608  | 0.0006156 | -0.07168 | 0.000701  | .                        |
| rs62508811  | 8  | 71705071  | 0.0006156 | 0.134    | 0.0005263 | .                        |
| rs365659    | 13 | 113493508 | 0.0006157 | 0.07661  | 0.0005489 | ATP11A(0)                |
| rs9999086   | 4  | 170803568 | 0.000616  | -0.07143 | 0.0005521 | .                        |
| rs10835642  | 11 | 30288269  | 0.0006161 | -0.08405 | 0.0005733 | .                        |
| rs4379811   | 11 | 30294760  | 0.0006161 | -0.08405 | 0.0005733 | .                        |
| rs3858428   | 11 | 30296550  | 0.0006161 | -0.08405 | 0.0005733 | .                        |
| rs9853140   | 3  | 84065192  | 0.0006163 | -0.1314  | 0.0008914 | .                        |
| 12:58366354 | 12 | 58366354  | 0.0006168 | -0.1722  | 0.0005343 | XRCC6BP1(+15.3kb)        |
| rs2326784   | 20 | 6431625   | 0.0006171 | -0.07209 | 0.0002856 | .                        |
| rs2210122   | 20 | 6431823   | 0.0006171 | -0.07209 | 0.0002856 | .                        |
| rs6054268   | 20 | 6431914   | 0.0006171 | -0.07209 | 0.0002856 | .                        |
| rs4947029   | 6  | 110205998 | 0.0006171 | -0.06901 | 0.0008448 | .                        |
| 8:13644566  | 8  | 13644566  | 0.0006178 | 0.1381   | 0.0009435 | .                        |
| rs1481902   | 8  | 13644746  | 0.0006178 | 0.1381   | 0.0009435 | .                        |
| rs35244596  | 2  | 217773285 | 0.0006182 | 0.1718   | 0.0008018 | .                        |
| rs62181785  | 2  | 217773767 | 0.0006182 | 0.1718   | 0.0008018 | .                        |
| rs62181787  | 2  | 217774117 | 0.0006182 | 0.1718   | 0.0008018 | .                        |
| rs17528634  | 5  | 58575409  | 0.0006182 | 0.1079   | 0.0005116 | PDE4D(0)                 |
| 5:58575626  | 5  | 58575626  | 0.0006182 | 0.1079   | 0.0005116 | PDE4D(0)                 |
| rs8034160   | 15 | 92074187  | 0.0006183 | 0.07044  | 0.0009592 | .                        |
| 8:71502575  | 8  | 71502575  | 0.0006184 | 0.1498   | 0.0004852 | TRAM1(0)                 |
| rs10106826  | 8  | 19156035  | 0.0006185 | -0.2129  | 0.0009304 | SH2D4A(-15.17kb)         |
| rs315702    | 9  | 114570174 | 0.0006186 | -0.07196 | 0.0008903 | .                        |
| rs11103877  | 12 | 86565587  | 0.0006193 | -0.1864  | 0.0008666 | MGAT4C(0)                |
| 6:47083888  | 6  | 47083888  | 0.0006194 | -0.1334  | 0.0006072 | .                        |
| rs2109372   | 7  | 90603594  | 0.0006196 | 0.0814   | 0.0007483 | PFTK1(0)                 |
| rs9374139   | 6  | 110229956 | 0.0006202 | 0.07144  | 0.0008398 | .                        |
| rs13381485  | 18 | 7950254   | 0.0006204 | 0.08925  | 0.0003332 | PTPRM(0)                 |
| rs11084491  | 19 | 30734108  | 0.0006206 | -0.07226 | 0.0004185 | .                        |
| rs6481178   | 10 | 57476455  | 0.0006208 | 0.07332  | 0.0005751 | .                        |
| rs2201281   | 12 | 86573081  | 0.0006212 | -0.1864  | 0.0008749 | MGAT4C(0)                |
| rs750785    | 2  | 129116922 | 0.0006213 | -0.07748 | 0.0004785 | .                        |
| rs61412217  | 8  | 71499109  | 0.0006213 | 0.1367   | 0.0004867 | TRAM1(0)                 |
| rs59288687  | 21 | 27112274  | 0.0006214 | -0.1227  | 0.0006799 | GABPA(0) ATP5J(+4.309kb) |
| rs55834259  | 5  | 27574418  | 0.0006221 | 0.07371  | 0.0008072 | .                        |
| rs4939635   | 18 | 48093257  | 0.0006225 | -0.07272 | 0.0007315 | MAPK4(0)                 |
| rs4939636   | 18 | 48093387  | 0.0006225 | -0.07272 | 0.0007315 | MAPK4(0)                 |
| rs12967875  | 18 | 48094298  | 0.0006225 | -0.07272 | 0.0007315 | MAPK4(0)                 |
| rs728682    | 18 | 48095354  | 0.0006225 | -0.07272 | 0.0007315 | MAPK4(0)                 |
| rs8089517   | 18 | 48096752  | 0.0006225 | -0.07272 | 0.0007315 | MAPK4(0)                 |
| rs1376477   | 3  | 63442932  | 0.0006225 | -0.1051  | 0.0007965 | SYNPR(0)                 |

|             |    |           |           |          |           |                                  |
|-------------|----|-----------|-----------|----------|-----------|----------------------------------|
| 4:7791308   | 4  | 7791308   | 0.0006226 | 0.1247   | 0.0008571 | AFAP1(0)                         |
| rs9659796   | 1  | 33830730  | 0.000623  | -0.1229  | 0.0004892 | PHC2(0)                          |
| rs4548978   | 18 | 48090702  | 0.000624  | -0.07277 | 0.0007591 | MAPK4(0)                         |
| rs2668537   | 4  | 54569983  | 0.0006245 | 0.072    | 0.0005217 | .                                |
| rs9487242   | 6  | 110189212 | 0.0006248 | -0.06884 | 0.000907  | .                                |
| rs7079407   | 10 | 129211739 | 0.000625  | 0.0853   | 0.0004087 | .                                |
| rs10217684  | 9  | 114447715 | 0.0006251 | -0.07141 | 0.0007999 | LOC552891(+15.21kb) GNG10(+15.19 |
| rs4073226   | 9  | 75119753  | 0.0006254 | -0.07107 | 0.0009382 | TMC1(-16.96kb)                   |
| rs10793795  | 5  | 114823240 | 0.0006257 | 0.0742   | 0.000802  | .                                |
| rs12153292  | 5  | 114823531 | 0.0006257 | 0.0742   | 0.000802  | .                                |
| rs12746334  | 1  | 235708538 | 0.0006263 | -0.1247  | 0.0009404 | GNG4(-2.446kb)                   |
| rs17802367  | 3  | 9380333   | 0.0006263 | -0.1148  | 0.0006864 | .                                |
| rs2976189   | 8  | 87235273  | 0.0006267 | -0.09493 | 0.0007628 | SLC7A13(0)                       |
| rs877707    | 4  | 7792662   | 0.0006269 | 0.1235   | 0.0008771 | AFAP1(0)                         |
| rs28623288  | 15 | 92076063  | 0.0006275 | 0.06985  | 0.0009742 | .                                |
| rs1506179   | 5  | 40077798  | 0.0006277 | -0.09919 | 0.0007123 | .                                |
| rs2533102   | 7  | 146394489 | 0.0006277 | -0.1074  | 0.000593  | CNTNAP2(0)                       |
| rs34793213  | 19 | 17011565  | 0.0006278 | 0.07483  | 0.0008978 | F2RL3(+8.735kb) CPAMD8(0)        |
| rs2350620   | 8  | 62497607  | 0.000628  | -0.07382 | 0.0003545 | ASPH(0)                          |
| rs9457222   | 6  | 167216478 | 0.0006282 | -0.1033  | 0.0005587 | RPS6KA2(0)                       |
| rs13236592  | 7  | 46090043  | 0.0006298 | -0.09815 | 0.0004624 | .                                |
| rs62530775  | 8  | 71605927  | 0.0006299 | 0.1302   | 0.0004779 | XKR9(0)                          |
| rs62530777  | 8  | 71606886  | 0.0006299 | 0.1302   | 0.0004779 | XKR9(0)                          |
| rs62171424  | 2  | 135549113 | 0.0006306 | -0.1036  | 0.0009134 | .                                |
| rs9508798   | 13 | 31131436  | 0.0006314 | -0.1143  | 0.0008399 | .                                |
| rs1546776   | 7  | 70449531  | 0.0006323 | 0.1387   | 0.0009505 | .                                |
| rs10022683  | 4  | 131314343 | 0.0006327 | -0.07976 | 0.0007027 | .                                |
| rs11618955  | 13 | 100015080 | 0.0006331 | -0.1239  | 0.0008873 | UBAC2(0)                         |
| rs3779647   | 8  | 30560887  | 0.0006334 | 0.07027  | 0.0005507 | GSR(0)                           |
| rs860636    | 1  | 158894050 | 0.0006336 | -0.08345 | 0.0006644 | PYHIN1(-7.291kb)                 |
| rs55929045  | 16 | 87041515  | 0.0006345 | 0.1768   | 0.0003109 | .                                |
| rs12509540  | 4  | 131297208 | 0.0006349 | -0.07593 | 0.0007999 | .                                |
| 5:41573163  | 5  | 41573163  | 0.000635  | -0.2719  | 0.0006983 | .                                |
| 5:41573275  | 5  | 41573275  | 0.000635  | -0.2719  | 0.0006983 | .                                |
| rs12563115  | 1  | 230417990 | 0.0006356 | -0.08642 | 0.0004383 | GALNT2(+0.044kb)                 |
| rs7630889   | 3  | 84084179  | 0.0006357 | -0.1308  | 0.0008958 | .                                |
| rs2081105   | 5  | 39908001  | 0.0006359 | -0.1032  | 0.0006774 | .                                |
| rs10175295  | 2  | 13048896  | 0.0006363 | -0.1496  | 0.0006869 | .                                |
| rs10504489  | 8  | 71857510  | 0.0006365 | 0.1346   | 0.0005002 | .                                |
| 19:31048593 | 19 | 31048593  | 0.0006374 | -0.09986 | 0.000487  | ZNF536(0)                        |
| 2:134869683 | 2  | 134869683 | 0.0006375 | -0.08769 | 0.0007044 | .                                |
| rs9398225   | 6  | 110216351 | 0.0006377 | -0.06864 | 0.0008273 | .                                |
| 9:85992350  | 9  | 85992350  | 0.0006387 | -0.1237  | 0.0004726 | FRMD3(0)                         |
| 10:21578237 | 10 | 21578237  | 0.000639  | 0.1853   | 0.0004407 | .                                |
| rs11683171  | 2  | 208229164 | 0.000639  | -0.08748 | 0.0002538 | .                                |
| rs62124498  | 2  | 13062200  | 0.0006394 | -0.1471  | 0.0006194 | .                                |
| rs28478106  | 4  | 131481371 | 0.0006394 | -0.08264 | 0.0005815 | .                                |

|             |    |           |           |          |           |                                  |
|-------------|----|-----------|-----------|----------|-----------|----------------------------------|
| 8:71489189  | 8  | 71489189  | 0.0006395 | 0.1363   | 0.0005052 | TRAM1(0)                         |
| rs7015016   | 8  | 71490446  | 0.0006395 | 0.1363   | 0.0005052 | TRAM1(0)                         |
| rs61065292  | 8  | 71495847  | 0.0006395 | 0.1363   | 0.0005052 | TRAM1(0)                         |
| rs36093720  | 18 | 7954026   | 0.0006406 | 0.08831  | 0.0003132 | PTPRM(0)                         |
| rs61950626  | 13 | 20464782  | 0.0006408 | -0.1094  | 0.000973  | .                                |
| rs9356478   | 6  | 166751416 | 0.0006414 | 0.07995  | 0.0006153 | SFT2D1(0)                        |
| rs1423261   | 5  | 39921531  | 0.0006416 | -0.09891 | 0.0007558 | .                                |
| rs4277117   | 11 | 66351549  | 0.0006419 | 0.08155  | 0.0006821 | CTS(+15.5kb) CCS(-9.14kb) CCDC8  |
| rs17128140  | 8  | 19153782  | 0.0006423 | -0.2123  | 0.0009658 | SH2D4A(-17.42kb)                 |
| rs7835531   | 8  | 19154158  | 0.0006423 | -0.2123  | 0.0009658 | SH2D4A(-17.05kb)                 |
| rs6941085   | 6  | 110213469 | 0.0006429 | -0.06859 | 0.0008343 | .                                |
| 13:99938100 | 13 | 99938100  | 0.0006431 | -0.1237  | 0.0009346 | UBAC2(0) EBI2(-8.688kb)          |
| rs4291146   | 7  | 67018078  | 0.0006431 | 0.1244   | 0.0006148 | .                                |
| rs12005469  | 9  | 75096610  | 0.0006439 | -0.07105 | 0.0009701 | .                                |
| 6:85361440  | 6  | 85361440  | 0.0006451 | 0.2019   | 0.0005984 | .                                |
| rs1916521   | 10 | 57416961  | 0.0006458 | -0.07369 | 0.0006798 | .                                |
| rs13167822  | 5  | 27579369  | 0.0006464 | 0.07405  | 0.0008059 | .                                |
| rs1496089   | 1  | 187291219 | 0.0006471 | 0.07848  | 0.0008441 | .                                |
| rs17128148  | 8  | 19156929  | 0.0006473 | -0.2146  | 0.0009231 | SH2D4A(-14.28kb)                 |
| rs9718857   | 7  | 46090767  | 0.0006475 | -0.09786 | 0.0004745 | .                                |
| rs3853390   | 3  | 173323278 | 0.0006478 | -0.1126  | 0.0009014 | NLGN1(0)                         |
| rs11831622  | 12 | 72232186  | 0.0006482 | -0.1231  | 0.0007686 | TBC1D15(-1.352kb)                |
| rs4404645   | 5  | 27579863  | 0.000649  | 0.07328  | 0.0008613 | .                                |
| rs62351179  | 5  | 27579894  | 0.000649  | 0.07328  | 0.0008613 | .                                |
| rs2876918   | 5  | 27579947  | 0.000649  | 0.07328  | 0.0008613 | .                                |
| rs2876919   | 5  | 27579997  | 0.000649  | 0.07328  | 0.0008613 | .                                |
| rs9302086   | 13 | 96422818  | 0.0006496 | -0.09092 | 0.000684  | DNAJC3(0)                        |
| rs12675129  | 8  | 14464688  | 0.0006496 | -0.0962  | 0.0009852 | SGCZ(0)                          |
| rs35045592  | 8  | 71247253  | 0.00065   | 0.08513  | 0.0006657 | NCOA2(0)                         |
| rs4823243   | 22 | 44943133  | 0.0006504 | -0.0757  | 0.0006845 | .                                |
| rs7740265   | 6  | 110229590 | 0.0006512 | 0.07201  | 0.0007281 | .                                |
| rs10751329  | 10 | 44142602  | 0.0006519 | 0.08108  | 0.0008294 | ZNF32(0)                         |
| 5:31178840  | 5  | 31178840  | 0.0006521 | 0.1846   | 0.0005285 | CDH6(-14.96kb)                   |
| rs3757918   | 8  | 30562121  | 0.0006523 | 0.07077  | 0.0005134 | GSR(0)                           |
| 5:34993184  | 5  | 34993184  | 0.0006529 | 0.07988  | 0.0004193 | AGXT2(-5.021kb)                  |
| 4:131377728 | 4  | 131377728 | 0.0006532 | -0.07967 | 0.0006631 | .                                |
| rs62351178  | 5  | 27579782  | 0.0006538 | 0.074    | 0.000905  | .                                |
| rs7012755   | 8  | 120876172 | 0.0006543 | 0.2997   | 0.0005279 | DSCC1(+8.023kb) DEPDC6(-9.727kb) |
| rs35188069  | 13 | 20461163  | 0.0006545 | -0.1086  | 0.0009344 | .                                |
| rs1317265   | 8  | 62498996  | 0.0006547 | -0.07361 | 0.0003704 | ASPH(0)                          |
| rs28695823  | 8  | 62503930  | 0.0006547 | -0.07361 | 0.0003704 | ASPH(0)                          |
| rs1988036   | 5  | 39848217  | 0.0006549 | -0.09425 | 0.0006694 | .                                |
| rs6451461   | 5  | 39849500  | 0.0006549 | -0.09425 | 0.0006694 | .                                |
| rs6020420   | 20 | 48901345  | 0.0006552 | 0.07468  | 0.0006471 | .                                |
| 2:208152424 | 2  | 208152424 | 0.0006557 | -0.1101  | 0.000456  | .                                |
| 11:22907380 | 11 | 22907380  | 0.000656  | -0.08849 | 0.0006458 | .                                |
| rs12055985  | 7  | 49649380  | 0.000656  | -0.08198 | 0.0008235 | .                                |

|             |    |           |           |          |           |                                 |
|-------------|----|-----------|-----------|----------|-----------|---------------------------------|
| rs11762861  | 7  | 49654764  | 0.000656  | -0.08198 | 0.0008235 | .                               |
| rs4947034   | 6  | 110219469 | 0.0006562 | -0.06968 | 0.0008129 | .                               |
| rs11239111  | 10 | 45016980  | 0.0006572 | -0.1591  | 0.000639  | .                               |
| rs9915141   | 17 | 13029654  | 0.0006575 | -0.1116  | 0.0009171 | .                               |
| rs1944935   | 11 | 74379166  | 0.0006577 | -0.09033 | 0.0005735 | .                               |
| rs6994556   | 8  | 38324616  | 0.0006577 | 0.07128  | 0.000697  | FGFR1(0)                        |
| rs62179773  | 2  | 217832809 | 0.0006586 | 0.1603   | 0.0008    | .                               |
| rs6774209   | 3  | 182059448 | 0.0006587 | 0.09055  | 0.0006708 | .                               |
| rs17289828  | 3  | 182060941 | 0.0006587 | 0.09055  | 0.0006708 | .                               |
| rs2811762   | 9  | 139785471 | 0.0006591 | -0.08825 | 0.0008475 | TRAF2(0)                        |
| rs2958001   | 18 | 48039914  | 0.0006594 | 0.1067   | 0.0006454 | .                               |
| rs9850746   | 3  | 145683422 | 0.0006602 | 0.07248  | 0.0006259 | .                               |
| rs59103566  | 9  | 85468166  | 0.0006602 | -0.07636 | 0.0009795 | .                               |
| rs4384034   | 9  | 607005    | 0.0006603 | 0.08164  | 0.0009368 | KANK1(0)                        |
| rs11742119  | 5  | 88780645  | 0.0006604 | 0.1387   | 0.0003554 | .                               |
| rs35291207  | 3  | 9391414   | 0.0006608 | -0.1142  | 0.000699  | THUMPD3(-13.3kb)                |
| rs35405132  | 3  | 9391420   | 0.0006608 | -0.1142  | 0.000699  | THUMPD3(-13.3kb)                |
| rs681880    | 5  | 41584737  | 0.0006609 | -0.1415  | 0.0008584 | .                               |
| rs1262923   | 6  | 16811646  | 0.000661  | -0.2125  | 0.0006618 | .                               |
| rs10866505  | 5  | 14006377  | 0.0006613 | -0.07437 | 0.0004267 | .                               |
| rs4738075   | 8  | 71087295  | 0.0006635 | 0.08443  | 0.0008162 | NCOA2(0)                        |
| rs10043361  | 5  | 40089985  | 0.0006637 | -0.1002  | 0.0006964 | .                               |
| 2:208152520 | 2  | 208152520 | 0.0006638 | -0.1099  | 0.0004573 | .                               |
| rs4326028   | 4  | 131305286 | 0.0006642 | -0.07565 | 0.0007935 | .                               |
| 6:47091338  | 6  | 47091338  | 0.0006647 | -0.1342  | 0.0006059 | .                               |
| 12:4777474  | 12 | 4777474   | 0.0006653 | -0.09687 | 0.0003636 | NDUFA9(0)                       |
| rs2122692   | 12 | 57510511  | 0.0006654 | 0.07095  | 0.0004379 | STAT6(+5.35kb) LRP1(-11.77kb)   |
| rs7756582   | 6  | 123248190 | 0.0006654 | 0.07292  | 0.0006426 | .                               |
| rs4737301   | 8  | 71120213  | 0.0006656 | 0.08757  | 0.0007181 | NCOA2(0)                        |
| 20:60957904 | 20 | 60957904  | 0.0006657 | -0.2119  | 0.000892  | RPS21(-4.216kb) LAMA5(+15.54kb) |
| rs10733936  | 10 | 57461353  | 0.0006658 | -0.07153 | 0.0007108 | .                               |
| rs2829879   | 21 | 27087290  | 0.0006658 | -0.09568 | 0.0008471 | JAM2(+0.055kb) ATP5J(-9.5kb)    |
| rs6516687   | 21 | 27086413  | 0.0006659 | -0.09565 | 0.0008891 | JAM2(0) ATP5J(-10.38kb)         |
| rs10763242  | 10 | 57461003  | 0.000666  | -0.07283 | 0.0006783 | .                               |
| rs7990340   | 13 | 34691840  | 0.0006666 | -0.07716 | 0.0006675 | .                               |
| rs7950287   | 11 | 16492118  | 0.0006674 | 0.09544  | 0.0004108 | SOX6(0)                         |
| 1:33896654  | 1  | 33896654  | 0.0006677 | -0.1304  | 0.0004702 | .                               |
| rs9498439   | 6  | 101404768 | 0.0006679 | 0.1689   | 0.0009161 | .                               |
| rs1358758   | 6  | 101411891 | 0.0006679 | 0.1689   | 0.0009161 | .                               |
| rs7097399   | 10 | 129218901 | 0.0006681 | 0.081    | 0.0007903 | .                               |
| rs334578    | 5  | 31366574  | 0.0006694 | 0.1008   | 0.0005887 | .                               |
| rs10857144  | 4  | 131479008 | 0.0006703 | -0.08246 | 0.000604  | .                               |
| 3:36529733  | 3  | 36529733  | 0.0006706 | -0.2398  | 0.0006011 | STAC(0)                         |
| 3:36532082  | 3  | 36532082  | 0.0006706 | -0.2398  | 0.0006011 | STAC(0)                         |
| rs11683797  | 2  | 208152159 | 0.000671  | -0.1117  | 0.0004665 | .                               |
| 2:208248404 | 2  | 208248404 | 0.0006715 | -0.08893 | 0.0002223 | .                               |
| rs11044882  | 12 | 19970967  | 0.0006717 | -0.06995 | 0.0008562 | .                               |

|             |    |           |           |          |           |                                  |
|-------------|----|-----------|-----------|----------|-----------|----------------------------------|
| rs4742480   | 9  | 844787    | 0.0006719 | 0.1453   | 0.000727  | DMRT1(0)                         |
| 5:34963884  | 5  | 34963884  | 0.0006726 | 0.1455   | 0.0003937 | DNAJC21(+4.815kb)                |
| rs1535254   | 20 | 60954661  | 0.0006728 | -0.2117  | 0.0009062 | RPS21(-7.459kb) LAMA5(+12.29kb)  |
| 20:60956238 | 20 | 60956238  | 0.0006728 | -0.2117  | 0.0009062 | RPS21(-5.882kb) LAMA5(+13.87kb)  |
| 20:60957608 | 20 | 60957608  | 0.0006728 | -0.2117  | 0.0009062 | RPS21(-4.512kb) LAMA5(+15.24kb)  |
| rs7757549   | 6  | 166744262 | 0.0006734 | 0.07996  | 0.0006324 | SFT2D1(0)                        |
| rs7893638   | 10 | 110518598 | 0.000674  | 0.0793   | 0.0006917 | .                                |
| rs4444009   | 10 | 110481202 | 0.0006742 | 0.07983  | 0.0005666 | .                                |
| rs8001952   | 13 | 20478941  | 0.0006744 | -0.1084  | 0.0009576 | .                                |
| rs13167823  | 5  | 27579371  | 0.0006746 | 0.07375  | 0.0008383 | .                                |
| rs11966381  | 6  | 167192071 | 0.0006754 | -0.102   | 0.0008046 | RPS6KA2(0)                       |
| rs62354163  | 5  | 27473229  | 0.0006755 | 0.074    | 0.0006256 | .                                |
| rs11969416  | 6  | 167192106 | 0.0006757 | -0.1003  | 0.0007686 | RPS6KA2(0)                       |
| rs13387517  | 2  | 217818312 | 0.0006765 | 0.1626   | 0.0008504 | .                                |
| 21:27148547 | 21 | 27148547  | 0.0006768 | -0.1291  | 0.0009757 | GABPA(+3.776kb)                  |
| rs12664068  | 6  | 101362098 | 0.0006772 | 0.1816   | 0.0007862 | .                                |
| rs2227356   | 19 | 17003405  | 0.0006775 | 0.07386  | 0.0009823 | SIN3B(+12.24kb) F2RL3(+0.575kb)  |
| 1:182808173 | 1  | 182808173 | 0.0006778 | 0.1899   | 0.0007526 | NPL(+9.585kb) DHX9(-0.277kb)     |
| 1:182813184 | 1  | 182813184 | 0.0006778 | 0.1899   | 0.0007526 | NPL(+14.6kb) DHX9(0)             |
| 1:182816909 | 1  | 182816909 | 0.0006778 | 0.1899   | 0.0007526 | NPL(+18.32kb) DHX9(0)            |
| 1:182819455 | 1  | 182819455 | 0.0006778 | 0.1899   | 0.0007526 | DHX9(0)                          |
| 1:182820265 | 1  | 182820265 | 0.0006778 | 0.1899   | 0.0007526 | DHX9(0)                          |
| rs7531833   | 1  | 182829727 | 0.0006778 | 0.1899   | 0.0007526 | DHX9(0)                          |
| 1:182830521 | 1  | 182830521 | 0.0006778 | 0.1899   | 0.0007526 | DHX9(0)                          |
| rs16859774  | 1  | 182832797 | 0.0006778 | 0.1899   | 0.0007526 | DHX9(0)                          |
| rs7513997   | 1  | 182834115 | 0.0006778 | 0.1899   | 0.0007526 | DHX9(0)                          |
| 1:182842449 | 1  | 182842449 | 0.0006778 | 0.1899   | 0.0007526 | DHX9(0)                          |
| 1:182851049 | 1  | 182851049 | 0.0006778 | 0.1899   | 0.0007526 | DHX9(0) C1orf14(-17.95kb)        |
| rs2642481   | 7  | 146391055 | 0.0006779 | -0.1058  | 0.0005889 | CNTNAP2(0)                       |
| rs9902964   | 17 | 32142960  | 0.000678  | 0.1612   | 0.0009534 | ACCN1(0)                         |
| rs6508008   | 18 | 48101830  | 0.0006784 | -0.07222 | 0.0008058 | MAPK4(0)                         |
| 8:71520915  | 8  | 71520915  | 0.0006786 | 0.1345   | 0.0005562 | TRAM1(+0.311kb)                  |
| rs55742988  | 8  | 71523477  | 0.0006786 | 0.1345   | 0.0005562 | TRAM1(+2.873kb)                  |
| 8:71525157  | 8  | 71525157  | 0.0006786 | 0.1345   | 0.0005562 | TRAM1(+4.553kb)                  |
| 8:71525880  | 8  | 71525880  | 0.0006786 | 0.1345   | 0.0005562 | TRAM1(+5.276kb)                  |
| rs16937156  | 8  | 71529295  | 0.0006786 | 0.1345   | 0.0005562 | TRAM1(+8.691kb)                  |
| 8:71537387  | 8  | 71537387  | 0.0006786 | 0.1345   | 0.0005562 | TRAM1(+16.78kb) LACTB2(-12.1kb)  |
| 8:71537450  | 8  | 71537450  | 0.0006786 | 0.1345   | 0.0005562 | TRAM1(+16.85kb) LACTB2(-12.04kb) |
| rs17686770  | 8  | 71546339  | 0.0006786 | 0.1345   | 0.0005562 | LACTB2(-3.151kb)                 |
| 8:71551154  | 8  | 71551154  | 0.0006786 | 0.1345   | 0.0005562 | LACTB2(0)                        |
| rs56714105  | 8  | 71552434  | 0.0006786 | 0.1345   | 0.0005562 | LACTB2(0)                        |
| rs58859533  | 8  | 71556723  | 0.0006786 | 0.1345   | 0.0005562 | LACTB2(0)                        |
| 8:71559487  | 8  | 71559487  | 0.0006786 | 0.1345   | 0.0005562 | LACTB2(0)                        |
| 8:71560544  | 8  | 71560544  | 0.0006786 | 0.1345   | 0.0005562 | LACTB2(0)                        |
| rs7243411   | 18 | 66353772  | 0.0006794 | 0.1305   | 0.0002544 | TXNDC10(0)                       |
| 18:66355854 | 18 | 66355854  | 0.0006794 | 0.1305   | 0.0002544 | TXNDC10(0)                       |
| rs13392734  | 2  | 208255975 | 0.0006794 | -0.08356 | 0.0002687 | .                                |

|             |    |           |           |          |           |                               |
|-------------|----|-----------|-----------|----------|-----------|-------------------------------|
| rs855836    | 1  | 64357048  | 0.0006801 | 0.1425   | 0.0004053 | ROR1(0)                       |
| rs13334756  | 16 | 8441073   | 0.0006803 | 0.2398   | 0.0009034 | .                             |
| rs766010    | 16 | 8441731   | 0.0006803 | 0.2398   | 0.0009034 | .                             |
| 16:8443279  | 16 | 8443279   | 0.0006803 | 0.2398   | 0.0009034 | .                             |
| rs427911    | 18 | 66371289  | 0.0006803 | 0.129    | 0.0002603 | TXNDC10(0) CCDC102B(-11.2kb)  |
| rs11689163  | 2  | 208231000 | 0.0006804 | -0.088   | 0.0002516 | .                             |
| rs11178960  | 12 | 72236864  | 0.0006812 | -0.1266  | 0.0009369 | TBC1D15(0)                    |
| rs62357032  | 5  | 34992451  | 0.0006814 | 0.07964  | 0.0004351 | AGXT2(-5.754kb)               |
| rs10023506  | 4  | 131362087 | 0.0006827 | -0.0793  | 0.0006606 | .                             |
| rs11755764  | 6  | 110201810 | 0.0006832 | -0.07005 | 0.0007766 | .                             |
| rs13169053  | 5  | 27574070  | 0.0006839 | 0.07322  | 0.0008681 | .                             |
| rs12155685  | 8  | 87218000  | 0.0006848 | -0.09445 | 0.0009993 | SLC7A13(-8.287kb)             |
| rs2518526   | 1  | 158863016 | 0.0006853 | -0.0833  | 0.0005778 | .                             |
| rs10978964  | 9  | 110414797 | 0.0006855 | -0.1006  | 0.000473  | .                             |
| rs2660139   | 10 | 55775187  | 0.000686  | -0.08548 | 0.0008725 | PCDH15(0)                     |
| rs13283760  | 9  | 85478332  | 0.0006867 | -0.07701 | 0.0009029 | .                             |
| 2:217840584 | 2  | 217840584 | 0.0006873 | 0.1625   | 0.0009386 | .                             |
| rs12795774  | 11 | 66381517  | 0.0006883 | 0.07959  | 0.0008432 | RBM14(-2.579kb) CCS(+8.027kb) |
| rs62506886  | 8  | 71827423  | 0.0006889 | 0.1406   | 0.0005971 | .                             |
| rs13437290  | 6  | 167211690 | 0.0006905 | -0.1003  | 0.0007598 | RPS6KA2(0)                    |
| rs12500657  | 4  | 131296215 | 0.0006906 | -0.07531 | 0.0008633 | .                             |
| rs856153    | 1  | 158888064 | 0.0006911 | -0.08232 | 0.0007197 | PYHIN1(-13.28kb)              |
| 1:225987509 | 1  | 225987509 | 0.0006921 | -0.08354 | 0.0005377 | SRP9(+9.345kb)                |
| 1:225987522 | 1  | 225987522 | 0.0006921 | -0.08354 | 0.0005377 | SRP9(+9.358kb)                |
| rs13236938  | 7  | 46090345  | 0.0006922 | -0.09733 | 0.0005045 | .                             |
| rs4246030   | 5  | 151906048 | 0.0006928 | -0.08067 | 0.0009101 | .                             |
| 5:151906598 | 5  | 151906598 | 0.0006928 | -0.08067 | 0.0009101 | .                             |
| rs7753589   | 6  | 167195051 | 0.0006929 | -0.1004  | 0.0007969 | RPS6KA2(0)                    |
| rs7753731   | 6  | 167195088 | 0.0006929 | -0.1004  | 0.0007969 | RPS6KA2(0)                    |
| rs7768138   | 6  | 167195096 | 0.0006929 | -0.1004  | 0.0007969 | RPS6KA2(0)                    |
| rs7768490   | 6  | 167195320 | 0.0006929 | -0.1004  | 0.0007969 | RPS6KA2(0)                    |
| 2:208237332 | 2  | 208237332 | 0.0006935 | -0.08816 | 0.0002566 | .                             |
| rs4430991   | 2  | 135491932 | 0.0006941 | -0.1007  | 0.0008754 | TMEM163(+15.36kb)             |
| rs3738757   | 1  | 110658236 | 0.0006949 | -0.08978 | 0.0008584 | UBL4B(+1.667kb)               |
| 16:8443739  | 16 | 8443739   | 0.0006949 | 0.2413   | 0.0008872 | .                             |
| 13:99904673 | 13 | 99904673  | 0.000695  | -0.1227  | 0.0009931 | UBAC2(0) GPR18(-2.293kb)      |
| rs7657981   | 4  | 131480721 | 0.0006959 | -0.08207 | 0.0006617 | .                             |
| rs730946    | 2  | 135465249 | 0.000696  | -0.1002  | 0.0009574 | TMEM163(0)                    |
| rs6752536   | 2  | 135467498 | 0.000696  | -0.1002  | 0.0009574 | TMEM163(0)                    |
| 1:112102328 | 1  | 112102328 | 0.0006981 | -0.3168  | 0.0009806 | ADORA3(0)                     |
| rs10443952  | 10 | 57431527  | 0.0006982 | -0.07102 | 0.0007175 | .                             |
| rs10069228  | 5  | 14011654  | 0.0006983 | -0.07401 | 0.0004877 | .                             |
| 16:56532606 | 16 | 56532606  | 0.0006992 | -0.4181  | 0.0007007 | BBS2(0)                       |
| rs8090603   | 18 | 66339445  | 0.0006992 | 0.131    | 0.0002701 | TXNDC10(-1.479kb)             |
| 8:71769387  | 8  | 71769387  | 0.0006993 | 0.144    | 0.0005846 | .                             |
| 5:151911831 | 5  | 151911831 | 0.0006994 | -0.07546 | 0.0008194 | .                             |
| 8:128628640 | 8  | 128628640 | 0.0006995 | -0.1097  | 0.0008231 | .                             |



|             |    |           |           |          |           |                      |
|-------------|----|-----------|-----------|----------|-----------|----------------------|
| rs12474491  | 2  | 142536317 | 0.0007    | 0.07151  | 0.0009171 | LRP1B(0)             |
| rs8029564   | 15 | 55772125  | 0.0007002 | -0.07662 | 0.0008539 | DYX1C1(0)            |
| 15:55772401 | 15 | 55772401  | 0.0007002 | -0.07662 | 0.0008539 | DYX1C1(0)            |
| rs904061    | 14 | 52504624  | 0.000701  | -0.08406 | 0.0008947 | NID2(0)              |
| rs4953902   | 2  | 134876049 | 0.000701  | -0.08594 | 0.0007391 | .                    |
| rs1930889   | 13 | 71055497  | 0.0007012 | 0.09049  | 0.0005569 | .                    |
| rs705519    | 1  | 64368535  | 0.0007016 | 0.1558   | 0.0003062 | ROR1(0)              |
| 4:131363162 | 4  | 131363162 | 0.000702  | -0.07846 | 0.0007456 | .                    |
| rs34833519  | 1  | 240958615 | 0.0007026 | 0.07376  | 0.0009737 | RGS7(0)              |
| 1:95460641  | 1  | 95460641  | 0.0007029 | -0.3101  | 0.0003591 | ALG14(0)             |
| rs976597    | 10 | 2176057   | 0.000703  | 0.07151  | 0.0009769 | .                    |
| rs2784095   | 9  | 139789093 | 0.0007032 | -0.08789 | 0.0009163 | TRAF2(0)             |
| rs4482781   | 4  | 131477813 | 0.0007037 | -0.08162 | 0.0006627 | .                    |
| rs3849079   | 5  | 14068431  | 0.0007048 | -0.07237 | 0.0008979 | .                    |
| rs4490785   | 7  | 49643412  | 0.0007056 | -0.08164 | 0.0008732 | .                    |
| rs10768131  | 11 | 35375280  | 0.0007062 | 0.06964  | 0.0005645 | SLC1A2(0)            |
| rs61924145  | 12 | 72272672  | 0.0007062 | -0.1203  | 0.0009665 | TBC1D15(0)           |
| rs61924146  | 12 | 72273157  | 0.0007062 | -0.1203  | 0.0009665 | TBC1D15(0)           |
| rs11830684  | 12 | 72283523  | 0.0007062 | -0.1203  | 0.0009665 | TBC1D15(0)           |
| rs11831203  | 12 | 72283785  | 0.0007062 | -0.1203  | 0.0009665 | TBC1D15(0)           |
| rs12302711  | 12 | 72284501  | 0.0007062 | -0.1203  | 0.0009665 | TBC1D15(0)           |
| rs12056163  | 7  | 49647593  | 0.000707  | -0.08161 | 0.000862  | .                    |
| rs34947765  | 12 | 4776918   | 0.0007078 | -0.09596 | 0.000496  | NDUFA9(0)            |
| rs2392949   | 10 | 57426710  | 0.0007083 | -0.07092 | 0.000683  | .                    |
| rs6035387   | 20 | 19576045  | 0.000709  | -0.0711  | 0.000819  | SLC24A3(0)           |
| 9:83498085  | 9  | 83498085  | 0.0007097 | -0.3316  | 0.0006432 | .                    |
| 8:71519614  | 8  | 71519614  | 0.0007105 | 0.134    | 0.0005839 | TRAM1(0)             |
| rs16869399  | 5  | 39906377  | 0.0007117 | -0.09892 | 0.0007555 | .                    |
| rs6038505   | 20 | 6433765   | 0.0007119 | -0.07123 | 0.0003293 | .                    |
| rs6038506   | 20 | 6433854   | 0.0007119 | -0.07123 | 0.0003293 | .                    |
| rs1389155   | 3  | 28165662  | 0.0007121 | -0.08288 | 0.0005633 | .                    |
| rs58098849  | 12 | 129555062 | 0.0007128 | -0.09333 | 0.0006111 | TMEM132D(-1.208kb)   |
| 2:217851814 | 2  | 217851814 | 0.0007134 | 0.1667   | 0.0009925 | .                    |
| 21:39004572 | 21 | 39004572  | 0.0007134 | -0.1419  | 0.0009632 | KCNJ6(0)             |
| 8:92198569  | 8  | 92198569  | 0.0007135 | -0.2685  | 0.0004286 | LRRRC69(0)           |
| 8:92213022  | 8  | 92213022  | 0.0007135 | -0.2685  | 0.0004286 | LRRRC69(0)           |
| rs2642483   | 7  | 146389259 | 0.0007137 | -0.1055  | 0.0006243 | CNTNAP2(0)           |
| rs3735221   | 7  | 12627102  | 0.0007142 | 0.07073  | 0.0004621 | SCIN(0)              |
| rs9459746   | 6  | 167192467 | 0.0007145 | -0.09988 | 0.0008193 | RPS6KA2(0)           |
| rs12432644  | 14 | 99517551  | 0.000715  | 0.09115  | 0.0009771 | .                    |
| rs6454392   | 6  | 85363434  | 0.000715  | 0.2355   | 0.0008605 | .                    |
| rs1131847   | 20 | 36965617  | 0.0007151 | 0.07223  | 0.0008598 | LBP(-9.267kb) BPI(0) |
| rs7428023   | 3  | 9384004   | 0.0007151 | -0.1137  | 0.0007617 | .                    |
| rs1933343   | 11 | 30310992  | 0.0007164 | -0.08302 | 0.0006685 | .                    |
| rs12800124  | 11 | 30239865  | 0.0007166 | -0.08304 | 0.0007495 | FSHB(-12.7kb)        |
| rs58644685  | 21 | 27147176  | 0.000717  | -0.1251  | 0.0009162 | GABPA(+2.405kb)      |
| 5:41551006  | 5  | 41551006  | 0.0007183 | -0.2571  | 0.0007291 | .                    |

|             |    |           |           |          |           |                                  |
|-------------|----|-----------|-----------|----------|-----------|----------------------------------|
| rs4832976   | 4  | 37984380  | 0.0007209 | 0.07215  | 0.0005991 | TBC1D1(0)                        |
| rs1991319   | 12 | 116061423 | 0.0007213 | -0.0701  | 0.0006753 | .                                |
| rs6663051   | 1  | 240960611 | 0.0007218 | 0.07372  | 0.0009736 | RGS7(0)                          |
| rs13260857  | 8  | 71042430  | 0.0007221 | 0.08482  | 0.0007749 | NCOA2(0)                         |
| rs4295521   | 6  | 110207354 | 0.0007227 | -0.06871 | 0.0008988 | .                                |
| rs12802250  | 11 | 16525522  | 0.0007231 | 0.09873  | 0.0005802 | .                                |
| 16:87028625 | 16 | 87028625  | 0.0007241 | 0.1748   | 0.0004969 | .                                |
| rs1348181   | 6  | 50239686  | 0.0007244 | 0.09274  | 0.0008606 | .                                |
| 11:22987398 | 11 | 22987398  | 0.0007253 | -0.08932 | 0.0007863 | .                                |
| 11:22987855 | 11 | 22987855  | 0.0007253 | -0.08932 | 0.0007863 | .                                |
| 11:22988043 | 11 | 22988043  | 0.0007253 | -0.08932 | 0.0007863 | .                                |
| rs56084509  | 11 | 22990726  | 0.0007253 | -0.08932 | 0.0007863 | .                                |
| rs2403792   | 11 | 22992093  | 0.0007253 | -0.08932 | 0.0007863 | .                                |
| 1:175650219 | 1  | 175650219 | 0.0007261 | -0.1601  | 0.0008206 | TNR(0)                           |
| rs4859218   | 3  | 182065295 | 0.0007262 | 0.08989  | 0.0007493 | .                                |
| rs3814563   | 10 | 44141987  | 0.0007267 | 0.0809   | 0.0009319 | ZNF32(0)                         |
| rs4737015   | 8  | 41696644  | 0.000727  | 0.07214  | 0.0005605 | .                                |
| rs2310951   | 4  | 131325553 | 0.0007273 | -0.07509 | 0.0008559 | .                                |
| rs11953669  | 5  | 27577544  | 0.0007278 | 0.07272  | 0.0009602 | .                                |
| rs1018555   | 9  | 114458552 | 0.0007283 | -0.07039 | 0.0009697 | C9orf84(0)                       |
| rs7545752   | 1  | 171148521 | 0.0007284 | 0.09135  | 0.0005722 | FMO2(-5.866kb)                   |
| rs9372234   | 6  | 110196704 | 0.0007284 | -0.06812 | 0.000989  | .                                |
| rs6046205   | 20 | 19576278  | 0.0007286 | -0.07123 | 0.0007956 | SLC24A3(0)                       |
| rs13066716  | 3  | 122876327 | 0.0007292 | -0.08576 | 0.0006317 | PDIA5(0)                         |
| rs12651958  | 5  | 13992717  | 0.0007294 | -0.07784 | 0.0007847 | .                                |
| rs2421709   | 1  | 171155632 | 0.0007299 | 0.07433  | 0.0005064 | FMO2(0)                          |
| rs17867811  | 7  | 126910307 | 0.00073   | -0.1107  | 0.0008592 | GRM8(+17.88kb)                   |
| 6:153202178 | 6  | 153202178 | 0.0007306 | 0.1398   | 0.0009514 | .                                |
| rs6457800   | 6  | 35102218  | 0.0007313 | 0.0737   | 0.0005437 | TCP11(0)                         |
| rs13180987  | 5  | 114826464 | 0.0007314 | 0.07321  | 0.0009718 | .                                |
| rs324013    | 12 | 57510661  | 0.0007316 | 0.07039  | 0.0004766 | STAT6(+5.5kb) LRP1(-11.62kb)     |
| 4:165444573 | 4  | 165444573 | 0.0007319 | -0.1676  | 0.0007151 | .                                |
| 18:66363159 | 18 | 66363159  | 0.000732  | 0.1291   | 0.0002822 | TXNDC10(0) CCDC102B(-19.33kb)    |
| rs35220888  | 2  | 135479582 | 0.000732  | -0.1012  | 0.0009498 | TMEM163(+3.012kb)                |
| rs16877990  | 7  | 13827828  | 0.0007327 | -0.08566 | 0.000845  | .                                |
| rs2852681   | 1  | 158867118 | 0.0007338 | -0.0821  | 0.0006984 | .                                |
| rs2276161   | 2  | 135470735 | 0.0007354 | -0.1003  | 0.0009859 | TMEM163(0)                       |
| 17:32139841 | 17 | 32139841  | 0.0007356 | 0.1302   | 0.0009166 | ACCN1(0)                         |
| rs1129315   | 7  | 12626638  | 0.0007359 | 0.07061  | 0.0004831 | SCIN(0)                          |
| rs9656932   | 8  | 120875826 | 0.0007378 | 0.2967   | 0.0005931 | DSCC1(+7.677kb) DEPDC6(-10.07kb) |
| rs7239786   | 18 | 7947846   | 0.0007379 | 0.08776  | 0.000348  | PTPRM(0)                         |
| 5:41587729  | 5  | 41587729  | 0.000738  | -0.2448  | 0.000738  | .                                |
| rs4325231   | 10 | 57495010  | 0.0007386 | 0.0723   | 0.0006467 | .                                |
| rs4590771   | 10 | 57495039  | 0.0007386 | 0.0723   | 0.0006467 | .                                |
| rs855824    | 1  | 64361979  | 0.0007388 | 0.1414   | 0.0003995 | ROR1(0)                          |
| rs4894713   | 3  | 175042776 | 0.0007389 | -0.08588 | 0.0009657 | NAALADL2(0)                      |
| rs12884889  | 14 | 35840221  | 0.000739  | 0.2644   | 0.000756  | .                                |

|              |    |           |           |          |           |                          |
|--------------|----|-----------|-----------|----------|-----------|--------------------------|
| rs12341787   | 9  | 110413656 | 0.0007392 | -0.1001  | 0.0004984 | .                        |
| 13:113507609 | 13 | 113507609 | 0.0007395 | 0.07867  | 0.0005741 | ATP11A(0)                |
| rs7074747    | 10 | 57497418  | 0.0007396 | 0.07287  | 0.000661  | .                        |
| rs11875705   | 18 | 46141835  | 0.0007396 | 0.08478  | 0.0005202 | KIAA0427(0)              |
| rs2784088    | 9  | 139790471 | 0.0007401 | -0.08755 | 0.0009619 | TRAF2(0)                 |
| rs2784087    | 9  | 139790522 | 0.0007401 | -0.08755 | 0.0009619 | TRAF2(0)                 |
| rs10177660   | 2  | 217822359 | 0.0007406 | 0.1614   | 0.0009287 | .                        |
| rs9395579    | 6  | 50246083  | 0.0007412 | 0.0926   | 0.0008858 | .                        |
| rs2811759    | 9  | 139790204 | 0.0007417 | -0.08753 | 0.000957  | TRAF2(0)                 |
| 2:208135651  | 2  | 208135651 | 0.0007419 | -0.1105  | 0.0005141 | .                        |
| rs17862349   | 7  | 126940728 | 0.0007419 | -0.1048  | 0.0007623 | .                        |
| 18:2384403   | 18 | 2384403   | 0.0007428 | -0.1148  | 0.000971  | .                        |
| rs2234724    | 1  | 171155032 | 0.000743  | 0.2107   | 0.0006805 | FMO2(0)                  |
| rs28369809   | 1  | 171157045 | 0.000743  | 0.2107   | 0.0006805 | FMO2(0)                  |
| rs28369811   | 1  | 171157440 | 0.000743  | 0.2107   | 0.0006805 | FMO2(0)                  |
| rs4861175    | 4  | 42237898  | 0.0007432 | 0.09031  | 0.0007326 | .                        |
| rs6503410    | 17 | 43094140  | 0.0007433 | -0.0795  | 0.0005976 | DCAKD(-6.565kb)          |
| rs12037640   | 1  | 225978787 | 0.0007437 | -0.08165 | 0.0005884 | SRP9(+0.623kb)           |
| rs12691870   | 2  | 135453545 | 0.0007437 | -0.09803 | 0.000825  | TMEM163(0)               |
| rs855850     | 1  | 64352117  | 0.0007441 | 0.147    | 0.0003674 | ROR1(0)                  |
| rs2542203    | 2  | 217823089 | 0.0007446 | 0.1613   | 0.0009381 | .                        |
| rs9292201    | 5  | 58582613  | 0.0007446 | 0.1063   | 0.0006103 | PDE4D(0)                 |
| 17:52686011  | 17 | 52686011  | 0.0007452 | -0.2992  | 0.0008514 | .                        |
| rs6989331    | 8  | 41697078  | 0.0007453 | 0.07156  | 0.0006118 | .                        |
| rs9999066    | 4  | 131474199 | 0.0007458 | -0.08096 | 0.000708  | .                        |
| rs946006     | 13 | 113496566 | 0.0007461 | 0.07563  | 0.0006121 | ATP11A(0)                |
| rs7819507    | 8  | 128596940 | 0.0007467 | -0.101   | 0.0006822 | .                        |
| 7:43947823   | 7  | 43947823  | 0.0007471 | 0.2142   | 0.0005798 | URG4(0) UBE2D4(-18.22kb) |
| rs7072976    | 10 | 14658464  | 0.0007474 | 0.1295   | 0.0006046 | FAM107B(0)               |
| rs4823241    | 22 | 44942067  | 0.0007478 | -0.07515 | 0.0008234 | .                        |
| 8:71542600   | 8  | 71542600  | 0.0007483 | 0.1334   | 0.0006197 | LACTB2(-6.89kb)          |
| 8:71544283   | 8  | 71544283  | 0.0007483 | 0.1334   | 0.0006197 | LACTB2(-5.207kb)         |
| rs61653870   | 5  | 27620392  | 0.0007487 | -0.08205 | 0.0009342 | .                        |
| rs1011442    | 7  | 116088301 | 0.0007487 | -0.07495 | 0.0008885 | .                        |
| rs12344206   | 9  | 110421175 | 0.0007487 | -0.09607 | 0.0005871 | .                        |
| rs11926839   | 3  | 72551581  | 0.0007495 | 0.07024  | 0.0005781 | .                        |
| rs9307629    | 4  | 131387002 | 0.0007499 | -0.07774 | 0.0008552 | .                        |
| rs7086617    | 10 | 45007607  | 0.0007513 | -0.1569  | 0.0006286 | .                        |
| rs1330541    | 13 | 110373991 | 0.0007516 | 0.07229  | 0.0006709 | .                        |
| rs2762342    | 6  | 35062347  | 0.0007522 | 0.0737   | 0.0005456 | ANKS1A(+3.157kb)         |
| rs2784086    | 9  | 139790858 | 0.0007522 | -0.08739 | 0.0009828 | TRAF2(0)                 |
| rs9973932    | 2  | 208250522 | 0.0007523 | -0.08808 | 0.0002569 | .                        |
| rs10825592   | 10 | 57498432  | 0.0007549 | 0.07249  | 0.0006141 | .                        |
| 2:142789252  | 2  | 142789252 | 0.0007552 | 0.1696   | 0.0005393 | LRP1B(0)                 |
| rs7767184    | 6  | 114334509 | 0.0007563 | 0.07073  | 0.0007856 | .                        |
| rs7893734    | 10 | 110518652 | 0.0007567 | 0.07927  | 0.0007249 | .                        |
| rs13029711   | 2  | 221209365 | 0.0007576 | -0.07257 | 0.0007854 | .                        |

|             |    |           |           |          |           |                                  |
|-------------|----|-----------|-----------|----------|-----------|----------------------------------|
| rs10276226  | 7  | 12602211  | 0.0007578 | 0.07013  | 0.0006654 | SCIN(-7.991kb)                   |
| rs35462494  | 21 | 27102767  | 0.0007579 | -0.09453 | 0.0009328 | JAM2(+15.53kb) GABPA(-4.561kb) A |
| rs1331374   | 9  | 12486143  | 0.0007579 | 0.1089   | 0.000914  | .                                |
| rs16919829  | 9  | 568846    | 0.000758  | 0.08536  | 0.0009207 | KANK1(0)                         |
| rs4805577   | 19 | 31038220  | 0.0007583 | -0.08133 | 0.000288  | ZNF536(0)                        |
| 7:101693610 | 7  | 101693610 | 0.0007584 | 0.1034   | 0.0007435 | CUX1(0)                          |
| 5:41589471  | 5  | 41589471  | 0.0007591 | -0.2443  | 0.000756  | .                                |
| 5:41589810  | 5  | 41589810  | 0.0007591 | -0.2443  | 0.000756  | .                                |
| 5:41590370  | 5  | 41590370  | 0.0007591 | -0.2443  | 0.000756  | .                                |
| 5:41592748  | 5  | 41592748  | 0.0007591 | -0.2443  | 0.000756  | .                                |
| 5:41598309  | 5  | 41598309  | 0.0007591 | -0.2443  | 0.000756  | .                                |
| 5:41598955  | 5  | 41598955  | 0.0007591 | -0.2443  | 0.000756  | .                                |
| rs58719114  | 2  | 217818176 | 0.0007594 | 0.1611   | 0.0009519 | .                                |
| rs35964795  | 2  | 217818431 | 0.0007594 | 0.1611   | 0.0009519 | .                                |
| rs13390478  | 2  | 217818653 | 0.0007594 | 0.1611   | 0.0009519 | .                                |
| rs13415775  | 2  | 217818737 | 0.0007594 | 0.1611   | 0.0009519 | .                                |
| rs13403963  | 2  | 217818815 | 0.0007594 | 0.1611   | 0.0009519 | .                                |
| rs35560193  | 2  | 217819375 | 0.0007594 | 0.1611   | 0.0009519 | .                                |
| rs12158323  | 22 | 44944013  | 0.0007594 | -0.07489 | 0.0007673 | .                                |
| rs6054266   | 20 | 6431457   | 0.0007596 | -0.07077 | 0.0003538 | .                                |
| rs6054267   | 20 | 6431569   | 0.0007596 | -0.07077 | 0.0003538 | .                                |
| rs6054269   | 20 | 6432075   | 0.0007596 | -0.07077 | 0.0003538 | .                                |
| rs6054271   | 20 | 6432432   | 0.0007596 | -0.07077 | 0.0003538 | .                                |
| rs10775627  | 20 | 6432447   | 0.0007596 | -0.07077 | 0.0003538 | .                                |
| rs2876033   | 20 | 6432735   | 0.0007596 | -0.07077 | 0.0003538 | .                                |
| rs2326785   | 20 | 6432797   | 0.0007596 | -0.07077 | 0.0003538 | .                                |
| rs55659044  | 11 | 133480832 | 0.0007598 | -0.08393 | 0.0005084 | .                                |
| rs6038504   | 20 | 6433489   | 0.0007608 | -0.07078 | 0.0003532 | .                                |
| rs6038507   | 20 | 6434050   | 0.0007608 | -0.07078 | 0.0003532 | .                                |
| rs6054275   | 20 | 6434117   | 0.0007608 | -0.07078 | 0.0003532 | .                                |
| rs55724323  | 7  | 49641643  | 0.0007608 | -0.08109 | 0.0009274 | .                                |
| rs2310952   | 4  | 131324624 | 0.0007611 | -0.07464 | 0.0008918 | .                                |
| rs6050710   | 20 | 25596312  | 0.0007613 | -0.2614  | 0.000667  | NANP(0)                          |
| rs6054265   | 20 | 6431393   | 0.0007614 | -0.07077 | 0.0003542 | .                                |
| rs9649728   | 7  | 49640912  | 0.0007615 | -0.08153 | 0.0008726 | .                                |
| rs603453    | 6  | 50082050  | 0.0007617 | 0.09491  | 0.0007594 | .                                |
| rs856103    | 1  | 158893122 | 0.0007621 | -0.08206 | 0.0007776 | PYHIN1(-8.219kb)                 |
| rs1975300   | 18 | 48102753  | 0.0007634 | -0.07149 | 0.0008897 | MAPK4(0)                         |
| rs1560523   | 5  | 34993836  | 0.0007651 | 0.07965  | 0.0005339 | AGXT2(-4.369kb)                  |
| 5:34878022  | 5  | 34878022  | 0.0007661 | 0.1419   | 0.000423  | TTC23L(0)                        |
| 5:34879392  | 5  | 34879392  | 0.0007661 | 0.1419   | 0.000423  | TTC23L(0)                        |
| rs10015407  | 4  | 131384420 | 0.0007666 | -0.0785  | 0.0007896 | .                                |
| rs856105    | 1  | 158894679 | 0.0007668 | -0.08197 | 0.0007974 | PYHIN1(-6.662kb)                 |
| 22:28047876 | 22 | 28047876  | 0.000767  | -0.09754 | 0.0007388 | .                                |
| rs6995911   | 8  | 71654084  | 0.0007684 | 0.133    | 0.0006192 | XKR9(+5.907kb)                   |
| rs7217923   | 17 | 56895175  | 0.0007694 | -0.1733  | 0.0008961 | PPM1E(0)                         |
| rs9840200   | 3  | 10654426  | 0.0007702 | -0.1249  | 0.0007612 | .                                |

|             |    |           |           |          |           |                  |
|-------------|----|-----------|-----------|----------|-----------|------------------|
| rs9459750   | 6  | 167197231 | 0.0007704 | -0.09953 | 0.0008745 | RPS6KA2(0)       |
| rs4747083   | 10 | 72467255  | 0.0007707 | -0.1314  | 0.0005305 | ADAMTS14(0)      |
| rs1407658   | 6  | 164074842 | 0.0007709 | -0.1659  | 0.0005634 | .                |
| rs9459747   | 6  | 167193166 | 0.0007713 | -0.09961 | 0.0008808 | RPS6KA2(0)       |
| rs6905053   | 6  | 167193326 | 0.0007713 | -0.09961 | 0.0008808 | RPS6KA2(0)       |
| rs6456124   | 6  | 167193831 | 0.0007713 | -0.09961 | 0.0008808 | RPS6KA2(0)       |
| rs6456125   | 6  | 167194018 | 0.0007713 | -0.09961 | 0.0008808 | RPS6KA2(0)       |
| rs7748360   | 6  | 167194070 | 0.0007713 | -0.09961 | 0.0008808 | RPS6KA2(0)       |
| rs9459748   | 6  | 167194505 | 0.0007713 | -0.09961 | 0.0008808 | RPS6KA2(0)       |
| rs9459749   | 6  | 167194610 | 0.0007713 | -0.09961 | 0.0008808 | RPS6KA2(0)       |
| rs7749522   | 6  | 167195006 | 0.0007713 | -0.09961 | 0.0008808 | RPS6KA2(0)       |
| rs56294034  | 11 | 22993486  | 0.0007714 | -0.08885 | 0.0008291 | .                |
| rs2114467   | 11 | 22995820  | 0.0007714 | -0.08885 | 0.0008291 | .                |
| rs1346251   | 11 | 22996282  | 0.0007714 | -0.08885 | 0.0008291 | .                |
| rs34854785  | 11 | 16485698  | 0.0007721 | 0.09444  | 0.0004694 | SOX6(0)          |
| 2:135516504 | 2  | 135516504 | 0.0007723 | -0.09921 | 0.0008962 | .                |
| rs684402    | 18 | 32640284  | 0.0007724 | 0.1272   | 0.0004655 | MAPRE2(0)        |
| rs2675255   | 3  | 8172650   | 0.0007733 | -0.1182  | 0.0007708 | .                |
| 2:19236941  | 2  | 19236941  | 0.000774  | -0.1116  | 0.0006231 | .                |
| 5:31147544  | 5  | 31147544  | 0.0007744 | 0.2387   | 0.0009465 | .                |
| 5:31147612  | 5  | 31147612  | 0.0007744 | 0.2387   | 0.0009465 | .                |
| rs59375809  | 1  | 230423790 | 0.000775  | -0.08345 | 0.0005269 | GALNT2(+5.844kb) |
| rs568179    | 5  | 39929770  | 0.0007754 | -0.06909 | 0.0005652 | .                |
| rs315701    | 9  | 114568897 | 0.0007755 | -0.06999 | 0.0009209 | .                |
| rs731901    | 14 | 54351897  | 0.0007761 | -0.1042  | 0.000672  | .                |
| rs2872005   | 3  | 78663656  | 0.0007771 | -0.07156 | 0.0006659 | ROBO1(0)         |
| rs12413912  | 10 | 134711659 | 0.0007772 | 0.07482  | 0.0009804 | .                |
| rs11684690  | 2  | 208230091 | 0.0007773 | -0.0863  | 0.0003214 | .                |
| 2:208230482 | 2  | 208230482 | 0.0007773 | -0.0863  | 0.0003214 | .                |
| rs7935260   | 11 | 74293539  | 0.0007776 | -0.09173 | 0.0007637 | POLD3(-10.09kb)  |
| rs7160860   | 14 | 54339493  | 0.000778  | -0.1033  | 0.0005539 | .                |
| rs856113    | 1  | 158898593 | 0.0007785 | -0.08378 | 0.0006976 | PYHIN1(-2.748kb) |
| 2:135528787 | 2  | 135528787 | 0.00078   | -0.1023  | 0.000965  | .                |
| rs856116    | 1  | 158899588 | 0.0007802 | -0.08341 | 0.0007314 | PYHIN1(-1.753kb) |
| rs856117    | 1  | 158899600 | 0.0007802 | -0.08341 | 0.0007314 | PYHIN1(-1.741kb) |
| rs2882110   | 22 | 44940501  | 0.0007802 | 0.09054  | 0.0008647 | .                |
| 5:31141636  | 5  | 31141636  | 0.0007802 | 0.2384   | 0.0009563 | .                |
| rs7963541   | 12 | 83908827  | 0.0007807 | 0.1695   | 0.0006127 | .                |
| rs6539758   | 12 | 83912337  | 0.0007807 | 0.1695   | 0.0006127 | .                |
| rs2901512   | 1  | 171135391 | 0.0007813 | 0.0739   | 0.0005555 | FMO2(-19kb)      |
| 5:164322416 | 5  | 164322416 | 0.0007818 | 0.2546   | 0.000462  | .                |
| 2:40157891  | 2  | 40157891  | 0.0007821 | -0.117   | 0.0009268 | .                |
| 9:86004024  | 9  | 86004024  | 0.0007821 | -0.1215  | 0.000587  | FRMD3(0)         |
| rs59192960  | 5  | 31181789  | 0.0007827 | 0.1829   | 0.0006988 | CDH6(-12.01kb)   |
| rs2852703   | 1  | 158834189 | 0.0007836 | -0.08104 | 0.0007739 | MNDA(+14.92kb)   |
| rs2852704   | 1  | 158834379 | 0.0007836 | -0.08104 | 0.0007739 | MNDA(+15.11kb)   |
| rs1985329   | 2  | 103058208 | 0.0007839 | -0.07112 | 0.0005849 | IL18RAP(0)       |

|             |    |           |           |          |           |                                   |
|-------------|----|-----------|-----------|----------|-----------|-----------------------------------|
| rs7691347   | 4  | 66138505  | 0.0007843 | 0.1472   | 0.0004897 | .                                 |
| 1:175666079 | 1  | 175666079 | 0.0007845 | -0.1562  | 0.0009466 | TNR(0)                            |
| rs11850821  | 14 | 105175085 | 0.0007854 | -0.122   | 0.0004681 | INF2(0) C14orf151(+3.94kb) ADSSL  |
| rs9307627   | 4  | 131386829 | 0.0007856 | -0.07804 | 0.0009068 | .                                 |
| rs11676081  | 2  | 208242483 | 0.0007857 | -0.08748 | 0.0002839 | .                                 |
| rs11695858  | 2  | 208229699 | 0.0007864 | -0.08628 | 0.000323  | .                                 |
| rs6914872   | 6  | 85368773  | 0.0007869 | 0.1987   | 0.0008554 | .                                 |
| rs5992593   | 22 | 17430931  | 0.0007879 | -0.08485 | 0.0005078 | GAB4(-11.89kb)                    |
| rs28452235  | 4  | 170901540 | 0.0007883 | 0.07345  | 0.0009046 | MFAP3L(-6.207kb)                  |
| rs9561951   | 13 | 96427491  | 0.0007893 | -0.08856 | 0.0007248 | DNAJC3(0)                         |
| rs17010929  | 12 | 83915258  | 0.0007899 | 0.1694   | 0.0006168 | .                                 |
| rs1387940   | 12 | 83916191  | 0.0007899 | 0.1694   | 0.0006168 | .                                 |
| rs10862687  | 12 | 83920737  | 0.0007899 | 0.1694   | 0.0006168 | .                                 |
| 6:50086382  | 6  | 50086382  | 0.0007903 | 0.09535  | 0.0007401 | .                                 |
| rs62124496  | 2  | 13050761  | 0.0007908 | -0.1449  | 0.0008303 | .                                 |
| rs11060117  | 12 | 129556120 | 0.0007914 | -0.09287 | 0.0006964 | TMEM132D(-0.15kb)                 |
| 5:34879925  | 5  | 34879925  | 0.000792  | 0.1416   | 0.0004383 | TTC23L(0)                         |
| 5:34881802  | 5  | 34881802  | 0.000792  | 0.1416   | 0.0004383 | TTC23L(0)                         |
| 5:34882221  | 5  | 34882221  | 0.000792  | 0.1416   | 0.0004383 | TTC23L(0)                         |
| rs624561    | 11 | 66414915  | 0.0007938 | 0.07852  | 0.0009289 | RBM4B(-17.55kb) RBM4(+0.975kb)    |
| rs4449203   | 20 | 11333782  | 0.0007944 | -0.07966 | 0.0006112 | .                                 |
| 5:41593195  | 5  | 41593195  | 0.0007946 | -0.2433  | 0.0007967 | .                                 |
| rs966937    | 5  | 40078418  | 0.0007964 | -0.09854 | 0.000871  | .                                 |
| 11:23000775 | 11 | 23000775  | 0.0007965 | -0.08869 | 0.0008488 | .                                 |
| rs977593    | 11 | 23001379  | 0.0007965 | -0.08869 | 0.0008488 | .                                 |
| rs4280749   | 4  | 131471878 | 0.0007972 | -0.08042 | 0.0007742 | .                                 |
| rs6821251   | 4  | 131472503 | 0.0007972 | -0.08042 | 0.0007742 | .                                 |
| rs6577117   | 13 | 113501593 | 0.0007974 | 0.07425  | 0.0006729 | ATP11A(0)                         |
| rs11677847  | 2  | 208230855 | 0.0007983 | -0.08643 | 0.0003046 | .                                 |
| rs1040084   | 4  | 54410224  | 0.0007985 | -0.08418 | 0.0006967 | LNX1(0)                           |
| rs4677173   | 3  | 72548351  | 0.0007988 | 0.06984  | 0.0006512 | .                                 |
| rs2322482   | 3  | 72548642  | 0.0007988 | 0.06984  | 0.0006512 | .                                 |
| rs9373956   | 6  | 107929025 | 0.0007997 | 0.07917  | 0.0008021 | SOBP(0)                           |
| rs9807962   | 2  | 102971664 | 0.0007999 | -0.07336 | 0.0008131 | IL1RL1(+3.167kb) IL18R1(-7.432kb) |
| rs12571354  | 10 | 9669681   | 0.0008003 | 0.06992  | 0.0007697 | .                                 |
| rs16903005  | 5  | 14005874  | 0.0008012 | -0.073   | 0.0005848 | .                                 |
| rs28832012  | 4  | 131303359 | 0.0008028 | 0.07629  | 0.0009949 | .                                 |
| rs55754990  | 11 | 23001995  | 0.000804  | -0.08866 | 0.0008473 | .                                 |
| rs55749111  | 11 | 23002487  | 0.000804  | -0.08866 | 0.0008473 | .                                 |
| rs6892328   | 5  | 41615809  | 0.0008041 | -0.1981  | 0.0008876 | .                                 |
| rs10016270  | 4  | 190297183 | 0.0008047 | 0.1188   | 0.0004584 | .                                 |
| rs4480395   | 1  | 171218955 | 0.0008055 | 0.07299  | 0.0005818 | FMO1(0)                           |
| rs10751326  | 10 | 44135449  | 0.0008057 | 0.07997  | 0.000994  | ZNF32(-3.857kb)                   |
| rs11773016  | 7  | 55926517  | 0.000806  | -0.0953  | 0.000782  | sep/14(0)                         |
| rs6099331   | 20 | 55471383  | 0.0008067 | -0.1082  | 0.0004865 | .                                 |
| rs17175708  | 8  | 38325131  | 0.0008075 | -0.07067 | 0.000604  | FGFR1(0)                          |
| rs4507377   | 4  | 131393684 | 0.0008077 | -0.07727 | 0.0008986 | .                                 |

|             |    |           |           |          |           |                                   |
|-------------|----|-----------|-----------|----------|-----------|-----------------------------------|
| rs61944138  | 12 | 129749163 | 0.0008082 | -0.2043  | 0.00097   | TMEM132D(0)                       |
| rs1580650   | 9  | 105523821 | 0.0008082 | -0.1014  | 0.0007443 | .                                 |
| 11:22998435 | 11 | 22998435  | 0.0008083 | -0.08854 | 0.0008692 | .                                 |
| rs855848    | 1  | 64353586  | 0.0008092 | 0.1473   | 0.0003792 | ROR1(0)                           |
| rs7098937   | 10 | 57442672  | 0.0008094 | 0.0717   | 0.0006393 | .                                 |
| rs35437546  | 4  | 66138743  | 0.0008103 | 0.1468   | 0.0005052 | .                                 |
| rs2818257   | 6  | 107926376 | 0.0008105 | 0.07828  | 0.0009359 | SOBP(0)                           |
| rs7904654   | 10 | 129210232 | 0.0008108 | 0.08037  | 0.000669  | .                                 |
| rs13429850  | 2  | 208250561 | 0.0008115 | -0.0826  | 0.0003067 | .                                 |
| rs9577170   | 13 | 113507781 | 0.0008116 | 0.07514  | 0.0006537 | ATP11A(0)                         |
| rs10043377  | 5  | 40090027  | 0.000813  | -0.09938 | 0.0008312 | .                                 |
| rs9348964   | 6  | 35107245  | 0.000814  | 0.07441  | 0.0005847 | TCP11(0)                          |
| rs7513724   | 1  | 67854535  | 0.0008143 | 0.3226   | 0.0008493 | SERBP1(-18.96kb) IL12RB2(0)       |
| rs4253982   | 10 | 57494881  | 0.0008152 | 0.07148  | 0.0007392 | .                                 |
| rs4297375   | 10 | 57495097  | 0.0008152 | 0.07148  | 0.0007392 | .                                 |
| rs7907029   | 10 | 57496291  | 0.0008152 | 0.07148  | 0.0007392 | .                                 |
| rs2642484   | 7  | 146389007 | 0.0008152 | -0.1041  | 0.0007057 | CNTNAP2(0)                        |
| rs11680443  | 2  | 208235631 | 0.0008157 | -0.08654 | 0.0002924 | .                                 |
| rs11685591  | 2  | 208235681 | 0.0008157 | -0.08654 | 0.0002924 | .                                 |
| rs2552272   | 8  | 6029741   | 0.0008161 | -0.1275  | 0.0008179 | .                                 |
| rs2762350   | 6  | 35084447  | 0.0008166 | 0.07334  | 0.000597  | TCP11(-1.401kb)                   |
| rs9644008   | 8  | 12683871  | 0.0008168 | -0.0885  | 0.0006519 | .                                 |
| rs634111    | 5  | 41580815  | 0.000817  | -0.1426  | 0.0006007 | .                                 |
| rs602511    | 5  | 41583279  | 0.000817  | -0.1426  | 0.0006007 | .                                 |
| rs11060114  | 12 | 129554373 | 0.0008177 | -0.09189 | 0.0007079 | TMEM132D(-1.897kb)                |
| rs3790270   | 20 | 19577156  | 0.0008181 | -0.0705  | 0.0008887 | SLC24A3(0)                        |
| rs856101    | 1  | 158891975 | 0.0008197 | -0.08188 | 0.0008176 | PYHIN1(-9.366kb)                  |
| rs1465249   | 17 | 12639294  | 0.0008198 | 0.06825  | 0.0007758 | MYOCD(0)                          |
| 8:128623931 | 8  | 128623931 | 0.0008209 | -0.1081  | 0.0009597 | .                                 |
| rs2694975   | 12 | 19957351  | 0.0008213 | -0.08126 | 0.0009999 | .                                 |
| rs7766940   | 6  | 167192611 | 0.0008213 | -0.1027  | 0.0009608 | RPS6KA2(0)                        |
| rs11132664  | 4  | 190414910 | 0.0008222 | 0.0762   | 0.0009828 | .                                 |
| rs4759313   | 12 | 54359074  | 0.0008231 | 0.07375  | 0.0008641 | HOXC13(+18.75kb) HOXC11(-7.835kb) |
| rs10783616  | 12 | 54359220  | 0.0008231 | 0.07375  | 0.0008641 | HOXC13(+18.89kb) HOXC11(-7.689kb) |
| rs2638395   | 12 | 19971152  | 0.0008234 | -0.08029 | 0.0008085 | .                                 |
| rs35708656  | 11 | 16524762  | 0.0008245 | 0.09818  | 0.0006323 | .                                 |
| rs10066303  | 5  | 13992639  | 0.0008258 | -0.07662 | 0.0008746 | .                                 |
| rs10079396  | 5  | 58616085  | 0.000826  | 0.1199   | 0.0005212 | PDE4D(0)                          |
| rs13392707  | 2  | 208255891 | 0.000828  | -0.08207 | 0.0003394 | .                                 |
| rs9956981   | 18 | 7950477   | 0.0008287 | 0.08702  | 0.0004023 | PTPRM(0)                          |
| rs10260305  | 7  | 79177860  | 0.0008287 | -0.1144  | 0.0008094 | .                                 |
| rs7783512   | 7  | 79178485  | 0.0008287 | -0.1144  | 0.0008094 | .                                 |
| rs7589803   | 2  | 129077103 | 0.0008294 | -0.1238  | 0.0005553 | HS6ST1(+0.932kb)                  |
| rs2970376   | 15 | 60236925  | 0.0008295 | -0.083   | 0.0007316 | .                                 |
| rs5765787   | 22 | 44942269  | 0.0008305 | -0.07428 | 0.0008807 | .                                 |
| rs10849118  | 12 | 4792492   | 0.0008312 | -0.08653 | 0.0009936 | NDUFA9(0)                         |
| rs16849813  | 3  | 139793887 | 0.0008315 | -0.1434  | 0.0005775 | CLSTN2(0)                         |

|             |    |           |           |          |           |                                |
|-------------|----|-----------|-----------|----------|-----------|--------------------------------|
| 8:71519906  | 8  | 71519906  | 0.0008317 | 0.1334   | 0.000772  | TRAM1(0)                       |
| rs10073221  | 5  | 14010231  | 0.000832  | -0.07249 | 0.0005827 | .                              |
| 18:66330425 | 18 | 66330425  | 0.0008324 | 0.1305   | 0.0002896 | TXNDC10(-10.5kb)               |
| rs61825963  | 1  | 218107692 | 0.0008331 | 0.1387   | 0.0003154 | .                              |
| rs484262    | 11 | 66399681  | 0.0008334 | 0.07826  | 0.0009685 | RBM4(-6.456kb) RBM14(+4.868kb) |
| 22:30616984 | 22 | 30616984  | 0.0008349 | -0.1858  | 0.0005288 | LIF(-19.46kb)                  |
| rs2552238   | 8  | 6031645   | 0.0008354 | -0.129   | 0.000821  | .                              |
| rs7708830   | 5  | 40102809  | 0.0008361 | -0.09893 | 0.0008126 | .                              |
| 1:182772544 | 1  | 182772544 | 0.0008367 | 0.1875   | 0.0009312 | NPL(0)                         |
| rs6085562   | 20 | 6430089   | 0.0008367 | -0.07043 | 0.0003864 | .                              |
| rs6575306   | 14 | 93565216  | 0.000837  | -0.09069 | 0.0009189 | ITPK1(0)                       |
| 2:19242899  | 2  | 19242899  | 0.0008377 | -0.1218  | 0.0004942 | .                              |
| 2:19243019  | 2  | 19243019  | 0.0008377 | -0.1218  | 0.0004942 | .                              |
| rs6798020   | 3  | 28169400  | 0.0008377 | -0.08072 | 0.0007919 | .                              |
| rs11761352  | 7  | 55950947  | 0.0008381 | -0.09349 | 0.0008205 | .                              |
| 7:135492521 | 7  | 135492521 | 0.0008382 | -0.195   | 0.0007816 | .                              |
| rs4578552   | 14 | 54352037  | 0.0008383 | -0.1035  | 0.0007287 | .                              |
| rs13391493  | 2  | 208258792 | 0.0008388 | -0.08187 | 0.0003415 | .                              |
| rs678996    | 5  | 41597071  | 0.0008389 | -0.161   | 0.0008236 | .                              |
| rs56084230  | 2  | 208231985 | 0.0008393 | -0.08603 | 0.0003276 | .                              |
| rs56106733  | 2  | 208232059 | 0.0008393 | -0.08603 | 0.0003276 | .                              |
| rs4473453   | 20 | 11334024  | 0.0008396 | -0.0796  | 0.0006864 | .                              |
| rs62569566  | 9  | 110412089 | 0.0008396 | -0.0993  | 0.0005602 | .                              |
| rs10033861  | 4  | 170821561 | 0.0008401 | -0.06968 | 0.0007977 | .                              |
| rs11737627  | 4  | 170822150 | 0.0008401 | -0.06968 | 0.0007977 | .                              |
| rs680199    | 13 | 37258797  | 0.0008402 | 0.07138  | 0.0007939 | C13orf36(0)                    |
| rs7110985   | 11 | 35343192  | 0.0008408 | 0.07299  | 0.000836  | SLC1A2(0)                      |
| rs17528473  | 5  | 58559042  | 0.000841  | 0.1063   | 0.0006027 | PDE4D(0)                       |
| rs624789    | 18 | 32626646  | 0.0008411 | 0.13     | 0.0003933 | MAPRE2(0)                      |
| rs17686482  | 8  | 71522264  | 0.0008422 | 0.1311   | 0.00071   | TRAM1(+1.66kb)                 |
| 11:22987447 | 11 | 22987447  | 0.0008448 | -0.08904 | 0.000944  | .                              |
| rs6038509   | 20 | 6434843   | 0.0008453 | -0.07023 | 0.0003963 | .                              |
| rs6117264   | 20 | 6435616   | 0.0008453 | -0.07023 | 0.0003963 | .                              |
| rs2210124   | 20 | 6435967   | 0.0008453 | -0.07023 | 0.0003963 | .                              |
| rs28361498  | 5  | 14008159  | 0.0008455 | -0.07259 | 0.0005663 | .                              |
| 5:92592055  | 5  | 92592055  | 0.0008459 | 0.2539   | 0.0008    | .                              |
| rs6133319   | 20 | 6431104   | 0.0008461 | -0.07021 | 0.0003974 | .                              |
| 8:71477742  | 8  | 71477742  | 0.0008465 | 0.1336   | 0.0006734 | TRAM1(-7.93kb)                 |
| rs11033073  | 11 | 35353944  | 0.0008481 | 0.0722   | 0.0008455 | SLC1A2(0)                      |
| rs17110428  | 12 | 72315010  | 0.0008484 | -0.1397  | 0.0009105 | TPH2(-17.61kb) TBC1D15(0)      |
| rs4354903   | 15 | 27339361  | 0.000849  | 0.07692  | 0.0009935 | .                              |
| rs9549568   | 13 | 113489819 | 0.0008492 | 0.07589  | 0.0008379 | ATP11A(0)                      |
| rs2675248   | 3  | 8166787   | 0.0008498 | -0.1202  | 0.0008696 | .                              |
| 2:208248801 | 2  | 208248801 | 0.0008505 | -0.0871  | 0.0002761 | .                              |
| 2:208248813 | 2  | 208248813 | 0.0008505 | -0.0871  | 0.0002761 | .                              |
| rs2462252   | 7  | 1316646   | 0.0008507 | -0.07405 | 0.0007248 | .                              |
| rs11061676  | 12 | 268036    | 0.0008508 | -0.2508  | 0.0006912 | IQSEC3(0)                      |



|             |    |           |           |          |           |                                  |
|-------------|----|-----------|-----------|----------|-----------|----------------------------------|
| rs9312397   | 4  | 190300582 | 0.0008508 | 0.1201   | 0.0004634 | .                                |
| rs12508280  | 4  | 131306476 | 0.000851  | -0.07711 | 0.0009519 | .                                |
| 4:170828457 | 4  | 170828457 | 0.0008519 | -0.2442  | 0.0007243 | .                                |
| rs28377374  | 7  | 31920025  | 0.0008522 | 0.2044   | 0.0009969 | PDE1C(0)                         |
| rs3745058   | 18 | 66368825  | 0.0008525 | 0.1318   | 0.000319  | TXNDC10(0) CCDC102B(-13.66kb)    |
| rs4941756   | 13 | 31702139  | 0.0008531 | 0.06775  | 0.0005576 | HSPH1(-8.623kb)                  |
| rs12056556  | 8  | 57183090  | 0.0008547 | -0.06949 | 0.0005396 | .                                |
| rs2690262   | 7  | 1316239   | 0.0008554 | -0.07282 | 0.0008542 | .                                |
| rs4463394   | 8  | 57186360  | 0.0008559 | -0.06943 | 0.0005449 | .                                |
| rs7012906   | 8  | 57186993  | 0.0008559 | -0.06943 | 0.0005449 | .                                |
| rs7461965   | 8  | 57189551  | 0.0008559 | -0.06943 | 0.0005449 | .                                |
| rs1824159   | 5  | 58618644  | 0.0008569 | 0.1194   | 0.0005268 | PDE4D(0)                         |
| 2:208273492 | 2  | 208273492 | 0.0008589 | -0.08167 | 0.0004118 | .                                |
| rs473818    | 11 | 84795484  | 0.0008606 | -0.08839 | 0.0009174 | .                                |
| rs9978441   | 21 | 45400234  | 0.0008607 | 0.09196  | 0.0008713 | AGPAT3(0)                        |
| 8:120869838 | 8  | 120869838 | 0.0008617 | 0.2929   | 0.0008184 | DSCC1(+1.689kb) DEPDC6(-16.06kb) |
| rs57613118  | 8  | 38328946  | 0.0008618 | -0.07086 | 0.0005952 | FGFR1(+2.594kb)                  |
| rs10847613  | 12 | 128906595 | 0.0008621 | 0.07287  | 0.0007949 | .                                |
| rs13089777  | 3  | 122879860 | 0.0008622 | -0.08553 | 0.0007479 | PDIA5(0)                         |
| rs10861950  | 12 | 108978949 | 0.0008633 | 0.0722   | 0.0008888 | TMEM119(-4.672kb) ISCU(+15.79kb) |
| 13:61795374 | 13 | 61795374  | 0.0008661 | 0.1581   | 0.0008593 | .                                |
| rs13426173  | 2  | 208251443 | 0.0008665 | -0.08212 | 0.0003385 | .                                |
| rs9973923   | 2  | 208251850 | 0.0008665 | -0.08212 | 0.0003385 | .                                |
| rs1896536   | 5  | 40108300  | 0.0008681 | -0.1015  | 0.0008785 | .                                |
| rs3087339   | 13 | 96410115  | 0.0008682 | -0.08793 | 0.0007473 | DNAJC3(0)                        |
| rs17769672  | 10 | 110521748 | 0.0008686 | 0.09105  | 0.0009901 | .                                |
| rs2388097   | 10 | 2566085   | 0.0008688 | 0.075    | 0.0006952 | .                                |
| rs1113431   | 13 | 113502788 | 0.0008697 | 0.07448  | 0.0006854 | ATP11A(0)                        |
| rs4730917   | 7  | 79173769  | 0.0008697 | -0.1138  | 0.000898  | .                                |
| rs1834852   | 5  | 40088545  | 0.0008707 | -0.1002  | 0.000841  | .                                |
| rs9521054   | 13 | 109439273 | 0.0008708 | 0.1104   | 0.0006551 | MYO16(0)                         |
| rs380297    | 5  | 14008071  | 0.0008711 | -0.07234 | 0.0005999 | .                                |
| rs413546    | 5  | 14009414  | 0.0008711 | -0.07234 | 0.0005999 | .                                |
| rs12744605  | 1  | 171145530 | 0.0008735 | 0.07214  | 0.0005998 | FMO2(-8.857kb)                   |
| rs4916410   | 1  | 171139541 | 0.0008741 | 0.07227  | 0.0005859 | FMO2(-14.85kb)                   |
| rs2215063   | 7  | 12614638  | 0.0008741 | 0.06914  | 0.0007048 | SCIN(0)                          |
| rs34044331  | 11 | 30264486  | 0.0008747 | -0.08156 | 0.0008947 | FSHB(+7.662kb)                   |
| rs34951229  | 11 | 30265166  | 0.0008747 | -0.08156 | 0.0008947 | FSHB(+8.342kb)                   |
| rs16921714  | 10 | 21595007  | 0.0008786 | 0.1703   | 0.0005861 | .                                |
| rs2872006   | 3  | 78663634  | 0.0008798 | -0.07084 | 0.0007695 | ROBO1(0)                         |
| rs7986841   | 13 | 26889728  | 0.0008801 | -0.3286  | 0.0007636 | CDK8(0)                          |
| rs2174461   | 7  | 55935290  | 0.0008805 | -0.0945  | 0.0008752 | sep/14(+4.808kb)                 |
| rs2959526   | 18 | 19204474  | 0.0008828 | -0.08736 | 0.0005511 | SNRPD1(0)                        |
| rs34760598  | 7  | 79176311  | 0.0008829 | -0.1155  | 0.0008293 | .                                |
| 5:1607640   | 5  | 1607640   | 0.0008835 | -0.09875 | 0.0007718 | .                                |
| rs11239108  | 10 | 45015510  | 0.0008837 | -0.1524  | 0.0007938 | .                                |
| 1:171197266 | 1  | 171197266 | 0.000884  | 0.2224   | 0.0008652 | FMO2(+15.44kb)                   |

|             |    |           |           |          |           |                 |
|-------------|----|-----------|-----------|----------|-----------|-----------------|
| rs980206    | 6  | 50116489  | 0.0008854 | 0.09356  | 0.0007714 | .               |
| rs705516    | 1  | 64365927  | 0.0008857 | 0.1515   | 0.0003863 | ROR1(0)         |
| rs9518768   | 13 | 103194007 | 0.0008864 | 0.0731   | 0.0004426 | .               |
| 8:71468392  | 8  | 71468392  | 0.0008885 | 0.1329   | 0.0007229 | TRAM1(-17.28kb) |
| rs4666378   | 2  | 19245044  | 0.0008889 | -0.1214  | 0.0005386 | .               |
| rs258880    | 5  | 16418880  | 0.0008892 | 0.08176  | 0.0006352 | .               |
| rs12134777  | 1  | 171138681 | 0.0008897 | 0.07199  | 0.0006174 | FMO2(-15.71kb)  |
| rs7891433   | 1  | 171139758 | 0.0008897 | 0.07199  | 0.0006174 | FMO2(-14.63kb)  |
| rs10912484  | 1  | 171140541 | 0.0008897 | 0.07199  | 0.0006174 | FMO2(-13.85kb)  |
| rs12132443  | 1  | 171142575 | 0.0008897 | 0.07199  | 0.0006174 | FMO2(-11.81kb)  |
| rs1919700   | 10 | 57411294  | 0.0008903 | -0.07142 | 0.0009516 | .               |
| rs2384675   | 10 | 57494790  | 0.0008904 | 0.0712   | 0.0007859 | .               |
| rs13144461  | 4  | 66136680  | 0.0008908 | 0.146    | 0.0005489 | .               |
| 2:208282465 | 2  | 208282465 | 0.0008917 | -0.08149 | 0.000424  | .               |
| rs7067853   | 10 | 57500910  | 0.0008918 | 0.07108  | 0.0007084 | .               |
| rs1911018   | 5  | 40088135  | 0.0008928 | -0.09883 | 0.0008672 | .               |
| rs1938211   | 6  | 48840687  | 0.0008931 | 0.3386   | 0.000951  | .               |
| rs9395416   | 6  | 48841545  | 0.0008933 | 0.3387   | 0.0009471 | .               |
| rs11710135  | 3  | 9398216   | 0.0008934 | -0.1193  | 0.000856  | THUMPD3(-6.5kb) |
| rs11940609  | 4  | 190298917 | 0.0008947 | 0.1184   | 0.0004841 | .               |
| rs951702    | 8  | 8123607   | 0.0008952 | 0.08661  | 0.0004843 | .               |
| rs11768243  | 7  | 872848    | 0.0008962 | -0.0699  | 0.0009987 | UNC84A(0)       |
| rs10978969  | 9  | 110418281 | 0.0008966 | -0.09765 | 0.0005394 | .               |
| rs4715105   | 6  | 48840215  | 0.0008974 | 0.3384   | 0.0009596 | .               |
| rs1930890   | 13 | 71040749  | 0.0008977 | 0.09231  | 0.0008821 | .               |
| rs6075539   | 20 | 19579029  | 0.0008986 | -0.07096 | 0.0008686 | SLC24A3(0)      |
| rs11742648  | 5  | 27476072  | 0.000904  | 0.07083  | 0.0009997 | .               |
| rs1469705   | 19 | 31038995  | 0.0009047 | -0.07938 | 0.0003979 | ZNF536(0)       |
| rs16839694  | 2  | 208233171 | 0.0009082 | -0.08539 | 0.0003745 | .               |
| rs3768570   | 1  | 171157875 | 0.0009105 | 0.07236  | 0.0005557 | FMO2(0)         |
| rs62124497  | 2  | 13059460  | 0.0009115 | -0.1436  | 0.0008846 | .               |
| rs4659495   | 1  | 237570457 | 0.0009127 | 0.0717   | 0.0007144 | RYR2(0)         |
| rs10740629  | 10 | 57499251  | 0.0009131 | 0.07104  | 0.0007585 | .               |
| rs6460967   | 7  | 12611252  | 0.0009137 | 0.06867  | 0.0007939 | SCIN(0)         |
| rs1580229   | 4  | 131476801 | 0.0009144 | -0.07997 | 0.0008623 | .               |
| rs2969151   | 4  | 131477149 | 0.0009144 | -0.07997 | 0.0008623 | .               |
| 4:66133615  | 4  | 66133615  | 0.0009147 | 0.1458   | 0.00058   | .               |
| 12:58385951 | 12 | 58385951  | 0.0009149 | -0.1692  | 0.0008008 | .               |
| rs10825588  | 10 | 57492353  | 0.000915  | 0.07098  | 0.0007887 | .               |
| rs11677814  | 2  | 208237960 | 0.0009168 | -0.0877  | 0.0003342 | .               |
| rs61765144  | 1  | 64418029  | 0.0009198 | 0.1496   | 0.0004148 | ROR1(0)         |
| rs10932191  | 2  | 208236250 | 0.0009203 | -0.08584 | 0.0003341 | .               |
| rs13400830  | 2  | 13054564  | 0.0009218 | -0.1427  | 0.0009819 | .               |
| rs9561208   | 13 | 93603787  | 0.000922  | -0.2424  | 0.000853  | .               |
| rs9561210   | 13 | 93604453  | 0.000922  | -0.2424  | 0.000853  | .               |
| rs11677973  | 2  | 208229097 | 0.0009231 | -0.08501 | 0.0003803 | .               |
| rs2926415   | 4  | 131446680 | 0.0009238 | 0.07288  | 0.0008423 | .               |

|             |    |           |           |          |           |                             |
|-------------|----|-----------|-----------|----------|-----------|-----------------------------|
| rs6954578   | 7  | 12604609  | 0.0009241 | 0.06862  | 0.0008734 | SCIN(-5.593kb)              |
| rs869218    | 18 | 46142862  | 0.0009248 | 0.08171  | 0.000693  | KIAA0427(0)                 |
| 11:23004474 | 11 | 23004474  | 0.0009251 | -0.08807 | 0.000868  | .                           |
| rs2244956   | 10 | 57414479  | 0.0009259 | -0.07129 | 0.0009719 | .                           |
| rs7834072   | 8  | 71898305  | 0.0009278 | 0.1263   | 0.0007097 | .                           |
| rs856108    | 1  | 158896122 | 0.0009279 | -0.08226 | 0.0008577 | PYHIN1(-5.219kb)            |
| rs6545600   | 2  | 57069147  | 0.0009289 | 0.0692   | 0.0009284 | .                           |
| rs6117265   | 20 | 6436817   | 0.000929  | -0.071   | 0.0003775 | .                           |
| rs6107806   | 20 | 6436838   | 0.000929  | -0.071   | 0.0003775 | .                           |
| rs62438720  | 6  | 167186112 | 0.0009328 | -0.08033 | 0.0009107 | RPS6KA2(0)                  |
| rs11115902  | 12 | 83926144  | 0.0009329 | 0.2833   | 0.0009556 | .                           |
| 2:173189621 | 2  | 173189621 | 0.0009331 | -0.1645  | 0.0005375 | .                           |
| rs55695281  | 16 | 87039215  | 0.0009349 | 0.1707   | 0.0004692 | .                           |
| rs9370129   | 6  | 13460321  | 0.0009352 | -0.09742 | 0.0006385 | GFOD1(0) C6orf114(-9.187kb) |
| rs1916519   | 10 | 57492823  | 0.0009353 | 0.07083  | 0.0008098 | .                           |
| rs7895765   | 10 | 129210876 | 0.0009365 | 0.08204  | 0.0008626 | .                           |
| rs6038510   | 20 | 6435029   | 0.000939  | -0.06967 | 0.0004445 | .                           |
| 3:131821550 | 3  | 131821550 | 0.0009404 | 0.3166   | 0.0008074 | .                           |
| rs953420    | 20 | 6416132   | 0.0009417 | -0.07009 | 0.0004218 | .                           |
| rs17214871  | 5  | 14007298  | 0.0009449 | -0.07197 | 0.000641  | .                           |
| rs11115898  | 12 | 83919184  | 0.000945  | 0.283    | 0.0009622 | .                           |
| 20:55471048 | 20 | 55471048  | 0.0009464 | -0.1085  | 0.000533  | .                           |
| rs285335    | 1  | 64435614  | 0.0009465 | 0.1523   | 0.0004662 | ROR1(0)                     |
| rs2177367   | 10 | 57499807  | 0.0009466 | 0.07085  | 0.0007825 | .                           |
| rs62506896  | 8  | 71843020  | 0.0009483 | 0.1405   | 0.0007592 | .                           |
| rs10978996  | 9  | 110438441 | 0.0009484 | -0.07313 | 0.0009922 | .                           |
| rs11679664  | 2  | 208262400 | 0.0009497 | -0.08058 | 0.0004249 | .                           |
| rs11682446  | 2  | 208263699 | 0.0009497 | -0.08058 | 0.0004249 | .                           |
| rs17203403  | 2  | 208263990 | 0.0009497 | -0.08058 | 0.0004249 | .                           |
| rs56221145  | 7  | 142541278 | 0.0009497 | -0.1084  | 0.0009195 | EPHB6(-11.51kb)             |
| rs12877721  | 13 | 113498981 | 0.00095   | 0.07392  | 0.0007556 | ATP11A(0)                   |
| rs9550226   | 13 | 113499188 | 0.00095   | 0.07392  | 0.0007556 | ATP11A(0)                   |
| rs7997897   | 13 | 113501209 | 0.0009515 | 0.07394  | 0.0007575 | ATP11A(0)                   |
| rs9577858   | 13 | 113501620 | 0.0009515 | 0.07394  | 0.0007575 | ATP11A(0)                   |
| rs7337058   | 13 | 113502583 | 0.0009515 | 0.07394  | 0.0007575 | ATP11A(0)                   |
| rs7860896   | 9  | 120483103 | 0.0009516 | -0.1245  | 0.000541  | TLR4(+3.337kb)              |
| rs17724250  | 5  | 58618234  | 0.0009527 | 0.1183   | 0.0005891 | PDE4D(0)                    |
| 2:208243995 | 2  | 208243995 | 0.0009531 | -0.08628 | 0.0003432 | .                           |
| rs487619    | 18 | 32628519  | 0.0009564 | 0.1277   | 0.0005059 | MAPRE2(0)                   |
| 18:32628645 | 18 | 32628645  | 0.0009564 | 0.1277   | 0.0005059 | MAPRE2(0)                   |
| rs444601    | 5  | 14007930  | 0.0009567 | -0.07186 | 0.0006393 | .                           |
| rs820074    | 6  | 35034754  | 0.0009604 | 0.07046  | 0.0007423 | ANKS1A(0)                   |
| rs153422    | 5  | 153729217 | 0.0009625 | 0.08115  | 0.0006722 | GALNT10(0)                  |
| rs2820148   | 1  | 158853733 | 0.0009641 | -0.0796  | 0.0008723 | .                           |
| rs11586149  | 1  | 240929035 | 0.0009652 | 0.08559  | 0.00091   | RGS7(-9.781kb)              |
| rs2820179   | 1  | 158839681 | 0.0009682 | -0.07952 | 0.0009059 | .                           |
| rs4703488   | 5  | 34991809  | 0.0009686 | 0.07772  | 0.000631  | AGXT2(-6.396kb)             |

|             |    |           |           |          |           |                         |
|-------------|----|-----------|-----------|----------|-----------|-------------------------|
| rs416168    | 13 | 113493638 | 0.0009689 | 0.07395  | 0.0008029 | ATP11A(0)               |
| rs2426703   | 20 | 55806656  | 0.0009691 | -0.08067 | 0.0008231 | BMP7(0)                 |
| rs6025452   | 20 | 55807236  | 0.0009691 | -0.08067 | 0.0008231 | BMP7(0)                 |
| rs6025453   | 20 | 55807251  | 0.0009691 | -0.08067 | 0.0008231 | BMP7(0)                 |
| rs7944547   | 11 | 30290763  | 0.0009706 | -0.08091 | 0.0009137 | .                       |
| rs8070631   | 17 | 43120500  | 0.0009706 | -0.08781 | 0.0004888 | NMT1(-18.18kb) DCAKD(0) |
| rs11695841  | 2  | 208252592 | 0.000976  | -0.08068 | 0.0003975 | .                       |
| rs17491039  | 12 | 58386712  | 0.0009783 | -0.1684  | 0.0008513 | .                       |
| rs978607    | 14 | 77685457  | 0.0009783 | 0.09613  | 0.0008131 | TMEM63C(0)              |
| rs820075    | 6  | 35034059  | 0.0009789 | 0.07031  | 0.000742  | ANKS1A(0)               |
| rs1380273   | 4  | 131472977 | 0.0009798 | -0.07918 | 0.0009441 | .                       |
| rs2852688   | 1  | 158876894 | 0.0009802 | -0.07941 | 0.0008834 | .                       |
| rs2494075   | 1  | 158876991 | 0.0009802 | -0.07941 | 0.0008834 | .                       |
| rs35163685  | 2  | 208247180 | 0.0009805 | -0.08592 | 0.0003314 | .                       |
| rs2793846   | 1  | 158889162 | 0.000985  | -0.07947 | 0.0008926 | PYHIN1(-12.18kb)        |
| rs856097    | 1  | 158890819 | 0.000985  | -0.07947 | 0.0008926 | PYHIN1(-10.52kb)        |
| rs12504129  | 4  | 170829608 | 0.000986  | -0.06871 | 0.0009758 | .                       |
| rs7690888   | 4  | 170830157 | 0.000986  | -0.06871 | 0.0009758 | .                       |
| rs7691042   | 4  | 170830214 | 0.000986  | -0.06871 | 0.0009758 | .                       |
| rs7801351   | 7  | 12619740  | 0.0009862 | 0.06914  | 0.0008275 | SCIN(0)                 |
| rs11082686  | 18 | 46142339  | 0.0009869 | 0.08147  | 0.0007764 | KIAA0427(0)             |
| rs10041419  | 5  | 14011208  | 0.000993  | -0.07191 | 0.0007191 | .                       |
| rs56699129  | 12 | 129551253 | 0.0009955 | -0.09154 | 0.0008467 | TMEM132D(-5.017kb)      |
| rs1494452   | 7  | 146396057 | 0.0009971 | -0.1037  | 0.0009918 | CNTNAP2(0)              |
| rs7335174   | 13 | 113496221 | 0.0009986 | 0.07431  | 0.000723  | ATP11A(0)               |
| rs2977877   | 8  | 136334953 | 0.0009988 | 0.09065  | 0.0007656 | .                       |
| rs12808748  | 11 | 16519510  | 0.000999  | 0.09224  | 0.0007743 | .                       |
| rs34221263  | 11 | 16526949  | 0.000999  | 0.09224  | 0.0007743 | .                       |
| rs34310036  | 11 | 16530408  | 0.000999  | 0.09224  | 0.0007743 | .                       |
| 14:64843719 | 14 | 64843719  | 0.0009999 | 0.2514   | 0.0007761 | MTHFD1(-11.37kb)        |
| rs55929521  | 14 | 64846304  | 0.0009999 | 0.2514   | 0.0007761 | MTHFD1(-8.788kb)        |
| 3:32812029  | 3  | 32812029  | 0.001     | 0.3282   | 0.0007698 | CNOT10(0)               |
| rs12537777  | 7  | 142536951 | 0.001     | -0.1072  | 0.0008746 | EPHB6(-15.84kb)         |

## PC2

| SNP        | CHR | BP       | p_plink   | beta_plink | p_emmax   | Annotation                |
|------------|-----|----------|-----------|------------|-----------|---------------------------|
| rs2252518  | 12  | 52381026 | 4.59E-07  | 0.07156    | 5.48E-07  | GRASP(-19.72kb) ACVR1B(0) |
| rs2252526  | 12  | 52381230 | 5.68E-07  | 0.07114    | 6.66E-07  | GRASP(-19.52kb) ACVR1B(0) |
| rs2453069  | 12  | 52383641 | 6.98E-07  | 0.06982    | 8.45E-07  | GRASP(-17.11kb) ACVR1B(0) |
| rs2854464  | 12  | 52388891 | 7.05E-07  | 0.0706     | 8.26E-07  | GRASP(-11.86kb) ACVR1B(0) |
| rs1494630  | 5   | 63394170 | 1.12E-06  | -0.1452    | 0.0000019 | .                         |
| rs10876222 | 12  | 52362479 | 1.36E-06  | 0.0704     | 1.39E-06  | ACVR1B(0)                 |
| rs62238885 | 22  | 32138138 | 0.0000015 | 0.1541     | 0.0000015 | DEPDC5(-11.93kb)          |
| rs62240516 | 22  | 32135582 | 0.0000015 | 0.1541     | 0.0000015 | DEPDC5(-14.49kb)          |
| rs62238886 | 22  | 32141311 | 1.64E-06  | 0.1554     | 1.65E-06  | DEPDC5(-8.757kb)          |
| rs34437092 | 12  | 52379238 | 2.07E-06  | 0.07148    | 2.49E-06  | ACVR1B(0)                 |
| rs10783486 | 12  | 52362786 | 2.36E-06  | 0.06873    | 2.49E-06  | ACVR1B(0)                 |

|            |    |           |           |          |           |                           |
|------------|----|-----------|-----------|----------|-----------|---------------------------|
| rs16989760 | 22 | 31951808  | 2.57E-06  | 0.1297   | 2.82E-06  | SFI1(0)                   |
| rs62237773 | 22 | 31965054  | 2.74E-06  | 0.1299   | 2.96E-06  | SFI1(0)                   |
| rs16989278 | 22 | 31957167  | 2.99E-06  | 0.1293   | 3.27E-06  | SFI1(0)                   |
| rs62237766 | 22 | 31957017  | 2.99E-06  | 0.1293   | 3.27E-06  | SFI1(0)                   |
| rs62237769 | 22 | 31959271  | 2.99E-06  | 0.1293   | 3.27E-06  | SFI1(0)                   |
| rs62237770 | 22 | 31961108  | 2.99E-06  | 0.1293   | 3.27E-06  | SFI1(0)                   |
| rs62237793 | 22 | 31975063  | 3.33E-06  | 0.1295   | 3.59E-06  | SFI1(0)                   |
| rs5753700  | 22 | 31971258  | 3.54E-06  | 0.1287   | 0.0000037 | SFI1(0)                   |
| rs1582156  | 1  | 195492345 | 3.76E-06  | -0.07163 | 3.83E-06  | .                         |
| rs60336366 | 8  | 114662251 | 3.76E-06  | 0.2742   | 3.97E-06  | .                         |
| rs7331194  | 13 | 106100393 | 0.0000039 | 0.05877  | 5.54E-06  | DAOA(-17.97kb)            |
| rs9351104  | 6  | 87347805  | 4.21E-06  | 0.05648  | 4.81E-06  | .                         |
| rs62237796 | 22 | 31976578  | 4.66E-06  | 0.1271   | 5.14E-06  | SFI1(0)                   |
| rs62237800 | 22 | 31982256  | 4.75E-06  | 0.1272   | 5.12E-06  | SFI1(0)                   |
| rs62237801 | 22 | 31982615  | 4.75E-06  | 0.1272   | 5.12E-06  | SFI1(0)                   |
| rs62237797 | 22 | 31976819  | 4.77E-06  | 0.127    | 5.23E-06  | SFI1(0)                   |
| rs62237798 | 22 | 31976839  | 4.77E-06  | 0.127    | 5.23E-06  | SFI1(0)                   |
| rs62237763 | 22 | 31947392  | 4.78E-06  | 0.1258   | 5.21E-06  | SFI1(0)                   |
| rs62237764 | 22 | 31947393  | 4.78E-06  | 0.1258   | 5.21E-06  | SFI1(0)                   |
| rs12723412 | 1  | 195472352 | 5.03E-06  | -0.07199 | 4.67E-06  | .                         |
| rs35728099 | 6  | 87343473  | 5.08E-06  | 0.05643  | 5.56E-06  | .                         |
| rs61561528 | 22 | 31983071  | 5.34E-06  | 0.1271   | 5.64E-06  | SFI1(0)                   |
| rs62237813 | 22 | 31991143  | 5.55E-06  | 0.1263   | 5.94E-06  | SFI1(0)                   |
| rs1341403  | 13 | 106116807 | 5.69E-06  | 0.05769  | 7.86E-06  | DAOA(-1.556kb)            |
| rs55728055 | 22 | 32093268  | 5.77E-06  | 0.1325   | 5.89E-06  | C22orf30(0)               |
| rs2641530  | 12 | 52384811  | 0.0000058 | 0.06299  | 7.86E-06  | GRASP(-15.94kb) ACVR1B(0) |
| rs4762039  | 12 | 52387337  | 5.82E-06  | 0.06748  | 7.07E-06  | GRASP(-13.41kb) ACVR1B(0) |
| rs16989274 | 22 | 31955908  | 5.85E-06  | 0.06696  | 6.35E-06  | SFI1(0)                   |
| rs4761841  | 12 | 52383227  | 5.85E-06  | 0.1274   | 0.0000071 | GRASP(-17.52kb) ACVR1B(0) |
| rs1126113  | 13 | 106101917 | 5.99E-06  | 0.0576   | 8.38E-06  | DAOA(-16.45kb)            |
| rs1126115  | 13 | 106102143 | 5.99E-06  | 0.0576   | 8.38E-06  | DAOA(-16.22kb)            |
| rs6491959  | 13 | 106102756 | 5.99E-06  | 0.0576   | 8.38E-06  | DAOA(-15.61kb)            |
| rs9558553  | 13 | 106101355 | 5.99E-06  | 0.0576   | 8.38E-06  | DAOA(-17.01kb)            |
| rs61680841 | 15 | 91816343  | 0.000006  | -0.09641 | 6.55E-06  | SV2B(0)                   |
| rs2480757  | 1  | 195512720 | 6.08E-06  | -0.06924 | 5.41E-06  | .                         |
| rs12742781 | 1  | 195471950 | 6.25E-06  | -0.07016 | 5.84E-06  | .                         |
| rs62237790 | 22 | 31972301  | 6.28E-06  | 0.1277   | 6.71E-06  | SFI1(0)                   |
| rs2400573  | 1  | 195473388 | 6.38E-06  | -0.06996 | 5.95E-06  | .                         |
| rs62026628 | 15 | 91817982  | 0.0000065 | -0.09599 | 7.21E-06  | SV2B(0)                   |
| rs17433688 | 6  | 87350040  | 6.61E-06  | 0.05528  | 7.09E-06  | .                         |
| rs2221652  | 6  | 87345500  | 6.66E-06  | 0.05527  | 7.11E-06  | .                         |
| rs6491960  | 13 | 106106233 | 0.0000067 | 0.0571   | 9.58E-06  | DAOA(-12.13kb)            |
| rs1935604  | 6  | 87352847  | 6.76E-06  | 0.1255   | 7.55E-06  | .                         |
| rs55734125 | 22 | 31994074  | 6.76E-06  | 0.05532  | 7.24E-06  | SFI1(0)                   |
| rs62240689 | 22 | 32113954  | 6.78E-06  | 0.1284   | 7.07E-06  | C22orf30(+5.223kb)        |
| rs62026609 | 15 | 91815768  | 6.81E-06  | -0.09592 | 7.29E-06  | SV2B(0)                   |
| rs1572764  | 1  | 195474792 | 7.05E-06  | -0.06974 | 6.44E-06  | .                         |

|            |    |           |           |          |           |                           |
|------------|----|-----------|-----------|----------|-----------|---------------------------|
| rs62236223 | 22 | 31863554  | 7.06E-06  | 0.1243   | 7.42E-06  | EIF4ENIF1(0)              |
| rs55684328 | 22 | 31995024  | 7.07E-06  | 0.1252   | 7.59E-06  | SFI1(0) PISD(-19.45kb)    |
| rs56355520 | 22 | 31995195  | 7.07E-06  | 0.1252   | 7.59E-06  | SFI1(0) PISD(-19.28kb)    |
| rs62237818 | 22 | 31995953  | 7.07E-06  | 0.1252   | 7.59E-06  | SFI1(0) PISD(-18.52kb)    |
| rs7285091  | 22 | 31996363  | 7.07E-06  | 0.1252   | 7.59E-06  | SFI1(0) PISD(-18.11kb)    |
| rs8142821  | 22 | 31941240  | 7.18E-06  | 0.1244   | 7.44E-06  | SFI1(0)                   |
| rs8139274  | 22 | 32003651  | 7.22E-06  | 0.1236   | 7.69E-06  | SFI1(0) PISD(-10.83kb)    |
| rs10737651 | 1  | 195465617 | 7.34E-06  | -0.0695  | 7.13E-06  | .                         |
| rs62240685 | 22 | 32101649  | 7.36E-06  | 0.1279   | 7.69E-06  | C22orf30(0)               |
| rs10921859 | 1  | 195473977 | 7.54E-06  | -0.06906 | 7.03E-06  | .                         |
| rs62237829 | 22 | 32002882  | 7.62E-06  | 0.1248   | 8.06E-06  | SFI1(0) PISD(-11.6kb)     |
| rs8139560  | 22 | 32003798  | 7.62E-06  | 0.1248   | 8.06E-06  | SFI1(0) PISD(-10.68kb)    |
| rs12704645 | 7  | 92622650  | 7.68E-06  | 0.05567  | 7.42E-06  | .                         |
| rs10801423 | 1  | 195464733 | 7.69E-06  | -0.06981 | 0.0000072 | .                         |
| rs62239183 | 22 | 32065988  | 0.0000077 | 0.1275   | 8.03E-06  | C22orf30(-6.253kb)        |
| rs62468398 | 7  | 131893485 | 7.73E-06  | -0.1634  | 0.0000129 | PLXNA4(0)                 |
| rs10801424 | 1  | 195467805 | 7.79E-06  | -0.06947 | 7.16E-06  | .                         |
| rs9680589  | 22 | 31853484  | 7.89E-06  | 0.1239   | 7.92E-06  | EIF4ENIF1(0)              |
| rs6660422  | 1  | 195461367 | 7.97E-06  | -0.06939 | 7.55E-06  | .                         |
| rs62544064 | 9  | 26469905  | 8.09E-06  | 0.1867   | 8.15E-06  | .                         |
| rs1416748  | 1  | 195473130 | 8.16E-06  | -0.06924 | 7.51E-06  | .                         |
| rs6668743  | 1  | 195456799 | 8.55E-06  | -0.06933 | 8.56E-06  | .                         |
| rs3934377  | 1  | 195457871 | 8.65E-06  | -0.06916 | 8.11E-06  | .                         |
| rs4329493  | 1  | 195460605 | 8.67E-06  | -0.06914 | 8.19E-06  | .                         |
| rs4503329  | 1  | 195460647 | 8.67E-06  | -0.06914 | 8.19E-06  | .                         |
| rs4657984  | 1  | 195460263 | 8.67E-06  | -0.06914 | 8.19E-06  | .                         |
| rs6697802  | 1  | 195461229 | 8.67E-06  | -0.06914 | 8.19E-06  | .                         |
| rs7535571  | 1  | 195460041 | 8.67E-06  | -0.06914 | 8.19E-06  | .                         |
| rs62237772 | 22 | 31964975  | 8.87E-06  | 0.1238   | 9.31E-06  | SFI1(0)                   |
| rs16989650 | 22 | 31858029  | 8.91E-06  | 0.1235   | 8.89E-06  | EIF4ENIF1(0)              |
| rs56385611 | 22 | 31859511  | 9.01E-06  | 0.1234   | 9.03E-06  | EIF4ENIF1(0)              |
| rs1538596  | 1  | 195459410 | 9.14E-06  | -0.06899 | 8.59E-06  | .                         |
| rs1572765  | 1  | 195476951 | 9.15E-06  | -0.06912 | 8.12E-06  | .                         |
| rs1003827  | 7  | 92616518  | 9.18E-06  | 0.05537  | 0.000009  | .                         |
| rs4581580  | 13 | 106103782 | 9.27E-06  | 0.06568  | 0.0000132 | DAOA(-14.58kb)            |
| rs4761842  | 12 | 52383229  | 9.27E-06  | 0.05636  | 0.0000114 | GRASP(-17.52kb) ACVR1B(0) |
| rs1890647  | 1  | 195534620 | 9.38E-06  | -0.06666 | 9.43E-06  | .                         |
| rs16989427 | 22 | 32108475  | 0.0000094 | 0.1269   | 9.78E-06  | C22orf30(0)               |
| rs62237832 | 22 | 32011857  | 9.64E-06  | 0.1223   | 0.0000105 | SFI1(0) PISD(-2.621kb)    |
| rs62237833 | 22 | 32012141  | 9.64E-06  | 0.1223   | 0.0000105 | SFI1(0) PISD(-2.337kb)    |
| rs16989312 | 22 | 31999846  | 0.0000102 | 0.1212   | 0.0000109 | SFI1(0) PISD(-14.63kb)    |
| rs55806621 | 22 | 31945327  | 0.0000102 | 0.1234   | 0.0000108 | SFI1(0)                   |
| rs12115450 | 9  | 26525312  | 0.0000103 | -0.06813 | 0.0000118 | .                         |
| rs1890644  | 1  | 195481919 | 0.0000103 | -0.06716 | 9.84E-06  | .                         |
| rs2790084  | 1  | 195562043 | 0.0000103 | 0.1666   | 8.87E-06  | .                         |
| rs7790945  | 7  | 92619941  | 0.0000104 | 0.05474  | 0.0000107 | .                         |
| rs10737652 | 1  | 195476077 | 0.0000106 | -0.06807 | 0.00001   | .                         |

|            |    |           |           |          |           |                                  |
|------------|----|-----------|-----------|----------|-----------|----------------------------------|
| rs10737653 | 1  | 195476206 | 0.0000106 | -0.06807 | 0.00001   | .                                |
| rs2773449  | 1  | 195525644 | 0.0000107 | -0.0671  | 0.00001   | .                                |
| rs28606423 | 3  | 112336825 | 0.0000107 | -0.07455 | 0.0000115 | CCDC80(0)                        |
| rs62544373 | 9  | 26511876  | 0.0000107 | 0.1664   | 0.0000121 | .                                |
| rs62544374 | 9  | 26515938  | 0.0000107 | 0.1665   | 0.000012  | .                                |
| rs11587732 | 1  | 102402745 | 0.0000108 | -0.1586  | 0.0000115 | OLFM3(0)                         |
| rs62544375 | 9  | 26519444  | 0.0000111 | 0.1662   | 0.0000125 | .                                |
| rs62544378 | 9  | 26522449  | 0.0000111 | 0.1662   | 0.0000125 | .                                |
| rs6475909  | 9  | 26518389  | 0.0000111 | 0.1662   | 0.0000125 | .                                |
| rs10801429 | 1  | 195494727 | 0.0000112 | -0.06789 | 0.0000108 | .                                |
| rs2242106  | 12 | 52369300  | 0.0000112 | 0.06566  | 0.000013  | ACVR1B(0)                        |
| rs62544065 | 9  | 26477796  | 0.0000112 | 0.1738   | 0.000012  | .                                |
| rs62544069 | 9  | 26480370  | 0.0000112 | 0.1738   | 0.000012  | .                                |
| rs2773442  | 1  | 195540124 | 0.0000113 | -0.06611 | 0.0000106 | .                                |
| rs62544072 | 9  | 26483447  | 0.0000113 | 0.1737   | 0.0000121 | .                                |
| rs7048432  | 9  | 26485894  | 0.0000113 | 0.1737   | 0.0000121 | .                                |
| rs7301802  | 12 | 52384353  | 0.0000114 | 0.06537  | 0.0000134 | GRASP(-16.39kb) ACVR1B(0)        |
| rs1361349  | 1  | 195485556 | 0.0000116 | -0.06772 | 0.0000111 | .                                |
| rs1582157  | 1  | 195492387 | 0.0000116 | -0.06772 | 0.0000111 | .                                |
| rs1856559  | 1  | 195479135 | 0.0000116 | -0.06772 | 0.0000111 | .                                |
| rs2773445  | 1  | 195527361 | 0.0000116 | -0.06772 | 0.0000109 | .                                |
| rs6428292  | 1  | 195479612 | 0.0000116 | -0.06602 | 0.0000111 | .                                |
| rs1576473  | 1  | 195518668 | 0.0000117 | -0.06693 | 0.0000107 | .                                |
| rs2773444  | 1  | 195556698 | 0.0000117 | -0.06667 | 9.71E-06  | .                                |
| rs2391191  | 13 | 106119446 | 0.0000118 | -0.06713 | 0.0000163 | DAOA(0)                          |
| rs2790078  | 1  | 195557182 | 0.0000118 | -0.06643 | 0.0000102 | .                                |
| rs7529680  | 1  | 195503853 | 0.0000118 | 0.05609  | 0.0000104 | .                                |
| rs1890646  | 1  | 195531594 | 0.0000119 | -0.06591 | 0.0000111 | .                                |
| rs2400603  | 1  | 195531079 | 0.0000119 | -0.06591 | 0.0000111 | .                                |
| rs2480756  | 1  | 195537767 | 0.000012  | -0.06583 | 0.0000118 | .                                |
| rs12133330 | 1  | 195494799 | 0.0000121 | -0.06763 | 0.0000114 | .                                |
| rs1339559  | 1  | 195493538 | 0.0000121 | -0.06763 | 0.0000114 | .                                |
| rs1339560  | 1  | 195493629 | 0.0000121 | -0.06763 | 0.0000114 | .                                |
| rs2486462  | 1  | 195522825 | 0.0000123 | -0.06674 | 0.0000113 | .                                |
| rs62236215 | 22 | 31834823  | 0.0000123 | 0.12     | 0.000013  | EIF4ENIF1(-0.531kb) DRG1(+4.651k |
| rs16989753 | 22 | 31946282  | 0.0000124 | 0.1197   | 0.0000129 | SFI1(0)                          |
| rs2211074  | 6  | 87349163  | 0.0000126 | 0.0536   | 0.0000132 | .                                |
| rs2773447  | 1  | 195524515 | 0.0000128 | -0.06635 | 0.0000119 | .                                |
| rs2773448  | 1  | 195524762 | 0.0000128 | -0.06635 | 0.0000119 | .                                |
| rs62237761 | 22 | 31931397  | 0.0000128 | -0.06635 | 0.0000135 | SFI1(0)                          |
| rs7515404  | 1  | 195503649 | 0.0000128 | 0.1212   | 0.0000119 | .                                |
| rs1018487  | 22 | 31992264  | 0.0000129 | 0.1333   | 0.0000132 | SFI1(0)                          |
| rs2263381  | 1  | 195537470 | 0.000013  | -0.06565 | 0.0000121 | .                                |
| rs11811151 | 1  | 195520795 | 0.0000131 | -0.06648 | 0.000013  | .                                |
| rs9621295  | 22 | 32007153  | 0.0000133 | 0.1207   | 0.0000145 | SFI1(0) PISD(-7.325kb)           |
| rs1416749  | 1  | 195514280 | 0.0000134 | -0.06616 | 0.0000125 | .                                |
| rs2480758  | 1  | 195510708 | 0.0000134 | -0.06616 | 0.0000125 | .                                |

|            |    |           |           |          |           |                                  |
|------------|----|-----------|-----------|----------|-----------|----------------------------------|
| rs7516487  | 1  | 195505679 | 0.0000134 | -0.06616 | 0.0000125 | .                                |
| rs3916966  | 13 | 106110895 | 0.0000135 | 0.05557  | 0.0000191 | DAOA(-7.468kb)                   |
| rs1935596  | 6  | 87368368  | 0.0000136 | -0.09647 | 0.0000158 | .                                |
| rs63178362 | 1  | 172376053 | 0.0000136 | 0.05378  | 0.0000137 | DNM3(0) C1orf105(-13.78kb)       |
| rs10090582 | 8  | 54440206  | 0.0000142 | 0.1236   | 0.0000104 | .                                |
| rs62236224 | 22 | 31866497  | 0.0000142 | -0.082   | 0.0000144 | EIF4ENIF1(0)                     |
| rs2486471  | 1  | 195555028 | 0.0000144 | -0.06582 | 0.0000125 | .                                |
| rs6657041  | 1  | 225573819 | 0.0000148 | 0.1942   | 0.0000151 | LBR(-15.38kb)                    |
| rs2359997  | 12 | 52391833  | 0.000015  | 0.06536  | 0.0000166 | GRASP(-8.914kb) ACVR1B(+0.973kb) |
| rs2790079  | 1  | 195559946 | 0.0000151 | -0.1569  | 0.0000133 | .                                |
| rs2790082  | 1  | 195560279 | 0.0000151 | -0.1569  | 0.0000133 | .                                |
| rs2790085  | 1  | 195562355 | 0.0000151 | -0.0656  | 0.0000133 | .                                |
| rs58294271 | 1  | 102398880 | 0.0000151 | -0.0656  | 0.0000158 | OLFM3(0)                         |
| rs61285779 | 1  | 102399210 | 0.0000151 | -0.0656  | 0.0000158 | OLFM3(0)                         |
| rs11585635 | 1  | 102405967 | 0.0000152 | -0.1559  | 0.0000161 | OLFM3(0)                         |
| rs17125793 | 1  | 102404461 | 0.0000152 | -0.1559  | 0.0000161 | OLFM3(0)                         |
| rs6677151  | 1  | 102407857 | 0.0000152 | -0.1559  | 0.0000161 | OLFM3(0)                         |
| rs7527275  | 1  | 195500182 | 0.0000154 | -0.066   | 0.0000141 | .                                |
| rs28495532 | 21 | 33653528  | 0.0000156 | 0.05968  | 0.000016  | MRAP(-10.6kb) C21orf45(+2.152kb) |
| rs16916769 | 8  | 95371789  | 0.0000158 | 0.1761   | 0.0000127 | RAD54B(-12.4kb)                  |
| rs7001164  | 8  | 95375692  | 0.0000158 | 0.1761   | 0.0000127 | RAD54B(-8.495kb)                 |
| rs62237849 | 22 | 32029807  | 0.0000164 | 0.1226   | 0.0000183 | SFI1(+15.27kb) PISD(+2.997kb)    |
| rs1590888  | 1  | 195541586 | 0.0000168 | -0.06473 | 0.0000163 | .                                |
| rs1590889  | 1  | 195541613 | 0.0000168 | -0.06473 | 0.0000163 | .                                |
| rs2773431  | 1  | 195543496 | 0.0000168 | -0.06473 | 0.0000163 | .                                |
| rs2773434  | 1  | 195542035 | 0.0000168 | -0.06473 | 0.0000163 | .                                |
| rs2790070  | 1  | 195544560 | 0.0000168 | -0.06473 | 0.0000163 | .                                |
| rs1590890  | 1  | 195541709 | 0.0000169 | -0.06609 | 0.0000165 | .                                |
| rs10119649 | 9  | 26556779  | 0.0000171 | 0.1642   | 0.0000201 | .                                |
| rs62544423 | 9  | 26554781  | 0.0000173 | 0.164    | 0.0000206 | .                                |
| rs2773426  | 1  | 195544917 | 0.0000174 | -0.06465 | 0.000017  | .                                |
| rs62236218 | 22 | 31845153  | 0.0000175 | 0.1184   | 0.0000183 | EIF4ENIF1(0) DRG1(+14.98kb)      |
| rs56112397 | 22 | 32032939  | 0.0000176 | 0.1222   | 0.0000193 | SFI1(+18.41kb) PISD(+6.129kb)    |
| rs4916255  | 1  | 172380875 | 0.0000177 | -0.09487 | 0.000019  | DNM3(0) C1orf105(-8.954kb)       |
| rs16989623 | 22 | 31840379  | 0.0000179 | 0.1182   | 0.0000189 | EIF4ENIF1(0) DRG1(+10.21kb)      |
| rs2400605  | 1  | 195540439 | 0.0000181 | -0.06452 | 0.0000175 | .                                |
| rs2480763  | 1  | 195564002 | 0.0000182 | -0.06497 | 0.0000162 | .                                |
| rs60523486 | 8  | 95461611  | 0.0000183 | 0.1707   | 0.0000163 | RAD54B(0)                        |
| rs61410835 | 8  | 95458651  | 0.0000183 | 0.1707   | 0.0000163 | RAD54B(0)                        |
| rs7829493  | 8  | 95461573  | 0.0000183 | 0.1707   | 0.0000163 | RAD54B(0)                        |
| rs2480760  | 1  | 195544806 | 0.0000184 | -0.06448 | 0.0000178 | .                                |
| rs2890804  | 8  | 95459993  | 0.0000184 | 0.053    | 0.0000162 | RAD54B(0)                        |
| rs62469724 | 7  | 131883743 | 0.0000184 | -0.1515  | 0.0000289 | PLXNA4(0)                        |
| rs9767633  | 6  | 87355348  | 0.0000184 | 0.1708   | 0.0000219 | .                                |
| rs10754142 | 1  | 195456563 | 0.0000186 | -0.06642 | 0.0000173 | .                                |
| rs16989635 | 22 | 31847912  | 0.0000186 | 0.1184   | 0.0000194 | EIF4ENIF1(0) DRG1(+17.74kb)      |
| rs62542133 | 9  | 26507800  | 0.0000186 | 0.164    | 0.0000204 | .                                |



|            |    |           |           |          |           |                               |
|------------|----|-----------|-----------|----------|-----------|-------------------------------|
| rs62542134 | 9  | 26508945  | 0.0000186 | 0.164    | 0.0000204 | .                             |
| rs62237809 | 22 | 31990500  | 0.0000188 | 0.1216   | 0.0000198 | SFI1(0)                       |
| rs2773432  | 1  | 195543251 | 0.0000191 | -0.06422 | 0.0000203 | .                             |
| rs16989638 | 22 | 31850607  | 0.0000193 | 0.1185   | 0.00002   | EIF4ENIF1(0)                  |
| rs56314242 | 22 | 31851594  | 0.0000193 | 0.1186   | 0.0000199 | EIF4ENIF1(0)                  |
| rs3916967  | 13 | 106117348 | 0.0000195 | 0.05439  | 0.000027  | DAOA(-1.015kb)                |
| rs62239181 | 22 | 32065080  | 0.0000196 | 0.1219   | 0.0000214 | C22orf30(-7.161kb)            |
| rs62468400 | 7  | 131897229 | 0.0000196 | -0.1561  | 0.0000313 | PLXNA4(0)                     |
| rs62026604 | 15 | 91812223  | 0.0000197 | -0.09309 | 0.0000215 | SV2B(0)                       |
| rs62468399 | 7  | 131894836 | 0.0000198 | -0.1559  | 0.0000323 | PLXNA4(0)                     |
| rs62544458 | 9  | 26562070  | 0.0000204 | 0.1636   | 0.000024  | .                             |
| rs62544457 | 9  | 26561866  | 0.0000209 | 0.1634   | 0.0000246 | .                             |
| rs62544459 | 9  | 26562077  | 0.0000209 | 0.1634   | 0.0000246 | .                             |
| rs62546660 | 9  | 26563229  | 0.0000209 | 0.1634   | 0.0000246 | .                             |
| rs62546661 | 9  | 26563271  | 0.0000209 | 0.1634   | 0.0000246 | .                             |
| rs7861196  | 9  | 26561661  | 0.0000209 | 0.1634   | 0.0000246 | .                             |
| rs10124563 | 9  | 26560415  | 0.000021  | 0.1634   | 0.0000245 | .                             |
| rs8142355  | 22 | 32081681  | 0.0000211 | 0.1203   | 0.0000211 | C22orf30(0)                   |
| rs17088143 | 4  | 58325905  | 0.0000215 | -0.06473 | 0.0000228 | .                             |
| rs61145075 | 9  | 26494064  | 0.0000216 | 0.167    | 0.0000232 | .                             |
| rs62544110 | 9  | 26491151  | 0.0000216 | 0.167    | 0.0000232 | .                             |
| rs7874959  | 9  | 26494720  | 0.0000216 | 0.167    | 0.0000232 | .                             |
| rs12194827 | 6  | 87368616  | 0.0000217 | 0.05255  | 0.0000244 | .                             |
| rs4735290  | 8  | 95398843  | 0.0000217 | 0.167    | 0.000018  | RAD54B(0)                     |
| rs12542622 | 8  | 95477555  | 0.0000219 | 0.1703   | 0.0000192 | RAD54B(0)                     |
| rs59233901 | 8  | 95476684  | 0.0000219 | 0.1703   | 0.0000192 | RAD54B(0)                     |
| rs60654408 | 8  | 95468637  | 0.0000219 | 0.1703   | 0.0000192 | RAD54B(0)                     |
| rs6991270  | 8  | 95472856  | 0.0000219 | 0.1703   | 0.0000192 | RAD54B(0)                     |
| rs7845278  | 8  | 95469843  | 0.0000219 | 0.1703   | 0.0000192 | RAD54B(0)                     |
| rs2214516  | 7  | 96053137  | 0.000022  | 0.2406   | 0.0000179 | .                             |
| rs62542130 | 9  | 26501246  | 0.0000224 | 0.1645   | 0.0000245 | .                             |
| rs7466810  | 9  | 26499954  | 0.0000224 | 0.1645   | 0.0000245 | .                             |
| rs7856635  | 9  | 26502634  | 0.0000224 | 0.1645   | 0.0000245 | .                             |
| rs7863975  | 9  | 26500675  | 0.0000224 | 0.1645   | 0.0000245 | .                             |
| rs8047770  | 16 | 13763411  | 0.0000232 | 0.07329  | 0.0000228 | .                             |
| rs1932850  | 1  | 102410515 | 0.0000238 | -0.1516  | 0.000026  | OLFM3(0)                      |
| rs6938584  | 6  | 87370190  | 0.0000241 | 0.0523   | 0.000027  | .                             |
| rs12429858 | 13 | 38486031  | 0.0000243 | -0.07765 | 0.000027  | .                             |
| rs978875   | 1  | 172374555 | 0.0000244 | -0.09347 | 0.0000246 | DNM3(0) C1orf105(-15.27kb)    |
| rs10953080 | 7  | 92610009  | 0.000025  | 0.05276  | 0.0000281 | .                             |
| rs1013803  | 7  | 92623141  | 0.0000252 | 0.05134  | 0.0000256 | .                             |
| rs12506913 | 4  | 139305156 | 0.0000254 | -0.05655 | 0.0000212 | .                             |
| rs2773453  | 1  | 195515159 | 0.0000256 | -0.06432 | 0.0000246 | .                             |
| rs2790064  | 1  | 195515157 | 0.0000256 | -0.06432 | 0.0000246 | .                             |
| rs55648708 | 22 | 32032062  | 0.0000258 | 0.1194   | 0.0000284 | SFI1(+17.53kb) PISD(+5.252kb) |
| rs62237852 | 22 | 32032442  | 0.0000258 | 0.1194   | 0.0000284 | SFI1(+17.91kb) PISD(+5.632kb) |
| rs62542131 | 9  | 26506084  | 0.0000266 | 0.1619   | 0.0000296 | .                             |

|            |    |           |           |          |           |                                   |
|------------|----|-----------|-----------|----------|-----------|-----------------------------------|
| rs62542132 | 9  | 26506170  | 0.0000266 | 0.1619   | 0.0000296 | .                                 |
| rs10088177 | 8  | 117756957 | 0.0000267 | 0.07885  | 0.0000259 | EIF3H(0)                          |
| rs6428290  | 1  | 195454955 | 0.0000269 | -0.06544 | 0.0000253 | .                                 |
| rs5998081  | 22 | 32070637  | 0.0000272 | 0.1131   | 0.0000292 | C22orf30(-1.604kb)                |
| rs2773428  | 1  | 195545892 | 0.0000278 | -0.06295 | 0.0000273 | .                                 |
| rs16989385 | 22 | 32064322  | 0.0000284 | 0.1196   | 0.0000309 | C22orf30(-7.919kb)                |
| rs62236171 | 22 | 31743999  | 0.0000284 | 0.1199   | 0.0000295 | PATZ1(+1.75kb)                    |
| rs6570531  | 6  | 143213872 | 0.0000284 | 0.1684   | 0.0000299 | HIVEP2(0)                         |
| rs155034   | 5  | 4356449   | 0.0000289 | -0.06892 | 0.000028  | .                                 |
| rs726427   | 1  | 184665593 | 0.0000293 | -0.05111 | 0.0000382 | EDEM3(0)                          |
| rs9425635  | 1  | 184663898 | 0.0000293 | -0.05112 | 0.0000382 | EDEM3(0)                          |
| rs10905434 | 10 | 8681924   | 0.0000294 | -0.06793 | 0.0000312 | .                                 |
| rs2773429  | 1  | 195547326 | 0.0000298 | -0.06274 | 0.0000292 | .                                 |
| rs57886497 | 22 | 32060863  | 0.00003   | 0.1196   | 0.0000324 | C22orf30(-11.38kb)                |
| rs58365021 | 22 | 32060838  | 0.00003   | 0.1196   | 0.0000324 | C22orf30(-11.4kb)                 |
| rs10492769 | 16 | 13773829  | 0.0000301 | 0.06517  | 0.0000266 | .                                 |
| rs7336052  | 13 | 38489284  | 0.0000302 | -0.07678 | 0.0000333 | .                                 |
| rs16989379 | 22 | 32058269  | 0.0000309 | 0.1194   | 0.0000335 | C22orf30(-13.97kb)                |
| rs56156742 | 22 | 32052738  | 0.0000309 | 0.1194   | 0.0000335 | C22orf30(-19.5kb)                 |
| rs62239180 | 22 | 32062608  | 0.0000311 | 0.1193   | 0.0000336 | C22orf30(-9.633kb)                |
| rs7290517  | 22 | 32063696  | 0.0000312 | 0.1197   | 0.0000336 | C22orf30(-8.545kb)                |
| rs62468397 | 7  | 131891790 | 0.0000313 | -0.1545  | 0.0000506 | PLXNA4(0)                         |
| rs12491131 | 3  | 112340432 | 0.0000317 | -0.07181 | 0.0000334 | CCDC80(0)                         |
| rs4916185  | 1  | 172388441 | 0.0000319 | -0.08907 | 0.000034  | DNM3(+6.584kb) C1orf105(-1.388kb) |
| rs7934777  | 11 | 78817269  | 0.0000321 | -0.09702 | 0.0000258 | ODZ4(0)                           |
| rs2374927  | 1  | 195455719 | 0.0000322 | -0.06507 | 0.0000295 | .                                 |
| rs62542128 | 9  | 26497587  | 0.0000322 | 0.1624   | 0.0000347 | .                                 |
| rs2773427  | 1  | 195545694 | 0.0000326 | -0.06278 | 0.0000327 | .                                 |
| rs185475   | 5  | 4348551   | 0.0000331 | -0.06732 | 0.0000355 | .                                 |
| rs10902513 | 12 | 132693487 | 0.0000341 | 0.05161  | 0.0000369 | .                                 |
| rs1863747  | 10 | 123166326 | 0.0000345 | -0.2313  | 0.0000355 | .                                 |
| rs56128775 | 10 | 123165270 | 0.0000345 | -0.2313  | 0.0000355 | .                                 |
| rs4609002  | 6  | 87365421  | 0.0000346 | 0.05128  | 0.0000392 | .                                 |
| rs1578475  | 13 | 106106804 | 0.0000349 | 0.05288  | 0.0000502 | DAOA(-11.56kb)                    |
| rs56004352 | 8  | 95318228  | 0.0000357 | 0.1196   | 0.0000293 | .                                 |
| rs59060370 | 8  | 95318225  | 0.0000357 | 0.1997   | 0.0000293 | .                                 |
| rs62239378 | 22 | 31699702  | 0.0000357 | 0.1997   | 0.0000367 | PIK3IP1(+11.23kb)                 |
| rs4243871  | 8  | 138309803 | 0.0000358 | -0.2172  | 0.000071  | .                                 |
| rs155356   | 5  | 4346529   | 0.0000363 | 0.1167   | 0.000042  | .                                 |
| rs62237446 | 22 | 31637663  | 0.0000363 | -0.06652 | 0.0000368 | LIMK2(0)                          |
| rs56136528 | 22 | 31559944  | 0.0000365 | 0.1162   | 0.0000347 | RNF185(0)                         |
| rs55888048 | 22 | 31577704  | 0.0000366 | 0.1208   | 0.0000366 | RNF185(0)                         |
| rs7545434  | 1  | 195454696 | 0.000037  | -0.06435 | 0.0000345 | .                                 |
| rs55796616 | 22 | 32294957  | 0.0000373 | 0.1084   | 0.0000391 | DEPDC5(0)                         |
| rs131237   | 22 | 32120373  | 0.0000374 | 0.1036   | 0.0000398 | C22orf30(+11.64kb)                |
| rs55934210 | 7  | 78339339  | 0.0000381 | -0.1503  | 0.0000436 | MAGI2(0)                          |
| rs60535405 | 8  | 26657403  | 0.0000392 | -0.1146  | 0.0000388 | ADRA1A(0)                         |

|            |    |           |           |          |           |                                 |
|------------|----|-----------|-----------|----------|-----------|---------------------------------|
| rs6992829  | 8  | 52189796  | 0.0000392 | 0.05712  | 0.0000428 | .                               |
| rs16837692 | 4  | 5812974   | 0.0000393 | -0.0711  | 0.0000372 | EVC(0) CRMP1(-9.516kb)          |
| rs62236183 | 22 | 31789484  | 0.0000398 | 0.1119   | 0.0000426 | DRG1(-6.054kb)                  |
| rs62236187 | 22 | 31806674  | 0.0000398 | 0.1119   | 0.0000426 | DRG1(0)                         |
| rs55997441 | 22 | 31627989  | 0.0000404 | 0.1164   | 0.0000407 | LIMK2(0)                        |
| rs2494739  | 14 | 105246989 | 0.0000405 | -0.101   | 0.0000476 | AKT1(0)                         |
| rs4657982  | 1  | 195454512 | 0.0000413 | -0.06393 | 0.0000385 | .                               |
| rs2157923  | 7  | 92604532  | 0.0000414 | 0.05159  | 0.0000423 | .                               |
| rs6701270  | 1  | 195446927 | 0.0000418 | -0.06336 | 0.000036  | .                               |
| rs11734691 | 4  | 58334190  | 0.0000424 | -0.06094 | 0.0000435 | .                               |
| rs261147   | 5  | 4352896   | 0.0000427 | -0.06655 | 0.000045  | .                               |
| rs261148   | 5  | 4352488   | 0.0000427 | -0.06655 | 0.000045  | .                               |
| rs2239994  | 15 | 91808728  | 0.0000438 | -0.06317 | 0.0000467 | SV2B(0)                         |
| rs4657980  | 1  | 195447074 | 0.0000438 | -0.07747 | 0.0000378 | .                               |
| rs35478695 | 1  | 184715417 | 0.0000442 | -0.05031 | 0.0000568 | EDEM3(0)                        |
| rs10411210 | 19 | 33532300  | 0.0000443 | -0.08605 | 0.0000417 | RHPN2(0)                        |
| rs1935591  | 6  | 87364090  | 0.0000447 | 0.05116  | 0.0000493 | .                               |
| rs16916798 | 8  | 95406276  | 0.000045  | 0.163    | 0.0000374 | RAD54B(0)                       |
| rs4734277  | 8  | 95403307  | 0.000045  | 0.163    | 0.0000374 | RAD54B(0)                       |
| rs58866206 | 8  | 95400471  | 0.000045  | 0.163    | 0.0000374 | RAD54B(0)                       |
| rs4780533  | 16 | 13770981  | 0.0000467 | 0.0634   | 0.0000399 | .                               |
| rs16989682 | 22 | 31900224  | 0.0000473 | 0.0635   | 0.0000475 | SFI1(0) EIF4ENIF1(+14.52kb)     |
| rs4781530  | 16 | 13770650  | 0.0000473 | 0.0635   | 0.0000393 | .                               |
| rs7202586  | 16 | 13768391  | 0.0000473 | 0.1211   | 0.0000393 | .                               |
| rs2324949  | 6  | 87344127  | 0.0000477 | -0.05052 | 0.0000553 | .                               |
| rs879092   | 1  | 4820966   | 0.0000483 | -0.09056 | 0.0000656 | AJAP1(0)                        |
| rs261146   | 5  | 4354442   | 0.0000484 | -0.06645 | 0.0000509 | .                               |
| rs62544062 | 9  | 26464282  | 0.0000487 | 0.1826   | 0.0000487 | .                               |
| rs932196   | 2  | 7126676   | 0.000049  | -0.058   | 0.0000659 | RNF144A(0)                      |
| rs7801759  | 7  | 92636278  | 0.0000492 | 0.04949  | 0.0000507 | .                               |
| rs623562   | 11 | 35508190  | 0.0000495 | -0.08533 | 0.0000402 | DKFZP586H2123(0)                |
| rs1935601  | 6  | 87352507  | 0.0000502 | -0.05056 | 0.0000582 | .                               |
| rs11992458 | 8  | 54439839  | 0.0000512 | -0.08167 | 0.000041  | .                               |
| rs62237848 | 22 | 32029658  | 0.0000513 | 0.1093   | 0.000059  | SFI1(+15.12kb) PISD(+2.848kb)   |
| rs35106590 | 1  | 152780421 | 0.0000515 | -0.08382 | 0.0000477 | LCE1A(-19.53kb) LCE1E(+19.52kb) |
| rs261151   | 5  | 4350760   | 0.0000517 | -0.06626 | 0.0000581 | .                               |
| rs12160763 | 22 | 31794754  | 0.0000522 | 0.1107   | 0.0000558 | DRG1(-0.784kb)                  |
| rs62239187 | 22 | 32071119  | 0.0000524 | 0.1049   | 0.0000549 | C22orf30(-1.122kb)              |
| rs55989726 | 8  | 95349558  | 0.0000533 | -0.06232 | 0.0000456 | .                               |
| rs7541511  | 1  | 195452650 | 0.0000533 | 0.1741   | 0.0000449 | .                               |
| rs59468162 | 8  | 95352589  | 0.0000537 | 0.1742   | 0.000045  | .                               |
| rs261153   | 5  | 4347803   | 0.0000538 | -0.06226 | 0.0000578 | .                               |
| rs6428288  | 1  | 195452860 | 0.0000538 | -0.06226 | 0.0000456 | .                               |
| rs7450863  | 6  | 87367811  | 0.0000538 | -0.06513 | 0.000062  | .                               |
| rs7541514  | 1  | 195452658 | 0.0000538 | 0.05009  | 0.0000456 | .                               |
| rs2618974  | 7  | 95450263  | 0.000054  | -0.08566 | 0.0000583 | DYNC1I1(0)                      |
| rs2690288  | 7  | 95450278  | 0.000054  | 0.0499   | 0.0000583 | DYNC1I1(0)                      |

|            |    |           |           |          |           |                             |
|------------|----|-----------|-----------|----------|-----------|-----------------------------|
| rs60507951 | 19 | 33544187  | 0.000054  | 0.0499   | 0.0000642 | RHPN2(0)                    |
| rs12945638 | 17 | 32884827  | 0.0000543 | -0.05431 | 0.0000514 | FLJ44815(-16.31kb)          |
| rs16989617 | 22 | 31839151  | 0.0000548 | 0.111    | 0.0000582 | EIF4ENIF1(0) DRG1(+8.979kb) |
| rs4735283  | 8  | 95320872  | 0.0000551 | 0.1908   | 0.0000458 | .                           |
| rs36086535 | 6  | 87362752  | 0.000057  | 0.04978  | 0.0000634 | .                           |
| rs261152   | 5  | 4348614   | 0.0000573 | -0.06558 | 0.00006   | .                           |
| rs6428287  | 1  | 195448040 | 0.0000578 | -0.06206 | 0.0000481 | .                           |
| rs6678481  | 1  | 195450375 | 0.0000578 | -0.06206 | 0.0000481 | .                           |
| rs7191035  | 16 | 13801319  | 0.0000582 | 0.06216  | 0.0000524 | .                           |
| rs324415   | 1  | 46858129  | 0.0000585 | -0.1012  | 0.0000642 | FAAH(-1.809kb)              |
| rs7874407  | 9  | 26522011  | 0.0000592 | 0.1564   | 0.0000677 | .                           |
| rs62544061 | 9  | 26463937  | 0.00006   | 0.1789   | 0.0000602 | .                           |
| rs12124714 | 1  | 184709564 | 0.0000601 | -0.04954 | 0.0000755 | EDEM3(0)                    |
| rs62237834 | 22 | 32015314  | 0.000061  | 0.1072   | 0.0000671 | SFI1(+0.78kb) PISD(0)       |
| rs11723440 | 4  | 58334484  | 0.0000611 | -0.05966 | 0.0000636 | .                           |
| rs28834379 | 15 | 25943257  | 0.0000621 | -0.1343  | 0.0000552 | ATP10A(0)                   |
| rs4816429  | 21 | 33648964  | 0.0000622 | 0.05565  | 0.0000606 | MRAP(-15.16kb) C21orf45(0)  |
| rs2152404  | 14 | 33466601  | 0.0000628 | 0.06805  | 0.0000605 | NPAS3(0)                    |
| rs2152405  | 14 | 33466603  | 0.0000628 | 0.06805  | 0.0000605 | NPAS3(0)                    |
| rs62543159 | 9  | 26457578  | 0.0000632 | 0.1768   | 0.0000642 | .                           |
| rs553401   | 3  | 62766018  | 0.0000633 | -0.0761  | 0.0000713 | CADPS(0)                    |
| rs553403   | 3  | 62766017  | 0.0000633 | -0.0761  | 0.0000713 | CADPS(0)                    |
| rs6802803  | 3  | 62765999  | 0.0000633 | -0.0761  | 0.0000713 | CADPS(0)                    |
| rs1954290  | 6  | 87351573  | 0.0000634 | -0.04945 | 0.0000702 | .                           |
| rs1954291  | 6  | 87352034  | 0.0000638 | -0.04941 | 0.0000746 | .                           |
| rs12635032 | 3  | 2255189   | 0.0000642 | -0.08421 | 0.0000614 | CNTN4(0)                    |
| rs7689182  | 4  | 37716715  | 0.0000644 | -0.04994 | 0.0000775 | .                           |
| rs10905432 | 10 | 8680784   | 0.0000645 | -0.06593 | 0.0000643 | .                           |
| rs2033294  | 7  | 84975931  | 0.0000646 | 0.05117  | 0.0000612 | .                           |
| rs11901569 | 2  | 58523045  | 0.0000651 | 0.1745   | 0.0000618 | .                           |
| rs6849876  | 4  | 58323931  | 0.0000651 | -0.05922 | 0.0000685 | .                           |
| rs62543157 | 9  | 26454617  | 0.0000657 | 0.1764   | 0.0000668 | .                           |
| rs1348114  | 4  | 58340318  | 0.0000661 | -0.0595  | 0.0000683 | .                           |
| rs4475208  | 4  | 58338064  | 0.0000661 | -0.0595  | 0.0000683 | .                           |
| rs6950763  | 7  | 84991184  | 0.0000664 | 0.05054  | 0.0000712 | .                           |
| rs10974630 | 9  | 4571216   | 0.0000667 | -0.05845 | 0.0000723 | SLC1A1(0)                   |
| rs13125956 | 4  | 37718097  | 0.000067  | -0.04999 | 0.0000683 | .                           |
| rs2732768  | 7  | 84952532  | 0.000067  | 0.05031  | 0.0000702 | .                           |
| rs958896   | 1  | 100267047 | 0.0000673 | -0.09049 | 0.0000677 | .                           |
| rs10911634 | 1  | 184668823 | 0.0000674 | -0.0514  | 0.0000914 | EDEM3(0)                    |
| rs34861692 | 4  | 58359465  | 0.0000676 | -0.0591  | 0.0000704 | .                           |
| rs2324950  | 6  | 87350271  | 0.0000677 | -0.04959 | 0.0000755 | .                           |
| rs10041713 | 5  | 124252550 | 0.0000678 | -0.07982 | 0.000059  | .                           |
| rs10793807 | 5  | 124252542 | 0.0000678 | -0.07982 | 0.000059  | .                           |
| rs9768802  | 7  | 92639145  | 0.0000678 | 0.04901  | 0.000069  | .                           |
| rs10754140 | 1  | 195448770 | 0.0000683 | -0.06143 | 0.0000583 | .                           |
| rs34175168 | 18 | 57180682  | 0.0000685 | 0.2141   | 0.0000797 | CCBE1(0)                    |

|            |    |           |           |          |           |                                   |
|------------|----|-----------|-----------|----------|-----------|-----------------------------------|
| rs11655897 | 17 | 32877548  | 0.000069  | 0.05426  | 0.0000509 | .                                 |
| rs2790072  | 1  | 195547293 | 0.0000693 | -0.05996 | 0.0000699 | .                                 |
| rs16970017 | 17 | 32880189  | 0.0000694 | -0.06399 | 0.0000743 | .                                 |
| rs60425434 | 8  | 95359316  | 0.0000694 | 0.1694   | 0.0000579 | .                                 |
| rs10853169 | 17 | 32887242  | 0.00007   | -0.05411 | 0.0000659 | FLJ44815(-13.9kb)                 |
| rs11734485 | 4  | 58324530  | 0.00007   | -0.05888 | 0.0000729 | .                                 |
| rs9360124  | 6  | 66052675  | 0.0000701 | 0.05427  | 0.0000743 | EGFL11(0)                         |
| rs62542125 | 9  | 26493216  | 0.0000702 | 0.1627   | 0.0000753 | .                                 |
| rs12509045 | 4  | 139307009 | 0.0000708 | -0.05219 | 0.0000623 | .                                 |
| rs17302673 | 4  | 139304675 | 0.0000708 | -0.05219 | 0.0000623 | .                                 |
| rs12952403 | 17 | 32885502  | 0.0000716 | -0.05329 | 0.0000695 | FLJ44815(-15.64kb)                |
| rs1441067  | 4  | 58332061  | 0.000072  | -0.05887 | 0.0000748 | .                                 |
| rs17600042 | 7  | 96661390  | 0.0000723 | -0.1141  | 0.0000625 | DLX5(+7.247kb)                    |
| rs12222365 | 11 | 98529903  | 0.0000728 | 0.05323  | 0.0000623 | .                                 |
| rs1061508  | 1  | 184662181 | 0.0000729 | -0.04864 | 0.0000954 | EDEM3(0)                          |
| rs62237803 | 22 | 31983903  | 0.0000729 | 0.1267   | 0.0000728 | SFI1(0)                           |
| rs12943903 | 17 | 32884958  | 0.000073  | 0.2062   | 0.0000727 | FLJ44815(-16.18kb)                |
| rs17556220 | 10 | 70716061  | 0.000073  | -0.05411 | 0.0000759 | DDX50(+9.458kb) DDX21(0)          |
| rs28403377 | 19 | 33540269  | 0.0000731 | 0.07861  | 0.0000851 | RHPN2(0)                          |
| rs6699725  | 1  | 161703525 | 0.0000731 | -0.08251 | 0.0000715 | FCRLA(+19.38kb) FCRLB(+5.592kb)   |
| rs958897   | 1  | 100267158 | 0.0000737 | -0.09017 | 0.0000743 | .                                 |
| rs1508351  | 6  | 87346787  | 0.0000738 | -0.04897 | 0.0000858 | .                                 |
| rs28637119 | 6  | 87349779  | 0.0000738 | -0.04897 | 0.0000858 | .                                 |
| rs7255601  | 19 | 33549775  | 0.0000739 | -0.08376 | 0.0000879 | RHPN2(0)                          |
| rs62237366 | 22 | 31548196  | 0.0000741 | 0.111    | 0.000074  | RNF185(-7.982kb) PLA2G3(+11.73kb) |
| rs34001608 | 10 | 132853817 | 0.0000752 | -0.1532  | 0.0000733 | .                                 |
| rs10053668 | 5  | 160600767 | 0.0000754 | 0.06552  | 0.0000735 | .                                 |
| rs10076116 | 5  | 160598882 | 0.0000754 | -0.09161 | 0.0000735 | .                                 |
| rs17271161 | 3  | 41566564  | 0.0000754 | -0.09161 | 0.0000793 | ULK4(0)                           |
| rs2696174  | 7  | 84967827  | 0.0000757 | 0.04965  | 0.0000781 | .                                 |
| rs2324951  | 6  | 87352434  | 0.000076  | -0.04894 | 0.0000882 | .                                 |
| rs34603935 | 8  | 4236904   | 0.0000761 | 0.04938  | 0.0000619 | CSMD1(0)                          |
| rs62479544 | 8  | 4236939   | 0.0000761 | 0.04938  | 0.0000619 | CSMD1(0)                          |
| rs13115041 | 4  | 37707375  | 0.0000765 | -0.04907 | 0.0000817 | RELL1(+19.38kb)                   |
| rs1173912  | 11 | 35511874  | 0.0000769 | -0.08301 | 0.0000632 | DKFZP586H2123(0)                  |
| rs589406   | 11 | 35511743  | 0.0000769 | -0.08301 | 0.0000632 | DKFZP586H2123(0)                  |
| rs9369409  | 6  | 43346462  | 0.0000769 | 0.04818  | 0.0000824 | ZNF318(+9.281kb)                  |
| rs11947058 | 4  | 58342089  | 0.0000773 | -0.05902 | 0.0000796 | .                                 |
| rs13122056 | 4  | 58327688  | 0.0000774 | -0.05845 | 0.0000813 | .                                 |
| rs17831752 | 4  | 58327171  | 0.0000774 | -0.05845 | 0.0000813 | .                                 |
| rs10932855 | 2  | 221207438 | 0.0000777 | -0.06082 | 0.00009   | .                                 |
| rs12147399 | 14 | 36875728  | 0.0000798 | -0.0563  | 0.0000831 | .                                 |
| rs12937793 | 17 | 32893649  | 0.0000798 | 0.0506   | 0.0000636 | TMEM132E(-14.12kb) FLJ44815(-7.4  |
| rs2875112  | 11 | 129280539 | 0.00008   | 0.08287  | 0.0000948 | BARX2(0)                          |
| rs9519679  | 13 | 106110385 | 0.00008   | 0.04959  | 0.0001096 | DAOA(-7.978kb)                    |
| rs4262519  | 1  | 87728007  | 0.0000802 | 0.04891  | 0.0000622 | .                                 |
| rs7520252  | 1  | 87734757  | 0.0000802 | 0.04891  | 0.0000622 | .                                 |

|            |    |           |           |          |           |                                   |
|------------|----|-----------|-----------|----------|-----------|-----------------------------------|
| rs953932   | 3  | 41567962  | 0.0000802 | 0.0644   | 0.0000859 | ULK4(0)                           |
| rs3933099  | 3  | 112352947 | 0.000081  | -0.06657 | 0.0000905 | CCDC80(0)                         |
| rs17063849 | 4  | 177804839 | 0.0000814 | 0.07489  | 0.0000572 | .                                 |
| rs13279543 | 8  | 117809105 | 0.0000815 | 0.07286  | 0.0000775 | .                                 |
| rs62240684 | 22 | 32095147  | 0.0000818 | 0.1024   | 0.0000893 | C22orf30(0)                       |
| rs1612774  | 7  | 95469291  | 0.0000827 | 0.04894  | 0.0000823 | DYNC111(0)                        |
| rs8141719  | 22 | 32095499  | 0.0000834 | 0.1016   | 0.0000929 | C22orf30(0)                       |
| rs12541117 | 8  | 95453892  | 0.0000837 | 0.1557   | 0.0000747 | RAD54B(0)                         |
| rs11733782 | 4  | 58325108  | 0.0000838 | -0.0582  | 0.0000875 | .                                 |
| rs1835285  | 7  | 84971630  | 0.0000838 | 0.04932  | 0.000087  | .                                 |
| rs56107942 | 6  | 154731006 | 0.000084  | -0.2006  | 0.0000629 | CNKSR3(0)                         |
| rs581788   | 11 | 94815874  | 0.0000843 | 0.0469   | 0.000099  | SFRS2B(+11.49kb) ENDOD1(-7.142kb) |
| rs2732765  | 7  | 84957230  | 0.0000845 | 0.04928  | 0.0000876 | .                                 |
| rs590102   | 11 | 35513053  | 0.0000846 | -0.08241 | 0.0000714 | DKFZP586H2123(0)                  |
| rs10437406 | 10 | 20791363  | 0.0000849 | -0.165   | 0.000084  | .                                 |
| rs10437427 | 10 | 20791386  | 0.0000849 | -0.165   | 0.000084  | .                                 |
| rs12250109 | 10 | 20791863  | 0.0000849 | -0.165   | 0.000084  | .                                 |
| rs7920043  | 10 | 20789900  | 0.0000849 | -0.165   | 0.000084  | .                                 |
| rs7920275  | 10 | 20790084  | 0.0000849 | -0.165   | 0.000084  | .                                 |
| rs12032144 | 1  | 184687576 | 0.0000852 | -0.0479  | 0.0001124 | EDEM3(0)                          |
| rs11725834 | 4  | 58342715  | 0.000086  | -0.05863 | 0.0000892 | .                                 |
| rs62439021 | 6  | 87312134  | 0.0000861 | -0.06906 | 0.0001071 | .                                 |
| rs4795934  | 17 | 32876707  | 0.0000863 | 0.054    | 0.0000616 | .                                 |
| rs9899133  | 17 | 67876391  | 0.0000866 | -0.06468 | 0.0000935 | .                                 |
| rs9993902  | 4  | 58343427  | 0.0000866 | -0.05856 | 0.0000901 | .                                 |
| rs13131369 | 4  | 37718034  | 0.0000875 | -0.04922 | 0.0000902 | .                                 |
| rs12254460 | 10 | 20794045  | 0.0000876 | -0.1645  | 0.000089  | .                                 |
| rs12254775 | 10 | 20794521  | 0.0000876 | -0.1645  | 0.000089  | .                                 |
| rs11725660 | 4  | 58328884  | 0.0000883 | -0.05819 | 0.000086  | .                                 |
| rs6495315  | 15 | 78981758  | 0.0000888 | 0.2089   | 0.0000867 | .                                 |
| rs12265322 | 10 | 20791912  | 0.0000889 | -0.1647  | 0.0000872 | .                                 |
| rs4864412  | 4  | 138266800 | 0.0000893 | -0.05565 | 0.0000887 | .                                 |
| rs2374614  | 7  | 92609705  | 0.0000902 | 0.04932  | 0.0000966 | .                                 |
| rs11166926 | 8  | 140795752 | 0.0000904 | -0.0474  | 0.0001111 | NIBP(0)                           |
| rs1405974  | 7  | 84956670  | 0.0000905 | -0.05664 | 0.0000926 | .                                 |
| rs2564777  | 7  | 84958189  | 0.0000905 | 0.04911  | 0.0000926 | .                                 |
| rs2564780  | 7  | 84964905  | 0.0000905 | 0.04911  | 0.0000926 | .                                 |
| rs2696173  | 7  | 84965793  | 0.0000905 | 0.04911  | 0.0000926 | .                                 |
| rs9294358  | 6  | 87333241  | 0.0000905 | 0.04911  | 0.0000942 | .                                 |
| rs11885675 | 2  | 58522661  | 0.0000911 | 0.159    | 0.0000829 | .                                 |
| rs11886987 | 2  | 58523124  | 0.0000911 | 0.159    | 0.0000829 | .                                 |
| rs11899695 | 2  | 58526934  | 0.0000911 | 0.159    | 0.0000829 | .                                 |
| rs13125455 | 4  | 58346101  | 0.0000917 | -0.05832 | 0.000096  | .                                 |
| rs2564778  | 7  | 84958416  | 0.0000919 | 0.1157   | 0.0000923 | .                                 |
| rs7288051  | 22 | 32013816  | 0.0000919 | 0.04916  | 0.000095  | SFI1(0) PISD(-0.662kb)            |
| rs62238935 | 22 | 32301770  | 0.0000924 | 0.06996  | 0.0000836 | DEPDC5(0)                         |
| rs16962723 | 16 | 13803064  | 0.0000932 | 0.05999  | 0.0000834 | .                                 |

|            |    |           |           |          |           |                                  |
|------------|----|-----------|-----------|----------|-----------|----------------------------------|
| rs6931825  | 6  | 144079788 | 0.0000932 | -0.07693 | 0.0000985 | PHACTR2(0)                       |
| rs4772687  | 13 | 106113547 | 0.0000939 | 0.04928  | 0.0001311 | DAOA(-4.816kb)                   |
| rs1429748  | 7  | 84972738  | 0.0000941 | 0.04912  | 0.0000965 | .                                |
| rs10504937 | 8  | 95421050  | 0.000095  | 0.04829  | 0.000081  | RAD54B(0)                        |
| rs12541176 | 8  | 95424066  | 0.000095  | -0.06502 | 0.000081  | RAD54B(0)                        |
| rs7397715  | 12 | 132695710 | 0.000095  | 0.1569   | 0.0001073 | .                                |
| rs8044125  | 16 | 89624574  | 0.000095  | 0.1569   | 0.0001046 | SPG7(+0.4kb) RPL13(-2.515kb) CPN |
| rs11067585 | 12 | 115853437 | 0.0000951 | -0.05306 | 0.000084  | .                                |
| rs7222340  | 17 | 67862505  | 0.0000954 | -0.06374 | 0.0001033 | .                                |
| rs1508349  | 6  | 87322664  | 0.0000955 | -0.06816 | 0.0001205 | .                                |
| rs1468548  | 17 | 32877472  | 0.000096  | -0.06437 | 0.0001038 | .                                |
| rs1677841  | 7  | 95467516  | 0.000096  | 0.04828  | 0.0000907 | DYNC111(0)                       |
| rs13062908 | 3  | 41558427  | 0.0000961 | 0.06409  | 0.000103  | ULK4(0)                          |
| rs34845043 | 3  | 41565804  | 0.0000961 | 0.06409  | 0.000103  | ULK4(0)                          |
| rs13433130 | 20 | 24387445  | 0.0000966 | -0.1996  | 0.000093  | .                                |
| rs11990068 | 8  | 52197895  | 0.0000968 | 0.0537   | 0.0001124 | .                                |
| rs35449568 | 6  | 87326049  | 0.0000974 | -0.0681  | 0.0001236 | .                                |
| rs1030620  | 18 | 39455512  | 0.0000975 | -0.04748 | 0.0001466 | .                                |
| rs62543158 | 9  | 26457005  | 0.0000977 | 0.1767   | 0.0000972 | .                                |
| rs59754231 | 4  | 138294341 | 0.0000979 | -0.05496 | 0.0000947 | .                                |
| rs9519675  | 13 | 106107964 | 0.000098  | 0.04913  | 0.0001347 | DAOA(-10.4kb)                    |
| rs7803519  | 7  | 92640666  | 0.0000984 | 0.04862  | 0.0000976 | .                                |
| rs4817480  | 21 | 33668024  | 0.0000988 | 0.05036  | 0.0001076 | MRAP(0) C21orf45(+16.65kb)       |
| rs4729057  | 7  | 92635659  | 0.0000992 | 0.04832  | 0.0000976 | .                                |
| rs7258173  | 19 | 33554109  | 0.0000994 | -0.08182 | 0.0001164 | RHPN2(0) GPATCH1(-17.68kb)       |
| rs62237437 | 22 | 31610506  | 0.0000997 | 0.1092   | 0.000101  | RNF185(+7.506kb) LIMK2(0)        |
| rs12254509 | 10 | 20794085  | 0.0001005 | -0.1603  | 0.0001069 | .                                |
| rs16989620 | 22 | 31839244  | 0.0001012 | 0.1154   | 0.0001042 | EIF4ENIF1(0) DRG1(+9.072kb)      |
| rs13135737 | 4  | 138290191 | 0.0001016 | -0.05477 | 0.0000994 | .                                |
| rs12600918 | 17 | 32895875  | 0.0001017 | 0.04975  | 0.0000817 | TMEM132E(-11.89kb) FLJ44815(-5.2 |
| rs9548107  | 13 | 38497210  | 0.0001021 | -0.07014 | 0.0001191 | .                                |
| rs13102887 | 4  | 58350801  | 0.0001027 | -0.0573  | 0.000109  | .                                |
| rs57841232 | 8  | 114663000 | 0.0001027 | 0.2091   | 0.0001086 | .                                |
| rs6473594  | 8  | 52229921  | 0.0001029 | 0.05372  | 0.0001222 | PXDNL(-2.215kb)                  |
| rs1434342  | 13 | 105266918 | 0.0001031 | 0.05763  | 0.0001128 | .                                |
| rs35347633 | 3  | 41544907  | 0.0001031 | 0.06462  | 0.0001046 | ULK4(0)                          |
| rs17794609 | 16 | 13791465  | 0.0001036 | 0.06449  | 0.000095  | .                                |
| rs62544063 | 9  | 26465331  | 0.0001039 | 0.1758   | 0.0001062 | .                                |
| rs7217712  | 17 | 32894641  | 0.000104  | 0.04961  | 0.0000846 | TMEM132E(-13.13kb) FLJ44815(-6.5 |
| rs1415628  | 13 | 38498568  | 0.0001042 | -0.06989 | 0.0001227 | .                                |
| rs9315526  | 13 | 38496577  | 0.0001042 | -0.06989 | 0.0001227 | .                                |
| rs9548104  | 13 | 38497102  | 0.0001042 | -0.06989 | 0.0001227 | .                                |
| rs9548109  | 13 | 38499760  | 0.0001042 | -0.06989 | 0.0001227 | .                                |
| rs9428107  | 1  | 118858218 | 0.0001043 | -0.07684 | 0.000081  | .                                |
| rs10424333 | 19 | 33527596  | 0.0001046 | -0.08265 | 0.0000991 | RHPN2(0)                         |
| rs11880141 | 19 | 33526948  | 0.0001046 | -0.08265 | 0.0000991 | RHPN2(0)                         |
| rs12944367 | 17 | 32893550  | 0.0001048 | 0.04987  | 0.0000829 | TMEM132E(-14.22kb) FLJ44815(-7.5 |

|            |    |           |           |          |           |                                  |
|------------|----|-----------|-----------|----------|-----------|----------------------------------|
| rs2126128  | 8  | 140788299 | 0.0001052 | -0.04927 | 0.0001272 | NIBP(0)                          |
| rs11881367 | 19 | 33551428  | 0.0001054 | -0.08139 | 0.0001241 | RHPN2(0)                         |
| rs11992169 | 8  | 52178838  | 0.0001054 | 0.05293  | 0.0001266 | .                                |
| rs17794615 | 16 | 13791699  | 0.0001058 | 0.0604   | 0.0000937 | .                                |
| rs7249860  | 19 | 33551772  | 0.0001058 | -0.0814  | 0.0001239 | RHPN2(0)                         |
| rs9519671  | 13 | 106105590 | 0.0001059 | 0.04867  | 0.0001468 | DAOA(-12.77kb)                   |
| rs261139   | 5  | 4360537   | 0.0001062 | -0.06269 | 0.0001092 | .                                |
| rs10093512 | 8  | 52175026  | 0.0001064 | 0.05287  | 0.0001275 | .                                |
| rs12600948 | 17 | 32895356  | 0.0001071 | 0.04976  | 0.0000849 | TMEM132E(-12.41kb) FLJ44815(-5.7 |
| rs2066706  | 15 | 25932990  | 0.0001073 | -0.1283  | 0.0000955 | ATP10A(0)                        |
| rs62063917 | 17 | 32888567  | 0.0001077 | 0.05358  | 0.0000759 | TMEM132E(-19.2kb) FLJ44815(-12.5 |
| rs17302652 | 4  | 139304603 | 0.0001078 | -0.05141 | 0.0001007 | .                                |
| rs7807666  | 7  | 92641079  | 0.000109  | 0.051    | 0.000113  | .                                |
| rs4393677  | 18 | 57168780  | 0.0001108 | 0.2054   | 0.000128  | CCBE1(0)                         |
| rs56672175 | 18 | 57171116  | 0.0001108 | 0.2054   | 0.000128  | CCBE1(0)                         |
| rs8132833  | 21 | 33668493  | 0.0001108 | 0.04939  | 0.0001276 | MRAP(0) C21orf45(+17.12kb)       |
| rs552946   | 7  | 138642602 | 0.000111  | 0.113    | 0.0001183 | .                                |
| rs62236231 | 22 | 31905564  | 0.000111  | 0.113    | 0.0001146 | SFI1(0) EIF4ENIF1(+19.86kb)      |
| rs62236232 | 22 | 31905828  | 0.000111  | 0.05062  | 0.0001146 | SFI1(0)                          |
| rs6469466  | 8  | 114644531 | 0.0001112 | 0.2135   | 0.0001175 | .                                |
| rs62439017 | 6  | 87310322  | 0.0001113 | -0.05596 | 0.0001127 | .                                |
| rs1483647  | 17 | 71514191  | 0.000113  | 0.04932  | 0.0001366 | .                                |
| rs1483648  | 17 | 71514187  | 0.000113  | 0.04932  | 0.0001366 | .                                |
| rs12545462 | 8  | 140798210 | 0.0001133 | 0.04703  | 0.0001393 | NIBP(0)                          |
| rs10958255 | 8  | 52178191  | 0.0001136 | 0.05305  | 0.0001361 | .                                |
| rs36185331 | 1  | 100260640 | 0.0001137 | -0.08802 | 0.0001138 | .                                |
| rs6133605  | 20 | 8673575   | 0.000114  | -0.1514  | 0.0001092 | PLCB1(0)                         |
| rs6140693  | 20 | 8675039   | 0.000114  | -0.1514  | 0.0001092 | PLCB1(0)                         |
| rs7265041  | 20 | 8669935   | 0.000114  | -0.1514  | 0.0001092 | PLCB1(0)                         |
| rs17794561 | 16 | 13766080  | 0.0001144 | 0.06115  | 0.0000994 | .                                |
| rs10095889 | 8  | 117758844 | 0.0001146 | 0.05584  | 0.0001006 | UTP23(-19.9kb) EIF3H(0)          |
| rs10892005 | 11 | 98462369  | 0.0001147 | 0.04972  | 0.0001095 | .                                |
| rs12600962 | 17 | 32895461  | 0.000115  | 0.04932  | 0.0000926 | TMEM132E(-12.31kb) FLJ44815(-5.6 |
| rs34393442 | 4  | 58347879  | 0.0001151 | -0.05985 | 0.0001318 | .                                |
| rs11987046 | 8  | 55320060  | 0.0001155 | -0.1908  | 0.0001155 | .                                |
| rs7455090  | 7  | 84971780  | 0.0001163 | 0.04837  | 0.0001204 | .                                |
| rs16927334 | 10 | 27077357  | 0.0001164 | -0.06209 | 0.000133  | ABI1(0)                          |
| rs946024   | 13 | 101942672 | 0.0001165 | 0.09311  | 0.0001342 | NALCN(0)                         |
| rs9425633  | 1  | 184657251 | 0.0001168 | -0.04734 | 0.0001274 | EDEM3(-2.373kb)                  |
| rs8101981  | 19 | 16144586  | 0.000117  | -0.04867 | 0.0001305 | .                                |
| rs1527928  | 7  | 84932825  | 0.0001171 | 0.04785  | 0.0001155 | .                                |
| rs7843275  | 8  | 52177946  | 0.0001173 | 0.05256  | 0.0001405 | .                                |
| rs12956996 | 18 | 57161975  | 0.0001186 | 0.2315   | 0.0001394 | CCBE1(0)                         |
| rs12505439 | 4  | 139301744 | 0.0001187 | 0.04921  | 0.0001064 | .                                |
| rs12947545 | 17 | 32895133  | 0.0001187 | -0.05049 | 0.0000958 | TMEM132E(-12.63kb) FLJ44815(-6.0 |
| rs16945485 | 15 | 91805261  | 0.0001197 | -0.06581 | 0.0001177 | SV2B(0)                          |
| rs7226276  | 17 | 71512885  | 0.0001198 | 0.04937  | 0.0001421 | .                                |



|            |    |           |           |          |           |                                   |
|------------|----|-----------|-----------|----------|-----------|-----------------------------------|
| rs5998079  | 22 | 32069414  | 0.00012   | 0.09908  | 0.0001254 | C22orf30(-2.827kb)                |
| rs12966739 | 18 | 57188494  | 0.0001208 | 0.2071   | 0.0001344 | CCBE1(0)                          |
| rs34983675 | 18 | 57181064  | 0.000121  | 0.1968   | 0.000141  | CCBE1(0)                          |
| rs9657149  | 8  | 52195991  | 0.000121  | 0.05272  | 0.0001442 | .                                 |
| rs62439016 | 6  | 87310131  | 0.0001213 | -0.05639 | 0.000123  | .                                 |
| rs2732766  | 7  | 84954624  | 0.0001215 | 0.04833  | 0.0001222 | .                                 |
| rs12600947 | 17 | 32895325  | 0.0001222 | 0.04965  | 0.0000993 | TMEM132E(-12.44kb) FLJ44815(-5.8  |
| rs1046239  | 1  | 184660205 | 0.0001224 | -0.04724 | 0.0001513 | EDEM3(0)                          |
| rs3755642  | 3  | 148941601 | 0.0001229 | -0.09497 | 0.0001393 | CP(+1.769kb)                      |
| rs7218804  | 17 | 32894283  | 0.000123  | 0.0491   | 0.0000993 | TMEM132E(-13.48kb) FLJ44815(-6.8  |
| rs4943551  | 13 | 38504090  | 0.0001235 | -0.06925 | 0.0001485 | .                                 |
| rs11792025 | 9  | 89983936  | 0.0001237 | 0.05707  | 0.000129  | .                                 |
| rs1434344  | 13 | 105269066 | 0.0001237 | -0.07667 | 0.0001297 | .                                 |
| rs16884805 | 8  | 114545787 | 0.000124  | 0.2313   | 0.0001356 | .                                 |
| rs16884821 | 8  | 114554238 | 0.000124  | 0.2313   | 0.0001356 | .                                 |
| rs4532622  | 8  | 114544602 | 0.000124  | 0.2313   | 0.0001356 | .                                 |
| rs10783484 | 12 | 52331681  | 0.0001241 | 0.05447  | 0.000143  | ACVRL1(+14.54kb) ACVR1B(-13.8kb)  |
| rs9619222  | 22 | 32068917  | 0.0001249 | 0.09856  | 0.0001311 | C22orf30(-3.324kb)                |
| rs61792524 | 3  | 170488712 | 0.000125  | 0.0629   | 0.000104  | .                                 |
| rs4432994  | 6  | 143244821 | 0.0001264 | 0.1488   | 0.0001284 | HIVEP2(0)                         |
| rs4077838  | 12 | 132692165 | 0.0001265 | 0.04728  | 0.0001565 | .                                 |
| rs8105113  | 19 | 16144627  | 0.0001271 | -0.04738 | 0.000148  | .                                 |
| rs8109970  | 19 | 33557530  | 0.0001272 | -0.08107 | 0.0001221 | RHPN2(+1.736kb) GPATCH1(-14.26kb) |
| rs60324934 | 22 | 31875654  | 0.0001276 | 0.1177   | 0.0001259 | SFI1(-16.61kb) EIF4ENIF1(0)       |
| rs62236225 | 22 | 31874794  | 0.0001276 | 0.1177   | 0.0001259 | SFI1(-17.47kb) EIF4ENIF1(0)       |
| rs62236226 | 22 | 31874806  | 0.0001276 | 0.1177   | 0.0001259 | SFI1(-17.45kb) EIF4ENIF1(0)       |
| rs12160737 | 22 | 32071195  | 0.0001279 | 0.09841  | 0.0001347 | C22orf30(-1.046kb)                |
| rs5998080  | 22 | 32070158  | 0.0001279 | 0.09841  | 0.0001347 | C22orf30(-2.083kb)                |
| rs62239185 | 22 | 32070912  | 0.0001279 | 0.09841  | 0.0001347 | C22orf30(-1.329kb)                |
| rs1946213  | 8  | 140726933 | 0.000128  | -0.04691 | 0.0001275 | NIBP(-15.65kb) KCNK9(+11.63kb)    |
| rs16914582 | 10 | 61941275  | 0.0001282 | 0.09983  | 0.0001265 | ANK3(0)                           |
| rs34544559 | 13 | 38501932  | 0.0001282 | -0.07172 | 0.0001459 | .                                 |
| rs8083478  | 18 | 68378287  | 0.0001282 | 0.05273  | 0.0001486 | .                                 |
| rs10152301 | 15 | 25930845  | 0.0001283 | -0.1274  | 0.0001131 | ATP10A(0)                         |
| rs6133609  | 20 | 8689441   | 0.0001289 | -0.1636  | 0.0001215 | PLCB1(0)                          |
| rs10519420 | 4  | 138313173 | 0.000129  | -0.05484 | 0.0001273 | .                                 |
| rs610814   | 11 | 94813709  | 0.0001297 | 0.04629  | 0.0001426 | SFRS2B(+9.321kb) ENDOD1(-9.307kb) |
| rs7008671  | 8  | 66474399  | 0.0001297 | -0.07072 | 0.0000989 | .                                 |
| rs11577639 | 1  | 118855795 | 0.0001299 | -0.07593 | 0.0001011 | .                                 |
| rs9428106  | 1  | 118856788 | 0.0001299 | -0.07593 | 0.0001011 | .                                 |
| rs7845311  | 8  | 52227396  | 0.0001308 | 0.05313  | 0.0001567 | PXDNL(-4.74kb)                    |
| rs4393280  | 11 | 98472484  | 0.0001309 | 0.05326  | 0.0001148 | .                                 |
| rs7927094  | 11 | 98540656  | 0.0001312 | 0.06479  | 0.0001178 | .                                 |
| rs1860840  | 7  | 140274776 | 0.0001322 | -0.04729 | 0.0001733 | DENND2A(0)                        |
| rs12473780 | 2  | 179162589 | 0.0001323 | 0.04797  | 0.0001373 | OSBPL6(0)                         |
| rs1370445  | 8  | 52249599  | 0.0001325 | 0.0518   | 0.0001854 | PXDNL(0)                          |
| rs35469299 | 1  | 152783739 | 0.0001326 | -0.07486 | 0.0001236 | LCE1A(-16.21kb) LCE1C(+4.632kb)   |

|            |    |           |           |          |           |                                   |
|------------|----|-----------|-----------|----------|-----------|-----------------------------------|
| rs55664935 | 1  | 41060627  | 0.000133  | -0.06719 | 0.0001138 | .                                 |
| rs1499317  | 13 | 69083101  | 0.0001331 | -0.0619  | 0.0001472 | .                                 |
| rs62236257 | 22 | 31918260  | 0.0001332 | 0.1121   | 0.0001369 | SFI1(0)                           |
| rs2732780  | 7  | 84939778  | 0.0001334 | 0.04785  | 0.0001295 | .                                 |
| rs10089520 | 8  | 11686089  | 0.0001339 | -0.0767  | 0.000138  | FDFT1(0) CTSB(-13.94kb)           |
| rs11241776 | 5  | 124245469 | 0.0001339 | -0.05912 | 0.0001136 | .                                 |
| rs546812   | 11 | 75023093  | 0.0001341 | 0.04614  | 0.0001527 | ARRB1(0)                          |
| rs62237760 | 22 | 31925728  | 0.0001344 | 0.112    | 0.0001387 | SFI1(0)                           |
| rs62439014 | 6  | 87309526  | 0.0001344 | -0.05511 | 0.0001384 | .                                 |
| rs7658098  | 4  | 138271729 | 0.0001349 | -0.05403 | 0.000135  | .                                 |
| rs11743521 | 5  | 124262682 | 0.0001351 | -0.0767  | 0.0001106 | .                                 |
| rs4514005  | 8  | 117782385 | 0.0001352 | 0.05822  | 0.0001183 | UTP23(0) EIF3H(+14.32kb)          |
| rs4521822  | 9  | 105315604 | 0.0001352 | -0.04695 | 0.0001521 | .                                 |
| rs7248625  | 19 | 33564862  | 0.0001355 | -0.08026 | 0.0001614 | RHPN2(+9.068kb) GPATCH1(-6.923kb) |
| rs35243089 | 3  | 54175424  | 0.0001357 | 0.1107   | 0.0001404 | CACNA2D3(0)                       |
| rs17444730 | 12 | 40806480  | 0.0001367 | -0.06809 | 0.0001204 | .                                 |
| rs11857061 | 15 | 91828691  | 0.0001382 | -0.07381 | 0.0001374 | SV2B(0)                           |
| rs55916646 | 22 | 32044479  | 0.0001382 | 0.1018   | 0.0001541 | PISD(+17.67kb)                    |
| rs681134   | 11 | 94802952  | 0.0001383 | 0.04667  | 0.0001458 | SFRS2B(0)                         |
| rs9915890  | 17 | 67871306  | 0.0001384 | -0.06395 | 0.0001426 | .                                 |
| rs2191057  | 17 | 32891054  | 0.0001386 | -0.06211 | 0.0001452 | TMEM132E(-16.71kb) FLJ44815(-10.  |
| rs4714678  | 6  | 43342591  | 0.000139  | 0.04591  | 0.0001472 | ZNF318(+5.41kb)                   |
| rs11624409 | 14 | 96320240  | 0.0001396 | 0.09431  | 0.0001505 | .                                 |
| rs7250288  | 19 | 33562464  | 0.0001396 | -0.08012 | 0.0001657 | RHPN2(+6.67kb) GPATCH1(-9.321kb)  |
| rs62510194 | 8  | 117763178 | 0.0001402 | 0.05539  | 0.0001235 | UTP23(-15.56kb) EIF3H(0)          |
| rs10128544 | 11 | 98461972  | 0.0001406 | 0.04872  | 0.0001418 | .                                 |
| rs28363937 | 19 | 33540212  | 0.0001407 | -0.0793  | 0.0001575 | RHPN2(0)                          |
| rs2187676  | 16 | 13787079  | 0.0001408 | 0.05896  | 0.0001235 | .                                 |
| rs4865232  | 4  | 58323750  | 0.0001417 | -0.05638 | 0.0001522 | .                                 |
| rs6899875  | 6  | 31154897  | 0.0001417 | -0.06249 | 0.0001532 | POU5F1(+16.45kb) HCG27(-10.7kb)   |
| rs1994540  | 8  | 118466559 | 0.0001424 | 0.04931  | 0.0001362 | .                                 |
| rs5998098  | 22 | 32100550  | 0.0001425 | 0.09677  | 0.0001556 | C22orf30(0)                       |
| rs7824632  | 8  | 55298982  | 0.0001425 | -0.1964  | 0.0001444 | .                                 |
| rs622175   | 11 | 94813500  | 0.0001428 | 0.04578  | 0.0001581 | SFRS2B(+9.112kb) ENDOD1(-9.516kb) |
| rs6949790  | 7  | 92636769  | 0.0001437 | 0.04907  | 0.0001528 | .                                 |
| rs7214380  | 17 | 32886639  | 0.0001444 | -0.05096 | 0.000141  | FLJ44815(-14.5kb)                 |
| rs11984904 | 8  | 55300233  | 0.0001445 | -0.1962  | 0.0001466 | .                                 |
| rs4636637  | 11 | 98463965  | 0.0001447 | 0.04879  | 0.0001292 | .                                 |
| rs4781531  | 16 | 13781559  | 0.0001449 | 0.05893  | 0.0001273 | .                                 |
| rs9298441  | 8  | 52190247  | 0.0001449 | 0.05197  | 0.0001734 | .                                 |
| rs6896024  | 5  | 118542922 | 0.0001452 | -0.07948 | 0.0001415 | DMXL1(0)                          |
| rs9428243  | 1  | 118855637 | 0.0001452 | -0.06552 | 0.0001154 | .                                 |
| rs7256899  | 19 | 33558462  | 0.0001454 | -0.07973 | 0.0001709 | RHPN2(+2.668kb) GPATCH1(-13.32kb) |
| rs2326282  | 16 | 84586132  | 0.0001456 | -0.06124 | 0.0001403 | COTL1(-13.07kb)                   |
| rs7920164  | 10 | 27033950  | 0.0001456 | -0.09822 | 0.0001608 | PDSS1(0) ABI1(-1.574kb)           |
| rs12764628 | 10 | 27118560  | 0.000146  | -0.06129 | 0.0001665 | ABI1(0)                           |
| rs2280370  | 16 | 89627460  | 0.000146  | -0.06833 | 0.0001551 | SPG7(+3.286kb) RPL13(0) CPNE7(-1  |

|            |    |           |           |          |           |                                   |
|------------|----|-----------|-----------|----------|-----------|-----------------------------------|
| rs6563574  | 13 | 38508150  | 0.000146  | -0.06304 | 0.0001785 | .                                 |
| rs6995228  | 8  | 114666050 | 0.000146  | 0.2219   | 0.0001483 | .                                 |
| rs62237836 | 22 | 32020314  | 0.0001464 | 0.1028   | 0.0001687 | SFI1(+5.78kb) PISD(0)             |
| rs62237837 | 22 | 32020867  | 0.0001464 | 0.1028   | 0.0001687 | SFI1(+6.333kb) PISD(0)            |
| rs62237838 | 22 | 32021596  | 0.0001464 | 0.1028   | 0.0001687 | SFI1(+7.062kb) PISD(0)            |
| rs12652881 | 5  | 124258221 | 0.0001469 | -0.07394 | 0.0001247 | .                                 |
| rs35171122 | 18 | 57175990  | 0.000147  | 0.1969   | 0.0001703 | CCBE1(0)                          |
| rs12719254 | 5  | 118537292 | 0.0001471 | -0.06529 | 0.0001422 | DMXL1(0)                          |
| rs1527929  | 7  | 84932519  | 0.0001482 | 0.0471   | 0.0001455 | .                                 |
| rs2564771  | 7  | 84940599  | 0.0001482 | 0.0471   | 0.0001455 | .                                 |
| rs2732778  | 7  | 84940786  | 0.0001482 | 0.0471   | 0.0001455 | .                                 |
| rs11743554 | 5  | 124262754 | 0.0001483 | -0.07395 | 0.0001248 | .                                 |
| rs36041674 | 5  | 124261761 | 0.0001483 | -0.07395 | 0.0001248 | .                                 |
| rs9327340  | 5  | 124260544 | 0.0001483 | -0.07395 | 0.0001248 | .                                 |
| rs4464999  | 8  | 117789505 | 0.0001489 | 0.05563  | 0.0001383 | UTP23(+5.308kb)                   |
| rs56059033 | 20 | 8679854   | 0.0001496 | -0.147   | 0.0001435 | PLCB1(0)                          |
| rs4864625  | 4  | 58341021  | 0.0001501 | -0.05921 | 0.0001658 | .                                 |
| rs2564772  | 7  | 84943217  | 0.0001503 | 0.04715  | 0.0001469 | .                                 |
| rs2732777  | 7  | 84942143  | 0.0001503 | 0.04715  | 0.0001469 | .                                 |
| rs17145892 | 11 | 62200269  | 0.0001507 | -0.06046 | 0.0001863 | SCGB1A1(+9.602kb) AHNAK(-0.746kb) |
| rs243866   | 16 | 55511537  | 0.0001508 | 0.05519  | 0.0001744 | MMP2(-1.543kb)                    |
| rs1346686  | 7  | 84956802  | 0.0001511 | 0.04775  | 0.0001528 | .                                 |
| rs16995111 | 20 | 8679884   | 0.0001524 | -0.1592  | 0.0001469 | PLCB1(0)                          |
| rs62237843 | 22 | 32026946  | 0.0001525 | 0.1046   | 0.0001727 | SFI1(+12.41kb) PISD(+0.136kb)     |
| rs6987157  | 8  | 55310290  | 0.0001526 | -0.1894  | 0.0001513 | .                                 |
| rs8143084  | 22 | 32082154  | 0.0001528 | 0.09859  | 0.0001629 | C22orf30(0)                       |
| rs4572109  | 11 | 98463019  | 0.0001532 | 0.04846  | 0.0001385 | .                                 |
| rs16989519 | 22 | 31725416  | 0.0001535 | 0.1037   | 0.0001598 | PATZ1(0)                          |
| rs6570535  | 6  | 143251169 | 0.0001536 | 0.1342   | 0.0001554 | HIVEP2(0)                         |
| rs2018904  | 10 | 27081902  | 0.0001538 | -0.06283 | 0.0001709 | ABI1(0)                           |
| rs12956178 | 18 | 57152987  | 0.0001548 | 0.2143   | 0.0001939 | CCBE1(0)                          |
| rs10892081 | 11 | 98514432  | 0.0001552 | 0.05041  | 0.0001331 | .                                 |
| rs16970062 | 17 | 32896280  | 0.0001557 | -0.06251 | 0.0001571 | TMEM132E(-11.49kb) FLJ44815(-4.8  |
| rs12505324 | 4  | 138284875 | 0.0001558 | -0.05352 | 0.0001502 | .                                 |
| rs12459751 | 19 | 33538783  | 0.0001561 | -0.07862 | 0.0001761 | RHPN2(0)                          |
| rs9359710  | 6  | 87354789  | 0.0001563 | -0.04717 | 0.0001905 | .                                 |
| rs11176584 | 12 | 40821839  | 0.0001568 | -0.06745 | 0.0001379 | .                                 |
| rs13198353 | 6  | 87300435  | 0.0001572 | -0.06402 | 0.0001942 | .                                 |
| rs981181   | 3  | 112353238 | 0.0001572 | -0.06584 | 0.0001823 | CCDC80(0)                         |
| rs7388039  | 8  | 54554299  | 0.0001574 | -0.08646 | 0.0001177 | .                                 |
| rs17233960 | 3  | 112267781 | 0.0001577 | -0.07516 | 0.0001901 | SLC35A5(-13.11kb) ATG3(0)         |
| rs971080   | 1  | 184716560 | 0.000158  | -0.04687 | 0.0002055 | EDEM3(0)                          |
| rs8021626  | 14 | 27299892  | 0.0001581 | 0.05506  | 0.0001376 | .                                 |
| rs4870911  | 8  | 125627290 | 0.0001582 | -0.06285 | 0.0001502 | MTSS1(0)                          |
| rs2690287  | 7  | 95450360  | 0.0001589 | 0.04662  | 0.0001674 | DYNC1I1(0)                        |
| rs10892008 | 11 | 98463419  | 0.0001591 | 0.04833  | 0.0001464 | .                                 |
| rs4143206  | 7  | 84954482  | 0.0001592 | 0.04759  | 0.0001637 | .                                 |

|            |    |           |           |          |           |                                   |
|------------|----|-----------|-----------|----------|-----------|-----------------------------------|
| rs34950876 | 6  | 31247416  | 0.0001596 | 0.04564  | 0.0001979 | HLA-C(+7.561kb)                   |
| rs35438642 | 6  | 31247439  | 0.0001596 | -0.06645 | 0.0001979 | HLA-C(+7.584kb)                   |
| rs610858   | 11 | 94813669  | 0.0001596 | -0.06645 | 0.0001772 | SFRS2B(+9.281kb) ENDOD1(-9.347kb) |
| rs11143594 | 9  | 71357314  | 0.00016   | -0.1631  | 0.0001523 | PIP5K1B(0)                        |
| rs12779919 | 10 | 27069490  | 0.0001601 | -0.06079 | 0.0001812 | ABI1(0)                           |
| rs4937559  | 11 | 130572775 | 0.0001613 | 0.06321  | 0.0001648 | .                                 |
| rs55718314 | 17 | 32886672  | 0.0001621 | -0.06424 | 0.0001744 | FLJ44815(-14.47kb)                |
| rs10485360 | 6  | 87352141  | 0.0001623 | -0.07806 | 0.0001833 | .                                 |
| rs7193810  | 16 | 77998391  | 0.0001623 | -0.06084 | 0.0001592 | KIAA1576(0)                       |
| rs807768   | 4  | 13890624  | 0.0001623 | -0.04704 | 0.0001485 | .                                 |
| rs11614306 | 12 | 40820681  | 0.000163  | -0.0673  | 0.0001431 | .                                 |
| rs16970065 | 17 | 32896577  | 0.0001637 | -0.06215 | 0.0001684 | TMEM132E(-11.19kb) FLJ44815(-4.5  |
| rs12584713 | 13 | 105256303 | 0.0001643 | 0.05563  | 0.0001783 | .                                 |
| rs12456524 | 18 | 39451533  | 0.0001652 | -0.04601 | 0.0002344 | .                                 |
| rs6895765  | 5  | 124253140 | 0.0001658 | -0.07313 | 0.0001409 | .                                 |
| rs11903790 | 2  | 162648576 | 0.0001669 | -0.155   | 0.0001734 | SLC4A10(0)                        |
| rs1508343  | 6  | 87300033  | 0.000167  | -0.06557 | 0.0002026 | .                                 |
| rs34879209 | 1  | 152818081 | 0.0001671 | -0.0751  | 0.0001608 | LCE1A(+17.8kb) LCE6A(+1.622kb)    |
| rs11578693 | 1  | 87715250  | 0.0001672 | 0.04932  | 0.000138  | .                                 |
| rs1939820  | 11 | 105906359 | 0.0001675 | -0.06814 | 0.0001484 | KIAA1826(+13.4kb) KBTBD3(-15.46k  |
| rs10512531 | 17 | 67875017  | 0.0001682 | -0.04972 | 0.000176  | .                                 |
| rs4714677  | 6  | 43327039  | 0.0001682 | -0.06107 | 0.0001769 | ZNF318(0)                         |
| rs7979538  | 12 | 115852376 | 0.0001682 | 0.04535  | 0.000151  | .                                 |
| rs6860432  | 5  | 118536233 | 0.0001683 | -0.06399 | 0.0001695 | DMXL1(0)                          |
| rs35857242 | 6  | 31253121  | 0.0001685 | -0.06642 | 0.0002182 | HLA-C(+13.27kb)                   |
| rs1236924  | 1  | 119205754 | 0.0001686 | 0.08173  | 0.0001266 | .                                 |
| rs1279200  | 14 | 33466548  | 0.0001686 | 0.06441  | 0.0001605 | NPAS3(0)                          |
| rs2126127  | 8  | 140788362 | 0.0001687 | -0.04619 | 0.0002032 | NIBP(0)                           |
| rs11216410 | 11 | 98544433  | 0.0001689 | 0.06485  | 0.0001487 | .                                 |
| rs4876679  | 8  | 117763873 | 0.0001691 | 0.0548   | 0.0001474 | UTP23(-14.87kb) EIF3H(0)          |
| rs4145242  | 8  | 117728296 | 0.0001692 | 0.05455  | 0.0001487 | EIF3H(0)                          |
| rs4876680  | 8  | 117777914 | 0.0001692 | 0.05455  | 0.0001487 | UTP23(-0.827kb) EIF3H(+9.852kb)   |
| rs16970020 | 17 | 32883127  | 0.0001696 | -0.06715 | 0.0001963 | FLJ44815(-18.01kb)                |
| rs12652885 | 5  | 124258259 | 0.0001701 | -0.07301 | 0.0001466 | .                                 |
| rs17233925 | 3  | 112264089 | 0.0001704 | -0.07481 | 0.000205  | SLC35A5(-16.8kb) ATG3(0)          |
| rs7092950  | 10 | 27089886  | 0.0001708 | -0.06061 | 0.0001911 | ABI1(0)                           |
| rs7916104  | 10 | 27093333  | 0.0001708 | -0.06061 | 0.0001911 | ABI1(0)                           |
| rs1681786  | 7  | 140268031 | 0.0001712 | -0.04584 | 0.0002224 | DENND2A(0)                        |
| rs2888404  | 7  | 84981231  | 0.0001718 | 0.0474   | 0.0001742 | .                                 |
| rs6837390  | 4  | 139301464 | 0.0001728 | -0.04967 | 0.000154  | .                                 |
| rs4655941  | 1  | 87720853  | 0.0001733 | 0.0489   | 0.0001531 | .                                 |
| rs58267368 | 16 | 13775249  | 0.0001733 | 0.05858  | 0.0001481 | .                                 |
| rs58527502 | 3  | 170488882 | 0.0001733 | 0.05997  | 0.0001486 | .                                 |
| rs58685113 | 3  | 170488798 | 0.0001733 | 0.05997  | 0.0001486 | .                                 |
| rs6563573  | 13 | 38507982  | 0.0001739 | -0.0676  | 0.0002119 | .                                 |
| rs10892100 | 11 | 98539849  | 0.0001746 | 0.06338  | 0.000159  | .                                 |
| rs4871513  | 8  | 125616148 | 0.0001746 | -0.1411  | 0.0001632 | MTSS1(0)                          |

|            |    |           |           |          |           |                                   |
|------------|----|-----------|-----------|----------|-----------|-----------------------------------|
| rs7004786  | 8  | 55325846  | 0.0001755 | -0.1837  | 0.0001741 | .                                 |
| rs11080283 | 17 | 32886918  | 0.000176  | -0.04891 | 0.0001564 | FLJ44815(-14.22kb)                |
| rs11680840 | 2  | 221158425 | 0.0001764 | -0.05714 | 0.0002096 | .                                 |
| rs9749364  | 19 | 33525713  | 0.0001765 | -0.08334 | 0.0001627 | RHPN2(0)                          |
| rs56090552 | 7  | 28068523  | 0.0001767 | -0.05285 | 0.0001856 | JAZF1(0)                          |
| rs6829715  | 4  | 58393319  | 0.0001767 | -0.05842 | 0.0001657 | .                                 |
| rs7916812  | 10 | 91098008  | 0.0001767 | -0.1861  | 0.000169  | IFIT3(0)                          |
| rs3136408  | 8  | 95447282  | 0.0001773 | 0.1487   | 0.0001542 | RAD54B(0)                         |
| rs3136409  | 8  | 95447262  | 0.0001773 | 0.1487   | 0.0001542 | RAD54B(0)                         |
| rs7144332  | 14 | 27307519  | 0.0001778 | 0.04865  | 0.0001653 | .                                 |
| rs1441018  | 10 | 34447596  | 0.000178  | -0.04614 | 0.0001585 | PARD3(0)                          |
| rs6663178  | 1  | 184661642 | 0.000178  | -0.1603  | 0.0002254 | EDEM3(0)                          |
| rs34147381 | 6  | 87338767  | 0.0001781 | -0.06622 | 0.0002154 | .                                 |
| rs17157266 | 11 | 62199817  | 0.0001782 | -0.05996 | 0.0002171 | SCGB1A1(+9.15kb) AHNAK(-1.198kb)  |
| rs34555146 | 18 | 57186930  | 0.0001788 | 0.1996   | 0.0001956 | CCBE1(0)                          |
| rs7236861  | 18 | 57187845  | 0.0001788 | 0.1996   | 0.0001956 | CCBE1(0)                          |
| rs752492   | 8  | 125615738 | 0.0001793 | -0.06159 | 0.0001764 | MTSS1(0)                          |
| rs62530668 | 8  | 125617875 | 0.0001802 | -0.06053 | 0.0001734 | MTSS1(0)                          |
| rs2732775  | 7  | 84943610  | 0.0001804 | 0.04667  | 0.0001758 | .                                 |
| rs35446580 | 6  | 31250796  | 0.0001806 | -0.06563 | 0.0002202 | HLA-C(+10.94kb)                   |
| rs34461574 | 18 | 57186373  | 0.0001809 | 0.1993   | 0.0001992 | CCBE1(0)                          |
| rs62237845 | 22 | 32027892  | 0.0001809 | 0.1038   | 0.0002033 | SFI1(+13.36kb) PISD(+1.082kb)     |
| rs7922901  | 10 | 123026519 | 0.0001812 | -0.04908 | 0.000163  | .                                 |
| rs7923130  | 10 | 123026502 | 0.0001812 | -0.04908 | 0.000163  | .                                 |
| rs11080282 | 17 | 32886888  | 0.0001825 | -0.06934 | 0.0001611 | FLJ44815(-14.25kb)                |
| rs11814778 | 10 | 87519372  | 0.0001825 | -0.04877 | 0.0002528 | GRID1(0)                          |
| rs12693160 | 2  | 179163450 | 0.0001826 | 0.04674  | 0.0001858 | OSBPL6(0)                         |
| rs9783305  | 11 | 98461460  | 0.0001827 | 0.05347  | 0.0001708 | .                                 |
| rs10914126 | 1  | 180870231 | 0.0001829 | 0.1603   | 0.0001842 | XPR1(+14.75kb) KIAA1614(-12.08kb) |
| rs11895764 | 2  | 58543415  | 0.0001833 | 0.1564   | 0.000166  | .                                 |
| rs9462880  | 6  | 43210110  | 0.0001833 | 0.04637  | 0.000176  | TTBK1(-1.111kb) PARC(+17.79kb) C  |
| rs11998205 | 8  | 91640002  | 0.0001835 | 0.1544   | 0.0001881 | TMEM64(0)                         |
| rs622206   | 11 | 94813481  | 0.0001836 | 0.04503  | 0.0002032 | SFRS2B(+9.093kb) ENDOD1(-9.535kb) |
| rs62439015 | 6  | 87309955  | 0.0001836 | -0.05403 | 0.0001868 | .                                 |
| rs1437593  | 8  | 52252405  | 0.0001837 | 0.05098  | 0.00024   | PXDNL(0)                          |
| rs12623525 | 2  | 139830401 | 0.000184  | -0.06579 | 0.0001963 | .                                 |
| rs12970211 | 18 | 57184702  | 0.0001843 | 0.1991   | 0.000203  | CCBE1(0)                          |
| rs34334875 | 18 | 57185425  | 0.0001843 | 0.1991   | 0.000203  | CCBE1(0)                          |
| rs7230098  | 18 | 57185356  | 0.0001843 | 0.1991   | 0.000203  | CCBE1(0)                          |
| rs11650097 | 17 | 32893002  | 0.0001846 | 0.05171  | 0.0001351 | TMEM132E(-14.77kb) FLJ44815(-8.1  |
| rs521144   | 12 | 24514180  | 0.0001851 | -0.04794 | 0.0001557 | SOX5(0)                           |
| rs6965945  | 7  | 92600509  | 0.0001851 | 0.04695  | 0.0001844 | .                                 |
| rs4688155  | 3  | 63106300  | 0.0001857 | -0.1079  | 0.000172  | .                                 |
| rs17665471 | 8  | 70556602  | 0.0001858 | -0.06517 | 0.0001751 | SULF1(0)                          |
| rs10505287 | 8  | 117727850 | 0.0001863 | 0.09613  | 0.0001765 | EIF3H(0)                          |
| rs5998099  | 22 | 32100857  | 0.0001863 | 0.06871  | 0.0001982 | C22orf30(0)                       |
| rs17662684 | 17 | 32891833  | 0.0001865 | 0.05164  | 0.0001366 | TMEM132E(-15.93kb) FLJ44815(-9.3  |

|            |    |           |           |          |           |                                   |
|------------|----|-----------|-----------|----------|-----------|-----------------------------------|
| rs988199   | 17 | 32883256  | 0.0001867 | -0.0629  | 0.0001866 | FLJ44815(-17.89kb)                |
| rs7817230  | 8  | 95410986  | 0.0001873 | 0.1473   | 0.000166  | RAD54B(0)                         |
| rs12165609 | 22 | 32036332  | 0.0001877 | -0.06034 | 0.0001975 | PISD(+9.522kb)                    |
| rs17669895 | 10 | 27121762  | 0.0001877 | -0.04712 | 0.0002145 | ABI1(0)                           |
| rs1961119  | 14 | 94835959  | 0.0001877 | 0.04889  | 0.0001832 | SERPINA1(-7.124kb)                |
| rs7216837  | 17 | 32890968  | 0.0001877 | 0.09939  | 0.0001422 | TMEM132E(-16.8kb) FLJ44815(-10.1  |
| rs7844947  | 8  | 52181920  | 0.0001877 | 0.05241  | 0.000218  | .                                 |
| rs1378019  | 2  | 221159901 | 0.0001878 | -0.0563  | 0.0002216 | .                                 |
| rs2014895  | 8  | 125615137 | 0.0001888 | -0.0619  | 0.0001812 | MTSS1(0)                          |
| rs3843608  | 11 | 98512351  | 0.0001899 | 0.05196  | 0.0001598 | .                                 |
| rs55931230 | 22 | 32028028  | 0.0001899 | 0.1025   | 0.000205  | SFI1(+13.49kb) PISD(+1.218kb)     |
| rs62239379 | 22 | 31711191  | 0.0001899 | 0.1025   | 0.0001983 | PATZ1(-10.6kb)                    |
| rs878654   | 22 | 31716191  | 0.0001899 | 0.1093   | 0.0001983 | PATZ1(-5.598kb)                   |
| rs11735670 | 4  | 58355701  | 0.0001901 | 0.05967  | 0.0002027 | .                                 |
| rs17199394 | 16 | 13773714  | 0.0001901 | -0.04583 | 0.0001751 | .                                 |
| rs2334940  | 18 | 39454592  | 0.0001901 | -0.05514 | 0.0002697 | .                                 |
| rs60160953 | 17 | 32892117  | 0.0001903 | 0.04798  | 0.0001535 | TMEM132E(-15.65kb) FLJ44815(-9.0  |
| rs6953868  | 7  | 92636870  | 0.0001905 | 0.04906  | 0.0001982 | .                                 |
| rs1025440  | 18 | 39450864  | 0.0001906 | -0.04541 | 0.0002735 | .                                 |
| rs1025441  | 18 | 39450736  | 0.0001906 | -0.04541 | 0.0002735 | .                                 |
| rs4781532  | 16 | 13782260  | 0.0001913 | 0.05816  | 0.0001654 | .                                 |
| rs2274878  | 10 | 91102098  | 0.0001915 | -0.0538  | 0.0001679 | IFIT3(+1.782kb)                   |
| rs1900583  | 3  | 63102307  | 0.0001918 | -0.1077  | 0.0001779 | .                                 |
| rs1900584  | 3  | 63102324  | 0.0001918 | -0.1077  | 0.0001779 | .                                 |
| rs7647858  | 3  | 63102990  | 0.0001918 | -0.1077  | 0.0001779 | .                                 |
| rs9519405  | 13 | 105255696 | 0.000192  | 0.05531  | 0.0002011 | .                                 |
| rs4645587  | 8  | 117651760 | 0.0001924 | 0.07067  | 0.0001773 | EIF3H(-5.294kb)                   |
| rs530660   | 7  | 140264267 | 0.0001925 | -0.04555 | 0.000266  | DENND2A(0)                        |
| rs9288956  | 3  | 112352718 | 0.0001927 | -0.06324 | 0.0002152 | CCDC80(0)                         |
| rs2159796  | 7  | 140266111 | 0.000193  | -0.04542 | 0.0002524 | DENND2A(0)                        |
| rs594215   | 7  | 140266539 | 0.000193  | -0.04542 | 0.0002524 | DENND2A(0)                        |
| rs1441064  | 4  | 58356843  | 0.0001934 | -0.05523 | 0.0001986 | .                                 |
| rs34134035 | 16 | 77978246  | 0.0001938 | -0.06505 | 0.0002274 | KIAA1576(0)                       |
| rs17145884 | 11 | 62200176  | 0.0001944 | -0.05947 | 0.0002361 | SCGB1A1(+9.509kb) AHNAK(-0.839kb) |
| rs10086419 | 8  | 117744771 | 0.0001946 | 0.06848  | 0.0001848 | EIF3H(0)                          |
| rs10093551 | 8  | 117712821 | 0.0001946 | 0.06848  | 0.0001848 | EIF3H(0)                          |
| rs10112279 | 8  | 117716963 | 0.0001946 | 0.06848  | 0.0001848 | EIF3H(0)                          |
| rs10112604 | 8  | 117756518 | 0.0001946 | 0.06848  | 0.0001848 | EIF3H(0)                          |
| rs4278180  | 8  | 117726681 | 0.0001946 | 0.06848  | 0.0001848 | EIF3H(0)                          |
| rs55951040 | 8  | 117755735 | 0.0001946 | 0.06848  | 0.0001848 | EIF3H(0)                          |
| rs6988841  | 8  | 117730893 | 0.0001946 | 0.06848  | 0.0001848 | EIF3H(0)                          |
| rs16884938 | 8  | 114649088 | 0.0001949 | -0.04626 | 0.0002014 | .                                 |
| rs681892   | 7  | 140270270 | 0.0001949 | 0.1832   | 0.0002554 | DENND2A(0)                        |
| rs12600961 | 17 | 32895456  | 0.0001952 | -0.06693 | 0.0002224 | TMEM132E(-12.31kb) FLJ44815(-5.6  |
| rs2203809  | 2  | 141920136 | 0.0001957 | -0.05016 | 0.0001789 | LRP1B(0)                          |
| rs3910079  | 11 | 98546750  | 0.0001958 | 0.06592  | 0.0001871 | .                                 |
| rs3910080  | 11 | 98546762  | 0.0001958 | 0.06592  | 0.0001871 | .                                 |

|            |    |           |           |          |           |                                  |
|------------|----|-----------|-----------|----------|-----------|----------------------------------|
| rs56191323 | 17 | 67870936  | 0.000196  | -0.06025 | 0.0002051 | .                                |
| rs2028429  | 8  | 95487517  | 0.0001965 | 0.05097  | 0.0001717 | RAD54B(+0.207kb) KIAA1429(-13.08 |
| rs6995702  | 8  | 52163607  | 0.0001965 | 0.1557   | 0.0002311 | .                                |
| rs2690286  | 7  | 95451795  | 0.0001968 | 0.04605  | 0.0002062 | DYNC111(0)                       |
| rs56356218 | 9  | 89978032  | 0.0001969 | -0.073   | 0.0002087 | .                                |
| rs3751691  | 16 | 89628381  | 0.0001971 | -0.06182 | 0.0002047 | SPG7(+4.207kb) RPL13(0) CPNE7(-1 |
| rs685182   | 7  | 140265434 | 0.0001971 | -0.04568 | 0.0002674 | DENND2A(0)                       |
| rs35991160 | 18 | 57142982  | 0.0001972 | 0.2023   | 0.0002425 | CCBE1(0)                         |
| rs5998095  | 22 | 32093181  | 0.0001976 | 0.04863  | 0.0002126 | C22orf30(0)                      |
| rs9893375  | 17 | 71514573  | 0.0001976 | 0.09602  | 0.0002369 | .                                |
| rs2172545  | 17 | 71060835  | 0.0001981 | -0.12    | 0.0002091 | SLC39A11(0)                      |
| rs57386711 | 17 | 71061200  | 0.0001981 | -0.12    | 0.0002091 | SLC39A11(0)                      |
| rs57861487 | 17 | 71060953  | 0.0001981 | -0.12    | 0.0002091 | SLC39A11(0)                      |
| rs4721107  | 7  | 12535105  | 0.0001982 | -0.0696  | 0.0002156 | .                                |
| rs4669127  | 2  | 7160439   | 0.0001987 | -0.05278 | 0.0002417 | RNF144A(0)                       |
| rs56155927 | 2  | 7159401   | 0.0001994 | -0.05277 | 0.0002448 | RNF144A(0)                       |
| rs1026010  | 5  | 124256262 | 0.0001997 | 0.04834  | 0.0001677 | .                                |
| rs11579872 | 1  | 87717809  | 0.0001997 | 0.04834  | 0.0001641 | .                                |
| rs11583727 | 1  | 87717635  | 0.0001997 | -0.07243 | 0.0001641 | .                                |
| rs9369408  | 6  | 43332186  | 0.0002    | 0.04534  | 0.0002146 | ZNF318(0)                        |
| rs2031472  | 1  | 80303275  | 0.0002001 | 0.1316   | 0.0002042 | .                                |
| rs2109925  | 7  | 140265738 | 0.0002003 | 0.104    | 0.0002603 | DENND2A(0)                       |
| rs62182829 | 2  | 149064262 | 0.0002003 | -0.04534 | 0.000226  | .                                |
| rs6980504  | 8  | 117680269 | 0.0002004 | 0.06882  | 0.0001828 | EIF3H(0)                         |
| rs10886882 | 10 | 123027033 | 0.0002005 | -0.04874 | 0.0001807 | .                                |
| rs768860   | 12 | 115851419 | 0.0002005 | -0.05278 | 0.0001805 | .                                |
| rs6898265  | 5  | 124255135 | 0.0002006 | -0.07228 | 0.0001706 | .                                |
| rs2690284  | 7  | 95453531  | 0.0002011 | -0.06239 | 0.000213  | DYNC111(0)                       |
| rs28749549 | 6  | 31157830  | 0.0002011 | 0.04603  | 0.0002291 | POU5F1(+19.38kb) HCG27(-7.768kb) |
| rs10160193 | 10 | 77404582  | 0.0002013 | 0.2247   | 0.0002404 | .                                |
| rs2279249  | 4  | 5812425   | 0.0002013 | -0.06244 | 0.000187  | EVC(0) CRMP1(-10.06kb)           |
| rs62239182 | 22 | 32065982  | 0.0002018 | 0.1173   | 0.0002173 | C22orf30(-6.259kb)               |
| rs10493797 | 1  | 87720928  | 0.0002019 | 0.0482   | 0.0001666 | .                                |
| rs10850509 | 12 | 115852977 | 0.0002019 | 0.0482   | 0.0001754 | .                                |
| rs11579563 | 1  | 87721876  | 0.0002019 | -0.04997 | 0.0001666 | .                                |
| rs1955220  | 7  | 95425041  | 0.0002019 | -0.04667 | 0.0001857 | DYNC111(0)                       |
| rs12654479 | 5  | 124243030 | 0.0002021 | -0.07288 | 0.0001871 | .                                |
| rs1021360  | 10 | 106649661 | 0.0002022 | -0.08499 | 0.0002231 | SORCS3(0)                        |
| rs11958289 | 5  | 124281676 | 0.0002022 | -0.07219 | 0.0001754 | .                                |
| rs12505604 | 4  | 37720580  | 0.0002028 | -0.0453  | 0.0002474 | .                                |
| rs7822636  | 8  | 66471234  | 0.0002031 | -0.06746 | 0.0001639 | .                                |
| rs9661314  | 1  | 184667608 | 0.0002034 | -0.04571 | 0.000247  | EDEM3(0)                         |
| rs16890285 | 8  | 40950273  | 0.0002038 | -0.1952  | 0.000313  | .                                |
| rs11951671 | 5  | 124288075 | 0.0002039 | -0.07273 | 0.0001761 | .                                |
| rs12031748 | 1  | 87731112  | 0.0002042 | 0.04861  | 0.0001686 | .                                |
| rs1929133  | 1  | 87730920  | 0.0002042 | 0.04861  | 0.0001686 | .                                |
| rs11493892 | 11 | 98548543  | 0.0002044 | 0.06771  | 0.0001905 | .                                |

|            |    |           |           |          |           |                                  |
|------------|----|-----------|-----------|----------|-----------|----------------------------------|
| rs6473596  | 8  | 52251267  | 0.0002047 | 0.05073  | 0.0002623 | PXDNL(0)                         |
| rs930189   | 18 | 39451865  | 0.0002062 | 0.06172  | 0.0003021 | .                                |
| rs9900469  | 17 | 9575564   | 0.0002062 | -0.04498 | 0.0001811 | USP43(0)                         |
| rs7842285  | 8  | 52184257  | 0.0002064 | 0.0512   | 0.0002503 | .                                |
| rs11241779 | 5  | 124282754 | 0.0002066 | -0.07203 | 0.0001809 | .                                |
| rs12942229 | 17 | 32891684  | 0.0002073 | 0.04766  | 0.0001664 | TMEM132E(-16.08kb) FLJ44815(-9.4 |
| rs623770   | 11 | 94819268  | 0.0002076 | 0.04596  | 0.0002147 | SFRS2B(+14.88kb) ENDOD1(-3.748kb |
| rs10886884 | 10 | 123030375 | 0.0002077 | -0.04865 | 0.0001834 | .                                |
| rs4514216  | 1  | 87720315  | 0.000208  | 0.04839  | 0.0001744 | .                                |
| rs10924511 | 1  | 246288650 | 0.0002095 | 0.1805   | 0.0002277 | SMYD3(0)                         |
| rs7521795  | 1  | 246288506 | 0.0002095 | 0.1805   | 0.0002277 | SMYD3(0)                         |
| rs131235   | 22 | 32120028  | 0.0002099 | 0.09508  | 0.0002273 | C22orf30(+11.3kb)                |
| rs10505282 | 8  | 117676559 | 0.0002101 | 0.0692   | 0.000194  | EIF3H(0)                         |
| rs1279204  | 14 | 33462453  | 0.0002108 | 0.06081  | 0.0001951 | NPAS3(0)                         |
| rs55745425 | 7  | 86702047  | 0.0002108 | -0.2025  | 0.0002001 | .                                |
| rs2243635  | 21 | 37339889  | 0.0002109 | 0.04618  | 0.0001697 | .                                |
| rs1447448  | 3  | 63102500  | 0.0002113 | -0.1066  | 0.0002003 | .                                |
| rs3828783  | 6  | 33767727  | 0.0002114 | -0.05865 | 0.0002201 | MLN(0) LEMD2(+10.83kb)           |
| rs10911633 | 1  | 184667270 | 0.0002116 | -0.04642 | 0.0002765 | EDEM3(0)                         |
| rs12184284 | 1  | 184666384 | 0.0002116 | -0.04642 | 0.0002765 | EDEM3(0)                         |
| rs7663170  | 4  | 144994903 | 0.0002119 | 0.2021   | 0.0002522 | .                                |
| rs243865   | 16 | 55511806  | 0.000212  | 0.05468  | 0.000241  | MMP2(-1.274kb)                   |
| rs2618976  | 7  | 95453635  | 0.0002123 | 0.04599  | 0.000224  | DYNC111(0)                       |
| rs10911636 | 1  | 184669803 | 0.0002125 | -0.04626 | 0.0002832 | EDEM3(0)                         |
| rs1864155  | 16 | 89616232  | 0.0002125 | -0.06083 | 0.0002305 | SPG7(0) RPL13(-10.86kb)          |
| rs12022412 | 1  | 246285582 | 0.0002126 | 0.1804   | 0.0002313 | SMYD3(0)                         |
| rs12026451 | 1  | 246285804 | 0.0002126 | 0.1804   | 0.0002313 | SMYD3(0)                         |
| rs12032834 | 1  | 246285491 | 0.0002126 | 0.1804   | 0.0002313 | SMYD3(0)                         |
| rs2095755  | 1  | 246287154 | 0.0002126 | 0.1804   | 0.0002313 | SMYD3(0)                         |
| rs4022382  | 1  | 246287020 | 0.0002126 | 0.1804   | 0.0002313 | SMYD3(0)                         |
| rs4655939  | 1  | 87713999  | 0.0002126 | 0.1804   | 0.0001711 | .                                |
| rs56800259 | 1  | 246288082 | 0.0002126 | 0.1804   | 0.0002313 | SMYD3(0)                         |
| rs6659941  | 1  | 246286472 | 0.0002126 | 0.1804   | 0.0002313 | SMYD3(0)                         |
| rs6694030  | 1  | 246286356 | 0.0002126 | 0.1804   | 0.0002313 | SMYD3(0)                         |
| rs6694125  | 1  | 246286449 | 0.0002126 | 0.04828  | 0.0002313 | SMYD3(0)                         |
| rs2109926  | 7  | 140265864 | 0.0002133 | -0.04537 | 0.0002732 | DENND2A(0)                       |
| rs626514   | 11 | 94819090  | 0.0002141 | 0.0455   | 0.0002348 | SFRS2B(+14.7kb) ENDOD1(-3.926kb) |
| rs1538406  | 6  | 87338331  | 0.0002144 | -0.06522 | 0.0002705 | .                                |
| rs28360055 | 6  | 31155304  | 0.0002148 | -0.06008 | 0.0002327 | POU5F1(+16.85kb) HCG27(-10.29kb) |
| rs10790171 | 11 | 98499049  | 0.0002149 | 0.0492   | 0.0001911 | .                                |
| rs740227   | 22 | 32115969  | 0.0002152 | 0.09468  | 0.0002319 | C22orf30(+7.238kb)               |
| rs34518327 | 4  | 138248316 | 0.0002162 | -0.05153 | 0.0002148 | .                                |
| rs4655938  | 1  | 87713948  | 0.0002163 | 0.04816  | 0.000176  | .                                |
| rs4655940  | 1  | 87714096  | 0.0002163 | 0.04816  | 0.000176  | .                                |
| rs58807374 | 1  | 87712920  | 0.0002163 | 0.04816  | 0.000176  | .                                |
| rs59017401 | 1  | 87712982  | 0.0002163 | 0.04816  | 0.000176  | .                                |
| rs61215335 | 1  | 87713875  | 0.0002163 | 0.04816  | 0.000176  | .                                |



|            |    |           |           |          |           |                                  |
|------------|----|-----------|-----------|----------|-----------|----------------------------------|
| rs13252069 | 8  | 51556084  | 0.0002164 | -0.06033 | 0.0002108 | SNTG1(0)                         |
| rs13252090 | 8  | 51556107  | 0.0002164 | 0.07143  | 0.0002108 | SNTG1(0)                         |
| rs13262678 | 8  | 51556065  | 0.0002164 | 0.07143  | 0.0002108 | SNTG1(0)                         |
| rs9905614  | 17 | 67886023  | 0.0002164 | 0.07143  | 0.0002243 | .                                |
| rs13131236 | 4  | 138246911 | 0.0002165 | -0.05155 | 0.0002184 | .                                |
| rs4387293  | 10 | 123028121 | 0.0002166 | -0.04842 | 0.0001933 | .                                |
| rs1999273  | 1  | 87715860  | 0.0002173 | 0.04808  | 0.0001786 | .                                |
| rs11906542 | 20 | 24382682  | 0.0002177 | -0.1873  | 0.0002106 | .                                |
| rs11907112 | 20 | 24383760  | 0.0002177 | -0.1873  | 0.0002106 | .                                |
| rs11907557 | 20 | 24384030  | 0.0002177 | -0.1873  | 0.0002106 | .                                |
| rs2206647  | 20 | 24382102  | 0.0002177 | -0.1873  | 0.0002106 | .                                |
| rs2206648  | 20 | 24382313  | 0.0002177 | -0.1873  | 0.0002106 | .                                |
| rs6114688  | 20 | 24382588  | 0.0002177 | -0.1873  | 0.0002106 | .                                |
| rs6114691  | 20 | 24384868  | 0.0002177 | -0.1873  | 0.0002106 | .                                |
| rs28360056 | 6  | 31155434  | 0.0002179 | -0.06126 | 0.0002314 | POU5F1(+16.98kb) HCG27(-10.16kb) |
| rs4713442  | 6  | 31155405  | 0.0002179 | -0.06126 | 0.0002314 | POU5F1(+16.95kb) HCG27(-10.19kb) |
| rs10265865 | 7  | 84971857  | 0.000218  | 0.04658  | 0.000228  | .                                |
| rs11576880 | 1  | 87715097  | 0.000219  | 0.04809  | 0.0001788 | .                                |
| rs35905748 | 8  | 117755248 | 0.0002191 | 0.04555  | 0.0002039 | EIF3H(0)                         |
| rs681695   | 11 | 94802776  | 0.0002191 | 0.06811  | 0.0002245 | SFRS2B(0)                        |
| rs28534083 | 8  | 52222309  | 0.0002194 | 0.05298  | 0.0002468 | PXDNL(-9.827kb)                  |
| rs2690295  | 7  | 95443892  | 0.0002202 | -0.04519 | 0.0002259 | DYNC1I1(0)                       |
| rs1799038  | 7  | 95467271  | 0.0002206 | 0.04652  | 0.0002089 | DYNC1I1(0)                       |
| rs3136403  | 8  | 95450251  | 0.0002208 | 0.1456   | 0.0001962 | RAD54B(0)                        |
| rs11152152 | 18 | 57147728  | 0.0002215 | 0.2034   | 0.0002658 | CCBE1(0)                         |
| rs2024764  | 1  | 184653521 | 0.0002217 | -0.04463 | 0.0002821 | EDEM3(-6.103kb)                  |
| rs17611095 | 2  | 221184993 | 0.0002222 | -0.05612 | 0.0002669 | .                                |
| rs1869571  | 2  | 221185720 | 0.0002222 | -0.05612 | 0.0002669 | .                                |
| rs7210327  | 17 | 67867117  | 0.0002231 | -0.0598  | 0.0002296 | .                                |
| rs7210063  | 17 | 67876126  | 0.0002233 | -0.0598  | 0.0002324 | .                                |
| rs7211330  | 17 | 67876146  | 0.0002233 | -0.0598  | 0.0002324 | .                                |
| rs5994424  | 22 | 32106004  | 0.0002236 | 0.09471  | 0.0002399 | C22orf30(0)                      |
| rs2618972  | 7  | 95432388  | 0.000224  | -0.04523 | 0.0002101 | DYNC1I1(0)                       |
| rs11775038 | 8  | 756859    | 0.0002245 | 0.05813  | 0.0002405 | .                                |
| rs11216350 | 11 | 98526687  | 0.000225  | 0.06242  | 0.0002025 | .                                |
| rs17385455 | 7  | 78351701  | 0.0002255 | 0.05905  | 0.000236  | MAGI2(0)                         |
| rs61792523 | 3  | 170486987 | 0.0002255 | -0.0814  | 0.0001912 | .                                |
| rs10762857 | 10 | 54411308  | 0.0002257 | -0.04767 | 0.0002221 | .                                |
| rs2334939  | 18 | 39454582  | 0.0002262 | -0.04523 | 0.0003228 | .                                |
| rs2878292  | 18 | 39454647  | 0.0002262 | -0.04523 | 0.0003228 | .                                |
| rs6813726  | 4  | 6032801   | 0.0002263 | -0.07351 | 0.0002498 | JAKMIP1(0)                       |
| rs11216407 | 11 | 98544189  | 0.0002266 | 0.06368  | 0.0002025 | .                                |
| rs59979289 | 8  | 55347797  | 0.0002269 | -0.1816  | 0.0002072 | .                                |
| rs61262057 | 8  | 55347654  | 0.0002269 | -0.1816  | 0.0002072 | .                                |
| rs131228   | 22 | 32115650  | 0.0002274 | 0.09435  | 0.0002439 | C22orf30(+6.919kb)               |
| rs81946    | 22 | 32115569  | 0.0002274 | 0.09435  | 0.0002439 | C22orf30(+6.838kb)               |
| rs861578   | 1  | 184729032 | 0.0002285 | 0.0459   | 0.0002568 | EDEM3(+4.991kb)                  |

|            |    |           |           |          |           |                                   |
|------------|----|-----------|-----------|----------|-----------|-----------------------------------|
| rs5998093  | 22 | 32092981  | 0.0002286 | 0.09578  | 0.000243  | C22orf30(0)                       |
| rs7246984  | 19 | 33568670  | 0.0002287 | -0.08089 | 0.000281  | RHPN2(+12.88kb) GPATCH1(-3.115kb) |
| rs3733185  | 4  | 5811441   | 0.0002288 | -0.06235 | 0.0002168 | EVC(0) CRMP1(-11.05kb)            |
| rs56986847 | 8  | 5672549   | 0.0002288 | 0.07028  | 0.000242  | .                                 |
| rs1158778  | 15 | 78977330  | 0.0002292 | 0.04506  | 0.0002294 | .                                 |
| rs61142483 | 15 | 78978318  | 0.0002292 | 0.2038   | 0.0002294 | .                                 |
| rs620767   | 11 | 94807261  | 0.0002292 | 0.2038   | 0.0002413 | SFRS2B(+2.873kb) ENDOD1(-15.76kb) |
| rs2104142  | 6  | 43209739  | 0.0002297 | 0.1825   | 0.0002203 | TTBK1(-1.482kb) PARC(+17.41kb) C  |
| rs28526116 | 17 | 33841977  | 0.0002297 | 0.04562  | 0.0002444 | .                                 |
| rs12232581 | 18 | 57162931  | 0.0002299 | 0.1889   | 0.0002711 | CCBE1(0)                          |
| rs12232583 | 18 | 57163036  | 0.0002299 | 0.1889   | 0.0002711 | CCBE1(0)                          |
| rs12232758 | 18 | 57163217  | 0.0002299 | 0.1889   | 0.0002711 | CCBE1(0)                          |
| rs12957165 | 18 | 57162138  | 0.0002299 | 0.1889   | 0.0002711 | CCBE1(0)                          |
| rs12965354 | 18 | 57162181  | 0.0002299 | 0.1889   | 0.0002711 | CCBE1(0)                          |
| rs60498756 | 8  | 40976389  | 0.0002303 | -0.2038  | 0.0003508 | .                                 |
| rs11878228 | 19 | 33567184  | 0.0002304 | -0.08094 | 0.0002797 | RHPN2(+11.39kb) GPATCH1(-4.601kb) |
| rs6941912  | 6  | 31161571  | 0.0002307 | -0.05965 | 0.0002487 | HCG27(-4.027kb)                   |
| rs1083138  | 4  | 70878833  | 0.0002325 | -0.05054 | 0.0002609 | STATH(+10.66kb) HTN3(-15.34kb)    |
| rs28397284 | 6  | 31166936  | 0.0002325 | -0.0617  | 0.0002693 | HCG27(0)                          |
| rs6759945  | 2  | 221154972 | 0.0002328 | -0.05563 | 0.0002677 | .                                 |
| rs12640288 | 4  | 138247343 | 0.000233  | -0.05125 | 0.000232  | .                                 |
| rs3733189  | 4  | 5815635   | 0.0002331 | -0.06103 | 0.0002285 | EVC(0) CRMP1(-6.855kb)            |
| rs11736036 | 4  | 138273594 | 0.0002334 | -0.05227 | 0.0002285 | .                                 |
| rs4713441  | 6  | 31155284  | 0.0002334 | -0.05971 | 0.000254  | POU5F1(+16.83kb) HCG27(-10.31kb)  |
| rs11818659 | 10 | 87247925  | 0.0002337 | -0.0513  | 0.0002525 | .                                 |
| rs1378023  | 2  | 221160610 | 0.0002339 | -0.05563 | 0.0002698 | .                                 |
| rs9787954  | 11 | 129273777 | 0.0002342 | 0.1023   | 0.0002471 | BARX2(0)                          |
| rs4511408  | 13 | 69100580  | 0.0002343 | -0.05915 | 0.000228  | .                                 |
| rs766690   | 7  | 140260788 | 0.0002349 | -0.04485 | 0.0003189 | DENND2A(0)                        |
| rs7094958  | 10 | 123029418 | 0.0002355 | -0.04862 | 0.0002151 | .                                 |
| rs12105906 | 2  | 58550115  | 0.0002362 | 0.1526   | 0.0002144 | .                                 |
| rs1079467  | 11 | 7969711   | 0.0002364 | 0.05911  | 0.0002603 | OR10A6(+19.5kb) OR10A3(+8.644kb)  |
| rs2696166  | 7  | 84935694  | 0.0002368 | -0.05956 | 0.0002257 | .                                 |
| rs9391712  | 6  | 31166719  | 0.0002368 | 0.04579  | 0.0002564 | HCG27(0)                          |
| rs12160120 | 22 | 32104168  | 0.0002369 | 0.09409  | 0.0002539 | C22orf30(0)                       |
| rs131222   | 22 | 32106702  | 0.0002369 | 0.09409  | 0.0002539 | C22orf30(0)                       |
| rs131224   | 22 | 32108824  | 0.0002369 | 0.09409  | 0.0002539 | C22orf30(+0.093kb)                |
| rs140079   | 22 | 32110943  | 0.0002369 | 0.09409  | 0.0002539 | C22orf30(+2.212kb)                |
| rs5998103  | 22 | 32105841  | 0.0002369 | 0.09409  | 0.0002539 | C22orf30(0)                       |
| rs62240687 | 22 | 32104464  | 0.0002369 | 0.09409  | 0.0002539 | C22orf30(0)                       |
| rs11961983 | 6  | 31168483  | 0.0002381 | -0.06173 | 0.0002709 | HCG27(0)                          |
| rs34244210 | 18 | 57174603  | 0.0002387 | 0.1884   | 0.000278  | CCBE1(0)                          |
| rs2409737  | 21 | 37340475  | 0.0002397 | 0.04598  | 0.0001831 | .                                 |
| rs11216429 | 11 | 98547322  | 0.0002399 | 0.06266  | 0.0002134 | .                                 |
| rs4310552  | 10 | 123028198 | 0.0002403 | -0.04887 | 0.0002206 | .                                 |
| rs12549587 | 8  | 140804310 | 0.0002406 | -0.04522 | 0.0003073 | NIBP(0)                           |
| rs11827063 | 11 | 129271297 | 0.0002417 | 0.1034   | 0.0002472 | BARX2(0)                          |

|            |    |           |           |          |           |                                   |
|------------|----|-----------|-----------|----------|-----------|-----------------------------------|
| rs980076   | 3  | 63095078  | 0.0002418 | -0.106   | 0.0002348 | .                                 |
| rs17885436 | 6  | 31237002  | 0.0002419 | -0.06395 | 0.0002835 | HLA-C(0)                          |
| rs488948   | 9  | 138544017 | 0.000242  | 0.04511  | 0.0002508 | LCN9(-11.15kb) GLT6D1(+12.63kb)   |
| rs11199867 | 10 | 123027404 | 0.0002421 | -0.0481  | 0.0002175 | .                                 |
| rs1574430  | 6  | 43269029  | 0.0002423 | 0.044    | 0.0002645 | TTBK1(+13.03kb) SLC22A7(0) CRIP3  |
| rs12030173 | 1  | 103176592 | 0.0002425 | 0.09549  | 0.0001807 | .                                 |
| rs10804288 | 2  | 221156028 | 0.0002428 | -0.05544 | 0.0002798 | .                                 |
| rs10932850 | 2  | 221155976 | 0.0002428 | -0.05544 | 0.0002798 | .                                 |
| rs10932851 | 2  | 221156254 | 0.0002428 | -0.05544 | 0.0002798 | .                                 |
| rs623925   | 11 | 94813092  | 0.0002429 | 0.04471  | 0.0002775 | SFRS2B(+8.704kb) ENDOD1(-9.924kb) |
| rs12774231 | 10 | 27056653  | 0.000245  | -0.0734  | 0.0002778 | ABI1(0)                           |
| rs12780703 | 10 | 27056112  | 0.000245  | -0.05854 | 0.0002778 | ABI1(0)                           |
| rs9428103  | 1  | 118853652 | 0.000245  | -0.05854 | 0.0001957 | .                                 |
| rs12541565 | 8  | 140794689 | 0.0002457 | 0.04473  | 0.0003055 | NIBP(0)                           |
| rs12599960 | 16 | 13786892  | 0.0002461 | 0.05703  | 0.0002133 | .                                 |
| rs34414057 | 16 | 89629070  | 0.0002461 | -0.0635  | 0.0002481 | SPG7(+4.896kb) RPL13(0) CPNE7(-1  |
| rs11967761 | 6  | 87331207  | 0.0002462 | -0.0448  | 0.0003022 | .                                 |
| rs11970342 | 6  | 87331110  | 0.0002462 | -0.0448  | 0.0003022 | .                                 |
| rs6507447  | 18 | 39449655  | 0.0002462 | -0.0448  | 0.0003478 | .                                 |
| rs6507448  | 18 | 39449659  | 0.0002462 | -0.06445 | 0.0003478 | .                                 |
| rs6507449  | 18 | 39449759  | 0.0002462 | -0.06445 | 0.0003478 | .                                 |
| rs2182294  | 10 | 27119069  | 0.0002466 | -0.05922 | 0.0002726 | ABI1(0)                           |
| rs1740724  | 10 | 34207868  | 0.0002467 | -0.1026  | 0.0003437 | .                                 |
| rs6541311  | 1  | 230424130 | 0.0002468 | -0.06856 | 0.000315  | GALNT2(+6.184kb)                  |
| rs9298443  | 8  | 52228456  | 0.0002473 | 0.05068  | 0.0003005 | PXDNL(-3.68kb)                    |
| rs11820950 | 11 | 129272951 | 0.0002474 | 0.1023   | 0.0002571 | BARX2(0)                          |
| rs4144711  | 12 | 114055930 | 0.0002483 | -0.04623 | 0.0002353 | .                                 |
| rs16974485 | 17 | 67875163  | 0.0002486 | -0.06051 | 0.0002458 | .                                 |
| rs2125738  | 6  | 43327750  | 0.0002487 | 0.04406  | 0.0002641 | ZNF318(0)                         |
| rs11576898 | 1  | 87715209  | 0.0002491 | 0.04807  | 0.0001951 | .                                 |
| rs57214808 | 11 | 134679617 | 0.0002497 | -0.06277 | 0.0002231 | .                                 |
| rs11807363 | 1  | 115091087 | 0.0002518 | -0.07196 | 0.0002258 | BCAS2(-19.09kb)                   |
| rs5753573  | 22 | 31754617  | 0.0002519 | 0.09669  | 0.0002575 | PATZ1(+12.37kb)                   |
| rs3219303  | 19 | 50890327  | 0.000252  | -0.08412 | 0.0002926 | POLD1(0) NR1H2(+4.06kb)           |
| rs10070612 | 5  | 124246533 | 0.0002521 | -0.07179 | 0.0002171 | .                                 |
| rs12654486 | 5  | 124243078 | 0.0002521 | -0.07179 | 0.0002171 | .                                 |
| rs12655869 | 5  | 124246999 | 0.0002521 | -0.07179 | 0.0002171 | .                                 |
| rs12658154 | 5  | 124242807 | 0.0002521 | -0.07179 | 0.0002171 | .                                 |
| rs4870912  | 8  | 125627422 | 0.0002524 | -0.0608  | 0.0002403 | MTSS1(0)                          |
| rs16958562 | 17 | 9569435   | 0.0002525 | 0.06029  | 0.0002084 | USP43(0)                          |
| rs1808600  | 8  | 125616409 | 0.0002528 | -0.0601  | 0.0002401 | MTSS1(0)                          |
| rs9861847  | 3  | 57157156  | 0.0002529 | -0.05922 | 0.0002594 | IL17RD(0)                         |
| rs3019125  | 11 | 130535868 | 0.0002537 | 0.06136  | 0.0002494 | .                                 |
| rs11072788 | 15 | 78976326  | 0.0002539 | 0.2075   | 0.0002617 | .                                 |
| rs12654010 | 5  | 124242766 | 0.0002541 | 0.06138  | 0.0002175 | .                                 |
| rs4245091  | 11 | 130572818 | 0.0002541 | -0.0718  | 0.0002615 | .                                 |
| rs28360063 | 6  | 31160298  | 0.0002548 | -0.05925 | 0.0002753 | HCG27(-5.3kb)                     |

|            |    |           |           |          |           |                                  |
|------------|----|-----------|-----------|----------|-----------|----------------------------------|
| rs2706880  | 7  | 95446706  | 0.0002551 | 0.04522  | 0.0002594 | DYNC111(0)                       |
| rs2328515  | 6  | 144071630 | 0.0002552 | -0.07266 | 0.0002773 | PHACTR2(0)                       |
| rs7573045  | 2  | 221182823 | 0.0002558 | -0.05575 | 0.0003113 | .                                |
| rs12252606 | 10 | 132868278 | 0.0002559 | -0.1451  | 0.0002534 | .                                |
| rs12777250 | 10 | 132868365 | 0.0002559 | -0.1451  | 0.0002534 | .                                |
| rs10892111 | 11 | 98542922  | 0.0002563 | 0.0616   | 0.0002279 | .                                |
| rs11216412 | 11 | 98544647  | 0.0002563 | 0.0616   | 0.0002279 | .                                |
| rs4091084  | 11 | 98546825  | 0.0002563 | 0.0616   | 0.0002279 | .                                |
| rs7944933  | 11 | 98540929  | 0.0002563 | 0.0616   | 0.0002279 | .                                |
| rs35734933 | 6  | 31257247  | 0.0002568 | -0.06406 | 0.0003274 | HLA-C(+17.39kb)                  |
| rs34280986 | 18 | 57158975  | 0.000257  | 0.1833   | 0.0003085 | CCBE1(0)                         |
| rs7842503  | 8  | 52199355  | 0.0002571 | -0.1475  | 0.0002914 | .                                |
| rs7914711  | 10 | 20819013  | 0.0002571 | 0.05137  | 0.0002461 | .                                |
| rs7930984  | 11 | 98541621  | 0.0002575 | 0.06149  | 0.0002369 | .                                |
| rs10110193 | 8  | 52226750  | 0.0002579 | 0.05252  | 0.0003059 | PXDNL(-5.386kb)                  |
| rs28449829 | 8  | 52228072  | 0.0002579 | 0.05252  | 0.0003059 | PXDNL(-4.064kb)                  |
| rs10015245 | 4  | 58383750  | 0.0002585 | -0.05784 | 0.0002435 | .                                |
| rs587373   | 7  | 140269625 | 0.0002593 | -0.04451 | 0.0003413 | DENND2A(0)                       |
| rs11674926 | 2  | 221158354 | 0.0002594 | -0.05619 | 0.000315  | .                                |
| rs35134291 | 4  | 138278619 | 0.0002597 | -0.06289 | 0.0002576 | .                                |
| rs62026599 | 15 | 91804778  | 0.0002597 | -0.05166 | 0.0002586 | SV2B(0)                          |
| rs1076674  | 22 | 32069433  | 0.0002598 | 0.09443  | 0.000267  | C22orf30(-2.808kb)               |
| rs28360059 | 6  | 31155920  | 0.0002599 | -0.06115 | 0.0003011 | POU5F1(+17.47kb) HCG27(-9.678kb) |
| rs10902512 | 12 | 132691362 | 0.0002605 | 0.04453  | 0.0003239 | .                                |
| rs324410   | 1  | 46834173  | 0.0002619 | -0.0932  | 0.00027   | NSUN4(+3.483kb)                  |
| rs10788158 | 10 | 123025375 | 0.0002621 | -0.04809 | 0.0002349 | .                                |
| rs11580964 | 1  | 87712335  | 0.0002628 | 0.04752  | 0.0002125 | .                                |
| rs7013617  | 8  | 117746231 | 0.0002636 | 0.06955  | 0.0002487 | EIF3H(0)                         |
| rs1109790  | 1  | 87710779  | 0.0002637 | 0.04761  | 0.0002106 | .                                |
| rs12600043 | 16 | 15539952  | 0.0002637 | 0.04761  | 0.0002924 | C16orf45(0)                      |
| rs28379534 | 1  | 87709437  | 0.0002637 | 0.07319  | 0.0002106 | .                                |
| rs6498552  | 16 | 15539901  | 0.0002637 | 0.07319  | 0.0002924 | C16orf45(0)                      |
| rs6498553  | 16 | 15539902  | 0.0002637 | 0.07319  | 0.0002924 | C16orf45(0)                      |
| rs9904992  | 17 | 33843152  | 0.000264  | 0.1788   | 0.000282  | .                                |
| rs12031796 | 1  | 246284297 | 0.0002641 | 0.1758   | 0.0002871 | SMYD3(0)                         |
| rs7074335  | 10 | 106700394 | 0.0002648 | -0.08349 | 0.0002931 | SORCS3(0)                        |
| rs12040418 | 1  | 246261253 | 0.0002649 | 0.1775   | 0.0002912 | SMYD3(0)                         |
| rs13005725 | 2  | 221153058 | 0.0002651 | -0.05524 | 0.0003005 | .                                |
| rs10750094 | 11 | 98465358  | 0.0002654 | 0.04675  | 0.0002461 | .                                |
| rs1538408  | 6  | 87338626  | 0.0002658 | -0.04445 | 0.0003254 | .                                |
| rs930188   | 18 | 39451972  | 0.0002658 | -0.06456 | 0.0003738 | .                                |
| rs9989025  | 12 | 114055332 | 0.0002659 | -0.04609 | 0.0002482 | .                                |
| rs16945481 | 15 | 91805060  | 0.0002665 | -0.06247 | 0.0002652 | SV2B(0)                          |
| rs13148623 | 4  | 138274422 | 0.0002667 | -0.05177 | 0.0002623 | .                                |
| rs12031028 | 1  | 184713243 | 0.0002672 | -0.04596 | 0.000334  | EDEM3(0)                         |
| rs971081   | 1  | 184716457 | 0.0002672 | -0.04596 | 0.000334  | EDEM3(0)                         |
| rs10283129 | 8  | 117778673 | 0.0002676 | 0.05295  | 0.0002334 | UTP23(-0.068kb) EIF3H(+10.61kb)  |

|            |    |           |           |          |           |                                  |
|------------|----|-----------|-----------|----------|-----------|----------------------------------|
| rs5998091  | 22 | 32086369  | 0.0002681 | 0.09399  | 0.0002833 | C22orf30(0)                      |
| rs9370483  | 6  | 13818731  | 0.0002685 | 0.04527  | 0.0003292 | CCDC90A(+3.942kb)                |
| rs4936111  | 11 | 130573050 | 0.0002688 | 0.06048  | 0.0002666 | .                                |
| rs6046396  | 20 | 19852503  | 0.0002688 | -0.04863 | 0.0002945 | RIN2(-17.71kb)                   |
| rs16970038 | 17 | 32892039  | 0.0002689 | 0.04708  | 0.0002199 | TMEM132E(-15.73kb) FLJ44815(-9.1 |
| rs60774127 | 6  | 144155882 | 0.0002689 | -0.05305 | 0.0003047 | PHACTR2(+3.56kb) LTV1(-8.625kb)  |
| rs28397277 | 6  | 31164943  | 0.0002696 | -0.06239 | 0.0002995 | HCG27(-0.655kb)                  |
| rs7817411  | 8  | 18036004  | 0.0002696 | 0.05537  | 0.0003064 | .                                |
| rs1567076  | 11 | 32094598  | 0.00027   | 0.07025  | 0.0003185 | RCN1(-18.09kb)                   |
| rs2548124  | 5  | 95011975  | 0.0002702 | -0.0445  | 0.0002449 | SPATA9(0) RFESD(+19.13kb)        |
| rs11071062 | 15 | 54521704  | 0.0002705 | -0.1829  | 0.0002746 | UNC13C(0)                        |
| rs953072   | 7  | 84924332  | 0.0002706 | 0.04554  | 0.0002877 | .                                |
| rs1589603  | 2  | 57507510  | 0.0002707 | -0.06676 | 0.0002064 | .                                |
| rs13124707 | 4  | 177802518 | 0.0002709 | 0.05928  | 0.000184  | .                                |
| rs12563206 | 1  | 87719009  | 0.0002719 | 0.04734  | 0.000226  | .                                |
| rs35531360 | 10 | 27108205  | 0.000272  | -0.0582  | 0.0003095 | ABI1(0)                          |
| rs13117226 | 4  | 138245185 | 0.0002724 | -0.05067 | 0.0002748 | .                                |
| rs1548124  | 8  | 118457084 | 0.0002727 | 0.04753  | 0.0003108 | .                                |
| rs28360057 | 6  | 31155532  | 0.0002731 | -0.06297 | 0.0003141 | POU5F1(+17.08kb) HCG27(-10.07kb) |
| rs12133128 | 1  | 184710588 | 0.0002734 | -0.04587 | 0.0003447 | EDEM3(0)                         |
| rs7755702  | 6  | 31158373  | 0.0002736 | -0.05897 | 0.0002929 | POU5F1(+19.92kb) HCG27(-7.225kb) |
| rs9295958  | 6  | 31158184  | 0.0002736 | -0.05897 | 0.0002929 | POU5F1(+19.73kb) HCG27(-7.414kb) |
| rs518232   | 11 | 75023968  | 0.0002746 | 0.04421  | 0.0002985 | ARRB1(0)                         |
| rs5753753  | 22 | 32082427  | 0.0002749 | 0.09364  | 0.0002907 | C22orf30(0)                      |
| rs5998089  | 22 | 32082345  | 0.0002749 | 0.09364  | 0.0002907 | C22orf30(0)                      |
| rs1556058  | 13 | 70744525  | 0.0002756 | 0.1805   | 0.0002877 | .                                |
| rs16861689 | 2  | 14525434  | 0.0002756 | 0.04571  | 0.0002953 | .                                |
| rs6677073  | 1  | 184656801 | 0.0002757 | -0.04462 | 0.000346  | EDEM3(-2.823kb)                  |
| rs17747961 | 10 | 27100557  | 0.0002761 | -0.05812 | 0.0003119 | ABI1(0)                          |
| rs5010875  | 10 | 27103889  | 0.0002761 | -0.05812 | 0.0003119 | ABI1(0)                          |
| rs11564110 | 12 | 40827579  | 0.0002763 | -0.06507 | 0.0002449 | .                                |
| rs28360061 | 6  | 31160131  | 0.0002764 | -0.05891 | 0.0002994 | HCG27(-5.467kb)                  |
| rs10887957 | 10 | 91175968  | 0.0002768 | -0.05096 | 0.0002533 | SLC16A12(-14.09kb) IFIT5(0) IFIT |
| rs9576437  | 13 | 38645213  | 0.0002771 | -0.07406 | 0.000325  | .                                |
| rs16958570 | 17 | 9575159   | 0.0002778 | 0.06014  | 0.0002451 | USP43(0)                         |
| rs3804088  | 22 | 32079447  | 0.0002778 | 0.0936   | 0.0002925 | C22orf30(0)                      |
| rs2210166  | 1  | 87719524  | 0.0002784 | 0.04714  | 0.0002345 | .                                |
| rs9302909  | 17 | 67886263  | 0.0002784 | -0.05873 | 0.0002892 | .                                |
| rs12146156 | 10 | 123024416 | 0.0002785 | -0.05672 | 0.0002528 | .                                |
| rs10749413 | 10 | 123025665 | 0.0002795 | -0.0478  | 0.000254  | .                                |
| rs9394951  | 6  | 43350753  | 0.0002796 | 0.04363  | 0.0002717 | ZNF318(+13.57kb)                 |
| rs11040777 | 11 | 1731000   | 0.0002797 | 0.107    | 0.0002799 | KRTAP5-6(+12.02kb) HCCA2(0)      |
| rs60669705 | 22 | 32087698  | 0.0002799 | 0.09346  | 0.0002979 | C22orf30(0)                      |
| rs3802614  | 10 | 27045089  | 0.00028   | -0.05799 | 0.0003153 | PDSS1(+9.363kb) ABI1(0)          |
| rs6679069  | 1  | 162813651 | 0.0002801 | -0.0452  | 0.0002903 | C1orf110(-10.44kb)               |
| rs7836549  | 8  | 117697574 | 0.0002801 | 0.06713  | 0.0002554 | EIF3H(0)                         |
| rs11099438 | 4  | 138279187 | 0.0002802 | -0.05854 | 0.0002894 | .                                |

|            |    |           |           |          |           |                                   |
|------------|----|-----------|-----------|----------|-----------|-----------------------------------|
| rs8079599  | 17 | 67896315  | 0.0002802 | -0.05153 | 0.0002953 | .                                 |
| rs7096584  | 10 | 27065976  | 0.0002807 | -0.05808 | 0.0003155 | ABI1(0)                           |
| rs17074900 | 8  | 5673926   | 0.0002812 | 0.06823  | 0.0003066 | .                                 |
| rs35254572 | 18 | 39451496  | 0.0002816 | -0.04441 | 0.0003978 | .                                 |
| rs2835165  | 21 | 37310356  | 0.0002819 | 0.04651  | 0.0002452 | .                                 |
| rs4754531  | 11 | 98466496  | 0.0002819 | -0.04447 | 0.0002644 | .                                 |
| rs483418   | 13 | 69041310  | 0.0002821 | -0.04789 | 0.0003116 | .                                 |
| rs7485305  | 12 | 132689923 | 0.0002824 | 0.04426  | 0.0003551 | .                                 |
| rs7033687  | 9  | 138542618 | 0.0002827 | 0.04519  | 0.0002815 | LCN9(-12.55kb) GLT6D1(+11.23kb)   |
| rs13196249 | 6  | 87302850  | 0.0002837 | -0.06973 | 0.0003751 | .                                 |
| rs17516986 | 15 | 91830481  | 0.0002837 | -0.06773 | 0.000288  | SV2B(0)                           |
| rs12157427 | 22 | 32083756  | 0.0002845 | 0.09338  | 0.0003013 | C22orf30(0)                       |
| rs1473148  | 7  | 48999902  | 0.0002845 | 0.04542  | 0.0002606 | .                                 |
| rs10512184 | 9  | 89993601  | 0.0002848 | -0.07732 | 0.0003066 | .                                 |
| rs11987603 | 8  | 55353200  | 0.0002855 | 0.04367  | 0.0002652 | SOX17(-17.29kb)                   |
| rs4870910  | 8  | 125627154 | 0.0002855 | -0.06014 | 0.0002791 | MTSS1(0)                          |
| rs6912283  | 6  | 43364494  | 0.0002855 | -0.1769  | 0.0002696 | .                                 |
| rs12654613 | 5  | 124243674 | 0.0002857 | -0.0712  | 0.0002452 | .                                 |
| rs2255886  | 21 | 37340617  | 0.0002859 | 0.04542  | 0.0002223 | .                                 |
| rs2409738  | 21 | 37340567  | 0.0002859 | 0.04542  | 0.0002223 | .                                 |
| rs35776394 | 18 | 39451476  | 0.0002862 | -0.04435 | 0.0004055 | .                                 |
| rs2404611  | 1  | 46997127  | 0.0002863 | 0.05378  | 0.0003232 | KNCN(-14.19kb) DMBX1(+17.24kb)    |
| rs10105610 | 8  | 117654088 | 0.0002871 | 0.06754  | 0.0002735 | EIF3H(-2.966kb)                   |
| rs11166927 | 8  | 140796420 | 0.0002878 | -0.04411 | 0.0003487 | NIBP(0)                           |
| rs2014341  | 21 | 34345967  | 0.0002884 | 0.05161  | 0.0002836 | .                                 |
| rs61455148 | 1  | 87722683  | 0.0002888 | 0.04704  | 0.000242  | .                                 |
| rs17805237 | 2  | 57530195  | 0.0002902 | -0.0648  | 0.0002409 | .                                 |
| rs740638   | 17 | 32882000  | 0.0002902 | -0.06424 | 0.0003294 | FLJ44815(-19.14kb)                |
| rs10750025 | 11 | 113424042 | 0.0002905 | -0.0482  | 0.0002971 | .                                 |
| rs12150394 | 17 | 32888769  | 0.0002907 | 0.0506   | 0.0002073 | TMEM132E(-19kb) FLJ44815(-12.37k  |
| rs1478982  | 7  | 95429271  | 0.0002908 | -0.04436 | 0.0002723 | DYNC111(0)                        |
| rs4310577  | 11 | 98463315  | 0.0002914 | 0.04677  | 0.0002666 | .                                 |
| rs28360058 | 6  | 31155615  | 0.0002919 | -0.06064 | 0.0003397 | POU5F1(+17.16kb) HCG27(-9.983kb)  |
| rs5998084  | 22 | 32076919  | 0.000292  | 0.09323  | 0.0003098 | C22orf30(0)                       |
| rs8068409  | 17 | 67860494  | 0.0002921 | -0.05813 | 0.0003208 | .                                 |
| rs9619224  | 22 | 32075899  | 0.0002922 | 0.09382  | 0.000296  | C22orf30(0)                       |
| rs7998530  | 13 | 106132719 | 0.0002927 | 0.04804  | 0.0004143 | DAOA(0)                           |
| rs16915954 | 8  | 52189472  | 0.0002929 | 0.05136  | 0.0003459 | .                                 |
| rs7897619  | 10 | 91090551  | 0.000293  | -0.05137 | 0.0002972 | IFIT3(0)                          |
| rs7464414  | 8  | 117807129 | 0.0002931 | 0.06872  | 0.0002867 | .                                 |
| rs640844   | 11 | 94811579  | 0.0002933 | -0.04404 | 0.0003442 | SFRS2B(+7.191kb) ENDOD1(-11.44kb) |
| rs946152   | 1  | 246289060 | 0.0002937 | 0.1746   | 0.0003214 | SMYD3(0)                          |
| rs2286007  | 12 | 971291    | 0.0002941 | 0.08173  | 0.0003511 | WNK1(0) HSN2(-5.578kb)            |
| rs62530670 | 8  | 125627950 | 0.0002941 | -0.06022 | 0.0002815 | MTSS1(0)                          |
| rs55931128 | 13 | 69088479  | 0.0002942 | -0.05664 | 0.0003091 | .                                 |
| rs13383742 | 2  | 57530326  | 0.0002945 | 0.06106  | 0.000247  | .                                 |
| rs1897143  | 11 | 98545025  | 0.0002945 | -0.06412 | 0.0002655 | .                                 |

|            |    |           |           |          |           |                                  |
|------------|----|-----------|-----------|----------|-----------|----------------------------------|
| rs2338968  | 17 | 32885943  | 0.0002954 | -0.04744 | 0.0002673 | FLJ44815(-15.2kb)                |
| rs2243634  | 21 | 37339862  | 0.0002956 | 0.0451   | 0.000237  | .                                |
| rs9380221  | 6  | 31150873  | 0.0002958 | -0.05664 | 0.0003263 | TCF19(+18.88kb) POU5F1(+12.42kb) |
| rs28704045 | 8  | 755333    | 0.0002962 | 0.05747  | 0.0003142 | .                                |
| rs1478986  | 7  | 95438637  | 0.0002963 | -0.04506 | 0.0002932 | DYNC111(0)                       |
| rs1540847  | 7  | 84968982  | 0.0002966 | 0.04585  | 0.0002971 | .                                |
| rs11199866 | 10 | 123025737 | 0.0002967 | -0.04759 | 0.0002696 | .                                |
| rs62397561 | 6  | 33784105  | 0.0002968 | -0.04982 | 0.0002581 | MLN(+12.31kb)                    |
| rs9295957  | 6  | 31157593  | 0.000297  | -0.06    | 0.0003073 | POU5F1(+19.14kb) HCG27(-8.005kb) |
| rs13260415 | 8  | 140805137 | 0.0002971 | -0.0442  | 0.0003892 | NIBP(0)                          |
| rs4726898  | 7  | 140261516 | 0.0002971 | -0.04438 | 0.0003934 | DENND2A(0)                       |
| rs614112   | 11 | 94813318  | 0.0002975 | 0.04408  | 0.0003419 | SFRS2B(+8.93kb) ENDOD1(-9.698kb) |
| rs8128242  | 21 | 33668891  | 0.0002977 | 0.04518  | 0.0003332 | MRAP(0) C21orf45(+17.52kb)       |
| rs61813512 | 1  | 177724614 | 0.0002978 | 0.1366   | 0.000284  | .                                |
| rs5753578  | 22 | 31765801  | 0.0002983 | 0.09109  | 0.0003118 | .                                |
| rs34672734 | 8  | 117805281 | 0.0002987 | 0.05348  | 0.0002808 | .                                |
| rs7775672  | 6  | 144157093 | 0.0002996 | -0.0525  | 0.0003501 | PHACTR2(+4.771kb) LTV1(-7.414kb) |
| rs10936648 | 3  | 170489791 | 0.0002999 | 0.05876  | 0.0002534 | .                                |
| rs35672615 | 6  | 31274890  | 0.0002999 | -0.06508 | 0.0003534 | .                                |
| rs4820967  | 22 | 31768610  | 0.0003001 | 0.09131  | 0.00031   | .                                |
| rs6469656  | 8  | 117647788 | 0.0003007 | 0.06808  | 0.0002771 | EIF3H(-9.266kb)                  |
| rs1568210  | 15 | 92522306  | 0.0003012 | 0.04557  | 0.0002908 | SLCO3A1(0)                       |
| rs625960   | 7  | 140273150 | 0.0003017 | -0.04448 | 0.0003946 | DENND2A(0)                       |
| rs674866   | 7  | 140274075 | 0.0003017 | -0.04388 | 0.0003946 | DENND2A(0)                       |
| rs8004683  | 14 | 22640041  | 0.0003017 | -0.04388 | 0.0003093 | .                                |
| rs12124929 | 1  | 184710178 | 0.0003018 | -0.04549 | 0.000374  | EDEM3(0)                         |
| rs9477306  | 6  | 17048200  | 0.0003029 | 0.08734  | 0.0002867 | .                                |
| rs12240452 | 10 | 20781989  | 0.0003033 | -0.1566  | 0.0003017 | .                                |
| rs12240588 | 10 | 20782241  | 0.0003033 | -0.1566  | 0.0003017 | .                                |
| rs12251618 | 10 | 20780269  | 0.0003033 | -0.1566  | 0.0003017 | .                                |
| rs12259227 | 10 | 20780312  | 0.0003033 | -0.1566  | 0.0003017 | .                                |
| rs12259659 | 10 | 20777316  | 0.0003033 | -0.1566  | 0.0003017 | .                                |
| rs12262519 | 10 | 20780789  | 0.0003033 | -0.1566  | 0.0003017 | .                                |
| rs12262779 | 10 | 20781177  | 0.0003033 | -0.1566  | 0.0003017 | .                                |
| rs7895749  | 10 | 20779657  | 0.0003033 | -0.1566  | 0.0003017 | .                                |
| rs7899224  | 10 | 20779974  | 0.0003033 | -0.1566  | 0.0003017 | .                                |
| rs17084550 | 4  | 55495726  | 0.0003039 | 0.06181  | 0.000325  | .                                |
| rs6838906  | 4  | 178072504 | 0.000304  | 0.1377   | 0.0003092 | .                                |
| rs11613829 | 12 | 40784253  | 0.0003042 | -0.06503 | 0.0002683 | .                                |
| rs9693397  | 8  | 54456804  | 0.0003042 | -0.102   | 0.0002503 | .                                |
| rs11794067 | 9  | 89971603  | 0.0003047 | -0.07028 | 0.0003197 | .                                |
| rs11507945 | 6  | 31145755  | 0.0003059 | -0.05737 | 0.0003547 | TCF19(+13.76kb) POU5F1(+7.304kb) |
| rs12656060 | 5  | 124247974 | 0.0003066 | -0.07087 | 0.0002656 | .                                |
| rs12656225 | 5  | 124242856 | 0.0003066 | -0.07087 | 0.0002656 | .                                |
| rs36073700 | 13 | 38648549  | 0.0003069 | -0.07289 | 0.0003532 | .                                |
| rs301430   | 9  | 4576680   | 0.0003075 | -0.05014 | 0.0003029 | SLC1A1(0)                        |
| rs4498770  | 1  | 184638266 | 0.0003076 | -0.04472 | 0.0003405 | .                                |

|            |    |           |           |          |           |                                   |
|------------|----|-----------|-----------|----------|-----------|-----------------------------------|
| rs12455820 | 18 | 39457609  | 0.0003081 | -0.04404 | 0.000408  | .                                 |
| rs10080355 | 6  | 144092905 | 0.0003082 | -0.04626 | 0.000277  | PHACTR2(0)                        |
| rs12932337 | 16 | 89630630  | 0.0003088 | -0.06125 | 0.0002821 | SPG7(+6.456kb) RPL13(+0.782kb) C  |
| rs2833697  | 21 | 33556137  | 0.0003088 | 0.04555  | 0.0003262 | .                                 |
| rs12489988 | 3  | 121723700 | 0.0003092 | 0.07902  | 0.0003677 | ILDR1(0)                          |
| rs2136907  | 11 | 7973233   | 0.0003096 | 0.06002  | 0.0003516 | OR10A3(+12.17kb) NLRP10(-7.922kb) |
| rs11885735 | 2  | 7155864   | 0.0003098 | -0.04883 | 0.0003524 | RNF144A(0)                        |
| rs9376717  | 6  | 143250403 | 0.0003099 | 0.1289   | 0.0003397 | HIVEP2(0)                         |
| rs17192274 | 6  | 31248033  | 0.00031   | -0.06253 | 0.0003689 | HLA-C(+8.178kb)                   |
| rs1018884  | 17 | 67880836  | 0.0003108 | -0.05023 | 0.0003244 | .                                 |
| rs1024420  | 17 | 67882036  | 0.0003108 | -0.05823 | 0.0003244 | .                                 |
| rs1024422  | 17 | 67881380  | 0.0003108 | -0.05823 | 0.0003244 | .                                 |
| rs10852722 | 17 | 67868170  | 0.0003108 | -0.05823 | 0.0003244 | .                                 |
| rs12103558 | 17 | 67873074  | 0.0003108 | -0.05823 | 0.0003244 | .                                 |
| rs12602355 | 17 | 67868593  | 0.0003108 | -0.05823 | 0.0003244 | .                                 |
| rs2188660  | 17 | 67886969  | 0.0003108 | -0.05823 | 0.0003244 | .                                 |
| rs2188661  | 17 | 67886749  | 0.0003108 | -0.05823 | 0.0003244 | .                                 |
| rs2366019  | 17 | 67882524  | 0.0003108 | -0.05823 | 0.0003244 | .                                 |
| rs2366020  | 17 | 67883361  | 0.0003108 | -0.05823 | 0.0003244 | .                                 |
| rs2886549  | 17 | 67882571  | 0.0003108 | -0.05823 | 0.0003244 | .                                 |
| rs2886550  | 17 | 67882715  | 0.0003108 | -0.05823 | 0.0003244 | .                                 |
| rs35359667 | 10 | 91179694  | 0.0003108 | -0.05823 | 0.0003042 | SLC16A12(-10.36kb) IFIT5(0) IFIT  |
| rs4444382  | 17 | 67880345  | 0.0003108 | -0.05823 | 0.0003244 | .                                 |
| rs58610652 | 17 | 67870799  | 0.0003108 | -0.05823 | 0.0003244 | .                                 |
| rs60575691 | 17 | 67870819  | 0.0003108 | -0.05823 | 0.0003244 | .                                 |
| rs61709476 | 17 | 67868896  | 0.0003108 | -0.05823 | 0.0003244 | .                                 |
| rs7216073  | 17 | 67876227  | 0.0003108 | -0.05823 | 0.0003244 | .                                 |
| rs7224273  | 17 | 67887773  | 0.0003108 | -0.05823 | 0.0003244 | .                                 |
| rs7224709  | 17 | 67883995  | 0.0003108 | -0.05823 | 0.0003244 | .                                 |
| rs972846   | 17 | 67869502  | 0.0003108 | -0.05823 | 0.0003244 | .                                 |
| rs9909041  | 17 | 67865772  | 0.0003108 | -0.05823 | 0.0003244 | .                                 |
| rs9915283  | 17 | 67871352  | 0.0003108 | -0.05823 | 0.0003244 | .                                 |
| rs10878575 | 12 | 40828665  | 0.0003109 | -0.06457 | 0.0002908 | .                                 |
| rs10085939 | 8  | 117684153 | 0.000311  | 0.06651  | 0.0003009 | EIF3H(0)                          |
| rs4472547  | 8  | 117683846 | 0.000311  | 0.06651  | 0.0003009 | EIF3H(0)                          |
| rs4623456  | 8  | 117683771 | 0.000311  | 0.06651  | 0.0003009 | EIF3H(0)                          |
| rs35184720 | 20 | 24388722  | 0.0003111 | -0.1846  | 0.0003052 | .                                 |
| rs1535948  | 6  | 33783883  | 0.000312  | -0.04947 | 0.0002741 | MLN(+12.09kb)                     |
| rs6501353  | 17 | 67876059  | 0.0003121 | -0.0583  | 0.0003219 | .                                 |
| rs9378115  | 6  | 31156465  | 0.0003122 | -0.05839 | 0.0003348 | POU5F1(+18.01kb) HCG27(-9.133kb)  |
| rs9391818  | 6  | 31157738  | 0.0003122 | -0.05839 | 0.0003348 | POU5F1(+19.29kb) HCG27(-7.86kb)   |
| rs9405052  | 6  | 31157709  | 0.0003122 | -0.05839 | 0.0003348 | POU5F1(+19.26kb) HCG27(-7.889kb)  |
| rs11745257 | 5  | 146929299 | 0.0003123 | -0.07083 | 0.0002927 | .                                 |
| rs13359971 | 5  | 124241613 | 0.0003123 | -0.04476 | 0.0002669 | .                                 |
| rs1905377  | 8  | 51550889  | 0.0003136 | 0.06623  | 0.0003334 | SNTG1(0)                          |
| rs3211568  | 16 | 89629780  | 0.0003142 | -0.06001 | 0.0002922 | SPG7(+5.606kb) RPL13(0) CPNE7(-1  |
| rs667863   | 7  | 140271052 | 0.0003146 | -0.04379 | 0.0004109 | DENND2A(0)                        |



|            |    |           |           |          |           |                                  |
|------------|----|-----------|-----------|----------|-----------|----------------------------------|
| rs28360062 | 6  | 31160218  | 0.000315  | 0.04784  | 0.0003452 | HCG27(-5.38kb)                   |
| rs6450965  | 5  | 33223956  | 0.000315  | -0.0584  | 0.0003693 | .                                |
| rs2125737  | 6  | 43327536  | 0.0003151 | 0.04641  | 0.0003377 | ZNF318(0)                        |
| rs2611336  | 6  | 43329028  | 0.0003151 | 0.04321  | 0.0003377 | ZNF318(0)                        |
| rs762224   | 21 | 33583831  | 0.0003151 | 0.04321  | 0.0003311 | .                                |
| rs4973961  | 3  | 41570365  | 0.0003159 | 0.06016  | 0.0003171 | ULK4(0)                          |
| rs7814566  | 8  | 52233698  | 0.000316  | 0.05028  | 0.0003969 | PXDNL(0)                         |
| rs5753582  | 22 | 31771182  | 0.0003161 | 0.09092  | 0.0003294 | .                                |
| rs1837087  | 8  | 52226463  | 0.0003162 | 0.05039  | 0.0003866 | PXDNL(-5.673kb)                  |
| rs1082     | 6  | 144145797 | 0.0003174 | -0.05327 | 0.000369  | PHACTR2(0) LTV1(-18.71kb)        |
| rs9342083  | 6  | 87329374  | 0.0003177 | -0.05234 | 0.0003307 | .                                |
| rs10808051 | 7  | 140261334 | 0.0003179 | -0.04394 | 0.000419  | DENND2A(0)                       |
| rs11778622 | 8  | 140805582 | 0.000319  | -0.04415 | 0.000415  | NIBP(0)                          |
| rs2690300  | 7  | 95436748  | 0.0003194 | -0.04393 | 0.0003083 | DYNC111(0)                       |
| rs12135210 | 1  | 197745243 | 0.0003195 | -0.2042  | 0.0003416 | DENND1B(+0.687kb)                |
| rs2732717  | 7  | 84928058  | 0.0003204 | 0.06168  | 0.0003223 | .                                |
| rs7108633  | 11 | 130570666 | 0.0003204 | 0.04492  | 0.0003235 | .                                |
| rs10892118 | 11 | 98543218  | 0.0003205 | 0.06249  | 0.0002963 | .                                |
| rs1842101  | 7  | 95428585  | 0.0003207 | -0.04444 | 0.0002945 | DYNC111(0)                       |
| rs2442463  | 15 | 33711958  | 0.0003208 | 0.0494   | 0.0003291 | RYR3(0)                          |
| rs5753577  | 22 | 31764176  | 0.0003209 | 0.09635  | 0.0003356 | .                                |
| rs1639948  | 7  | 140263174 | 0.0003212 | -0.04388 | 0.000423  | DENND2A(0)                       |
| rs526070   | 7  | 140263771 | 0.0003212 | -0.04388 | 0.000423  | DENND2A(0)                       |
| rs667416   | 7  | 140263763 | 0.0003212 | -0.04388 | 0.000423  | DENND2A(0)                       |
| rs35830608 | 10 | 91117083  | 0.0003224 | -0.05255 | 0.0003305 | IFIT3(+16.77kb)                  |
| rs1267301  | 1  | 46992853  | 0.0003229 | 0.05383  | 0.0003591 | KNCN(-18.46kb) DMBX1(+12.97kb)   |
| rs9608466  | 22 | 26561478  | 0.0003237 | -0.09337 | 0.0002937 | SEZ6L(-4.001kb)                  |
| rs13196055 | 6  | 22564209  | 0.000324  | -0.07943 | 0.0002964 | HDGFL1(-5.468kb)                 |
| rs1860841  | 7  | 140274916 | 0.0003243 | -0.04373 | 0.0004175 | DENND2A(0)                       |
| rs1317271  | 8  | 117682668 | 0.0003246 | 0.06628  | 0.0003146 | EIF3H(0)                         |
| rs4601347  | 8  | 117687218 | 0.0003246 | 0.06628  | 0.0003146 | EIF3H(0)                         |
| rs4873540  | 8  | 52229215  | 0.0003249 | 0.05102  | 0.0003991 | PXDNL(-2.921kb)                  |
| rs10958256 | 8  | 52178206  | 0.0003252 | 0.05055  | 0.0003984 | .                                |
| rs17652726 | 5  | 3798490   | 0.0003254 | 0.09485  | 0.0003441 | .                                |
| rs4754656  | 11 | 99857172  | 0.0003256 | 0.04479  | 0.0003363 | CNTN5(0)                         |
| rs34540270 | 4  | 138243465 | 0.0003258 | 0.1021   | 0.0003291 | .                                |
| rs62182802 | 2  | 149035724 | 0.0003258 | -0.05013 | 0.0003571 | .                                |
| rs11749905 | 5  | 33217455  | 0.0003259 | 0.04828  | 0.0003767 | .                                |
| rs3211569  | 16 | 89629819  | 0.0003267 | -0.06015 | 0.0003126 | SPG7(+5.645kb) RPL13(0) CPNE7(-1 |
| rs4295527  | 6  | 5385623   | 0.000327  | -0.04828 | 0.0004331 | FARS2(0)                         |
| rs2548123  | 5  | 95012827  | 0.0003274 | -0.04411 | 0.0002888 | SPATA9(0) RFESD(+19.98kb)        |
| rs2078931  | 17 | 67874565  | 0.0003275 | -0.05803 | 0.0003414 | .                                |
| rs640455   | 11 | 94812057  | 0.0003281 | 0.04371  | 0.0003836 | SFRS2B(+7.669kb) ENDOD1(-10.96kb |
| rs653573   | 11 | 94804852  | 0.0003288 | 0.04426  | 0.0003378 | SFRS2B(+0.464kb) ENDOD1(-18.16kb |
| rs610183   | 11 | 94807581  | 0.0003291 | 0.04419  | 0.0003516 | SFRS2B(+3.193kb) ENDOD1(-15.44kb |
| rs11203115 | 10 | 91173397  | 0.0003295 | -0.04943 | 0.0003175 | SLC16A12(-16.66kb) IFIT5(-1.041k |
| rs10022405 | 4  | 94724094  | 0.0003296 | 0.04471  | 0.0003354 | .                                |

|            |    |           |           |          |           |                                  |
|------------|----|-----------|-----------|----------|-----------|----------------------------------|
| rs12428665 | 13 | 38647493  | 0.0003297 | -0.07241 | 0.0003813 | .                                |
| rs8082031  | 17 | 9575948   | 0.0003299 | 0.05976  | 0.0002869 | USP43(0)                         |
| rs10892115 | 11 | 98543035  | 0.0003304 | 0.06047  | 0.0002982 | .                                |
| rs12577166 | 11 | 98542774  | 0.0003304 | 0.06047  | 0.0002982 | .                                |
| rs9394949  | 6  | 43335003  | 0.0003305 | 0.04321  | 0.0003491 | ZNF318(0)                        |
| rs12626733 | 21 | 33623447  | 0.0003308 | 0.05425  | 0.0003551 | C21orf45(-17.08kb)               |
| rs4500070  | 8  | 52237082  | 0.0003313 | 0.04962  | 0.000403  | PXDNL(0)                         |
| rs6983032  | 8  | 117705416 | 0.0003316 | 0.0663   | 0.0003154 | EIF3H(0)                         |
| rs35765654 | 13 | 85840093  | 0.0003318 | 0.1188   | 0.0002912 | .                                |
| rs12256866 | 10 | 20802826  | 0.0003325 | -0.1483  | 0.0003467 | .                                |
| rs7259371  | 19 | 33534641  | 0.0003325 | -0.05571 | 0.0003287 | RHPN2(0)                         |
| rs7210854  | 17 | 72217416  | 0.0003327 | -0.1778  | 0.0003674 | TTYH2(0) RPL38(+11.4kb)          |
| rs9868322  | 3  | 170490910 | 0.0003327 | 0.05854  | 0.0002946 | .                                |
| rs8080969  | 17 | 67896085  | 0.000333  | -0.05776 | 0.0003529 | .                                |
| rs9808025  | 2  | 221164636 | 0.0003331 | -0.05404 | 0.0003871 | .                                |
| rs7193514  | 16 | 77998304  | 0.0003335 | -0.07253 | 0.0003383 | KIAA1576(0)                      |
| rs190034   | 5  | 95017531  | 0.0003338 | -0.04414 | 0.0003084 | SPATA9(0)                        |
| rs16884721 | 8  | 114461787 | 0.0003339 | 0.2062   | 0.0003529 | CSMD3(+12.54kb)                  |
| rs7091364  | 10 | 27071972  | 0.0003344 | -0.058   | 0.0003967 | ABI1(0)                          |
| rs4365449  | 2  | 57552412  | 0.0003345 | -0.06565 | 0.0002682 | .                                |
| rs9298442  | 8  | 52228327  | 0.0003347 | 0.05049  | 0.0003986 | PXDNL(-3.809kb)                  |
| rs2536955  | 7  | 140272991 | 0.0003348 | -0.04361 | 0.0004341 | DENND2A(0)                       |
| rs3885071  | 11 | 28622910  | 0.000335  | 0.1602   | 0.0003533 | .                                |
| rs55998392 | 8  | 52200076  | 0.0003351 | 0.05131  | 0.0003844 | .                                |
| rs16861637 | 3  | 148936749 | 0.0003359 | -0.08373 | 0.0003834 | CP(0)                            |
| rs8068201  | 17 | 67860341  | 0.0003363 | -0.05871 | 0.0003706 | .                                |
| rs11107543 | 12 | 94848578  | 0.0003366 | -0.1844  | 0.0003112 | CCDC41(0)                        |
| rs1788325  | 21 | 28558432  | 0.0003369 | -0.06628 | 0.0003632 | .                                |
| rs6473844  | 8  | 54457206  | 0.000337  | -0.06144 | 0.0002888 | .                                |
| rs714768   | 17 | 67864323  | 0.000337  | -0.1106  | 0.0003361 | .                                |
| rs10788642 | 10 | 91156353  | 0.0003372 | -0.04915 | 0.0003215 | IFIT1L(+11.39kb) IFIT5(-18.09kb) |
| rs12031436 | 1  | 246289111 | 0.0003377 | 0.1709   | 0.000374  | SMYD3(0)                         |
| rs6986651  | 8  | 52219117  | 0.0003378 | 0.05139  | 0.0003878 | PXDNL(-13.02kb)                  |
| rs4406832  | 11 | 130572303 | 0.0003389 | 0.06029  | 0.0003388 | .                                |
| rs2323664  | 13 | 38527667  | 0.000339  | -0.04488 | 0.0003988 | .                                |
| rs647347   | 1  | 183177218 | 0.000339  | -0.06239 | 0.0003222 | LAMC2(0)                         |
| rs6705007  | 2  | 221181863 | 0.0003395 | -0.05432 | 0.0004033 | .                                |
| rs9643999  | 8  | 15271028  | 0.0003397 | 0.06095  | 0.0002997 | .                                |
| rs7217905  | 17 | 27381113  | 0.0003402 | -0.1165  | 0.0003518 | TIAF1(-19.43kb) PIPOX(0) MYO18A( |
| rs12603067 | 17 | 67878792  | 0.0003407 | -0.05788 | 0.0003554 | .                                |
| rs7219349  | 17 | 67883057  | 0.0003407 | -0.05788 | 0.0003554 | .                                |
| rs9302905  | 17 | 67885266  | 0.0003409 | -0.05803 | 0.0003475 | .                                |
| rs9302908  | 17 | 67885867  | 0.0003409 | -0.05803 | 0.0003475 | .                                |
| rs9914510  | 17 | 67886173  | 0.0003409 | -0.05803 | 0.0003475 | .                                |
| rs11255790 | 10 | 8682180   | 0.000341  | 0.04762  | 0.0002968 | .                                |
| rs12363312 | 11 | 60896556  | 0.0003415 | -0.1096  | 0.0003229 | VPS37C(-1.171kb) CD5(+1.233kb)   |
| rs7821565  | 8  | 52216762  | 0.0003415 | -0.07235 | 0.0004013 | PXDNL(-15.37kb)                  |

|            |    |           |           |          |           |                                   |
|------------|----|-----------|-----------|----------|-----------|-----------------------------------|
| rs9566297  | 13 | 38650811  | 0.0003415 | 0.05172  | 0.0003917 | .                                 |
| rs7931415  | 11 | 98473004  | 0.0003417 | 0.05991  | 0.0002873 | .                                 |
| rs2175717  | 3  | 62782972  | 0.0003432 | -0.06718 | 0.0003707 | CADPS(0)                          |
| rs1339662  | 10 | 20796518  | 0.0003434 | -0.147   | 0.0003538 | .                                 |
| rs1339664  | 10 | 20796194  | 0.0003434 | -0.147   | 0.0003538 | .                                 |
| rs55977850 | 9  | 89960290  | 0.0003434 | -0.147   | 0.0003543 | .                                 |
| rs9663477  | 10 | 20797934  | 0.0003434 | -0.06916 | 0.0003538 | .                                 |
| rs1821661  | 2  | 212221462 | 0.0003437 | -0.1805  | 0.0003239 | ERBB4(-18.98kb)                   |
| rs9810714  | 3  | 189933039 | 0.0003437 | 0.06976  | 0.0003376 | .                                 |
| rs9576402  | 13 | 38517070  | 0.0003439 | -0.06398 | 0.0004099 | .                                 |
| rs10773459 | 12 | 128466304 | 0.0003445 | 0.0471   | 0.0004005 | .                                 |
| rs4655944  | 1  | 87722866  | 0.0003445 | 0.0475   | 0.0002832 | .                                 |
| rs12292032 | 11 | 86199673  | 0.0003446 | -0.08084 | 0.0004161 | ME3(0)                            |
| rs13216762 | 6  | 87299408  | 0.0003448 | -0.06739 | 0.0004236 | .                                 |
| rs6987775  | 8  | 52234248  | 0.0003454 | 0.04299  | 0.0004261 | PXDNL(0)                          |
| rs9394948  | 6  | 43334755  | 0.0003454 | 0.05011  | 0.0003688 | ZNF318(0)                         |
| rs34895    | 5  | 95018382  | 0.0003456 | -0.05401 | 0.0003383 | SPATA9(0)                         |
| rs6738343  | 2  | 221169476 | 0.0003456 | -0.04391 | 0.0003959 | .                                 |
| rs472112   | 11 | 75021501  | 0.000346  | 0.04315  | 0.0003729 | ARRB1(0)                          |
| rs4895361  | 5  | 118474205 | 0.0003461 | -0.06072 | 0.0003443 | DMXL1(0)                          |
| rs3134445  | 11 | 130536169 | 0.000347  | 0.05909  | 0.0003591 | .                                 |
| rs1241198  | 1  | 103307465 | 0.0003474 | 0.05636  | 0.0002916 | .                                 |
| rs10505448 | 8  | 125629396 | 0.0003476 | -0.06351 | 0.0003564 | MTSS1(0)                          |
| rs2118108  | 8  | 117654773 | 0.0003478 | 0.06664  | 0.0003293 | EIF3H(-2.281kb)                   |
| rs10892099 | 11 | 98535962  | 0.000348  | 0.05999  | 0.0003202 | .                                 |
| rs62026602 | 15 | 91811278  | 0.0003482 | -0.06881 | 0.0003609 | SV2B(0)                           |
| rs6713264  | 2  | 149057121 | 0.0003493 | 0.06903  | 0.0004032 | .                                 |
| rs2179951  | 6  | 144144421 | 0.0003497 | -0.05291 | 0.0004006 | PHACTR2(0)                        |
| rs56219017 | 9  | 89960152  | 0.00035   | -0.07094 | 0.0003699 | .                                 |
| rs12817997 | 12 | 115859638 | 0.0003506 | -0.0512  | 0.0003037 | .                                 |
| rs2552034  | 2  | 36507357  | 0.0003507 | 0.04468  | 0.0002874 | .                                 |
| rs7842457  | 8  | 52224158  | 0.0003514 | 0.05018  | 0.0004477 | PXDNL(-7.978kb)                   |
| rs4399141  | 1  | 118858588 | 0.0003518 | -0.0716  | 0.0002788 | .                                 |
| rs2013845  | 8  | 125619203 | 0.0003522 | -0.05669 | 0.0003372 | MTSS1(0)                          |
| rs609451   | 11 | 94814049  | 0.0003525 | 0.04316  | 0.0004095 | SFRS2B(+9.661kb) ENDOD1(-8.967kb) |
| rs12603918 | 17 | 67878925  | 0.0003528 | -0.05778 | 0.0003663 | .                                 |
| rs17450926 | 7  | 78350124  | 0.0003529 | -0.05571 | 0.0003681 | MAGI2(0)                          |
| rs6933568  | 6  | 33751261  | 0.0003529 | -0.07861 | 0.0003378 | MLN(-11.19kb) LEMD2(0)            |
| rs1454539  | 2  | 221208500 | 0.000353  | -0.05442 | 0.0003878 | .                                 |
| rs9496777  | 6  | 144154634 | 0.0003531 | -0.05241 | 0.0003978 | PHACTR2(+2.312kb) LTV1(-9.873kb)  |
| rs2106691  | 15 | 91821201  | 0.0003533 | -0.06824 | 0.0003713 | SV2B(0)                           |
| rs34054635 | 2  | 221183409 | 0.0003535 | -0.05419 | 0.0004194 | .                                 |
| rs34920391 | 2  | 221183257 | 0.0003535 | -0.05419 | 0.0004194 | .                                 |
| rs6752294  | 2  | 221183511 | 0.0003535 | -0.05419 | 0.0004194 | .                                 |
| rs7596824  | 2  | 221182514 | 0.0003535 | -0.05419 | 0.0004194 | .                                 |
| rs4586176  | 11 | 130571841 | 0.0003537 | 0.06056  | 0.0003581 | .                                 |
| rs159914   | 9  | 4577130   | 0.0003538 | -0.05061 | 0.0003482 | SLC1A1(0)                         |

|            |    |           |           |          |           |                                  |
|------------|----|-----------|-----------|----------|-----------|----------------------------------|
| rs2521995  | 5  | 95014307  | 0.0003539 | -0.04376 | 0.000313  | SPATA9(0)                        |
| rs12362409 | 11 | 98472117  | 0.0003541 | 0.05971  | 0.0002991 | .                                |
| rs2216595  | 19 | 33533292  | 0.0003551 | -0.05566 | 0.0003306 | RHPN2(0)                         |
| rs4873542  | 8  | 52229543  | 0.0003555 | 0.05027  | 0.0004225 | PXDNL(-2.593kb)                  |
| rs11012109 | 10 | 20807124  | 0.0003557 | -0.1451  | 0.0003458 | .                                |
| rs4623672  | 1  | 87705945  | 0.0003558 | 0.04675  | 0.000305  | .                                |
| rs1639944  | 7  | 140274309 | 0.0003561 | -0.04333 | 0.0004759 | DENND2A(0)                       |
| rs10093917 | 8  | 54513478  | 0.0003562 | -0.1073  | 0.0002914 | .                                |
| rs17450323 | 7  | 78342354  | 0.0003563 | -0.07839 | 0.000368  | MAGI2(0)                         |
| rs1544142  | 13 | 38528141  | 0.0003564 | -0.06217 | 0.0004201 | .                                |
| rs55873439 | 6  | 55050595  | 0.0003566 | -0.08534 | 0.0003767 | HCRTR2(0)                        |
| rs9875833  | 3  | 169303875 | 0.0003566 | -0.06162 | 0.0003286 | MDS1(0)                          |
| rs10911645 | 1  | 184705883 | 0.000357  | -0.04504 | 0.0004492 | EDEM3(0)                         |
| rs2841642  | 6  | 43302285  | 0.000357  | 0.04289  | 0.0003746 | ZNF318(-1.522kb)                 |
| rs7897873  | 10 | 91090709  | 0.0003577 | -0.05083 | 0.0003543 | IFIT3(0)                         |
| rs28567381 | 17 | 32878082  | 0.0003578 | -0.05819 | 0.000389  | .                                |
| rs11961945 | 6  | 31151248  | 0.0003579 | -0.0577  | 0.0004142 | TCF19(+19.26kb) POU5F1(+12.8kb)  |
| rs28749548 | 6  | 31150914  | 0.0003579 | -0.05757 | 0.0004142 | TCF19(+18.92kb) POU5F1(+12.46kb) |
| rs4459587  | 17 | 67882597  | 0.0003579 | -0.05757 | 0.0003724 | .                                |
| rs2696163  | 7  | 84906342  | 0.0003583 | 0.04487  | 0.0003486 | .                                |
| rs11127383 | 2  | 3203852   | 0.0003587 | -0.1198  | 0.0003866 | TSSC1(0)                         |
| rs2833736  | 21 | 33582722  | 0.0003594 | 0.04603  | 0.00041   | .                                |
| rs1227517  | 7  | 95457160  | 0.0003597 | 0.04432  | 0.0003653 | DYNC1I1(0)                       |
| rs11806348 | 1  | 87723918  | 0.0003607 | 0.04639  | 0.0002992 | .                                |
| rs3219282  | 19 | 50887276  | 0.0003607 | -0.07692 | 0.0004245 | POLD1(-0.316kb) NR1H2(+1.009kb)  |
| rs11216130 | 11 | 98473427  | 0.0003612 | 0.05965  | 0.0003026 | .                                |
| rs4876722  | 8  | 118454642 | 0.0003612 | 0.04708  | 0.0003729 | .                                |
| rs153907   | 5  | 95015697  | 0.0003615 | -0.04391 | 0.0003212 | SPATA9(0)                        |
| rs7813377  | 8  | 52238931  | 0.0003618 | 0.04911  | 0.0004444 | PXDNL(0)                         |
| rs4448265  | 8  | 52212012  | 0.0003621 | -0.05755 | 0.0004434 | .                                |
| rs714769   | 17 | 67864367  | 0.0003621 | -0.05755 | 0.0003836 | .                                |
| rs714770   | 17 | 67864483  | 0.0003621 | -0.05755 | 0.0003836 | .                                |
| rs9909532  | 17 | 67865307  | 0.0003621 | 0.05051  | 0.0003836 | .                                |
| rs2457492  | 18 | 68373609  | 0.0003622 | 0.0503   | 0.0004156 | .                                |
| rs10113485 | 8  | 52190571  | 0.0003633 | 0.05019  | 0.0004144 | .                                |
| rs17603241 | 7  | 126038029 | 0.0003634 | 0.1367   | 0.0004121 | .                                |
| rs3733187  | 4  | 5815444   | 0.000364  | -0.05917 | 0.0003515 | EVC(0) CRMP1(-7.046kb)           |
| rs2000945  | 18 | 31365336  | 0.0003643 | 0.04358  | 0.0003413 | .                                |
| rs59036614 | 14 | 94830448  | 0.0003643 | 0.04385  | 0.0003825 | SERPINA1(-12.63kb)               |
| rs10105228 | 8  | 52225473  | 0.0003645 | 0.0499   | 0.0004388 | PXDNL(-6.663kb)                  |
| rs4951651  | 1  | 213080601 | 0.0003647 | -0.05426 | 0.0003566 | FLVCR1(+11.85kb)                 |
| rs62530669 | 8  | 125621258 | 0.0003654 | -0.0578  | 0.0003391 | MTSS1(0)                         |
| rs1056986  | 11 | 94802318  | 0.0003657 | 0.04354  | 0.0003762 | SFRS2B(0)                        |
| rs35879863 | 5  | 33229606  | 0.0003657 | 0.05018  | 0.0003907 | .                                |
| rs9841663  | 3  | 170492948 | 0.000366  | 0.05604  | 0.0003659 | .                                |
| rs28360060 | 6  | 31159533  | 0.0003671 | -0.05948 | 0.0004176 | HCG27(-6.065kb)                  |
| rs35240189 | 8  | 27079834  | 0.0003672 | -0.06854 | 0.000363  | STMN4(-13.98kb)                  |

|            |    |           |           |          |           |                                   |
|------------|----|-----------|-----------|----------|-----------|-----------------------------------|
| rs11711058 | 3  | 68256979  | 0.0003681 | 0.04682  | 0.0003561 | FAM19A1(0)                        |
| rs2845734  | 21 | 37340750  | 0.0003684 | 0.04471  | 0.0002898 | .                                 |
| rs4281147  | 8  | 18003853  | 0.0003694 | 0.0522   | 0.0004098 | .                                 |
| rs7362821  | 20 | 24380240  | 0.0003698 | -0.0579  | 0.0003621 | .                                 |
| rs9302906  | 17 | 67885499  | 0.0003698 | -0.1824  | 0.0003775 | .                                 |
| rs1436766  | 8  | 117652598 | 0.0003699 | 0.06651  | 0.0003297 | EIF3H(-4.456kb)                   |
| rs7083359  | 10 | 8682679   | 0.00037   | 0.04688  | 0.0003275 | .                                 |
| rs269223   | 7  | 140275739 | 0.0003703 | -0.05374 | 0.0004744 | DENND2A(0)                        |
| rs9808274  | 2  | 221166374 | 0.0003703 | -0.04337 | 0.0004307 | .                                 |
| rs654672   | 11 | 94810854  | 0.0003705 | 0.04344  | 0.0004106 | SFRS2B(+6.466kb) ENDOD1(-12.16kb) |
| rs5994440  | 22 | 32266157  | 0.000371  | 0.0619   | 0.0003499 | DEPDC5(0)                         |
| rs11216417 | 11 | 98545521  | 0.0003715 | 0.06224  | 0.0003119 | .                                 |
| rs9836844  | 3  | 170492355 | 0.000372  | 0.05489  | 0.0003223 | .                                 |
| rs9847011  | 3  | 170490811 | 0.000372  | 0.05489  | 0.0003223 | .                                 |
| rs555516   | 7  | 140264703 | 0.0003722 | -0.04356 | 0.0004935 | DENND2A(0)                        |
| rs11942719 | 4  | 6060892   | 0.0003726 | -0.06197 | 0.0004046 | JAKMIP1(0)                        |
| rs11994520 | 8  | 125628685 | 0.0003726 | -0.06293 | 0.0003773 | MTSS1(0)                          |
| rs16956585 | 16 | 66527859  | 0.0003727 | 0.1216   | 0.0003983 | TK2(-15.48kb)                     |
| rs2548125  | 5  | 95011426  | 0.0003727 | -0.04384 | 0.0003383 | SPATA9(0) RFESD(+18.58kb)         |
| rs11991037 | 8  | 52222699  | 0.0003731 | 0.05113  | 0.0004232 | PXDNL(-9.437kb)                   |
| rs1373446  | 11 | 98525492  | 0.0003736 | 0.06029  | 0.0003462 | .                                 |
| rs7599774  | 2  | 221182902 | 0.0003738 | -0.05404 | 0.0004435 | .                                 |
| rs9381237  | 6  | 43320410  | 0.0003739 | 0.04324  | 0.0003782 | ZNF318(0)                         |
| rs59020249 | 5  | 124230384 | 0.0003745 | -0.07042 | 0.0003448 | .                                 |
| rs9357115  | 6  | 31155991  | 0.0003749 | -0.05761 | 0.0004056 | POU5F1(+17.54kb) HCG27(-9.607kb)  |
| rs1454565  | 2  | 221180809 | 0.0003752 | -0.05402 | 0.0004406 | .                                 |
| rs731007   | 7  | 25560705  | 0.0003772 | 0.06127  | 0.0003096 | .                                 |
| rs11967243 | 6  | 31246266  | 0.0003779 | -0.06173 | 0.0004473 | HLA-C(+6.411kb)                   |
| rs6517316  | 21 | 37310833  | 0.0003784 | -0.04337 | 0.0003322 | .                                 |
| rs12591995 | 15 | 94361169  | 0.0003785 | 0.04941  | 0.0004166 | .                                 |
| rs4312282  | 15 | 92529323  | 0.0003785 | 0.04362  | 0.0003502 | SLCO3A1(0)                        |
| rs6469657  | 8  | 117668389 | 0.0003788 | 0.06592  | 0.000361  | EIF3H(0)                          |
| rs17141889 | 7  | 19790755  | 0.0003792 | 0.0601   | 0.0003814 | TMEM196(0)                        |
| rs7278793  | 21 | 37310964  | 0.0003796 | -0.04338 | 0.0003319 | .                                 |
| rs1639945  | 7  | 140263109 | 0.0003798 | -0.04339 | 0.0005015 | DENND2A(0)                        |
| rs6995398  | 8  | 52163226  | 0.0003808 | -0.1284  | 0.0004367 | .                                 |
| rs9515556  | 13 | 89959235  | 0.0003808 | 0.0491   | 0.0004367 | .                                 |
| rs1701979  | 1  | 119208957 | 0.0003813 | 0.07654  | 0.0003069 | .                                 |
| rs1701980  | 1  | 119208900 | 0.0003813 | 0.07654  | 0.0003069 | .                                 |
| rs9380222  | 6  | 31167213  | 0.000382  | -0.05269 | 0.0004517 | HCG27(0)                          |
| rs4651230  | 1  | 184681802 | 0.0003823 | -0.04438 | 0.0004991 | EDEM3(0)                          |
| rs12442051 | 15 | 54533435  | 0.0003824 | -0.1806  | 0.0003827 | UNC13C(0)                         |
| rs16974486 | 17 | 67875204  | 0.0003827 | -0.0585  | 0.0003803 | .                                 |
| rs955857   | 21 | 28557609  | 0.0003828 | -0.06617 | 0.0003746 | .                                 |
| rs957228   | 21 | 28557605  | 0.0003828 | -0.06617 | 0.0003746 | .                                 |
| rs7992543  | 13 | 38518238  | 0.0003831 | -0.06128 | 0.000462  | .                                 |
| rs7994826  | 13 | 38518334  | 0.0003831 | -0.06128 | 0.000462  | .                                 |

|            |    |           |           |          |           |                                   |
|------------|----|-----------|-----------|----------|-----------|-----------------------------------|
| rs6446443  | 4  | 6041744   | 0.0003838 | -0.06948 | 0.0005264 | JAKMIP1(0)                        |
| rs12637518 | 3  | 156963301 | 0.0003839 | 0.05861  | 0.0003797 | VEPH1(-15.4kb)                    |
| rs16958564 | 17 | 9569665   | 0.0003839 | -0.0464  | 0.0002893 | USP43(0)                          |
| rs12983824 | 19 | 28805571  | 0.0003841 | -0.07482 | 0.0003799 | .                                 |
| rs2536954  | 7  | 140272422 | 0.0003841 | -0.04392 | 0.0004753 | DENND2A(0)                        |
| rs9394042  | 6  | 31167011  | 0.0003847 | -0.05263 | 0.0004573 | HCG27(0)                          |
| rs8066737  | 17 | 67860207  | 0.0003855 | -0.05729 | 0.0004086 | .                                 |
| rs28366723 | 17 | 67896987  | 0.0003866 | -0.05701 | 0.0004126 | .                                 |
| rs9635665  | 17 | 67898772  | 0.0003866 | -0.05701 | 0.0004126 | .                                 |
| rs9635666  | 17 | 67898914  | 0.0003866 | -0.05701 | 0.0004126 | .                                 |
| rs915660   | 6  | 31143835  | 0.0003869 | -0.05662 | 0.0004458 | TCF19(+11.84kb) POU5F1(+5.384kb)  |
| rs1436765  | 8  | 117652626 | 0.000387  | 0.06616  | 0.0003626 | EIF3H(-4.428kb)                   |
| rs4289846  | 8  | 117651368 | 0.000387  | 0.06616  | 0.0003626 | EIF3H(-5.686kb)                   |
| rs4335152  | 8  | 117651371 | 0.000387  | 0.06616  | 0.0003626 | EIF3H(-5.683kb)                   |
| rs4422805  | 8  | 117651299 | 0.000387  | 0.06616  | 0.0003626 | EIF3H(-5.755kb)                   |
| rs7830860  | 8  | 117652174 | 0.000387  | 0.06616  | 0.0003626 | EIF3H(-4.88kb)                    |
| rs2242416  | 6  | 43273604  | 0.0003876 | 0.04243  | 0.0004274 | TTBK1(+17.61kb) SLC22A7(+0.328kb) |
| rs10057993 | 5  | 160589740 | 0.0003886 | -0.07877 | 0.000377  | .                                 |
| rs10072626 | 5  | 160587174 | 0.0003889 | -0.07872 | 0.00038   | .                                 |
| rs13230877 | 7  | 79325752  | 0.0003898 | -0.04439 | 0.0004087 | .                                 |
| rs4259617  | 1  | 87725048  | 0.0003906 | 0.0461   | 0.0003268 | .                                 |
| rs4278349  | 1  | 87725833  | 0.0003906 | 0.0461   | 0.0003268 | .                                 |
| rs4561014  | 1  | 87725168  | 0.0003906 | 0.0461   | 0.0003268 | .                                 |
| rs58458824 | 1  | 87726966  | 0.0003906 | 0.0461   | 0.0003268 | .                                 |
| rs59253082 | 8  | 54473944  | 0.0003906 | 0.0461   | 0.000329  | .                                 |
| rs60507195 | 1  | 87727014  | 0.0003906 | -0.1019  | 0.0003268 | .                                 |
| rs1425402  | 4  | 124547402 | 0.0003914 | -0.08428 | 0.0003777 | .                                 |
| rs6964515  | 7  | 85002712  | 0.000392  | 0.04559  | 0.0004022 | .                                 |
| rs12103827 | 17 | 67873145  | 0.0003921 | -0.05732 | 0.0004142 | .                                 |
| rs655070   | 11 | 94810756  | 0.000394  | 0.04281  | 0.0004676 | SFRS2B(+6.368kb) ENDOD1(-12.26kb) |
| rs783770   | 9  | 138461721 | 0.0003947 | -0.04663 | 0.000428  | PAEP(+3.099kb) OBP2A(+19.91kb)    |
| rs6744417  | 2  | 98764923  | 0.000395  | 0.04609  | 0.000378  | VWA3B(0)                          |
| rs9558571  | 13 | 106138366 | 0.0003959 | 0.04732  | 0.0005714 | DAOA(0)                           |
| rs11241775 | 5  | 124224444 | 0.0003963 | -0.07015 | 0.0003426 | .                                 |
| rs7836226  | 8  | 117802867 | 0.0003963 | 0.05192  | 0.0003627 | UTP23(+18.67kb)                   |
| rs61475818 | 12 | 40801496  | 0.0003965 | -0.06428 | 0.0003584 | .                                 |
| rs4289847  | 8  | 117683201 | 0.0003967 | 0.06564  | 0.0003794 | EIF3H(0)                          |
| rs13354132 | 5  | 58214089  | 0.000397  | -0.09058 | 0.0004045 | .                                 |
| rs34401425 | 6  | 31241916  | 0.000397  | -0.04331 | 0.0004738 | HLA-C(+2.061kb)                   |
| rs384537   | 5  | 95008129  | 0.000397  | -0.06136 | 0.0003518 | SPATA9(0) RFESD(+15.29kb)         |
| rs13159550 | 5  | 33221492  | 0.0003973 | 0.04842  | 0.0004439 | .                                 |
| rs11203119 | 10 | 91181648  | 0.0003979 | -0.04937 | 0.0003848 | SLC16A12(-8.407kb) IFIT5(+0.895k  |
| rs12781505 | 10 | 91181033  | 0.0003979 | -0.04937 | 0.0003848 | SLC16A12(-9.022kb) IFIT5(+0.28kb  |
| rs11991652 | 8  | 55342146  | 0.0003983 | -0.1723  | 0.0003747 | .                                 |
| rs4735749  | 8  | 77898932  | 0.0003983 | 0.04477  | 0.0004011 | PXMP3(0)                          |
| rs1949706  | 2  | 57572298  | 0.0003987 | -0.06531 | 0.0003252 | .                                 |
| rs2066389  | 15 | 94367966  | 0.0004    | -0.05694 | 0.0004138 | .                                 |

|            |    |           |           |          |           |                                   |
|------------|----|-----------|-----------|----------|-----------|-----------------------------------|
| rs7465245  | 8  | 54454638  | 0.0004    | -0.09923 | 0.0003371 | .                                 |
| rs4281305  | 1  | 87725937  | 0.0004001 | 0.04604  | 0.0003333 | .                                 |
| rs7844531  | 8  | 52219631  | 0.0004004 | 0.0495   | 0.0004705 | PXDNL(-12.51kb)                   |
| rs1047334  | 17 | 9815187   | 0.0004007 | 0.04614  | 0.0003837 | RCVRN(+6.503kb) GAS7(0)           |
| rs11161959 | 1  | 87731836  | 0.0004008 | 0.04603  | 0.0003352 | .                                 |
| rs11161960 | 1  | 87731962  | 0.0004008 | 0.04603  | 0.0003352 | .                                 |
| rs11161961 | 1  | 87732120  | 0.0004008 | 0.04603  | 0.0003352 | .                                 |
| rs11161962 | 1  | 87732260  | 0.0004008 | 0.04603  | 0.0003352 | .                                 |
| rs11577298 | 1  | 87730319  | 0.0004008 | 0.04603  | 0.0003352 | .                                 |
| rs11579302 | 1  | 87730211  | 0.0004008 | 0.04603  | 0.0003352 | .                                 |
| rs11583437 | 1  | 87729323  | 0.0004008 | 0.04603  | 0.0003352 | .                                 |
| rs12027650 | 1  | 87733907  | 0.0004008 | 0.04603  | 0.0003352 | .                                 |
| rs1888339  | 1  | 87731204  | 0.0004008 | 0.04603  | 0.0003352 | .                                 |
| rs1888340  | 1  | 87731239  | 0.0004008 | 0.04603  | 0.0003352 | .                                 |
| rs1929134  | 1  | 87731550  | 0.0004008 | 0.04603  | 0.0003352 | .                                 |
| rs1929135  | 1  | 87731742  | 0.0004008 | 0.04603  | 0.0003352 | .                                 |
| rs4615820  | 1  | 87733253  | 0.0004008 | 0.04603  | 0.0003352 | .                                 |
| rs55838834 | 1  | 87727640  | 0.0004008 | 0.04603  | 0.0003352 | .                                 |
| rs11216271 | 11 | 98506308  | 0.0004009 | 0.06033  | 0.0003478 | .                                 |
| rs28815868 | 17 | 67872739  | 0.000401  | -0.05758 | 0.0004139 | .                                 |
| rs638067   | 11 | 94805622  | 0.0004015 | 0.04331  | 0.0004225 | SFRS2B(+1.234kb) ENDOD1(-17.39kb) |
| rs1912316  | 10 | 87231783  | 0.0004016 | -0.04865 | 0.0004546 | .                                 |
| rs1931441  | 13 | 71915948  | 0.0004022 | -0.1072  | 0.0003502 | .                                 |
| rs7336115  | 13 | 71916640  | 0.0004022 | -0.1072  | 0.0003502 | .                                 |
| rs981099   | 13 | 71912110  | 0.0004022 | -0.1072  | 0.0003502 | .                                 |
| rs1454569  | 2  | 221170175 | 0.0004034 | -0.05331 | 0.0004657 | .                                 |
| rs34795899 | 2  | 221170741 | 0.0004034 | -0.05331 | 0.0004657 | .                                 |
| rs12675093 | 8  | 117798198 | 0.0004044 | 0.05158  | 0.0003558 | UTP23(+14kb)                      |
| rs2131606  | 17 | 71059408  | 0.0004047 | -0.1109  | 0.0004211 | SLC39A11(0)                       |
| rs62660762 | 7  | 95448504  | 0.000405  | 0.04372  | 0.0004363 | DYNC111(0)                        |
| rs462259   | 5  | 95018934  | 0.0004055 | -0.0434  | 0.0003792 | SPATA9(+0.22kb)                   |
| rs4792325  | 17 | 12960713  | 0.0004057 | -0.04699 | 0.0005202 | .                                 |
| rs35416733 | 8  | 66480622  | 0.0004061 | -0.06234 | 0.0003591 | .                                 |
| rs12547058 | 8  | 117663147 | 0.0004067 | 0.06558  | 0.0003867 | EIF3H(0)                          |
| rs13262725 | 8  | 117661566 | 0.0004067 | 0.06558  | 0.0003867 | EIF3H(0)                          |
| rs13277958 | 8  | 117659542 | 0.0004067 | 0.06558  | 0.0003867 | EIF3H(0)                          |
| rs7820778  | 8  | 117666463 | 0.0004067 | 0.06558  | 0.0003867 | EIF3H(0)                          |
| rs7843852  | 8  | 117676506 | 0.0004067 | 0.06558  | 0.0003867 | EIF3H(0)                          |
| rs55719318 | 6  | 87450170  | 0.0004068 | 0.04444  | 0.0004273 | .                                 |
| rs7925640  | 11 | 98536658  | 0.0004076 | 0.05923  | 0.0003834 | .                                 |
| rs4489674  | 10 | 123028250 | 0.0004082 | -0.04666 | 0.0003686 | .                                 |
| rs10069025 | 5  | 160580003 | 0.0004084 | -0.05802 | 0.0004007 | .                                 |
| rs2182295  | 10 | 27111627  | 0.0004084 | -0.0784  | 0.0004885 | ABI1(0)                           |
| rs16920545 | 10 | 20776232  | 0.0004086 | -0.1496  | 0.0004088 | .                                 |
| rs10035298 | 5  | 160584282 | 0.0004088 | -0.07843 | 0.0003991 | .                                 |
| rs57059662 | 5  | 33217275  | 0.0004088 | 0.04741  | 0.0004727 | .                                 |
| rs10794595 | 10 | 124881502 | 0.0004091 | 0.04593  | 0.0003851 | HMX3(-14.06kb)                    |

|            |    |           |           |          |           |                                   |
|------------|----|-----------|-----------|----------|-----------|-----------------------------------|
| rs2283     | 5  | 106773623 | 0.0004094 | -0.04816 | 0.000455  | EFNA5(0)                          |
| rs1467369  | 21 | 37314276  | 0.0004097 | -0.04312 | 0.0003678 | .                                 |
| rs4813377  | 20 | 19851466  | 0.0004098 | -0.05422 | 0.0004496 | RIN2(-18.74kb)                    |
| rs9572719  | 13 | 71905517  | 0.0004102 | -0.1071  | 0.0003559 | .                                 |
| rs12262668 | 10 | 20781070  | 0.0004104 | -0.1533  | 0.0004068 | .                                 |
| rs2800810  | 10 | 34208739  | 0.0004105 | -0.1048  | 0.0006162 | .                                 |
| rs11216415 | 11 | 98545163  | 0.0004115 | 0.06154  | 0.0003637 | .                                 |
| rs16946923 | 16 | 78001164  | 0.000412  | -0.07181 | 0.0004106 | KIAA1576(0)                       |
| rs8130297  | 21 | 33584784  | 0.0004121 | 0.04529  | 0.0004105 | .                                 |
| rs7827091  | 8  | 140812044 | 0.0004123 | -0.0431  | 0.0005259 | NIBP(0)                           |
| rs1697422  | 1  | 21821897  | 0.0004124 | -0.04201 | 0.0004616 | NBPF3(+10.5kb) ALPL(-13.96kb)     |
| rs10096134 | 8  | 117663998 | 0.0004127 | 0.06757  | 0.0004093 | EIF3H(0)                          |
| rs13360939 | 5  | 58213901  | 0.0004132 | -0.09032 | 0.0004206 | .                                 |
| rs212995   | 5  | 95024273  | 0.0004134 | -0.0434  | 0.0004031 | SPATA9(+5.559kb)                  |
| rs6473595  | 8  | 52229959  | 0.0004143 | 0.0498   | 0.0004915 | PXDNL(-2.177kb)                   |
| rs1415599  | 13 | 38524751  | 0.0004152 | -0.06122 | 0.0004952 | .                                 |
| rs2706882  | 7  | 95436549  | 0.0004157 | -0.04333 | 0.0003981 | DYNC1I1(0)                        |
| rs621252   | 11 | 94807151  | 0.0004162 | 0.04334  | 0.000437  | SFRS2B(+2.763kb) ENDOD1(-15.87kb) |
| rs6833920  | 4  | 37664319  | 0.0004166 | -0.05659 | 0.0004587 | RELL1(0)                          |
| rs10887959 | 10 | 91181853  | 0.0004171 | -0.04933 | 0.0003999 | SLC16A12(-8.202kb) IFIT5(+1.1kb)  |
| rs1799036  | 7  | 95469152  | 0.0004186 | 0.0502   | 0.0003924 | DYNC1I1(0)                        |
| rs2877309  | 5  | 33353780  | 0.0004186 | 0.0449   | 0.0003537 | .                                 |
| rs6922077  | 6  | 31163791  | 0.0004188 | -0.05236 | 0.0005017 | HCG27(-1.807kb)                   |
| rs7833054  | 8  | 117681031 | 0.000419  | 0.06603  | 0.0003902 | EIF3H(0)                          |
| rs6876898  | 5  | 156670047 | 0.0004199 | -0.04932 | 0.0004565 | ITK(0)                            |
| rs2076136  | 22 | 50509196  | 0.0004205 | 0.06165  | 0.0004452 | TTLL8(+16.14kb) MLC1(0) MOV10L1(  |
| rs1030619  | 18 | 39455550  | 0.0004207 | -0.04298 | 0.0005604 | .                                 |
| rs4335153  | 8  | 117651448 | 0.0004207 | 0.06582  | 0.000394  | EIF3H(-5.606kb)                   |
| rs1403274  | 2  | 57574645  | 0.0004208 | -0.06535 | 0.0003366 | .                                 |
| rs680673   | 11 | 94803043  | 0.0004209 | 0.04305  | 0.0004629 | SFRS2B(0) ENDOD1(-19.97kb)        |
| rs11779641 | 8  | 54502928  | 0.0004214 | 0.04821  | 0.0004502 | .                                 |
| rs10051446 | 5  | 124235496 | 0.0004216 | -0.06971 | 0.0003896 | .                                 |
| rs7583812  | 2  | 221168376 | 0.0004222 | -0.05325 | 0.0004805 | .                                 |
| rs9621357  | 22 | 32275852  | 0.0004222 | 0.0627   | 0.0003941 | DEPDC5(0)                         |
| rs59428058 | 8  | 55346340  | 0.0004223 | -0.1719  | 0.0003873 | .                                 |
| rs6998563  | 8  | 55344717  | 0.0004223 | -0.1719  | 0.0003873 | .                                 |
| rs7726033  | 5  | 3792631   | 0.0004231 | 0.08849  | 0.0004314 | .                                 |
| rs269221   | 7  | 140276622 | 0.0004236 | -0.04298 | 0.000541  | DENND2A(0)                        |
| rs34524980 | 1  | 87711174  | 0.0004239 | 0.04619  | 0.0003556 | .                                 |
| rs136740   | 22 | 45928324  | 0.0004242 | 0.06641  | 0.0004001 | FBLN1(0)                          |
| rs4713647  | 6  | 33608379  | 0.0004244 | 0.1834   | 0.0004683 | ITPR3(0)                          |
| rs12955710 | 18 | 57174036  | 0.0004246 | 0.1712   | 0.0005027 | CCBE1(0)                          |
| rs13380730 | 16 | 89630092  | 0.0004252 | -0.05909 | 0.0004058 | SPG7(+5.918kb) RPL13(+0.244kb) C  |
| rs10052111 | 5  | 58207115  | 0.0004254 | -0.05066 | 0.0004367 | .                                 |
| rs11203072 | 10 | 91094538  | 0.0004254 | -0.08808 | 0.0004099 | IFIT3(0)                          |
| rs6730025  | 2  | 3163738   | 0.0004259 | -0.0496  | 0.0003815 | .                                 |
| rs136739   | 22 | 45928147  | 0.000426  | 0.06632  | 0.0004005 | FBLN1(0)                          |



|            |    |           |           |          |           |                                   |
|------------|----|-----------|-----------|----------|-----------|-----------------------------------|
| rs28397300 | 6  | 31209301  | 0.0004261 | -0.05933 | 0.0004435 | .                                 |
| rs1918709  | 7  | 84929668  | 0.0004262 | 0.04424  | 0.0004286 | .                                 |
| rs12547115 | 8  | 138201113 | 0.000427  | -0.1169  | 0.0005566 | .                                 |
| rs9696627  | 9  | 91280173  | 0.0004271 | -0.04409 | 0.0003587 | LOC286238(+13.1kb)                |
| rs9297696  | 8  | 125629674 | 0.0004273 | -0.06269 | 0.0004427 | MTSS1(0)                          |
| rs10078386 | 5  | 124253737 | 0.0004274 | -0.0694  | 0.0003706 | .                                 |
| rs10060855 | 5  | 33216769  | 0.0004277 | 0.04734  | 0.000493  | .                                 |
| rs993468   | 2  | 66095536  | 0.0004279 | 0.05778  | 0.0005071 | .                                 |
| rs2000577  | 11 | 134683861 | 0.000428  | -0.06015 | 0.0003852 | .                                 |
| rs12286813 | 11 | 7971373   | 0.0004281 | 0.05917  | 0.0004901 | OR10A3(+10.31kb) NLRP10(-9.782kb) |
| rs2824767  | 21 | 19729066  | 0.0004286 | 0.05518  | 0.0003761 | PRSS7(0)                          |
| rs11889641 | 2  | 5395103   | 0.0004305 | 0.04433  | 0.0004848 | .                                 |
| rs1453763  | 2  | 5395104   | 0.0004305 | 0.04433  | 0.0004848 | .                                 |
| rs6592051  | 11 | 82257899  | 0.0004306 | -0.04688 | 0.0005114 | .                                 |
| rs16861642 | 3  | 148943028 | 0.000431  | -0.04645 | 0.0004874 | CP(+3.196kb)                      |
| rs7074985  | 10 | 123024888 | 0.000431  | -0.07833 | 0.0003757 | .                                 |
| rs17805963 | 2  | 57571124  | 0.0004317 | 0.1031   | 0.000342  | .                                 |
| rs2254303  | 6  | 43276390  | 0.0004317 | -0.06833 | 0.0004618 | SLC22A7(+3.114kb) CRIP3(0)        |
| rs34418395 | 1  | 119238070 | 0.0004317 | 0.04215  | 0.0003746 | .                                 |
| rs6874130  | 5  | 137618925 | 0.0004319 | 0.051    | 0.0004493 | GFRA3(+8.672kb) CDC25C(-2.033kb)  |
| rs1422133  | 5  | 95010783  | 0.000432  | -0.04303 | 0.0003919 | SPATA9(0) RFESD(+17.94kb)         |
| rs6558872  | 8  | 4238139   | 0.000432  | -0.04254 | 0.0004018 | CSMD1(0)                          |
| rs6986048  | 8  | 66647985  | 0.000432  | -0.06384 | 0.0003911 | PDE7A(0)                          |
| rs13355489 | 5  | 156664822 | 0.0004324 | -0.05827 | 0.0004735 | ITK(0)                            |
| rs6901685  | 6  | 31163796  | 0.0004326 | -0.05265 | 0.0005287 | HCG27(-1.802kb)                   |
| rs6660819  | 1  | 225598675 | 0.0004328 | 0.1324   | 0.0003648 | LBR(0)                            |
| rs11216134 | 11 | 98474850  | 0.000433  | 0.05876  | 0.0003634 | .                                 |
| rs6927253  | 6  | 31164472  | 0.0004333 | -0.05226 | 0.0005236 | HCG27(-1.126kb)                   |
| rs2732721  | 7  | 84916178  | 0.0004335 | 0.04411  | 0.0004302 | .                                 |
| rs9829792  | 3  | 170496237 | 0.0004338 | 0.05437  | 0.00038   | .                                 |
| rs4091085  | 11 | 98537502  | 0.0004345 | 0.05995  | 0.0004019 | .                                 |
| rs62480073 | 8  | 3754953   | 0.0004349 | -0.1499  | 0.0004653 | CSMD1(0)                          |
| rs62480074 | 8  | 3755270   | 0.0004349 | -0.1499  | 0.0004653 | CSMD1(0)                          |
| rs56097049 | 4  | 170926430 | 0.0004353 | -0.09662 | 0.0004972 | MFAP3L(0)                         |
| rs62542094 | 9  | 4561988   | 0.0004354 | -0.05161 | 0.0004582 | SLC1A1(0)                         |
| rs12709089 | 16 | 89630311  | 0.0004362 | -0.06338 | 0.0004016 | SPG7(+6.137kb) RPL13(+0.463kb) C  |
| rs9576424  | 13 | 38604392  | 0.0004362 | -0.05963 | 0.0005002 | .                                 |
| rs7966817  | 12 | 71858436  | 0.0004369 | -0.06762 | 0.0004882 | LGR5(0)                           |
| rs62544419 | 9  | 26538077  | 0.0004371 | 0.1655   | 0.0004998 | .                                 |
| rs6833516  | 4  | 37664142  | 0.0004375 | -0.05562 | 0.0005259 | RELL1(0)                          |
| rs4265539  | 10 | 123024694 | 0.0004376 | -0.04643 | 0.0003801 | .                                 |
| rs62026605 | 15 | 91812545  | 0.000438  | -0.068   | 0.0004876 | SV2B(0)                           |
| rs2024766  | 1  | 184653633 | 0.0004382 | -0.04257 | 0.0005646 | EDEM3(-5.991kb)                   |
| rs2552032  | 2  | 36507446  | 0.000439  | 0.0442   | 0.0003352 | .                                 |
| rs9576441  | 13 | 38654527  | 0.0004396 | -0.07194 | 0.0005239 | .                                 |
| rs4233740  | 2  | 29758503  | 0.0004397 | -0.07157 | 0.0004425 | ALK(0)                            |
| rs2376140  | 8  | 54454971  | 0.0004405 | -0.06526 | 0.0003653 | .                                 |

|            |    |           |           |          |           |                                   |
|------------|----|-----------|-----------|----------|-----------|-----------------------------------|
| rs2889302  | 8  | 54455001  | 0.0004405 | -0.06526 | 0.0003653 | .                                 |
| rs7465454  | 8  | 54454637  | 0.0004405 | -0.09862 | 0.0003653 | .                                 |
| rs9829801  | 3  | 62785301  | 0.0004405 | -0.09862 | 0.0004776 | CADPS(0)                          |
| rs9867095  | 3  | 62785304  | 0.0004405 | -0.09862 | 0.0004776 | CADPS(0)                          |
| rs1337611  | 13 | 38465963  | 0.0004415 | -0.06465 | 0.0004868 | .                                 |
| rs6960620  | 7  | 25528457  | 0.0004418 | 0.06016  | 0.0003672 | .                                 |
| rs10949397 | 6  | 17048176  | 0.0004427 | 0.04401  | 0.000423  | .                                 |
| rs12693158 | 2  | 179162350 | 0.0004427 | 0.08506  | 0.0004645 | OSBPL6(0)                         |
| rs35691438 | 3  | 148940672 | 0.0004431 | -0.06758 | 0.0005241 | CP(+0.84kb)                       |
| rs730264   | 16 | 89620148  | 0.0004433 | -0.05664 | 0.0004344 | SPG7(0) RPL13(-6.941kb)           |
| rs7185055  | 16 | 77993025  | 0.000444  | -0.07261 | 0.0004316 | KIAA1576(0)                       |
| rs12043236 | 1  | 184685197 | 0.0004441 | -0.04292 | 0.0005517 | EDEM3(0)                          |
| rs2207733  | 1  | 184687715 | 0.0004441 | -0.04292 | 0.0005517 | EDEM3(0)                          |
| rs4469687  | 1  | 184679019 | 0.0004441 | -0.04292 | 0.0005517 | EDEM3(0)                          |
| rs61222848 | 1  | 225591493 | 0.0004445 | 0.1321   | 0.000375  | LBR(0)                            |
| rs1585738  | 7  | 95467986  | 0.0004449 | 0.04458  | 0.0004256 | DYNC1I1(0)                        |
| rs4476502  | 3  | 170499426 | 0.0004452 | 0.05435  | 0.0003845 | .                                 |
| rs11216355 | 11 | 98530365  | 0.0004461 | 0.05497  | 0.0004052 | .                                 |
| rs4833932  | 4  | 124546398 | 0.0004463 | -0.08404 | 0.0004244 | .                                 |
| rs10892006 | 11 | 98462500  | 0.0004466 | 0.04982  | 0.0004303 | .                                 |
| rs11216362 | 11 | 98532118  | 0.0004469 | 0.05899  | 0.0004079 | .                                 |
| rs11216363 | 11 | 98532199  | 0.0004469 | 0.05899  | 0.0004079 | .                                 |
| rs7295176  | 12 | 115859196 | 0.0004473 | -0.04977 | 0.0003852 | .                                 |
| rs620343   | 11 | 94807347  | 0.0004487 | 0.0429   | 0.0004705 | SFRS2B(+2.959kb) ENDOD1(-15.67kb) |
| rs622189   | 11 | 94806931  | 0.0004487 | 0.0429   | 0.0004705 | SFRS2B(+2.543kb) ENDOD1(-16.09kb) |
| rs623662   | 11 | 94806942  | 0.0004487 | 0.0429   | 0.0004705 | SFRS2B(+2.554kb) ENDOD1(-16.07kb) |
| rs1508857  | 5  | 33357771  | 0.0004493 | 0.04953  | 0.0003873 | .                                 |
| rs6586183  | 10 | 91091503  | 0.0004501 | -0.0511  | 0.0004541 | IFIT3(0)                          |
| rs2106607  | 17 | 67890836  | 0.0004502 | -0.0563  | 0.0004807 | .                                 |
| rs6495795  | 15 | 29887420  | 0.0004504 | -0.06858 | 0.0004223 | .                                 |
| rs12709088 | 16 | 89630212  | 0.0004505 | -0.04989 | 0.0004258 | SPG7(+6.038kb) RPL13(+0.364kb) C  |
| rs34549867 | 12 | 115857240 | 0.0004505 | -0.05934 | 0.0003869 | .                                 |
| rs1326721  | 13 | 75056748  | 0.0004506 | -0.04234 | 0.0004076 | .                                 |
| rs4339948  | 10 | 91092850  | 0.0004507 | -0.04916 | 0.0004232 | IFIT3(0)                          |
| rs2524185  | 6  | 30424394  | 0.0004511 | -0.04382 | 0.0005685 | .                                 |
| rs2886551  | 17 | 67890407  | 0.0004521 | -0.05642 | 0.0004655 | .                                 |
| rs668402   | 7  | 140264022 | 0.0004521 | -0.05642 | 0.0005923 | DENND2A(0)                        |
| rs739549   | 17 | 67889474  | 0.0004521 | -0.05642 | 0.0004655 | .                                 |
| rs9914815  | 17 | 67892488  | 0.0004521 | -0.04285 | 0.0004655 | .                                 |
| rs758335   | 16 | 2011126   | 0.0004523 | 0.05547  | 0.0005073 | TBL3(-10.94kb) SEPX1(+17.83kb) R  |
| rs4237591  | 11 | 98466268  | 0.0004525 | 0.04552  | 0.0003963 | .                                 |
| rs16888833 | 5  | 58208230  | 0.0004526 | -0.08761 | 0.0004632 | .                                 |
| rs12230935 | 12 | 40782188  | 0.0004531 | -0.06284 | 0.000402  | LRRK2(+19.1kb)                    |
| rs62026634 | 15 | 91819997  | 0.0004533 | -0.06581 | 0.0004726 | SV2B(0)                           |
| rs4629900  | 8  | 117767621 | 0.0004539 | 0.06547  | 0.0004429 | UTP23(-11.12kb) EIF3H(0)          |
| rs17290147 | 5  | 58223087  | 0.0004544 | -0.09003 | 0.0004533 | .                                 |
| rs12587393 | 14 | 86778413  | 0.0004546 | 0.06451  | 0.0004945 | .                                 |

|            |    |           |           |          |           |                         |
|------------|----|-----------|-----------|----------|-----------|-------------------------|
| rs269220   | 7  | 140276997 | 0.0004549 | -0.04277 | 0.0005876 | DENND2A(0)              |
| rs12634749 | 3  | 169306001 | 0.0004556 | -0.08286 | 0.0004241 | MDS1(0)                 |
| rs6555556  | 5  | 873798    | 0.0004556 | 0.06688  | 0.0005149 | TRIP13(-19.2kb) BRD9(0) |
| rs6592663  | 11 | 76421615  | 0.0004559 | -0.05336 | 0.0004889 | .                       |
| rs1116589  | 16 | 77980560  | 0.000456  | -0.06114 | 0.0005166 | KIAA1576(0)             |
| rs34090104 | 6  | 31241353  | 0.000456  | -0.06114 | 0.0005419 | HLA-C(+1.498kb)         |
| rs34412589 | 16 | 77980894  | 0.000456  | -0.06114 | 0.0005166 | KIAA1576(0)             |
| rs35369372 | 16 | 77980891  | 0.000456  | -0.06064 | 0.0005166 | KIAA1576(0)             |
| rs4338122  | 8  | 51557540  | 0.0004561 | 0.06073  | 0.0005038 | SNTG1(0)                |
| rs2833711  | 21 | 33563334  | 0.0004565 | 0.0436   | 0.0004648 | .                       |
| rs2105346  | 6  | 87366748  | 0.0004566 | -0.04373 | 0.0005385 | .                       |
| rs62987162 | 6  | 31167696  | 0.0004578 | -0.05202 | 0.0005417 | HCG27(0)                |
| rs2732719  | 7  | 84917599  | 0.0004579 | 0.04387  | 0.0004583 | .                       |
| rs2732720  | 7  | 84916232  | 0.0004579 | 0.04387  | 0.0004583 | .                       |
| rs10097749 | 8  | 52184121  | 0.0004581 | 0.05006  | 0.0005148 | .                       |
| rs11725630 | 4  | 138255735 | 0.0004586 | -0.0491  | 0.0004447 | .                       |
| rs13107703 | 4  | 138256592 | 0.0004586 | -0.0491  | 0.0004447 | .                       |
| rs1018881  | 17 | 67884845  | 0.0004592 | -0.05654 | 0.0004894 | .                       |
| rs6430823  | 2  | 139836688 | 0.0004593 | -0.05584 | 0.0004898 | .                       |
| rs7026216  | 9  | 8223300   | 0.0004595 | 0.06126  | 0.0004507 | .                       |
| rs34795598 | 18 | 29848028  | 0.0004599 | -0.1153  | 0.0004326 | FAM59A(0)               |
| rs28397282 | 6  | 31165846  | 0.0004603 | -0.07765 | 0.0005575 | HCG27(0)                |
| rs3755641  | 3  | 148941898 | 0.0004603 | -0.07765 | 0.0005157 | CP(+2.066kb)            |
| rs3755644  | 3  | 148941516 | 0.0004603 | -0.05187 | 0.0005157 | CP(+1.684kb)            |
| rs12021645 | 1  | 146716517 | 0.0004606 | -0.08405 | 0.0005861 | FMO5(+19.59kb) CHD1L(0) |
| rs35624930 | 6  | 31272251  | 0.000461  | -0.06231 | 0.0005456 | .                       |
| rs518206   | 7  | 140270928 | 0.0004613 | 0.04739  | 0.0005983 | DENND2A(0)              |
| rs7231955  | 18 | 68372215  | 0.0004613 | -0.04269 | 0.0005389 | .                       |
| rs3787590  | 21 | 19729121  | 0.0004615 | 0.05488  | 0.0004028 | PRSS7(0)                |
| rs61792360 | 3  | 170806645 | 0.0004618 | -0.08451 | 0.0004913 | TNIK(0)                 |
| rs1493914  | 18 | 31362327  | 0.0004619 | 0.04313  | 0.0004209 | .                       |
| rs34766867 | 1  | 100253667 | 0.0004632 | -0.09728 | 0.0004466 | .                       |
| rs4257245  | 17 | 67880236  | 0.0004636 | -0.05694 | 0.0004946 | .                       |
| rs11977054 | 7  | 156555475 | 0.000464  | 0.0619   | 0.0004253 | LMBR1(0)                |
| rs587868   | 11 | 94795755  | 0.0004641 | 0.04225  | 0.0005374 | SFRS2B(-4.3kb)          |
| rs17235583 | 3  | 112330327 | 0.0004645 | -0.07006 | 0.0005222 | CCDC80(0)               |
| rs131251   | 22 | 32130249  | 0.0004651 | 0.08233  | 0.0005193 | DEPDC5(-19.82kb)        |
| rs6473931  | 8  | 55366858  | 0.0004652 | -0.1724  | 0.0004315 | SOX17(-3.636kb)         |
| rs6473932  | 8  | 55367143  | 0.0004652 | -0.1724  | 0.0004315 | SOX17(-3.351kb)         |
| rs7220240  | 17 | 67882899  | 0.0004662 | -0.05649 | 0.0004997 | .                       |
| rs4854106  | 2  | 3213822   | 0.0004664 | -0.1157  | 0.0005948 | TSSC1(0)                |
| rs3737740  | 1  | 47000596  | 0.0004668 | 0.05163  | 0.0005361 | KNCN(-10.72kb)          |
| rs11564239 | 12 | 40826116  | 0.0004676 | -0.06406 | 0.000402  | .                       |
| rs629494   | 7  | 138644343 | 0.0004676 | 0.05115  | 0.0005687 | .                       |
| rs12801743 | 11 | 129810866 | 0.0004677 | 0.1289   | 0.0005015 | PRDM10(0)               |
| rs1420143  | 7  | 29548324  | 0.0004677 | 0.04406  | 0.0005246 | CHN2(0)                 |
| rs6716156  | 2  | 179165635 | 0.000468  | 0.04343  | 0.0004557 | OSBPL6(0)               |

|            |    |           |           |          |           |                                   |
|------------|----|-----------|-----------|----------|-----------|-----------------------------------|
| rs7858819  | 9  | 4559892   | 0.000468  | -0.05107 | 0.0004951 | SLC1A1(0)                         |
| rs35885078 | 3  | 148932169 | 0.00047   | -0.08114 | 0.0005288 | CP(0)                             |
| rs62238930 | 22 | 32288524  | 0.0004701 | 0.06186  | 0.0004432 | DEPDC5(0)                         |
| rs133417   | 22 | 35806815  | 0.0004706 | -0.09466 | 0.0004776 | MCM5(0) HMOX1(+16.62kb)           |
| rs10874647 | 1  | 103169651 | 0.0004707 | 0.0908   | 0.0003604 | .                                 |
| rs10874648 | 1  | 103172941 | 0.0004707 | 0.0908   | 0.0003604 | .                                 |
| rs12021806 | 1  | 103171297 | 0.0004707 | 0.0908   | 0.0003604 | .                                 |
| rs12032539 | 1  | 103166354 | 0.0004707 | 0.0908   | 0.0003604 | .                                 |
| rs12046352 | 1  | 103171599 | 0.0004707 | 0.0908   | 0.0003604 | .                                 |
| rs10815024 | 9  | 4562992   | 0.0004712 | -0.05143 | 0.0004584 | SLC1A1(0)                         |
| rs11995300 | 8  | 125628928 | 0.0004717 | 0.05075  | 0.0004963 | MTSS1(0)                          |
| rs13255431 | 8  | 51556169  | 0.0004717 | -0.06185 | 0.0004844 | SNTG1(0)                          |
| rs4457069  | 5  | 137619591 | 0.0004717 | 0.06354  | 0.000484  | GFRA3(+9.338kb) CDC25C(-1.367kb)  |
| rs13084615 | 3  | 112338027 | 0.0004725 | -0.06849 | 0.0005446 | CCDC80(0)                         |
| rs305465   | 1  | 88184653  | 0.0004733 | -0.05567 | 0.0003897 | .                                 |
| rs10066704 | 5  | 58207012  | 0.0004734 | -0.08732 | 0.0004833 | .                                 |
| rs16915972 | 8  | 52195089  | 0.0004736 | 0.04874  | 0.0005599 | .                                 |
| rs947689   | 15 | 94369529  | 0.0004737 | -0.05671 | 0.0004722 | .                                 |
| rs10948071 | 6  | 43280713  | 0.0004738 | 0.04239  | 0.0004922 | SLC22A7(+7.437kb) CRIP3(+4.183kb) |
| rs1267304  | 1  | 46990426  | 0.0004741 | 0.05075  | 0.0005228 | DMBX1(+10.54kb)                   |
| rs2217988  | 8  | 52235426  | 0.0004741 | 0.04901  | 0.0005845 | PXDNL(0)                          |
| rs7839630  | 8  | 52235495  | 0.0004741 | 0.04901  | 0.0005845 | PXDNL(0)                          |
| rs9380223  | 6  | 31168588  | 0.0004743 | -0.05189 | 0.0005584 | HCG27(0)                          |
| rs1816630  | 8  | 52235700  | 0.0004745 | 0.04908  | 0.0005774 | PXDNL(0)                          |
| rs2409834  | 8  | 11677524  | 0.0004746 | -0.05878 | 0.0004877 | FDFT1(0)                          |
| rs4146532  | 7  | 95471284  | 0.0004756 | 0.0444   | 0.0004574 | DYNC1I1(0)                        |
| rs17641597 | 4  | 163052526 | 0.0004764 | -0.1224  | 0.000475  | FSTL5(0)                          |
| rs7843514  | 8  | 118454438 | 0.0004764 | 0.0471   | 0.0005589 | .                                 |
| rs7098207  | 10 | 8686095   | 0.0004768 | -0.05208 | 0.0004643 | .                                 |
| rs712491   | 14 | 25281843  | 0.0004782 | 0.04603  | 0.0004981 | STXBP6(0)                         |
| rs1818823  | 2  | 57548696  | 0.0004792 | -0.06428 | 0.0003908 | .                                 |
| rs7161599  | 14 | 22638978  | 0.0004793 | -0.04276 | 0.0004812 | .                                 |
| rs8007876  | 14 | 22636029  | 0.0004793 | -0.04276 | 0.0004812 | .                                 |
| rs12627    | 11 | 94802620  | 0.0004801 | 0.04195  | 0.0005578 | SFRS2B(0)                         |
| rs4783645  | 16 | 66580328  | 0.0004802 | 0.1418   | 0.0004948 | TK2(0) CMTM1(-19.96kb) CKLF(-6.1  |
| rs1677842  | 7  | 95468305  | 0.0004804 | 0.04438  | 0.0004535 | DYNC1I1(0)                        |
| rs57738355 | 16 | 77993551  | 0.0004808 | -0.07063 | 0.0004829 | KIAA1576(0)                       |
| rs2774974  | 7  | 138642348 | 0.000481  | 0.04665  | 0.0005155 | .                                 |
| rs9576422  | 13 | 38602174  | 0.0004811 | -0.06218 | 0.0005512 | .                                 |
| rs6981074  | 8  | 52185637  | 0.0004816 | 0.04866  | 0.0005777 | .                                 |
| rs9978000  | 21 | 33548822  | 0.0004818 | 0.04371  | 0.0004754 | .                                 |
| rs8084589  | 18 | 68371755  | 0.0004828 | 0.04739  | 0.0005589 | .                                 |
| rs6663574  | 1  | 213083136 | 0.0004829 | -0.05223 | 0.0004845 | FLVCR1(+14.38kb)                  |
| rs11672177 | 19 | 18802770  | 0.0004833 | 0.0693   | 0.00043   | CRTC1(0)                          |
| rs2769037  | 9  | 138545947 | 0.0004833 | 0.0436   | 0.0004874 | LCN9(-9.22kb) GLT6D1(+14.56kb)    |
| rs34255701 | 6  | 31241600  | 0.0004835 | -0.06037 | 0.0005748 | HLA-C(+1.745kb)                   |
| rs11623687 | 14 | 25323918  | 0.0004837 | 0.04981  | 0.0004969 | STXBP6(0)                         |

|            |    |           |           |          |           |                                  |
|------------|----|-----------|-----------|----------|-----------|----------------------------------|
| rs9380220  | 6  | 31146584  | 0.0004837 | -0.05462 | 0.0005384 | TCF19(+14.59kb) POU5F1(+8.133kb) |
| rs6922756  | 6  | 31164410  | 0.0004843 | -0.05177 | 0.0005853 | HCG27(-1.188kb)                  |
| rs6922994  | 6  | 31164271  | 0.0004843 | -0.05177 | 0.0005853 | HCG27(-1.327kb)                  |
| rs7200530  | 16 | 77981548  | 0.0004844 | -0.06085 | 0.00055   | KIAA1576(0)                      |
| rs7202718  | 16 | 77981952  | 0.0004844 | -0.06085 | 0.00055   | KIAA1576(0)                      |
| rs7203646  | 16 | 77982068  | 0.0004844 | -0.06085 | 0.00055   | KIAA1576(0)                      |
| rs11836783 | 12 | 94997903  | 0.0004845 | 0.1851   | 0.0004846 | TMCC3(0)                         |
| rs13254671 | 8  | 51556262  | 0.0004852 | 0.06344  | 0.0005005 | SNTG1(0)                         |
| rs17096301 | 10 | 91096117  | 0.000486  | -0.04901 | 0.0004552 | IFIT3(0)                         |
| rs10958257 | 8  | 52202900  | 0.0004862 | 0.04862  | 0.0005767 | .                                |
| rs11989863 | 8  | 52196355  | 0.0004862 | 0.04862  | 0.0005767 | .                                |
| rs12542002 | 8  | 52204474  | 0.0004862 | 0.04862  | 0.0005767 | .                                |
| rs2083084  | 8  | 52209371  | 0.0004862 | 0.04862  | 0.0005767 | .                                |
| rs2083085  | 8  | 52209321  | 0.0004862 | 0.04862  | 0.0005767 | .                                |
| rs6992933  | 8  | 52197083  | 0.0004862 | 0.04862  | 0.0005767 | .                                |
| rs7010738  | 8  | 52201998  | 0.0004862 | 0.04862  | 0.0005767 | .                                |
| rs7010916  | 8  | 52202145  | 0.0004862 | 0.04862  | 0.0005767 | .                                |
| rs7028348  | 9  | 138546905 | 0.0004865 | 0.04359  | 0.0004886 | LCN9(-8.262kb) GLT6D1(+15.52kb)  |
| rs9694429  | 8  | 54453200  | 0.000487  | -0.1004  | 0.0004184 | .                                |
| rs9694430  | 8  | 54453205  | 0.000487  | -0.1004  | 0.0004184 | .                                |
| rs11898165 | 2  | 162668902 | 0.0004872 | -0.137   | 0.0005256 | SLC4A10(0)                       |
| rs28464305 | 3  | 169313608 | 0.0004878 | -0.08266 | 0.0004483 | MDS1(0)                          |
| rs4276245  | 4  | 177805098 | 0.0004879 | 0.04225  | 0.0003847 | .                                |
| rs616952   | 11 | 94791575  | 0.0004879 | 0.0565   | 0.0005671 | SFRS2B(-8.48kb)                  |
| rs719205   | 3  | 189916935 | 0.000488  | 0.06528  | 0.0004798 | .                                |
| rs12223935 | 11 | 98473159  | 0.0004882 | 0.0595   | 0.0004015 | .                                |
| rs10902509 | 12 | 132687184 | 0.0004892 | 0.0423   | 0.0006084 | .                                |
| rs3796741  | 4  | 8388817   | 0.0004894 | -0.1198  | 0.000479  | ACOX3(0)                         |
| rs12542121 | 8  | 52218176  | 0.0004895 | -0.06334 | 0.0005791 | PXDNL(-13.96kb)                  |
| rs61605216 | 2  | 57484244  | 0.0004895 | 0.04864  | 0.0004077 | .                                |
| rs1935597  | 6  | 87366519  | 0.0004897 | -0.04324 | 0.0005815 | .                                |
| rs2324953  | 6  | 87367230  | 0.0004897 | -0.04324 | 0.0005815 | .                                |
| rs6472147  | 8  | 65612697  | 0.0004898 | -0.04276 | 0.0005023 | CYP7B1(0)                        |
| rs2065082  | 6  | 106596453 | 0.0004899 | 0.05192  | 0.0005271 | .                                |
| rs10058291 | 5  | 58194892  | 0.0004904 | -0.08913 | 0.0005019 | .                                |
| rs1093512  | 13 | 38592416  | 0.000491  | -0.06222 | 0.0005999 | .                                |
| rs55973026 | 18 | 57142903  | 0.0004914 | 0.1765   | 0.0005819 | CCBE1(0)                         |
| rs2877994  | 1  | 184649939 | 0.0004915 | -0.04319 | 0.0006506 | EDEM3(-9.685kb)                  |
| rs1956816  | 14 | 27305789  | 0.0004924 | 0.04535  | 0.0004788 | .                                |
| rs58357998 | 17 | 71050300  | 0.0004927 | -0.07266 | 0.00052   | SLC39A11(0)                      |
| rs7184458  | 16 | 77992723  | 0.0004927 | -0.1162  | 0.0004782 | KIAA1576(0)                      |
| rs7903512  | 10 | 87251813  | 0.0004929 | -0.04789 | 0.0005355 | .                                |
| rs10521159 | 17 | 9562546   | 0.0004936 | 0.05668  | 0.0004452 | WDR16(+15.77kb) USP43(0)         |
| rs7014864  | 8  | 52202029  | 0.0004939 | 0.05028  | 0.0005723 | .                                |
| rs10497728 | 2  | 193058079 | 0.0004942 | -0.07158 | 0.0004673 | TMEFF2(0)                        |
| rs9425341  | 1  | 184659318 | 0.0004946 | -0.04335 | 0.0006023 | EDEM3(-0.306kb)                  |
| rs12526089 | 6  | 22603292  | 0.0004956 | 0.04474  | 0.0005822 | .                                |

|            |    |           |           |          |           |                                  |
|------------|----|-----------|-----------|----------|-----------|----------------------------------|
| rs12679470 | 8  | 5685339   | 0.000496  | 0.08719  | 0.0006065 | .                                |
| rs12679487 | 8  | 5685472   | 0.000496  | 0.08719  | 0.0006065 | .                                |
| rs58551870 | 8  | 5685903   | 0.000496  | 0.08719  | 0.0006065 | .                                |
| rs10242326 | 7  | 25526887  | 0.0004961 | 0.05959  | 0.0004025 | .                                |
| rs16861636 | 3  | 148935893 | 0.000497  | -0.08192 | 0.0005475 | CP(0)                            |
| rs1130552  | 6  | 31236643  | 0.0004971 | -0.06076 | 0.0005868 | HLA-C(0)                         |
| rs2283878  | 22 | 31620563  | 0.0004976 | 0.08736  | 0.0005097 | RNF185(+17.56kb) LIMK2(0)        |
| rs3780878  | 10 | 91099630  | 0.0004979 | -0.0496  | 0.0004784 | IFIT3(0)                         |
| rs17661131 | 7  | 126040897 | 0.000498  | 0.1344   | 0.0005638 | .                                |
| rs16827403 | 1  | 41057570  | 0.0004992 | -0.05748 | 0.0006278 | .                                |
| rs10094879 | 8  | 52184167  | 0.0004994 | -0.1577  | 0.0005966 | .                                |
| rs10107148 | 8  | 52183779  | 0.0004994 | 0.04846  | 0.0005966 | .                                |
| rs10751442 | 1  | 205634671 | 0.0004994 | 0.04846  | 0.0007576 | SLC45A3(0)                       |
| rs7008365  | 8  | 52183635  | 0.0004994 | 0.04846  | 0.0005966 | .                                |
| rs1546481  | 18 | 68372924  | 0.0004996 | 0.04719  | 0.0005629 | .                                |
| rs62154872 | 2  | 98722540  | 0.0004996 | 0.05273  | 0.0004563 | VWA3B(0)                         |
| rs10183890 | 2  | 201313788 | 0.0004999 | 0.1421   | 0.000529  | LOC26010(0)                      |
| rs28379655 | 8  | 125624609 | 0.0004999 | -0.05697 | 0.0004752 | MTSS1(0)                         |
| rs6932070  | 6  | 31198896  | 0.0005001 | -0.05753 | 0.00057   | .                                |
| rs12766862 | 10 | 91092648  | 0.0005008 | -0.04886 | 0.0004744 | IFIT3(0)                         |
| rs1851516  | 2  | 57567456  | 0.000501  | -0.06413 | 0.0003984 | .                                |
| rs2017856  | 21 | 33583931  | 0.0005011 | 0.04428  | 0.0004994 | .                                |
| rs762223   | 21 | 33583818  | 0.0005011 | 0.04428  | 0.0004994 | .                                |
| rs7824324  | 8  | 754741    | 0.0005016 | 0.05506  | 0.0005283 | .                                |
| rs7838145  | 8  | 754576    | 0.0005016 | 0.05506  | 0.0005283 | .                                |
| rs4471760  | 18 | 31374233  | 0.0005018 | 0.04289  | 0.000456  | .                                |
| rs6507062  | 18 | 31374197  | 0.0005018 | 0.04289  | 0.000456  | .                                |
| rs62187561 | 2  | 162345318 | 0.0005022 | 0.1559   | 0.0005287 | .                                |
| rs13212447 | 6  | 22573587  | 0.0005026 | -0.07582 | 0.0004699 | HDGFL1(+2.837kb)                 |
| rs8021982  | 14 | 27306782  | 0.0005027 | 0.04999  | 0.0004648 | .                                |
| rs12126231 | 1  | 184698816 | 0.0005035 | -0.04326 | 0.0006617 | EDEM3(0)                         |
| rs1018616  | 13 | 106041779 | 0.0005046 | 0.04562  | 0.000427  | .                                |
| rs1411705  | 1  | 87728263  | 0.0005046 | 0.05076  | 0.0004243 | .                                |
| rs7829187  | 8  | 91586295  | 0.0005051 | 0.1369   | 0.0005259 | .                                |
| rs956695   | 12 | 966793    | 0.0005052 | 0.08079  | 0.0005738 | WNK1(0) HSN2(-10.08kb)           |
| rs1837086  | 8  | 52226662  | 0.0005058 | 0.0496   | 0.0005954 | PXDNL(-5.474kb)                  |
| rs7524253  | 1  | 47002086  | 0.0005064 | 0.05277  | 0.0006081 | KNCN(-9.229kb)                   |
| rs7721682  | 5  | 34529536  | 0.0005064 | 0.05614  | 0.0006647 | .                                |
| rs2402581  | 7  | 121250594 | 0.000508  | -0.1642  | 0.0005481 | .                                |
| rs11216039 | 11 | 98459127  | 0.0005082 | 0.04481  | 0.0004467 | .                                |
| rs35246584 | 2  | 221177058 | 0.0005082 | -0.05235 | 0.0005948 | .                                |
| rs28885418 | 6  | 87428051  | 0.0005084 | 0.04422  | 0.0005113 | .                                |
| rs2286466  | 16 | 2014283   | 0.0005087 | 0.05571  | 0.0005235 | TBL3(-7.78kb) RPS2(0) RPL3L(+9.6 |
| rs17051006 | 4  | 131313275 | 0.000509  | 0.2127   | 0.0005255 | .                                |
| rs12025784 | 1  | 103175509 | 0.0005091 | 0.0905   | 0.0003865 | .                                |
| rs12036255 | 1  | 103175394 | 0.0005091 | 0.0905   | 0.0003865 | .                                |
| rs16861634 | 3  | 148931524 | 0.0005092 | -0.08083 | 0.0005715 | CP(0)                            |

|            |    |           |           |          |           |                                  |
|------------|----|-----------|-----------|----------|-----------|----------------------------------|
| rs12760321 | 1  | 213083261 | 0.0005095 | -0.05192 | 0.0005103 | FLVCR1(+14.51kb)                 |
| rs6670699  | 1  | 46997270  | 0.0005095 | 0.05114  | 0.0005752 | KNCN(-14.04kb) DMBX1(+17.38kb)   |
| rs11995946 | 8  | 91591863  | 0.0005098 | 0.1351   | 0.000531  | .                                |
| rs1820371  | 4  | 124547335 | 0.0005102 | -0.08291 | 0.0004844 | .                                |
| rs13360226 | 5  | 58212141  | 0.0005104 | -0.08818 | 0.0005248 | .                                |
| rs2732722  | 7  | 84913449  | 0.0005104 | 0.04354  | 0.0005144 | .                                |
| rs17656918 | 2  | 221172846 | 0.0005113 | -0.05232 | 0.0005987 | .                                |
| rs28360064 | 6  | 31162384  | 0.0005113 | -0.05149 | 0.0006118 | HCG27(-3.214kb)                  |
| rs6899874  | 6  | 31162328  | 0.0005113 | -0.05149 | 0.0006118 | HCG27(-3.27kb)                   |
| rs9689919  | 6  | 87361541  | 0.0005113 | -0.04311 | 0.0006081 | .                                |
| rs1227515  | 7  | 95458682  | 0.0005117 | 0.04581  | 0.0004872 | DYNC111(0)                       |
| rs9445508  | 6  | 66050937  | 0.0005117 | -0.04388 | 0.000564  | EGFL11(0)                        |
| rs17656925 | 2  | 221174809 | 0.0005121 | -0.05229 | 0.0006016 | .                                |
| rs7563282  | 2  | 221175093 | 0.0005121 | -0.05229 | 0.0006016 | .                                |
| rs7590045  | 2  | 221175133 | 0.0005121 | -0.05229 | 0.0006016 | .                                |
| rs34626625 | 3  | 148930079 | 0.0005122 | -0.08054 | 0.0005806 | CP(0)                            |
| rs11588475 | 1  | 223912906 | 0.0005154 | 0.1022   | 0.0004533 | CAPN2(0)                         |
| rs6900627  | 6  | 22570245  | 0.0005164 | -0.0463  | 0.000487  | HDGFL1(0)                        |
| rs7463233  | 8  | 755950    | 0.0005165 | 0.05567  | 0.0005393 | .                                |
| rs11031570 | 11 | 32092617  | 0.0005173 | 0.06666  | 0.0005572 | .                                |
| rs1922333  | 7  | 95441331  | 0.0005179 | -0.04331 | 0.0004947 | DYNC111(0)                       |
| rs282696   | 4  | 59424561  | 0.000519  | 0.04323  | 0.0004474 | .                                |
| rs35682273 | 8  | 117796958 | 0.0005192 | 0.05078  | 0.0004488 | UTP23(+12.76kb)                  |
| rs1004547  | 12 | 114940874 | 0.0005199 | -0.1592  | 0.0005106 | .                                |
| rs17734108 | 12 | 114940278 | 0.0005199 | -0.1592  | 0.0005106 | .                                |
| rs6844311  | 4  | 94721747  | 0.0005205 | 0.04381  | 0.0004715 | .                                |
| rs10493966 | 1  | 102421714 | 0.0005206 | -0.04348 | 0.0005325 | OLFM3(0)                         |
| rs12429591 | 13 | 105259730 | 0.0005212 | -0.04538 | 0.000529  | .                                |
| rs1891438  | 6  | 87369418  | 0.0005213 | -0.04309 | 0.0006242 | .                                |
| rs4706279  | 6  | 87444225  | 0.0005214 | 0.04351  | 0.0005349 | .                                |
| rs1765783  | 1  | 231713396 | 0.0005221 | 0.1652   | 0.0006173 | TSNAX(+11.13kb)                  |
| rs2064605  | 1  | 184708618 | 0.0005223 | -0.04389 | 0.0006485 | EDEM3(0)                         |
| rs10086759 | 8  | 91585987  | 0.0005225 | 0.1357   | 0.0005445 | .                                |
| rs4873533  | 8  | 52185407  | 0.0005227 | 0.04832  | 0.0006229 | .                                |
| rs62182830 | 2  | 149065918 | 0.0005228 | 0.09867  | 0.000572  | .                                |
| rs9829730  | 3  | 170496031 | 0.000523  | 0.0538   | 0.0004553 | .                                |
| rs10110    | 9  | 140449582 | 0.0005236 | -0.1024  | 0.0004341 | WDR85(0) PNPLA7(+4.596kb) MRPL41 |
| rs11221986 | 11 | 130024945 | 0.0005236 | 0.05118  | 0.0006402 | ST14(-4.736kb) APLP2(+10.24kb)   |
| rs17142701 | 6  | 6936661   | 0.0005237 | -0.1441  | 0.0005227 | .                                |
| rs34759235 | 8  | 27071936  | 0.0005241 | -0.06905 | 0.0005143 | .                                |
| rs12567226 | 1  | 184678290 | 0.0005253 | -0.04309 | 0.0006926 | EDEM3(0)                         |
| rs12986801 | 2  | 241440020 | 0.0005265 | -0.04298 | 0.0005382 | ANKMY1(0)                        |
| rs2743610  | 6  | 19589595  | 0.0005268 | 0.0605   | 0.000465  | .                                |
| rs4568978  | 11 | 98528045  | 0.0005268 | -0.08219 | 0.0004642 | .                                |
| rs941596   | 14 | 94814999  | 0.0005273 | -0.04232 | 0.00055   | .                                |
| rs10509571 | 10 | 91092558  | 0.0005283 | -0.04862 | 0.0004978 | IFIT3(0)                         |
| rs12761409 | 10 | 18414778  | 0.0005288 | 0.05561  | 0.0005946 | CACNB2(-14.83kb)                 |

|            |    |           |           |          |           |                            |
|------------|----|-----------|-----------|----------|-----------|----------------------------|
| rs7017403  | 8  | 52236652  | 0.000529  | 0.04876  | 0.0006419 | PXDNL(0)                   |
| rs7997063  | 13 | 71899415  | 0.0005297 | -0.1054  | 0.0004702 | .                          |
| rs11216154 | 11 | 98481208  | 0.00053   | 0.05846  | 0.0004701 | .                          |
| rs1018486  | 22 | 31992249  | 0.0005304 | 0.08978  | 0.0005259 | SFI1(0)                    |
| rs10103696 | 8  | 91587103  | 0.0005305 | 0.1347   | 0.0005516 | .                          |
| rs10112324 | 8  | 91589058  | 0.0005305 | 0.1347   | 0.0005516 | .                          |
| rs11986773 | 8  | 91588192  | 0.0005305 | 0.1347   | 0.0005516 | .                          |
| rs11989024 | 8  | 91587326  | 0.0005305 | 0.1347   | 0.0005516 | .                          |
| rs11997371 | 8  | 91588186  | 0.0005305 | 0.1347   | 0.0005516 | .                          |
| rs57435451 | 8  | 91589281  | 0.0005305 | 0.1347   | 0.0005516 | .                          |
| rs61206785 | 8  | 91589535  | 0.0005305 | 0.1347   | 0.0005516 | .                          |
| rs12512991 | 4  | 163071443 | 0.0005312 | -0.1025  | 0.00051   | FSTL5(0)                   |
| rs13435025 | 4  | 37664798  | 0.0005313 | -0.05466 | 0.0006345 | RELL1(0)                   |
| rs6919440  | 6  | 43352898  | 0.0005316 | 0.0416   | 0.0005186 | ZNF318(+15.72kb)           |
| rs17775174 | 16 | 89617518  | 0.0005322 | -0.05582 | 0.0005188 | SPG7(0) RPL13(-9.571kb)    |
| rs61791158 | 3  | 170805604 | 0.0005334 | -0.07592 | 0.0005835 | TNIK(0)                    |
| rs2050279  | 13 | 71900359  | 0.0005335 | -0.1054  | 0.0004723 | .                          |
| rs4300874  | 2  | 57485535  | 0.0005339 | -0.06294 | 0.0004442 | .                          |
| rs7563067  | 2  | 221174954 | 0.000534  | -0.05225 | 0.0006368 | .                          |
| rs9514296  | 13 | 105247086 | 0.0005341 | 0.04729  | 0.0004826 | .                          |
| rs2017901  | 21 | 33584340  | 0.0005342 | 0.04425  | 0.0005365 | .                          |
| rs774414   | 6  | 113589691 | 0.0005345 | 0.1041   | 0.0005621 | .                          |
| rs4534926  | 18 | 31349072  | 0.0005346 | 0.04268  | 0.0004949 | .                          |
| rs10936649 | 3  | 170501343 | 0.0005347 | 0.05361  | 0.0004627 | .                          |
| rs6691351  | 1  | 162813583 | 0.0005349 | -0.04338 | 0.0005608 | C1orf110(-10.5kb)          |
| rs12781453 | 10 | 91140869  | 0.000535  | -0.0475  | 0.0005555 | IFIT1L(0) IFIT1(-11.45kb)  |
| rs28679737 | 8  | 54514925  | 0.0005354 | -0.09732 | 0.0004597 | .                          |
| rs7131729  | 12 | 132663423 | 0.000536  | 0.0459   | 0.0006881 | .                          |
| rs6590484  | 11 | 99857955  | 0.0005361 | -0.04356 | 0.0004971 | CNTN5(0)                   |
| rs10429492 | 9  | 26547991  | 0.0005362 | -0.06052 | 0.0006026 | .                          |
| rs61316312 | 8  | 66512414  | 0.0005362 | 0.1044   | 0.0004717 | ARMC1(-2.659kb)            |
| rs4875098  | 8  | 4218037   | 0.0005368 | 0.04587  | 0.0005511 | CSMD1(0)                   |
| rs1018880  | 17 | 67884961  | 0.0005371 | -0.05695 | 0.0005728 | .                          |
| rs12661297 | 6  | 144087309 | 0.0005375 | -0.04435 | 0.0004966 | PHACTR2(0)                 |
| rs7814694  | 8  | 40885193  | 0.0005379 | -0.1889  | 0.0008203 | .                          |
| rs6489903  | 12 | 114058511 | 0.0005386 | -0.04377 | 0.0005041 | .                          |
| rs2896022  | 22 | 44434950  | 0.0005393 | -0.0421  | 0.0007088 | PARVB(0)                   |
| rs11161963 | 1  | 87735103  | 0.0005396 | 0.04505  | 0.0004649 | .                          |
| rs12463087 | 19 | 33606692  | 0.0005397 | -0.07082 | 0.0006406 | WDR88(-16.3kb) GPATCH1(0)  |
| rs8111153  | 19 | 33606056  | 0.0005397 | -0.07082 | 0.0006406 | WDR88(-16.94kb) GPATCH1(0) |
| rs8111272  | 19 | 33606105  | 0.0005397 | -0.07082 | 0.0006406 | WDR88(-16.89kb) GPATCH1(0) |
| rs1386470  | 8  | 128047588 | 0.0005398 | 0.087    | 0.0005406 | .                          |
| rs1213854  | 1  | 119205175 | 0.0005408 | 0.07459  | 0.0004402 | .                          |
| rs1213855  | 1  | 119205244 | 0.0005408 | 0.07459  | 0.0004402 | .                          |
| rs1742851  | 1  | 119208589 | 0.0005408 | 0.07459  | 0.0004402 | .                          |
| rs2712303  | 1  | 119208388 | 0.0005408 | 0.07459  | 0.0004402 | .                          |
| rs7009706  | 8  | 54507516  | 0.000541  | -0.09732 | 0.0004546 | .                          |



|            |    |           |           |          |           |                                  |
|------------|----|-----------|-----------|----------|-----------|----------------------------------|
| rs7833849  | 8  | 52200047  | 0.0005411 | 0.04927  | 0.0006228 | .                                |
| rs9366769  | 6  | 31169289  | 0.0005415 | -0.05134 | 0.0006472 | HCG27(0)                         |
| rs2743605  | 6  | 19571592  | 0.0005418 | -0.04308 | 0.0004854 | .                                |
| rs2817279  | 6  | 19573444  | 0.0005418 | -0.08388 | 0.0004854 | .                                |
| rs6871090  | 5  | 95133586  | 0.0005418 | -0.08388 | 0.0005329 | RHOBTB3(+1.515kb) GLRX(-15.97kb) |
| rs557424   | 3  | 170469837 | 0.0005422 | 0.05457  | 0.0004582 | .                                |
| rs2169690  | 8  | 54456315  | 0.0005423 | -0.09677 | 0.0004507 | .                                |
| rs2376139  | 8  | 54455670  | 0.0005423 | -0.09677 | 0.0004507 | .                                |
| rs57062325 | 8  | 54474014  | 0.0005423 | -0.09677 | 0.0004507 | .                                |
| rs6473845  | 8  | 54457242  | 0.0005423 | -0.09677 | 0.0004507 | .                                |
| rs6983427  | 8  | 54458669  | 0.0005423 | -0.09677 | 0.0004507 | .                                |
| rs7220878  | 17 | 67883260  | 0.0005425 | -0.05577 | 0.0005593 | .                                |
| rs9872272  | 3  | 189917949 | 0.0005426 | 0.06472  | 0.0005314 | .                                |
| rs1837089  | 8  | 52205904  | 0.0005428 | 0.04828  | 0.0006503 | .                                |
| rs1895975  | 12 | 114064351 | 0.0005429 | -0.043   | 0.0005108 | .                                |
| rs7635759  | 3  | 169309227 | 0.0005431 | -0.08101 | 0.0005078 | MDS1(0)                          |
| rs10484331 | 6  | 8995233   | 0.0005435 | 0.04786  | 0.0006258 | .                                |
| rs7017421  | 8  | 52236676  | 0.0005435 | 0.04858  | 0.0006616 | PXDNL(0)                         |
| rs10461324 | 4  | 188186955 | 0.0005436 | 0.04413  | 0.0005882 | .                                |
| rs12038392 | 1  | 103107137 | 0.0005439 | 0.08722  | 0.0004079 | .                                |
| rs7225840  | 17 | 67884028  | 0.0005442 | -0.06025 | 0.0005794 | .                                |
| rs2421470  | 5  | 156651721 | 0.0005443 | -0.05955 | 0.0005998 | ITK(0)                           |
| rs2016929  | 12 | 114942172 | 0.0005454 | -0.1587  | 0.0005314 | .                                |
| rs35482069 | 6  | 31236231  | 0.0005454 | -0.05979 | 0.0006549 | HLA-C(-0.297kb)                  |
| rs4442098  | 8  | 11677110  | 0.0005458 | -0.05837 | 0.00056   | FDFT1(0)                         |
| rs1293318  | 8  | 11691310  | 0.0005465 | 0.0631   | 0.0006137 | FDFT1(0) CTSB(-8.723kb)          |
| rs726080   | 4  | 55486815  | 0.0005465 | -0.05551 | 0.0006174 | .                                |
| rs7955777  | 12 | 85993325  | 0.0005467 | 0.1575   | 0.0005402 | .                                |
| rs1551386  | 2  | 221215935 | 0.0005475 | -0.2012  | 0.0005794 | .                                |
| rs60959907 | 10 | 123176860 | 0.0005475 | -0.04766 | 0.0005777 | .                                |
| rs6586188  | 10 | 91109343  | 0.0005475 | -0.06067 | 0.0005258 | IFIT3(+9.027kb)                  |
| rs17191181 | 6  | 31171876  | 0.0005477 | -0.05732 | 0.0006108 | HCG27(+0.131kb)                  |
| rs35801917 | 3  | 41623750  | 0.000549  | -0.04633 | 0.0005564 | ULK4(0)                          |
| rs6585716  | 10 | 123029769 | 0.000549  | 0.0555   | 0.0004932 | .                                |
| rs974654   | 17 | 67866666  | 0.0005493 | -0.05698 | 0.0005609 | .                                |
| rs4873192  | 8  | 52223866  | 0.0005499 | 0.05155  | 0.0006381 | PXDNL(-8.27kb)                   |
| rs9354267  | 6  | 66305898  | 0.0005499 | 0.04996  | 0.0005469 | EGFL11(+16.2kb)                  |
| rs61238582 | 7  | 25556565  | 0.0005506 | 0.0618   | 0.0004239 | .                                |
| rs10751443 | 1  | 205634853 | 0.000551  | -0.1579  | 0.0008338 | SLC45A3(0)                       |
| rs11588450 | 1  | 47000996  | 0.0005513 | 0.05245  | 0.0006403 | KNCN(-10.32kb)                   |
| rs6473593  | 8  | 52159913  | 0.0005515 | 0.04814  | 0.0006408 | .                                |
| rs9975780  | 21 | 28051050  | 0.0005516 | -0.1797  | 0.0005367 | .                                |
| rs11203106 | 10 | 91154079  | 0.0005518 | -0.04724 | 0.0005477 | IFIT1L(+9.117kb) IFIT1(0)        |
| rs3088140  | 8  | 117786603 | 0.0005518 | 0.06415  | 0.000539  | UTP23(+2.406kb) EIF3H(+18.54kb)  |
| rs11931225 | 4  | 124456589 | 0.0005519 | 0.04866  | 0.0005982 | .                                |
| rs16863472 | 2  | 5389987   | 0.0005519 | 0.06265  | 0.0005605 | .                                |
| rs9886720  | 9  | 4560348   | 0.0005528 | -0.0503  | 0.0005934 | SLC1A1(0)                        |

|            |    |           |           |          |           |                         |
|------------|----|-----------|-----------|----------|-----------|-------------------------|
| rs9886808  | 9  | 4560135   | 0.0005528 | -0.0503  | 0.0005934 | SLC1A1(0)               |
| rs10825632 | 10 | 57597795  | 0.000553  | -0.05871 | 0.0005603 | .                       |
| rs11940084 | 4  | 81491184  | 0.000553  | -0.04474 | 0.0007457 | C4orf22(0)              |
| rs7813242  | 8  | 18035480  | 0.000553  | -0.07891 | 0.0006388 | .                       |
| rs9728828  | 1  | 41071978  | 0.000553  | 0.05583  | 0.0007169 | RIMS3(-14.37kb)         |
| rs8126620  | 21 | 33585670  | 0.0005539 | 0.04473  | 0.0005502 | .                       |
| rs6999446  | 8  | 52229690  | 0.0005544 | 0.04863  | 0.0006638 | PXDNL(-2.446kb)         |
| rs6859673  | 5  | 118400830 | 0.0005547 | -0.06104 | 0.0005756 | DMXL1(-6.253kb)         |
| rs36118255 | 6  | 31235384  | 0.0005549 | -0.06004 | 0.0006679 | HLA-C(-1.144kb)         |
| rs10775655 | 21 | 37319770  | 0.0005552 | -0.06434 | 0.0004925 | .                       |
| rs4550703  | 2  | 57485772  | 0.0005552 | -0.0432  | 0.0004653 | .                       |
| rs2072901  | 1  | 4829835   | 0.0005563 | -0.06875 | 0.0007145 | AJAP1(0)                |
| rs35303934 | 6  | 31234222  | 0.0005573 | -0.06067 | 0.0006924 | HLA-C(-2.306kb)         |
| rs2320614  | 4  | 164070122 | 0.0005575 | -0.04346 | 0.0005569 | NAF1(0)                 |
| rs59593157 | 4  | 58384019  | 0.0005579 | -0.05389 | 0.0005477 | .                       |
| rs4603958  | 3  | 68229327  | 0.000558  | -0.1073  | 0.0005254 | FAM19A1(0)              |
| rs4461935  | 8  | 65700067  | 0.0005585 | -0.04236 | 0.0006034 | CYP7B1(0)               |
| rs2736886  | 14 | 94815400  | 0.0005586 | -0.04211 | 0.0005906 | .                       |
| rs10429490 | 9  | 26547767  | 0.0005587 | 0.09978  | 0.0005115 | .                       |
| rs2013150  | 14 | 94825769  | 0.0005588 | 0.04219  | 0.0005796 | SERPINA1(-17.31kb)      |
| rs62295050 | 4  | 35061580  | 0.0005588 | 0.04661  | 0.0005361 | .                       |
| rs7094825  | 10 | 27068310  | 0.0005592 | -0.05532 | 0.000656  | ABI1(0)                 |
| rs9950118  | 18 | 4633069   | 0.0005592 | -0.04484 | 0.0004679 | .                       |
| rs10791080 | 11 | 99854446  | 0.0005593 | -0.04303 | 0.0005813 | CNTN5(0)                |
| rs58927910 | 10 | 89969894  | 0.0005616 | 0.145    | 0.0005725 | .                       |
| rs6586182  | 10 | 91091486  | 0.000562  | -0.04964 | 0.0005638 | IFIT3(0)                |
| rs9908912  | 17 | 67894548  | 0.0005626 | -0.05836 | 0.0005493 | .                       |
| rs486344   | 20 | 939161    | 0.0005628 | 0.06237  | 0.0006535 | RSPO4(0)                |
| rs8079878  | 17 | 71661726  | 0.0005631 | 0.07508  | 0.0005696 | .                       |
| rs12777447 | 10 | 132849228 | 0.0005632 | -0.1594  | 0.0005669 | .                       |
| rs13005078 | 2  | 231454354 | 0.0005633 | -0.05341 | 0.0007351 | .                       |
| rs34712773 | 10 | 91091041  | 0.0005648 | -0.04883 | 0.0005691 | IFIT3(0)                |
| rs13005614 | 2  | 231454324 | 0.000565  | -0.05338 | 0.0007357 | .                       |
| rs7006154  | 8  | 77971561  | 0.0005652 | 0.04371  | 0.0005354 | .                       |
| rs11745439 | 5  | 33230034  | 0.0005653 | -0.04477 | 0.0005828 | .                       |
| rs12083980 | 1  | 208278877 | 0.0005653 | 0.04866  | 0.0006652 | PLXNA2(0)               |
| rs2281819  | 6  | 33771673  | 0.0005653 | -0.05191 | 0.0005788 | MLN(0) LEMD2(+14.78kb)  |
| rs9899484  | 17 | 67890635  | 0.0005654 | -0.0562  | 0.0005615 | .                       |
| rs10859312 | 12 | 92793867  | 0.0005665 | -0.07576 | 0.0006981 | .                       |
| rs8050075  | 16 | 66524913  | 0.0005666 | 0.1171   | 0.0006126 | TK2(-18.43kb)           |
| rs6084154  | 20 | 2746354   | 0.0005673 | 0.05413  | 0.0005924 | EBF4(+5.6kb)            |
| rs11751669 | 6  | 22571037  | 0.0005676 | -0.04615 | 0.0004829 | HDGFL1(+0.287kb)        |
| rs17304516 | 8  | 66632266  | 0.0005676 | -0.06039 | 0.000506  | PDE7A(0) MTFR1(+9.48kb) |
| rs2683173  | 17 | 71707979  | 0.0005683 | 0.05298  | 0.0006184 | .                       |
| rs10497995 | 2  | 213995346 | 0.000569  | 0.04412  | 0.0005862 | IKZF2(0)                |
| rs4742007  | 9  | 4559775   | 0.000569  | -0.05028 | 0.0006089 | SLC1A1(0)               |
| rs11160030 | 14 | 27305570  | 0.0005691 | 0.04949  | 0.0005353 | .                       |

|            |    |           |           |          |           |                                  |
|------------|----|-----------|-----------|----------|-----------|----------------------------------|
| rs12298327 | 12 | 119301245 | 0.0005706 | -0.05658 | 0.0005507 | .                                |
| rs7796244  | 7  | 25537874  | 0.0005708 | 0.05881  | 0.0004574 | .                                |
| rs2869016  | 20 | 38135213  | 0.000571  | 0.04291  | 0.0005718 | .                                |
| rs11134049 | 5  | 4312071   | 0.0005714 | -0.04329 | 0.0005484 | .                                |
| rs1052989  | 6  | 31146403  | 0.0005715 | -0.1059  | 0.0006349 | TCF19(+14.41kb) POU5F1(+7.952kb) |
| rs35328311 | 1  | 77773901  | 0.0005715 | -0.05359 | 0.0006194 | AK5(0)                           |
| rs10204311 | 2  | 193053923 | 0.0005721 | -0.06986 | 0.0005541 | TMEFF2(0)                        |
| rs4666240  | 2  | 29762340  | 0.0005721 | -0.07024 | 0.0005945 | ALK(0)                           |
| rs11216408 | 11 | 98544273  | 0.0005722 | 0.0599   | 0.0004976 | .                                |
| rs2207801  | 20 | 38134993  | 0.0005736 | 0.043    | 0.0005718 | .                                |
| rs12484724 | 22 | 36041330  | 0.0005749 | -0.0912  | 0.0006139 | APOL6(-3.093kb)                  |
| rs11649747 | 17 | 72215315  | 0.000575  | -0.1901  | 0.0006233 | TTYH2(0) RPL38(+9.296kb)         |
| rs6450961  | 5  | 33215933  | 0.0005757 | 0.04681  | 0.0006724 | .                                |
| rs12268946 | 10 | 20820303  | 0.000576  | -0.1021  | 0.0005378 | .                                |
| rs3135427  | 5  | 32087430  | 0.000576  | -0.1375  | 0.0005871 | PDZD2(0)                         |
| rs61790742 | 1  | 75221716  | 0.000576  | -0.1075  | 0.0005348 | TYW3(0)                          |
| rs6466357  | 7  | 110382512 | 0.0005764 | -0.107   | 0.0005559 | IMMP2L(0)                        |
| rs2333715  | 1  | 184696032 | 0.0005767 | -0.04303 | 0.00075   | EDEM3(0)                         |
| rs7825017  | 8  | 52184778  | 0.0005767 | 0.04795  | 0.00069   | .                                |
| rs9555079  | 13 | 105258541 | 0.0005768 | -0.04437 | 0.0005709 | .                                |
| rs7404803  | 16 | 15530454  | 0.0005769 | 0.06868  | 0.0006363 | C16orf45(0)                      |
| rs10752941 | 1  | 184695571 | 0.000577  | -0.0421  | 0.0007155 | EDEM3(0)                         |
| rs12220990 | 10 | 123026013 | 0.0005773 | -0.0524  | 0.0005679 | .                                |
| rs10911644 | 1  | 184695996 | 0.0005776 | -0.04304 | 0.0007481 | EDEM3(0)                         |
| rs12489232 | 3  | 151775979 | 0.0005779 | 0.05213  | 0.0007257 | .                                |
| rs6489917  | 12 | 114131418 | 0.0005784 | 0.04234  | 0.0006397 | .                                |
| rs59143298 | 17 | 27353382  | 0.0005785 | -0.131   | 0.0006028 | PIPOX(-16.54kb)                  |
| rs7863     | 22 | 36062171  | 0.0005789 | -0.1336  | 0.0006136 | APOL6(0)                         |
| rs3743444  | 15 | 91811749  | 0.0005791 | -0.06553 | 0.000607  | SV2B(0)                          |
| rs34335607 | 3  | 148938678 | 0.0005792 | -0.07782 | 0.000666  | CP(0)                            |
| rs12621461 | 2  | 59147007  | 0.0005793 | 0.08996  | 0.0005573 | .                                |
| rs1523845  | 7  | 79328335  | 0.0005793 | -0.0765  | 0.000613  | .                                |
| rs16914591 | 10 | 61946060  | 0.0005793 | -0.043   | 0.0005409 | ANK3(0)                          |
| rs28450937 | 11 | 81485266  | 0.0005794 | -0.05454 | 0.0007646 | .                                |
| rs13062123 | 3  | 189118216 | 0.0005798 | -0.1308  | 0.0005583 | .                                |
| rs62236175 | 22 | 31755616  | 0.0005799 | 0.08666  | 0.000607  | PATZ1(+13.37kb)                  |
| rs3935477  | 12 | 132688985 | 0.0005802 | 0.04232  | 0.0007114 | .                                |
| rs12306540 | 12 | 115857048 | 0.0005811 | -0.05074 | 0.0005302 | .                                |
| rs4408723  | 2  | 241933967 | 0.0005813 | -0.0667  | 0.0005936 | SNED1(-4.287kb)                  |
| rs2212912  | 21 | 37338398  | 0.0005814 | 0.04219  | 0.0005009 | .                                |
| rs2776275  | 21 | 37337855  | 0.0005814 | 0.04219  | 0.0005009 | .                                |
| rs2776277  | 21 | 37338462  | 0.0005814 | 0.04219  | 0.0005009 | .                                |
| rs2845729  | 21 | 37337294  | 0.0005814 | 0.04219  | 0.0005009 | .                                |
| rs2850065  | 21 | 37337880  | 0.0005814 | 0.04219  | 0.0005009 | .                                |
| rs7819465  | 8  | 119229093 | 0.0005814 | 0.09022  | 0.0005104 | SAMD12(0)                        |
| rs11652995 | 17 | 72215095  | 0.000582  | -0.1903  | 0.0006142 | TTYH2(0) RPL38(+9.076kb)         |
| rs17797794 | 18 | 64162635  | 0.0005823 | -0.055   | 0.0007404 | CDH19(-8.685kb)                  |

|            |    |           |           |          |           |                                 |
|------------|----|-----------|-----------|----------|-----------|---------------------------------|
| rs2412812  | 4  | 58394551  | 0.0005823 | -0.05274 | 0.0005397 | .                               |
| rs12668343 | 7  | 25545837  | 0.0005828 | 0.05795  | 0.0004735 | .                               |
| rs7828211  | 8  | 52160464  | 0.0005842 | 0.04838  | 0.0006803 | .                               |
| rs6701782  | 1  | 213079941 | 0.0005846 | -0.05111 | 0.0005921 | FLVCR1(+11.19kb)                |
| rs34813851 | 20 | 2745077   | 0.0005852 | 0.05373  | 0.0006566 | EBF4(+4.323kb)                  |
| rs56270027 | 1  | 41060350  | 0.0005856 | -0.05698 | 0.0007154 | .                               |
| rs2099590  | 8  | 52213592  | 0.0005859 | 0.0483   | 0.000671  | PXDNL(-18.54kb)                 |
| rs6469660  | 8  | 117797719 | 0.0005864 | 0.05028  | 0.0005183 | UTP23(+13.52kb)                 |
| rs11082925 | 18 | 49976719  | 0.0005865 | -0.04399 | 0.0006896 | DCC(0)                          |
| rs9327090  | 5  | 118509523 | 0.0005866 | -0.05863 | 0.0005743 | DMXL1(0)                        |
| rs28362345 | 6  | 31165836  | 0.0005867 | -0.0435  | 0.0007361 | HCG27(0)                        |
| rs2147420  | 10 | 90759613  | 0.000588  | -0.04173 | 0.000658  | FAS(0)                          |
| rs12266225 | 10 | 20818140  | 0.0005882 | -0.137   | 0.0005606 | .                               |
| rs4813616  | 20 | 2747481   | 0.0005889 | 0.053    | 0.0006532 | EBF4(+6.727kb)                  |
| rs1704822  | 18 | 64160370  | 0.0005897 | -0.05488 | 0.0007484 | CDH19(-10.95kb)                 |
| rs6075586  | 20 | 19855294  | 0.0005897 | -0.05576 | 0.000617  | RIN2(-14.91kb)                  |
| rs12644375 | 4  | 90837980  | 0.0005899 | -0.08664 | 0.0005241 | MMRN1(0)                        |
| rs11033752 | 11 | 36729709  | 0.00059   | 0.05449  | 0.0005632 | .                               |
| rs7631725  | 3  | 169304895 | 0.0005902 | -0.08011 | 0.000587  | MDS1(0)                         |
| rs6696219  | 1  | 47000408  | 0.0005907 | 0.05099  | 0.000678  | KNCN(-10.91kb)                  |
| rs136734   | 22 | 45924173  | 0.0005911 | 0.06952  | 0.0005665 | FBLN1(0)                        |
| rs3015510  | 1  | 119237937 | 0.0005914 | 0.09595  | 0.0005028 | .                               |
| rs261174   | 5  | 4329133   | 0.0005917 | -0.04301 | 0.0005655 | .                               |
| rs10953921 | 7  | 79333109  | 0.0005923 | -0.04318 | 0.0006031 | .                               |
| rs4732717  | 8  | 27100829  | 0.0005928 | -0.053   | 0.0005349 | STMN4(0)                        |
| rs1805311  | 9  | 4561651   | 0.0005929 | -0.05002 | 0.0006279 | SLC1A1(0)                       |
| rs10504389 | 8  | 66556187  | 0.0005934 | 0.1777   | 0.0005115 | MTFR1(-0.786kb) ARMC1(+9.755kb) |
| rs7313238  | 12 | 95003590  | 0.0005934 | -0.06059 | 0.000616  | TMCC3(0)                        |
| rs57288584 | 12 | 114063329 | 0.0005939 | -0.04265 | 0.0005656 | .                               |
| rs6445306  | 3  | 63024129  | 0.0005946 | -0.1074  | 0.0005269 | .                               |
| rs2834035  | 21 | 34342974  | 0.0005951 | 0.04966  | 0.0005621 | .                               |
| rs17277369 | 7  | 12536192  | 0.0005953 | -0.0625  | 0.000605  | .                               |
| rs34644264 | 7  | 12536090  | 0.0005953 | -0.0625  | 0.000605  | .                               |
| rs10944785 | 6  | 65967847  | 0.0005958 | 0.09151  | 0.00056   | .                               |
| rs4742008  | 9  | 4562472   | 0.0005962 | -0.05078 | 0.0005814 | SLC1A1(0)                       |
| rs16838135 | 4  | 6058620   | 0.0005963 | -0.06238 | 0.0007113 | JAKMIP1(0)                      |
| rs10102454 | 8  | 52218259  | 0.0005965 | 0.04923  | 0.000691  | PXDNL(-13.88kb)                 |
| rs332436   | 11 | 36720477  | 0.0005966 | 0.05818  | 0.0006162 | .                               |
| rs34634498 | 6  | 31236400  | 0.0005969 | -0.05932 | 0.0007192 | HLA-C(-0.128kb)                 |
| rs11747031 | 5  | 8918277   | 0.0005972 | 0.04461  | 0.0004997 | .                               |
| rs59544374 | 2  | 215262698 | 0.0005974 | 0.05959  | 0.0006324 | SPAG16(0) LOC402117(-13.76kb)   |
| rs6704752  | 2  | 215263829 | 0.0005974 | 0.05959  | 0.0006324 | SPAG16(0) LOC402117(-12.63kb)   |
| rs2141868  | 7  | 95469428  | 0.0005975 | 0.04391  | 0.0005558 | DYNC1I1(0)                      |
| rs1296874  | 14 | 33453817  | 0.0005987 | 0.05672  | 0.0005643 | NPAS3(0)                        |
| rs56438862 | 5  | 33357227  | 0.0005993 | 0.04858  | 0.0004978 | .                               |
| rs10812402 | 9  | 26470100  | 0.0005997 | 0.1055   | 0.0005306 | .                               |
| rs1939637  | 11 | 82251791  | 0.0005999 | -0.04559 | 0.0007156 | .                               |

|            |    |           |           |          |           |                                  |
|------------|----|-----------|-----------|----------|-----------|----------------------------------|
| rs11994513 | 8  | 125628486 | 0.0006001 | -0.05988 | 0.0006268 | MTSS1(0)                         |
| rs1895974  | 12 | 114064033 | 0.0006009 | -0.04271 | 0.0005728 | .                                |
| rs7322764  | 13 | 38515459  | 0.0006009 | -0.05927 | 0.0007412 | .                                |
| rs17192434 | 2  | 57532939  | 0.0006013 | -0.06152 | 0.0004826 | .                                |
| rs16827406 | 1  | 41059499  | 0.0006018 | -0.05545 | 0.0007461 | .                                |
| rs4854980  | 3  | 180282620 | 0.0006024 | 0.117    | 0.0006624 | .                                |
| rs2282465  | 9  | 140451012 | 0.0006026 | 0.05383  | 0.0005033 | WDR85(0) PNPLA7(+6.026kb) MRPL41 |
| rs3781339  | 10 | 105428152 | 0.0006026 | 0.05075  | 0.0005711 | SH3PXD2A(0)                      |
| rs8103310  | 19 | 30102951  | 0.0006038 | 0.08969  | 0.0006469 | POP4(0)                          |
| rs55691520 | 5  | 125771681 | 0.0006044 | 0.1403   | 0.0006773 | GRAMD3(0)                        |
| rs11749369 | 5  | 33350480  | 0.000605  | 0.04865  | 0.000495  | .                                |
| rs10938745 | 4  | 8714712   | 0.0006054 | 0.05909  | 0.0007729 | .                                |
| rs4962247  | 9  | 140448407 | 0.0006054 | 0.05081  | 0.000501  | WDR85(-0.953kb) PNPLA7(+3.421kb) |
| rs470065   | 22 | 45922844  | 0.0006056 | 0.06952  | 0.0005755 | FBLN1(0)                         |
| rs13252547 | 8  | 65691703  | 0.0006057 | -0.04196 | 0.0006425 | CYP7B1(0)                        |
| rs9974274  | 21 | 33568875  | 0.0006059 | 0.04305  | 0.0006157 | .                                |
| rs10762220 | 10 | 70069521  | 0.0006065 | 0.06256  | 0.0007484 | PBLD(0)                          |
| rs7829562  | 8  | 66629206  | 0.0006068 | -0.05986 | 0.0005485 | PDE7A(-2.106kb) MTFR1(+6.42kb)   |
| rs2187271  | 18 | 64164859  | 0.0006069 | -0.055   | 0.0007973 | CDH19(-6.461kb)                  |
| rs35471967 | 19 | 50893199  | 0.0006075 | -0.07459 | 0.0007048 | POLD1(0) NR1H2(+6.932kb)         |
| rs10886883 | 10 | 123027181 | 0.0006079 | -0.04555 | 0.0005603 | .                                |
| rs12054548 | 4  | 158445097 | 0.0006083 | 0.05952  | 0.0004761 | .                                |
| rs4286276  | 2  | 215264826 | 0.0006083 | 0.08046  | 0.0006435 | SPAG16(0) LOC402117(-11.63kb)    |
| rs61133636 | 1  | 107009368 | 0.0006084 | -0.0606  | 0.0006604 | .                                |
| rs2211398  | 6  | 87370050  | 0.0006085 | -0.04259 | 0.0007192 | .                                |
| rs12150993 | 19 | 33383409  | 0.0006092 | 0.04407  | 0.0008446 | CCDC123(0)                       |
| rs4875099  | 8  | 4218064   | 0.0006098 | 0.04524  | 0.0006218 | CSMD1(0)                         |
| rs1031821  | 1  | 103326762 | 0.0006099 | 0.0534   | 0.0005223 | COL11A1(-15.26kb)                |
| rs6921663  | 6  | 31154620  | 0.0006101 | -0.05083 | 0.0007278 | POU5F1(+16.17kb) HCG27(-10.98kb) |
| rs28516734 | 3  | 170509497 | 0.0006102 | 0.0532   | 0.0005309 | .                                |
| rs13431400 | 2  | 231450755 | 0.0006106 | -0.05241 | 0.0008216 | .                                |
| rs12255504 | 10 | 91092189  | 0.0006117 | -0.04723 | 0.0006034 | IFIT3(0)                         |
| rs6585960  | 10 | 87241413  | 0.0006117 | -0.04854 | 0.0006788 | .                                |
| rs7910389  | 10 | 91091862  | 0.0006117 | -0.04854 | 0.0006034 | IFIT3(0)                         |
| rs10911640 | 1  | 184674409 | 0.000612  | -0.0427  | 0.0007176 | EDEM3(0)                         |
| rs7827510  | 8  | 754025    | 0.0006126 | 0.05417  | 0.0006402 | .                                |
| rs61100499 | 10 | 62461517  | 0.0006128 | 0.1021   | 0.0006461 | .                                |
| rs1894372  | 14 | 22634808  | 0.000614  | -0.04215 | 0.0006131 | .                                |
| rs34915661 | 7  | 12535583  | 0.000615  | -0.06942 | 0.0006501 | .                                |
| rs7608482  | 2  | 193054347 | 0.000615  | -0.06232 | 0.0005974 | TMEFF2(0)                        |
| rs1368364  | 5  | 146926845 | 0.0006155 | -0.04244 | 0.0005851 | .                                |
| rs34519652 | 8  | 117805998 | 0.0006161 | 0.06588  | 0.0006009 | .                                |
| rs80681    | 22 | 45929348  | 0.0006165 | 0.06451  | 0.0005729 | FBLN1(0)                         |
| rs12080565 | 1  | 223905833 | 0.0006171 | 0.09886  | 0.0005692 | CAPN2(0)                         |
| rs2995400  | 10 | 43495101  | 0.0006176 | 0.04153  | 0.0006951 | .                                |
| rs9330472  | 9  | 91282347  | 0.0006178 | -0.04277 | 0.0005144 | LOC286238(+15.27kb)              |
| rs57109098 | 2  | 241932361 | 0.0006183 | -0.06537 | 0.0006124 | SNED1(-5.893kb)                  |

|            |    |           |           |          |           |                                |
|------------|----|-----------|-----------|----------|-----------|--------------------------------|
| rs13095891 | 3  | 48381826  | 0.0006187 | -0.1015  | 0.000727  | SPINK8(+11.99kb)               |
| rs62308636 | 4  | 88879024  | 0.0006198 | -0.04491 | 0.0007671 | SPP1(-17.78kb)                 |
| rs34703972 | 4  | 6033218   | 0.0006202 | -0.07758 | 0.000706  | JAKMIP1(0)                     |
| rs35403494 | 4  | 6033198   | 0.0006202 | -0.07758 | 0.000706  | JAKMIP1(0)                     |
| rs1608216  | 2  | 57506604  | 0.0006205 | -0.06132 | 0.0005067 | .                              |
| rs1608217  | 2  | 57506514  | 0.0006205 | -0.06132 | 0.0005067 | .                              |
| rs61105931 | 2  | 57505963  | 0.0006205 | -0.06132 | 0.0005067 | .                              |
| rs16956575 | 16 | 66521875  | 0.0006208 | 0.1205   | 0.0006399 | .                              |
| rs11812027 | 1  | 86367824  | 0.0006209 | 0.0457   | 0.000599  | COL24A1(0)                     |
| rs12517302 | 5  | 169933055 | 0.000621  | 0.08862  | 0.0005783 | KCNIP1(0)                      |
| rs4820949  | 22 | 31566411  | 0.000621  | 0.04571  | 0.0006493 | RNF185(0)                      |
| rs11915779 | 3  | 170511054 | 0.0006211 | 0.05308  | 0.0005466 | .                              |
| rs1890038  | 1  | 146723941 | 0.0006213 | -0.08225 | 0.0007899 | CHD1L(0)                       |
| rs2354429  | 1  | 146720770 | 0.0006213 | -0.08225 | 0.0007899 | CHD1L(0)                       |
| rs11000608 | 10 | 75089951  | 0.0006221 | -0.09376 | 0.0007748 | TTC18(0)                       |
| rs62154871 | 2  | 98720986  | 0.0006222 | 0.05094  | 0.0005566 | VWA3B(0)                       |
| rs880530   | 16 | 66545106  | 0.0006223 | 0.04345  | 0.0006533 | TK2(0)                         |
| rs9634548  | 13 | 106147933 | 0.0006223 | 0.1171   | 0.0008792 | DAOA(+4.55kb)                  |
| rs11203105 | 10 | 91153477  | 0.0006227 | -0.04708 | 0.0006074 | IFIT1L(+8.515kb) IFIT1(0)      |
| rs12244363 | 10 | 20783766  | 0.0006232 | -0.1495  | 0.0006317 | .                              |
| rs12255866 | 10 | 20782438  | 0.0006232 | -0.1495  | 0.0006317 | .                              |
| rs10944288 | 6  | 87651742  | 0.0006234 | 0.04545  | 0.0006323 | HTR1E(0)                       |
| rs11203070 | 10 | 91091414  | 0.0006236 | -0.04877 | 0.0006139 | IFIT3(0)                       |
| rs1372626  | 18 | 49997807  | 0.0006239 | -0.04312 | 0.0006974 | DCC(0)                         |
| rs1232975  | 12 | 47965375  | 0.0006241 | 0.04389  | 0.0005822 | .                              |
| rs57100184 | 1  | 47004710  | 0.0006242 | 0.05075  | 0.0007367 | MKNK1(-18.38kb) KNCN(-6.605kb) |
| rs12319659 | 12 | 76085094  | 0.0006244 | 0.05076  | 0.0006128 | .                              |
| rs4393645  | 18 | 31394407  | 0.0006248 | -0.04215 | 0.0005279 | .                              |
| rs3762132  | 14 | 94834575  | 0.0006249 | 0.04233  | 0.0006413 | SERPINA1(-8.508kb)             |
| rs17805303 | 2  | 57531366  | 0.000625  | -0.06127 | 0.0005072 | .                              |
| rs762171   | 21 | 33584177  | 0.000625  | 0.04367  | 0.0006175 | .                              |
| rs7072563  | 10 | 87240124  | 0.0006252 | -0.04764 | 0.0006976 | .                              |
| rs2074488  | 6  | 31240431  | 0.0006253 | -0.05909 | 0.0007497 | HLA-C(+0.576kb)                |
| rs9886723  | 9  | 4560454   | 0.0006258 | -0.05036 | 0.0006503 | SLC1A1(0)                      |
| rs61173647 | 11 | 98530873  | 0.000626  | 0.05804  | 0.0006033 | .                              |
| rs58936824 | 17 | 71061298  | 0.000627  | -0.108   | 0.0006518 | SLC39A11(0)                    |
| rs7827446  | 8  | 52233408  | 0.000627  | 0.0477   | 0.0007749 | PXDNL(0)                       |
| rs1781268  | 9  | 8234114   | 0.0006271 | 0.05887  | 0.0006447 | .                              |
| rs4665465  | 2  | 29758708  | 0.0006272 | -0.06821 | 0.000653  | ALK(0)                         |
| rs4666236  | 2  | 29759240  | 0.0006272 | -0.06821 | 0.000653  | ALK(0)                         |
| rs11729482 | 4  | 58389966  | 0.0006279 | -0.05328 | 0.000591  | .                              |
| rs61124236 | 8  | 66481105  | 0.0006289 | -0.05983 | 0.0005529 | .                              |
| rs4256624  | 8  | 117760323 | 0.0006292 | 0.06343  | 0.0006193 | UTP23(-18.42kb) EIF3H(0)       |
| rs11493799 | 11 | 98548134  | 0.0006296 | 0.05923  | 0.0005704 | .                              |
| rs11966716 | 6  | 31235265  | 0.0006299 | -0.05932 | 0.0007732 | HLA-C(-1.263kb)                |
| rs17055345 | 4  | 170906940 | 0.0006305 | -0.07577 | 0.0008029 | MFAP3L(-0.807kb)               |
| rs7814631  | 8  | 140811743 | 0.0006308 | -0.04353 | 0.0006628 | NIBP(0)                        |

|            |    |           |           |          |           |                             |
|------------|----|-----------|-----------|----------|-----------|-----------------------------|
| rs4645549  | 8  | 52213702  | 0.0006309 | 0.04766  | 0.0007582 | PXDNL(-18.43kb)             |
| rs13382421 | 2  | 179160785 | 0.0006313 | 0.04264  | 0.000614  | OSBPL6(0)                   |
| rs17198616 | 6  | 31247964  | 0.0006318 | -0.06001 | 0.0007629 | HLA-C(+8.109kb)             |
| rs11216301 | 11 | 98514146  | 0.000632  | 0.04169  | 0.000563  | .                           |
| rs1254986  | 10 | 43499481  | 0.000632  | 0.05342  | 0.0006829 | .                           |
| rs11164585 | 1  | 103171943 | 0.0006321 | 0.0666   | 0.000517  | .                           |
| rs7552086  | 1  | 24488450  | 0.0006321 | -0.04536 | 0.0007828 | IL28RA(0) IL22RA1(+18.84kb) |
| rs12675074 | 8  | 117798038 | 0.0006324 | 0.04993  | 0.000565  | UTP23(+13.84kb)             |
| rs1895175  | 5  | 162803569 | 0.0006326 | 0.0505   | 0.0004904 | .                           |
| rs12022521 | 1  | 103163844 | 0.0006329 | 0.08893  | 0.0004866 | .                           |
| rs12699388 | 7  | 12536336  | 0.0006329 | -0.06318 | 0.0006294 | .                           |
| rs10497996 | 2  | 213997865 | 0.0006331 | 0.04348  | 0.0006497 | IKZF2(0)                    |
| rs2371795  | 2  | 213994789 | 0.0006331 | 0.04348  | 0.0006497 | IKZF2(0)                    |
| rs4673728  | 2  | 214001997 | 0.0006331 | 0.04348  | 0.0006497 | IKZF2(0)                    |
| rs6996990  | 8  | 118463675 | 0.0006343 | 0.04496  | 0.0006738 | .                           |
| rs36067983 | 4  | 188189540 | 0.0006344 | -0.173   | 0.000679  | .                           |
| rs60924123 | 20 | 24377566  | 0.0006344 | 0.04349  | 0.0006201 | .                           |
| rs7554310  | 1  | 224849358 | 0.0006345 | -0.04845 | 0.0006111 | CNIH3(0)                    |
| rs7623663  | 3  | 148941958 | 0.0006354 | -0.07506 | 0.0006932 | CP(+2.126kb)                |
| rs1992395  | 2  | 214003871 | 0.0006357 | 0.04348  | 0.0006509 | IKZF2(0)                    |
| rs4744505  | 9  | 93579997  | 0.0006357 | 0.04524  | 0.0007792 | SYK(0)                      |
| rs4401874  | 8  | 51557286  | 0.0006364 | 0.06221  | 0.0006545 | SNTG1(0)                    |
| rs4601323  | 8  | 51557226  | 0.0006364 | 0.06221  | 0.0006545 | SNTG1(0)                    |
| rs7777794  | 7  | 5154281   | 0.0006375 | -0.05422 | 0.0008472 | .                           |
| rs2469     | 6  | 43299323  | 0.0006379 | 0.04092  | 0.0006811 | ZNF318(-4.484kb)            |
| rs1985130  | 13 | 50259987  | 0.0006384 | -0.0436  | 0.000628  | KPNA3(-13.47kb) EBPL(0)     |
| rs6803431  | 3  | 170512840 | 0.0006384 | 0.04343  | 0.0005635 | .                           |
| rs7283647  | 21 | 33582250  | 0.0006384 | 0.05388  | 0.0006441 | .                           |
| rs11012155 | 10 | 20854811  | 0.0006386 | -0.1493  | 0.0006168 | .                           |
| rs574401   | 3  | 170473131 | 0.0006387 | 0.05333  | 0.0005357 | .                           |
| rs59943655 | 11 | 36422532  | 0.0006389 | 0.08617  | 0.0005507 | FLJ14213(0)                 |
| rs945346   | 14 | 33460064  | 0.0006395 | 0.05593  | 0.0006239 | NPAS3(0)                    |
| rs1994952  | 8  | 15242806  | 0.0006399 | 0.04909  | 0.0006195 | .                           |
| rs1279199  | 14 | 33468430  | 0.00064   | 0.05621  | 0.0006249 | NPAS3(0)                    |
| rs1845018  | 2  | 80998961  | 0.00064   | 0.04343  | 0.0007266 | .                           |
| rs13292094 | 9  | 26690708  | 0.0006401 | -0.05713 | 0.0007526 | .                           |
| rs11933716 | 4  | 81447179  | 0.0006404 | -0.06263 | 0.0007402 | C4orf22(0)                  |
| rs12486818 | 3  | 170795203 | 0.0006408 | -0.07284 | 0.0007376 | TNIK(0)                     |
| rs56020647 | 11 | 1728170   | 0.000641  | 0.09687  | 0.000638  | KRTAP5-6(+9.185kb) HCCA2(0) |
| rs4602112  | 18 | 31370210  | 0.0006411 | -0.04245 | 0.0005898 | .                           |
| rs2494738  | 14 | 105246686 | 0.0006413 | -0.08154 | 0.0007562 | AKT1(0)                     |
| rs11705329 | 22 | 32135812  | 0.0006414 | 0.07818  | 0.0007187 | DEPDC5(-14.26kb)            |
| rs136745   | 22 | 45928841  | 0.0006416 | 0.06422  | 0.000604  | FBLN1(0)                    |
| rs11216074 | 11 | 98462325  | 0.0006417 | 0.04803  | 0.0006013 | .                           |
| rs2377110  | 3  | 184499620 | 0.0006421 | -0.04211 | 0.0005483 | .                           |
| rs7525074  | 1  | 184681081 | 0.0006421 | 0.0419   | 0.0007783 | EDEM3(0)                    |
| rs2156403  | 21 | 37340961  | 0.0006422 | 0.04237  | 0.0005256 | .                           |

|            |    |           |           |          |           |                                  |
|------------|----|-----------|-----------|----------|-----------|----------------------------------|
| rs2714647  | 7  | 79332497  | 0.0006425 | -0.04256 | 0.0006845 | .                                |
| rs1868065  | 3  | 63063240  | 0.0006426 | -0.1019  | 0.0005976 | .                                |
| rs6875415  | 5  | 8915339   | 0.0006426 | 0.04438  | 0.000537  | .                                |
| rs530726   | 7  | 138645349 | 0.0006427 | 0.05008  | 0.0007541 | .                                |
| rs2963799  | 5  | 3790765   | 0.0006434 | 0.08669  | 0.000653  | .                                |
| rs12111586 | 7  | 126044791 | 0.0006438 | 0.1386   | 0.0007245 | .                                |
| rs10887953 | 10 | 91148642  | 0.000644  | -0.04651 | 0.0006565 | IFIT1L(+3.68kb) IFIT1(-3.679kb)  |
| rs7232237  | 18 | 31324934  | 0.000644  | -0.04225 | 0.0005616 | ASXL3(0)                         |
| rs1586987  | 18 | 31338661  | 0.0006442 | -0.04263 | 0.0005879 | ASXL3(+11.26kb)                  |
| rs6837722  | 4  | 6059192   | 0.0006447 | -0.06119 | 0.0007647 | JAKMIP1(0)                       |
| rs9714219  | 3  | 41604647  | 0.0006451 | 0.05515  | 0.000637  | ULK4(0)                          |
| rs12980791 | 19 | 18808954  | 0.0006454 | 0.07126  | 0.0005317 | CRTC1(0)                         |
| rs2524176  | 6  | 30427293  | 0.0006455 | -0.05844 | 0.0007302 | .                                |
| rs7605095  | 2  | 212308833 | 0.0006455 | -0.04249 | 0.0009118 | ERBB4(0)                         |
| rs2158093  | 5  | 95029221  | 0.0006456 | -0.04202 | 0.0006641 | SPATA9(+10.51kb)                 |
| rs12968891 | 18 | 57137395  | 0.000646  | 0.1767   | 0.000758  | CCBE1(0)                         |
| rs6983490  | 8  | 54452352  | 0.0006462 | -0.09595 | 0.0005457 | .                                |
| rs6987393  | 8  | 54452261  | 0.0006462 | -0.09595 | 0.0005457 | .                                |
| rs9644689  | 8  | 11677805  | 0.0006463 | -0.05747 | 0.0006523 | FDFT1(0)                         |
| rs62238888 | 22 | 32158421  | 0.0006465 | 0.08314  | 0.0006972 | DEPDC5(0)                        |
| rs9558568  | 13 | 106132219 | 0.000647  | 0.0453   | 0.0008538 | DAOA(0)                          |
| rs1264622  | 6  | 30256936  | 0.0006471 | 0.05592  | 0.0007506 | .                                |
| rs7972305  | 12 | 92810294  | 0.0006475 | -0.07463 | 0.0008076 | CLLU1(-7.44kb) CLLU1OS(-3.575kb) |
| rs7184321  | 16 | 77992688  | 0.0006476 | -0.07115 | 0.0006453 | KIAA1576(0)                      |
| rs17105048 | 1  | 81031984  | 0.0006487 | -0.1003  | 0.0006381 | .                                |
| rs34662182 | 11 | 86159223  | 0.0006489 | -0.07984 | 0.0007906 | ME3(0)                           |
| rs2039251  | 21 | 19749506  | 0.0006492 | 0.07161  | 0.000604  | PRSS7(0)                         |
| rs1267303  | 1  | 46990457  | 0.0006496 | 0.04771  | 0.0006499 | DMBX1(+10.57kb)                  |
| rs11084698 | 19 | 33534174  | 0.0006499 | -0.05318 | 0.0006038 | RHPN2(0)                         |
| rs12461135 | 19 | 33534185  | 0.0006499 | -0.05318 | 0.0006038 | RHPN2(0)                         |
| rs12248331 | 10 | 91095752  | 0.0006501 | -0.04851 | 0.0006339 | IFIT3(0)                         |
| rs11203109 | 10 | 91157159  | 0.0006508 | -0.04675 | 0.0006265 | IFIT1L(+12.2kb) IFIT5(-17.28kb)  |
| rs55839643 | 8  | 26030580  | 0.000651  | 0.04541  | 0.0005489 | .                                |
| rs729102   | 1  | 86363292  | 0.000651  | -0.1547  | 0.00062   | COL24A1(0)                       |
| rs12135746 | 1  | 213081440 | 0.0006516 | -0.05066 | 0.0006586 | FLVCR1(+12.68kb)                 |
| rs269219   | 7  | 140277864 | 0.000652  | -0.04177 | 0.0008242 | DENND2A(0)                       |
| rs17132308 | 11 | 98522257  | 0.0006528 | 0.05324  | 0.0005865 | .                                |
| rs7933695  | 11 | 98515924  | 0.0006528 | 0.05324  | 0.0005865 | .                                |
| rs7933799  | 11 | 98515978  | 0.0006528 | 0.05324  | 0.0005865 | .                                |
| rs7946768  | 11 | 98516029  | 0.0006528 | 0.05324  | 0.0005865 | .                                |
| rs6943330  | 7  | 156540956 | 0.0006555 | 0.06052  | 0.000568  | LMBR1(0)                         |
| rs12408462 | 1  | 54626640  | 0.0006556 | -0.1352  | 0.0006651 | LOC606495(-11.39kb) CDCP2(+7.197 |
| rs8066344  | 17 | 67897267  | 0.0006558 | -0.056   | 0.0006984 | .                                |
| rs4892006  | 18 | 64158664  | 0.0006563 | -0.05736 | 0.0008396 | CDH19(-12.66kb)                  |
| rs17748178 | 10 | 27139835  | 0.0006565 | -0.05606 | 0.000771  | ABI1(0)                          |
| rs4859423  | 4  | 77031022  | 0.0006567 | -0.06532 | 0.000628  | NUP54(-4.794kb) ART3(0)          |
| rs12933264 | 16 | 89592338  | 0.0006574 | -0.05754 | 0.0006281 | SPG7(0)                          |



|            |    |           |           |          |           |                        |
|------------|----|-----------|-----------|----------|-----------|------------------------|
| rs1123127  | 7  | 125983840 | 0.0006575 | 0.1341   | 0.0007583 | .                      |
| rs6473267  | 8  | 51562835  | 0.000658  | 0.0614   | 0.0006396 | SNTG1(0)               |
| rs1243173  | 14 | 94836298  | 0.0006581 | 0.04214  | 0.000657  | SERPINA1(-6.785kb)     |
| rs4951650  | 1  | 213080553 | 0.0006587 | -0.05059 | 0.000667  | FLVCR1(+11.8kb)        |
| rs62026636 | 15 | 91822517  | 0.0006589 | -0.06403 | 0.0006777 | SV2B(0)                |
| rs17076243 | 18 | 64066158  | 0.0006592 | -0.054   | 0.0008273 | .                      |
| rs1031250  | 3  | 63066703  | 0.0006594 | -0.1022  | 0.0006051 | .                      |
| rs1348933  | 3  | 63064991  | 0.0006594 | -0.1022  | 0.0006051 | .                      |
| rs1348934  | 3  | 63064011  | 0.0006594 | -0.1022  | 0.0006051 | .                      |
| rs1447423  | 3  | 63070262  | 0.0006594 | -0.1022  | 0.0006051 | .                      |
| rs2053760  | 3  | 63066483  | 0.0006594 | -0.1022  | 0.0006051 | .                      |
| rs4267638  | 3  | 63071090  | 0.0006594 | -0.1022  | 0.0006051 | .                      |
| rs4688364  | 3  | 63067967  | 0.0006594 | -0.1022  | 0.0006051 | .                      |
| rs9576415  | 13 | 38591739  | 0.0006595 | -0.0607  | 0.0007592 | .                      |
| rs13282363 | 8  | 27079609  | 0.0006596 | -0.05053 | 0.0005918 | STMN4(-14.2kb)         |
| rs10873734 | 1  | 86372395  | 0.0006601 | 0.04651  | 0.0006496 | COL24A1(0)             |
| rs10210144 | 2  | 231450980 | 0.0006605 | -0.05207 | 0.0008909 | .                      |
| rs2429996  | 7  | 140280240 | 0.0006609 | -0.04165 | 0.0009035 | DENND2A(0)             |
| rs4459449  | 13 | 71904139  | 0.000661  | -0.1052  | 0.0005726 | .                      |
| rs943462   | 6  | 33769578  | 0.0006616 | -0.05125 | 0.0006643 | MLN(0) LEMD2(+12.68kb) |
| rs13031103 | 2  | 162678313 | 0.0006623 | -0.1265  | 0.0007293 | SLC4A10(0)             |
| rs56833933 | 8  | 54516531  | 0.0006632 | 0.04601  | 0.0005559 | .                      |
| rs6747059  | 2  | 5349080   | 0.0006632 | -0.0955  | 0.0007342 | .                      |
| rs56872451 | 3  | 170815332 | 0.0006634 | -0.07426 | 0.0007094 | TNIK(0)                |
| rs9861146  | 3  | 18117085  | 0.0006635 | 0.05836  | 0.000674  | .                      |
| rs10109724 | 8  | 40787440  | 0.0006637 | -0.04489 | 0.000779  | .                      |
| rs17011949 | 1  | 208281347 | 0.0006637 | -0.04251 | 0.0007844 | PLXNA2(0)              |
| rs11740245 | 5  | 169937406 | 0.0006644 | -0.04354 | 0.0005842 | KCNIP1(0)              |
| rs56115087 | 17 | 71660771  | 0.0006654 | 0.07537  | 0.0006452 | .                      |
| rs9425338  | 1  | 184646229 | 0.0006662 | -0.04206 | 0.0008589 | EDEM3(-13.39kb)        |
| rs61594879 | 15 | 91818278  | 0.0006675 | -0.06439 | 0.0007293 | SV2B(0)                |
| rs9932049  | 16 | 81995553  | 0.0006688 | 0.1005   | 0.000897  | PLCG2(+3.654kb)        |
| rs2454269  | 6  | 92560297  | 0.0006689 | -0.05587 | 0.0006625 | .                      |
| rs12462077 | 19 | 33529231  | 0.000669  | -0.05332 | 0.000649  | RHPN2(0)               |
| rs17809737 | 4  | 124561823 | 0.0006691 | 0.04514  | 0.0006654 | .                      |
| rs9558567  | 13 | 106131594 | 0.0006691 | -0.07818 | 0.0008881 | DAOA(0)                |
| rs11088212 | 21 | 33584936  | 0.0006694 | 0.04341  | 0.0006665 | .                      |
| rs9566294  | 13 | 38629177  | 0.0006698 | -0.06134 | 0.000765  | .                      |
| rs4495403  | 8  | 77945543  | 0.0006701 | 0.04304  | 0.000648  | .                      |
| rs13185077 | 5  | 174199283 | 0.0006702 | -0.05433 | 0.0007095 | .                      |
| rs10038794 | 5  | 124236123 | 0.0006703 | -0.0476  | 0.0006163 | .                      |
| rs35265712 | 10 | 87245948  | 0.0006703 | 0.04288  | 0.0007367 | .                      |
| rs4808399  | 19 | 15981912  | 0.0006703 | -0.06752 | 0.000747  | CYP4F2(-6.921kb)       |
| rs2749529  | 14 | 94820459  | 0.0006705 | -0.04374 | 0.0006971 | .                      |
| rs730204   | 10 | 91385078  | 0.0006705 | 0.04153  | 0.0007371 | PANK1(0)               |
| rs11133504 | 4  | 58380322  | 0.0006716 | -0.05238 | 0.0006167 | .                      |
| rs11216260 | 11 | 98504332  | 0.0006727 | 0.05686  | 0.0006547 | .                      |

|            |    |           |           |          |           |                                  |
|------------|----|-----------|-----------|----------|-----------|----------------------------------|
| rs6780366  | 3  | 189931056 | 0.0006727 | 0.06383  | 0.0006561 | .                                |
| rs6793394  | 3  | 189931067 | 0.0006727 | 0.06383  | 0.0006561 | .                                |
| rs61980344 | 14 | 33471396  | 0.000673  | 0.05351  | 0.0006696 | NPAS3(0)                         |
| rs2111802  | 13 | 106152620 | 0.0006731 | 0.04299  | 0.0009174 | DAOA(+9.237kb)                   |
| rs11977402 | 7  | 126002487 | 0.0006734 | 0.04501  | 0.000776  | .                                |
| rs12583219 | 13 | 106134989 | 0.0006734 | 0.1339   | 0.0009103 | DAOA(0)                          |
| rs60662311 | 7  | 125994866 | 0.0006734 | 0.1339   | 0.000776  | .                                |
| rs6943914  | 7  | 126016455 | 0.0006734 | 0.1339   | 0.000776  | .                                |
| rs7800448  | 7  | 126008930 | 0.0006734 | 0.1339   | 0.000776  | .                                |
| rs12792831 | 11 | 99860225  | 0.0006739 | 0.04252  | 0.0006741 | CNTN5(0)                         |
| rs7009078  | 8  | 65659136  | 0.0006747 | -0.04988 | 0.0007384 | CYP7B1(0)                        |
| rs9608462  | 22 | 26528017  | 0.000675  | -0.08652 | 0.0006332 | .                                |
| rs10186600 | 2  | 81001174  | 0.0006752 | 0.04347  | 0.0007405 | .                                |
| rs4736008  | 8  | 140822965 | 0.0006759 | -0.04109 | 0.0007589 | NIBP(0)                          |
| rs60471430 | 8  | 11655911  | 0.000676  | -0.05459 | 0.0007385 | NEIL2(+11.06kb) FDFT1(-4.278kb)  |
| rs12464620 | 2  | 29759715  | 0.0006767 | -0.06771 | 0.0007016 | ALK(0)                           |
| rs35556213 | 6  | 31234131  | 0.0006771 | -0.05903 | 0.0008334 | HLA-C(-2.397kb)                  |
| rs7011491  | 8  | 11674137  | 0.0006774 | -0.05747 | 0.0006899 | FDFT1(0)                         |
| rs5753488  | 22 | 31561718  | 0.0006779 | 0.09006  | 0.0006862 | RNF185(0)                        |
| rs9367622  | 6  | 55069173  | 0.0006779 | -0.05858 | 0.0007014 | HCRTR2(0)                        |
| rs59402064 | 2  | 5388575   | 0.0006782 | 0.04533  | 0.0007303 | .                                |
| rs1506443  | 3  | 97537674  | 0.0006784 | -0.04447 | 0.0007388 | .                                |
| rs17646132 | 5  | 133131129 | 0.0006787 | -0.07716 | 0.0006607 | .                                |
| rs10974624 | 9  | 4561374   | 0.0006799 | -0.04278 | 0.0007108 | SLC1A1(0)                        |
| rs12307265 | 12 | 114069474 | 0.0006799 | -0.04951 | 0.0005998 | .                                |
| rs1781274  | 9  | 8235337   | 0.00068   | 0.05824  | 0.0006822 | .                                |
| rs28390973 | 6  | 31579740  | 0.0006808 | 0.1285   | 0.0007454 | NCR3(+18.98kb) BAT2(-8.709kb) AI |
| rs8031230  | 15 | 94353018  | 0.0006811 | 0.04104  | 0.0007903 | .                                |
| rs6046400  | 20 | 19859126  | 0.0006812 | -0.05489 | 0.0007227 | RIN2(-11.08kb)                   |
| rs3794632  | 16 | 89617064  | 0.0006814 | -0.05465 | 0.0006572 | SPG7(0) RPL13(-10.03kb)          |
| rs9902187  | 17 | 41704419  | 0.0006816 | 0.1988   | 0.0006968 | MEOX1(-13.34kb)                  |
| rs9913085  | 17 | 41704420  | 0.0006816 | 0.1988   | 0.0006968 | MEOX1(-13.34kb)                  |
| rs35347396 | 1  | 105290910 | 0.0006817 | -0.08096 | 0.0006236 | .                                |
| rs7827180  | 8  | 118461527 | 0.0006817 | 0.04457  | 0.0007099 | .                                |
| rs61814069 | 1  | 105291134 | 0.0006819 | -0.08099 | 0.000621  | .                                |
| rs60218999 | 8  | 5660906   | 0.0006822 | 0.1399   | 0.0007377 | .                                |
| rs8127678  | 21 | 33585818  | 0.0006824 | 0.04334  | 0.0006788 | .                                |
| rs28521075 | 3  | 170509573 | 0.0006829 | 0.05271  | 0.0005938 | .                                |
| rs6599158  | 3  | 41545321  | 0.000683  | 0.05002  | 0.0007445 | ULK4(0)                          |
| rs13081275 | 3  | 63050763  | 0.0006839 | -0.04509 | 0.0006316 | .                                |
| rs1447430  | 3  | 63052912  | 0.0006839 | -0.1015  | 0.0006316 | .                                |
| rs1447431  | 3  | 63052176  | 0.0006839 | -0.1015  | 0.0006316 | .                                |
| rs1447432  | 3  | 63052063  | 0.0006839 | -0.1015  | 0.0006316 | .                                |
| rs7091083  | 10 | 123024757 | 0.0006839 | -0.1015  | 0.0006163 | .                                |
| rs3846218  | 3  | 63058649  | 0.0006843 | -0.1015  | 0.0006296 | .                                |
| rs6445314  | 3  | 63060370  | 0.0006843 | -0.1015  | 0.0006296 | .                                |
| rs7614151  | 3  | 63056232  | 0.0006843 | -0.1015  | 0.0006296 | .                                |

|            |    |           |           |          |           |                                   |
|------------|----|-----------|-----------|----------|-----------|-----------------------------------|
| rs11133502 | 4  | 58380033  | 0.0006846 | -0.05226 | 0.0006334 | .                                 |
| rs11728064 | 4  | 58379453  | 0.0006846 | -0.05226 | 0.0006334 | .                                 |
| rs261134   | 5  | 4314418   | 0.0006846 | -0.05226 | 0.0006506 | .                                 |
| rs6554475  | 4  | 58381168  | 0.0006846 | -0.04201 | 0.0006334 | .                                 |
| rs1282619  | 18 | 68423902  | 0.0006847 | 0.04726  | 0.0007864 | .                                 |
| rs13130116 | 4  | 77025840  | 0.000685  | -0.06492 | 0.0006611 | NUP54(-9.976kb) ART3(0)           |
| rs57239050 | 5  | 174190528 | 0.000685  | -0.05672 | 0.0007093 | .                                 |
| rs1105221  | 9  | 140450159 | 0.0006853 | 0.05026  | 0.0005696 | WDR85(0) PNPLA7(+5.173kb) MRPL41  |
| rs10879957 | 12 | 76064345  | 0.0006854 | -0.0425  | 0.0007796 | .                                 |
| rs6994693  | 8  | 52206271  | 0.0006854 | 0.04846  | 0.0007833 | .                                 |
| rs12680346 | 8  | 140814379 | 0.0006856 | -0.04122 | 0.0008888 | NIBP(0)                           |
| rs1865325  | 2  | 179161346 | 0.0006859 | 0.04226  | 0.0006921 | OSBPL6(0)                         |
| rs11704362 | 22 | 32140379  | 0.0006863 | 0.1127   | 0.0007624 | DEPDC5(-9.689kb)                  |
| rs136733   | 22 | 45924112  | 0.0006863 | 0.0778   | 0.0006581 | FBLN1(0)                          |
| rs36054769 | 10 | 130020127 | 0.0006863 | 0.0778   | 0.0005894 | .                                 |
| rs5998113  | 22 | 32143243  | 0.0006863 | 0.0778   | 0.0007624 | DEPDC5(-6.825kb)                  |
| rs62240515 | 22 | 32134214  | 0.0006863 | 0.06879  | 0.0007624 | DEPDC5(-15.85kb)                  |
| rs62026635 | 15 | 91821342  | 0.0006868 | -0.06383 | 0.0007049 | SV2B(0)                           |
| rs3892526  | 4  | 6058301   | 0.0006878 | -0.06174 | 0.0008228 | JAKMIP1(0)                        |
| rs12598459 | 16 | 15532504  | 0.0006879 | 0.07135  | 0.000734  | C16orf45(0)                       |
| rs16919301 | 8  | 54454601  | 0.0006881 | -0.09583 | 0.0005767 | .                                 |
| rs2376141  | 8  | 54454779  | 0.0006881 | -0.09583 | 0.0005767 | .                                 |
| rs4300035  | 8  | 54454772  | 0.0006881 | -0.09583 | 0.0005767 | .                                 |
| rs12619209 | 2  | 176929979 | 0.0006882 | -0.1438  | 0.0005806 | EVX2(-14.86kb)                    |
| rs10078034 | 5  | 8437956   | 0.0006885 | -0.1548  | 0.0006591 | .                                 |
| rs55972520 | 11 | 7956354   | 0.0006889 | 0.06014  | 0.0007184 | OR10A6(+6.145kb) OR10A3(-3.768kb) |
| rs7007788  | 8  | 54459084  | 0.000689  | -0.09523 | 0.000572  | .                                 |
| rs4258608  | 16 | 81971582  | 0.0006896 | 0.04706  | 0.0008117 | PLCG2(0)                          |
| rs7917702  | 10 | 87771207  | 0.0006898 | 0.09302  | 0.0006514 | GRID1(0)                          |
| rs9861342  | 3  | 112340843 | 0.0006902 | -0.04182 | 0.0008184 | CCDC80(0)                         |
| rs6366     | 16 | 2014031   | 0.0006908 | 0.05409  | 0.0007453 | TBL3(-8.032kb) RPS2(0) RPL3L(+9.  |
| rs12699879 | 7  | 17624226  | 0.0006912 | 0.04571  | 0.0007188 | .                                 |
| rs1403603  | 3  | 189920271 | 0.0006917 | 0.06395  | 0.0006627 | .                                 |
| rs10063659 | 5  | 8440627   | 0.0006929 | -0.1546  | 0.0006725 | .                                 |
| rs60409864 | 11 | 126430657 | 0.0006956 | 0.05542  | 0.000762  | KIRREL3(0)                        |
| rs10451871 | 3  | 156953853 | 0.0006957 | -0.04407 | 0.000711  | .                                 |
| rs1486015  | 4  | 81454754  | 0.0006965 | -0.06832 | 0.00083   | C4orf22(0)                        |
| rs12672646 | 7  | 25545534  | 0.0006969 | 0.05714  | 0.0005681 | .                                 |
| rs1393675  | 7  | 25542680  | 0.0006969 | 0.05714  | 0.0005681 | .                                 |
| rs10042476 | 5  | 160585904 | 0.0006972 | -0.07513 | 0.0006805 | .                                 |
| rs12255508 | 10 | 93109660  | 0.0006976 | 0.1897   | 0.000703  | .                                 |
| rs4133068  | 3  | 170490416 | 0.000698  | 0.05368  | 0.0005777 | .                                 |
| rs2495975  | 6  | 33944014  | 0.0006986 | 0.04974  | 0.0007913 | .                                 |
| rs1436656  | 3  | 189948689 | 0.0006987 | 0.06284  | 0.0006753 | .                                 |
| rs1436657  | 3  | 189948706 | 0.0006987 | 0.06284  | 0.0006753 | .                                 |
| rs4687128  | 3  | 189950023 | 0.0006987 | 0.06284  | 0.0006753 | .                                 |
| rs7617032  | 3  | 189949214 | 0.0006987 | 0.06284  | 0.0006753 | .                                 |

|            |    |           |           |          |           |                                   |
|------------|----|-----------|-----------|----------|-----------|-----------------------------------|
| rs7630711  | 3  | 189950459 | 0.0006987 | 0.06284  | 0.0006753 | .                                 |
| rs7649823  | 3  | 189949307 | 0.0006987 | 0.06284  | 0.0006753 | .                                 |
| rs932018   | 3  | 189949756 | 0.0006987 | 0.06284  | 0.0006753 | .                                 |
| rs35140422 | 13 | 38606988  | 0.0006989 | -0.06033 | 0.0007927 | .                                 |
| rs17011443 | 4  | 127623914 | 0.0006995 | -0.06302 | 0.0008394 | .                                 |
| rs11818588 | 10 | 87247526  | 0.0006999 | -0.04661 | 0.0007719 | .                                 |
| rs2136594  | 10 | 87242681  | 0.0006999 | -0.04661 | 0.0007719 | .                                 |
| rs2175203  | 10 | 87243492  | 0.0006999 | -0.04661 | 0.0007719 | .                                 |
| rs34714659 | 10 | 87240276  | 0.0006999 | -0.04661 | 0.0007719 | .                                 |
| rs6585959  | 10 | 87241243  | 0.0006999 | -0.04661 | 0.0007719 | .                                 |
| rs10085941 | 8  | 117751717 | 0.0007002 | -0.1138  | 0.000674  | EIF3H(0)                          |
| rs1510350  | 3  | 68507768  | 0.0007002 | -0.1138  | 0.0006805 | FAM19A1(0)                        |
| rs4260447  | 3  | 68508137  | 0.0007002 | 0.06254  | 0.0006805 | FAM19A1(0)                        |
| rs1378014  | 2  | 221213711 | 0.0007003 | -0.05469 | 0.0007276 | .                                 |
| rs61813497 | 1  | 177711279 | 0.0007011 | 0.13     | 0.0006345 | .                                 |
| rs7744312  | 6  | 135809256 | 0.0007016 | -0.1041  | 0.0006653 | AHI1(0)                           |
| rs206018   | 6  | 32177880  | 0.0007017 | -0.05439 | 0.0007317 | PBX2(+19.92kb) NOTCH4(0) GPSM3(+) |
| rs397435   | 16 | 2010138   | 0.0007018 | 0.05405  | 0.0007009 | TBL3(-11.93kb) SEPX1(+16.84kb) R  |
| rs4713447  | 6  | 31162963  | 0.0007018 | -0.04158 | 0.0008311 | HCG27(-2.635kb)                   |
| rs10909933 | 1  | 3253703   | 0.0007021 | 0.04775  | 0.0006972 | PRDM16(0)                         |
| rs1572037  | 1  | 3254369   | 0.0007021 | 0.04775  | 0.0006972 | PRDM16(0)                         |
| rs1572038  | 1  | 3254341   | 0.0007021 | 0.04775  | 0.0006972 | PRDM16(0)                         |
| rs7516137  | 1  | 3253839   | 0.0007021 | 0.04775  | 0.0006972 | PRDM16(0)                         |
| rs10493777 | 1  | 86377028  | 0.0007024 | 0.04515  | 0.0006764 | COL24A1(0)                        |
| rs10873736 | 1  | 86385602  | 0.0007024 | 0.04515  | 0.0006764 | COL24A1(0)                        |
| rs1858556  | 1  | 86371149  | 0.0007024 | 0.04515  | 0.0006764 | COL24A1(0)                        |
| rs4146294  | 1  | 86373978  | 0.0007024 | 0.04515  | 0.0006764 | COL24A1(0)                        |
| rs2413058  | 22 | 32129550  | 0.0007025 | 0.07771  | 0.0007761 | .                                 |
| rs2024765  | 1  | 184653541 | 0.0007026 | -0.04128 | 0.0008667 | EDEM3(-6.083kb)                   |
| rs4259436  | 8  | 54466722  | 0.0007032 | -0.09505 | 0.0005872 | .                                 |
| rs8088362  | 18 | 31413016  | 0.0007034 | -0.04174 | 0.0006595 | NOL4(-18.05kb)                    |
| rs6875370  | 5  | 124244591 | 0.0007036 | -0.074   | 0.0005956 | .                                 |
| rs11956273 | 5  | 160575832 | 0.0007039 | -0.07496 | 0.0007104 | .                                 |
| rs17472652 | 2  | 221144573 | 0.0007041 | -0.05519 | 0.0007738 | .                                 |
| rs3136405  | 8  | 95448710  | 0.0007045 | 0.1927   | 0.0005842 | RAD54B(0)                         |
| rs12486849 | 3  | 121725335 | 0.0007057 | 0.07537  | 0.0008243 | ILDR1(0)                          |
| rs11995306 | 8  | 15154405  | 0.0007059 | 0.07989  | 0.0008519 | .                                 |
| rs9787757  | 11 | 129277217 | 0.0007059 | 0.1422   | 0.0007527 | BARX2(0)                          |
| rs17031012 | 2  | 66096120  | 0.000706  | 0.05428  | 0.0008203 | .                                 |
| rs1579540  | 18 | 49076557  | 0.0007061 | -0.1476  | 0.0007369 | .                                 |
| rs2488595  | 9  | 140451611 | 0.0007066 | 0.05019  | 0.0005779 | WDR85(0) PNPLA7(+6.625kb) MRPL41  |
| rs34023488 | 6  | 31270295  | 0.0007068 | -0.05855 | 0.0008602 | .                                 |
| rs7913695  | 10 | 105383070 | 0.0007069 | -0.04122 | 0.0007144 | SH3PXD2A(0)                       |
| rs59009172 | 15 | 91816218  | 0.0007075 | -0.06483 | 0.000755  | SV2B(0)                           |
| rs4688371  | 3  | 63074381  | 0.0007077 | -0.1013  | 0.0006482 | .                                 |
| rs34131062 | 6  | 31236410  | 0.0007079 | -0.05852 | 0.000847  | HLA-C(-0.118kb)                   |
| rs2089756  | 18 | 64118886  | 0.0007081 | -0.05419 | 0.0008838 | .                                 |

|            |    |           |           |          |           |                                 |
|------------|----|-----------|-----------|----------|-----------|---------------------------------|
| rs2493218  | 6  | 19575837  | 0.0007087 | -0.08214 | 0.0006514 | .                               |
| rs1374677  | 3  | 63041182  | 0.0007093 | -0.1011  | 0.0006644 | .                               |
| rs2010923  | 3  | 63033844  | 0.0007093 | -0.1011  | 0.0006644 | .                               |
| rs6445310  | 3  | 63039589  | 0.0007093 | -0.1011  | 0.0006644 | .                               |
| rs7649100  | 3  | 63032249  | 0.0007093 | -0.1011  | 0.0006644 | .                               |
| rs9311856  | 3  | 63032126  | 0.0007093 | -0.1011  | 0.0006644 | .                               |
| rs9895055  | 17 | 71514554  | 0.0007096 | 0.0443   | 0.0008191 | .                               |
| rs129752   | 22 | 45922466  | 0.0007102 | 0.06702  | 0.0007096 | FBLN1(0)                        |
| rs10043880 | 5  | 160584314 | 0.0007105 | -0.07679 | 0.0006786 | .                               |
| rs1939720  | 11 | 134561571 | 0.0007108 | -0.108   | 0.0006399 | .                               |
| rs9886809  | 9  | 4559951   | 0.000711  | -0.04932 | 0.0007662 | SLC1A1(0)                       |
| rs10892089 | 11 | 98523638  | 0.0007111 | 0.05334  | 0.0006394 | .                               |
| rs1791736  | 18 | 20277555  | 0.0007111 | 0.04569  | 0.0006696 | .                               |
| rs1901894  | 2  | 5350415   | 0.0007113 | 0.04669  | 0.0007711 | .                               |
| rs17016014 | 2  | 35244015  | 0.0007114 | -0.04938 | 0.0008317 | .                               |
| rs1347626  | 8  | 117656781 | 0.0007118 | 0.06354  | 0.0006772 | EIF3H(-0.273kb)                 |
| rs3826907  | 19 | 33599246  | 0.0007124 | -0.0694  | 0.0008225 | GPATCH1(0)                      |
| rs6988970  | 8  | 800534    | 0.0007126 | 0.04894  | 0.000716  | .                               |
| rs10797079 | 1  | 160559110 | 0.0007129 | -0.07395 | 0.0008    | CD84(+9.859kb)                  |
| rs3846684  | 5  | 156649132 | 0.000713  | -0.04194 | 0.0008114 | ITK(0)                          |
| rs11579787 | 1  | 223906977 | 0.0007131 | 0.09948  | 0.0006353 | CAPN2(0)                        |
| rs1374683  | 3  | 63049585  | 0.0007135 | -0.1011  | 0.000664  | .                               |
| rs1470540  | 3  | 63048987  | 0.0007135 | -0.1011  | 0.000664  | .                               |
| rs61790743 | 1  | 75224016  | 0.0007146 | -0.1003  | 0.0006475 | TYW3(0)                         |
| rs35094999 | 18 | 3397985   | 0.0007147 | -0.05298 | 0.0006172 | TGIF1(-14.09kb)                 |
| rs11125708 | 2  | 57480818  | 0.0007148 | -0.06204 | 0.0005858 | .                               |
| rs4617634  | 12 | 114076323 | 0.0007157 | 0.04246  | 0.0006343 | .                               |
| rs6112627  | 20 | 19857986  | 0.0007158 | -0.04619 | 0.0007003 | RIN2(-12.22kb)                  |
| rs155352   | 5  | 4321760   | 0.0007159 | -0.04187 | 0.0006933 | .                               |
| rs263761   | 5  | 4321428   | 0.0007159 | -0.04187 | 0.0006933 | .                               |
| rs13400738 | 2  | 179166160 | 0.000716  | 0.04212  | 0.0006778 | OSBPL6(0)                       |
| rs10932535 | 2  | 215271969 | 0.0007161 | 0.05902  | 0.0007639 | SPAG16(0) LOC402117(-4.491kb)   |
| rs12146366 | 10 | 123024680 | 0.0007166 | -0.05215 | 0.0006751 | .                               |
| rs7429891  | 3  | 97647408  | 0.0007175 | -0.04355 | 0.0007216 | MINA(-13.25kb) DKFZp667G2110(0) |
| rs10404631 | 19 | 33527677  | 0.000718  | -0.07573 | 0.0006677 | RHPN2(0)                        |
| rs3867422  | 5  | 133131702 | 0.000718  | -0.0778  | 0.0006551 | .                               |
| rs13345828 | 19 | 33599323  | 0.0007186 | -0.0693  | 0.0008338 | GPATCH1(0)                      |
| rs9944191  | 15 | 24996235  | 0.000719  | -0.04235 | 0.000709  | .                               |
| rs10090141 | 8  | 138005155 | 0.00072   | -0.07511 | 0.0008742 | .                               |
| rs4857301  | 3  | 97657640  | 0.0007202 | -0.04361 | 0.0007209 | MINA(-3.02kb) DKFZp667G2110(0)  |
| rs7798779  | 7  | 12543490  | 0.0007206 | -0.06435 | 0.0007729 | .                               |
| rs3004261  | 10 | 43491592  | 0.000722  | 0.04103  | 0.0007856 | .                               |
| rs1369012  | 13 | 105263427 | 0.0007223 | -0.04466 | 0.0007053 | .                               |
| rs2053759  | 3  | 63073352  | 0.0007223 | -0.1011  | 0.0006648 | .                               |
| rs4688152  | 3  | 63072780  | 0.0007223 | -0.1011  | 0.0006648 | .                               |
| rs4688365  | 3  | 63072839  | 0.0007223 | -0.1011  | 0.0006648 | .                               |
| rs4688366  | 3  | 63072875  | 0.0007223 | -0.1011  | 0.0006648 | .                               |

|            |    |           |           |          |           |                                   |
|------------|----|-----------|-----------|----------|-----------|-----------------------------------|
| rs4688369  | 3  | 63073231  | 0.0007223 | -0.1011  | 0.0006648 | .                                 |
| rs7898877  | 10 | 87236564  | 0.0007229 | -0.04636 | 0.0007989 | .                                 |
| rs61783087 | 1  | 46999955  | 0.0007237 | 0.05015  | 0.0008172 | KNCN(-11.36kb)                    |
| rs12608181 | 18 | 31339351  | 0.0007239 | -0.04226 | 0.0006598 | ASXL3(+11.95kb)                   |
| rs11952127 | 5  | 8904850   | 0.000724  | 0.04316  | 0.0006636 | .                                 |
| rs1129464  | 17 | 9816452   | 0.0007241 | 0.04344  | 0.0006977 | RCVRN(+7.768kb) GAS7(0)           |
| rs1020918  | 1  | 103331349 | 0.0007245 | 0.05345  | 0.0006312 | COL11A1(-10.67kb)                 |
| rs10922378 | 1  | 198187149 | 0.0007245 | 0.07786  | 0.0007962 | NEK7(-14.53kb)                    |
| rs34033251 | 4  | 32800365  | 0.0007248 | 0.04412  | 0.0007134 | .                                 |
| rs4111582  | 1  | 87736382  | 0.0007248 | 0.08865  | 0.0006195 | .                                 |
| rs61792795 | 4  | 32800181  | 0.0007248 | 0.08865  | 0.0007134 | .                                 |
| rs61880768 | 11 | 21009290  | 0.0007248 | 0.04874  | 0.0007604 | NELL1(0)                          |
| rs61880769 | 11 | 21009443  | 0.0007248 | 0.04874  | 0.0007604 | NELL1(0)                          |
| rs935068   | 4  | 58397676  | 0.0007251 | -0.052   | 0.000663  | .                                 |
| rs3736757  | 1  | 184677464 | 0.0007254 | -0.04132 | 0.0008705 | EDEM3(0)                          |
| rs10447447 | 6  | 144149889 | 0.0007264 | -0.05016 | 0.0008079 | PHACTR2(0) LTV1(-14.62kb)         |
| rs6987616  | 8  | 52234145  | 0.0007265 | 0.04799  | 0.0008991 | PXDNL(0)                          |
| rs6498907  | 16 | 63603581  | 0.0007272 | -0.07588 | 0.0008513 | .                                 |
| rs1768576  | 9  | 8235898   | 0.0007276 | 0.06057  | 0.000701  | .                                 |
| rs2451136  | 8  | 119238894 | 0.0007277 | -0.06871 | 0.00063   | SAMD12(0)                         |
| rs61789795 | 1  | 106916082 | 0.0007277 | 0.0887   | 0.0006879 | .                                 |
| rs15814    | 17 | 9816390   | 0.0007278 | 0.04347  | 0.0007029 | RCVRN(+7.706kb) GAS7(0)           |
| rs10460051 | 18 | 31413679  | 0.0007279 | -0.04212 | 0.0006204 | NOL4(-17.38kb)                    |
| rs10876218 | 12 | 52327400  | 0.000728  | -0.04093 | 0.0009486 | ACVRL1(+10.26kb) ACVR1B(-18.09kb) |
| rs11666273 | 19 | 33372601  | 0.0007285 | 0.04252  | 0.0009677 | SLC7A9(+11.92kb) CCDC123(0)       |
| rs12676781 | 8  | 5645359   | 0.0007291 | 0.07056  | 0.0008607 | .                                 |
| rs16986523 | 20 | 24371627  | 0.0007297 | -0.1645  | 0.0006844 | .                                 |
| rs6114685  | 20 | 24372449  | 0.0007297 | -0.1645  | 0.0006844 | .                                 |
| rs6827440  | 4  | 58381544  | 0.0007311 | -0.05201 | 0.0006762 | .                                 |
| rs34853285 | 6  | 144148874 | 0.0007312 | -0.0501  | 0.0008165 | PHACTR2(0) LTV1(-15.63kb)         |
| rs9886847  | 9  | 4560437   | 0.0007317 | -0.04966 | 0.0007646 | SLC1A1(0)                         |
| rs2548136  | 5  | 95026764  | 0.0007319 | -0.04194 | 0.0007005 | SPATA9(+8.05kb)                   |
| rs9792173  | 8  | 138022268 | 0.000732  | -0.07984 | 0.0009081 | .                                 |
| rs9653707  | 21 | 33551774  | 0.0007324 | 0.04156  | 0.0007483 | .                                 |
| rs1599097  | 15 | 29890236  | 0.0007334 | -0.06594 | 0.0007096 | .                                 |
| rs34112404 | 2  | 221187223 | 0.0007334 | -0.05354 | 0.0008496 | .                                 |
| rs7814652  | 8  | 65678678  | 0.000734  | -0.05256 | 0.0007536 | CYP7B1(0)                         |
| rs55962241 | 18 | 57145930  | 0.0007341 | 0.1674   | 0.0008499 | CCBE1(0)                          |
| rs56359247 | 18 | 57145931  | 0.0007341 | 0.1674   | 0.0008499 | CCBE1(0)                          |
| rs1436658  | 3  | 189948864 | 0.0007344 | 0.06319  | 0.000694  | .                                 |
| rs17001409 | 4  | 77029413  | 0.0007345 | -0.06464 | 0.0007066 | NUP54(-6.403kb) ART3(0)           |
| rs61872773 | 10 | 122706511 | 0.0007352 | 0.05293  | 0.0008098 | .                                 |
| rs56211561 | 4  | 170916875 | 0.0007354 | -0.07714 | 0.0009198 | MFAP3L(0)                         |
| rs13259412 | 8  | 51552744  | 0.000736  | 0.06184  | 0.0008242 | SNTG1(0)                          |
| rs4701831  | 5  | 8910497   | 0.0007362 | 0.04379  | 0.0006017 | .                                 |
| rs6705720  | 2  | 215264632 | 0.000737  | 0.05861  | 0.0007851 | SPAG16(0) LOC402117(-11.83kb)     |
| rs4701205  | 5  | 22866453  | 0.0007371 | -0.05639 | 0.0007419 | CDH12(+12.72kb)                   |

|            |    |           |           |          |           |                                  |
|------------|----|-----------|-----------|----------|-----------|----------------------------------|
| rs9907854  | 17 | 67900320  | 0.0007371 | -0.0497  | 0.0007896 | .                                |
| rs11216145 | 11 | 98478731  | 0.0007376 | 0.05644  | 0.000647  | .                                |
| rs56396760 | 4  | 7119516   | 0.0007376 | -0.06848 | 0.00068   | .                                |
| rs1243171  | 14 | 94836784  | 0.0007377 | 0.04183  | 0.0007339 | SERPINA1(-6.299kb)               |
| rs6991825  | 8  | 54502600  | 0.0007381 | 0.04153  | 0.0008165 | .                                |
| rs9288016  | 2  | 179149973 | 0.0007381 | 0.04571  | 0.0007969 | OSBPL6(0)                        |
| rs6988901  | 8  | 77953355  | 0.0007383 | 0.04298  | 0.0007249 | .                                |
| rs12034125 | 1  | 86406369  | 0.0007384 | 0.045    | 0.00072   | COL24A1(0)                       |
| rs9405048  | 6  | 30670292  | 0.0007394 | -0.05815 | 0.0006861 | TUBB(-17.86kb) NRM(+11.52kb) MDC |
| rs9576405  | 13 | 38531753  | 0.00074   | -0.06026 | 0.0008531 | .                                |
| rs755717   | 16 | 66562300  | 0.0007409 | 0.1153   | 0.0007988 | TK2(0)                           |
| rs9357109  | 6  | 31144771  | 0.000741  | -0.0544  | 0.0008818 | TCF19(+12.78kb) POU5F1(+6.32kb)  |
| rs9953034  | 18 | 31335294  | 0.0007419 | -0.04145 | 0.000652  | ASXL3(+7.895kb)                  |
| rs55948812 | 11 | 7955629   | 0.0007427 | 0.05972  | 0.0007762 | OR10A6(+5.42kb) OR10A3(-4.493kb) |
| rs7811374  | 7  | 12517437  | 0.0007433 | -0.0612  | 0.0007675 | .                                |
| rs16971252 | 15 | 79987725  | 0.0007434 | -0.08461 | 0.0009424 | .                                |
| rs4122189  | 6  | 31167927  | 0.0007435 | -0.0509  | 0.0008222 | HCG27(0)                         |
| rs4951652  | 1  | 213082169 | 0.0007437 | -0.05054 | 0.000727  | FLVCR1(+13.41kb)                 |
| rs58396176 | 7  | 156524161 | 0.0007438 | 0.06178  | 0.0006591 | LMBR1(0)                         |
| rs943461   | 6  | 33769409  | 0.0007444 | -0.05077 | 0.0007429 | MLN(0) LEMD2(+12.51kb)           |
| rs2994968  | 1  | 241603554 | 0.0007447 | -0.08189 | 0.0007256 | .                                |
| rs6685088  | 1  | 146708167 | 0.0007447 | 0.04581  | 0.0009361 | FMO5(+11.24kb) CHD1L(-6.123kb)   |
| rs55915919 | 5  | 56818832  | 0.0007451 | -0.09551 | 0.0007643 | .                                |
| rs3737846  | 1  | 146727593 | 0.0007457 | -0.0814  | 0.0009469 | CHD1L(0)                         |
| rs6556880  | 5  | 95124858  | 0.0007459 | -0.0419  | 0.0007555 | RHOBTB3(0)                       |
| rs955013   | 3  | 153099036 | 0.0007466 | 0.04289  | 0.0008073 | .                                |
| rs1447434  | 3  | 63045504  | 0.0007467 | -0.1006  | 0.0007018 | .                                |
| rs1447435  | 3  | 63045212  | 0.0007467 | -0.1006  | 0.0007018 | .                                |
| rs4688362  | 3  | 63047410  | 0.0007467 | -0.1006  | 0.0007018 | .                                |
| rs9837096  | 3  | 63047581  | 0.0007467 | -0.1006  | 0.0007018 | .                                |
| rs2552035  | 2  | 36507300  | 0.0007469 | 0.04225  | 0.0005779 | .                                |
| rs4870913  | 8  | 125631281 | 0.0007469 | 0.05403  | 0.0007505 | MTSS1(0)                         |
| rs993466   | 2  | 66095378  | 0.0007469 | -0.06065 | 0.0008645 | .                                |
| rs7233654  | 18 | 57132339  | 0.0007476 | 0.1967   | 0.0008229 | CCBE1(0)                         |
| rs6473848  | 8  | 54457570  | 0.0007479 | -0.09458 | 0.0006264 | .                                |
| rs62249123 | 3  | 60611268  | 0.0007483 | -0.06236 | 0.0007785 | FHIT(0)                          |
| rs1187237  | 18 | 35345062  | 0.0007503 | 0.1265   | 0.0007942 | .                                |
| rs4854139  | 2  | 3213676   | 0.0007504 | -0.1162  | 0.0009092 | TSSC1(0)                         |
| rs540495   | 3  | 170470660 | 0.0007506 | 0.05282  | 0.0006387 | .                                |
| rs2202521  | 18 | 5151205   | 0.0007521 | 0.04926  | 0.0008593 | .                                |
| rs1454542  | 2  | 221204882 | 0.0007525 | -0.05346 | 0.0008715 | .                                |
| rs11216427 | 11 | 98547202  | 0.0007532 | 0.05929  | 0.0006467 | .                                |
| rs427546   | 18 | 20280271  | 0.0007533 | 0.04559  | 0.0007163 | .                                |
| rs11811514 | 1  | 116826512 | 0.0007534 | 0.04574  | 0.0008051 | .                                |
| rs12422982 | 12 | 114066003 | 0.0007535 | -0.04184 | 0.0007105 | .                                |
| rs140085   | 22 | 32129456  | 0.0007539 | 0.0771   | 0.0008302 | .                                |
| rs12663537 | 6  | 43210695  | 0.0007541 | 0.04329  | 0.0006789 | TTBK1(-0.526kb) PARC(+18.37kb) C |

|            |    |           |           |          |           |                                |
|------------|----|-----------|-----------|----------|-----------|--------------------------------|
| rs2101980  | 6  | 92562268  | 0.0007542 | -0.0516  | 0.0008597 | .                              |
| rs6703317  | 1  | 86378429  | 0.0007544 | 0.04529  | 0.0007311 | COL24A1(0)                     |
| rs677614   | 7  | 138640201 | 0.0007559 | 0.04467  | 0.0008145 | .                              |
| rs12960196 | 18 | 57208218  | 0.0007564 | 0.1815   | 0.000874  | CCBE1(0)                       |
| rs34581296 | 18 | 57207051  | 0.0007564 | 0.1815   | 0.000874  | CCBE1(0)                       |
| rs12493667 | 3  | 116444055 | 0.0007572 | -0.1013  | 0.0007007 | .                              |
| rs1432363  | 3  | 116444705 | 0.0007572 | -0.1013  | 0.0007007 | .                              |
| rs16842062 | 1  | 223908780 | 0.0007574 | 0.09952  | 0.0006559 | CAPN2(0)                       |
| rs35541945 | 4  | 81474644  | 0.0007578 | -0.07356 | 0.0009544 | C4orf22(0)                     |
| rs12606673 | 18 | 68433668  | 0.0007593 | 0.04579  | 0.0008327 | .                              |
| rs2567039  | 3  | 88097024  | 0.0007593 | 0.09817  | 0.0007504 | CGGBP1(-4.075kb)               |
| rs152585   | 5  | 106787266 | 0.0007595 | -0.04437 | 0.0008696 | EFNA5(0)                       |
| rs7691249  | 4  | 58379153  | 0.0007596 | -0.05206 | 0.0006998 | .                              |
| rs11580689 | 1  | 223906640 | 0.0007607 | 0.09926  | 0.0006741 | CAPN2(0)                       |
| rs11581716 | 1  | 223908067 | 0.0007607 | 0.09926  | 0.0006741 | CAPN2(0)                       |
| rs28370029 | 1  | 223907538 | 0.0007607 | 0.09926  | 0.0006741 | CAPN2(0)                       |
| rs5007371  | 1  | 102411122 | 0.0007609 | 0.0426   | 0.0007801 | OLFM3(0)                       |
| rs55765485 | 6  | 87448734  | 0.0007609 | 0.04156  | 0.0008062 | .                              |
| rs13277714 | 8  | 117791528 | 0.0007613 | 0.0671   | 0.0007276 | UTP23(+7.331kb)                |
| rs1325181  | 6  | 87439714  | 0.0007616 | 0.04168  | 0.0008144 | .                              |
| rs62154873 | 2  | 98726837  | 0.0007622 | 0.05008  | 0.0006835 | VWA3B(0)                       |
| rs12062831 | 1  | 224876439 | 0.000763  | -0.1478  | 0.0007313 | CNIH3(0)                       |
| rs12088524 | 1  | 224876060 | 0.000763  | -0.04767 | 0.0007313 | CNIH3(0)                       |
| rs12141649 | 1  | 223665301 | 0.000763  | -0.04767 | 0.0007278 | .                              |
| rs491811   | 9  | 138544365 | 0.000763  | 0.0528   | 0.0007992 | LCN9(-10.8kb) GLT6D1(+12.98kb) |
| rs6132239  | 20 | 19867042  | 0.000763  | 0.04153  | 0.0007602 | RIN2(-3.167kb)                 |
| rs6007210  | 22 | 45007266  | 0.0007631 | 0.1064   | 0.0007197 | .                              |
| rs7685529  | 4  | 139155804 | 0.0007632 | -0.04208 | 0.0009101 | SLC7A11(0)                     |
| rs1242923  | 14 | 23074509  | 0.0007636 | -0.04372 | 0.0007178 | DAD1(+16.37kb) ABHD4(0)        |
| rs299216   | 5  | 118396228 | 0.0007639 | -0.05627 | 0.0007398 | DMXL1(-10.86kb)                |
| rs2689787  | 7  | 79334324  | 0.0007642 | -0.04175 | 0.0008589 | .                              |
| rs12429115 | 13 | 38596233  | 0.0007643 | -0.05981 | 0.000871  | .                              |
| rs12853478 | 13 | 38597452  | 0.0007643 | -0.05981 | 0.000871  | .                              |
| rs12413383 | 10 | 27063560  | 0.0007649 | -0.05426 | 0.0008339 | ABI1(0)                        |
| rs13247370 | 7  | 12514632  | 0.0007653 | -0.06071 | 0.0007976 | .                              |
| rs61603030 | 1  | 224854415 | 0.0007655 | -0.04766 | 0.0007172 | CNIH3(0)                       |
| rs4771558  | 13 | 107869646 | 0.0007658 | 0.04137  | 0.0007399 | FAM155A(0)                     |
| rs55790218 | 2  | 217797568 | 0.0007659 | 0.1299   | 0.0008671 | .                              |
| rs105199   | 22 | 45929577  | 0.0007662 | 0.06342  | 0.000708  | FBLN1(0)                       |
| rs1403271  | 2  | 57540355  | 0.0007666 | -0.062   | 0.0006243 | .                              |
| rs760335   | 14 | 94814944  | 0.0007667 | -0.04111 | 0.000807  | .                              |
| rs6124159  | 20 | 38135694  | 0.0007672 | 0.04165  | 0.0007732 | .                              |
| rs11107495 | 12 | 94672306  | 0.0007673 | -0.1338  | 0.0007457 | PLXNC1(0)                      |
| rs152584   | 5  | 106790327 | 0.0007673 | -0.04444 | 0.0008766 | EFNA5(0)                       |
| rs737084   | 22 | 32268400  | 0.0007674 | 0.05526  | 0.0007154 | DEPDC5(0)                      |
| rs1577883  | 13 | 38592497  | 0.0007677 | -0.06023 | 0.0008783 | .                              |
| rs2967832  | 5  | 3793054   | 0.0007683 | 0.08431  | 0.0008006 | .                              |



|            |    |           |           |          |           |                                 |
|------------|----|-----------|-----------|----------|-----------|---------------------------------|
| rs10958003 | 8  | 51555678  | 0.0007684 | 0.0611   | 0.000781  | SNTG1(0)                        |
| rs11991963 | 8  | 51555943  | 0.0007684 | 0.0611   | 0.000781  | SNTG1(0)                        |
| rs10434310 | 4  | 188170299 | 0.0007692 | 0.04335  | 0.0008323 | .                               |
| rs1608514  | 7  | 79332947  | 0.0007695 | -0.04195 | 0.0008078 | .                               |
| rs2486163  | 1  | 47004680  | 0.0007697 | 0.05008  | 0.0008905 | MKNK1(-18.41kb) KNCN(-6.635kb)  |
| rs8043624  | 16 | 74967819  | 0.0007708 | -0.04664 | 0.0008983 | WDR59(0)                        |
| rs4665466  | 2  | 29759377  | 0.000771  | -0.06701 | 0.0007978 | ALK(0)                          |
| rs1781269  | 9  | 8234239   | 0.0007712 | 0.04215  | 0.0007804 | .                               |
| rs9287687  | 2  | 5395563   | 0.0007712 | 0.05787  | 0.0008256 | .                               |
| rs2119499  | 4  | 58387793  | 0.0007724 | -0.1202  | 0.0007064 | .                               |
| rs58578704 | 14 | 25697200  | 0.0007724 | -0.0518  | 0.0007288 | .                               |
| rs34797069 | 2  | 221207108 | 0.0007727 | -0.05335 | 0.0009128 | .                               |
| rs16956609 | 16 | 66549280  | 0.0007734 | 0.1172   | 0.0008167 | TK2(0)                          |
| rs12667972 | 7  | 25553702  | 0.0007735 | 0.05683  | 0.0006248 | .                               |
| rs2649105  | 8  | 118285854 | 0.0007742 | -0.04253 | 0.0009277 | .                               |
| rs10413286 | 19 | 5595354   | 0.0007745 | -0.04262 | 0.0006441 | SAFB2(0)                        |
| rs12699381 | 7  | 12527026  | 0.0007748 | -0.06102 | 0.0008052 | .                               |
| rs6999367  | 8  | 13171706  | 0.000775  | 0.09124  | 0.0007634 | DLC1(0)                         |
| rs62319742 | 4  | 124581262 | 0.0007755 | -0.1105  | 0.0007759 | .                               |
| rs6985638  | 8  | 13170244  | 0.0007761 | 0.09116  | 0.0007725 | DLC1(0)                         |
| rs1018651  | 13 | 70742241  | 0.0007763 | 0.1668   | 0.0008216 | .                               |
| rs12430969 | 13 | 70743395  | 0.0007763 | 0.1668   | 0.0008216 | .                               |
| rs2498507  | 13 | 70738363  | 0.0007763 | 0.1668   | 0.0008216 | .                               |
| rs2743607  | 6  | 19582396  | 0.0007768 | -0.1012  | 0.0007218 | .                               |
| rs518150   | 9  | 138544901 | 0.0007768 | -0.08074 | 0.000752  | LCN9(-10.27kb) GLT6D1(+13.52kb) |
| rs7637280  | 3  | 63072560  | 0.0007768 | 0.04219  | 0.000709  | .                               |
| rs28435921 | 8  | 77892834  | 0.000777  | 0.04303  | 0.0008129 | PXMP3(0)                        |
| rs10022231 | 4  | 94724040  | 0.0007774 | 0.05922  | 0.0007877 | .                               |
| rs10050093 | 4  | 94723779  | 0.0007774 | 0.04209  | 0.0007877 | .                               |
| rs11216426 | 11 | 98547169  | 0.0007774 | 0.04209  | 0.0006646 | .                               |
| rs243864   | 16 | 55512322  | 0.0007778 | 0.04916  | 0.0008799 | MMP2(-0.758kb)                  |
| rs2095672  | 13 | 38592843  | 0.000778  | -0.05979 | 0.0008842 | .                               |
| rs3746891  | 21 | 43161357  | 0.0007784 | 0.1412   | 0.0007861 | RIPK4(0)                        |
| rs3755847  | 4  | 5815929   | 0.0007786 | -0.05535 | 0.0007646 | EVC(0) CRMP1(-6.561kb)          |
| rs885913   | 6  | 30174428  | 0.0007796 | 0.06028  | 0.0008522 | TRIM26(0)                       |
| rs7925551  | 11 | 1729250   | 0.0007798 | 0.09211  | 0.0008043 | KRTAP5-6(+10.27kb) HCCA2(0)     |
| rs59092150 | 18 | 68394809  | 0.0007806 | 0.04585  | 0.0008994 | .                               |
| rs61319814 | 18 | 68394823  | 0.0007806 | 0.04585  | 0.0008994 | .                               |
| rs2736899  | 14 | 94823220  | 0.0007807 | 0.04108  | 0.0008133 | SERPINA1(-19.86kb)              |
| rs16956603 | 16 | 66546790  | 0.0007808 | 0.1171   | 0.0008227 | TK2(0)                          |
| rs1671403  | 8  | 13174730  | 0.000781  | 0.06549  | 0.0008418 | DLC1(0)                         |
| rs919586   | 8  | 13174671  | 0.000781  | 0.06549  | 0.0008418 | DLC1(0)                         |
| rs12151793 | 2  | 215272595 | 0.0007811 | 0.05852  | 0.0008374 | SPAG16(0) LOC402117(-3.865kb)   |
| rs13086798 | 3  | 41626139  | 0.0007828 | 0.05385  | 0.0008062 | ULK4(0)                         |
| rs7843746  | 8  | 775025    | 0.0007828 | 0.04725  | 0.0008311 | .                               |
| rs1529222  | 18 | 68389709  | 0.0007831 | 0.04591  | 0.0008918 | .                               |
| rs11732567 | 4  | 188175565 | 0.0007837 | 0.04266  | 0.0008527 | .                               |

|            |    |           |           |          |           |                            |
|------------|----|-----------|-----------|----------|-----------|----------------------------|
| rs10871676 | 18 | 68577811  | 0.0007841 | 0.04239  | 0.0009495 | .                          |
| rs12027686 | 1  | 103182910 | 0.0007842 | 0.08758  | 0.0006025 | .                          |
| rs12028639 | 1  | 103183729 | 0.0007842 | 0.08758  | 0.0006025 | .                          |
| rs12029870 | 1  | 103188552 | 0.0007842 | 0.08758  | 0.0006025 | .                          |
| rs59348970 | 1  | 103185122 | 0.0007842 | 0.08758  | 0.0006025 | .                          |
| rs1454564  | 2  | 221180941 | 0.0007844 | -0.05274 | 0.0009039 | .                          |
| rs3177567  | 17 | 9816631   | 0.000786  | 0.04306  | 0.0007673 | RCVRN(+7.947kb) GAS7(0)    |
| rs57650377 | 4  | 81409925  | 0.0007862 | -0.06213 | 0.0009488 | C4orf22(0)                 |
| rs6431872  | 2  | 5399337   | 0.0007867 | 0.04204  | 0.000829  | .                          |
| rs12422699 | 12 | 114066019 | 0.0007872 | -0.0417  | 0.0007549 | .                          |
| rs2074491  | 6  | 31239896  | 0.0007873 | -0.05885 | 0.000902  | HLA-C(+0.041kb)            |
| rs7319556  | 13 | 75061666  | 0.0007877 | 0.04121  | 0.0006878 | .                          |
| rs2743616  | 6  | 19597331  | 0.0007883 | 0.04435  | 0.0007279 | .                          |
| rs7701097  | 5  | 33224629  | 0.0007883 | -0.08067 | 0.0009254 | .                          |
| rs9465455  | 6  | 19593807  | 0.0007883 | -0.08067 | 0.0007279 | .                          |
| rs35876438 | 4  | 32800700  | 0.0007891 | 0.04827  | 0.0007911 | .                          |
| rs11737407 | 4  | 77359789  | 0.0007893 | 0.05345  | 0.0009114 | SHROOM3(0)                 |
| rs1409585  | 13 | 75060578  | 0.0007899 | 0.04119  | 0.0006917 | .                          |
| rs58643379 | 7  | 156558952 | 0.0007899 | 0.04119  | 0.0007049 | LMBR1(0)                   |
| rs7338054  | 13 | 75061012  | 0.0007899 | 0.05883  | 0.0006917 | .                          |
| rs1416943  | 9  | 120150050 | 0.00079   | -0.05103 | 0.0009392 | ASTN2(0)                   |
| rs36130652 | 13 | 38613535  | 0.0007906 | -0.06108 | 0.0009039 | .                          |
| rs6725737  | 2  | 41155423  | 0.000791  | 0.1367   | 0.0008686 | .                          |
| rs6510354  | 19 | 33614855  | 0.0007911 | -0.07011 | 0.0008641 | WDR88(-8.142kb) GPATCH1(0) |
| rs10216485 | 8  | 51550004  | 0.0007913 | 0.06098  | 0.0008049 | SNTG1(0)                   |
| rs10216995 | 8  | 51549845  | 0.0007913 | 0.06098  | 0.0008049 | SNTG1(0)                   |
| rs11997602 | 8  | 51549559  | 0.0007913 | 0.06098  | 0.0008049 | SNTG1(0)                   |
| rs1383799  | 8  | 95300063  | 0.0007924 | -0.04252 | 0.0008131 | .                          |
| rs1695725  | 8  | 118289276 | 0.0007924 | 0.1456   | 0.0008218 | .                          |
| rs4576176  | 5  | 118453771 | 0.0007927 | -0.0572  | 0.0007909 | DMXL1(0)                   |
| rs4799729  | 18 | 31393521  | 0.0007931 | -0.04058 | 0.0007072 | .                          |
| rs7238717  | 18 | 31395186  | 0.0007931 | -0.04058 | 0.0007072 | .                          |
| rs990882   | 18 | 31398180  | 0.0007931 | -0.04058 | 0.0007072 | .                          |
| rs35971329 | 13 | 38585193  | 0.0007933 | -0.05969 | 0.0009031 | .                          |
| rs2824791  | 21 | 19757680  | 0.0007937 | 0.06991  | 0.0007654 | PRSS7(0)                   |
| rs7007250  | 8  | 117801441 | 0.0007939 | -0.05103 | 0.0007678 | UTP23(+17.24kb)            |
| rs7915008  | 10 | 123025225 | 0.0007939 | 0.06331  | 0.0007626 | .                          |
| rs1018882  | 17 | 67884624  | 0.0007949 | -0.05516 | 0.0008638 | .                          |
| rs1018883  | 17 | 67884617  | 0.0007949 | -0.05516 | 0.0008638 | .                          |
| rs354349   | 6  | 66287365  | 0.0007956 | 0.0498   | 0.000776  | EGFL11(0)                  |
| rs4885197  | 13 | 75053287  | 0.0007957 | 0.04204  | 0.0006689 | .                          |
| rs4932593  | 15 | 92519398  | 0.000796  | 0.04219  | 0.0007743 | SLCO3A1(0)                 |
| rs6426713  | 1  | 21803177  | 0.0007961 | -0.04119 | 0.0007762 | NBPF3(0)                   |
| rs35711819 | 3  | 104844157 | 0.0007964 | -0.05098 | 0.0007697 | .                          |
| rs7942500  | 11 | 36734609  | 0.0007981 | 0.04489  | 0.0006828 | .                          |
| rs17755083 | 9  | 26685935  | 0.0007982 | -0.05632 | 0.0009364 | .                          |
| rs1047342  | 17 | 9815580   | 0.0007987 | 0.04374  | 0.0007489 | RCVRN(+6.896kb) GAS7(0)    |

|            |    |           |           |          |           |                                  |
|------------|----|-----------|-----------|----------|-----------|----------------------------------|
| rs62113465 | 2  | 5349521   | 0.0007988 | 0.04559  | 0.0008688 | .                                |
| rs12029492 | 1  | 4833747   | 0.0007993 | -0.06577 | 0.0009926 | AJAP1(0)                         |
| rs7425501  | 2  | 5349911   | 0.0007994 | 0.04545  | 0.0008803 | .                                |
| rs35363750 | 18 | 64042043  | 0.0008007 | -0.05318 | 0.0009976 | .                                |
| rs4600560  | 18 | 64042795  | 0.0008007 | -0.05318 | 0.0009976 | .                                |
| rs34846424 | 4  | 188166018 | 0.0008011 | 0.04269  | 0.000902  | .                                |
| rs993467   | 2  | 66095496  | 0.0008012 | 0.05458  | 0.0009299 | .                                |
| rs3843985  | 3  | 104859722 | 0.0008016 | -0.05145 | 0.0007572 | .                                |
| rs34085940 | 5  | 67038595  | 0.0008019 | -0.04053 | 0.0008675 | .                                |
| rs9964702  | 18 | 31390427  | 0.0008019 | 0.04352  | 0.0007183 | .                                |
| rs2103503  | 8  | 11652657  | 0.000802  | -0.05379 | 0.0008576 | NEIL2(+7.803kb) FDFT1(-7.532kb)  |
| rs11927968 | 3  | 57125727  | 0.0008023 | -0.05405 | 0.0008506 | SPATA12(+16.27kb) IL17RD(0) ARHG |
| rs10057228 | 5  | 133129120 | 0.0008035 | 0.08173  | 0.0007599 | .                                |
| rs62336486 | 4  | 186863550 | 0.0008035 | -0.07699 | 0.0009384 | SORBS2(0)                        |
| rs334013   | 2  | 179121889 | 0.0008042 | 0.04135  | 0.0008513 | OSBPL6(0)                        |
| rs1879168  | 3  | 148938380 | 0.0008044 | -0.07587 | 0.000927  | CP(0)                            |
| rs1879169  | 3  | 148938346 | 0.0008044 | -0.07587 | 0.000927  | CP(0)                            |
| rs747692   | 6  | 33737436  | 0.0008047 | -0.05015 | 0.0008354 | LEMD2(-1.553kb)                  |
| rs11819704 | 10 | 87234574  | 0.0008051 | -0.04597 | 0.0008792 | .                                |
| rs34153972 | 10 | 87235262  | 0.0008051 | -0.04597 | 0.0008792 | .                                |
| rs11773913 | 8  | 10470915  | 0.0008054 | 0.05115  | 0.0007767 | RP1L1(0)                         |
| rs17151770 | 7  | 25544769  | 0.0008058 | 0.0565   | 0.0006618 | .                                |
| rs59698680 | 4  | 170915908 | 0.0008065 | -0.07632 | 0.0009808 | MFAP3L(0)                        |
| rs10432402 | 2  | 5467135   | 0.000807  | -0.04217 | 0.0008926 | .                                |
| rs11066655 | 12 | 114073905 | 0.000807  | 0.05153  | 0.0007212 | .                                |
| rs2445972  | 6  | 70471347  | 0.0008074 | 0.05352  | 0.0009226 | LMBRD1(0)                        |
| rs1474341  | 7  | 79327631  | 0.0008077 | -0.04953 | 0.0008492 | .                                |
| rs1523846  | 7  | 79328033  | 0.0008077 | -0.04178 | 0.0008492 | .                                |
| rs2714651  | 7  | 79327530  | 0.0008077 | -0.04178 | 0.0008492 | .                                |
| rs4467312  | 2  | 50826484  | 0.0008077 | -0.04178 | 0.0007738 | NRXN1(0)                         |
| rs606678   | 1  | 86432168  | 0.0008078 | 0.04522  | 0.0007898 | COL24A1(0)                       |
| rs7563874  | 2  | 215325694 | 0.0008079 | 0.06001  | 0.0008686 | LOC402117(0)                     |
| rs12361923 | 11 | 98524203  | 0.0008082 | 0.05387  | 0.000726  | .                                |
| rs1379661  | 21 | 28929958  | 0.0008084 | -0.07247 | 0.0009808 | .                                |
| rs993873   | 7  | 48993663  | 0.0008093 | 0.04133  | 0.0007488 | .                                |
| rs7827306  | 8  | 52233276  | 0.0008098 | 0.04685  | 0.0009924 | PXDNL(0)                         |
| rs17192454 | 8  | 13169396  | 0.0008104 | 0.09086  | 0.0008051 | DLC1(0)                          |
| rs6081790  | 20 | 19862917  | 0.0008108 | -0.05404 | 0.0008676 | RIN2(-7.292kb)                   |
| rs7008008  | 8  | 776864    | 0.0008117 | 0.04707  | 0.0008726 | .                                |
| rs1499438  | 8  | 118284996 | 0.0008118 | -0.04209 | 0.0008925 | .                                |
| rs12542148 | 8  | 27111265  | 0.0008119 | -0.06464 | 0.0008665 | STMN4(0)                         |
| rs11216319 | 11 | 98519686  | 0.000812  | 0.05291  | 0.0007234 | .                                |
| rs256810   | 5  | 82260434  | 0.0008122 | 0.05244  | 0.0007866 | .                                |
| rs12967222 | 18 | 68435693  | 0.0008123 | 0.04529  | 0.0009213 | .                                |
| rs12967132 | 18 | 31720928  | 0.0008127 | 0.04095  | 0.0007905 | NOL4(0)                          |
| rs2256001  | 21 | 37341449  | 0.0008128 | 0.04162  | 0.0006617 | .                                |
| rs3826160  | 16 | 66555745  | 0.0008133 | 0.115    | 0.0008601 | TK2(0)                           |

|            |    |           |           |          |           |                               |
|------------|----|-----------|-----------|----------|-----------|-------------------------------|
| rs56886347 | 16 | 66556265  | 0.0008133 | 0.115    | 0.0008601 | TK2(0)                        |
| rs11957144 | 5  | 33351008  | 0.0008139 | 0.0474   | 0.0006738 | .                             |
| rs12697287 | 5  | 33356108  | 0.0008139 | 0.0474   | 0.0006738 | .                             |
| rs1834884  | 5  | 33353614  | 0.0008139 | 0.0474   | 0.0006738 | .                             |
| rs324423   | 1  | 46885104  | 0.0008143 | -0.08725 | 0.0008088 | FAAH(+5.584kb)                |
| rs4742477  | 9  | 8234638   | 0.0008143 | 0.05664  | 0.0008275 | .                             |
| rs1780324  | 1  | 21821757  | 0.0008144 | -0.03972 | 0.0008867 | NBPF3(+10.36kb) ALPL(-14.1kb) |
| rs61783463 | 1  | 9335124   | 0.0008144 | 0.04443  | 0.0007956 | SPSB1(-17.86kb) H6PD(+3.73kb) |
| rs36159502 | 1  | 119247746 | 0.0008147 | 0.09986  | 0.0006797 | .                             |
| rs9634562  | 13 | 107869666 | 0.0008155 | 0.04116  | 0.0007904 | FAM155A(0)                    |
| rs36173628 | 4  | 30876173  | 0.0008156 | -0.04799 | 0.0008397 | PCDH7(0)                      |
| rs28397310 | 6  | 31234501  | 0.0008157 | -0.06158 | 0.0009822 | HLA-C(-2.027kb)               |
| rs675396   | 7  | 138646317 | 0.0008161 | 0.04869  | 0.0009678 | .                             |
| rs3822753  | 5  | 95124328  | 0.0008167 | -0.04165 | 0.0008089 | RHOBTB3(0)                    |
| rs1393548  | 5  | 3795195   | 0.0008168 | 0.08304  | 0.0008787 | .                             |
| rs12073052 | 1  | 224846750 | 0.0008178 | -0.04741 | 0.0007646 | CNIH3(0)                      |
| rs12567125 | 1  | 224848066 | 0.0008178 | -0.04741 | 0.0007646 | CNIH3(0)                      |
| rs28991270 | 2  | 1497342   | 0.0008181 | -0.1009  | 0.0007896 | TPO(0)                        |
| rs35176178 | 9  | 26702745  | 0.0008182 | -0.05476 | 0.0009733 | .                             |
| rs532557   | 7  | 138645544 | 0.0008184 | 0.04865  | 0.0009738 | .                             |
| rs10878574 | 12 | 40828264  | 0.0008197 | -0.06103 | 0.000775  | .                             |
| rs10411921 | 19 | 33608500  | 0.00082   | -0.06858 | 0.000947  | WDR88(-14.5kb) GPATCH1(0)     |
| rs9874051  | 3  | 189943401 | 0.0008202 | 0.06264  | 0.0007976 | .                             |
| rs11827969 | 11 | 129797921 | 0.0008203 | 0.1093   | 0.0008746 | PRDM10(0)                     |
| rs17333600 | 2  | 5377640   | 0.0008203 | 0.04278  | 0.0008853 | .                             |
| rs9349159  | 6  | 40595883  | 0.0008204 | -0.05284 | 0.0009125 | .                             |
| rs11107524 | 12 | 94784130  | 0.0008206 | -0.1686  | 0.0007607 | CCDC41(0)                     |
| rs11745241 | 5  | 150293872 | 0.0008212 | 0.08191  | 0.000955  | ZNF300(+9.481kb)              |
| rs6739798  | 2  | 181465853 | 0.0008213 | 0.05307  | 0.0009306 | .                             |
| rs1047339  | 17 | 9815411   | 0.0008225 | 0.04358  | 0.0007857 | RCVRN(+6.727kb) GAS7(0)       |
| rs9903165  | 17 | 68724984  | 0.0008226 | 0.1591   | 0.0009351 | .                             |
| rs9836739  | 3  | 170520811 | 0.0008231 | 0.05245  | 0.0007325 | .                             |
| rs3823613  | 7  | 156555594 | 0.0008234 | 0.05858  | 0.0007268 | LMBR1(0)                      |
| rs12432328 | 14 | 27304039  | 0.0008245 | 0.04809  | 0.0007508 | .                             |
| rs9947894  | 18 | 31328720  | 0.0008251 | -0.04104 | 0.0007336 | ASXL3(+1.321kb)               |
| rs12287855 | 11 | 36728338  | 0.0008253 | 0.05401  | 0.000787  | .                             |
| rs11761930 | 7  | 17623697  | 0.0008259 | 0.04759  | 0.0008617 | .                             |
| rs8078361  | 17 | 26230480  | 0.0008259 | 0.04489  | 0.0007729 | LOC201229(+10.07kb)           |
| rs9591115  | 13 | 48430407  | 0.0008264 | 0.08076  | 0.0007845 | .                             |
| rs28397268 | 6  | 31164590  | 0.000827  | -0.05077 | 0.0009665 | HCG27(-1.008kb)               |
| rs2445640  | 1  | 26788319  | 0.0008271 | 0.05713  | 0.0009314 | HMG2(-10.58kb) DHDDS(0)       |
| rs34188827 | 3  | 121721523 | 0.0008281 | 0.07465  | 0.0009621 | ILDR1(0)                      |
| rs2457343  | 6  | 20093664  | 0.0008283 | 0.08859  | 0.0008652 | MBOAT1(-7.27kb)               |
| rs4635486  | 2  | 29746088  | 0.0008288 | -0.06557 | 0.0008556 | ALK(0)                        |
| rs4771559  | 13 | 107873033 | 0.0008292 | 0.04109  | 0.0007964 | FAM155A(0)                    |
| rs2380593  | 2  | 14497492  | 0.0008293 | -0.04202 | 0.0009044 | .                             |
| rs6759693  | 2  | 5399202   | 0.0008296 | 0.04172  | 0.0008767 | .                             |

|            |    |           |           |          |           |                  |
|------------|----|-----------|-----------|----------|-----------|------------------|
| rs9904889  | 17 | 67861595  | 0.0008299 | -0.05425 | 0.0009303 | .                |
| rs6983957  | 8  | 15242827  | 0.00083   | 0.04815  | 0.0007963 | .                |
| rs11184906 | 1  | 106990652 | 0.0008301 | -0.05858 | 0.0008873 | .                |
| rs1482225  | 11 | 98357386  | 0.0008327 | 0.04099  | 0.0007359 | .                |
| rs1768574  | 9  | 8234235   | 0.0008328 | 0.05749  | 0.0008462 | .                |
| rs12088838 | 1  | 86364433  | 0.0008332 | 0.04449  | 0.0008045 | COL24A1(0)       |
| rs7257817  | 19 | 28462580  | 0.0008333 | -0.06602 | 0.0009872 | .                |
| rs2824784  | 21 | 19750078  | 0.0008351 | 0.06944  | 0.0008375 | PRSS7(0)         |
| rs4951473  | 1  | 213082267 | 0.0008353 | -0.05025 | 0.0008359 | FLVCR1(+13.51kb) |
| rs10866286 | 4  | 186866070 | 0.0008354 | 0.07936  | 0.0009592 | SORBS2(0)        |
| rs2054050  | 2  | 221210316 | 0.0008361 | -0.05301 | 0.0009607 | .                |
| rs10089435 | 8  | 91571436  | 0.0008362 | 0.1316   | 0.0008678 | .                |
| rs28635136 | 8  | 91561899  | 0.0008362 | 0.1316   | 0.0008678 | .                |
| rs59462227 | 8  | 91563869  | 0.0008362 | 0.1316   | 0.0008678 | .                |
| rs976393   | 2  | 66094656  | 0.0008363 | 0.05331  | 0.0009719 | .                |
| rs58148005 | 2  | 57477320  | 0.0008371 | -0.06132 | 0.0006931 | .                |
| rs10892084 | 11 | 98515385  | 0.0008379 | 0.05243  | 0.000733  | .                |
| rs34835532 | 16 | 77983594  | 0.0008379 | -0.05874 | 0.0009861 | KIAA1576(0)      |
| rs7734122  | 5  | 169933879 | 0.000838  | 0.04134  | 0.0007572 | KCNIP1(0)        |
| rs9982765  | 21 | 33576627  | 0.000838  | -0.04255 | 0.0008884 | .                |
| rs1030355  | 4  | 124563874 | 0.0008395 | -0.07764 | 0.0007994 | .                |
| rs11791306 | 9  | 89966967  | 0.00084   | -0.06579 | 0.0008725 | .                |
| rs10430461 | 10 | 65619384  | 0.0008401 | -0.04337 | 0.0008154 | .                |
| rs13236753 | 7  | 95422575  | 0.0008405 | 0.05084  | 0.0008329 | DYNC111(0)       |
| rs11897844 | 2  | 215334760 | 0.0008407 | 0.05892  | 0.0009032 | LOC402117(0)     |
| rs11958491 | 5  | 145715790 | 0.000841  | -0.09162 | 0.0007891 | POU4F3(-2.885kb) |
| rs12676431 | 8  | 77987068  | 0.0008411 | 0.04248  | 0.0008328 | .                |
| rs61976832 | 14 | 25318084  | 0.0008412 | 0.04782  | 0.0008189 | STXBP6(0)        |
| rs1806655  | 3  | 121716240 | 0.0008417 | 0.07526  | 0.0009909 | ILDR1(0)         |
| rs2174051  | 1  | 86389679  | 0.0008418 | 0.04458  | 0.0008125 | COL24A1(0)       |
| rs4377433  | 22 | 50568521  | 0.0008418 | 0.06125  | 0.0008493 | MOV10L1(0)       |
| rs3736282  | 3  | 148939393 | 0.000842  | -0.07482 | 0.0009508 | CP(0)            |
| rs62102311 | 18 | 68375242  | 0.0008428 | 0.04561  | 0.0009534 | .                |
| rs10273045 | 7  | 12519371  | 0.0008431 | -0.04572 | 0.00088   | .                |
| rs13221702 | 7  | 12519076  | 0.0008431 | -0.06047 | 0.00088   | .                |
| rs13227809 | 7  | 12525557  | 0.0008431 | -0.06047 | 0.00088   | .                |
| rs17448193 | 7  | 12525641  | 0.0008431 | -0.06047 | 0.00088   | .                |
| rs35292807 | 4  | 138277283 | 0.0008431 | -0.06047 | 0.0008446 | .                |
| rs35317839 | 7  | 12524397  | 0.0008431 | -0.06047 | 0.00088   | .                |
| rs4719315  | 7  | 12528634  | 0.0008431 | -0.06047 | 0.00088   | .                |
| rs7808537  | 7  | 12520913  | 0.0008431 | -0.06047 | 0.00088   | .                |
| rs17151750 | 7  | 25536879  | 0.0008436 | 0.05675  | 0.0006805 | .                |
| rs17151753 | 7  | 25537297  | 0.0008436 | 0.05675  | 0.0006805 | .                |
| rs1598054  | 4  | 59399590  | 0.0008438 | 0.04157  | 0.0007186 | .                |
| rs11221992 | 11 | 130046909 | 0.0008439 | -0.1109  | 0.0008965 | ST14(0)          |
| rs854396   | 14 | 25301361  | 0.0008439 | 0.04398  | 0.0008522 | STXBP6(0)        |
| rs2040106  | 21 | 33614709  | 0.000844  | 0.04137  | 0.000883  | .                |

|            |    |           |           |          |           |                                  |
|------------|----|-----------|-----------|----------|-----------|----------------------------------|
| rs60511391 | 2  | 57476989  | 0.000845  | 0.04886  | 0.0006972 | .                                |
| rs996928   | 18 | 5144551   | 0.000845  | -0.0613  | 0.0009227 | .                                |
| rs9576427  | 13 | 38624871  | 0.0008451 | -0.06032 | 0.0009592 | .                                |
| rs11088213 | 21 | 33613710  | 0.0008453 | 0.04148  | 0.0008715 | .                                |
| rs6771678  | 3  | 68283196  | 0.0008457 | 0.04446  | 0.0007649 | FAM19A1(0)                       |
| rs3743711  | 16 | 66542957  | 0.0008458 | 0.1131   | 0.0009001 | TK2(-0.387kb)                    |
| rs56275774 | 2  | 5350645   | 0.0008462 | 0.04564  | 0.0009145 | .                                |
| rs9519403  | 13 | 105249030 | 0.0008462 | 0.04615  | 0.0008263 | .                                |
| rs12472335 | 2  | 5374488   | 0.0008464 | 0.0428   | 0.0009205 | .                                |
| rs7704598  | 5  | 167735407 | 0.0008474 | 0.04331  | 0.0009085 | WWC1(0)                          |
| rs61331967 | 16 | 77988676  | 0.0008499 | -0.06738 | 0.0008296 | KIAA1576(0)                      |
| rs6793537  | 3  | 63023857  | 0.0008506 | -0.1048  | 0.0007715 | .                                |
| rs7923406  | 10 | 87238073  | 0.0008509 | -0.04758 | 0.0008694 | .                                |
| rs2211675  | 21 | 33553105  | 0.0008511 | -0.0554  | 0.0008783 | .                                |
| rs57604597 | 13 | 69056059  | 0.0008511 | -0.0554  | 0.0008796 | .                                |
| rs59111232 | 8  | 95413497  | 0.0008511 | 0.04101  | 0.0007415 | RAD54B(0)                        |
| rs60896272 | 13 | 69056055  | 0.0008511 | 0.1484   | 0.0008796 | .                                |
| rs28687900 | 8  | 118464119 | 0.0008512 | 0.04386  | 0.0008861 | .                                |
| rs35071721 | 15 | 63290705  | 0.0008524 | -0.08958 | 0.0009015 | .                                |
| rs9519402  | 13 | 105248757 | 0.0008525 | 0.0456   | 0.0008278 | .                                |
| rs1730538  | 18 | 68375442  | 0.0008527 | 0.04532  | 0.0009641 | .                                |
| rs6986783  | 8  | 91620564  | 0.000853  | 0.1299   | 0.0008733 | TMEM64(-15.04kb)                 |
| rs7778562  | 7  | 156562222 | 0.0008533 | 0.05927  | 0.0007562 | LMBR1(0)                         |
| rs12677622 | 8  | 77981645  | 0.0008537 | 0.04227  | 0.0008584 | .                                |
| rs11993257 | 8  | 91583943  | 0.0008541 | 0.1305   | 0.0008904 | .                                |
| rs7683623  | 4  | 81443844  | 0.0008546 | -0.0612  | 0.0009931 | C4orf22(0)                       |
| rs8066555  | 17 | 72222024  | 0.0008549 | -0.1499  | 0.000888  | TTYH2(0) RPL38(+16kb)            |
| rs434182   | 18 | 20282856  | 0.000855  | 0.04502  | 0.0008263 | .                                |
| rs17471624 | 16 | 89631665  | 0.0008559 | -0.05793 | 0.0008077 | SPG7(+7.491kb) RPL13(+1.817kb) C |
| rs13093136 | 3  | 97637310  | 0.0008562 | -0.04293 | 0.0008702 | DKFZp667G2110(0)                 |
| rs1032791  | 6  | 66166420  | 0.0008564 | 0.0477   | 0.0008436 | EGFL11(0)                        |
| rs2255287  | 6  | 92559843  | 0.000857  | -0.05477 | 0.0008524 | .                                |
| rs11986619 | 8  | 13146491  | 0.0008573 | -0.1005  | 0.0008861 | DLC1(0)                          |
| rs28991272 | 2  | 1498207   | 0.0008573 | -0.1005  | 0.0008272 | TPO(0)                           |
| rs28991275 | 2  | 1498252   | 0.0008573 | 0.08569  | 0.0008272 | TPO(0)                           |
| rs1567596  | 4  | 184301110 | 0.0008576 | -0.04987 | 0.0009179 | .                                |
| rs6595175  | 5  | 118444434 | 0.0008579 | -0.05661 | 0.0008648 | DMXL1(0)                         |
| rs7648286  | 3  | 143888701 | 0.000858  | 0.0825   | 0.0008902 | .                                |
| rs11761987 | 7  | 17623897  | 0.0008583 | 0.04463  | 0.0008838 | .                                |
| rs11690930 | 2  | 193053136 | 0.0008587 | -0.06741 | 0.0008338 | TMEFF2(0)                        |
| rs16834274 | 2  | 193052661 | 0.0008587 | -0.06741 | 0.0008338 | TMEFF2(0)                        |
| rs2725277  | 8  | 48672124  | 0.0008587 | -0.09102 | 0.0008964 | PRKDC(-13.54kb)                  |
| rs9404983  | 6  | 31166828  | 0.000859  | -0.0504  | 0.0009881 | HCG27(0)                         |
| rs6886489  | 5  | 33234581  | 0.0008591 | 0.04688  | 0.0009182 | .                                |
| rs9926780  | 16 | 83394702  | 0.0008597 | -0.1188  | 0.0008678 | CDH13(0)                         |
| rs61883261 | 11 | 20984205  | 0.0008598 | 0.09609  | 0.0009759 | NELL1(0)                         |
| rs4839066  | 1  | 116812376 | 0.0008609 | 0.04498  | 0.0009586 | .                                |

|            |    |           |           |          |           |                                  |
|------------|----|-----------|-----------|----------|-----------|----------------------------------|
| rs11081827 | 18 | 31390228  | 0.0008619 | -0.04032 | 0.0007699 | .                                |
| rs11753083 | 6  | 33761111  | 0.0008621 | -0.05004 | 0.0008778 | MLN(-1.337kb) LEMD2(+4.215kb)    |
| rs7542296  | 1  | 46998009  | 0.0008627 | 0.04927  | 0.0009769 | KNCN(-13.31kb) DMBX1(+18.12kb)   |
| rs7964025  | 12 | 115852309 | 0.0008631 | -0.0477  | 0.0007593 | .                                |
| rs9354248  | 6  | 66166838  | 0.0008637 | 0.04972  | 0.0008507 | EGFL11(0)                        |
| rs931654   | 6  | 92561978  | 0.0008649 | -0.0509  | 0.0009729 | .                                |
| rs62415363 | 6  | 43212262  | 0.0008651 | 0.04996  | 0.0007608 | TTBK1(0) PARC(+19.94kb) C6orf108 |
| rs13009801 | 2  | 29764355  | 0.0008652 | 0.04523  | 0.0008902 | ALK(0)                           |
| rs4566276  | 18 | 68383835  | 0.0008652 | -0.0663  | 0.0009855 | .                                |
| rs6013148  | 20 | 49955158  | 0.0008653 | 0.1764   | 0.0008413 | .                                |
| rs9345642  | 6  | 66208634  | 0.0008654 | 0.0503   | 0.0008026 | EGFL11(0)                        |
| rs816189   | 12 | 117991734 | 0.0008656 | 0.04183  | 0.0009046 | KSR2(0)                          |
| rs11033750 | 11 | 36728603  | 0.000866  | 0.05385  | 0.0008199 | .                                |
| rs4917192  | 7  | 49000747  | 0.0008661 | 0.04118  | 0.000801  | .                                |
| rs2574943  | 10 | 52025167  | 0.0008667 | 0.05924  | 0.000914  | ASAH2(+16.85kb)                  |
| rs7819283  | 8  | 142598202 | 0.0008675 | 0.04975  | 0.0008496 | .                                |
| rs131254   | 22 | 32131022  | 0.0008677 | 0.07616  | 0.0009626 | DEPDC5(-19.05kb)                 |
| rs9357113  | 6  | 31149091  | 0.0008682 | -0.05285 | 0.0009501 | TCF19(+17.1kb) POU5F1(+10.64kb)  |
| rs7583697  | 2  | 215273421 | 0.0008685 | 0.05805  | 0.0009283 | SPAG16(0) LOC402117(-3.039kb)    |
| rs12156134 | 8  | 11675598  | 0.0008686 | -0.05106 | 0.0008962 | FDFT1(0)                         |
| rs9494145  | 6  | 135432552 | 0.0008686 | -0.05649 | 0.0008459 | .                                |
| rs12028223 | 1  | 107025500 | 0.0008687 | -0.05864 | 0.0009965 | .                                |
| rs12326847 | 18 | 3403308   | 0.0008694 | -0.05226 | 0.0007622 | TGIF1(-8.763kb)                  |
| rs6831022  | 4  | 58394009  | 0.0008707 | -0.05189 | 0.00086   | .                                |
| rs10944816 | 6  | 66286923  | 0.0008708 | 0.04923  | 0.0008247 | EGFL11(0)                        |
| rs2743604  | 6  | 19569095  | 0.0008711 | -0.08183 | 0.0007919 | .                                |
| rs28678238 | 8  | 54575605  | 0.0008724 | -0.09427 | 0.0007396 | .                                |
| rs28701586 | 8  | 54575481  | 0.0008724 | -0.09427 | 0.0007396 | .                                |
| rs28400375 | 8  | 91598346  | 0.0008725 | 0.1287   | 0.0009081 | .                                |
| rs11215594 | 11 | 98352409  | 0.0008735 | 0.04086  | 0.0008166 | .                                |
| rs2106693  | 15 | 91821018  | 0.0008737 | -0.06441 | 0.0009439 | SV2B(0)                          |
| rs854394   | 14 | 25305577  | 0.0008738 | 0.04398  | 0.0008974 | STXBP6(0)                        |
| rs58705088 | 5  | 58219551  | 0.0008745 | -0.08566 | 0.0009065 | .                                |
| rs12509813 | 4  | 76187243  | 0.0008752 | 0.04995  | 0.0009517 | .                                |
| rs12510708 | 4  | 76187186  | 0.0008752 | 0.04995  | 0.0009517 | .                                |
| rs1221977  | 18 | 49995119  | 0.0008759 | -0.04428 | 0.0009325 | DCC(0)                           |
| rs28397297 | 6  | 31206948  | 0.0008764 | -0.05527 | 0.0009016 | .                                |
| rs61880767 | 11 | 21008824  | 0.0008765 | 0.08611  | 0.0009181 | NELL1(0)                         |
| rs9856741  | 3  | 189945500 | 0.0008766 | 0.06168  | 0.0008624 | .                                |
| rs4669212  | 2  | 5447653   | 0.0008767 | -0.0426  | 0.0009969 | .                                |
| rs152602   | 5  | 106776118 | 0.0008771 | -0.04504 | 0.0009479 | EFNA5(0)                         |
| rs2845732  | 21 | 37339201  | 0.0008773 | 0.04142  | 0.0007329 | .                                |
| rs2032189  | 18 | 31332200  | 0.0008777 | -0.04107 | 0.0007778 | ASXL3(+4.801kb)                  |
| rs17058392 | 3  | 41562757  | 0.0008782 | 0.0784   | 0.0008673 | ULK4(0)                          |
| rs4951309  | 1  | 204112406 | 0.0008784 | 0.04043  | 0.0008172 | SOX13(+15.54kb) REN(-11.54kb) ET |
| rs2198453  | 15 | 24996502  | 0.0008795 | -0.04177 | 0.0008768 | .                                |
| rs34191477 | 9  | 88141598  | 0.0008805 | 0.1162   | 0.0008262 | AGTPBP1(-19.86kb)                |

|            |    |           |           |          |           |                                   |
|------------|----|-----------|-----------|----------|-----------|-----------------------------------|
| rs1129463  | 17 | 9816226   | 0.0008806 | 0.04268  | 0.0008511 | RCVRN(+7.542kb) GAS7(0)           |
| rs7122049  | 11 | 36731533  | 0.0008808 | 0.04495  | 0.0007425 | .                                 |
| rs4883972  | 13 | 75058481  | 0.0008813 | 0.04075  | 0.0007728 | .                                 |
| rs6554540  | 4  | 59396216  | 0.0008814 | 0.04123  | 0.0007644 | .                                 |
| rs6969309  | 7  | 12515847  | 0.0008815 | -0.06031 | 0.0009165 | .                                 |
| rs2833744  | 21 | 33622504  | 0.000882  | 0.04851  | 0.0009204 | C21orf45(-18.02kb)                |
| rs2451174  | 8  | 119241587 | 0.0008822 | 0.08791  | 0.0007805 | SAMD12(0)                         |
| rs506588   | 9  | 138544316 | 0.0008826 | 0.04105  | 0.000893  | LCN9(-10.85kb) GLT6D1(+12.93kb)   |
| rs10057869 | 5  | 58200229  | 0.0008829 | -0.08126 | 0.0008957 | .                                 |
| rs13328128 | 5  | 58200984  | 0.0008829 | -0.08126 | 0.0008957 | .                                 |
| rs6827217  | 4  | 6035453   | 0.0008832 | -0.07795 | 0.0009138 | JAKMIP1(0)                        |
| rs304225   | 3  | 62796691  | 0.0008833 | -0.07228 | 0.0009286 | CADPS(0)                          |
| rs60122876 | 21 | 40418098  | 0.0008837 | 0.1027   | 0.0009001 | .                                 |
| rs6996142  | 8  | 29920027  | 0.0008841 | -0.06376 | 0.0009354 | TMEM66(-0.603kb)                  |
| rs1567597  | 4  | 184301020 | 0.0008845 | -0.04924 | 0.0009586 | .                                 |
| rs11216114 | 11 | 98469842  | 0.0008861 | -0.05438 | 0.0008224 | .                                 |
| rs13298927 | 9  | 108857090 | 0.0008861 | 0.04754  | 0.0008366 | .                                 |
| rs56184507 | 11 | 62194796  | 0.0008861 | 0.064    | 0.0008738 | SCGB1A1(+4.129kb) AHNAK(-6.219kb) |
| rs1241625  | 14 | 25359649  | 0.0008866 | 0.04194  | 0.0009115 | STXBP6(0)                         |
| rs10203420 | 2  | 179153283 | 0.0008868 | 0.05932  | 0.000931  | OSBPL6(0)                         |
| rs583749   | 7  | 138641054 | 0.0008868 | 0.04133  | 0.0009463 | .                                 |
| rs7548260  | 1  | 241373109 | 0.0008868 | 0.0441   | 0.0008822 | RGS7(0)                           |
| rs58796606 | 2  | 57477069  | 0.0008871 | -0.06117 | 0.0007275 | .                                 |
| rs57819090 | 8  | 10469340  | 0.0008872 | 0.06299  | 0.0007392 | RP1L1(0)                          |
| rs9297580  | 8  | 119215564 | 0.0008873 | 0.08729  | 0.0007628 | SAMD12(0)                         |
| rs12203425 | 6  | 66127163  | 0.0008876 | 0.1541   | 0.0008506 | EGFL11(0)                         |
| rs12801174 | 11 | 129801374 | 0.0008876 | -0.09341 | 0.0009022 | PRDM10(0)                         |
| rs2059494  | 4  | 124550182 | 0.0008876 | 0.04634  | 0.0007662 | .                                 |
| rs9345624  | 6  | 66134810  | 0.0008876 | 0.04634  | 0.0008506 | EGFL11(0)                         |
| rs4600964  | 4  | 158438385 | 0.0008885 | 0.07067  | 0.0009168 | .                                 |
| rs6994559  | 8  | 77908143  | 0.0008885 | 0.04271  | 0.0008958 | PXMP3(0)                          |
| rs3783207  | 13 | 46752704  | 0.000889  | -0.04131 | 0.0008904 | LCP1(0)                           |
| rs7237379  | 18 | 31322540  | 0.0008891 | 0.04144  | 0.0007666 | ASXL3(0)                          |
| rs9613135  | 22 | 26624817  | 0.0008892 | -0.08811 | 0.000816  | SEZ6L(0)                          |
| rs1325180  | 6  | 87440015  | 0.0008896 | 0.04105  | 0.0009617 | .                                 |
| rs1937785  | 9  | 8232889   | 0.0008904 | 0.05627  | 0.0009034 | .                                 |
| rs11190025 | 10 | 101005537 | 0.0008908 | 0.05091  | 0.000852  | HPSE2(+9.918kb)                   |
| rs963896   | 1  | 170102532 | 0.0008908 | -0.07289 | 0.0008342 | .                                 |
| rs4419383  | 3  | 68251421  | 0.000891  | -0.1049  | 0.0008512 | FAM19A1(0)                        |
| rs11125703 | 2  | 57480673  | 0.0008913 | 0.05475  | 0.0007349 | .                                 |
| rs11125704 | 2  | 57480682  | 0.0008913 | -0.06069 | 0.0007349 | .                                 |
| rs11125707 | 2  | 57480767  | 0.0008913 | -0.06069 | 0.0007349 | .                                 |
| rs1889763  | 14 | 33471190  | 0.0008913 | -0.06069 | 0.0008773 | NPAS3(0)                          |
| rs7438298  | 4  | 58398144  | 0.0008918 | -0.05113 | 0.0008217 | .                                 |
| rs6968664  | 7  | 12515493  | 0.0008922 | -0.06027 | 0.0009269 | .                                 |
| rs55885446 | 14 | 96330443  | 0.0008925 | 0.08417  | 0.0009404 | .                                 |
| rs6756651  | 2  | 179161167 | 0.0008925 | 0.0414   | 0.0008825 | OSBPL6(0)                         |



|            |    |           |           |          |           |                                 |
|------------|----|-----------|-----------|----------|-----------|---------------------------------|
| rs7189893  | 16 | 13667520  | 0.0008926 | 0.06197  | 0.000769  | .                               |
| rs10080066 | 5  | 8438752   | 0.0008927 | -0.1489  | 0.0008612 | .                               |
| rs62319741 | 4  | 124571895 | 0.0008929 | -0.1046  | 0.0008575 | .                               |
| rs2344809  | 4  | 158440767 | 0.0008939 | 0.06828  | 0.000907  | .                               |
| rs4584903  | 18 | 31718525  | 0.0008942 | 0.04031  | 0.00082   | NOL4(0)                         |
| rs1998640  | 13 | 107875293 | 0.000895  | 0.0414   | 0.0008536 | FAM155A(0)                      |
| rs6129356  | 20 | 38145814  | 0.0008958 | 0.04144  | 0.0009054 | .                               |
| rs2690290  | 7  | 95448877  | 0.0008962 | -0.04202 | 0.0008711 | DYNC1I1(0)                      |
| rs4735750  | 8  | 77914918  | 0.0008972 | 0.0423   | 0.000866  | PXMP3(+2.394kb)                 |
| rs12656194 | 5  | 124221498 | 0.0008978 | -0.06566 | 0.0008254 | .                               |
| rs9421426  | 10 | 123162051 | 0.0008979 | -0.1559  | 0.0009656 | .                               |
| rs12240529 | 10 | 20782162  | 0.0008985 | -0.1461  | 0.0009191 | .                               |
| rs3092055  | 20 | 41315694  | 0.0008985 | 0.04168  | 0.0008996 | PTPRT(0)                        |
| rs816188   | 12 | 117991879 | 0.0008985 | -0.04248 | 0.0009153 | KSR2(0)                         |
| rs12627805 | 22 | 31560831  | 0.0008986 | 0.08574  | 0.0008881 | RNF185(0)                       |
| rs9530325  | 13 | 75064618  | 0.000899  | 0.04095  | 0.0007825 | .                               |
| rs9530328  | 13 | 75064951  | 0.000899  | 0.04095  | 0.0007825 | .                               |
| rs10512532 | 17 | 67891380  | 0.0008997 | -0.05393 | 0.000913  | .                               |
| rs4630205  | 10 | 91092706  | 0.0009003 | -0.04769 | 0.0008639 | IFIT3(0)                        |
| rs17084542 | 4  | 55494179  | 0.0009004 | 0.05953  | 0.0009972 | .                               |
| rs57529261 | 4  | 55494855  | 0.0009004 | 0.05953  | 0.0009972 | .                               |
| rs2172258  | 3  | 97657476  | 0.0009006 | -0.04286 | 0.0009077 | MINA(-3.184kb) DKFZp667G2110(0) |
| rs12434861 | 14 | 27312939  | 0.0009008 | 0.04787  | 0.0008434 | .                               |
| rs12764423 | 10 | 132847172 | 0.0009009 | -0.04944 | 0.0009187 | .                               |
| rs621994   | 20 | 19501009  | 0.0009009 | -0.1548  | 0.0008305 | SLC24A3(0)                      |
| rs6697099  | 1  | 213083036 | 0.0009009 | 0.07178  | 0.0009072 | FLVCR1(+14.28kb)                |
| rs2059860  | 5  | 180325    | 0.000901  | 0.04687  | 0.0007639 | PLEKHG4B(0) LOC389257(-11.3kb)  |
| rs9360139  | 6  | 66284186  | 0.0009012 | 0.0489   | 0.0008775 | EGFL11(0)                       |
| rs55950621 | 16 | 13728931  | 0.0009013 | 0.06243  | 0.00075   | .                               |
| rs7500279  | 16 | 13726906  | 0.0009013 | 0.06243  | 0.00075   | .                               |
| rs2451176  | 8  | 119242005 | 0.0009014 | 0.04729  | 0.0007989 | SAMD12(0)                       |
| rs4286679  | 5  | 33354681  | 0.0009014 | 0.08773  | 0.0007768 | .                               |
| rs2749530  | 14 | 94816299  | 0.0009022 | 0.04059  | 0.0009304 | .                               |
| rs4688913  | 3  | 18116746  | 0.0009022 | 0.0569   | 0.0009216 | .                               |
| rs60540755 | 16 | 66579214  | 0.0009031 | 0.1271   | 0.0009712 | TK2(0) CKLF(-7.251kb)           |
| rs12694296 | 2  | 213991377 | 0.0009037 | 0.04232  | 0.0009295 | IKZF2(0)                        |
| rs28679508 | 8  | 118464199 | 0.0009038 | 0.04362  | 0.0009353 | .                               |
| rs10160052 | 10 | 20821118  | 0.000904  | -0.1314  | 0.0008739 | .                               |
| rs9434751  | 1  | 9334566   | 0.0009041 | 0.04411  | 0.0008483 | SPSB1(-18.42kb) H6PD(+3.172kb)  |
| rs9543662  | 13 | 75066010  | 0.0009042 | -0.04014 | 0.000817  | .                               |
| rs854397   | 14 | 25287755  | 0.0009043 | 0.04271  | 0.000938  | STXBP6(0)                       |
| rs2224169  | 20 | 41183026  | 0.0009044 | -0.04734 | 0.0008755 | PTPRT(0)                        |
| rs7973032  | 12 | 82323133  | 0.0009052 | 0.1028   | 0.0009765 | .                               |
| rs10089529 | 8  | 91573803  | 0.0009053 | 0.1309   | 0.0009259 | .                               |
| rs11157452 | 14 | 46144899  | 0.0009056 | 0.103    | 0.0006736 | .                               |
| rs16915314 | 10 | 62424403  | 0.0009056 | 0.04859  | 0.0009454 | .                               |
| rs11067588 | 12 | 115856129 | 0.0009063 | -0.04877 | 0.0008065 | .                               |

|            |    |           |           |          |           |                  |
|------------|----|-----------|-----------|----------|-----------|------------------|
| rs9840749  | 3  | 189943873 | 0.0009063 | 0.06162  | 0.0008842 | .                |
| rs62449509 | 7  | 12515013  | 0.0009071 | -0.06021 | 0.0009386 | .                |
| rs1749576  | 1  | 236421189 | 0.0009082 | 0.04864  | 0.0009452 | ERO1LB(0)        |
| rs2345114  | 14 | 57141928  | 0.0009082 | 0.05147  | 0.0008297 | .                |
| rs13289592 | 9  | 5966898   | 0.0009087 | -0.06493 | 0.0008948 | KIAA2026(0)      |
| rs324421   | 1  | 46888905  | 0.0009112 | -0.08645 | 0.0009061 | FAAH(+9.385kb)   |
| rs3750733  | 10 | 33623251  | 0.0009112 | -0.08037 | 0.0009586 | NRP1(0)          |
| rs4522824  | 4  | 164074747 | 0.0009115 | -0.04204 | 0.0009025 | NAF1(0)          |
| rs12296880 | 12 | 32352156  | 0.0009116 | 0.09378  | 0.0009267 | BICD1(0)         |
| rs4688898  | 3  | 18116950  | 0.0009121 | 0.05749  | 0.0009371 | .                |
| rs55850020 | 17 | 32710790  | 0.0009127 | 0.09842  | 0.0008688 | .                |
| rs56100872 | 17 | 32710791  | 0.0009127 | 0.09842  | 0.0008688 | .                |
| rs7338422  | 13 | 38061397  | 0.0009128 | 0.07695  | 0.0008722 | .                |
| rs10111994 | 8  | 51558259  | 0.0009129 | 0.06019  | 0.0008694 | SNTG1(0)         |
| rs10808845 | 8  | 51558649  | 0.0009129 | 0.06019  | 0.0008694 | SNTG1(0)         |
| rs6450980  | 5  | 33355301  | 0.0009132 | 0.04705  | 0.0007484 | .                |
| rs2250298  | 21 | 34348105  | 0.0009139 | 0.04877  | 0.0008712 | .                |
| rs6553578  | 4  | 172508582 | 0.0009144 | 0.04993  | 0.0009238 | .                |
| rs4373974  | 11 | 113430486 | 0.0009151 | -0.04059 | 0.0008963 | .                |
| rs7073534  | 10 | 91091217  | 0.0009154 | -0.04833 | 0.0009181 | IFIT3(0)         |
| rs12650858 | 4  | 124461148 | 0.0009156 | 0.05931  | 0.0009885 | .                |
| rs56007488 | 4  | 124462116 | 0.0009156 | 0.05931  | 0.0009885 | .                |
| rs1781273  | 9  | 8235328   | 0.0009158 | 0.05705  | 0.0009191 | .                |
| rs11141004 | 9  | 88131956  | 0.0009161 | 0.08881  | 0.0008579 | .                |
| rs2089040  | 3  | 143932046 | 0.0009161 | 0.1153   | 0.0009958 | .                |
| rs35118959 | 10 | 130024129 | 0.0009163 | 0.1071   | 0.0008009 | .                |
| rs58622622 | 3  | 116427365 | 0.0009163 | -0.09693 | 0.0008872 | .                |
| rs4280213  | 15 | 24990071  | 0.0009165 | -0.04174 | 0.0008672 | .                |
| rs7640718  | 3  | 189940916 | 0.000917  | 0.04441  | 0.0009044 | .                |
| rs10736584 | 11 | 99854722  | 0.0009176 | 0.04166  | 0.0009335 | CNTN5(0)         |
| rs362089   | 22 | 20950473  | 0.0009176 | 0.0524   | 0.0009235 | MED15(+8.554kb)  |
| rs11032383 | 11 | 33802300  | 0.0009178 | -0.04095 | 0.0008925 | FBXO3(+6.229kb)  |
| rs12032417 | 1  | 107019288 | 0.000918  | -0.05794 | 0.0009867 | .                |
| rs6988748  | 8  | 91608540  | 0.0009186 | 0.1282   | 0.0009462 | .                |
| rs6989081  | 8  | 91608795  | 0.0009186 | 0.1282   | 0.0009462 | .                |
| rs7007768  | 8  | 91609056  | 0.0009186 | 0.1282   | 0.0009462 | .                |
| rs11680778 | 2  | 179160218 | 0.0009193 | 0.04166  | 0.0008821 | OSBPL6(0)        |
| rs17448913 | 7  | 12533984  | 0.0009193 | -0.05475 | 0.0009624 | .                |
| rs3868081  | 6  | 31206138  | 0.0009193 | -0.05992 | 0.0009879 | .                |
| rs6961238  | 7  | 12535428  | 0.00092   | -0.05999 | 0.0009796 | .                |
| rs1079391  | 8  | 91627960  | 0.0009206 | 0.1331   | 0.0009583 | TMEM64(-7.641kb) |
| rs670589   | 13 | 70734120  | 0.0009208 | 0.1644   | 0.0009745 | .                |
| rs17126672 | 14 | 54058910  | 0.000921  | 0.05315  | 0.0008484 | .                |
| rs60486047 | 2  | 221239418 | 0.0009242 | -0.06533 | 0.0009416 | .                |
| rs2490210  | 9  | 76265838  | 0.0009259 | 0.1965   | 0.0007913 | .                |
| rs11779190 | 8  | 51554112  | 0.0009263 | -0.07686 | 0.0009493 | SNTG1(0)         |
| rs11786241 | 8  | 51554074  | 0.0009263 | 0.0606   | 0.0009493 | SNTG1(0)         |

|            |    |           |           |          |           |                             |
|------------|----|-----------|-----------|----------|-----------|-----------------------------|
| rs4833285  | 4  | 124565490 | 0.0009263 | 0.0606   | 0.0008855 | .                           |
| rs12135900 | 1  | 77822701  | 0.000927  | -0.05396 | 0.0009961 | AK5(0)                      |
| rs10521160 | 17 | 9571600   | 0.0009272 | 0.05573  | 0.0008407 | USP43(0)                    |
| rs10851561 | 15 | 54515603  | 0.0009273 | -0.1665  | 0.0009143 | UNC13C(0)                   |
| rs9332426  | 2  | 199651604 | 0.0009277 | 0.04198  | 0.000848  | .                           |
| rs12099079 | 11 | 98498807  | 0.0009284 | -0.08597 | 0.0008372 | .                           |
| rs16925360 | 11 | 34282979  | 0.0009284 | 0.05542  | 0.0008153 | ABTB2(0)                    |
| rs2706878  | 7  | 95448362  | 0.0009288 | -0.04129 | 0.0008933 | DYNC1I1(0)                  |
| rs9956918  | 18 | 31315878  | 0.0009298 | -0.04042 | 0.0008538 | ASXL3(0)                    |
| rs60667136 | 16 | 66548936  | 0.0009305 | 0.1145   | 0.000961  | TK2(0)                      |
| rs10883887 | 10 | 105357181 | 0.0009306 | 0.04107  | 0.0009135 | SH3PXD2A(0) NEURL(+4.878kb) |
| rs11757524 | 6  | 33766212  | 0.0009311 | -0.04963 | 0.0009506 | MLN(0) LEMD2(+9.316kb)      |
| rs28801370 | 3  | 189962645 | 0.0009331 | 0.06248  | 0.0009173 | .                           |
| rs2841666  | 6  | 43231741  | 0.0009338 | 0.04203  | 0.0008751 | TTBK1(0)                    |
| rs9298499  | 8  | 48850795  | 0.0009343 | -0.08996 | 0.0009443 | PRKDC(0)                    |
| rs7357214  | 7  | 48997648  | 0.0009345 | 0.04087  | 0.0008717 | .                           |
| rs2774960  | 7  | 138602417 | 0.0009346 | 0.0415   | 0.0009941 | KIAA1549(0)                 |
| rs10053774 | 5  | 58192460  | 0.0009349 | -0.08261 | 0.0009847 | .                           |
| rs13070093 | 3  | 60939763  | 0.0009351 | -0.04436 | 0.0008585 | FHIT(0)                     |
| rs1241186  | 1  | 103312721 | 0.0009355 | 0.05144  | 0.0007942 | .                           |
| rs1241199  | 1  | 103306831 | 0.0009355 | 0.05144  | 0.0007942 | .                           |
| rs1241200  | 1  | 103306477 | 0.0009355 | 0.05144  | 0.0007942 | .                           |
| rs1263061  | 1  | 103302200 | 0.0009355 | 0.05144  | 0.0007942 | .                           |
| rs12731405 | 1  | 103313071 | 0.0009355 | 0.05144  | 0.0007942 | .                           |
| rs1676510  | 1  | 103302534 | 0.0009355 | 0.05144  | 0.0007942 | .                           |
| rs6536704  | 4  | 164083616 | 0.0009358 | -0.04158 | 0.0009535 | NAF1(0)                     |
| rs7818952  | 8  | 11672899  | 0.0009368 | -0.05602 | 0.0009515 | FDFT1(0)                    |
| rs10510720 | 3  | 41563441  | 0.0009371 | 0.07794  | 0.0009334 | ULK4(0)                     |
| rs17058410 | 3  | 41563553  | 0.0009371 | 0.07794  | 0.0009334 | ULK4(0)                     |
| rs2451025  | 9  | 76264643  | 0.0009395 | 0.1963   | 0.0008036 | .                           |
| rs10135646 | 14 | 25872178  | 0.0009397 | 0.0905   | 0.0007962 | .                           |
| rs10111366 | 8  | 77982625  | 0.0009401 | -0.04651 | 0.00093   | .                           |
| rs10915691 | 1  | 224863475 | 0.0009401 | 0.1214   | 0.0008933 | CNIH3(0)                    |
| rs2288399  | 16 | 66565492  | 0.0009401 | 0.04195  | 0.0009967 | TK2(0)                      |
| rs1869679  | 6  | 67385793  | 0.0009403 | 0.04371  | 0.0008413 | .                           |
| rs62131135 | 2  | 29794521  | 0.0009427 | -0.07277 | 0.0009327 | ALK(0)                      |
| rs12321350 | 12 | 114063496 | 0.0009434 | -0.04124 | 0.0008954 | .                           |
| rs16962380 | 16 | 13662679  | 0.0009438 | 0.06438  | 0.0008195 | .                           |
| rs9465461  | 6  | 19602406  | 0.0009441 | -0.07922 | 0.0008652 | .                           |
| rs12294719 | 11 | 36728261  | 0.0009447 | 0.05368  | 0.000891  | .                           |
| rs13083523 | 3  | 68281021  | 0.0009454 | 0.045    | 0.0009162 | FAM19A1(0)                  |
| rs1565784  | 18 | 31358491  | 0.0009455 | -0.04152 | 0.0008756 | .                           |
| rs7085361  | 10 | 91091212  | 0.0009456 | -0.0483  | 0.0009435 | IFIT3(0)                    |
| rs10853297 | 18 | 3399058   | 0.0009461 | -0.0517  | 0.0008135 | TGIF1(-13.01kb)             |
| rs11125701 | 2  | 57480267  | 0.0009465 | -0.06038 | 0.0007827 | .                           |
| rs4702597  | 5  | 8906784   | 0.0009472 | 0.0419   | 0.0008683 | .                           |
| rs28754765 | 8  | 80277213  | 0.0009486 | 0.04425  | 0.0008127 | .                           |

|            |    |           |           |          |           |                                 |
|------------|----|-----------|-----------|----------|-----------|---------------------------------|
| rs2042190  | 19 | 33532716  | 0.0009493 | -0.05332 | 0.0008839 | RHPN2(0)                        |
| rs6473847  | 8  | 54457471  | 0.0009511 | -0.09225 | 0.0007904 | .                               |
| rs2743617  | 6  | 19600328  | 0.0009521 | -0.07892 | 0.0008748 | .                               |
| rs7788690  | 7  | 84974571  | 0.0009523 | 0.04321  | 0.000953  | .                               |
| rs59847611 | 17 | 72208803  | 0.0009528 | -0.1929  | 0.0009943 | TTYH2(-0.892kb) RPL38(+2.784kb) |
| rs60217659 | 17 | 72209091  | 0.0009528 | -0.1929  | 0.0009943 | TTYH2(-0.604kb) RPL38(+3.072kb) |
| rs58306488 | 2  | 57462920  | 0.0009541 | -0.06036 | 0.0007918 | .                               |
| rs13211568 | 6  | 22573180  | 0.0009548 | -0.04455 | 0.0008153 | HDGFL1(+2.43kb)                 |
| rs2817271  | 6  | 19580222  | 0.0009558 | -0.07952 | 0.0008917 | .                               |
| rs7167110  | 15 | 54700120  | 0.0009566 | -0.1365  | 0.0009742 | UNC13C(0)                       |
| rs4499602  | 3  | 170510715 | 0.0009568 | -0.04062 | 0.0007956 | .                               |
| rs7238931  | 18 | 31334993  | 0.0009568 | 0.05256  | 0.0008551 | ASXL3(+7.594kb)                 |
| rs11125702 | 2  | 57480335  | 0.000957  | -0.0603  | 0.0007958 | .                               |
| rs2501653  | 6  | 92548874  | 0.000957  | -0.05425 | 0.0009927 | .                               |
| rs1562631  | 7  | 17625122  | 0.0009586 | 0.0442   | 0.0009753 | .                               |
| rs6027060  | 20 | 58302395  | 0.0009591 | 0.04429  | 0.0009401 | PHACTR3(0)                      |
| rs259216   | 19 | 33138921  | 0.0009595 | -0.0428  | 0.0008561 | ANKRD27(0)                      |
| rs1562630  | 7  | 17625437  | 0.0009596 | 0.04502  | 0.0009512 | .                               |
| rs4687129  | 3  | 189950046 | 0.0009597 | 0.06499  | 0.0009596 | .                               |
| rs539547   | 3  | 170470536 | 0.0009612 | 0.05135  | 0.0008122 | .                               |
| rs13211957 | 6  | 22573415  | 0.0009629 | -0.04427 | 0.0008287 | HDGFL1(+2.665kb)                |
| rs6667008  | 1  | 86392912  | 0.0009643 | 0.04408  | 0.0009671 | COL24A1(0)                      |
| rs13302199 | 9  | 88167717  | 0.0009647 | 0.1172   | 0.0009041 | AGTPBP1(0)                      |
| rs34915251 | 9  | 88187825  | 0.0009647 | 0.1172   | 0.0009041 | AGTPBP1(0)                      |
| rs35489371 | 9  | 88198365  | 0.0009647 | 0.1172   | 0.0009041 | AGTPBP1(0)                      |
| rs7037340  | 9  | 88170937  | 0.0009647 | 0.1172   | 0.0009041 | AGTPBP1(0)                      |
| rs9354249  | 6  | 66166861  | 0.0009656 | 0.04927  | 0.0009832 | EGFL11(0)                       |
| rs1750330  | 1  | 119493411 | 0.0009658 | -0.0413  | 0.0008896 | TBX15(0)                        |
| rs6660933  | 1  | 213082908 | 0.0009666 | -0.04922 | 0.0009545 | FLVCR1(+14.15kb)                |
| rs6663568  | 1  | 213082921 | 0.0009666 | -0.04922 | 0.0009545 | FLVCR1(+14.16kb)                |
| rs4654938  | 1  | 21785981  | 0.0009668 | -0.04387 | 0.0009254 | NBPF3(0)                        |
| rs10105989 | 8  | 139148343 | 0.0009684 | 0.04188  | 0.0008705 | FAM135B(0)                      |
| rs3092230  | 20 | 39583017  | 0.0009691 | 0.04352  | 0.0009075 | .                               |
| rs1241179  | 1  | 103322341 | 0.0009715 | 0.05144  | 0.0008215 | COL11A1(-19.68kb)               |
| rs1241194  | 1  | 103317472 | 0.0009715 | 0.05144  | 0.0008215 | .                               |
| rs1261690  | 1  | 103324881 | 0.0009715 | 0.05144  | 0.0008215 | COL11A1(-17.14kb)               |
| rs899019   | 1  | 103319338 | 0.0009715 | 0.05144  | 0.0008215 | .                               |
| rs12439336 | 15 | 24986453  | 0.0009722 | -0.04156 | 0.0009668 | .                               |
| rs10155216 | 4  | 158451145 | 0.0009743 | 0.07247  | 0.0007678 | .                               |
| rs2191299  | 7  | 48997892  | 0.0009762 | 0.04075  | 0.0009113 | .                               |
| rs1154758  | 5  | 162716850 | 0.0009763 | -0.04012 | 0.0009585 | .                               |
| rs9342482  | 6  | 66223843  | 0.0009768 | 0.04797  | 0.0009612 | EGFL11(0)                       |
| rs506071   | 1  | 110372709 | 0.0009769 | -0.04479 | 0.0009301 | .                               |
| rs12494960 | 3  | 116435140 | 0.0009786 | -0.09743 | 0.0009274 | .                               |
| rs12032751 | 1  | 86407927  | 0.0009789 | 0.04384  | 0.0009564 | COL24A1(0)                      |
| rs1039265  | 1  | 224840295 | 0.0009791 | -0.04677 | 0.000921  | CNIH3(0)                        |
| rs1988374  | 6  | 66188166  | 0.0009793 | 0.04739  | 0.0009048 | EGFL11(0)                       |

|            |    |           |           |          |           |                                  |
|------------|----|-----------|-----------|----------|-----------|----------------------------------|
| rs7240763  | 18 | 31741946  | 0.0009798 | 0.04028  | 0.0008809 | NOL4(0)                          |
| rs6590493  | 11 | 99864585  | 0.00098   | 0.04123  | 0.0009778 | CNTN5(0)                         |
| rs698697   | 11 | 99863147  | 0.00098   | 0.04123  | 0.0009778 | CNTN5(0)                         |
| rs413533   | 18 | 20280387  | 0.0009804 | 0.04466  | 0.0009387 | .                                |
| rs11199872 | 10 | 123031190 | 0.0009805 | -0.05016 | 0.0009441 | .                                |
| rs17414362 | 2  | 43969482  | 0.0009808 | -0.05044 | 0.0008412 | PLEKHH2(0)                       |
| rs4782795  | 16 | 83491266  | 0.0009814 | -0.04164 | 0.0009438 | CDH13(0)                         |
| rs9530322  | 13 | 75062950  | 0.0009817 | -0.03997 | 0.0009104 | .                                |
| rs2877396  | 17 | 50831842  | 0.0009828 | 0.04964  | 0.0009861 | .                                |
| rs6536732  | 4  | 164366036 | 0.0009847 | -0.06786 | 0.0009719 | .                                |
| rs261178   | 5  | 4328117   | 0.0009854 | -0.04139 | 0.0009241 | .                                |
| rs4729207  | 7  | 95443391  | 0.0009861 | 0.04183  | 0.0009938 | DYNC11(0)                        |
| rs2616002  | 1  | 103326581 | 0.0009867 | 0.05138  | 0.0008339 | COL11A1(-15.44kb)                |
| rs8000424  | 13 | 71912064  | 0.0009868 | -0.09948 | 0.0009137 | .                                |
| rs1676507  | 1  | 103328063 | 0.0009879 | 0.05132  | 0.0008414 | COL11A1(-13.96kb)                |
| rs1676508  | 1  | 103328070 | 0.0009879 | 0.05132  | 0.0008414 | COL11A1(-13.95kb)                |
| rs4689601  | 4  | 7116025   | 0.0009883 | -0.06672 | 0.0008939 | .                                |
| rs12973480 | 19 | 18809694  | 0.0009892 | 0.0681   | 0.0008326 | CRTC1(0)                         |
| rs28374736 | 4  | 185499739 | 0.0009896 | -0.04605 | 0.0009328 | .                                |
| rs10265774 | 7  | 156525513 | 0.00099   | 0.05901  | 0.0008882 | LMBR1(0)                         |
| rs16832570 | 1  | 160927294 | 0.0009905 | -0.107   | 0.0008764 | ITLN2(+2.705kb)                  |
| rs12275435 | 11 | 132916692 | 0.0009921 | -0.05518 | 0.0009443 | OPCML(0)                         |
| rs2736901  | 14 | 94820806  | 0.0009921 | 0.04731  | 0.0009607 | .                                |
| rs2385029  | 1  | 236044714 | 0.0009936 | 0.06855  | 0.000982  | LYST(+14.49kb)                   |
| rs4962246  | 9  | 140451881 | 0.0009948 | 0.0489   | 0.0008083 | WDR85(0) PNPLA7(+6.895kb) MRPL41 |
| rs8021246  | 14 | 46161379  | 0.0009966 | 0.0479   | 0.0007506 | .                                |
| rs7526224  | 1  | 145431073 | 0.0009977 | -0.1259  | 0.0009981 | TXNIP(-7.388kb) HFE2(+13.53kb)   |

### PC3

| SNP        | CHR | BP        | p_plink   | beta_plink | p_emmax  | Annotation           |
|------------|-----|-----------|-----------|------------|----------|----------------------|
| rs12955474 | 18  | 57152038  | 3.57E-07  | -0.09901   | 3.16E-07 | CCBE1(0)             |
| rs62459614 | 7   | 70587145  | 1.62E-06  | 0.1895     | 1.55E-06 | WBSCR17(-10.64kb)    |
| rs62459619 | 7   | 70598935  | 1.65E-06  | 0.1893     | 1.58E-06 | WBSCR17(0)           |
| rs6904029  | 6   | 29943067  | 2.57E-06  | -0.04637   | 1.97E-06 | HLA-A29.1(0) HCG9(0) |
| rs62459621 | 7   | 70601619  | 3.28E-06  | 0.1865     | 3.06E-06 | WBSCR17(0)           |
| rs62459620 | 7   | 70600296  | 3.29E-06  | 0.1862     | 3.16E-06 | WBSCR17(0)           |
| rs17142527 | 7   | 70581632  | 3.52E-06  | 0.181      | 3.39E-06 | WBSCR17(-16.16kb)    |
| rs4719068  | 7   | 70578999  | 3.52E-06  | 0.181      | 3.39E-06 | WBSCR17(-18.79kb)    |
| rs4719069  | 7   | 70579250  | 3.52E-06  | 0.181      | 3.39E-06 | WBSCR17(-18.54kb)    |
| rs4719071  | 7   | 70583888  | 3.52E-06  | 0.181      | 3.39E-06 | WBSCR17(-13.9kb)     |
| rs17170356 | 7   | 146887868 | 3.62E-06  | 0.1547     | 3.43E-06 | CNTNAP2(0)           |
| rs12457023 | 18  | 57147679  | 3.97E-06  | -0.1127    | 3.47E-06 | CCBE1(0)             |
| rs4674973  | 2   | 226019278 | 3.99E-06  | 0.04273    | 5.29E-06 | .                    |
| rs35333254 | 4   | 14438810  | 4.91E-06  | 0.06521    | 4.83E-06 | .                    |
| rs12622774 | 2   | 226015740 | 0.0000051 | 0.04247    | 6.46E-06 | .                    |
| rs34205853 | 4   | 14467695  | 0.0000051 | 0.0643     | 5.62E-06 | .                    |

|            |    |           |           |          |           |                                  |
|------------|----|-----------|-----------|----------|-----------|----------------------------------|
| rs12694651 | 2  | 226017980 | 5.41E-06  | 0.04187  | 7.05E-06  | .                                |
| rs4674974  | 2  | 226019283 | 5.47E-06  | 0.04175  | 7.22E-06  | .                                |
| rs1501172  | 4  | 14438109  | 5.85E-06  | 0.06466  | 5.99E-06  | .                                |
| rs28403928 | 2  | 226015427 | 5.91E-06  | 0.04162  | 7.71E-06  | .                                |
| rs7594648  | 2  | 156535853 | 6.04E-06  | 0.0443   | 5.45E-06  | .                                |
| rs4674975  | 2  | 226019547 | 0.0000067 | 0.04142  | 8.76E-06  | .                                |
| rs11900861 | 2  | 226014843 | 6.77E-06  | 0.0421   | 6.91E-06  | .                                |
| rs753163   | 2  | 226027242 | 7.05E-06  | 0.04143  | 9.14E-06  | .                                |
| rs726553   | 2  | 226016494 | 7.11E-06  | 0.04134  | 9.09E-06  | .                                |
| rs13390791 | 2  | 226013068 | 7.69E-06  | 0.04154  | 0.0000103 | .                                |
| rs5008002  | 7  | 70590557  | 8.15E-06  | 0.1719   | 7.92E-06  | WBSCR17(-7.231kb)                |
| rs13118489 | 4  | 14471739  | 8.22E-06  | 0.06245  | 9.13E-06  | .                                |
| rs1958581  | 14 | 34801599  | 8.27E-06  | -0.1353  | 7.83E-06  | .                                |
| rs62459615 | 7  | 70591637  | 8.28E-06  | 0.1719   | 7.99E-06  | WBSCR17(-6.151kb)                |
| rs62459616 | 7  | 70595329  | 8.28E-06  | 0.1719   | 7.99E-06  | WBSCR17(-2.459kb)                |
| rs10208211 | 2  | 226021689 | 0.0000083 | 0.041    | 0.0000113 | .                                |
| rs11883449 | 2  | 226022785 | 8.53E-06  | 0.04097  | 0.0000115 | .                                |
| rs753161   | 2  | 226027448 | 8.76E-06  | 0.04104  | 0.0000113 | .                                |
| rs3823355  | 6  | 29942083  | 8.82E-06  | -0.04339 | 7.08E-06  | HLA-A29.1(0) HCG9(-0.808kb)      |
| rs7596187  | 2  | 226023225 | 9.49E-06  | 0.04074  | 0.0000128 | .                                |
| rs13424636 | 2  | 226002959 | 9.88E-06  | 0.04089  | 0.0000139 | .                                |
| rs7340337  | 2  | 226049711 | 0.00001   | 0.04135  | 0.000013  | .                                |
| rs4962340  | 10 | 128152645 | 0.0000101 | 0.0396   | 0.0000144 | C10orf90(0)                      |
| rs2139036  | 2  | 156511426 | 0.0000103 | 0.04321  | 9.21E-06  | .                                |
| rs57175349 | 4  | 90860516  | 0.0000103 | 0.08373  | 0.0000097 | MMRN1(0)                         |
| rs10194215 | 2  | 226007402 | 0.0000106 | 0.04053  | 0.0000154 | .                                |
| rs13396047 | 2  | 226002138 | 0.0000107 | 0.04061  | 0.0000157 | .                                |
| rs1579953  | 2  | 226011333 | 0.0000108 | 0.04111  | 0.0000118 | .                                |
| rs13390498 | 2  | 226050066 | 0.0000109 | 0.04114  | 0.000014  | .                                |
| rs3823353  | 6  | 29942045  | 0.0000113 | -0.04295 | 9.01E-06  | HLA-A29.1(0) HCG9(-0.846kb)      |
| rs3823354  | 6  | 29942051  | 0.0000114 | -0.04291 | 9.13E-06  | HLA-A29.1(0) HCG9(-0.84kb)       |
| rs34917966 | 4  | 14519856  | 0.0000117 | 0.06135  | 0.0000126 | .                                |
| rs17226595 | 2  | 156524806 | 0.0000119 | 0.04239  | 0.0000121 | .                                |
| rs10933081 | 2  | 226021024 | 0.000012  | 0.04032  | 0.0000158 | .                                |
| rs10933082 | 2  | 226021070 | 0.000012  | 0.04032  | 0.0000158 | .                                |
| rs55807827 | 4  | 14519714  | 0.0000121 | 0.06167  | 0.0000129 | .                                |
| rs17417384 | 4  | 14511859  | 0.0000123 | 0.04025  | 0.0000132 | .                                |
| rs17417818 | 4  | 14538520  | 0.0000123 | 0.06154  | 0.0000132 | .                                |
| rs4585020  | 2  | 226008873 | 0.0000123 | 0.06127  | 0.0000178 | .                                |
| rs6916422  | 6  | 29938110  | 0.0000123 | -0.04259 | 0.0000101 | HLA-A29.1(0) HCG9(-4.781kb)      |
| rs2394247  | 6  | 29930706  | 0.0000124 | -0.04258 | 0.0000101 | HLA-A29.1(0) HLA-A(+17.05kb) HCG |
| rs4713269  | 6  | 29930496  | 0.0000128 | -0.04276 | 0.0000102 | HLA-A29.1(0) HLA-A(+16.84kb) HCG |
| rs4713270  | 6  | 29934697  | 0.0000133 | -0.04239 | 0.0000114 | HLA-A29.1(0) HCG9(-8.194kb)      |
| rs12193100 | 6  | 29936914  | 0.0000134 | -0.04237 | 0.0000109 | HLA-A29.1(0) HCG9(-5.977kb)      |
| rs17016396 | 4  | 90863170  | 0.0000138 | 0.08269  | 0.0000142 | MMRN1(0)                         |
| rs6916451  | 6  | 29938174  | 0.0000141 | -0.04222 | 0.0000122 | HLA-A29.1(0) HCG9(-4.717kb)      |
| rs4959038  | 6  | 29936351  | 0.0000142 | -0.04225 | 0.0000115 | HLA-A29.1(0) HCG9(-6.54kb)       |

|            |    |           |           |          |           |                                  |
|------------|----|-----------|-----------|----------|-----------|----------------------------------|
| rs6935053  | 6  | 29934163  | 0.0000143 | -0.04266 | 0.0000117 | HLA-A29.1(0) HCG9(-8.728kb)      |
| rs1931665  | 10 | 99882641  | 0.0000144 | -0.03897 | 0.0000128 | C10orf28(-11.74kb)               |
| rs13410376 | 2  | 56305969  | 0.0000153 | -0.189   | 0.0000137 | .                                |
| rs6935024  | 6  | 29934080  | 0.0000153 | -0.04211 | 0.0000124 | HLA-A29.1(0) HCG9(-8.811kb)      |
| rs3823369  | 6  | 29943916  | 0.0000159 | -0.04217 | 0.0000128 | HLA-A29.1(0) HCG9(0)             |
| rs12195260 | 6  | 29938455  | 0.000016  | -0.04209 | 0.0000131 | HLA-A29.1(0) HCG9(-4.436kb)      |
| rs4248143  | 6  | 29935891  | 0.0000161 | -0.04195 | 0.0000134 | HLA-A29.1(0) HCG9(-7kb)          |
| rs10168130 | 2  | 226054275 | 0.0000165 | 0.04033  | 0.000021  | .                                |
| rs12206499 | 6  | 29937127  | 0.0000165 | -0.04201 | 0.0000134 | HLA-A29.1(0) HCG9(-5.764kb)      |
| rs10516278 | 4  | 14520438  | 0.0000166 | 0.06184  | 0.0000177 | .                                |
| rs6436522  | 2  | 225989070 | 0.0000167 | 0.04004  | 0.000019  | .                                |
| rs7420455  | 2  | 226038159 | 0.0000168 | 0.04019  | 0.0000218 | .                                |
| rs4919185  | 10 | 99958168  | 0.0000177 | -0.03919 | 0.0000136 | C10orf28(0)                      |
| rs10170171 | 2  | 226037183 | 0.0000178 | 0.03982  | 0.0000243 | .                                |
| rs12611785 | 2  | 226009233 | 0.0000178 | 0.0405   | 0.0000266 | .                                |
| rs2071568  | 6  | 29943281  | 0.0000178 | -0.04223 | 0.0000152 | HLA-A29.1(0) HCG9(0)             |
| rs34982598 | 4  | 14490777  | 0.0000182 | 0.06073  | 0.0000199 | .                                |
| rs35066870 | 6  | 29942639  | 0.0000182 | -0.04184 | 0.0000148 | HLA-A29.1(0) HCG9(-0.252kb)      |
| rs1252921  | 10 | 99937651  | 0.0000183 | -0.03901 | 0.0000142 | C10orf28(0)                      |
| rs35781152 | 18 | 57159095  | 0.0000192 | -0.08061 | 0.0000173 | CCBE1(0)                         |
| rs10503028 | 18 | 57154357  | 0.0000194 | -0.08054 | 0.0000175 | CCBE1(0)                         |
| rs1868426  | 2  | 226029704 | 0.0000194 | 0.03969  | 0.0000237 | .                                |
| rs6914900  | 6  | 29934170  | 0.0000194 | -0.04173 | 0.0000162 | HLA-A29.1(0) HCG9(-8.721kb)      |
| rs6935189  | 6  | 29934151  | 0.0000194 | -0.04173 | 0.0000162 | HLA-A29.1(0) HCG9(-8.74kb)       |
| rs6935198  | 6  | 29934154  | 0.0000194 | -0.04173 | 0.0000162 | HLA-A29.1(0) HCG9(-8.737kb)      |
| rs10181798 | 2  | 226049438 | 0.0000195 | 0.04003  | 0.000026  | .                                |
| rs13129670 | 4  | 14497524  | 0.0000199 | 0.06047  | 0.0000215 | .                                |
| rs36042970 | 4  | 14500642  | 0.0000199 | 0.06047  | 0.0000215 | .                                |
| rs11913039 | 22 | 27552018  | 0.00002   | 0.1501   | 0.0000174 | .                                |
| rs2523935  | 6  | 29928838  | 0.0000201 | -0.04181 | 0.0000161 | HLA-A29.1(0) HLA-A(+15.18kb) HCG |
| rs1470328  | 2  | 226051978 | 0.0000204 | 0.0401   | 0.0000263 | .                                |
| rs6903753  | 6  | 29943178  | 0.0000204 | -0.04186 | 0.0000178 | HLA-A29.1(0) HCG9(0)             |
| rs1562015  | 2  | 226042265 | 0.0000208 | 0.03976  | 0.0000259 | .                                |
| rs34515381 | 2  | 226023955 | 0.0000211 | 0.03978  | 0.0000281 | .                                |
| rs4717581  | 7  | 70589949  | 0.0000211 | 0.1661   | 0.0000205 | WBSCR17(-7.839kb)                |
| rs1557402  | 18 | 57159558  | 0.0000215 | -0.08036 | 0.0000192 | CCBE1(0)                         |
| rs7591941  | 2  | 226030694 | 0.0000215 | 0.03997  | 0.000025  | .                                |
| rs4629006  | 17 | 8548913   | 0.0000217 | 0.04147  | 0.0000188 | MYH10(+14.88kb)                  |
| rs7605880  | 2  | 226030815 | 0.0000218 | -0.04714 | 0.0000297 | .                                |
| rs9743896  | 14 | 68897426  | 0.0000218 | 0.03964  | 0.000015  | RAD51L1(0)                       |
| rs12581796 | 12 | 106271686 | 0.0000223 | -0.03834 | 0.0000147 | .                                |
| rs1501171  | 4  | 14523622  | 0.0000224 | 0.05884  | 0.0000205 | .                                |
| rs4959010  | 6  | 29940943  | 0.0000226 | -0.04145 | 0.0000182 | HLA-A29.1(0) HCG9(-1.948kb)      |
| rs60749941 | 17 | 8549352   | 0.0000227 | 0.04147  | 0.0000196 | MYH10(+15.32kb)                  |
| rs16957494 | 17 | 8549527   | 0.0000233 | 0.04155  | 0.0000195 | MYH10(+15.49kb)                  |
| rs12328707 | 2  | 226031655 | 0.0000234 | -0.03793 | 0.0000283 | .                                |
| rs2275436  | 1  | 31898463  | 0.0000234 | 0.03954  | 0.0000334 | SERINC2(0)                       |

|            |    |           |           |          |           |                             |
|------------|----|-----------|-----------|----------|-----------|-----------------------------|
| rs7340314  | 2  | 226049494 | 0.0000234 | 0.03956  | 0.0000297 | .                           |
| rs10184156 | 2  | 226034302 | 0.0000235 | 0.03952  | 0.0000286 | .                           |
| rs10190539 | 2  | 226036157 | 0.0000235 | 0.03952  | 0.0000286 | .                           |
| rs10205794 | 2  | 226036621 | 0.0000235 | 0.03952  | 0.0000286 | .                           |
| rs1443668  | 2  | 226032426 | 0.0000235 | 0.03952  | 0.0000286 | .                           |
| rs1596395  | 2  | 226035953 | 0.0000235 | 0.03952  | 0.0000286 | .                           |
| rs1838202  | 2  | 226033618 | 0.0000235 | 0.03952  | 0.0000286 | .                           |
| rs3845841  | 2  | 226031280 | 0.0000235 | 0.03952  | 0.0000286 | .                           |
| rs7592164  | 2  | 226030950 | 0.0000235 | 0.03952  | 0.0000286 | .                           |
| rs7606961  | 2  | 226034912 | 0.0000235 | 0.03952  | 0.0000286 | .                           |
| rs998465   | 2  | 226034590 | 0.0000235 | 0.03952  | 0.0000286 | .                           |
| rs998979   | 2  | 226032999 | 0.0000235 | 0.03952  | 0.0000286 | .                           |
| rs3926198  | 7  | 47841866  | 0.0000236 | 0.03743  | 0.0000231 | PKD1L1(0) FLJ21075(0)       |
| rs4641782  | 17 | 8548988   | 0.0000237 | 0.04134  | 0.0000206 | MYH10(+14.95kb)             |
| rs12195207 | 6  | 29938507  | 0.0000238 | -0.04255 | 0.0000178 | HLA-A29.1(0) HCG9(-4.384kb) |
| rs1420497  | 8  | 132692795 | 0.0000242 | -0.05251 | 0.0000296 | .                           |
| rs3793692  | 10 | 100008436 | 0.0000243 | -0.03844 | 0.0000194 | LOXL4(0) C10orf28(+3.782kb) |
| rs58930449 | 4  | 90848643  | 0.0000243 | 0.08052  | 0.000025  | MMRN1(0)                    |
| rs12646270 | 4  | 90857479  | 0.0000244 | 0.1018   | 0.0000235 | MMRN1(0)                    |
| rs6597771  | 10 | 128154513 | 0.0000245 | 0.03789  | 0.0000336 | C10orf90(0)                 |
| rs4303582  | 17 | 8548941   | 0.0000246 | 0.04116  | 0.0000218 | MYH10(+14.9kb)              |
| rs9323510  | 14 | 68891325  | 0.0000248 | -0.04664 | 0.0000175 | RAD51L1(0)                  |
| rs3812071  | 5  | 177575266 | 0.0000249 | 0.1155   | 0.0000249 | RMND5B(0) NOLA2(-1.199kb)   |
| rs2571405  | 6  | 29934109  | 0.0000252 | -0.03773 | 0.0000232 | HLA-A29.1(0) HCG9(-8.782kb) |
| rs9420727  | 10 | 99958688  | 0.0000252 | 0.04108  | 0.0000206 | C10orf28(0)                 |
| rs10196099 | 2  | 226042862 | 0.0000255 | 0.0388   | 0.0000319 | .                           |
| rs13426508 | 2  | 225991336 | 0.0000255 | 0.03928  | 0.0000336 | .                           |
| rs1348426  | 2  | 226043793 | 0.0000255 | 0.03928  | 0.0000319 | .                           |
| rs1348427  | 2  | 226043808 | 0.0000255 | 0.03928  | 0.0000319 | .                           |
| rs2120345  | 2  | 226042012 | 0.0000255 | 0.03928  | 0.0000319 | .                           |
| rs2842320  | 14 | 68944073  | 0.0000256 | -0.04756 | 0.000017  | RAD51L1(0)                  |
| rs12694659 | 2  | 226053682 | 0.0000262 | 0.03992  | 0.0000324 | .                           |
| rs13137033 | 4  | 14515202  | 0.000027  | 0.04504  | 0.0000294 | .                           |
| rs62052135 | 16 | 74534034  | 0.000027  | 0.06482  | 0.0000299 | GLG1(0)                     |
| rs10439361 | 2  | 226055210 | 0.0000271 | 0.03925  | 0.0000336 | .                           |
| rs9420721  | 10 | 99936182  | 0.0000272 | -0.0379  | 0.0000213 | C10orf28(0)                 |
| rs10450402 | 10 | 99990493  | 0.0000273 | -0.03774 | 0.0000222 | LOXL4(-16.95kb) C10orf28(0) |
| rs1320584  | 1  | 31897063  | 0.0000279 | -0.03752 | 0.0000391 | SERINC2(0)                  |
| rs7078393  | 10 | 99976739  | 0.000028  | -0.03777 | 0.0000218 | C10orf28(0)                 |
| rs62545861 | 9  | 36797931  | 0.0000281 | 0.1413   | 0.0000306 | .                           |
| rs10181497 | 2  | 226049187 | 0.0000282 | 0.03909  | 0.0000353 | .                           |
| rs10199596 | 2  | 226044243 | 0.0000282 | 0.03909  | 0.0000353 | .                           |
| rs10439360 | 2  | 226055152 | 0.0000282 | 0.03909  | 0.0000353 | .                           |
| rs12613972 | 2  | 226052225 | 0.0000282 | 0.03909  | 0.0000353 | .                           |
| rs12694653 | 2  | 226049058 | 0.0000282 | 0.03909  | 0.0000353 | .                           |
| rs13387454 | 2  | 226040367 | 0.0000282 | 0.03909  | 0.0000353 | .                           |
| rs13387555 | 2  | 226040421 | 0.0000282 | 0.03909  | 0.0000353 | .                           |



|            |    |           |           |          |           |                                   |
|------------|----|-----------|-----------|----------|-----------|-----------------------------------|
| rs13404966 | 2  | 226046972 | 0.0000282 | 0.03909  | 0.0000353 | .                                 |
| rs13423059 | 2  | 226044727 | 0.0000282 | 0.03909  | 0.0000353 | .                                 |
| rs13423265 | 2  | 226044778 | 0.0000282 | 0.03909  | 0.0000353 | .                                 |
| rs13430908 | 2  | 226047149 | 0.0000282 | 0.03909  | 0.0000353 | .                                 |
| rs1345076  | 2  | 226039406 | 0.0000282 | 0.03909  | 0.0000353 | .                                 |
| rs1348429  | 2  | 226047545 | 0.0000282 | 0.03909  | 0.0000353 | .                                 |
| rs1348430  | 2  | 226047177 | 0.0000282 | 0.03909  | 0.0000353 | .                                 |
| rs1470327  | 2  | 226051998 | 0.0000282 | 0.03909  | 0.0000353 | .                                 |
| rs1562014  | 2  | 226041934 | 0.0000282 | 0.03909  | 0.0000353 | .                                 |
| rs2396217  | 2  | 226056245 | 0.0000282 | 0.03909  | 0.0000353 | .                                 |
| rs57201753 | 2  | 226052782 | 0.0000282 | 0.03909  | 0.0000353 | .                                 |
| rs7564175  | 2  | 226047816 | 0.0000282 | 0.03909  | 0.0000353 | .                                 |
| rs7570102  | 2  | 226051188 | 0.0000282 | 0.03909  | 0.0000353 | .                                 |
| rs13430799 | 2  | 226047057 | 0.0000292 | 0.0394   | 0.0000401 | .                                 |
| rs6463448  | 7  | 47839846  | 0.0000292 | 0.03642  | 0.0000304 | PKD1L1(0) FLJ21075(0)             |
| rs1963749  | 10 | 99904169  | 0.0000293 | -0.03812 | 0.0000222 | C10orf28(0)                       |
| rs62052138 | 16 | 74545959  | 0.0000293 | 0.0451   | 0.0000316 | GLG1(0)                           |
| rs2025625  | 10 | 100004996 | 0.0000297 | -0.03784 | 0.0000249 | LOXL4(-2.446kb) C10orf28(+0.342k) |
| rs4852194  | 2  | 81431695  | 0.0000297 | 0.03949  | 0.0000547 | .                                 |
| rs59178279 | 6  | 13927510  | 0.0000297 | 0.04434  | 0.0000267 | RNF182(0)                         |
| rs12773466 | 10 | 99976611  | 0.0000298 | -0.03756 | 0.0000243 | C10orf28(0)                       |
| rs12780143 | 10 | 99949813  | 0.0000298 | -0.03756 | 0.0000237 | C10orf28(0)                       |
| rs4919188  | 10 | 99974814  | 0.0000298 | -0.03756 | 0.0000237 | C10orf28(0)                       |
| rs7071520  | 10 | 99952534  | 0.0000298 | -0.03756 | 0.0000237 | C10orf28(0)                       |
| rs9419846  | 10 | 99971848  | 0.0000298 | -0.03756 | 0.0000237 | C10orf28(0)                       |
| rs9420728  | 10 | 99960233  | 0.0000298 | -0.03752 | 0.0000237 | C10orf28(0)                       |
| rs1838201  | 2  | 226033725 | 0.0000299 | 0.03901  | 0.0000371 | .                                 |
| rs7745956  | 6  | 13935066  | 0.0000305 | 0.04463  | 0.0000261 | RNF182(0)                         |
| rs1048757  | 10 | 100004441 | 0.0000306 | -0.0375  | 0.0000252 | LOXL4(-3.001kb) C10orf28(0)       |
| rs1359508  | 10 | 100003785 | 0.0000306 | -0.0375  | 0.0000252 | LOXL4(-3.657kb) C10orf28(0)       |
| rs1252920  | 10 | 99947771  | 0.0000307 | -0.03747 | 0.0000246 | C10orf28(0)                       |
| rs12781480 | 10 | 99983310  | 0.0000308 | -0.03748 | 0.000025  | C10orf28(0)                       |
| rs11851068 | 14 | 24120355  | 0.0000311 | 0.04789  | 0.0000278 | DHRS2(+5.507kb)                   |
| rs2753403  | 14 | 68913185  | 0.0000312 | -0.0375  | 0.0000225 | RAD51L1(0)                        |
| rs4902582  | 14 | 68893008  | 0.0000312 | -0.04609 | 0.0000218 | RAD51L1(0)                        |
| rs4919183  | 10 | 99953308  | 0.0000312 | -0.04599 | 0.0000247 | C10orf28(0)                       |
| rs751264   | 2  | 226037824 | 0.0000312 | 0.03909  | 0.0000383 | .                                 |
| rs2165925  | 2  | 226036682 | 0.0000313 | 0.03676  | 0.0000392 | .                                 |
| rs561437   | 13 | 110936227 | 0.0000313 | 0.039    | 0.0000386 | COL4A1(0)                         |
| rs779492   | 6  | 69888173  | 0.0000313 | 0.06484  | 0.0000312 | BAI3(0)                           |
| rs12581778 | 12 | 106271573 | 0.0000314 | -0.03744 | 0.000021  | .                                 |
| rs34217499 | 2  | 226057371 | 0.000032  | 0.03892  | 0.0000397 | .                                 |
| rs2263704  | 20 | 22973047  | 0.0000322 | 0.04884  | 0.0000342 | .                                 |
| rs6113879  | 20 | 22971098  | 0.0000327 | 0.04931  | 0.0000343 | .                                 |
| rs10798850 | 1  | 31892148  | 0.0000329 | -0.03725 | 0.0000459 | SERINC2(0)                        |
| rs4949400  | 1  | 31898132  | 0.0000329 | -0.03722 | 0.000046  | SERINC2(0)                        |
| rs12175093 | 6  | 29936408  | 0.000033  | -0.04212 | 0.0000269 | HLA-A29.1(0) HCG9(-6.483kb)       |

|            |    |           |           |          |           |                                   |
|------------|----|-----------|-----------|----------|-----------|-----------------------------------|
| rs62062534 | 17 | 8547880   | 0.0000331 | 0.04154  | 0.0000276 | MYH10(+13.84kb)                   |
| rs10786399 | 10 | 99926655  | 0.0000335 | -0.03736 | 0.0000266 | C10orf28(0)                       |
| rs4317916  | 10 | 99925666  | 0.0000335 | -0.03736 | 0.0000266 | C10orf28(0)                       |
| rs7086585  | 10 | 99925879  | 0.0000335 | -0.03736 | 0.0000266 | C10orf28(0)                       |
| rs7340338  | 2  | 226049755 | 0.0000335 | -0.03736 | 0.0000416 | .                                 |
| rs7911317  | 10 | 99917316  | 0.0000335 | -0.03736 | 0.0000266 | C10orf28(0)                       |
| rs9419844  | 10 | 99929900  | 0.0000335 | -0.03736 | 0.0000266 | C10orf28(0)                       |
| rs9420720  | 10 | 99928198  | 0.0000335 | 0.03883  | 0.0000266 | C10orf28(0)                       |
| rs12897307 | 14 | 68895325  | 0.0000337 | -0.04586 | 0.0000238 | RAD51L1(0)                        |
| rs10203177 | 2  | 226036325 | 0.0000338 | 0.03899  | 0.0000409 | .                                 |
| rs2167005  | 2  | 226006998 | 0.0000338 | 0.03886  | 0.0000465 | .                                 |
| rs10135781 | 14 | 24118244  | 0.0000339 | -0.03716 | 0.0000306 | DHRS2(+3.396kb)                   |
| rs4949403  | 1  | 31898279  | 0.0000339 | 0.04765  | 0.0000463 | SERINC2(0)                        |
| rs11211307 | 1  | 47044509  | 0.0000341 | 0.1573   | 0.0000338 | MKNK1(0)                          |
| rs11158273 | 14 | 24117528  | 0.0000347 | 0.04828  | 0.0000296 | DHRS2(+2.68kb)                    |
| rs10748714 | 10 | 99903921  | 0.000035  | -0.03724 | 0.000029  | C10orf28(0)                       |
| rs10786396 | 10 | 99905825  | 0.000035  | -0.03724 | 0.000029  | C10orf28(0)                       |
| rs7909145  | 10 | 99907914  | 0.000035  | -0.03724 | 0.000029  | C10orf28(0)                       |
| rs2838737  | 21 | 46335580  | 0.0000352 | 0.05177  | 0.0000432 | ITGB2(0)                          |
| rs2175785  | 20 | 11585551  | 0.0000354 | 0.03669  | 0.000039  | .                                 |
| rs7079392  | 10 | 128153623 | 0.0000354 | 0.05462  | 0.0000434 | C10orf90(0)                       |
| rs13035373 | 2  | 226059615 | 0.0000355 | 0.03936  | 0.0000425 | .                                 |
| rs4478858  | 1  | 31883925  | 0.0000357 | -0.03695 | 0.0000485 | SERINC2(-2.037kb)                 |
| rs12132936 | 1  | 31895931  | 0.0000365 | -0.03689 | 0.0000519 | SERINC2(0)                        |
| rs17095582 | 14 | 24121331  | 0.0000368 | 0.04756  | 0.0000322 | DHRS2(+6.483kb)                   |
| rs222619   | 14 | 24122098  | 0.0000368 | 0.04756  | 0.0000322 | DHRS2(+7.25kb)                    |
| rs4902587  | 14 | 68905688  | 0.0000369 | -0.04549 | 0.0000271 | RAD51L1(0)                        |
| rs11850996 | 14 | 24120127  | 0.0000371 | 0.04749  | 0.0000331 | DHRS2(+5.279kb)                   |
| rs1443667  | 2  | 226032555 | 0.0000374 | 0.03876  | 0.0000451 | .                                 |
| rs10836949 | 11 | 4943671   | 0.0000375 | -0.03685 | 0.0000386 | OR51G1(-0.932kb) OR51G2(+6.778kb) |
| rs10836950 | 11 | 4944286   | 0.0000375 | 0.07388  | 0.0000386 | OR51G1(-0.317kb) OR51G2(+7.393kb) |
| rs10914383 | 1  | 31894402  | 0.0000375 | 0.07388  | 0.0000528 | SERINC2(0)                        |
| rs4902589  | 14 | 68908716  | 0.0000376 | -0.0458  | 0.0000277 | RAD51L1(0)                        |
| rs12037108 | 1  | 31895394  | 0.0000381 | -0.03681 | 0.0000537 | SERINC2(0)                        |
| rs4949398  | 1  | 31892847  | 0.0000381 | -0.03681 | 0.0000537 | SERINC2(0)                        |
| rs4949399  | 1  | 31892911  | 0.0000381 | -0.03681 | 0.0000537 | SERINC2(0)                        |
| rs10208492 | 2  | 225991716 | 0.0000382 | 0.03788  | 0.0000501 | .                                 |
| rs10177658 | 2  | 226056701 | 0.0000387 | 0.03859  | 0.0000507 | .                                 |
| rs7519372  | 1  | 104766793 | 0.0000388 | -0.03599 | 0.0000376 | .                                 |
| rs10439359 | 2  | 226054815 | 0.000039  | 0.03844  | 0.0000493 | .                                 |
| rs9357092  | 6  | 29984252  | 0.000039  | -0.04109 | 0.0000326 | HLA-A29.1(+7.101kb)               |
| rs4455147  | 2  | 226000515 | 0.0000392 | 0.03797  | 0.0000581 | .                                 |
| rs7807877  | 7  | 25448939  | 0.0000397 | -0.04553 | 0.0000579 | .                                 |
| rs1317251  | 1  | 31897293  | 0.0000398 | -0.03674 | 0.000055  | SERINC2(0)                        |
| rs4949401  | 1  | 31898162  | 0.0000398 | -0.03674 | 0.000055  | SERINC2(0)                        |
| rs1517931  | 3  | 65018403  | 0.0000399 | 0.03901  | 0.0000367 | .                                 |
| rs3750599  | 10 | 100013244 | 0.000041  | -0.0371  | 0.0000338 | LOXL4(0) C10orf28(+8.59kb)        |

|            |    |           |           |          |           |                                  |
|------------|----|-----------|-----------|----------|-----------|----------------------------------|
| rs2331703  | 14 | 68906766  | 0.0000414 | -0.04518 | 0.0000311 | RAD51L1(0)                       |
| rs2331704  | 14 | 68906833  | 0.0000414 | -0.04518 | 0.0000311 | RAD51L1(0)                       |
| rs61751560 | 5  | 177569969 | 0.0000417 | 0.1128   | 0.0000416 | RMND5B(0) NOLA2(-6.496kb) N4BP3( |
| rs9573665  | 13 | 76407668  | 0.0000418 | 0.06337  | 0.0000469 | LMO7(0)                          |
| rs2765025  | 1  | 1296691   | 0.0000419 | -0.1392  | 0.0000397 | MXRA8(+2.776kb) DVL1(+12.2kb) AU |
| rs56058714 | 1  | 1296153   | 0.0000419 | -0.1392  | 0.0000397 | MXRA8(+2.238kb) DVL1(+11.66kb) A |
| rs11189521 | 10 | 99992206  | 0.0000421 | -0.03688 | 0.0000343 | LOXL4(-15.24kb) C10orf28(0)      |
| rs4949402  | 1  | 31898234  | 0.0000422 | -0.03676 | 0.000057  | SERINC2(0)                       |
| rs7894624  | 10 | 99917211  | 0.0000422 | -0.03691 | 0.0000337 | C10orf28(0)                      |
| rs3765712  | 1  | 3600799   | 0.0000424 | 0.07387  | 0.0000434 | TP73(0)                          |
| rs10786391 | 10 | 99895924  | 0.0000428 | -0.03736 | 0.0000362 | C10orf28(0)                      |
| rs61749659 | 5  | 177565255 | 0.0000433 | 0.1121   | 0.0000466 | RMND5B(0) NOLA2(-11.21kb) N4BP3( |
| rs11078760 | 17 | 8550466   | 0.0000434 | 0.04042  | 0.0000368 | MYH10(+16.43kb)                  |
| rs4902588  | 14 | 68908458  | 0.0000435 | -0.04521 | 0.0000326 | RAD51L1(0)                       |
| rs10748715 | 10 | 99914261  | 0.000045  | -0.03707 | 0.000034  | C10orf28(0)                      |
| rs4248141  | 6  | 29935843  | 0.0000458 | -0.04082 | 0.0000342 | HLA-A29.1(0) HCG9(-7.048kb)      |
| rs4919179  | 10 | 99927556  | 0.000047  | -0.03658 | 0.0000385 | C10orf28(0)                      |
| rs2275435  | 1  | 31898536  | 0.0000475 | -0.03644 | 0.0000657 | SERINC2(0)                       |
| rs16890532 | 4  | 14456828  | 0.0000477 | 0.06168  | 0.0000506 | .                                |
| rs737656   | 10 | 100012739 | 0.0000479 | -0.03652 | 0.0000402 | LOXL4(0) C10orf28(+8.085kb)      |
| rs9792925  | 1  | 104764375 | 0.000048  | -0.03616 | 0.0000381 | .                                |
| rs11896943 | 2  | 195818524 | 0.0000482 | -0.05982 | 0.0000364 | .                                |
| rs2525507  | 14 | 68938364  | 0.0000483 | -0.04602 | 0.0000329 | RAD51L1(0)                       |
| rs10509720 | 10 | 99967115  | 0.0000488 | -0.03744 | 0.0000388 | C10orf28(0)                      |
| rs6590292  | 11 | 127891554 | 0.0000489 | 0.03966  | 0.0000687 | .                                |
| rs321640   | 4  | 48002686  | 0.0000491 | -0.04776 | 0.0000448 | NPAL1(-16.1kb)                   |
| rs3134047  | 8  | 119822843 | 0.0000492 | -0.06351 | 0.0000939 | .                                |
| rs4949209  | 1  | 31897963  | 0.0000499 | -0.03637 | 0.0000676 | SERINC2(0)                       |
| rs5009448  | 6  | 29940488  | 0.0000507 | 0.04044  | 0.0000382 | HLA-A29.1(0) HCG9(-2.403kb)      |
| rs2263703  | 20 | 22972973  | 0.0000514 | 0.0475   | 0.0000549 | .                                |
| rs6036277  | 20 | 22972608  | 0.0000514 | 0.0475   | 0.0000549 | .                                |
| rs4233429  | 1  | 91099903  | 0.000052  | -0.0397  | 0.0000554 | .                                |
| rs13383739 | 2  | 226048279 | 0.0000522 | 0.03848  | 0.00006   | .                                |
| rs10786394 | 10 | 99903678  | 0.0000524 | -0.03635 | 0.0000451 | C10orf28(0)                      |
| rs10786395 | 10 | 99903704  | 0.0000524 | -0.03635 | 0.0000451 | C10orf28(0)                      |
| rs11189492 | 10 | 99903846  | 0.0000524 | -0.03635 | 0.0000451 | C10orf28(0)                      |
| rs10883047 | 10 | 99905588  | 0.0000526 | -0.03662 | 0.000042  | C10orf28(0)                      |
| rs9380150  | 6  | 30010492  | 0.0000526 | -0.04004 | 0.0000439 | ZNRD1(-18.54kb)                  |
| rs2152865  | 13 | 45351560  | 0.0000527 | -0.05329 | 0.0000351 | .                                |
| rs4248140  | 6  | 29935798  | 0.0000533 | -0.03825 | 0.0000423 | HLA-A29.1(0) HCG9(-7.093kb)      |
| rs2523968  | 6  | 29939148  | 0.0000543 | 0.03644  | 0.0000529 | HLA-A29.1(0) HCG9(-3.743kb)      |
| rs34421009 | 1  | 204315839 | 0.0000552 | -0.04037 | 0.0000388 | PLEKHA6(0)                       |
| rs13136335 | 4  | 14454726  | 0.0000558 | 0.03769  | 0.0000599 | .                                |
| rs9288601  | 2  | 226045748 | 0.0000558 | 0.061    | 0.0000697 | .                                |
| rs9916819  | 17 | 16552219  | 0.0000562 | 0.04597  | 0.0000682 | ZNF624(0)                        |
| rs4468282  | 10 | 99918976  | 0.0000571 | -0.03631 | 0.0000451 | C10orf28(0)                      |
| rs7532881  | 1  | 31880605  | 0.0000571 | -0.03641 | 0.0000768 | SERINC2(-5.357kb)                |

|            |    |           |           |          |           |                                  |
|------------|----|-----------|-----------|----------|-----------|----------------------------------|
| rs9393984  | 6  | 29932738  | 0.0000574 | -0.03987 | 0.0000478 | HLA-A29.1(0) HLA-A(+19.08kb) HCG |
| rs1934290  | 1  | 31884180  | 0.0000576 | -0.03596 | 0.0000773 | SERINC2(-1.782kb)                |
| rs10914375 | 1  | 31885859  | 0.0000578 | -0.03589 | 0.0000792 | SERINC2(-0.103kb)                |
| rs7226328  | 17 | 16547938  | 0.0000579 | 0.0457   | 0.0000712 | ZNF624(0)                        |
| rs17351936 | 4  | 14526801  | 0.0000588 | 0.05434  | 0.0000593 | .                                |
| rs4891001  | 18 | 73636680  | 0.000059  | 0.0475   | 0.0000494 | .                                |
| rs7222622  | 17 | 16505404  | 0.000059  | -0.05732 | 0.0000739 | ZNF624(-18.64kb)                 |
| rs2508035  | 6  | 29928487  | 0.0000607 | -0.04023 | 0.000053  | HLA-A29.1(0) HLA-A(+14.83kb) HCG |
| rs6036278  | 20 | 22976484  | 0.000061  | 0.04745  | 0.0000636 | .                                |
| rs9573667  | 13 | 76409823  | 0.0000611 | 0.0631   | 0.0000625 | LMO7(0)                          |
| rs4713275  | 6  | 29937580  | 0.0000619 | -0.03997 | 0.0000506 | HLA-A29.1(0) HCG9(-5.311kb)      |
| rs7545902  | 1  | 31884936  | 0.0000624 | -0.03552 | 0.0000863 | SERINC2(-1.026kb)                |
| rs10914376 | 1  | 31886564  | 0.0000626 | -0.03554 | 0.0000868 | SERINC2(0)                       |
| rs10914377 | 1  | 31886833  | 0.0000626 | -0.03554 | 0.0000868 | SERINC2(0)                       |
| rs61555389 | 14 | 24125374  | 0.0000631 | 0.04619  | 0.0000574 | DHRS2(+10.53kb)                  |
| rs520391   | 6  | 69551494  | 0.0000641 | 0.0686   | 0.0000426 | BAI3(0)                          |
| rs2612383  | 18 | 73639725  | 0.0000648 | -0.05719 | 0.0000545 | .                                |
| rs12729234 | 1  | 31887505  | 0.0000651 | -0.03573 | 0.0000908 | SERINC2(0)                       |
| rs6733762  | 2  | 156550745 | 0.0000651 | 0.03814  | 0.0000617 | .                                |
| rs58432165 | 2  | 168097701 | 0.000066  | 0.14     | 0.0000734 | XIRP2(0)                         |
| rs12096548 | 1  | 47054951  | 0.0000661 | 0.1517   | 0.000066  | MOBKL2C(-18.43kb) MKNK1(0)       |
| rs13407376 | 2  | 225999793 | 0.0000668 | 0.03655  | 0.0000961 | .                                |
| rs13429522 | 2  | 225999105 | 0.0000668 | 0.03653  | 0.0000948 | .                                |
| rs6107652  | 20 | 5534933   | 0.000067  | 0.03925  | 0.0001089 | RP5-1022P6.2(0)                  |
| rs9959233  | 18 | 73650328  | 0.0000672 | -0.06192 | 0.0000539 | .                                |
| rs10933080 | 2  | 225994216 | 0.0000674 | 0.03623  | 0.0000927 | .                                |
| rs12328799 | 2  | 225994136 | 0.0000674 | 0.03623  | 0.0000927 | .                                |
| rs13386557 | 2  | 225994295 | 0.0000674 | 0.03623  | 0.0000927 | .                                |
| rs11941715 | 4  | 189596123 | 0.0000681 | -0.04835 | 0.0001126 | .                                |
| rs1293154  | 6  | 70063740  | 0.0000685 | 0.04625  | 0.0000722 | BAI3(0)                          |
| rs4791678  | 17 | 16566673  | 0.0000685 | 0.06064  | 0.0000838 | ZNF624(+9.515kb)                 |
| rs16890488 | 4  | 14450655  | 0.0000686 | 0.06035  | 0.0000734 | .                                |
| rs35418813 | 2  | 226048170 | 0.0000695 | -0.03588 | 0.0000864 | .                                |
| rs7532872  | 1  | 31880584  | 0.0000695 | 0.03755  | 0.0000925 | SERINC2(-5.378kb)                |
| rs7607031  | 2  | 127110188 | 0.0000696 | 0.05038  | 0.0000959 | .                                |
| rs28832984 | 2  | 2960751   | 0.00007   | 0.05098  | 0.0000896 | .                                |
| rs12474357 | 2  | 148979105 | 0.0000701 | 0.1761   | 0.0000216 | .                                |
| rs4959037  | 6  | 29936307  | 0.0000703 | -0.03835 | 0.0000571 | HLA-A29.1(0) HCG9(-6.584kb)      |
| rs12621119 | 2  | 81436486  | 0.0000706 | 0.05685  | 0.0001323 | .                                |
| rs10165442 | 2  | 226038842 | 0.000071  | 0.03821  | 0.0000852 | .                                |
| rs755044   | 2  | 226038660 | 0.000071  | 0.03821  | 0.0000852 | .                                |
| rs16890483 | 4  | 14448076  | 0.0000714 | 0.06021  | 0.0000763 | .                                |
| rs2258210  | 20 | 22974672  | 0.0000716 | 0.04622  | 0.0000774 | .                                |
| rs380924   | 6  | 29939885  | 0.0000717 | 0.03589  | 0.0000722 | HLA-A29.1(0) HCG9(-3.006kb)      |
| rs13415546 | 2  | 225995545 | 0.0000719 | 0.03644  | 0.0000975 | .                                |
| rs4365068  | 11 | 127849320 | 0.0000724 | 0.04258  | 0.0000935 | .                                |
| rs332414   | 3  | 124247149 | 0.0000728 | -0.03757 | 0.0000755 | KALRN(0)                         |

|            |    |           |           |          |           |                             |
|------------|----|-----------|-----------|----------|-----------|-----------------------------|
| rs4391295  | 6  | 29935590  | 0.0000728 | -0.03823 | 0.0000599 | HLA-A29.1(0) HCG9(-7.301kb) |
| rs4538750  | 6  | 29935576  | 0.0000728 | -0.03823 | 0.0000599 | HLA-A29.1(0) HCG9(-7.315kb) |
| rs9295825  | 6  | 29941431  | 0.000073  | -0.03971 | 0.0000602 | HLA-A29.1(0) HCG9(-1.46kb)  |
| rs6584169  | 10 | 99895246  | 0.0000733 | -0.03556 | 0.0000649 | C10orf28(0)                 |
| rs6584170  | 10 | 99897782  | 0.0000733 | -0.03556 | 0.0000649 | C10orf28(0)                 |
| rs7905388  | 10 | 99898281  | 0.0000742 | -0.03577 | 0.0000623 | C10orf28(0)                 |
| rs6701521  | 1  | 31883295  | 0.0000748 | -0.03514 | 0.0001038 | SERINC2(-2.667kb)           |
| rs13117296 | 4  | 14454244  | 0.0000756 | 0.0594   | 0.000082  | .                           |
| rs13021357 | 2  | 240504931 | 0.0000758 | -0.0501  | 0.0001149 | .                           |
| rs13195278 | 6  | 70018250  | 0.0000759 | 0.06018  | 0.0000775 | BAI3(0)                     |
| rs16890582 | 4  | 14472200  | 0.0000763 | 0.05998  | 0.0000831 | .                           |
| rs62410138 | 4  | 14469847  | 0.0000763 | 0.05998  | 0.0000831 | .                           |
| rs4396615  | 18 | 73644351  | 0.0000766 | -0.05743 | 0.0000626 | .                           |
| rs9856553  | 3  | 172122511 | 0.0000771 | 0.1249   | 0.0000781 | FNDC3B(+4.024kb)            |
| rs6457127  | 6  | 29990938  | 0.0000782 | -0.0393  | 0.0000652 | HLA-A29.1(+13.79kb)         |
| rs10987211 | 9  | 128983973 | 0.0000785 | 0.1037   | 0.0000778 | .                           |
| rs34426119 | 4  | 90748410  | 0.0000785 | 0.03794  | 0.0000817 | SNCA(0)                     |
| rs7712065  | 5  | 94129189  | 0.0000787 | -0.05514 | 0.0000562 | MCTP1(0)                    |
| rs2258203  | 20 | 22974884  | 0.0000792 | 0.04596  | 0.0000853 | .                           |
| rs4947244  | 6  | 29954364  | 0.00008   | -0.03945 | 0.0000649 | HLA-A29.1(0) HCG9(+8.187kb) |
| rs11752303 | 6  | 29937541  | 0.0000805 | 0.04066  | 0.0000658 | HLA-A29.1(0) HCG9(-5.35kb)  |
| rs13141687 | 4  | 14563231  | 0.0000805 | -0.03927 | 0.000068  | .                           |
| rs28825109 | 2  | 2960365   | 0.0000812 | 0.05048  | 0.0001039 | .                           |
| rs6503133  | 17 | 8515636   | 0.0000817 | -0.0767  | 0.0000638 | MYH10(0)                    |
| rs12964945 | 18 | 73647551  | 0.0000821 | -0.05719 | 0.000069  | .                           |
| rs2612381  | 18 | 73643845  | 0.0000821 | -0.05719 | 0.000069  | .                           |
| rs11591416 | 10 | 100023208 | 0.0000822 | -0.03617 | 0.0000646 | LOXL4(0) C10orf28(+18.55kb) |
| rs2735079  | 6  | 29938932  | 0.0000822 | 0.03561  | 0.0000814 | HLA-A29.1(0) HCG9(-3.959kb) |
| rs779470   | 6  | 69930064  | 0.0000826 | 0.05892  | 0.0000868 | BAI3(0)                     |
| rs12193110 | 6  | 29937104  | 0.0000828 | -0.03798 | 0.0000685 | HLA-A29.1(0) HCG9(-5.787kb) |
| rs9890123  | 17 | 16508098  | 0.0000829 | 0.04655  | 0.0001009 | ZNF624(-15.95kb)            |
| rs6457110  | 6  | 29933881  | 0.0000833 | -0.03602 | 0.0000655 | HLA-A29.1(0) HCG9(-9.01kb)  |
| rs11150919 | 18 | 73640811  | 0.0000842 | -0.05623 | 0.0000701 | .                           |
| rs35144691 | 9  | 92126375  | 0.0000843 | -0.04053 | 0.0000879 | .                           |
| rs10881536 | 1  | 104763247 | 0.0000845 | -0.03426 | 0.0000795 | .                           |
| rs56688336 | 9  | 119525765 | 0.0000845 | 0.1156   | 0.000116  | ASTN2(0)                    |
| rs9404952  | 6  | 29804165  | 0.0000851 | -0.03555 | 0.0000533 | HLA-G(+5.266kb)             |
| rs6583224  | 3  | 197259810 | 0.0000859 | -0.03929 | 0.0000937 | BDH1(0)                     |
| rs11189528 | 10 | 100023957 | 0.0000866 | -0.03611 | 0.0000674 | LOXL4(0) C10orf28(+19.3kb)  |
| rs3766235  | 1  | 47049747  | 0.0000875 | 0.1364   | 0.0000899 | MKNK1(0)                    |
| rs3750598  | 10 | 100011970 | 0.0000876 | -0.03603 | 0.0000681 | LOXL4(0) C10orf28(+7.316kb) |
| rs1512234  | 6  | 69912547  | 0.0000878 | 0.05881  | 0.0000917 | BAI3(0)                     |
| rs4713274  | 6  | 29937493  | 0.0000883 | -0.03943 | 0.0000698 | HLA-A29.1(0) HCG9(-5.398kb) |
| rs7987641  | 13 | 45347334  | 0.0000884 | -0.05139 | 0.0000598 | .                           |
| rs2424497  | 20 | 22984077  | 0.000089  | 0.04583  | 0.000096  | .                           |
| rs9366750  | 6  | 29941829  | 0.0000891 | -0.03919 | 0.0000751 | HLA-A29.1(0) HCG9(-1.062kb) |
| rs10429063 | 7  | 70537478  | 0.0000895 | 0.058    | 0.0000848 | .                           |

|            |    |           |           |          |           |                                  |
|------------|----|-----------|-----------|----------|-----------|----------------------------------|
| rs34896744 | 1  | 1297635   | 0.0000903 | -0.1342  | 0.0000867 | MXRA8(+3.72kb) DVL1(+13.14kb) AU |
| rs779474   | 6  | 69923919  | 0.0000904 | 0.05869  | 0.0000947 | BAI3(0)                          |
| rs17780305 | 18 | 57158200  | 0.0000906 | -0.03549 | 0.0000788 | CCBE1(0)                         |
| rs7905384  | 10 | 99898268  | 0.0000906 | -0.08643 | 0.0000745 | C10orf28(0)                      |
| rs6048490  | 20 | 22976429  | 0.0000909 | 0.04589  | 0.0000966 | .                                |
| rs1392907  | 4  | 14563534  | 0.0000911 | 0.0404   | 0.000077  | .                                |
| rs4815169  | 20 | 22981729  | 0.0000913 | 0.04566  | 0.0000976 | .                                |
| rs6048493  | 20 | 22980627  | 0.0000913 | 0.04566  | 0.0000976 | .                                |
| rs6048494  | 20 | 22982660  | 0.0000913 | 0.04566  | 0.0000976 | .                                |
| rs6048496  | 20 | 22983829  | 0.0000913 | 0.04566  | 0.0000976 | .                                |
| rs779487   | 6  | 69896122  | 0.0000913 | 0.05875  | 0.0000952 | BAI3(0)                          |
| rs4711206  | 6  | 29987184  | 0.0000916 | -0.03899 | 0.0000779 | HLA-A29.1(+10.03kb)              |
| rs737657   | 10 | 100012890 | 0.0000917 | -0.03522 | 0.0000749 | LOXL4(0) C10orf28(+8.236kb)      |
| rs12797923 | 11 | 127813659 | 0.0000918 | 0.03582  | 0.0000834 | .                                |
| rs12458382 | 18 | 57157187  | 0.0000921 | -0.08628 | 0.0000833 | CCBE1(0)                         |
| rs58740854 | 3  | 122700994 | 0.0000924 | -0.1095  | 0.0000834 | SEMA5B(0)                        |
| rs6687363  | 1  | 181635045 | 0.0000927 | -0.04673 | 0.0000798 | CACNA1E(0)                       |
| rs7217717  | 17 | 16504697  | 0.0000929 | 0.04619  | 0.0001128 | ZNF624(-19.35kb)                 |
| rs13034368 | 2  | 240503779 | 0.0000932 | -0.04981 | 0.0001393 | .                                |
| rs10931008 | 2  | 183238919 | 0.0000935 | 0.03747  | 0.0001363 | PDE1A(0)                         |
| rs16890392 | 4  | 14397135  | 0.0000937 | 0.05929  | 0.0000892 | .                                |
| rs9910087  | 17 | 16528866  | 0.0000938 | 0.04619  | 0.0001137 | ZNF624(0)                        |
| rs701656   | 6  | 69949248  | 0.0000941 | 0.05969  | 0.0001033 | BAI3(0)                          |
| rs62152457 | 2  | 81425140  | 0.0000944 | 0.05485  | 0.0001735 | .                                |
| rs878178   | 10 | 100013977 | 0.0000947 | -0.03538 | 0.0000793 | LOXL4(0) C10orf28(+9.323kb)      |
| rs13077136 | 3  | 197260879 | 0.0000948 | -0.03993 | 0.0000992 | BDH1(0)                          |
| rs1449512  | 2  | 225996355 | 0.000095  | 0.03572  | 0.0001244 | .                                |
| rs1459262  | 2  | 72099440  | 0.000095  | 0.03725  | 0.000114  | .                                |
| rs35278949 | 9  | 99120515  | 0.0000954 | -0.03841 | 0.0000473 | SLC35D2(0)                       |
| rs35369041 | 9  | 99120922  | 0.0000954 | 0.1128   | 0.0000473 | SLC35D2(0)                       |
| rs6927487  | 6  | 29936404  | 0.0000954 | 0.1128   | 0.0000772 | HLA-A29.1(0) HCG9(-6.487kb)      |
| rs1518283  | 2  | 156526525 | 0.0000956 | 0.03729  | 0.0001    | .                                |
| rs9399049  | 6  | 133263983 | 0.0000959 | 0.05611  | 0.0001171 | .                                |
| rs62072845 | 17 | 16516573  | 0.000096  | 0.04645  | 0.000124  | ZNF624(-7.474kb)                 |
| rs506622   | 5  | 152846195 | 0.0000963 | 0.0987   | 0.0000923 | .                                |
| rs1039630  | 1  | 31881472  | 0.0000965 | -0.03489 | 0.0001286 | SERINC2(-4.49kb)                 |
| rs2839939  | 1  | 31881637  | 0.0000965 | -0.03489 | 0.0001286 | SERINC2(-4.325kb)                |
| rs1751859  | 13 | 40958338  | 0.0000977 | 0.1624   | 0.0000981 | .                                |
| rs13168960 | 5  | 7109836   | 0.0000992 | -0.03918 | 0.0000848 | .                                |
| rs62459587 | 7  | 70576981  | 0.0001002 | 0.145    | 0.0000971 | .                                |
| rs6756754  | 2  | 127044289 | 0.0001005 | 0.0482   | 0.0001306 | .                                |
| rs12799956 | 11 | 127840676 | 0.0001018 | 0.03534  | 0.0000939 | .                                |
| rs9934345  | 16 | 54194631  | 0.0001024 | 0.0766   | 0.0001026 | .                                |
| rs10513458 | 9  | 128972100 | 0.0001027 | 0.03774  | 0.0000982 | .                                |
| rs2406722  | 4  | 138180160 | 0.0001031 | -0.09712 | 0.0000866 | .                                |
| rs13005410 | 2  | 156548990 | 0.0001032 | 0.03711  | 0.0000957 | .                                |
| rs7152152  | 14 | 68906285  | 0.0001034 | -0.03958 | 0.000159  | RAD51L1(0)                       |

|            |    |           |           |          |           |                                  |
|------------|----|-----------|-----------|----------|-----------|----------------------------------|
| rs11040898 | 11 | 6505271   | 0.0001044 | -0.03653 | 0.0000986 | TRIM3(+10.07kb) FXC1(0) C11orf47 |
| rs6584168  | 10 | 99893753  | 0.0001047 | -0.03473 | 0.0000853 | C10orf28(-0.627kb)               |
| rs7088359  | 10 | 99891010  | 0.0001047 | -0.03482 | 0.0000857 | C10orf28(-3.37kb)                |
| rs7321487  | 13 | 45358537  | 0.0001047 | -0.05149 | 0.0000702 | .                                |
| rs59244939 | 7  | 25449645  | 0.0001048 | -0.04195 | 0.000145  | .                                |
| rs12608168 | 18 | 57138071  | 0.0001052 | -0.08429 | 0.0000949 | CCBE1(0)                         |
| rs1334461  | 10 | 99868267  | 0.0001054 | -0.03466 | 0.0000858 | .                                |
| rs16987211 | 2  | 20095847  | 0.0001054 | 0.07445  | 0.0000645 | WDR35(-14.18kb) TTC32(-0.666kb)  |
| rs10786389 | 10 | 99880643  | 0.000106  | -0.03472 | 0.0000869 | C10orf28(-13.74kb)               |
| rs9454722  | 6  | 69982854  | 0.0001062 | 0.05888  | 0.0001145 | BAI3(0)                          |
| rs16959870 | 17 | 16524047  | 0.0001064 | 0.04501  | 0.0001264 | ZNF624(0)                        |
| rs59345481 | 4  | 90860123  | 0.0001064 | 0.066    | 0.0001035 | MMRN1(0)                         |
| rs9567476  | 13 | 45352679  | 0.0001065 | -0.05154 | 0.0000707 | .                                |
| rs3910312  | 6  | 30008746  | 0.0001068 | -0.0385  | 0.00009   | .                                |
| rs28751872 | 17 | 16552681  | 0.000107  | 0.04545  | 0.0001222 | ZNF624(0)                        |
| rs996621   | 10 | 99857588  | 0.0001073 | 0.03421  | 0.0000971 | .                                |
| rs1334459  | 10 | 99870909  | 0.0001074 | -0.03388 | 0.0000934 | .                                |
| rs1611377  | 6  | 29680152  | 0.0001075 | 0.03748  | 0.00009   | HLA-F(-10.96kb)                  |
| rs16890480 | 4  | 14447638  | 0.0001078 | -0.03911 | 0.0001131 | .                                |
| rs6583226  | 3  | 197264343 | 0.0001078 | 0.05871  | 0.0001114 | BDH1(0)                          |
| rs57305125 | 17 | 16502653  | 0.0001086 | 0.04617  | 0.0001302 | .                                |
| rs11211318 | 1  | 47057844  | 0.0001091 | 0.1361   | 0.00011   | MOBKL2C(-15.54kb) MKNK1(0)       |
| rs1410699  | 6  | 70067347  | 0.0001091 | 0.05897  | 0.0001171 | BAI3(0)                          |
| rs1425865  | 11 | 127874845 | 0.0001093 | 0.04161  | 0.0001386 | .                                |
| rs4274203  | 11 | 127841507 | 0.0001094 | 0.03521  | 0.0000995 | .                                |
| rs6590290  | 11 | 127838575 | 0.0001094 | 0.03521  | 0.0000995 | .                                |
| rs7942702  | 11 | 127839534 | 0.0001094 | 0.03521  | 0.0000995 | .                                |
| rs12291931 | 11 | 127840143 | 0.0001098 | 0.03538  | 0.0001009 | .                                |
| rs62457652 | 7  | 70536069  | 0.0001099 | 0.05697  | 0.0001079 | .                                |
| rs1449513  | 2  | 225997565 | 0.0001105 | 0.03535  | 0.0001544 | .                                |
| rs2649613  | 1  | 1297723   | 0.0001106 | -0.1337  | 0.0001076 | MXRA8(+3.808kb) DVL1(+13.23kb) A |
| rs16958736 | 16 | 69353587  | 0.000111  | 0.0573   | 0.0000703 | VPS4A(0) SNTB2(+10.63kb) PDF(-8. |
| rs4961259  | 8  | 142265227 | 0.0001111 | 0.03726  | 0.0001014 | .                                |
| rs3775467  | 4  | 90832608  | 0.0001114 | 0.07086  | 0.0001138 | MMRN1(0)                         |
| rs7116628  | 11 | 127815468 | 0.0001115 | 0.03528  | 0.0001009 | .                                |
| rs1514632  | 8  | 132705354 | 0.0001116 | -0.04898 | 0.0001288 | .                                |
| rs12429913 | 13 | 76420102  | 0.0001117 | 0.07811  | 0.0001135 | LMO7(0)                          |
| rs1375902  | 12 | 98311450  | 0.0001122 | -0.03529 | 0.000075  | .                                |
| rs7776769  | 7  | 25449533  | 0.0001124 | -0.04174 | 0.0001568 | .                                |
| rs9323511  | 14 | 68909388  | 0.0001125 | -0.04328 | 0.0000851 | RAD51L1(0)                       |
| rs11211313 | 1  | 47049569  | 0.0001127 | 0.1358   | 0.0001137 | MKNK1(0)                         |
| rs11211314 | 1  | 47049610  | 0.0001127 | 0.1358   | 0.0001137 | MKNK1(0)                         |
| rs11211315 | 1  | 47049626  | 0.0001127 | 0.1358   | 0.0001137 | MKNK1(0)                         |
| rs11211316 | 1  | 47050688  | 0.0001127 | 0.1358   | 0.0001137 | MKNK1(0)                         |
| rs12080601 | 1  | 47051874  | 0.0001127 | 0.1358   | 0.0001137 | MKNK1(0)                         |
| rs12092171 | 1  | 47051948  | 0.0001127 | 0.1358   | 0.0001137 | MKNK1(0)                         |
| rs56089465 | 1  | 47049276  | 0.0001127 | 0.1358   | 0.0001137 | MKNK1(0)                         |

|            |    |           |           |          |           |                                   |
|------------|----|-----------|-----------|----------|-----------|-----------------------------------|
| rs61783120 | 1  | 47050220  | 0.0001127 | 0.1358   | 0.0001137 | MKNK1(0)                          |
| rs61783122 | 1  | 47052535  | 0.0001127 | 0.1358   | 0.0001137 | MKNK1(0)                          |
| rs28826699 | 17 | 16506911  | 0.000113  | 0.04517  | 0.0001336 | ZNF624(-17.14kb)                  |
| rs7807864  | 7  | 25448902  | 0.0001132 | -0.0429  | 0.0001495 | .                                 |
| rs7103370  | 11 | 127879208 | 0.0001133 | 0.03509  | 0.0001027 | .                                 |
| rs9405044  | 6  | 30006765  | 0.0001147 | -0.03832 | 0.0000957 | .                                 |
| rs779483   | 6  | 69902557  | 0.0001149 | 0.05806  | 0.0001195 | BAI3(0)                           |
| rs7911699  | 10 | 99890470  | 0.000115  | -0.0345  | 0.0000946 | C10orf28(-3.91kb)                 |
| rs512971   | 5  | 152850264 | 0.0001151 | 0.1022   | 0.0001093 | GRIA1(-19.82kb)                   |
| rs11221131 | 11 | 127887358 | 0.0001152 | 0.03536  | 0.0001037 | .                                 |
| rs4719064  | 7  | 70546404  | 0.0001164 | 0.05717  | 0.0001122 | .                                 |
| rs9393987  | 6  | 30009169  | 0.0001175 | -0.03827 | 0.0000979 | ZNRD1(-19.87kb)                   |
| rs10883054 | 10 | 100023614 | 0.0001179 | -0.03556 | 0.0000879 | LOXL4(0) C10orf28(+18.96kb)       |
| rs62457655 | 7  | 70543055  | 0.0001181 | 0.05944  | 0.0001204 | .                                 |
| rs62457656 | 7  | 70544189  | 0.0001181 | 0.05665  | 0.0001204 | .                                 |
| rs779462   | 6  | 69944656  | 0.0001181 | 0.05665  | 0.0001284 | BAI3(0)                           |
| rs1944297  | 18 | 57168446  | 0.0001186 | -0.08523 | 0.0001072 | CCBE1(0)                          |
| rs2013053  | 11 | 127824351 | 0.0001188 | 0.03516  | 0.0001066 | .                                 |
| rs321639   | 4  | 48002549  | 0.0001188 | -0.04449 | 0.0001076 | NPAL1(-16.24kb)                   |
| rs2424495  | 20 | 22979216  | 0.0001192 | 0.04475  | 0.0001284 | .                                 |
| rs2746618  | 20 | 22979073  | 0.0001192 | 0.04475  | 0.0001284 | .                                 |
| rs2015798  | 11 | 127863383 | 0.0001193 | 0.03572  | 0.0001066 | .                                 |
| rs7598032  | 2  | 11353200  | 0.0001197 | -0.03454 | 0.0000902 | ROCK2(0)                          |
| rs7222875  | 17 | 16556508  | 0.0001199 | 0.04445  | 0.0001433 | ZNF624(0)                         |
| rs7072474  | 10 | 99893053  | 0.0001204 | -0.03447 | 0.000098  | C10orf28(-1.327kb)                |
| rs11189526 | 10 | 100020572 | 0.0001207 | -0.03481 | 0.0000993 | LOXL4(0) C10orf28(+15.92kb)       |
| rs9348835  | 6  | 29985630  | 0.0001208 | -0.03824 | 0.0001018 | HLA-A29.1(+8.479kb)               |
| rs62072850 | 17 | 16518370  | 0.0001209 | 0.04576  | 0.0001376 | ZNF624(-5.677kb)                  |
| rs7578151  | 2  | 156568806 | 0.0001209 | 0.03701  | 0.0001159 | .                                 |
| rs34978599 | 4  | 14417302  | 0.0001214 | 0.05951  | 0.0001264 | .                                 |
| rs4719065  | 7  | 70557824  | 0.0001214 | 0.05636  | 0.0001256 | .                                 |
| rs62459583 | 7  | 70553606  | 0.0001214 | 0.05636  | 0.0001256 | .                                 |
| rs11034672 | 11 | 4944500   | 0.0001216 | 0.07285  | 0.0001208 | OR51G1(-0.103kb) OR51G2(+7.607kb) |
| rs12776636 | 10 | 100024848 | 0.000122  | -0.03544 | 0.0000952 | LOXL4(0)                          |
| rs7930883  | 11 | 127839792 | 0.000122  | 0.04097  | 0.0001602 | .                                 |
| rs7308578  | 12 | 98309252  | 0.0001232 | -0.03527 | 0.0000821 | .                                 |
| rs7766469  | 6  | 30015594  | 0.0001232 | -0.03824 | 0.0001035 | ZNRD1(-13.44kb) PPP1R11(-19.34kb) |
| rs2184356  | 10 | 99878480  | 0.0001233 | -0.03435 | 0.0001023 | C10orf28(-15.9kb)                 |
| rs9346271  | 6  | 70079320  | 0.0001233 | 0.05863  | 0.0001314 | BAI3(0)                           |
| rs7221518  | 17 | 16556473  | 0.0001235 | 0.04435  | 0.0001482 | ZNF624(0)                         |
| rs9908015  | 17 | 16561779  | 0.0001235 | 0.04435  | 0.0001482 | ZNF624(+4.621kb)                  |
| rs7903850  | 10 | 99912061  | 0.0001242 | -0.03525 | 0.0001167 | C10orf28(0)                       |
| rs4902578  | 14 | 68875129  | 0.0001243 | -0.04282 | 0.0000929 | RAD51L1(0)                        |
| rs10488983 | 4  | 14417504  | 0.0001245 | 0.05854  | 0.0001273 | .                                 |
| rs57531196 | 4  | 23884973  | 0.0001249 | 0.07797  | 0.0001259 | PPARGC1A(0)                       |
| rs12532559 | 7  | 70549484  | 0.0001251 | 0.05643  | 0.0001301 | .                                 |
| rs9393989  | 6  | 30040084  | 0.0001252 | -0.03813 | 0.0001065 | ZNRD1(+7.398kb) RNF39(0) PPP1R11  |



|            |    |           |           |          |           |                                  |
|------------|----|-----------|-----------|----------|-----------|----------------------------------|
| rs435766   | 6  | 29939852  | 0.0001253 | 0.03503  | 0.00012   | HLA-A29.1(0) HCG9(-3.039kb)      |
| rs1283464  | 6  | 70027419  | 0.0001257 | -0.0381  | 0.0001302 | BAI3(0)                          |
| rs4711209  | 6  | 30047403  | 0.0001257 | 0.05843  | 0.0001094 | ZNRD1(+14.72kb) RNF39(+3.775kb)  |
| rs1334465  | 10 | 99876121  | 0.0001265 | -0.03465 | 0.0001024 | C10orf28(-18.26kb)               |
| rs2517670  | 6  | 29938674  | 0.0001266 | 0.03556  | 0.00012   | HLA-A29.1(0) HCG9(-4.217kb)      |
| rs6048491  | 20 | 22978192  | 0.0001267 | 0.04465  | 0.0001355 | .                                |
| rs7228043  | 18 | 57152806  | 0.0001273 | -0.08546 | 0.0001174 | CCBE1(0)                         |
| rs7229774  | 18 | 57152811  | 0.0001273 | -0.08546 | 0.0001174 | CCBE1(0)                         |
| rs6584167  | 10 | 99889852  | 0.0001276 | -0.03427 | 0.000106  | C10orf28(-4.528kb)               |
| rs7090206  | 10 | 99892742  | 0.0001276 | -0.03427 | 0.000106  | C10orf28(-1.638kb)               |
| rs7597769  | 2  | 72099121  | 0.0001277 | 0.03695  | 0.0001525 | .                                |
| rs62054735 | 17 | 13848542  | 0.0001283 | -0.03882 | 0.0001566 | .                                |
| rs62459581 | 7  | 70551717  | 0.0001295 | 0.05611  | 0.0001348 | .                                |
| rs6968107  | 7  | 70558922  | 0.0001296 | 0.05611  | 0.0001349 | .                                |
| rs1956538  | 14 | 68859895  | 0.0001301 | -0.04385 | 0.0000928 | RAD51L1(0)                       |
| rs4766782  | 12 | 116842669 | 0.0001302 | -0.03483 | 0.0001276 | .                                |
| rs735116   | 10 | 100021533 | 0.0001302 | -0.03421 | 0.0001027 | LOXL4(0) C10orf28(+16.88kb)      |
| rs58340747 | 16 | 53739587  | 0.0001304 | -0.0719  | 0.000095  | RPGRIP1L(+1.816kb) FTO(0)        |
| rs62457654 | 7  | 70540790  | 0.000131  | 0.05636  | 0.0001305 | .                                |
| rs10082630 | 11 | 127869810 | 0.0001312 | 0.03478  | 0.0001186 | .                                |
| rs28612609 | 17 | 16580845  | 0.0001317 | 0.04426  | 0.0001583 | CCDC144A(-12.79kb)               |
| rs595715   | 6  | 69530493  | 0.000132  | 0.07072  | 0.0000774 | BAI3(0)                          |
| rs10943371 | 6  | 77295335  | 0.0001322 | 0.05032  | 0.0001559 | .                                |
| rs3815826  | 16 | 74508702  | 0.0001331 | -0.03413 | 0.0001379 | GLG1(0)                          |
| rs4098026  | 10 | 99884547  | 0.0001331 | 0.04013  | 0.0001144 | C10orf28(-9.833kb)               |
| rs28792801 | 17 | 16506652  | 0.0001334 | 0.04469  | 0.0001615 | ZNF624(-17.39kb)                 |
| rs228733   | 1  | 7841825   | 0.0001337 | -0.05518 | 0.0001381 | VAMP3(+0.333kb) PER3(-2.937kb) C |
| rs34234297 | 4  | 14561797  | 0.0001341 | 0.04566  | 0.0001391 | .                                |
| rs58920056 | 4  | 23883275  | 0.0001349 | 0.07733  | 0.0001368 | PPARGC1A(0)                      |
| rs7980374  | 12 | 98302572  | 0.0001351 | -0.035   | 0.0000886 | .                                |
| rs59477937 | 17 | 71024524  | 0.0001353 | -0.07974 | 0.0002001 | SLC39A11(0)                      |
| rs61264876 | 17 | 71024173  | 0.0001353 | -0.07974 | 0.0002001 | SLC39A11(0)                      |
| rs7751967  | 6  | 70082003  | 0.0001354 | 0.05836  | 0.0001441 | BAI3(0)                          |
| rs2091276  | 7  | 70542684  | 0.000136  | -0.04028 | 0.0001385 | .                                |
| rs544770   | 6  | 69535577  | 0.000136  | 0.06592  | 0.0000863 | BAI3(0)                          |
| rs6533698  | 4  | 114459885 | 0.000136  | 0.05596  | 0.0001471 | CAMK2D(0)                        |
| rs1928060  | 6  | 70090758  | 0.0001365 | 0.03355  | 0.0001461 | BAI3(0)                          |
| rs4373625  | 9  | 128974575 | 0.0001365 | 0.04426  | 0.0001358 | .                                |
| rs62072790 | 17 | 16513588  | 0.0001365 | 0.05838  | 0.0001606 | ZNF624(-10.46kb)                 |
| rs7194558  | 16 | 70716742  | 0.0001365 | 0.03653  | 0.0001409 | VAC14(-4.599kb) ABBA-1(0)        |
| rs4791676  | 17 | 16562303  | 0.0001366 | 0.04413  | 0.000164  | ZNF624(+5.145kb)                 |
| rs6817923  | 4  | 136238531 | 0.0001366 | -0.03473 | 0.0001014 | .                                |
| rs7219632  | 17 | 16508393  | 0.0001367 | 0.04409  | 0.0001633 | ZNF624(-15.65kb)                 |
| rs9891138  | 17 | 16508022  | 0.0001367 | 0.04409  | 0.0001633 | ZNF624(-16.02kb)                 |
| rs11592020 | 10 | 100024195 | 0.0001368 | -0.03521 | 0.0001064 | LOXL4(0) C10orf28(+19.54kb)      |
| rs10444526 | 12 | 98311137  | 0.000137  | -0.03481 | 0.0000924 | .                                |
| rs2305682  | 4  | 23882718  | 0.0001371 | 0.128    | 0.0001384 | PPARGC1A(0)                      |

|            |    |           |           |          |           |                                  |
|------------|----|-----------|-----------|----------|-----------|----------------------------------|
| rs60543052 | 2  | 168029316 | 0.0001371 | 0.07728  | 0.0001421 | XIRP2(0)                         |
| rs11126471 | 2  | 75714764  | 0.0001377 | 0.03588  | 0.0001432 | FAM176A(-4.679kb)                |
| rs11124209 | 2  | 240505976 | 0.0001379 | -0.04841 | 0.0002033 | .                                |
| rs12707927 | 8  | 129205024 | 0.000138  | -0.06985 | 0.0001218 | .                                |
| rs11717963 | 3  | 65020969  | 0.0001382 | 0.03606  | 0.0001367 | .                                |
| rs28431824 | 17 | 16553528  | 0.0001383 | 0.04407  | 0.0001648 | ZNF624(0)                        |
| rs28626982 | 17 | 16552913  | 0.0001383 | 0.04407  | 0.0001648 | ZNF624(0)                        |
| rs28674185 | 17 | 16553418  | 0.0001383 | 0.04407  | 0.0001648 | ZNF624(0)                        |
| rs56303920 | 17 | 16552840  | 0.0001383 | 0.04407  | 0.0001648 | ZNF624(0)                        |
| rs7213274  | 17 | 16551312  | 0.0001383 | 0.04407  | 0.0001648 | ZNF624(0)                        |
| rs4719062  | 7  | 70545120  | 0.000139  | 0.05596  | 0.000143  | .                                |
| rs10830139 | 10 | 129405859 | 0.0001391 | -0.03416 | 0.0000879 | .                                |
| rs2903441  | 7  | 70543038  | 0.0001393 | 0.05586  | 0.0001424 | .                                |
| rs2128184  | 9  | 29636965  | 0.0001399 | -0.09482 | 0.0000923 | .                                |
| rs890274   | 4  | 138187493 | 0.0001399 | 0.03844  | 0.0001166 | .                                |
| rs10790937 | 11 | 127868906 | 0.0001405 | 0.03847  | 0.0001985 | .                                |
| rs10860260 | 12 | 98317489  | 0.0001409 | -0.03518 | 0.0000964 | .                                |
| rs12718046 | 3  | 197256723 | 0.0001409 | -0.03799 | 0.0001617 | BDH1(0)                          |
| rs28465319 | 17 | 16519075  | 0.0001412 | 0.044    | 0.0001688 | ZNF624(-4.972kb)                 |
| rs62072848 | 17 | 16518276  | 0.0001412 | 0.044    | 0.0001688 | ZNF624(-5.771kb)                 |
| rs17175227 | 14 | 70502050  | 0.0001417 | -0.1608  | 0.0001342 | SMOC1(+2.967kb) SLC8A3(-8.883kb) |
| rs1005370  | 17 | 16510468  | 0.0001419 | 0.04398  | 0.0001696 | ZNF624(-13.58kb)                 |
| rs9901145  | 17 | 16511821  | 0.0001419 | 0.04398  | 0.0001696 | ZNF624(-12.23kb)                 |
| rs13284438 | 9  | 99111512  | 0.0001421 | 0.09524  | 0.0000768 | SLC35D2(0)                       |
| rs7102071  | 11 | 13014088  | 0.0001422 | 0.09339  | 0.0002064 | RASSF10(-16.61kb)                |
| rs12635170 | 3  | 64257799  | 0.0001428 | 0.08557  | 0.0002124 | .                                |
| rs59786893 | 11 | 127890990 | 0.000143  | 0.03461  | 0.0001301 | .                                |
| rs7570493  | 2  | 156542618 | 0.000143  | 0.03635  | 0.0001333 | .                                |
| rs539798   | 11 | 127814490 | 0.0001438 | -0.04278 | 0.0001058 | .                                |
| rs4899243  | 14 | 68953817  | 0.000144  | -0.04416 | 0.0001092 | RAD51L1(0)                       |
| rs987793   | 10 | 99868961  | 0.0001456 | -0.03396 | 0.0001207 | .                                |
| rs1005921  | 20 | 22980146  | 0.0001465 | 0.04416  | 0.0001567 | .                                |
| rs3966077  | 14 | 68855370  | 0.0001466 | -0.04367 | 0.000107  | RAD51L1(0)                       |
| rs948251   | 11 | 127864779 | 0.0001467 | 0.03834  | 0.000206  | .                                |
| rs6123492  | 20 | 54082465  | 0.0001474 | -0.03587 | 0.0001648 | .                                |
| rs11972870 | 7  | 70527184  | 0.0001479 | 0.05785  | 0.0001492 | .                                |
| rs6943728  | 7  | 47835814  | 0.0001479 | 0.03361  | 0.0001482 | PKD1L1(0) FLJ21075(0)            |
| rs779459   | 6  | 69949767  | 0.0001479 | 0.05754  | 0.0001618 | BAI3(0)                          |
| rs16878340 | 5  | 7108833   | 0.0001486 | -0.03807 | 0.0001294 | .                                |
| rs7102989  | 11 | 127885990 | 0.0001487 | 0.03454  | 0.0001343 | .                                |
| rs948255   | 11 | 127818348 | 0.0001492 | -0.04291 | 0.0001093 | .                                |
| rs9677637  | 2  | 156522004 | 0.0001493 | 0.03632  | 0.0001405 | .                                |
| rs1297415  | 6  | 70045307  | 0.0001499 | -0.03291 | 0.0001535 | BAI3(0)                          |
| rs2183152  | 1  | 104751785 | 0.0001499 | 0.05788  | 0.0001425 | .                                |
| rs3736859  | 13 | 76408249  | 0.0001501 | 0.07607  | 0.0001645 | LMO7(0)                          |
| rs6502514  | 17 | 16508900  | 0.0001502 | 0.04436  | 0.0001882 | ZNF624(-15.15kb)                 |
| rs57448521 | 17 | 16506322  | 0.0001503 | 0.04385  | 0.000179  | ZNF624(-17.73kb)                 |

|            |    |           |           |          |           |                                   |
|------------|----|-----------|-----------|----------|-----------|-----------------------------------|
| rs2866962  | 7  | 70566575  | 0.0001504 | 0.05626  | 0.0001593 | .                                 |
| rs10012873 | 4  | 138088025 | 0.0001509 | -0.1184  | 0.0001325 | .                                 |
| rs10049505 | 4  | 138085107 | 0.0001509 | -0.1184  | 0.0001325 | .                                 |
| rs28710310 | 4  | 138087461 | 0.0001509 | -0.1184  | 0.0001325 | .                                 |
| rs3775465  | 4  | 90827466  | 0.0001509 | -0.1184  | 0.0001557 | MMRN1(0)                          |
| rs3933106  | 4  | 138089073 | 0.0001509 | -0.1184  | 0.0001325 | .                                 |
| rs59414474 | 4  | 138088312 | 0.0001509 | 0.06919  | 0.0001325 | .                                 |
| rs321641   | 4  | 48003376  | 0.000151  | -0.04383 | 0.0001403 | NPAL1(-15.41kb)                   |
| rs7676591  | 4  | 136244789 | 0.0001514 | -0.03458 | 0.0001112 | .                                 |
| rs10947050 | 6  | 30040291  | 0.0001516 | -0.03765 | 0.0001264 | ZNRD1(+7.605kb) RNF39(0) PPP1R11  |
| rs12200084 | 6  | 30040603  | 0.0001516 | -0.03765 | 0.0001264 | ZNRD1(+7.917kb) RNF39(0) PPP1R11  |
| rs10893794 | 11 | 127845087 | 0.0001522 | 0.03452  | 0.0001407 | .                                 |
| rs4635094  | 11 | 127849304 | 0.0001523 | 0.03449  | 0.0001422 | .                                 |
| rs10813147 | 9  | 29638941  | 0.0001525 | 0.03802  | 0.0001033 | .                                 |
| rs28865976 | 17 | 16515274  | 0.0001526 | 0.04378  | 0.0001827 | ZNF624(-8.773kb)                  |
| rs5000166  | 17 | 16565685  | 0.0001527 | 0.04372  | 0.0001864 | ZNF624(+8.527kb)                  |
| rs12419494 | 11 | 127887942 | 0.0001528 | 0.03456  | 0.0001361 | .                                 |
| rs62459617 | 7  | 70595559  | 0.0001533 | 0.1428   | 0.0001475 | WBSCR17(-2.229kb)                 |
| rs34238791 | 4  | 90744216  | 0.0001536 | 0.07821  | 0.0001536 | SNCA(0)                           |
| rs10786388 | 10 | 99861420  | 0.000154  | 0.03334  | 0.0001391 | .                                 |
| rs3904809  | 13 | 45337301  | 0.0001543 | -0.04971 | 0.0001071 | .                                 |
| rs16959857 | 17 | 16523397  | 0.0001545 | 0.04372  | 0.0001855 | ZNF624(-0.65kb)                   |
| rs35990057 | 9  | 99184552  | 0.0001545 | 0.04372  | 0.0000849 | ZNF367(+3.883kb)                  |
| rs9890698  | 17 | 16522280  | 0.0001545 | 0.04372  | 0.0001855 | ZNF624(-1.767kb)                  |
| rs9907785  | 17 | 16528031  | 0.0001545 | 0.04372  | 0.0001855 | ZNF624(0)                         |
| rs9909044  | 17 | 16528683  | 0.0001545 | 0.08803  | 0.0001855 | ZNF624(0)                         |
| rs4945055  | 11 | 75966000  | 0.0001547 | -0.04324 | 0.000154  | .                                 |
| rs9911820  | 17 | 16565132  | 0.0001548 | 0.04455  | 0.0002058 | ZNF624(+7.974kb)                  |
| rs28458310 | 17 | 16552398  | 0.0001552 | 0.04389  | 0.0001862 | ZNF624(0)                         |
| rs7240902  | 18 | 57142204  | 0.0001554 | -0.08191 | 0.0001413 | CCBE1(0)                          |
| rs4236243  | 7  | 70566684  | 0.0001557 | 0.05613  | 0.0001653 | .                                 |
| rs1425214  | 11 | 127835471 | 0.000156  | 0.0345   | 0.0001393 | .                                 |
| rs7976793  | 12 | 54073069  | 0.000156  | -0.03735 | 0.0001432 | ATP5G2(+2.557kb)                  |
| rs4352086  | 17 | 16544463  | 0.0001571 | 0.0438   | 0.0001853 | ZNF624(0)                         |
| rs9910842  | 17 | 16546049  | 0.0001571 | 0.0438   | 0.0001853 | ZNF624(0)                         |
| rs10819136 | 9  | 128966109 | 0.0001572 | 0.03593  | 0.0001521 | .                                 |
| rs7590955  | 2  | 226048074 | 0.0001572 | 0.03642  | 0.0001938 | .                                 |
| rs9378188  | 6  | 29935166  | 0.0001577 | -0.0423  | 0.0001391 | HLA-A29.1(0) HCG9(-7.725kb)       |
| rs6552739  | 4  | 184989191 | 0.0001578 | 0.03532  | 0.0001582 | .                                 |
| rs12635376 | 3  | 82547468  | 0.0001581 | -0.0534  | 0.0001343 | .                                 |
| rs11221126 | 11 | 127870977 | 0.0001582 | 0.03447  | 0.000142  | .                                 |
| rs11657919 | 17 | 8554157   | 0.000159  | 0.04611  | 0.0001278 | .                                 |
| rs7136342  | 12 | 91431056  | 0.000159  | 0.03515  | 0.0001424 | KERA(-13.21kb)                    |
| rs11189529 | 10 | 100026127 | 0.0001594 | -0.0349  | 0.0001165 | LOXL4(0)                          |
| rs16945879 | 16 | 77572637  | 0.0001594 | -0.0351  | 0.0001634 | .                                 |
| rs10893799 | 11 | 127868642 | 0.0001596 | 0.03417  | 0.000147  | .                                 |
| rs10836956 | 11 | 4946047   | 0.0001605 | 0.07166  | 0.0001619 | OR51G1(+0.478kb) OR51G2(+9.154kb) |

|            |    |           |           |          |           |                                   |
|------------|----|-----------|-----------|----------|-----------|-----------------------------------|
| rs10520868 | 5  | 20556442  | 0.000161  | -0.1555  | 0.0001476 | .                                 |
| rs17839233 | 5  | 20551462  | 0.000161  | -0.1555  | 0.0001476 | .                                 |
| rs57444212 | 5  | 20554681  | 0.000161  | -0.1555  | 0.0001476 | .                                 |
| rs62354269 | 5  | 20537473  | 0.000161  | -0.1555  | 0.0001476 | .                                 |
| rs62354270 | 5  | 20539634  | 0.000161  | -0.1555  | 0.0001476 | .                                 |
| rs62354273 | 5  | 20540705  | 0.000161  | -0.1555  | 0.0001476 | .                                 |
| rs62354274 | 5  | 20541140  | 0.000161  | -0.1555  | 0.0001476 | .                                 |
| rs62354278 | 5  | 20549009  | 0.000161  | -0.1555  | 0.0001476 | .                                 |
| rs62354279 | 5  | 20550711  | 0.000161  | -0.1555  | 0.0001476 | .                                 |
| rs62354280 | 5  | 20550984  | 0.000161  | -0.1555  | 0.0001476 | .                                 |
| rs62354281 | 5  | 20552714  | 0.000161  | -0.1555  | 0.0001476 | .                                 |
| rs62354282 | 5  | 20552817  | 0.000161  | -0.1555  | 0.0001476 | .                                 |
| rs62354283 | 5  | 20553147  | 0.000161  | -0.1555  | 0.0001476 | .                                 |
| rs62354286 | 5  | 20555163  | 0.000161  | -0.1555  | 0.0001476 | .                                 |
| rs62354287 | 5  | 20555460  | 0.000161  | -0.1555  | 0.0001476 | .                                 |
| rs62354289 | 5  | 20558873  | 0.000161  | -0.1555  | 0.0001476 | .                                 |
| rs62354290 | 5  | 20560256  | 0.000161  | -0.1555  | 0.0001476 | .                                 |
| rs11823780 | 11 | 127886890 | 0.0001618 | 0.03461  | 0.0001895 | .                                 |
| rs12448547 | 16 | 53694512  | 0.0001619 | -0.07453 | 0.0001211 | RPGRIP1L(0)                       |
| rs34802611 | 9  | 99176818  | 0.0001621 | 0.03421  | 0.0000921 | ZNF367(0)                         |
| rs35000618 | 9  | 99178779  | 0.0001621 | 0.08627  | 0.0000921 | ZNF367(0)                         |
| rs35590230 | 9  | 99179653  | 0.0001621 | 0.08627  | 0.0000921 | ZNF367(0)                         |
| rs4497423  | 11 | 127856911 | 0.0001621 | 0.08627  | 0.0001536 | .                                 |
| rs10883043 | 10 | 99862371  | 0.0001626 | 0.03334  | 0.0001382 | .                                 |
| rs1013035  | 11 | 127863599 | 0.0001629 | 0.03415  | 0.0001493 | .                                 |
| rs13030671 | 2  | 195811734 | 0.0001629 | -0.05532 | 0.0001428 | .                                 |
| rs57663699 | 5  | 94131229  | 0.0001631 | -0.05367 | 0.0001172 | MCTP1(0)                          |
| rs58524092 | 17 | 71024419  | 0.0001637 | -0.08066 | 0.0002373 | SLC39A11(0)                       |
| rs62354275 | 5  | 20542622  | 0.0001638 | -0.1554  | 0.0001497 | .                                 |
| rs17334002 | 1  | 204306109 | 0.0001641 | -0.03672 | 0.0001179 | PLEKHA6(0)                        |
| rs4959040  | 6  | 29962889  | 0.0001641 | -0.03763 | 0.0001414 | HLA-A29.1(0) HCG9(+16.71kb)       |
| rs13301712 | 9  | 99185557  | 0.0001642 | 0.0862   | 0.0000933 | ZNF367(+4.888kb)                  |
| rs9393986  | 6  | 29973526  | 0.0001644 | -0.03784 | 0.0001323 | HLA-A29.1(0)                      |
| rs228734   | 1  | 7836208   | 0.0001648 | -0.05438 | 0.0001574 | VAMP3(0) PER3(-8.554kb) CAMTA1(+) |
| rs1536152  | 10 | 99986581  | 0.0001649 | -0.03473 | 0.0001355 | C10orf28(0)                       |
| rs12566743 | 1  | 91838025  | 0.0001652 | -0.06976 | 0.0001474 | HFM1(0)                           |
| rs17405885 | 1  | 204301822 | 0.0001654 | -0.03648 | 0.000121  | PLEKHA6(0)                        |
| rs1504595  | 1  | 57670351  | 0.0001656 | -0.06316 | 0.0001424 | DAB1(0)                           |
| rs12456250 | 18 | 57169155  | 0.0001657 | -0.08374 | 0.0001495 | CCBE1(0)                          |
| rs13398477 | 2  | 84382994  | 0.0001659 | 0.04397  | 0.0001583 | .                                 |
| rs8082650  | 17 | 16567813  | 0.0001659 | 0.1576   | 0.0002091 | ZNF624(+10.65kb)                  |
| rs1861933  | 12 | 68842405  | 0.0001662 | 0.04193  | 0.0002311 | .                                 |
| rs32216    | 5  | 127640076 | 0.0001662 | -0.0382  | 0.0001619 | FBN2(0)                           |
| rs2064910  | 14 | 68852102  | 0.0001665 | -0.04311 | 0.0001218 | RAD51L1(0)                        |
| rs7110845  | 11 | 120175749 | 0.000167  | -0.03316 | 0.0001617 | POU2F3(0)                         |
| rs7926928  | 11 | 127879690 | 0.0001672 | 0.03829  | 0.0002316 | .                                 |
| rs7102644  | 11 | 127885902 | 0.0001674 | 0.03825  | 0.0002334 | .                                 |

|            |    |           |           |          |           |                                  |
|------------|----|-----------|-----------|----------|-----------|----------------------------------|
| rs149766   | 1  | 57642394  | 0.0001676 | -0.0609  | 0.0001125 | DAB1(0)                          |
| rs6503066  | 17 | 7766228   | 0.0001678 | 0.04944  | 0.0001664 | TMEM88(+6.811kb) LSMD1(+5.056kb) |
| rs11771281 | 7  | 67137926  | 0.0001679 | -0.05285 | 0.0001483 | .                                |
| rs9812808  | 3  | 172134909 | 0.0001689 | 0.107    | 0.0001669 | FNDC3B(+16.42kb)                 |
| rs9868789  | 3  | 172142717 | 0.0001689 | 0.107    | 0.0001669 | .                                |
| rs9990128  | 3  | 172143378 | 0.0001689 | 0.107    | 0.0001669 | GHSR(-19.57kb)                   |
| rs10509311 | 10 | 75521251  | 0.0001695 | -0.06079 | 0.0001524 | SEC24C(0) FUT11(-10.8kb)         |
| rs62457142 | 7  | 67137094  | 0.0001695 | -0.05254 | 0.0001495 | .                                |
| rs2162198  | 4  | 138178012 | 0.0001699 | -0.0941  | 0.0001411 | .                                |
| rs7437150  | 4  | 138178129 | 0.0001699 | -0.0941  | 0.0001411 | .                                |
| rs35453136 | 11 | 127848160 | 0.0001705 | 0.03843  | 0.0002418 | .                                |
| rs4713279  | 6  | 29944896  | 0.0001706 | -0.03773 | 0.0001414 | HLA-A29.1(0) HCG9(0)             |
| rs4961343  | 8  | 142262081 | 0.0001708 | 0.03625  | 0.000153  | .                                |
| rs11934190 | 4  | 78337309  | 0.000171  | 0.04935  | 0.0002201 | .                                |
| rs35170911 | 9  | 99198107  | 0.0001711 | 0.08588  | 0.0000988 | ZNF367(+17.44kb) HABP4(-14.31kb) |
| rs190450   | 5  | 127614472 | 0.0001714 | -0.03777 | 0.0001741 | FBN2(0)                          |
| rs17780227 | 18 | 57149980  | 0.0001717 | -0.08073 | 0.0001593 | CCBE1(0)                         |
| rs6069295  | 20 | 54083347  | 0.0001718 | -0.03596 | 0.0001817 | .                                |
| rs1380263  | 2  | 72101633  | 0.000172  | 0.03333  | 0.0001828 | .                                |
| rs12291820 | 11 | 6511472   | 0.0001723 | -0.03544 | 0.0001591 | TRIM3(+16.27kb) FXC1(+5.561kb) C |
| rs4758421  | 11 | 6510395   | 0.0001723 | -0.03544 | 0.0001591 | TRIM3(+15.19kb) FXC1(+4.484kb) C |
| rs362523   | 6  | 29545284  | 0.0001728 | -0.04422 | 0.0001557 | UBD(+17.58kb) OR2H2(-10.4kb)     |
| rs12126570 | 1  | 195929779 | 0.0001733 | 0.1508   | 0.0001626 | .                                |
| rs13043784 | 20 | 54075162  | 0.0001734 | -0.03538 | 0.0001838 | .                                |
| rs8074464  | 17 | 16534594  | 0.0001735 | 0.04353  | 0.0002033 | ZNF624(0)                        |
| rs9894637  | 17 | 16535297  | 0.0001735 | 0.04353  | 0.0002033 | ZNF624(0)                        |
| rs12481038 | 20 | 54081022  | 0.0001736 | -0.03602 | 0.0001887 | .                                |
| rs605139   | 6  | 54318303  | 0.0001736 | -0.0729  | 0.0001586 | .                                |
| rs11215403 | 11 | 115058585 | 0.0001738 | 0.03794  | 0.0002116 | CADM1(0)                         |
| rs9911162  | 17 | 16546378  | 0.0001738 | 0.04358  | 0.000205  | ZNF624(0)                        |
| rs2305683  | 4  | 23882499  | 0.0001741 | 0.07593  | 0.0001737 | PPARGC1A(0)                      |
| rs1940745  | 11 | 127859960 | 0.0001744 | 0.03403  | 0.0001607 | .                                |
| rs61839730 | 1  | 242839751 | 0.000175  | 0.04526  | 0.0001918 | .                                |
| rs9911677  | 17 | 16537397  | 0.0001751 | 0.04288  | 0.0002165 | ZNF624(0)                        |
| rs7607630  | 2  | 3156098   | 0.0001755 | -0.04404 | 0.0002907 | .                                |
| rs7103123  | 11 | 127879024 | 0.0001763 | 0.03434  | 0.000159  | .                                |
| rs7312853  | 12 | 54073597  | 0.0001764 | -0.03658 | 0.0001711 | ATP5G2(+3.085kb)                 |
| rs9600559  | 13 | 76409870  | 0.0001765 | 0.07556  | 0.0001817 | LMO7(0)                          |
| rs4791672  | 17 | 16531261  | 0.0001772 | 0.04339  | 0.0002103 | ZNF624(0)                        |
| rs6503067  | 17 | 7770060   | 0.0001776 | 0.04946  | 0.0001663 | TMEM88(+10.64kb) LSMD1(+8.888kb) |
| rs7566038  | 2  | 156492878 | 0.0001776 | 0.03615  | 0.0001766 | .                                |
| rs9919601  | 11 | 75963008  | 0.0001778 | -0.04386 | 0.0001671 | .                                |
| rs11683242 | 2  | 240500294 | 0.0001779 | -0.04818 | 0.0002548 | .                                |
| rs12417199 | 11 | 127848405 | 0.0001786 | 0.0384   | 0.0002539 | .                                |
| rs8125772  | 20 | 54082179  | 0.0001788 | -0.03601 | 0.0001927 | .                                |
| rs2612371  | 18 | 73631332  | 0.000179  | -0.05413 | 0.000147  | .                                |
| rs4961260  | 8  | 142270450 | 0.0001803 | 0.03609  | 0.0001694 | .                                |

|            |    |           |           |          |           |                            |
|------------|----|-----------|-----------|----------|-----------|----------------------------|
| rs55920274 | 17 | 16541658  | 0.0001812 | 0.04337  | 0.0002132 | ZNF624(0)                  |
| rs9439457  | 1  | 1449746   | 0.0001814 | 0.1616   | 0.000169  | ATAD3A(0) ATAD3B(+18.16kb) |
| rs7333314  | 13 | 45335782  | 0.0001818 | -0.04923 | 0.0001262 | .                          |
| rs1432523  | 2  | 183023484 | 0.0001822 | 0.03413  | 0.0002187 | PDE1A(0)                   |
| rs7137217  | 12 | 127980829 | 0.0001823 | -0.09796 | 0.0001764 | .                          |
| rs12023102 | 1  | 204310524 | 0.000183  | -0.03527 | 0.0001315 | PLEKHA6(0)                 |
| rs12608303 | 18 | 57146260  | 0.0001834 | -0.08046 | 0.0001674 | CCBE1(0)                   |
| rs1822031  | 4  | 47991225  | 0.0001836 | -0.0428  | 0.0001756 | .                          |
| rs1837519  | 4  | 47991016  | 0.0001836 | -0.0428  | 0.0001756 | .                          |
| rs224798   | 4  | 47988659  | 0.0001836 | -0.0428  | 0.0001756 | .                          |
| rs2661536  | 4  | 47991569  | 0.0001836 | -0.0428  | 0.0001756 | .                          |
| rs35897584 | 4  | 90742692  | 0.0001841 | 0.07868  | 0.0001845 | SNCA(0)                    |
| rs6552740  | 4  | 184989428 | 0.0001843 | 0.03486  | 0.000185  | .                          |
| rs4854195  | 2  | 3157264   | 0.0001847 | -0.04391 | 0.0003063 | .                          |
| rs1026325  | 2  | 3157805   | 0.0001849 | -0.04239 | 0.0003984 | .                          |
| rs1940740  | 11 | 127874399 | 0.0001851 | 0.03398  | 0.0001706 | .                          |
| rs4945056  | 11 | 75969749  | 0.0001857 | -0.04417 | 0.0001763 | .                          |
| rs314216   | 6  | 69875285  | 0.0001861 | 0.05942  | 0.0001912 | BAI3(0)                    |
| rs112886   | 4  | 14430912  | 0.0001862 | 0.0433   | 0.0001413 | .                          |
| rs7217544  | 17 | 16533978  | 0.0001862 | 0.0433   | 0.0002189 | ZNF624(0)                  |
| rs9906728  | 17 | 16533676  | 0.0001862 | 0.0497   | 0.0002189 | ZNF624(0)                  |
| rs11185393 | 1  | 104752001 | 0.0001865 | -0.03248 | 0.0001796 | .                          |
| rs10454686 | 14 | 68839917  | 0.0001866 | -0.04317 | 0.0001287 | RAD51L1(0)                 |
| rs2924502  | 2  | 3271056   | 0.0001866 | 0.0334   | 0.0002263 | TSSC1(0)                   |
| rs6548147  | 2  | 3272117   | 0.0001866 | 0.0334   | 0.0002263 | TSSC1(0)                   |
| rs4791673  | 17 | 16533133  | 0.0001868 | 0.04337  | 0.0002178 | ZNF624(0)                  |
| rs3852926  | 20 | 54079903  | 0.0001873 | -0.03511 | 0.0002073 | .                          |
| rs1893167  | 11 | 127884104 | 0.0001875 | 0.03403  | 0.0001702 | .                          |
| rs12448173 | 16 | 54195228  | 0.000188  | 0.07118  | 0.0001863 | .                          |
| rs2530414  | 7  | 67142581  | 0.000188  | -0.05198 | 0.0001678 | .                          |
| rs2714610  | 7  | 67141247  | 0.000188  | -0.05198 | 0.0001678 | .                          |
| rs2714618  | 7  | 67142223  | 0.000188  | -0.05198 | 0.0001678 | .                          |
| rs62459173 | 7  | 67139898  | 0.000188  | -0.05198 | 0.0001678 | .                          |
| rs314190   | 6  | 69836598  | 0.0001882 | 0.06348  | 0.0001915 | BAI3(0)                    |
| rs34603378 | 9  | 99113810  | 0.0001888 | 0.08246  | 0.0001106 | SLC35D2(0)                 |
| rs35616305 | 9  | 99112299  | 0.0001888 | 0.08246  | 0.0001106 | SLC35D2(0)                 |
| rs4792757  | 17 | 16520433  | 0.000189  | 0.04334  | 0.0002247 | ZNF624(-3.614kb)           |
| rs1593421  | 11 | 127877747 | 0.0001896 | 0.03393  | 0.0001744 | .                          |
| rs1834470  | 11 | 127877798 | 0.0001896 | 0.03393  | 0.0001744 | .                          |
| rs13284545 | 9  | 99118230  | 0.0001908 | 0.08176  | 0.0001141 | SLC35D2(0)                 |
| rs7930837  | 11 | 127880688 | 0.0001909 | 0.03393  | 0.0001748 | .                          |
| rs11760542 | 7  | 67137287  | 0.0001911 | 0.06394  | 0.0001679 | .                          |
| rs12643823 | 4  | 90845731  | 0.0001911 | -0.05225 | 0.0001949 | MMRN1(0)                   |
| rs314208   | 6  | 69866117  | 0.0001917 | 0.05777  | 0.0001957 | BAI3(0)                    |
| rs4939717  | 18 | 50523335  | 0.000193  | 0.04871  | 0.0001941 | DCC(0)                     |
| rs4792762  | 17 | 16564034  | 0.0001931 | 0.04333  | 0.0002277 | ZNF624(+6.876kb)           |
| rs3113879  | 4  | 48002327  | 0.0001933 | -0.04364 | 0.0001711 | NPAL1(-16.46kb)            |

|            |    |           |           |          |           |                                  |
|------------|----|-----------|-----------|----------|-----------|----------------------------------|
| rs35657516 | 4  | 14555254  | 0.0001935 | 0.04225  | 0.0001827 | .                                |
| rs7638381  | 3  | 197254550 | 0.0001936 | -0.03685 | 0.0002182 | BDH1(0)                          |
| rs8074487  | 17 | 16550286  | 0.0001938 | 0.04378  | 0.0002397 | ZNF624(0)                        |
| rs2877712  | 1  | 181657481 | 0.0001939 | -0.04465 | 0.0001645 | CACNA1E(0)                       |
| rs59059734 | 2  | 149015985 | 0.000194  | 0.16     | 0.0000663 | .                                |
| rs55654479 | 14 | 22182075  | 0.0001941 | -0.04896 | 0.0002092 | .                                |
| rs2691768  | 2  | 156497167 | 0.0001948 | 0.03597  | 0.000195  | .                                |
| rs2744042  | 6  | 19183178  | 0.0001951 | -0.04079 | 0.0002951 | .                                |
| rs619152   | 13 | 110939497 | 0.0001954 | 0.03537  | 0.0002055 | COL4A1(0)                        |
| rs35504233 | 12 | 106271837 | 0.0001955 | -0.03339 | 0.0001341 | .                                |
| rs9950935  | 18 | 2584842   | 0.0001961 | 0.0692   | 0.0001337 | NDC80(0) METTL4(+13.35kb)        |
| rs7642247  | 3  | 89239473  | 0.0001963 | 0.04051  | 0.0002308 | EPHA3(0)                         |
| rs9878894  | 3  | 89235886  | 0.0001963 | 0.04051  | 0.0002308 | EPHA3(0)                         |
| rs2934131  | 5  | 152851598 | 0.0001967 | 0.1095   | 0.0001878 | GRIA1(-18.48kb)                  |
| rs12421970 | 11 | 127816603 | 0.000197  | 0.03793  | 0.0002813 | .                                |
| rs9854754  | 3  | 89192764  | 0.0001972 | 0.03985  | 0.0002317 | EPHA3(0)                         |
| rs12616908 | 2  | 81396414  | 0.0001978 | 0.05156  | 0.000392  | .                                |
| rs1517468  | 2  | 156500207 | 0.000198  | -0.03319 | 0.0001944 | .                                |
| rs7600696  | 2  | 11359399  | 0.000198  | 0.03583  | 0.0001571 | ROCK2(0)                         |
| rs7617106  | 3  | 197241981 | 0.000198  | -0.04026 | 0.0003606 | BDH1(0)                          |
| rs59978734 | 14 | 86202366  | 0.0001983 | 0.1264   | 0.0001973 | .                                |
| rs1233383  | 6  | 29565825  | 0.0001986 | -0.04662 | 0.0001838 | OR2H2(+9.08kb) GABBR1(-4.179kb)  |
| rs2256920  | 11 | 6508124   | 0.0001987 | 0.03398  | 0.0002418 | TRIM3(+12.92kb) FXC1(+2.213kb) C |
| rs13412763 | 2  | 50779372  | 0.0002004 | -0.04191 | 0.0002339 | NRXN1(0)                         |
| rs13080791 | 3  | 82541304  | 0.0002006 | 0.03587  | 0.0001632 | .                                |
| rs2677473  | 2  | 156493244 | 0.0002006 | -0.05372 | 0.0001998 | .                                |
| rs1113103  | 10 | 129406109 | 0.0002007 | -0.03334 | 0.0001254 | .                                |
| rs13146211 | 4  | 114436725 | 0.0002014 | -0.03819 | 0.000214  | CAMK2D(0)                        |
| rs10893793 | 11 | 127843987 | 0.0002017 | 0.0397   | 0.0002691 | .                                |
| rs10748723 | 10 | 100025816 | 0.0002018 | -0.03455 | 0.00015   | LOXL4(0)                         |
| rs35028684 | 22 | 27548275  | 0.0002018 | 0.1273   | 0.0001804 | .                                |
| rs8044816  | 16 | 54202699  | 0.0002019 | 0.07108  | 0.0002068 | .                                |
| rs12447481 | 16 | 53748969  | 0.0002041 | -0.06896 | 0.0001508 | RPGRIP1L(+11.2kb) FTO(0)         |
| rs12278524 | 11 | 127874626 | 0.0002042 | 0.03403  | 0.0001819 | .                                |
| rs12047622 | 1  | 204313709 | 0.0002047 | -0.0367  | 0.0001511 | PLEKHA6(0)                       |
| rs13296316 | 9  | 99118443  | 0.0002051 | 0.08168  | 0.0001214 | SLC35D2(0)                       |
| rs35436016 | 9  | 99118866  | 0.0002051 | 0.08168  | 0.0001214 | SLC35D2(0)                       |
| rs2567610  | 20 | 22978973  | 0.0002056 | 0.04299  | 0.0001836 | .                                |
| rs779461   | 6  | 69944886  | 0.0002059 | 0.05675  | 0.0002243 | BAI3(0)                          |
| rs10246967 | 7  | 25461265  | 0.000206  | -0.03945 | 0.0002896 | .                                |
| rs10233985 | 7  | 25457918  | 0.0002064 | -0.03942 | 0.0002863 | .                                |
| rs28492965 | 7  | 25457164  | 0.0002064 | -0.03942 | 0.0002863 | .                                |
| rs7789959  | 7  | 25457455  | 0.0002064 | -0.03942 | 0.0002863 | .                                |
| rs7805338  | 7  | 25457327  | 0.0002064 | -0.03942 | 0.0002863 | .                                |
| rs3113877  | 4  | 47998807  | 0.0002066 | 0.04316  | 0.0001978 | NPAL1(-19.98kb)                  |
| rs8074285  | 17 | 16534501  | 0.0002066 | -0.04242 | 0.0002424 | ZNF624(0)                        |
| rs11676672 | 2  | 72101295  | 0.0002069 | 0.03511  | 0.0002401 | .                                |

|            |    |           |           |          |           |                                  |
|------------|----|-----------|-----------|----------|-----------|----------------------------------|
| rs1414192  | 21 | 32735471  | 0.0002074 | 0.04119  | 0.0001907 | TIAM1(0)                         |
| rs12778335 | 10 | 100025095 | 0.0002077 | -0.03434 | 0.0001526 | LOXL4(0)                         |
| rs1601150  | 4  | 136214127 | 0.0002078 | -0.03354 | 0.0001611 | .                                |
| rs469750   | 5  | 127637634 | 0.0002084 | -0.03762 | 0.0002082 | FBN2(0)                          |
| rs10199250 | 2  | 2969221   | 0.0002085 | 0.05543  | 0.0002519 | .                                |
| rs10227348 | 7  | 25460383  | 0.0002086 | -0.03978 | 0.0002785 | .                                |
| rs10865636 | 3  | 89242743  | 0.0002088 | 0.04036  | 0.0002446 | EPHA3(0)                         |
| rs9810366  | 3  | 89245392  | 0.0002088 | 0.04036  | 0.0002446 | EPHA3(0)                         |
| rs12282257 | 11 | 6513966   | 0.0002089 | -0.03495 | 0.0001887 | TRIM3(+18.76kb) FXC1(+8.055kb) C |
| rs3016632  | 11 | 127845655 | 0.0002095 | -0.04133 | 0.0001461 | .                                |
| rs1610590  | 6  | 29677634  | 0.0002097 | 0.03527  | 0.0001807 | HLA-F(-13.48kb)                  |
| rs4479997  | 7  | 70524233  | 0.0002107 | 0.05375  | 0.0002039 | .                                |
| rs12406557 | 1  | 181659213 | 0.000211  | -0.04442 | 0.0001785 | CACNA1E(0)                       |
| rs12424729 | 12 | 54073928  | 0.0002111 | -0.03603 | 0.000205  | ATP5G2(+3.416kb)                 |
| rs62073660 | 17 | 16530537  | 0.0002111 | 0.04371  | 0.0002434 | ZNF624(0)                        |
| rs2030764  | 7  | 70558971  | 0.0002112 | -0.03324 | 0.0002189 | .                                |
| rs7072056  | 10 | 99892677  | 0.0002112 | 0.0541   | 0.0001787 | C10orf28(-1.703kb)               |
| rs402473   | 5  | 62558448  | 0.0002114 | 0.03702  | 0.0001194 | .                                |
| rs1610596  | 6  | 29681463  | 0.0002121 | 0.03523  | 0.0001859 | HLA-F(-9.653kb)                  |
| rs1610599  | 6  | 29681879  | 0.0002121 | 0.03523  | 0.0001859 | HLA-F(-9.237kb)                  |
| rs1611386  | 6  | 29680758  | 0.0002121 | 0.03523  | 0.0001859 | HLA-F(-10.36kb)                  |
| rs1611387  | 6  | 29680768  | 0.0002121 | 0.03523  | 0.0001859 | HLA-F(-10.35kb)                  |
| rs1611388  | 6  | 29680789  | 0.0002121 | 0.03523  | 0.0001859 | HLA-F(-10.33kb)                  |
| rs1611389  | 6  | 29680967  | 0.0002121 | 0.03523  | 0.0001859 | HLA-F(-10.15kb)                  |
| rs2517915  | 6  | 29682487  | 0.0002121 | 0.03523  | 0.0001859 | HLA-F(-8.629kb)                  |
| rs2524272  | 6  | 29682400  | 0.0002121 | 0.03523  | 0.0001859 | HLA-F(-8.716kb)                  |
| rs2524273  | 6  | 29680971  | 0.0002121 | 0.03523  | 0.0001859 | HLA-F(-10.14kb)                  |
| rs2524274  | 6  | 29680915  | 0.0002121 | 0.03523  | 0.0001859 | HLA-F(-10.2kb)                   |
| rs3129191  | 6  | 29682542  | 0.0002121 | 0.03523  | 0.0001859 | HLA-F(-8.574kb)                  |
| rs734260   | 6  | 29681087  | 0.0002121 | 0.03523  | 0.0001859 | HLA-F(-10.03kb)                  |
| rs7208075  | 17 | 16548595  | 0.0002125 | 0.04289  | 0.0002571 | ZNF624(0)                        |
| rs2714161  | 11 | 127847663 | 0.0002127 | -0.04124 | 0.0001496 | .                                |
| rs366734   | 5  | 62564881  | 0.0002143 | -0.03879 | 0.0001187 | .                                |
| rs7697831  | 4  | 114427805 | 0.0002143 | 0.03715  | 0.0002341 | CAMK2D(0)                        |
| rs1611382  | 6  | 29680543  | 0.0002144 | 0.03524  | 0.0001866 | HLA-F(-10.57kb)                  |
| rs12636819 | 3  | 82545990  | 0.0002147 | -0.0526  | 0.0001829 | .                                |
| rs9889227  | 17 | 16534851  | 0.0002157 | 0.04311  | 0.0002472 | ZNF624(0)                        |
| rs1610598  | 6  | 29681862  | 0.0002161 | 0.03521  | 0.0001886 | HLA-F(-9.254kb)                  |
| rs2241989  | 8  | 401789    | 0.0002163 | -0.04953 | 0.0002033 | FBXO25(0)                        |
| rs2123751  | 2  | 3159514   | 0.000217  | -0.04349 | 0.0003568 | .                                |
| rs12047262 | 1  | 204302820 | 0.0002171 | -0.03579 | 0.0001568 | PLEKHA6(0)                       |
| rs7812916  | 8  | 142263891 | 0.0002173 | 0.03591  | 0.0001895 | .                                |
| rs1611365  | 6  | 29679621  | 0.0002174 | 0.0353   | 0.0001897 | HLA-F(-11.49kb)                  |
| rs1611369  | 6  | 29679851  | 0.0002174 | 0.0353   | 0.0001897 | HLA-F(-11.27kb)                  |
| rs4876429  | 8  | 119806880 | 0.0002174 | -0.0493  | 0.0003536 | .                                |
| rs13128368 | 4  | 114437080 | 0.0002176 | 0.03416  | 0.0002305 | CAMK2D(0)                        |
| rs2155647  | 11 | 127863144 | 0.0002176 | -0.03794 | 0.0001994 | .                                |



|            |    |           |           |          |           |                                 |
|------------|----|-----------|-----------|----------|-----------|---------------------------------|
| rs5022192  | 7  | 47841738  | 0.0002184 | 0.03267  | 0.0002214 | PKD1L1(0) FLJ21075(0)           |
| rs9832319  | 3  | 89228774  | 0.0002193 | 0.04023  | 0.0002568 | EPHA3(0)                        |
| rs7221943  | 17 | 71011633  | 0.0002197 | -0.07896 | 0.0003261 | SLC39A11(0)                     |
| rs7545282  | 1  | 221203014 | 0.0002203 | 0.05683  | 0.0002124 | .                               |
| rs9803904  | 1  | 242816727 | 0.0002204 | 0.04665  | 0.0002574 | .                               |
| rs2275855  | 6  | 29976789  | 0.0002214 | -0.03689 | 0.0001886 | HLA-A29.1(0)                    |
| rs4492726  | 10 | 127951710 | 0.0002218 | -0.04155 | 0.0003528 | ADAM12(0)                       |
| rs10511715 | 9  | 23079238  | 0.000222  | -0.03406 | 0.000184  | .                               |
| rs975422   | 14 | 68848643  | 0.0002222 | -0.04223 | 0.0001692 | RAD51L1(0)                      |
| rs1440222  | 4  | 47999726  | 0.0002233 | -0.1005  | 0.0002243 | NPAL1(-19.06kb)                 |
| rs61990404 | 14 | 71507860  | 0.0002233 | -0.1005  | 0.000207  | PCNX(0)                         |
| rs61990406 | 14 | 71510786  | 0.0002233 | -0.04278 | 0.000207  | PCNX(0)                         |
| rs1611381  | 6  | 29680492  | 0.0002234 | 0.03513  | 0.0001953 | HLA-F(-10.62kb)                 |
| rs1611383  | 6  | 29680547  | 0.0002234 | 0.03513  | 0.0001953 | HLA-F(-10.57kb)                 |
| rs1611384  | 6  | 29680587  | 0.0002234 | 0.03513  | 0.0001953 | HLA-F(-10.53kb)                 |
| rs1611385  | 6  | 29680605  | 0.0002234 | 0.03513  | 0.0001953 | HLA-F(-10.51kb)                 |
| rs12954951 | 18 | 73661386  | 0.0002237 | -0.05531 | 0.0001858 | .                               |
| rs2870630  | 20 | 54079457  | 0.000224  | -0.03481 | 0.000244  | .                               |
| rs6980001  | 7  | 127951366 | 0.0002242 | 0.06954  | 0.0002236 | RBM28(0)                        |
| rs6980301  | 7  | 127951413 | 0.0002242 | 0.06954  | 0.0002236 | RBM28(0)                        |
| rs1940744  | 11 | 127854460 | 0.0002252 | 0.03734  | 0.0003159 | .                               |
| rs13397757 | 2  | 11370768  | 0.0002255 | -0.03344 | 0.0001753 | ROCK2(0)                        |
| rs4982487  | 14 | 22169400  | 0.0002258 | -0.04813 | 0.000246  | .                               |
| rs12960881 | 18 | 73671358  | 0.0002261 | -0.05526 | 0.0001875 | .                               |
| rs12961524 | 18 | 73671431  | 0.0002261 | -0.05526 | 0.0001875 | .                               |
| rs4891101  | 18 | 73670276  | 0.0002261 | -0.05526 | 0.0001875 | .                               |
| rs2088793  | 3  | 193473026 | 0.0002262 | 0.04201  | 0.0002541 | .                               |
| rs2088794  | 3  | 193473046 | 0.0002262 | 0.04201  | 0.0002541 | .                               |
| rs2088795  | 3  | 193473133 | 0.0002262 | 0.04201  | 0.0002541 | .                               |
| rs13248507 | 8  | 57517884  | 0.0002266 | 0.04824  | 0.0001755 | .                               |
| rs10893800 | 11 | 127869088 | 0.0002269 | 0.03735  | 0.0003079 | .                               |
| rs56243142 | 2  | 11333606  | 0.0002269 | -0.03295 | 0.0001781 | ROCK2(0) PQLC3(+14.61kb)        |
| rs265011   | 4  | 96413495  | 0.0002272 | 0.06493  | 0.0002266 | UNC5C(0)                        |
| rs9883681  | 3  | 89234576  | 0.0002282 | 0.04025  | 0.0002624 | EPHA3(0)                        |
| rs10839573 | 11 | 6551339   | 0.0002284 | 0.033    | 0.0002987 | C11orf47(+9.249kb)              |
| rs662044   | 11 | 127838210 | 0.0002285 | -0.04106 | 0.0001577 | .                               |
| rs7260235  | 19 | 16186772  | 0.0002286 | 0.04716  | 0.0002764 | TPM4(-0.552kb)                  |
| rs58263533 | 2  | 11329053  | 0.0002288 | -0.03292 | 0.0001781 | ROCK2(0) PQLC3(+10.05kb)        |
| rs1610592  | 6  | 29678470  | 0.0002289 | 0.0352   | 0.000198  | HLA-F(-12.65kb)                 |
| rs17710983 | 7  | 47903141  | 0.0002291 | 0.04729  | 0.0002575 | PKD1L1(0)                       |
| rs9292469  | 5  | 32840210  | 0.0002292 | 0.0343   | 0.000348  | .                               |
| rs61579967 | 4  | 90772725  | 0.0002295 | 0.08048  | 0.0002395 | SNCA(+14.59kb)                  |
| rs6816633  | 4  | 90765944  | 0.0002295 | 0.08048  | 0.0002395 | SNCA(+7.811kb)                  |
| rs57915808 | 2  | 3159228   | 0.0002297 | -0.04184 | 0.0004873 | .                               |
| rs1233384  | 6  | 29559295  | 0.00023   | -0.0463  | 0.0001914 | OR2H2(+2.55kb) GABBR1(-10.71kb) |
| rs11656870 | 17 | 8553853   | 0.0002301 | 0.03439  | 0.0001862 | MYH10(+19.82kb)                 |
| rs1861515  | 8  | 132721564 | 0.0002317 | -0.04576 | 0.0002919 | .                               |

|            |    |           |           |          |           |                                   |
|------------|----|-----------|-----------|----------|-----------|-----------------------------------|
| rs4902581  | 14 | 68890793  | 0.0002322 | -0.03591 | 0.0002569 | RAD51L1(0)                        |
| rs9827112  | 3  | 64985326  | 0.0002324 | 0.03582  | 0.0002123 | .                                 |
| rs2938901  | 9  | 81101577  | 0.0002327 | 0.0428   | 0.0002489 | .                                 |
| rs973999   | 7  | 25456741  | 0.0002333 | -0.03959 | 0.0003162 | .                                 |
| rs8090622  | 18 | 10703874  | 0.0002347 | 0.03699  | 0.0002161 | FAM38B(+6.06kb)                   |
| rs34708776 | 18 | 73663780  | 0.000235  | -0.05512 | 0.0001952 | .                                 |
| rs4891100  | 18 | 73662229  | 0.000235  | -0.05512 | 0.0001952 | .                                 |
| rs1610743  | 6  | 29678043  | 0.0002352 | 0.03503  | 0.0002029 | HLA-F(-13.07kb)                   |
| rs12965805 | 18 | 73671723  | 0.0002362 | -0.0551  | 0.0001959 | .                                 |
| rs1546423  | 18 | 73674924  | 0.0002362 | -0.0551  | 0.0001959 | .                                 |
| rs4891102  | 18 | 73673005  | 0.0002362 | -0.0551  | 0.0001959 | .                                 |
| rs1611376  | 6  | 29680142  | 0.0002366 | 0.03514  | 0.0002049 | HLA-F(-10.97kb)                   |
| rs1611378  | 6  | 29680205  | 0.0002366 | 0.03514  | 0.0002049 | HLA-F(-10.91kb)                   |
| rs7074057  | 10 | 129407130 | 0.0002367 | -0.03375 | 0.0001365 | .                                 |
| rs10132981 | 14 | 68840318  | 0.0002368 | -0.04232 | 0.0001684 | RAD51L1(0)                        |
| rs7845108  | 8  | 61917481  | 0.000237  | -0.1367  | 0.0002219 | .                                 |
| rs17016274 | 4  | 90761357  | 0.0002371 | 0.0803   | 0.0002474 | SNCA(+3.224kb)                    |
| rs1425862  | 11 | 127872870 | 0.0002372 | 0.03368  | 0.0002092 | .                                 |
| rs10242504 | 7  | 25460010  | 0.0002374 | -0.03906 | 0.0003252 | .                                 |
| rs6968142  | 7  | 25459633  | 0.0002374 | -0.03906 | 0.0003252 | .                                 |
| rs4944100  | 11 | 75964715  | 0.0002376 | -0.04221 | 0.0002296 | .                                 |
| rs9834433  | 3  | 89224260  | 0.0002379 | 0.04001  | 0.0002789 | EPHA3(0)                          |
| rs13423864 | 2  | 11347249  | 0.0002384 | -0.03285 | 0.0001881 | ROCK2(0)                          |
| rs36072395 | 2  | 11344568  | 0.0002384 | -0.03285 | 0.0001881 | ROCK2(0)                          |
| rs10813146 | 9  | 29633201  | 0.0002387 | 0.03739  | 0.0001593 | .                                 |
| rs4487001  | 18 | 73668913  | 0.0002406 | -0.05524 | 0.0001975 | .                                 |
| rs12199162 | 6  | 77324522  | 0.0002407 | 0.05495  | 0.0002392 | .                                 |
| rs34572702 | 9  | 99099412  | 0.0002407 | 0.08279  | 0.0001435 | SLC35D2(0)                        |
| rs916047   | 14 | 22115873  | 0.0002409 | 0.03381  | 0.0002346 | OR4E2(-17.42kb) OR10G2(+12.88kb)  |
| rs9883387  | 3  | 89178317  | 0.0002411 | 0.0395   | 0.0002768 | EPHA3(0)                          |
| rs850032   | 7  | 29683389  | 0.0002417 | -0.04093 | 0.0001748 | .                                 |
| rs12962817 | 18 | 63859306  | 0.0002422 | -0.03352 | 0.0002431 | .                                 |
| rs2110983  | 12 | 13890358  | 0.0002422 | 0.06687  | 0.0003049 | GRIN2B(0)                         |
| rs1940738  | 11 | 127870051 | 0.0002427 | 0.0333   | 0.0002232 | .                                 |
| rs1940739  | 11 | 127870372 | 0.0002427 | 0.0333   | 0.0002232 | .                                 |
| rs61783125 | 1  | 47060655  | 0.000243  | 0.1303   | 0.0002473 | MOBK2C(-12.73kb) MKNK1(0)         |
| rs2714614  | 7  | 67140419  | 0.0002435 | -0.05105 | 0.000217  | .                                 |
| rs35652871 | 5  | 159409578 | 0.0002436 | 0.08292  | 0.0001342 | ADRA1B(+9.561kb)                  |
| rs10793146 | 11 | 75964155  | 0.0002442 | -0.04241 | 0.0002335 | .                                 |
| rs1611366  | 6  | 29679760  | 0.0002444 | 0.03483  | 0.0002156 | HLA-F(-11.36kb)                   |
| rs7937380  | 11 | 115060167 | 0.0002446 | 0.03735  | 0.0002869 | CADM1(0)                          |
| rs1363950  | 19 | 16186598  | 0.0002448 | 0.04716  | 0.0002978 | TPM4(-0.726kb)                    |
| rs6923284  | 6  | 29816034  | 0.0002459 | -0.04672 | 0.000146  | HLA-G(+17.14kb)                   |
| rs8020038  | 14 | 22163479  | 0.0002459 | 0.04357  | 0.0002605 | .                                 |
| rs1619876  | 20 | 62137355  | 0.0002467 | -0.03551 | 0.0002213 | EEF1A2(+6.85kb) C20orf149(-14.78) |
| rs2744045  | 6  | 19179641  | 0.0002467 | 0.06415  | 0.000346  | .                                 |
| rs7547251  | 1  | 204308815 | 0.0002467 | -0.04001 | 0.0001846 | PLEKHA6(0)                        |

|            |    |           |           |          |           |                                |
|------------|----|-----------|-----------|----------|-----------|--------------------------------|
| rs16845552 | 3  | 172145043 | 0.0002474 | 0.103    | 0.000246  | GHSR(-17.91kb)                 |
| rs194277   | 5  | 127612979 | 0.0002483 | -0.03725 | 0.000241  | FBN2(0)                        |
| rs255695   | 5  | 127613299 | 0.0002483 | -0.03725 | 0.000241  | FBN2(0)                        |
| rs11621997 | 14 | 39169430  | 0.0002484 | -0.04985 | 0.0003714 | .                              |
| rs17152002 | 7  | 127959221 | 0.0002485 | 0.06783  | 0.0002499 | RBM28(0)                       |
| rs13007233 | 2  | 240501556 | 0.0002486 | -0.04694 | 0.0003655 | .                              |
| rs32205    | 5  | 127616518 | 0.000249  | -0.0369  | 0.0002496 | FBN2(0)                        |
| rs4792760  | 17 | 16563573  | 0.00025   | 0.04443  | 0.0002822 | ZNF624(+6.415kb)               |
| rs12964598 | 18 | 73656514  | 0.0002502 | -0.05498 | 0.0002085 | .                              |
| rs7120186  | 11 | 127888701 | 0.0002505 | 0.03721  | 0.0003496 | .                              |
| rs11211305 | 1  | 47044238  | 0.0002506 | 0.13     | 0.000255  | MKNK1(0)                       |
| rs11211310 | 1  | 47046035  | 0.0002506 | 0.13     | 0.000255  | MKNK1(0)                       |
| rs11211311 | 1  | 47047226  | 0.0002506 | 0.13     | 0.000255  | MKNK1(0)                       |
| rs12074458 | 1  | 47046930  | 0.0002506 | 0.13     | 0.000255  | MKNK1(0)                       |
| rs13169235 | 5  | 7109967   | 0.0002506 | 0.13     | 0.0002164 | .                              |
| rs41305866 | 1  | 47040766  | 0.0002506 | 0.13     | 0.000255  | MKNK1(0)                       |
| rs61783115 | 1  | 47039661  | 0.0002506 | -0.03705 | 0.000255  | MKNK1(0)                       |
| rs10969304 | 9  | 29641283  | 0.0002507 | 0.03731  | 0.0001666 | .                              |
| rs10514195 | 18 | 73679591  | 0.0002513 | -0.05493 | 0.000213  | .                              |
| rs10514196 | 18 | 73680098  | 0.0002513 | -0.05493 | 0.000213  | .                              |
| rs10514197 | 18 | 73680172  | 0.0002513 | -0.05493 | 0.000213  | .                              |
| rs9988835  | 11 | 75962112  | 0.0002514 | -0.04274 | 0.0002309 | .                              |
| rs1610587  | 6  | 29676551  | 0.0002515 | 0.03486  | 0.0002141 | HLA-F(-14.56kb)                |
| rs59168689 | 2  | 3249795   | 0.0002523 | 0.03289  | 0.0002013 | TSSC1(0)                       |
| rs4944099  | 11 | 75964644  | 0.0002525 | -0.04206 | 0.0002433 | .                              |
| rs7036104  | 9  | 29635944  | 0.0002526 | 0.03718  | 0.000177  | .                              |
| rs12990580 | 2  | 240504326 | 0.0002529 | -0.04661 | 0.0003745 | .                              |
| rs13412958 | 2  | 50779401  | 0.0002531 | 0.03603  | 0.0002926 | NRXN1(0)                       |
| rs16823150 | 2  | 183244353 | 0.0002531 | -0.04123 | 0.0004129 | PDE1A(0)                       |
| rs11158737 | 14 | 68880574  | 0.0002535 | -0.03998 | 0.0001873 | RAD51L1(0)                     |
| rs36068876 | 5  | 159409793 | 0.0002539 | 0.08271  | 0.0001395 | ADRA1B(+9.776kb)               |
| rs4810869  | 20 | 47350278  | 0.000254  | 0.06625  | 0.0002687 | PREX1(0)                       |
| rs3005518  | 6  | 74529038  | 0.0002544 | 0.06533  | 0.0002654 | CD109(0)                       |
| rs750827   | 6  | 74526293  | 0.0002544 | 0.06533  | 0.0002654 | CD109(0)                       |
| rs2101725  | 17 | 71026194  | 0.0002545 | -0.07711 | 0.0003759 | SLC39A11(0)                    |
| rs35317306 | 7  | 77861404  | 0.000255  | 0.03273  | 0.0002815 | MAGI2(0)                       |
| rs10819137 | 9  | 128966551 | 0.0002555 | 0.06456  | 0.0002104 | .                              |
| rs314201   | 6  | 69846181  | 0.0002555 | 0.03453  | 0.0002494 | BAI3(0)                        |
| rs4445258  | 8  | 119804704 | 0.0002558 | -0.04787 | 0.0004301 | .                              |
| rs450772   | 5  | 62576296  | 0.0002565 | 0.0364   | 0.0001468 | .                              |
| rs17288444 | 9  | 14686308  | 0.0002568 | -0.03582 | 0.0002906 | ZDHHC21(0)                     |
| rs4759282  | 12 | 54072435  | 0.0002568 | -0.03281 | 0.0002487 | ATP5G2(+1.923kb)               |
| rs7145422  | 14 | 68861465  | 0.0002574 | -0.04236 | 0.000186  | RAD51L1(0)                     |
| rs4365466  | 2  | 126833563 | 0.0002578 | 0.03747  | 0.0003033 | .                              |
| rs11215463 | 11 | 115155259 | 0.0002585 | 0.05097  | 0.0002839 | CADM1(0)                       |
| rs34625945 | 4  | 14527528  | 0.0002586 | 0.04848  | 0.0001974 | .                              |
| rs28535078 | 14 | 21145076  | 0.000259  | -0.04076 | 0.0002385 | RNASE4(-7.295kb) ANG(-7.259kb) |

|            |    |           |           |          |           |                                  |
|------------|----|-----------|-----------|----------|-----------|----------------------------------|
| rs7673369  | 4  | 136209918 | 0.0002594 | -0.03296 | 0.0002039 | .                                |
| rs2791443  | 9  | 18374849  | 0.0002595 | 0.03225  | 0.0003014 | .                                |
| rs1736930  | 6  | 29678718  | 0.0002599 | 0.03472  | 0.0002258 | HLA-F(-12.4kb)                   |
| rs12330703 | 3  | 27096518  | 0.0002601 | 0.03293  | 0.0002899 | .                                |
| rs9816128  | 3  | 142327107 | 0.0002604 | 0.04491  | 0.0002736 | PLS1(-15.24kb)                   |
| rs2118177  | 2  | 85890293  | 0.0002611 | -0.03504 | 0.0002163 | USP39(+13.89kb) SFTPB(0)         |
| rs11170646 | 12 | 54087253  | 0.0002638 | -0.0356  | 0.0002647 | CALCOCO1(-17.65kb) ATP5G2(+16.74 |
| rs10893795 | 11 | 127849857 | 0.0002643 | 0.03694  | 0.0003709 | .                                |
| rs1865246  | 8  | 142274632 | 0.0002643 | 0.03433  | 0.0002389 | .                                |
| rs62411749 | 4  | 14553773  | 0.0002644 | 0.04324  | 0.0002858 | .                                |
| rs62411750 | 4  | 14554100  | 0.0002644 | 0.04324  | 0.0002858 | .                                |
| rs10769697 | 11 | 6547407   | 0.0002647 | 0.03275  | 0.0003456 | C11orf47(+5.317kb)               |
| rs4792761  | 17 | 16563937  | 0.000265  | 0.0432   | 0.0003205 | ZNF624(+6.779kb)                 |
| rs13393192 | 2  | 11368666  | 0.0002652 | -0.03253 | 0.0002126 | ROCK2(0)                         |
| rs61184289 | 4  | 14575665  | 0.0002654 | 0.03952  | 0.0002894 | .                                |
| rs7109689  | 11 | 127855811 | 0.0002667 | 0.03295  | 0.0002506 | .                                |
| rs7188879  | 16 | 79807389  | 0.000267  | 0.07563  | 0.0002678 | .                                |
| rs28718800 | 3  | 172153005 | 0.0002673 | 0.103    | 0.0002662 | GHSR(-9.945kb)                   |
| rs9861745  | 3  | 172153676 | 0.0002673 | 0.103    | 0.0002662 | GHSR(-9.274kb)                   |
| rs17615756 | 1  | 194046863 | 0.0002676 | -0.05117 | 0.0003377 | .                                |
| rs16833758 | 3  | 122719543 | 0.0002677 | -0.07883 | 0.0002413 | SEMA5B(0)                        |
| rs2870632  | 20 | 54080740  | 0.0002682 | -0.03443 | 0.0003019 | .                                |
| rs1610593  | 6  | 29678520  | 0.0002685 | 0.03462  | 0.0002344 | HLA-F(-12.6kb)                   |
| rs34415214 | 16 | 69419394  | 0.0002686 | 0.06789  | 0.0001701 | TERF2(0)                         |
| rs1610745  | 6  | 29679189  | 0.0002688 | 0.03459  | 0.0002368 | HLA-F(-11.93kb)                  |
| rs9371342  | 6  | 154760264 | 0.0002692 | 0.0821   | 0.000276  | CNKSR3(0)                        |
| rs12447727 | 16 | 54200214  | 0.0002693 | 0.06788  | 0.0002923 | .                                |
| rs1437576  | 6  | 74536356  | 0.000271  | 0.06479  | 0.000282  | CD109(0)                         |
| rs1851185  | 2  | 212527729 | 0.0002717 | -0.03923 | 0.0002063 | ERBB4(0)                         |
| rs7140827  | 14 | 68955809  | 0.0002719 | -0.04304 | 0.0002121 | RAD51L1(0)                       |
| rs56109730 | 3  | 193465315 | 0.000272  | 0.04182  | 0.0003037 | .                                |
| rs7114336  | 11 | 127836167 | 0.0002721 | 0.03712  | 0.0003729 | .                                |
| rs7331470  | 13 | 45335607  | 0.0002723 | -0.0478  | 0.0001898 | .                                |
| rs9407902  | 9  | 18383380  | 0.0002726 | -0.03163 | 0.0002723 | .                                |
| rs6881883  | 5  | 72521622  | 0.0002733 | 0.03541  | 0.0002442 | .                                |
| rs6882248  | 5  | 72521854  | 0.0002733 | 0.03541  | 0.0002442 | .                                |
| rs6977987  | 7  | 67134789  | 0.0002733 | -0.05219 | 0.0002529 | .                                |
| rs13076273 | 3  | 197258037 | 0.0002737 | -0.03656 | 0.0003213 | BDH1(0)                          |
| rs6570424  | 6  | 141169707 | 0.0002741 | 0.0648   | 0.0002752 | .                                |
| rs8107642  | 19 | 12766370  | 0.0002742 | 0.03379  | 0.0003322 | MORG1(-11.26kb) MAN2B1(0) C19orf |
| rs4074586  | 11 | 21532867  | 0.0002743 | 0.03431  | 0.0002531 | NELL1(0)                         |
| rs10486375 | 7  | 19959535  | 0.0002747 | -0.1459  | 0.0002482 | .                                |
| rs6939037  | 6  | 29937971  | 0.0002748 | 0.05593  | 0.0001234 | HLA-A29.1(0) HCG9(-4.92kb)       |
| rs1627465  | 6  | 29682901  | 0.0002751 | 0.03455  | 0.0002421 | HLA-F(-8.215kb)                  |
| rs11221124 | 11 | 127857444 | 0.0002757 | 0.03669  | 0.0003815 | .                                |
| rs2581492  | 4  | 47992898  | 0.0002768 | -0.04354 | 0.0002888 | .                                |
| rs2661546  | 4  | 47992853  | 0.0002768 | -0.04354 | 0.0002888 | .                                |

|            |    |           |           |          |           |                                  |
|------------|----|-----------|-----------|----------|-----------|----------------------------------|
| rs3113875  | 4  | 47993090  | 0.0002768 | -0.04354 | 0.0002888 | .                                |
| rs3116796  | 6  | 29672743  | 0.0002771 | 0.03468  | 0.000238  | HLA-F(-18.37kb)                  |
| rs472477   | 5  | 152857519 | 0.0002772 | 0.091    | 0.0002562 | GRIA1(-12.56kb)                  |
| rs11654854 | 17 | 8554712   | 0.0002777 | 0.03405  | 0.0002236 | .                                |
| rs28587843 | 4  | 30758905  | 0.0002778 | 0.04363  | 0.0002897 | PCDH7(0)                         |
| rs34549668 | 1  | 204321764 | 0.0002788 | -0.03806 | 0.0001975 | PLEKHA6(0)                       |
| rs3133583  | 8  | 119830914 | 0.0002789 | -0.06753 | 0.000263  | .                                |
| rs942792   | 10 | 81078502  | 0.0002792 | 0.07021  | 0.0003639 | ZMIZ1(+2.229kb)                  |
| rs1611356  | 6  | 29679016  | 0.0002797 | 0.0345   | 0.0002452 | HLA-F(-12.1kb)                   |
| rs1611357  | 6  | 29679143  | 0.0002797 | 0.0345   | 0.0002452 | HLA-F(-11.97kb)                  |
| rs6098617  | 20 | 54076039  | 0.0002802 | -0.03425 | 0.0002875 | .                                |
| rs2894114  | 6  | 29672821  | 0.0002806 | 0.03463  | 0.0002422 | HLA-F(-18.3kb)                   |
| rs3116795  | 6  | 29672776  | 0.0002806 | 0.03463  | 0.0002422 | HLA-F(-18.34kb)                  |
| rs561360   | 11 | 127840238 | 0.0002811 | -0.04039 | 0.0002133 | .                                |
| rs3116794  | 6  | 29672926  | 0.0002815 | 0.03454  | 0.0002526 | HLA-F(-18.19kb)                  |
| rs11931577 | 4  | 78335569  | 0.0002816 | 0.04773  | 0.0003316 | .                                |
| rs4239135  | 17 | 16539005  | 0.0002818 | 0.04166  | 0.0003385 | ZNF624(0)                        |
| rs1611358  | 6  | 29679417  | 0.0002819 | 0.03453  | 0.0002452 | HLA-F(-11.7kb)                   |
| rs1611379  | 6  | 29680270  | 0.0002821 | 0.03448  | 0.0002482 | HLA-F(-10.85kb)                  |
| rs4356958  | 4  | 136176700 | 0.0002826 | -0.03259 | 0.0002172 | .                                |
| rs834367   | 6  | 19002293  | 0.0002837 | -0.03911 | 0.0004104 | .                                |
| rs1460686  | 4  | 136211250 | 0.0002838 | -0.03282 | 0.0002201 | .                                |
| rs9995651  | 4  | 90716177  | 0.0002839 | 0.08469  | 0.0002872 | SNCA(0)                          |
| rs10839575 | 11 | 6551635   | 0.0002843 | 0.03297  | 0.0003642 | C11orf47(+9.545kb)               |
| rs2394659  | 6  | 29672643  | 0.0002857 | 0.03457  | 0.0002478 | HLA-F(-18.47kb)                  |
| rs36004171 | 9  | 99176392  | 0.0002858 | 0.08359  | 0.000167  | ZNF367(0)                        |
| rs1629180  | 6  | 29682701  | 0.0002866 | 0.03443  | 0.0002533 | HLA-F(-8.415kb)                  |
| rs3129192  | 6  | 29682570  | 0.0002866 | 0.03443  | 0.0002533 | HLA-F(-8.546kb)                  |
| rs9258152  | 6  | 29682572  | 0.0002866 | 0.03443  | 0.0002533 | HLA-F(-8.544kb)                  |
| rs2253977  | 20 | 3939140   | 0.0002868 | 0.03558  | 0.0002967 | RNF24(0)                         |
| rs2313197  | 1  | 1299129   | 0.0002869 | -0.1245  | 0.0002738 | MXRA8(+5.214kb) DVL1(+14.64kb) A |
| rs62354284 | 5  | 20553165  | 0.0002876 | -0.1491  | 0.0002752 | .                                |
| rs13299657 | 9  | 99100100  | 0.0002886 | 0.08078  | 0.0001761 | SLC35D2(0)                       |
| rs1908418  | 1  | 80026704  | 0.0002891 | 0.04088  | 0.0002505 | .                                |
| rs11737308 | 4  | 153136602 | 0.0002896 | -0.04944 | 0.0002488 | .                                |
| rs12444460 | 16 | 53637054  | 0.0002898 | -0.07093 | 0.0002153 | RPGRIP1L(0)                      |
| rs34320254 | 4  | 90705606  | 0.0002905 | 0.08457  | 0.0002932 | SNCA(0)                          |
| rs1611359  | 6  | 29679431  | 0.0002906 | 0.0345   | 0.0002512 | HLA-F(-11.69kb)                  |
| rs1611360  | 6  | 29679434  | 0.0002906 | 0.0345   | 0.0002512 | HLA-F(-11.68kb)                  |
| rs1611361  | 6  | 29679466  | 0.0002906 | 0.0345   | 0.0002512 | HLA-F(-11.65kb)                  |
| rs1611363  | 6  | 29679551  | 0.0002906 | 0.0345   | 0.0002512 | HLA-F(-11.56kb)                  |
| rs426987   | 5  | 127613791 | 0.0002908 | -0.03648 | 0.000291  | FBN2(0)                          |
| rs9878482  | 3  | 10969663  | 0.0002909 | -0.04493 | 0.0003311 | SLC6A11(0)                       |
| rs59078959 | 20 | 47344582  | 0.0002916 | 0.06535  | 0.0003069 | PREX1(0)                         |
| rs9682663  | 3  | 172128818 | 0.0002919 | 0.1052   | 0.0002839 | FNDC3B(+10.33kb)                 |
| rs6551393  | 3  | 89163468  | 0.0002921 | 0.03921  | 0.0003407 | EPHA3(0)                         |
| rs1425591  | 8  | 57559720  | 0.0002931 | 0.0471   | 0.0002204 | .                                |

|            |    |           |           |          |           |                                   |
|------------|----|-----------|-----------|----------|-----------|-----------------------------------|
| rs4309822  | 4  | 153136083 | 0.0002932 | -0.05193 | 0.000252  | .                                 |
| rs2262649  | 11 | 6517453   | 0.0002944 | 0.0331   | 0.0003599 | FXC1(+11.54kb) C11orf47(-1.077kb) |
| rs34322165 | 4  | 14542891  | 0.0002946 | 0.04286  | 0.0003218 | .                                 |
| rs1611370  | 6  | 29679981  | 0.000295  | 0.03438  | 0.0002591 | HLA-F(-11.13kb)                   |
| rs10839574 | 11 | 6551470   | 0.0002954 | 0.03252  | 0.000377  | C11orf47(+9.38kb)                 |
| rs1610595  | 6  | 29679170  | 0.0002961 | 0.03436  | 0.0002597 | HLA-F(-11.95kb)                   |
| rs6069297  | 20 | 54084340  | 0.0002965 | -0.03388 | 0.0003646 | .                                 |
| rs3852929  | 20 | 54085557  | 0.0002967 | -0.03418 | 0.0003728 | .                                 |
| rs2734989  | 6  | 29812643  | 0.0002975 | 0.04269  | 0.0001863 | HLA-G(+13.74kb)                   |
| rs12957107 | 18 | 63856875  | 0.0002979 | 0.06627  | 0.0002963 | .                                 |
| rs2268231  | 21 | 32732912  | 0.0002979 | 0.03963  | 0.0002708 | TIAM1(0)                          |
| rs7779671  | 7  | 128742221 | 0.0002981 | 0.03319  | 0.0004629 | .                                 |
| rs11629118 | 14 | 21145055  | 0.0002983 | -0.04047 | 0.0002633 | RNASE4(-7.316kb) ANG(-7.28kb)     |
| rs3116790  | 6  | 29673548  | 0.0002995 | 0.08354  | 0.0002582 | HLA-F(-17.57kb)                   |
| rs61791292 | 1  | 104756436 | 0.0002995 | 0.03447  | 0.0001791 | .                                 |
| rs12088719 | 1  | 47044875  | 0.0002997 | 0.1426   | 0.0003023 | MKNK1(0)                          |
| rs2524271  | 6  | 29682617  | 0.0002998 | 0.03448  | 0.0002612 | HLA-F(-8.499kb)                   |
| rs17038710 | 3  | 13892543  | 0.0003001 | 0.03993  | 0.0003357 | WNT7A(0)                          |
| rs4809722  | 20 | 47354008  | 0.0003002 | 0.06577  | 0.0003167 | PREX1(0)                          |
| rs4809723  | 20 | 47354520  | 0.0003002 | 0.06577  | 0.0003167 | PREX1(0)                          |
| rs2555160  | 11 | 6516458   | 0.0003016 | -0.03374 | 0.0002673 | FXC1(+10.55kb) C11orf47(-2.072kb) |
| rs17115366 | 1  | 57672426  | 0.0003018 | -0.05908 | 0.000273  | DAB1(0)                           |
| rs535111   | 11 | 65485337  | 0.0003024 | -0.03142 | 0.0002458 | RNASEH2C(0) KAT5(0)               |
| rs1859817  | 7  | 25458694  | 0.0003025 | -0.03859 | 0.0004079 | .                                 |
| rs7139799  | 13 | 88759797  | 0.0003029 | -0.04365 | 0.0002195 | .                                 |
| rs3845441  | 1  | 181655752 | 0.0003032 | -0.04367 | 0.0002571 | CACNA1E(0)                        |
| rs58283464 | 2  | 195794933 | 0.0003043 | -0.0517  | 0.0002718 | .                                 |
| rs4758426  | 11 | 6544649   | 0.0003045 | 0.03302  | 0.0003828 | C11orf47(+2.559kb)                |
| rs1808853  | 4  | 47957360  | 0.0003047 | -0.04069 | 0.0003066 | CNGA1(+2.634kb)                   |
| rs1893169  | 11 | 127833801 | 0.0003049 | 0.03675  | 0.0004199 | .                                 |
| rs10983338 | 9  | 119518570 | 0.000305  | 0.04259  | 0.0003583 | ASTN2(0)                          |
| rs16987218 | 2  | 20098208  | 0.0003052 | 0.06699  | 0.0002057 | WDR35(-11.82kb) TTC32(0)          |
| rs2998680  | 9  | 81102028  | 0.0003053 | 0.04423  | 0.0003356 | .                                 |
| rs6440095  | 3  | 142325748 | 0.0003053 | 0.04423  | 0.0003243 | PLS1(-16.59kb)                    |
| rs7633021  | 3  | 142327824 | 0.0003053 | 0.04423  | 0.0003243 | PLS1(-14.52kb)                    |
| rs9816275  | 3  | 142327240 | 0.0003053 | 0.04423  | 0.0003243 | PLS1(-15.1kb)                     |
| rs9826463  | 3  | 142328919 | 0.0003053 | 0.04119  | 0.0003243 | PLS1(-13.42kb)                    |
| rs17405926 | 1  | 204309134 | 0.0003054 | -0.03494 | 0.0002307 | PLEKHA6(0)                        |
| rs11221120 | 11 | 127845251 | 0.0003056 | 0.03671  | 0.0004311 | .                                 |
| rs6069298  | 20 | 54085193  | 0.0003057 | -0.0341  | 0.0003841 | .                                 |
| rs9393988  | 6  | 30016676  | 0.0003057 | -0.03598 | 0.0002681 | ZNRD1(-12.36kb) PPP1R11(-18.25kb) |
| rs7783295  | 7  | 47867908  | 0.0003059 | -0.03242 | 0.0002579 | PKD1L1(0) FLJ21075(+8.464kb)      |
| rs864417   | 2  | 183210447 | 0.0003064 | 0.0357   | 0.0003625 | PDE1A(0)                          |
| rs13297309 | 9  | 99111915  | 0.0003073 | -0.05342 | 0.0001771 | SLC35D2(0)                        |
| rs2714617  | 7  | 67141935  | 0.0003073 | 0.08807  | 0.0002816 | .                                 |
| rs8013026  | 14 | 68832090  | 0.0003075 | -0.04153 | 0.00022   | RAD51L1(0)                        |
| rs4763508  | 12 | 18790817  | 0.0003082 | 0.036    | 0.0003179 | PIK3C2G(0)                        |

|            |    |           |           |          |           |                                  |
|------------|----|-----------|-----------|----------|-----------|----------------------------------|
| rs12954131 | 18 | 63868238  | 0.0003091 | 0.06587  | 0.0003107 | .                                |
| rs960897   | 18 | 63866566  | 0.0003091 | 0.06587  | 0.0003107 | .                                |
| rs17020098 | 2  | 81460772  | 0.0003092 | 0.05127  | 0.0003624 | .                                |
| rs10769696 | 11 | 6547114   | 0.0003101 | 0.03234  | 0.0004052 | C11orf47(+5.024kb)               |
| rs62457140 | 7  | 67134486  | 0.0003109 | -0.05177 | 0.0002847 | .                                |
| rs10010440 | 4  | 138087831 | 0.0003113 | -0.1076  | 0.000216  | .                                |
| rs9919575  | 11 | 75963003  | 0.0003114 | -0.04166 | 0.0002934 | .                                |
| rs12338948 | 9  | 29638538  | 0.000312  | 0.03638  | 0.0002184 | .                                |
| rs307356   | 1  | 1282270   | 0.0003121 | -0.1206  | 0.0002894 | TAS1R3(+12.43kb) MXRA8(-5.8kb) G |
| rs7866245  | 9  | 29641695  | 0.0003124 | 0.03687  | 0.0002101 | .                                |
| rs12969359 | 18 | 63869813  | 0.0003127 | 0.06584  | 0.0003129 | .                                |
| rs9966786  | 18 | 50493874  | 0.0003133 | 0.04668  | 0.0003445 | DCC(0)                           |
| rs13128848 | 4  | 14540826  | 0.0003139 | 0.04267  | 0.0003428 | .                                |
| rs8062851  | 16 | 26518490  | 0.000314  | 0.03257  | 0.0003777 | .                                |
| rs17151987 | 7  | 127950414 | 0.0003145 | 0.06579  | 0.0003179 | RBM28(-0.021kb)                  |
| rs850733   | 17 | 42451305  | 0.0003147 | 0.03362  | 0.0002324 | ITGA2B(0)                        |
| rs4476524  | 3  | 197244019 | 0.0003159 | -0.03302 | 0.0005604 | BDH1(0)                          |
| rs332417   | 3  | 124253137 | 0.0003162 | -0.03512 | 0.00032   | KALRN(0)                         |
| rs7647497  | 3  | 142322333 | 0.0003163 | 0.04407  | 0.0003375 | .                                |
| rs3206843  | 2  | 11318457  | 0.0003166 | -0.03245 | 0.0002439 | ROCK2(-3.32kb) PQLC3(0)          |
| rs4803758  | 19 | 45327423  | 0.0003169 | -0.03429 | 0.0004035 | BCAM(+2.745kb)                   |
| rs9860797  | 3  | 89164099  | 0.0003174 | 0.03887  | 0.0003635 | EPHA3(0)                         |
| rs7616998  | 3  | 197241877 | 0.0003175 | -0.03866 | 0.000576  | BDH1(0)                          |
| rs4723739  | 7  | 38270723  | 0.0003176 | -0.03341 | 0.0004467 | STARD3NL(+0.453kb)               |
| rs28372928 | 16 | 69373851  | 0.0003178 | 0.06094  | 0.0002243 | VPS4A(+14.9kb) TMED6(-3.308kb) T |
| rs10120611 | 9  | 119523145 | 0.0003184 | 0.087    | 0.0004404 | ASTN2(0)                         |
| rs11967960 | 6  | 164771942 | 0.0003184 | 0.1172   | 0.0004012 | .                                |
| rs12445128 | 16 | 53686308  | 0.000319  | -0.07056 | 0.0002324 | RPGRIP1L(0)                      |
| rs10488043 | 7  | 101649622 | 0.0003193 | 0.04303  | 0.0003954 | CUX1(0)                          |
| rs7630371  | 3  | 89162860  | 0.0003195 | 0.03903  | 0.0003722 | EPHA3(0)                         |
| rs41306318 | 10 | 28289092  | 0.0003198 | 0.1595   | 0.000323  | ARMC4(+1.115kb)                  |
| rs4258637  | 16 | 64687907  | 0.0003203 | 0.03346  | 0.0002316 | .                                |
| rs13238544 | 7  | 131021956 | 0.0003207 | 0.03871  | 0.0003849 | MKLN1(0)                         |
| rs10961655 | 9  | 14676174  | 0.000321  | -0.0326  | 0.0003727 | ZDHC21(0)                        |
| rs1603129  | 1  | 80023742  | 0.0003212 | 0.04058  | 0.0002794 | .                                |
| rs1032418  | 6  | 52834957  | 0.0003213 | 0.03251  | 0.0003179 | GSTA4(-7.793kb)                  |
| rs1587077  | 1  | 80024948  | 0.0003218 | 0.0405   | 0.0002807 | .                                |
| rs35562412 | 7  | 77861353  | 0.0003221 | 0.03257  | 0.0003392 | MAGI2(0)                         |
| rs2602751  | 2  | 3255054   | 0.0003227 | 0.1219   | 0.0002475 | TSSC1(0)                         |
| rs2716936  | 17 | 5489481   | 0.0003227 | 0.0323   | 0.0003304 | NLRP1(+1.649kb)                  |
| rs4888673  | 16 | 77783703  | 0.0003232 | 0.05679  | 0.000331  | NUDT7(+7.549kb)                  |
| rs4888675  | 16 | 77783757  | 0.0003232 | 0.05679  | 0.000331  | NUDT7(+7.603kb)                  |
| rs12052439 | 2  | 81417142  | 0.0003233 | 0.04918  | 0.0005715 | .                                |
| rs1610749  | 6  | 29681357  | 0.0003238 | 0.03453  | 0.0002764 | HLA-F(-9.759kb)                  |
| rs17531026 | 4  | 114439090 | 0.0003239 | -0.03687 | 0.0003389 | CAMK2D(0)                        |
| rs2066267  | 6  | 22255514  | 0.0003243 | 0.03928  | 0.000446  | .                                |
| rs2523948  | 6  | 29941857  | 0.0003243 | 0.0405   | 0.0002875 | HLA-A29.1(0) HCG9(-1.034kb)      |

|            |    |           |           |          |           |                                  |
|------------|----|-----------|-----------|----------|-----------|----------------------------------|
| rs2833389  | 21 | 32737319  | 0.0003243 | 0.0328   | 0.0002996 | TIAM1(0)                         |
| rs996822   | 20 | 5250423   | 0.0003246 | 0.03584  | 0.0002822 | .                                |
| rs2015560  | 21 | 26028890  | 0.0003257 | 0.0598   | 0.0004437 | .                                |
| rs12051767 | 17 | 7543894   | 0.0003261 | 0.06579  | 0.0003972 | SHBG(+7.224kb) SAT2(+12.73kb) AT |
| rs2217041  | 11 | 127876931 | 0.0003262 | 0.03336  | 0.0002946 | .                                |
| rs10222080 | 21 | 32731671  | 0.0003266 | 0.03934  | 0.0002987 | TIAM1(0)                         |
| rs9976871  | 21 | 32731983  | 0.0003266 | 0.03934  | 0.0002987 | TIAM1(0)                         |
| rs1317758  | 12 | 116843886 | 0.0003268 | -0.03219 | 0.0003093 | .                                |
| rs2341674  | 8  | 29198256  | 0.0003274 | 0.04415  | 0.0003882 | DUSP4(0)                         |
| rs12955663 | 18 | 63907679  | 0.0003283 | 0.06908  | 0.0003113 | .                                |
| rs12956627 | 18 | 63907596  | 0.0003283 | 0.06908  | 0.0003113 | .                                |
| rs12967404 | 18 | 63909382  | 0.0003283 | 0.06908  | 0.0003113 | .                                |
| rs12968160 | 18 | 63909736  | 0.0003283 | 0.06908  | 0.0003113 | .                                |
| rs12968584 | 18 | 63909974  | 0.0003283 | 0.06908  | 0.0003113 | .                                |
| rs12968674 | 18 | 63909546  | 0.0003283 | 0.06908  | 0.0003113 | .                                |
| rs779451   | 6  | 69966532  | 0.0003283 | 0.04084  | 0.0003342 | BAI3(0)                          |
| rs871331   | 3  | 193474671 | 0.0003283 | 0.05713  | 0.0003655 | .                                |
| rs1611372  | 6  | 29680072  | 0.0003285 | 0.03419  | 0.0002846 | HLA-F(-11.04kb)                  |
| rs1611373  | 6  | 29680084  | 0.0003285 | 0.03419  | 0.0002846 | HLA-F(-11.03kb)                  |
| rs1600836  | 9  | 29630296  | 0.0003286 | 0.03675  | 0.0002173 | .                                |
| rs9367924  | 6  | 16669367  | 0.0003289 | -0.0456  | 0.0003675 | ATXN1(0)                         |
| rs1437578  | 6  | 74541672  | 0.0003292 | 0.06319  | 0.0003404 | CD109(+3.631kb)                  |
| rs3012541  | 6  | 74540597  | 0.0003294 | 0.06416  | 0.0003348 | CD109(+2.556kb)                  |
| rs6887111  | 5  | 72522437  | 0.0003301 | 0.03505  | 0.0002909 | .                                |
| rs2103659  | 20 | 3982572   | 0.0003302 | 0.03333  | 0.0003499 | RNF24(0)                         |
| rs55689333 | 13 | 19509358  | 0.0003302 | 0.03652  | 0.000235  | .                                |
| rs12969696 | 18 | 63870064  | 0.0003307 | 0.06559  | 0.0003296 | .                                |
| rs3116793  | 6  | 29673186  | 0.0003313 | 0.03423  | 0.0002849 | HLA-F(-17.93kb)                  |
| rs2186877  | 11 | 127862843 | 0.0003315 | 0.03317  | 0.0003021 | .                                |
| rs60335943 | 3  | 122726885 | 0.0003315 | -0.08548 | 0.0003099 | SEMA5B(0)                        |
| rs6463451  | 7  | 47869751  | 0.0003316 | -0.03213 | 0.0002908 | PKD1L1(0) FLJ21075(+10.31kb)     |
| rs20493    | 11 | 119957516 | 0.0003319 | 0.04815  | 0.000506  | .                                |
| rs34927823 | 6  | 29545494  | 0.0003324 | -0.04544 | 0.0002742 | UBD(+17.79kb) OR2H2(-10.19kb)    |
| rs34502205 | 9  | 99097590  | 0.000333  | -0.04874 | 0.0002027 | SLC35D2(0)                       |
| rs4367561  | 8  | 51557349  | 0.000333  | -0.04874 | 0.0002631 | SNTG1(0)                         |
| rs4607637  | 8  | 51557345  | 0.000333  | 0.08174  | 0.0002631 | SNTG1(0)                         |
| rs9567473  | 13 | 45341349  | 0.0003332 | -0.04776 | 0.0002302 | .                                |
| rs3116788  | 6  | 29674197  | 0.0003333 | 0.03422  | 0.0002726 | HLA-F(-16.92kb)                  |
| rs3116789  | 6  | 29674175  | 0.0003333 | 0.03422  | 0.0002726 | HLA-F(-16.94kb)                  |
| rs12665243 | 6  | 77307256  | 0.0003334 | 0.04659  | 0.0003659 | .                                |
| rs17150472 | 7  | 8563985   | 0.0003334 | 0.03707  | 0.0003534 | NXPH1(0)                         |
| rs7126137  | 11 | 103833878 | 0.0003337 | 0.1328   | 0.0003056 | PDGFD(0)                         |
| rs11156885 | 14 | 35950863  | 0.000334  | 0.07913  | 0.0003215 | .                                |
| rs55689103 | 7  | 103234202 | 0.000334  | -0.1593  | 0.0003125 | RELN(0)                          |
| rs58415045 | 6  | 77309805  | 0.0003343 | 0.04241  | 0.0003688 | .                                |
| rs62072852 | 17 | 16518556  | 0.0003343 | 0.04678  | 0.000384  | ZNF624(-5.491kb)                 |
| rs12467002 | 2  | 195824908 | 0.0003353 | -0.0517  | 0.000296  | .                                |



|            |    |           |           |          |           |                                  |
|------------|----|-----------|-----------|----------|-----------|----------------------------------|
| rs13024234 | 2  | 195827212 | 0.0003353 | -0.0517  | 0.000296  | .                                |
| rs834366   | 6  | 19002681  | 0.0003362 | -0.03908 | 0.0004843 | .                                |
| rs8027497  | 15 | 25093106  | 0.0003363 | -0.05362 | 0.0003041 | SNRPN(0)                         |
| rs1610585  | 6  | 29675676  | 0.0003364 | 0.03549  | 0.000285  | HLA-F(-15.44kb)                  |
| rs2602747  | 2  | 3258591   | 0.0003365 | 0.03205  | 0.0002653 | TSSC1(0)                         |
| rs7012427  | 8  | 119807622 | 0.0003369 | -0.04712 | 0.0005648 | .                                |
| rs11119148 | 1  | 209059239 | 0.0003375 | -0.07266 | 0.0002991 | .                                |
| rs245443   | 5  | 127663392 | 0.0003378 | -0.05169 | 0.0002432 | FBN2(0)                          |
| rs183108   | 6  | 54310798  | 0.0003388 | -0.06586 | 0.0002834 | .                                |
| rs189654   | 6  | 54311916  | 0.0003388 | -0.06586 | 0.0002834 | .                                |
| rs243797   | 6  | 54311148  | 0.0003388 | -0.06586 | 0.0002834 | .                                |
| rs874841   | 6  | 148937464 | 0.000339  | -0.03467 | 0.0003072 | .                                |
| rs7218241  | 17 | 16550817  | 0.0003391 | 0.0421   | 0.0003986 | ZNF624(0)                        |
| rs1449506  | 13 | 42783966  | 0.0003398 | 0.04743  | 0.0003548 | DGKH(0)                          |
| rs1610594  | 6  | 29679047  | 0.0003401 | 0.03204  | 0.0003031 | HLA-F(-12.07kb)                  |
| rs2602743  | 2  | 3262891   | 0.0003401 | 0.034    | 0.0002661 | TSSC1(0)                         |
| rs199916   | 1  | 181635954 | 0.0003405 | -0.04373 | 0.0002982 | CACNA1E(0)                       |
| rs10757059 | 9  | 19446663  | 0.0003407 | -0.0318  | 0.0004366 | ASAH3L(0)                        |
| rs62197539 | 2  | 195791452 | 0.0003418 | -0.06294 | 0.0003064 | .                                |
| rs10440295 | 4  | 14573940  | 0.000342  | 0.03886  | 0.0003808 | .                                |
| rs4862298  | 4  | 184988203 | 0.0003422 | 0.03303  | 0.0003705 | .                                |
| rs17150445 | 7  | 24926866  | 0.0003432 | 0.03214  | 0.0002879 | OSBPL3(0)                        |
| rs2300217  | 20 | 3938575   | 0.0003432 | 0.03602  | 0.000349  | RNF24(0)                         |
| rs2444595  | 2  | 3279218   | 0.0003432 | -0.05667 | 0.0002647 | TSSC1(0)                         |
| rs7930651  | 11 | 127822688 | 0.0003434 | 0.03719  | 0.0004692 | .                                |
| rs6947216  | 7  | 47865973  | 0.0003435 | -0.03183 | 0.0002998 | PKD1L1(0) FLJ21075(+6.529kb)     |
| rs1610584  | 6  | 29675615  | 0.0003437 | 0.0464   | 0.0002975 | HLA-F(-15.5kb)                   |
| rs1610586  | 6  | 29676316  | 0.0003437 | 0.03407  | 0.0002975 | HLA-F(-14.8kb)                   |
| rs35166096 | 18 | 50498354  | 0.0003437 | 0.03407  | 0.0003762 | DCC(0)                           |
| rs930586   | 15 | 22833118  | 0.0003445 | 0.04433  | 0.0002981 | TUBGCP5(-0.276kb)                |
| rs9925573  | 16 | 64688573  | 0.0003446 | 0.03318  | 0.000247  | .                                |
| rs62197540 | 2  | 195794415 | 0.0003454 | -0.06292 | 0.0003082 | .                                |
| rs61766391 | 1  | 80026481  | 0.0003464 | 0.04034  | 0.0003038 | .                                |
| rs7775778  | 6  | 19019537  | 0.0003468 | -0.03895 | 0.0004867 | .                                |
| rs1615739  | 2  | 17735861  | 0.0003473 | -0.07002 | 0.0002387 | VSNL1(0)                         |
| rs8080801  | 17 | 71023489  | 0.0003473 | -0.03588 | 0.0004793 | SLC39A11(0)                      |
| rs4867899  | 5  | 169317612 | 0.0003477 | -0.03252 | 0.0004104 | LOC100131897(0) DOCK2(0)         |
| rs12968364 | 18 | 63858842  | 0.0003489 | 0.03315  | 0.0003496 | .                                |
| rs56255822 | 16 | 64694199  | 0.0003489 | 0.06532  | 0.0002543 | .                                |
| rs59633516 | 12 | 127985024 | 0.0003503 | -0.09404 | 0.0003427 | .                                |
| rs7975643  | 12 | 116842717 | 0.0003506 | -0.03178 | 0.0003375 | .                                |
| rs11757453 | 6  | 123955967 | 0.0003507 | -0.08019 | 0.0002887 | TRDN(0)                          |
| rs11604149 | 11 | 6519642   | 0.0003508 | 0.03241  | 0.0004308 | FXC1(+13.73kb) C11orf47(0) ARFIP |
| rs874110   | 4  | 114423031 | 0.0003508 | -0.03745 | 0.0003961 | CAMK2D(0)                        |
| rs7847579  | 9  | 29640181  | 0.0003511 | 0.03591  | 0.000243  | .                                |
| rs1109492  | 6  | 74543726  | 0.0003525 | 0.06287  | 0.0003651 | CD109(+5.685kb)                  |
| rs3012543  | 6  | 74544558  | 0.0003525 | 0.06287  | 0.0003651 | CD109(+6.517kb)                  |

|            |    |           |           |          |           |                                   |
|------------|----|-----------|-----------|----------|-----------|-----------------------------------|
| rs6881782  | 5  | 59666601  | 0.0003527 | 0.1246   | 0.0003664 | .                                 |
| rs3748419  | 18 | 10707680  | 0.0003531 | 0.03684  | 0.0003243 | FAM38B(+9.866kb)                  |
| rs1644454  | 5  | 160744991 | 0.0003542 | -0.03755 | 0.0004338 | GABRB2(0)                         |
| rs11040899 | 11 | 6520015   | 0.0003543 | 0.03238  | 0.0004355 | FXC1(+14.1kb) C11orf47(0) ARFIP2  |
| rs1866995  | 4  | 90731709  | 0.0003545 | 0.0823   | 0.0003564 | SNCA(0)                           |
| rs12470801 | 2  | 183020486 | 0.0003546 | 0.033    | 0.000416  | PDE1A(0)                          |
| rs9838527  | 3  | 89189667  | 0.0003547 | 0.03824  | 0.0004181 | EPHA3(0)                          |
| rs36193836 | 2  | 195807025 | 0.0003548 | -0.05119 | 0.0003172 | .                                 |
| rs61876822 | 11 | 6516117   | 0.0003552 | -0.03417 | 0.0003121 | FXC1(+10.21kb) C11orf47(-2.413kb) |
| rs9988854  | 11 | 75961957  | 0.0003555 | -0.04186 | 0.0003315 | .                                 |
| rs6467170  | 7  | 127945168 | 0.0003557 | 0.06583  | 0.0003555 | RBM28(-5.267kb)                   |
| rs1233390  | 6  | 29551861  | 0.000356  | -0.04483 | 0.0003253 | OR2H2(-3.821kb) GABBR1(-18.14kb)  |
| rs8015516  | 14 | 68832814  | 0.0003564 | -0.04105 | 0.0002589 | RAD51L1(0)                        |
| rs10793145 | 11 | 75964099  | 0.0003566 | -0.0414  | 0.0003443 | .                                 |
| rs2694085  | 2  | 3280746   | 0.0003567 | 0.03201  | 0.0002775 | TSSC1(0)                          |
| rs8134794  | 21 | 32733739  | 0.0003571 | 0.03901  | 0.0003296 | TIAM1(0)                          |
| rs2572098  | 6  | 99538132  | 0.0003575 | -0.0349  | 0.0004422 | .                                 |
| rs7522769  | 1  | 204292684 | 0.0003575 | -0.05051 | 0.0002552 | PLEKHA6(0)                        |
| rs5006661  | 4  | 136142498 | 0.000359  | -0.03307 | 0.0002644 | .                                 |
| rs56327760 | 12 | 16960329  | 0.0003592 | 0.03543  | 0.0005044 | .                                 |
| rs9295826  | 6  | 29970927  | 0.0003592 | -0.03579 | 0.0003066 | HLA-A29.1(0)                      |
| rs2194406  | 2  | 53544697  | 0.0003593 | -0.03256 | 0.0002659 | .                                 |
| rs12617844 | 2  | 183026067 | 0.0003594 | 0.0463   | 0.0004561 | PDE1A(0)                          |
| rs9962115  | 18 | 50498974  | 0.0003594 | 0.03261  | 0.0003917 | DCC(0)                            |
| rs17773587 | 16 | 77772414  | 0.0003596 | 0.05612  | 0.0003808 | NUDT7(0)                          |
| rs346430   | 5  | 62589024  | 0.0003596 | 0.03522  | 0.000198  | .                                 |
| rs1033297  | 2  | 17768612  | 0.0003597 | -0.07311 | 0.000249  | VSNL1(0)                          |
| rs10863728 | 1  | 209056568 | 0.0003597 | -0.03684 | 0.0003279 | .                                 |
| rs10737357 | 1  | 31888836  | 0.0003598 | -0.03244 | 0.0004865 | SERINC2(0)                        |
| rs3862890  | 1  | 31889220  | 0.0003598 | -0.03244 | 0.0004865 | SERINC2(0)                        |
| rs2694083  | 2  | 3279353   | 0.0003599 | 0.03199  | 0.00028   | TSSC1(0)                          |
| rs7639401  | 3  | 89165250  | 0.0003599 | 0.03597  | 0.0003297 | EPHA3(0)                          |
| rs729748   | 14 | 24136587  | 0.0003609 | 0.04355  | 0.0003933 | .                                 |
| rs11736343 | 4  | 41170014  | 0.0003611 | 0.04068  | 0.0002211 | APBB2(0)                          |
| rs6961875  | 7  | 131109596 | 0.0003614 | 0.03786  | 0.0004624 | MKLN1(0)                          |
| rs2219368  | 2  | 81441729  | 0.0003616 | 0.03328  | 0.0006246 | .                                 |
| rs28771688 | 15 | 60624520  | 0.000362  | -0.03242 | 0.000439  | ANXA2(-14.83kb)                   |
| rs2694084  | 2  | 3280408   | 0.0003622 | 0.03297  | 0.0002853 | TSSC1(0)                          |
| rs9933415  | 16 | 64681461  | 0.0003622 | 0.03199  | 0.0002658 | .                                 |
| rs13398408 | 2  | 62987735  | 0.0003631 | 0.04045  | 0.0004214 | EHBP1(0)                          |
| rs2394660  | 6  | 29672686  | 0.0003639 | 0.03395  | 0.0003206 | HLA-F(-18.43kb)                   |
| rs183109   | 6  | 54307080  | 0.0003641 | -0.06571 | 0.0003043 | .                                 |
| rs4733846  | 8  | 129209258 | 0.0003644 | -0.05596 | 0.0003398 | .                                 |
| rs12480683 | 20 | 3868752   | 0.0003646 | 0.03671  | 0.0002799 | VISA(+11.99kb) PANK2(-0.733kb)    |
| rs12475637 | 2  | 183240754 | 0.0003648 | 0.03513  | 0.0005362 | PDE1A(0)                          |
| rs1233389  | 6  | 29552483  | 0.000365  | -0.04532 | 0.0003168 | OR2H2(-3.199kb) GABBR1(-17.52kb)  |
| rs3101541  | 8  | 107591544 | 0.0003654 | -0.03273 | 0.0002591 | OXR1(0)                           |

|            |    |           |           |          |           |                                  |
|------------|----|-----------|-----------|----------|-----------|----------------------------------|
| rs1317757  | 12 | 116843507 | 0.0003655 | -0.03164 | 0.0003555 | .                                |
| rs36132191 | 2  | 195821508 | 0.0003655 | -0.05232 | 0.0003229 | .                                |
| rs1414194  | 21 | 32735622  | 0.0003665 | 0.03881  | 0.0003413 | TIAM1(0)                         |
| rs10969306 | 9  | 29642453  | 0.0003668 | -0.03305 | 0.0002463 | .                                |
| rs5006665  | 4  | 136142755 | 0.0003668 | 0.03649  | 0.0002699 | .                                |
| rs2948519  | 17 | 25905359  | 0.000367  | 0.03231  | 0.0002432 | KSR1(0)                          |
| rs6037702  | 20 | 3936392   | 0.0003683 | 0.03578  | 0.0003763 | RNF24(0)                         |
| rs1193182  | 1  | 7537500   | 0.0003694 | 0.03266  | 0.0003233 | CAMTA1(0)                        |
| rs1015172  | 15 | 22839971  | 0.0003695 | -0.031   | 0.0003284 | TUBGCP5(0)                       |
| rs1928307  | 1  | 104746115 | 0.0003695 | 0.04361  | 0.0003803 | .                                |
| rs13111112 | 4  | 41184950  | 0.0003709 | 0.04006  | 0.000235  | APBB2(0)                         |
| rs4945053  | 11 | 75962372  | 0.000371  | -0.04137 | 0.0003544 | .                                |
| rs10910981 | 1  | 181661226 | 0.0003711 | -0.04302 | 0.0003131 | CACNA1E(0)                       |
| rs11894251 | 2  | 86643733  | 0.0003713 | 0.03516  | 0.0003493 | .                                |
| rs10893797 | 11 | 127852521 | 0.0003715 | 0.03236  | 0.0003489 | .                                |
| rs11082961 | 18 | 50526038  | 0.0003717 | 0.04673  | 0.0003814 | DCC(0)                           |
| rs3852927  | 20 | 54084699  | 0.0003718 | -0.03339 | 0.0004654 | .                                |
| rs3852928  | 20 | 54084834  | 0.0003718 | -0.03339 | 0.0004654 | .                                |
| rs2016337  | 11 | 78771634  | 0.0003719 | 0.03164  | 0.0004415 | ODZ4(0)                          |
| rs6098616  | 20 | 54074666  | 0.0003721 | -0.03401 | 0.0004002 | .                                |
| rs1869417  | 2  | 3249933   | 0.0003722 | 0.03181  | 0.000303  | TSSC1(0)                         |
| rs701655   | 6  | 69942506  | 0.0003725 | 0.05657  | 0.0004168 | BAI3(0)                          |
| rs10254963 | 7  | 128742649 | 0.0003727 | 0.03322  | 0.0005733 | .                                |
| rs28870083 | 15 | 60624346  | 0.0003734 | -0.03232 | 0.0004521 | ANXA2(-15kb)                     |
| rs12681724 | 8  | 139952110 | 0.0003737 | 0.05979  | 0.0003532 | .                                |
| rs12675341 | 8  | 139951982 | 0.0003747 | 0.05975  | 0.0003558 | .                                |
| rs34295116 | 16 | 69395212  | 0.0003751 | 0.06052  | 0.0002712 | TMED6(+9.523kb) TERF2(0) NIP7(+1 |
| rs13283860 | 9  | 99173552  | 0.0003753 | 0.08346  | 0.0002162 | ZNF367(0)                        |
| rs3094726  | 6  | 29673221  | 0.0003758 | 0.03406  | 0.0003307 | HLA-F(-17.89kb)                  |
| rs3116791  | 6  | 29673245  | 0.0003758 | 0.03406  | 0.0003307 | HLA-F(-17.87kb)                  |
| rs3116792  | 6  | 29673241  | 0.0003758 | 0.03406  | 0.0003307 | HLA-F(-17.88kb)                  |
| rs11675803 | 2  | 183250816 | 0.0003765 | 0.03556  | 0.000588  | PDE1A(0)                         |
| rs2344933  | 11 | 6518730   | 0.0003766 | -0.03346 | 0.0003361 | FXC1(+12.82kb) C11orf47(0) ARFIP |
| rs10468229 | 16 | 9907660   | 0.0003768 | -0.03685 | 0.0003433 | GRIN2A(0)                        |
| rs2319875  | 14 | 22179518  | 0.0003771 | -0.04688 | 0.000408  | .                                |
| rs10793144 | 11 | 75964083  | 0.0003774 | -0.04586 | 0.0003642 | .                                |
| rs2673432  | 10 | 79479119  | 0.0003774 | -0.04096 | 0.0004165 | .                                |
| rs57836876 | 2  | 86693217  | 0.0003778 | 0.04383  | 0.0003871 | JMJD1A(0)                        |
| rs4576907  | 12 | 68842125  | 0.0003779 | 0.03941  | 0.0004994 | .                                |
| rs9301934  | 13 | 94739859  | 0.0003779 | 0.05021  | 0.0004166 | GPC6(0)                          |
| rs1908715  | 5  | 7119293   | 0.000378  | -0.03826 | 0.0003102 | .                                |
| rs3742281  | 13 | 103349949 | 0.0003788 | 0.03148  | 0.0004579 | TPP2(+18.43kb) C13orf39(+3.095kb |
| rs3213758  | 16 | 53639438  | 0.000379  | -0.06878 | 0.0002742 | RPGRIP1L(0)                      |
| rs11657060 | 17 | 8553598   | 0.0003791 | 0.03285  | 0.0003305 | MYH10(+19.56kb)                  |
| rs8104226  | 19 | 12756456  | 0.0003814 | 0.03427  | 0.0004294 | ZNF791(+15.78kb) MAN2B1(-0.865kb |
| rs61360811 | 6  | 77293733  | 0.0003815 | 0.04671  | 0.0004305 | .                                |
| rs1437579  | 6  | 74542387  | 0.0003816 | 0.06222  | 0.0003994 | CD109(+4.346kb)                  |

|            |    |           |           |          |           |                                  |
|------------|----|-----------|-----------|----------|-----------|----------------------------------|
| rs5006666  | 4  | 136142799 | 0.0003818 | -0.03294 | 0.0002807 | .                                |
| rs4938195  | 11 | 115163665 | 0.0003819 | 0.04939  | 0.0003877 | CADM1(0)                         |
| rs10050896 | 5  | 54197787  | 0.0003821 | -0.03357 | 0.0003912 | .                                |
| rs12590319 | 14 | 68889011  | 0.0003821 | 0.1022   | 0.000538  | RAD51L1(0)                       |
| rs9364649  | 6  | 162727275 | 0.0003822 | -0.05508 | 0.0003522 | PARK2(0)                         |
| rs34104455 | 4  | 90651252  | 0.0003824 | -0.07619 | 0.0003883 | SNCA(0)                          |
| rs34342799 | 4  | 90653487  | 0.0003824 | 0.0816   | 0.0003883 | SNCA(0)                          |
| rs8074504  | 17 | 71023013  | 0.0003824 | 0.0816   | 0.0005338 | SLC39A11(0)                      |
| rs2694095  | 2  | 3254777   | 0.0003825 | 0.03177  | 0.000302  | TSSC1(0)                         |
| rs34194714 | 4  | 90674018  | 0.0003827 | 0.08154  | 0.0003914 | SNCA(0)                          |
| rs9930307  | 16 | 9899226   | 0.0003828 | -0.03467 | 0.0003679 | GRIN2A(0)                        |
| rs2634999  | 1  | 164395848 | 0.0003832 | -0.07675 | 0.0003651 | .                                |
| rs2177911  | 2  | 3254367   | 0.0003834 | 0.03199  | 0.0003123 | TSSC1(0)                         |
| rs61166105 | 8  | 132725872 | 0.0003834 | -0.04394 | 0.000476  | .                                |
| rs2268362  | 2  | 49201498  | 0.0003836 | -0.05293 | 0.0003522 | FSHR(0)                          |
| rs12601253 | 17 | 8552660   | 0.0003844 | 0.03252  | 0.000344  | MYH10(+18.62kb)                  |
| rs9678632  | 2  | 85847085  | 0.0003848 | -0.03301 | 0.0003411 | USP39(0) TMEM150(+17.26kb) C2orf |
| rs2530419  | 7  | 67144805  | 0.0003853 | -0.05137 | 0.00036   | .                                |
| rs55828608 | 2  | 86679544  | 0.0003856 | 0.04376  | 0.0004016 | JMJD1A(0)                        |
| rs2694081  | 2  | 3277947   | 0.0003858 | 0.03196  | 0.0002999 | TSSC1(0)                         |
| rs12109583 | 5  | 7105348   | 0.000386  | -0.03271 | 0.0002965 | .                                |
| rs13104582 | 4  | 30569423  | 0.0003866 | -0.03196 | 0.0005027 | .                                |
| rs6716008  | 2  | 3284086   | 0.0003874 | 0.03184  | 0.0003012 | TSSC1(0)                         |
| rs2714621  | 7  | 67143072  | 0.0003885 | -0.05013 | 0.000342  | .                                |
| rs17716789 | 16 | 77769679  | 0.000389  | 0.05577  | 0.0004082 | NUDT7(0)                         |
| rs7558737  | 2  | 183239941 | 0.000389  | 0.03498  | 0.0005699 | PDE1A(0)                         |
| rs2555154  | 11 | 6524556   | 0.0003894 | 0.03224  | 0.0004937 | FXC1(+18.64kb) C11orf47(0)       |
| rs61391371 | 6  | 55785805  | 0.0003896 | 0.1305   | 0.0003879 | .                                |
| rs59613942 | 2  | 86780087  | 0.0003897 | 0.04395  | 0.0004329 | VPS24(0)                         |
| rs11915185 | 3  | 197255624 | 0.0003899 | -0.03559 | 0.0003906 | BDH1(0)                          |
| rs7486708  | 12 | 47418285  | 0.0003901 | 0.06437  | 0.0003889 | .                                |
| rs2085009  | 2  | 3281276   | 0.0003911 | 0.03182  | 0.0003041 | TSSC1(0)                         |
| rs2462956  | 2  | 3280842   | 0.0003911 | 0.03182  | 0.0003041 | TSSC1(0)                         |
| rs17151983 | 7  | 127946108 | 0.0003915 | 0.06502  | 0.0003962 | RBM28(-4.327kb)                  |
| rs7790564  | 7  | 25457580  | 0.0003922 | -0.03922 | 0.0005412 | .                                |
| rs3903160  | 6  | 29932897  | 0.0003927 | -0.03497 | 0.0003359 | HLA-A29.1(0) HLA-A(+19.24kb) HCG |
| rs34701978 | 9  | 99209457  | 0.000393  | 0.08108  | 0.0002315 | HABP4(-2.956kb)                  |
| rs7641811  | 3  | 89186548  | 0.0003932 | 0.03791  | 0.0004657 | EPHA3(0)                         |
| rs1476572  | 6  | 29674741  | 0.0003935 | 0.0337   | 0.0003482 | HLA-F(-16.38kb)                  |
| rs41284763 | 4  | 90830603  | 0.0003942 | 0.04447  | 0.0003965 | MMRN1(0)                         |
| rs4941419  | 13 | 42766831  | 0.0003942 | 0.08758  | 0.0004233 | DGKH(0)                          |
| rs4608557  | 2  | 3252099   | 0.0003947 | 0.03166  | 0.0003195 | TSSC1(0)                         |
| rs33959627 | 6  | 30002335  | 0.0003949 | 0.06695  | 0.0003208 | .                                |
| rs34196951 | 18 | 63838093  | 0.0003949 | -0.04013 | 0.0004064 | .                                |
| rs11075982 | 16 | 53720124  | 0.0003954 | -0.06937 | 0.000294  | RPGRIP1L(0) FTO(-17.75kb)        |
| rs11077153 | 16 | 7273288   | 0.0003958 | -0.03391 | 0.0003453 | A2BP1(0)                         |
| rs11934887 | 4  | 78335597  | 0.0003964 | 0.04686  | 0.0004754 | .                                |

|            |    |           |           |          |           |                                  |
|------------|----|-----------|-----------|----------|-----------|----------------------------------|
| rs2870631  | 20 | 54080512  | 0.0003969 | -0.03382 | 0.0004381 | .                                |
| rs7699771  | 4  | 63407474  | 0.0003973 | -0.04675 | 0.0003289 | .                                |
| rs704330   | 1  | 181726413 | 0.0003978 | -0.04298 | 0.0003505 | CACNA1E(0)                       |
| rs2256539  | 6  | 29937740  | 0.0003979 | 0.03224  | 0.0003647 | HLA-A29.1(0) HCG9(-5.151kb)      |
| rs17463162 | 3  | 172125105 | 0.000398  | 0.1113   | 0.0003887 | FNDC3B(+6.618kb)                 |
| rs3815082  | 6  | 30113955  | 0.000398  | -0.03664 | 0.0003236 | TRIM15(-17.03kb) TRIM40(0) TRIM1 |
| rs987177   | 6  | 165567275 | 0.0003982 | -0.03716 | 0.0003371 | .                                |
| rs1334515  | 7  | 80251822  | 0.0003988 | -0.1418  | 0.0003769 | CD36(0)                          |
| rs1334516  | 7  | 80251824  | 0.0003988 | -0.1418  | 0.0003769 | CD36(0)                          |
| rs12455244 | 18 | 50541705  | 0.000399  | 0.0464   | 0.0004157 | DCC(0)                           |
| rs12607155 | 18 | 50539387  | 0.000399  | 0.0464   | 0.0004157 | DCC(0)                           |
| rs4940233  | 18 | 50534370  | 0.000399  | 0.0464   | 0.0004157 | DCC(0)                           |
| rs11078712 | 17 | 7785977   | 0.0003994 | 0.04729  | 0.0003819 | CHD3(-2.145kb)                   |
| rs2608039  | 8  | 129151648 | 0.0003995 | -0.0802  | 0.0003675 | .                                |
| rs482397   | 6  | 69592892  | 0.0003999 | 0.0585   | 0.0002889 | BAI3(0)                          |
| rs9323778  | 14 | 86207490  | 0.0004026 | 0.1169   | 0.0004068 | .                                |
| rs243802   | 6  | 54308717  | 0.0004027 | -0.06517 | 0.0003384 | .                                |
| rs243803   | 6  | 54306884  | 0.0004027 | -0.06517 | 0.0003384 | .                                |
| rs243804   | 6  | 54305162  | 0.0004027 | -0.06517 | 0.0003384 | .                                |
| rs243805   | 6  | 54305059  | 0.0004027 | -0.06517 | 0.0003384 | .                                |
| rs243809   | 6  | 54300766  | 0.0004027 | -0.06517 | 0.0003384 | .                                |
| rs243810   | 6  | 54300597  | 0.0004027 | -0.06517 | 0.0003384 | .                                |
| rs243811   | 6  | 54300346  | 0.0004027 | -0.06517 | 0.0003384 | .                                |
| rs243812   | 6  | 54299987  | 0.0004027 | -0.06517 | 0.0003384 | .                                |
| rs7758611  | 6  | 54299470  | 0.0004027 | -0.06517 | 0.0003384 | .                                |
| rs1955830  | 14 | 27180997  | 0.0004034 | 0.07652  | 0.0007955 | .                                |
| rs1677381  | 5  | 160752997 | 0.0004035 | 0.04588  | 0.0004964 | GABRB2(0)                        |
| rs17251240 | 18 | 73686361  | 0.0004035 | -0.0537  | 0.0003382 | .                                |
| rs8097721  | 18 | 50493272  | 0.0004035 | -0.0373  | 0.0004411 | DCC(0)                           |
| rs3895089  | 1  | 181695986 | 0.0004043 | -0.04206 | 0.0003463 | CACNA1E(0)                       |
| rs8055545  | 16 | 64623803  | 0.0004044 | 0.03276  | 0.0003167 | .                                |
| rs243786   | 6  | 54315939  | 0.0004047 | -0.06484 | 0.0003402 | .                                |
| rs28620524 | 7  | 146901474 | 0.0004048 | 0.1136   | 0.0004259 | CNTNAP2(0)                       |
| rs12693302 | 2  | 183211443 | 0.0004053 | 0.03408  | 0.0004931 | PDE1A(0)                         |
| rs2938897  | 9  | 81103987  | 0.0004057 | 0.04181  | 0.0004349 | .                                |
| rs10078192 | 5  | 14116396  | 0.0004065 | 0.05957  | 0.0004509 | .                                |
| rs11215467 | 11 | 115162376 | 0.000407  | 0.04907  | 0.0004196 | CADM1(0)                         |
| rs13018466 | 2  | 11317226  | 0.0004071 | -0.03213 | 0.0003123 | ROCK2(-4.551kb) PQLC3(0)         |
| rs2188510  | 7  | 92901040  | 0.0004071 | 0.03232  | 0.0004891 | CCDC132(0)                       |
| rs17594634 | 5  | 106821062 | 0.0004079 | -0.1226  | 0.0003853 | EFNA5(0)                         |
| rs441398   | 5  | 115006584 | 0.0004081 | -0.039   | 0.0003349 | .                                |
| rs7103050  | 11 | 127851397 | 0.0004084 | 0.03422  | 0.0005784 | .                                |
| rs61959225 | 13 | 42716318  | 0.0004088 | 0.04681  | 0.0004466 | DGKH(0)                          |
| rs4912947  | 5  | 143166322 | 0.000409  | 0.0364   | 0.0003824 | .                                |
| rs7046639  | 9  | 9602277   | 0.000409  | 0.05527  | 0.0004249 | PTPRD(0)                         |
| rs11077152 | 16 | 7273117   | 0.0004091 | -0.03378 | 0.0003562 | A2BP1(0)                         |
| rs11265783 | 9  | 92121724  | 0.0004099 | -0.03311 | 0.0004219 | .                                |

|            |    |           |           |          |           |                                  |
|------------|----|-----------|-----------|----------|-----------|----------------------------------|
| rs7578733  | 2  | 149027343 | 0.0004102 | 0.1497   | 0.0001465 | .                                |
| rs2075050  | 4  | 13526386  | 0.0004104 | 0.03297  | 0.0003743 | NKX3-2(-16.07kb)                 |
| rs11127392 | 2  | 3251042   | 0.0004109 | 0.03193  | 0.0003462 | TSSC1(0)                         |
| rs7031908  | 9  | 6635045   | 0.0004117 | 0.0378   | 0.0005142 | GLDC(0)                          |
| rs768803   | 8  | 143205625 | 0.0004121 | -0.03441 | 0.000381  | .                                |
| rs6905810  | 6  | 137215531 | 0.0004124 | 0.1523   | 0.0003952 | PEX7(0)                          |
| rs7544827  | 1  | 181717600 | 0.0004127 | -0.04283 | 0.0003551 | CACNA1E(0)                       |
| rs58835755 | 8  | 82171765  | 0.000413  | 0.06564  | 0.0004189 | .                                |
| rs7232361  | 18 | 63905116  | 0.000413  | 0.06088  | 0.0004063 | .                                |
| rs1150144  | 2  | 157178503 | 0.0004136 | -0.03527 | 0.0003795 | NR4A2(-2.44kb)                   |
| rs5910     | 17 | 42449789  | 0.0004137 | 0.03252  | 0.0003279 | ITGA2B(0) GRN(+19.32kb)          |
| rs35994853 | 7  | 128738262 | 0.0004138 | 0.03292  | 0.0006639 | .                                |
| rs2546619  | 5  | 160749179 | 0.0004142 | -0.03754 | 0.0005224 | GABRB2(0)                        |
| rs13315867 | 3  | 89181065  | 0.0004146 | 0.03773  | 0.0004935 | EPHA3(0)                         |
| rs220984   | 20 | 22970047  | 0.0004149 | -0.05074 | 0.0004394 | .                                |
| rs4850569  | 2  | 195786904 | 0.0004149 | 0.04341  | 0.00037   | .                                |
| rs11127391 | 2  | 3250997   | 0.0004157 | 0.03188  | 0.0003539 | TSSC1(0)                         |
| rs6440097  | 3  | 142331719 | 0.000416  | 0.04309  | 0.0004391 | PLS1(-10.62kb)                   |
| rs13286777 | 9  | 99104322  | 0.0004165 | 0.0781   | 0.0002575 | SLC35D2(0)                       |
| rs13291691 | 9  | 99104895  | 0.0004165 | 0.0781   | 0.0002575 | SLC35D2(0)                       |
| rs13291718 | 9  | 99104966  | 0.0004165 | 0.0781   | 0.0002575 | SLC35D2(0)                       |
| rs13291829 | 9  | 99111140  | 0.0004165 | 0.0781   | 0.0002575 | SLC35D2(0)                       |
| rs35527184 | 9  | 99110607  | 0.0004165 | 0.0781   | 0.0002575 | SLC35D2(0)                       |
| rs10144913 | 14 | 86207367  | 0.0004167 | 0.1167   | 0.000416  | .                                |
| rs2255728  | 2  | 3283277   | 0.0004169 | 0.0317   | 0.0003239 | TSSC1(0)                         |
| rs17583437 | 4  | 115807803 | 0.0004171 | 0.06722  | 0.0004248 | NDST4(0)                         |
| rs12330710 | 3  | 27096806  | 0.0004175 | 0.03151  | 0.0004767 | .                                |
| rs4891105  | 18 | 73678506  | 0.0004179 | -0.05397 | 0.0003594 | .                                |
| rs2966031  | 16 | 64700368  | 0.0004181 | 0.03267  | 0.0003031 | .                                |
| rs10016161 | 4  | 14576869  | 0.0004186 | 0.03816  | 0.0004605 | .                                |
| rs10996811 | 10 | 67748124  | 0.0004187 | 0.1079   | 0.0004332 | CTNNA3(0)                        |
| rs34751838 | 9  | 99124505  | 0.0004193 | 0.07807  | 0.0002587 | SLC35D2(0)                       |
| rs35106566 | 9  | 99123227  | 0.0004193 | 0.07807  | 0.0002587 | SLC35D2(0)                       |
| rs35218578 | 9  | 99122112  | 0.0004193 | 0.07807  | 0.0002587 | SLC35D2(0)                       |
| rs35667087 | 9  | 99124786  | 0.0004193 | 0.07807  | 0.0002587 | SLC35D2(0)                       |
| rs1558903  | 16 | 53712628  | 0.0004197 | -0.06912 | 0.0003092 | RPGRIP1L(0)                      |
| rs4133018  | 16 | 53698715  | 0.0004197 | -0.06912 | 0.0003092 | RPGRIP1L(0)                      |
| rs1677380  | 5  | 160752944 | 0.0004199 | -0.03716 | 0.0005182 | GABRB2(0)                        |
| rs55704566 | 18 | 50504110  | 0.0004202 | 0.04569  | 0.0004661 | DCC(0)                           |
| rs1012544  | 18 | 73681589  | 0.0004205 | -0.05354 | 0.0003524 | .                                |
| rs12444754 | 16 | 26518358  | 0.0004207 | 0.0318   | 0.0004897 | .                                |
| rs2938899  | 9  | 81102655  | 0.000421  | 0.04099  | 0.0004583 | .                                |
| rs10943372 | 6  | 77306838  | 0.0004214 | -0.03645 | 0.0004467 | .                                |
| rs9261508  | 6  | 30112704  | 0.0004214 | 0.04733  | 0.0003451 | TRIM15(-18.28kb) TRIM40(0) TRIM1 |
| rs6768846  | 3  | 89183016  | 0.0004215 | 0.03768  | 0.0005016 | EPHA3(0)                         |
| rs61982107 | 14 | 70279976  | 0.0004218 | 0.04521  | 0.0004032 | SLC10A1(+16.02kb)                |
| rs4340348  | 16 | 64690085  | 0.0004221 | 0.03257  | 0.0003157 | .                                |

|            |    |           |           |          |           |                                   |
|------------|----|-----------|-----------|----------|-----------|-----------------------------------|
| rs3010698  | 9  | 81103538  | 0.0004222 | -0.03901 | 0.0004671 | .                                 |
| rs7790159  | 7  | 25457583  | 0.0004222 | 0.04151  | 0.0005856 | .                                 |
| rs11077154 | 16 | 7273595   | 0.0004223 | -0.03365 | 0.0003426 | A2BP1(0)                          |
| rs12051030 | 16 | 7273610   | 0.0004223 | -0.03365 | 0.0003426 | A2BP1(0)                          |
| rs1298520  | 2  | 156544409 | 0.0004225 | 0.03255  | 0.0003802 | .                                 |
| rs2333546  | 18 | 63906678  | 0.0004227 | 0.06554  | 0.0004146 | .                                 |
| rs10136556 | 14 | 24139603  | 0.0004252 | -0.04175 | 0.0005064 | .                                 |
| rs6424819  | 1  | 181671646 | 0.0004252 | 0.04229  | 0.0003691 | CACNA1E(0)                        |
| rs34633268 | 2  | 86666301  | 0.0004255 | 0.04254  | 0.0004581 | JMJD1A(-2.052kb)                  |
| rs56169889 | 2  | 86686285  | 0.0004255 | 0.04254  | 0.0004581 | JMJD1A(0)                         |
| rs56242451 | 2  | 86690056  | 0.0004255 | 0.04254  | 0.0004581 | JMJD1A(0)                         |
| rs56347930 | 2  | 86683901  | 0.0004255 | 0.04254  | 0.0004581 | JMJD1A(0)                         |
| rs57291816 | 2  | 86671868  | 0.0004255 | 0.04254  | 0.0004581 | JMJD1A(0)                         |
| rs58361202 | 2  | 86675231  | 0.0004255 | 0.04254  | 0.0004581 | JMJD1A(0)                         |
| rs59183618 | 2  | 86692772  | 0.0004255 | 0.04254  | 0.0004581 | JMJD1A(0)                         |
| rs12597721 | 16 | 53717174  | 0.0004257 | -0.06903 | 0.0003148 | RPGRIP1L(0)                       |
| rs59594997 | 17 | 16560113  | 0.0004258 | 0.04182  | 0.0005141 | ZNF624(+2.955kb)                  |
| rs8076849  | 17 | 16566247  | 0.0004264 | 0.04136  | 0.0005017 | ZNF624(+9.089kb)                  |
| rs3094727  | 6  | 29672529  | 0.0004269 | 0.03425  | 0.0003667 | HLA-F(-18.59kb)                   |
| rs7591292  | 2  | 183016575 | 0.0004271 | 0.03282  | 0.0004841 | PDE1A(0)                          |
| rs59630213 | 16 | 77777030  | 0.0004272 | 0.0543   | 0.0004544 | NUDT7(+0.876kb)                   |
| rs3766990  | 1  | 181670042 | 0.0004275 | -0.04174 | 0.0003712 | CACNA1E(0)                        |
| rs16890738 | 4  | 14582702  | 0.0004284 | 0.03805  | 0.0004735 | .                                 |
| rs2318363  | 8  | 139950489 | 0.0004285 | 0.05883  | 0.0004102 | .                                 |
| rs746278   | 3  | 10968172  | 0.0004289 | -0.03809 | 0.0004613 | SLC6A11(0)                        |
| rs9821502  | 3  | 89199301  | 0.0004291 | 0.03771  | 0.0005027 | EPHA3(0)                          |
| rs6750358  | 2  | 3161627   | 0.0004293 | -0.04028 | 0.0009008 | .                                 |
| rs1944298  | 18 | 57141534  | 0.0004303 | -0.08805 | 0.0003921 | CCBE1(0)                          |
| rs11793039 | 9  | 117464242 | 0.0004309 | -0.0569  | 0.0003884 | .                                 |
| rs17243759 | 11 | 6518932   | 0.0004321 | -0.03324 | 0.0003781 | FXC1(+13.02kb) C11orf47(0) ARFIP  |
| rs10801626 | 1  | 197823154 | 0.0004328 | 0.03381  | 0.0004351 | .                                 |
| rs12961243 | 18 | 63901750  | 0.0004331 | 0.06538  | 0.0004281 | .                                 |
| rs1437747  | 2  | 44865678  | 0.0004331 | -0.03513 | 0.0004417 | C2orf34(0)                        |
| rs834834   | 2  | 157183635 | 0.0004331 | 0.03166  | 0.0004018 | NR4A2(0)                          |
| rs12053267 | 2  | 3248464   | 0.0004334 | 0.03141  | 0.0003504 | TSSC1(0)                          |
| rs987319   | 1  | 201539249 | 0.0004339 | 0.07597  | 0.0004458 | .                                 |
| rs8095755  | 18 | 38943445  | 0.000435  | -0.03575 | 0.0005744 | .                                 |
| rs11708608 | 3  | 137292104 | 0.0004354 | -0.04699 | 0.0004435 | .                                 |
| rs4762969  | 12 | 20699519  | 0.0004356 | 0.0329   | 0.0004521 | PDE3A(0)                          |
| rs1012651  | 16 | 26511474  | 0.0004359 | 0.03194  | 0.0005058 | .                                 |
| rs12598634 | 16 | 53692238  | 0.000436  | -0.06913 | 0.00032   | RPGRIP1L(0)                       |
| rs4574621  | 6  | 19160358  | 0.0004363 | -0.03789 | 0.0006143 | .                                 |
| rs7188841  | 16 | 9904150   | 0.0004368 | -0.03575 | 0.0004079 | GRIN2A(0)                         |
| rs17318284 | 2  | 44875897  | 0.0004374 | 0.0318   | 0.000431  | C2orf34(0)                        |
| rs4477117  | 9  | 29630409  | 0.0004377 | -0.03753 | 0.0002988 | .                                 |
| rs9261440  | 6  | 30090820  | 0.0004377 | 0.03563  | 0.0003371 | TRIM40(-13.69kb) TRIM31(+9.953kb) |
| rs12445162 | 16 | 53750137  | 0.0004383 | -0.06718 | 0.0003245 | RPGRIP1L(+12.37kb) FTO(0)         |

|            |    |           |           |          |           |                                   |
|------------|----|-----------|-----------|----------|-----------|-----------------------------------|
| rs1632963  | 6  | 29683528  | 0.0004384 | 0.03353  | 0.0003766 | HLA-F(-7.588kb)                   |
| rs7611735  | 3  | 89186994  | 0.0004385 | 0.03758  | 0.0005185 | EPHA3(0)                          |
| rs2729118  | 3  | 1118039   | 0.0004402 | 0.038    | 0.0002238 | CNTN6(-16.59kb)                   |
| rs457963   | 5  | 62559532  | 0.0004403 | -0.03544 | 0.0003335 | .                                 |
| rs7018088  | 8  | 129221767 | 0.0004404 | -0.05651 | 0.0003972 | .                                 |
| rs11127393 | 2  | 3251219   | 0.0004406 | 0.03138  | 0.000357  | TSSC1(0)                          |
| rs12471956 | 2  | 3249803   | 0.0004406 | 0.03138  | 0.000357  | TSSC1(0)                          |
| rs1869418  | 2  | 3249910   | 0.0004406 | 0.03138  | 0.000357  | TSSC1(0)                          |
| rs4411728  | 2  | 3252656   | 0.0004406 | 0.03138  | 0.000357  | TSSC1(0)                          |
| rs4493298  | 2  | 3254133   | 0.0004406 | 0.03138  | 0.000357  | TSSC1(0)                          |
| rs4854156  | 2  | 3252456   | 0.0004406 | 0.03138  | 0.000357  | TSSC1(0)                          |
| rs7557707  | 2  | 3250382   | 0.0004406 | 0.03138  | 0.000357  | TSSC1(0)                          |
| rs10402271 | 19 | 45329214  | 0.0004416 | -0.03316 | 0.0005662 | BCAM(+4.536kb)                    |
| rs16917152 | 9  | 31565044  | 0.0004419 | -0.09535 | 0.0004137 | .                                 |
| rs7191183  | 16 | 9900057   | 0.0004429 | -0.03426 | 0.0004256 | GRIN2A(0)                         |
| rs311326   | 6  | 153137621 | 0.000443  | 0.04319  | 0.0006179 | .                                 |
| rs9620955  | 22 | 30562384  | 0.0004431 | 0.05376  | 0.0004722 | HORMAD2(0)                        |
| rs9627438  | 22 | 46783900  | 0.0004436 | 0.06239  | 0.0005912 | CELSR1(0)                         |
| rs1861192  | 16 | 9908091   | 0.000444  | -0.03545 | 0.000436  | GRIN2A(0)                         |
| rs34971426 | 18 | 63829409  | 0.0004443 | 0.06656  | 0.0004537 | .                                 |
| rs9868838  | 3  | 89191493  | 0.0004444 | 0.03761  | 0.0005212 | EPHA3(0)                          |
| rs10890872 | 11 | 108503567 | 0.0004449 | -0.03947 | 0.0006805 | .                                 |
| rs10412413 | 19 | 45327309  | 0.000445  | -0.03333 | 0.0005672 | BCAM(+2.631kb)                    |
| rs7407955  | 18 | 73683930  | 0.0004452 | -0.05311 | 0.000364  | .                                 |
| rs57445595 | 6  | 165548304 | 0.0004454 | -0.04554 | 0.000354  | .                                 |
| rs11045293 | 12 | 20676867  | 0.0004469 | -0.03172 | 0.0003719 | PDE3A(0)                          |
| rs12435253 | 14 | 71473847  | 0.0004475 | -0.05075 | 0.0003989 | PCNX(0)                           |
| rs2167967  | 2  | 3159760   | 0.0004478 | -0.04083 | 0.0006722 | .                                 |
| rs2938898  | 9  | 81103454  | 0.0004478 | 0.04104  | 0.0004881 | .                                 |
| rs1440220  | 4  | 47984713  | 0.0004481 | -0.03978 | 0.0004239 | .                                 |
| rs2368681  | 2  | 3284331   | 0.0004482 | 0.03189  | 0.0003537 | TSSC1(0)                          |
| rs35877173 | 20 | 11575962  | 0.0004486 | -0.04048 | 0.0004761 | .                                 |
| rs4902571  | 14 | 68819234  | 0.0004486 | 0.04939  | 0.0003212 | RAD51L1(0)                        |
| rs6841271  | 4  | 47966636  | 0.0004491 | -0.03916 | 0.0004439 | CNGA1(+11.91kb)                   |
| rs12624259 | 2  | 183025908 | 0.0004492 | 0.0321   | 0.0005302 | PDE1A(0)                          |
| rs1392909  | 4  | 14567771  | 0.0004506 | 0.03824  | 0.0004988 | .                                 |
| rs17304799 | 2  | 156504474 | 0.0004508 | 0.03402  | 0.000434  | .                                 |
| rs11185388 | 1  | 104741354 | 0.0004514 | -0.03059 | 0.0004777 | .                                 |
| rs2723655  | 11 | 6516755   | 0.0004533 | 0.03221  | 0.0005703 | FXC1(+10.84kb) C11orf47(-1.775kb) |
| rs3741333  | 11 | 118986972 | 0.0004537 | -0.06385 | 0.0003772 | MIZF(-5.315kb) DPAGT1(+14.19kb)   |
| rs12639827 | 4  | 136229278 | 0.0004562 | -0.03207 | 0.0003525 | .                                 |
| rs2025679  | 6  | 19023147  | 0.0004562 | -0.03853 | 0.0006178 | .                                 |
| rs4112273  | 10 | 99863227  | 0.0004563 | -0.03174 | 0.000419  | .                                 |
| rs2893207  | 7  | 25457072  | 0.0004564 | -0.03748 | 0.0006347 | .                                 |
| rs7775944  | 6  | 123956349 | 0.0004568 | -0.07828 | 0.0003817 | TRDN(0)                           |
| rs2151507  | 20 | 56850428  | 0.0004571 | -0.05268 | 0.0007074 | .                                 |
| rs2949063  | 2  | 36131188  | 0.0004571 | 0.03465  | 0.0004466 | .                                 |



|            |    |           |           |          |           |                                   |
|------------|----|-----------|-----------|----------|-----------|-----------------------------------|
| rs10922305 | 1  | 197821769 | 0.0004573 | 0.03816  | 0.0005513 | .                                 |
| rs675835   | 18 | 57169168  | 0.0004579 | -0.06184 | 0.0004098 | CCBE1(0)                          |
| rs1722501  | 7  | 80244694  | 0.000458  | -0.1385  | 0.0004349 | CD36(0)                           |
| rs7647212  | 3  | 142322055 | 0.0004584 | 0.04292  | 0.0004972 | .                                 |
| rs4523575  | 1  | 204288527 | 0.0004585 | -0.03335 | 0.0003263 | PLEKHA6(0)                        |
| rs7298061  | 12 | 126760496 | 0.0004586 | -0.03158 | 0.0002974 | .                                 |
| rs62124329 | 19 | 33148293  | 0.0004588 | 0.1322   | 0.0004399 | RGS9BP(-18.02kb) ANKRD27(0)       |
| rs173768   | 5  | 160747541 | 0.0004591 | -0.03689 | 0.0005546 | GABRB2(0)                         |
| rs253001   | 5  | 160747987 | 0.0004591 | -0.03689 | 0.0005546 | GABRB2(0)                         |
| rs6856727  | 4  | 153121818 | 0.0004596 | -0.03763 | 0.0003472 | .                                 |
| rs7647240  | 3  | 89243497  | 0.0004597 | 0.03963  | 0.0005137 | EPHA3(0)                          |
| rs10757060 | 9  | 19446853  | 0.00046   | -0.03103 | 0.0005838 | ASAH3L(0)                         |
| rs13334070 | 16 | 53724970  | 0.0004601 | -0.06709 | 0.0003314 | RPGRIP1L(0) FTO(-12.9kb)          |
| rs4150894  | 8  | 86104868  | 0.0004601 | -0.1421  | 0.0004389 | E2F5(0)                           |
| rs4245074  | 11 | 127894927 | 0.0004603 | 0.03235  | 0.0004276 | .                                 |
| rs1518808  | 2  | 86646193  | 0.0004608 | 0.04225  | 0.0004991 | .                                 |
| rs1518810  | 2  | 86649433  | 0.0004608 | 0.04225  | 0.0004991 | JMJD1A(-18.92kb)                  |
| rs7617491  | 3  | 27097059  | 0.0004608 | 0.03139  | 0.0005354 | .                                 |
| rs3103980  | 8  | 119821583 | 0.0004609 | -0.05041 | 0.0007817 | .                                 |
| rs7755060  | 6  | 19019574  | 0.0004615 | -0.03811 | 0.0006747 | .                                 |
| rs57999769 | 8  | 82171118  | 0.0004616 | 0.05444  | 0.0004685 | .                                 |
| rs12829722 | 12 | 121155622 | 0.000462  | 0.03755  | 0.0004635 | UNC119B(0) KIAA0152(+15.96kb) AC  |
| rs4938196  | 11 | 115164267 | 0.0004623 | 0.04939  | 0.0004775 | CADM1(0)                          |
| rs9807708  | 18 | 10699935  | 0.0004634 | 0.03753  | 0.0004036 | FAM38B(+2.121kb)                  |
| rs11211241 | 1  | 46452683  | 0.000464  | -0.0323  | 0.0003847 | MAST2(0)                          |
| rs10789673 | 11 | 108498988 | 0.0004641 | -0.0394  | 0.0007072 | .                                 |
| rs2250886  | 11 | 6529642   | 0.0004641 | -0.0394  | 0.0005917 | C11orf47(0)                       |
| rs7933048  | 11 | 108500040 | 0.0004641 | 0.0319   | 0.0007072 | .                                 |
| rs17013571 | 2  | 127077776 | 0.0004644 | 0.04251  | 0.0005902 | .                                 |
| rs17588122 | 2  | 51520394  | 0.0004645 | 0.1333   | 0.0004721 | .                                 |
| rs4078324  | 1  | 204264359 | 0.0004648 | -0.03129 | 0.0004882 | PLEKHA6(0)                        |
| rs2163156  | 5  | 97050542  | 0.0004657 | 0.03285  | 0.000434  | .                                 |
| rs2963077  | 5  | 146292145 | 0.0004657 | 0.07062  | 0.000583  | PPP2R2B(0)                        |
| rs17780311 | 18 | 57162986  | 0.0004662 | -0.0792  | 0.0004373 | CCBE1(0)                          |
| rs9997675  | 4  | 47967593  | 0.0004667 | -0.03907 | 0.00046   | CNGA1(+12.87kb)                   |
| rs517545   | 3  | 124163690 | 0.000467  | -0.03207 | 0.0003985 | KALRN(0)                          |
| rs59565858 | 11 | 118986456 | 0.0004671 | -0.06377 | 0.0003875 | MIZF(-5.831kb) DPAGT1(+13.67kb)   |
| rs62009533 | 15 | 22878582  | 0.0004677 | 0.04266  | 0.0004266 | TUBGCP5(+4.691kb) CYFIP1(-14.1kb) |
| rs4309823  | 4  | 153136125 | 0.0004683 | -0.04864 | 0.0004198 | .                                 |
| rs9868309  | 3  | 142335332 | 0.0004684 | 0.04291  | 0.0004985 | PLS1(-7.011kb)                    |
| rs1233394  | 6  | 29549261  | 0.0004687 | 0.03489  | 0.0004292 | OR2H2(-6.421kb)                   |
| rs6502515  | 17 | 16512675  | 0.0004687 | -0.04396 | 0.0005062 | ZNF624(-11.37kb)                  |
| rs1644517  | 5  | 160751493 | 0.0004688 | -0.03682 | 0.0005787 | GABRB2(0)                         |
| rs9848187  | 3  | 89196729  | 0.0004693 | 0.03746  | 0.0005492 | EPHA3(0)                          |
| rs59883476 | 2  | 183249317 | 0.0004694 | 0.03482  | 0.0007295 | PDE1A(0)                          |
| rs56163086 | 2  | 99298202  | 0.0004695 | -0.03392 | 0.0006259 | MGAT4A(0)                         |
| rs7247050  | 19 | 12729317  | 0.0004698 | 0.03345  | 0.0005403 | ZNF791(0) ZNF490(+7.722kb)        |

|            |    |           |           |          |           |                                  |
|------------|----|-----------|-----------|----------|-----------|----------------------------------|
| rs9883005  | 3  | 89219124  | 0.0004708 | 0.03744  | 0.0005569 | EPHA3(0)                         |
| rs11040900 | 11 | 6524240   | 0.000471  | -0.06367 | 0.0004206 | FXC1(+18.33kb) C11orf47(0)       |
| rs59255488 | 11 | 118986118 | 0.000471  | -0.03297 | 0.0003918 | MIZF(-6.169kb) H2AFX(+19.94kb) D |
| rs13126967 | 4  | 30542584  | 0.0004714 | -0.03118 | 0.0006103 | .                                |
| rs10497597 | 2  | 183263753 | 0.0004715 | 0.03527  | 0.0006922 | PDE1A(0)                         |
| rs13247061 | 7  | 25458920  | 0.0004717 | -0.03907 | 0.0004381 | .                                |
| rs6447602  | 4  | 47959022  | 0.0004717 | -0.03943 | 0.0004724 | CNGA1(+4.296kb)                  |
| rs12330906 | 3  | 27096656  | 0.0004723 | 0.03141  | 0.0005233 | .                                |
| rs6733550  | 2  | 85828014  | 0.0004725 | -0.03234 | 0.0004234 | VAMP8(+18.86kb) VAMP5(+7.503kb)  |
| rs253016   | 5  | 160743764 | 0.0004728 | -0.03116 | 0.0005717 | GABRB2(0)                        |
| rs4767401  | 12 | 116842156 | 0.0004728 | -0.03699 | 0.0004537 | .                                |
| rs56055358 | 2  | 86698553  | 0.0004733 | 0.04221  | 0.0005122 | JMJD1A(0)                        |
| rs11760667 | 7  | 77855323  | 0.0004739 | 0.03132  | 0.00056   | MAGI2(0)                         |
| rs17304645 | 2  | 156502635 | 0.000474  | 0.03388  | 0.0004589 | .                                |
| rs987579   | 14 | 71513480  | 0.0004742 | -0.04998 | 0.0004156 | PCNX(0)                          |
| rs894278   | 4  | 90734535  | 0.0004743 | 0.06869  | 0.0004869 | SNCA(0)                          |
| rs4900980  | 14 | 50517910  | 0.0004745 | -0.03911 | 0.000414  | .                                |
| rs13147816 | 4  | 136228438 | 0.0004746 | -0.03257 | 0.0004176 | .                                |
| rs4262084  | 5  | 72521202  | 0.0004751 | 0.03369  | 0.0004311 | .                                |
| rs12043482 | 1  | 197817740 | 0.0004754 | 0.03804  | 0.0005724 | .                                |
| rs7654246  | 4  | 110157491 | 0.0004761 | -0.03254 | 0.0004306 | COL25A1(0)                       |
| rs10473935 | 5  | 72523428  | 0.0004762 | 0.03392  | 0.0003731 | .                                |
| rs3014247  | 1  | 46163733  | 0.0004766 | -0.03204 | 0.0003939 | TMEM69(+3.625kb) IPP(-0.673kb)   |
| rs10015317 | 4  | 110161875 | 0.0004773 | -0.0326  | 0.0004461 | COL25A1(0)                       |
| rs12599095 | 16 | 53689640  | 0.0004774 | -0.06865 | 0.0003515 | RPGRIP1L(0)                      |
| rs13088443 | 3  | 82538915  | 0.0004774 | -0.05111 | 0.0004052 | .                                |
| rs62258752 | 3  | 82539388  | 0.0004774 | -0.05111 | 0.0004052 | .                                |
| rs4855485  | 3  | 68545955  | 0.0004781 | 0.03167  | 0.0004865 | FAM19A1(0)                       |
| rs2298727  | 4  | 90742861  | 0.0004785 | 0.06995  | 0.0004897 | SNCA(0)                          |
| rs2298728  | 4  | 90742815  | 0.0004785 | 0.06995  | 0.0004897 | SNCA(0)                          |
| rs11692209 | 2  | 156505758 | 0.000479  | 0.03389  | 0.0004631 | .                                |
| rs12493344 | 3  | 64326764  | 0.0004794 | 0.03136  | 0.0004402 | .                                |
| rs2100420  | 2  | 3281084   | 0.0004794 | -0.08565 | 0.0003737 | TSSC1(0)                         |
| rs28798133 | 7  | 70522746  | 0.0004798 | 0.05093  | 0.000491  | .                                |
| rs9594686  | 13 | 42723197  | 0.000481  | 0.04351  | 0.0005143 | DGKH(0)                          |
| rs3792230  | 2  | 69097294  | 0.0004814 | -0.03216 | 0.0004054 | BMP10(0)                         |
| rs12447949 | 16 | 53681237  | 0.0004818 | -0.06761 | 0.0003561 | RPGRIP1L(0)                      |
| rs12597471 | 16 | 53678429  | 0.0004818 | -0.06761 | 0.0003561 | RPGRIP1L(0)                      |
| rs35343031 | 16 | 53659779  | 0.0004818 | -0.06761 | 0.0003561 | RPGRIP1L(0)                      |
| rs58848019 | 16 | 53668214  | 0.0004818 | -0.06761 | 0.0003561 | RPGRIP1L(0)                      |
| rs2694099  | 2  | 3245583   | 0.0004819 | 0.03172  | 0.0003869 | TSSC1(0)                         |
| rs7144796  | 14 | 21946473  | 0.000482  | -0.03165 | 0.0003904 | TOX4(0) RAB2B(+1.352kb) METTL3(- |
| rs13284939 | 9  | 99165955  | 0.0004824 | 0.08119  | 0.0002849 | ZNF367(0)                        |
| rs13301347 | 9  | 99169603  | 0.0004824 | 0.08119  | 0.0002849 | ZNF367(0)                        |
| rs34274103 | 9  | 99167982  | 0.0004824 | 0.08119  | 0.0002849 | ZNF367(0)                        |
| rs34409187 | 9  | 99167092  | 0.0004824 | 0.08119  | 0.0002849 | ZNF367(0)                        |
| rs35284849 | 9  | 99166381  | 0.0004824 | 0.08119  | 0.0002849 | ZNF367(0)                        |

|            |    |           |           |          |           |                                  |
|------------|----|-----------|-----------|----------|-----------|----------------------------------|
| rs4531346  | 1  | 204269185 | 0.0004825 | -0.03427 | 0.0003652 | PLEKHA6(0)                       |
| rs1150146  | 2  | 157180255 | 0.0004826 | -0.03493 | 0.000461  | NR4A2(-0.688kb)                  |
| rs13288977 | 9  | 99092433  | 0.0004833 | 0.08377  | 0.000285  | SLC35D2(0)                       |
| rs12956599 | 18 | 63877457  | 0.0004836 | -0.03145 | 0.0004899 | .                                |
| rs12967935 | 18 | 63882136  | 0.0004836 | 0.06428  | 0.0004899 | .                                |
| rs34333736 | 18 | 63876622  | 0.0004836 | 0.06428  | 0.0004899 | .                                |
| rs34480878 | 18 | 63876375  | 0.0004836 | 0.06428  | 0.0004899 | .                                |
| rs35473105 | 18 | 63876482  | 0.0004836 | 0.06428  | 0.0004899 | .                                |
| rs36063577 | 18 | 63882954  | 0.0004836 | 0.06428  | 0.0004899 | .                                |
| rs55993797 | 3  | 193469863 | 0.0004836 | 0.06428  | 0.0005387 | .                                |
| rs6679074  | 1  | 204265128 | 0.0004836 | 0.06428  | 0.0005067 | PLEKHA6(0)                       |
| rs7229915  | 18 | 63878048  | 0.0004836 | 0.03947  | 0.0004899 | .                                |
| rs7625393  | 3  | 193470677 | 0.0004836 | 0.03947  | 0.0005387 | .                                |
| rs11953937 | 5  | 72520347  | 0.0004837 | 0.03375  | 0.0004344 | .                                |
| rs17256483 | 14 | 24136279  | 0.0004839 | 0.04199  | 0.0005237 | .                                |
| rs1964854  | 14 | 68829522  | 0.000484  | -0.04041 | 0.0003531 | RAD51L1(0)                       |
| rs12272600 | 11 | 6520920   | 0.0004842 | -0.0329  | 0.0004316 | FXC1(+15.01kb) C11orf47(0) ARFIP |
| rs9807988  | 2  | 69096839  | 0.0004847 | -0.03213 | 0.0004099 | BMP10(0)                         |
| rs2723620  | 11 | 6523657   | 0.000485  | 0.03159  | 0.0006008 | FXC1(+17.75kb) C11orf47(0)       |
| rs10922304 | 1  | 197820945 | 0.0004854 | 0.03797  | 0.0005866 | .                                |
| rs13287429 | 9  | 99173525  | 0.000486  | 0.08112  | 0.0002882 | ZNF367(0)                        |
| rs13302443 | 9  | 99172336  | 0.000486  | 0.08112  | 0.0002882 | ZNF367(0)                        |
| rs34304316 | 9  | 99170847  | 0.000486  | 0.08112  | 0.0002882 | ZNF367(0)                        |
| rs35538343 | 9  | 99171706  | 0.000486  | 0.08112  | 0.0002882 | ZNF367(0)                        |
| rs12702390 | 7  | 47841059  | 0.0004866 | 0.03455  | 0.0007275 | PKD1L1(0) FLJ21075(0)            |
| rs167692   | 4  | 47986088  | 0.0004869 | -0.03921 | 0.0004653 | .                                |
| rs1033028  | 15 | 60616935  | 0.0004872 | -0.03188 | 0.0005855 | .                                |
| rs13259412 | 8  | 51552744  | 0.0004873 | -0.04638 | 0.0004228 | SNTG1(0)                         |
| rs12149525 | 16 | 64687919  | 0.0004881 | 0.03228  | 0.0003658 | .                                |
| rs4754336  | 11 | 108502718 | 0.0004883 | -0.03919 | 0.0007486 | .                                |
| rs2765019  | 1  | 1300022   | 0.0004884 | -0.1208  | 0.0004688 | MXRA8(+6.107kb) DVL1(+15.53kb) A |
| rs4497714  | 16 | 64693028  | 0.0004892 | 0.03228  | 0.0003573 | .                                |
| rs1501150  | 4  | 14581820  | 0.0004898 | 0.03809  | 0.0005279 | .                                |
| rs4694878  | 4  | 47952213  | 0.00049   | -0.03866 | 0.000494  | CNGA1(0)                         |
| rs10826677 | 10 | 29988977  | 0.0004902 | -0.03147 | 0.0004797 | SVIL(0)                          |
| rs17152000 | 7  | 127956424 | 0.0004902 | 0.0638   | 0.0004977 | RBM28(0)                         |
| rs7044847  | 9  | 29630811  | 0.0004904 | 0.03529  | 0.0003342 | .                                |
| rs10793761 | 1  | 204321018 | 0.0004906 | -0.0325  | 0.0003346 | PLEKHA6(0)                       |
| rs17151996 | 7  | 127954710 | 0.0004908 | 0.04346  | 0.0005005 | RBM28(0)                         |
| rs61959256 | 13 | 42785399  | 0.0004908 | 0.06377  | 0.0005258 | DGKH(0)                          |
| rs4776319  | 15 | 67074943  | 0.0004909 | 0.08114  | 0.0004699 | SMAD6(+0.617kb)                  |
| rs7694566  | 4  | 47356231  | 0.0004909 | 0.03322  | 0.000446  | GABRB1(0)                        |
| rs62061162 | 17 | 7281199   | 0.000491  | -0.03609 | 0.0004901 | TNK1(-3.165kb) PLSCR3(-11.86kb)  |
| rs56090468 | 10 | 69419874  | 0.0004914 | 0.066    | 0.0005141 | CTNNA3(0)                        |
| rs12930928 | 16 | 64713170  | 0.0004917 | 0.03226  | 0.0003573 | .                                |
| rs12931228 | 16 | 64713299  | 0.0004917 | 0.03226  | 0.0003573 | .                                |
| rs2710680  | 2  | 17813090  | 0.0004926 | -0.03589 | 0.0003773 | VSNL1(0)                         |

|            |    |           |           |          |           |                                   |
|------------|----|-----------|-----------|----------|-----------|-----------------------------------|
| rs62166774 | 2  | 85853463  | 0.0004932 | -0.03247 | 0.0004407 | USP39(0) C2orf68(+14.31kb)        |
| rs2064769  | 14 | 59500989  | 0.0004933 | 0.03128  | 0.0004647 | .                                 |
| rs28508289 | 15 | 60637412  | 0.0004933 | -0.03161 | 0.0005918 | ANXA2(-1.937kb)                   |
| rs878192   | 11 | 108508843 | 0.0004939 | -0.03905 | 0.0007791 | .                                 |
| rs850737   | 17 | 42443784  | 0.000494  | 0.03146  | 0.00041   | ITGA2B(-5.765kb) GRN(+13.31kb)    |
| rs17638685 | 4  | 136164162 | 0.0004943 | 0.03417  | 0.0004982 | .                                 |
| rs61831393 | 1  | 194047517 | 0.0004945 | -0.0489  | 0.000596  | .                                 |
| rs17016235 | 4  | 90737879  | 0.0004952 | 0.06917  | 0.0005104 | SNCA(0)                           |
| rs2312076  | 2  | 69094904  | 0.0004957 | -0.03269 | 0.0004012 | BMP10(0)                          |
| rs12599697 | 16 | 64712699  | 0.0004958 | 0.03223  | 0.0003609 | .                                 |
| rs12919285 | 16 | 64709018  | 0.0004958 | 0.03223  | 0.0003609 | .                                 |
| rs974187   | 16 | 64708572  | 0.0004958 | 0.03223  | 0.0003609 | .                                 |
| rs2723652  | 11 | 6534081   | 0.000496  | 0.03216  | 0.0006236 | C11orf47(0)                       |
| rs906178   | 17 | 79165972  | 0.0004966 | 0.1011   | 0.0007672 | AZI1(0)                           |
| rs4804727  | 19 | 12752898  | 0.0004971 | 0.03391  | 0.0005547 | ZNF791(+12.22kb) MAN2B1(-4.423kb) |
| rs2720682  | 8  | 129145311 | 0.0004974 | -0.08361 | 0.0004483 | .                                 |
| rs58829418 | 2  | 86699716  | 0.0004977 | 0.04202  | 0.0005406 | JMJD1A(0)                         |
| rs59255035 | 2  | 86706693  | 0.0004977 | 0.04202  | 0.0005406 | JMJD1A(0)                         |
| rs60717666 | 2  | 86706834  | 0.0004977 | 0.04202  | 0.0005406 | JMJD1A(0)                         |
| rs7042951  | 9  | 119305421 | 0.0004978 | 0.04933  | 0.0004898 | ASTN2(0)                          |
| rs11040902 | 11 | 6526051   | 0.000498  | -0.03367 | 0.0004377 | C11orf47(0)                       |
| rs1902780  | 8  | 129211788 | 0.0004985 | -0.05471 | 0.0004602 | .                                 |
| rs7029245  | 9  | 6634641   | 0.0004988 | 0.03743  | 0.0006392 | GLDC(0)                           |
| rs41281728 | 7  | 127953113 | 0.0004994 | 0.06366  | 0.0005108 | RBM28(0)                          |
| rs2530415  | 7  | 67142615  | 0.0004996 | -0.04912 | 0.0004501 | .                                 |
| rs362461   | 4  | 114156117 | 0.0005001 | 0.03147  | 0.0006062 | ANK2(0)                           |
| rs8058083  | 16 | 64672157  | 0.0005001 | 0.03704  | 0.0004147 | .                                 |
| rs4760050  | 12 | 130599796 | 0.0005003 | 0.04697  | 0.0003811 | .                                 |
| rs2905924  | 16 | 64698436  | 0.0005013 | 0.0322   | 0.0003659 | .                                 |
| rs2905926  | 16 | 64704573  | 0.0005013 | 0.0322   | 0.0003659 | .                                 |
| rs7763655  | 6  | 155200674 | 0.0005015 | -0.03999 | 0.0003417 | .                                 |
| rs2377853  | 1  | 31894594  | 0.0005024 | -0.03388 | 0.0006777 | SERINC2(0)                        |
| rs10876471 | 12 | 54024544  | 0.0005027 | -0.04076 | 0.0003556 | ATF7(+4.345kb)                    |
| rs10747299 | 14 | 68888659  | 0.0005029 | 0.03331  | 0.0004352 | RAD51L1(0)                        |
| rs1885994  | 13 | 95457566  | 0.0005029 | -0.03379 | 0.0006711 | .                                 |
| rs3815914  | 19 | 12760664  | 0.0005032 | 0.03339  | 0.0005636 | ZNF791(+19.99kb) MORG1(-16.96kb)  |
| rs500324   | 5  | 152856817 | 0.0005032 | 0.1016   | 0.0004914 | GRIA1(-13.27kb)                   |
| rs6577971  | 8  | 139950257 | 0.0005039 | 0.05814  | 0.0004801 | .                                 |
| rs988731   | 2  | 88368598  | 0.0005044 | 0.04304  | 0.0004078 | SMYD1(0) KRCC1(+13.35kb)          |
| rs2429641  | 7  | 77881530  | 0.0005045 | 0.03225  | 0.0005217 | MAGI2(0)                          |
| rs35065    | 12 | 31149663  | 0.0005048 | 0.05339  | 0.0004184 | TSPAN11(+4.208kb)                 |
| rs507859   | 11 | 65471982  | 0.0005049 | -0.03034 | 0.00041   | RNASEH2C(-13.16kb) KAT5(-7.506kb) |
| rs17626732 | 2  | 195808307 | 0.0005051 | -0.06036 | 0.0004543 | .                                 |
| rs4688978  | 4  | 6233890   | 0.000506  | -0.03228 | 0.0003959 | .                                 |
| rs2511225  | 11 | 66248431  | 0.0005062 | -0.03295 | 0.0007227 | PELI3(+3.623kb) DPP3(0)           |
| rs58279771 | 3  | 58329262  | 0.0005062 | 0.03226  | 0.0006296 | PXK(0)                            |
| rs1961066  | 12 | 91481361  | 0.0005065 | 0.03444  | 0.0004976 | LUM(-15.87kb)                     |

|            |    |           |           |          |           |                  |
|------------|----|-----------|-----------|----------|-----------|------------------|
| rs4746909  | 10 | 71527319  | 0.0005073 | 0.07323  | 0.0005551 | .                |
| rs318627   | 7  | 34251372  | 0.0005079 | 0.1366   | 0.0004719 | .                |
| rs12955304 | 18 | 63900248  | 0.0005081 | 0.06413  | 0.000506  | .                |
| rs12955588 | 18 | 63898502  | 0.0005081 | 0.06413  | 0.000506  | .                |
| rs12956215 | 18 | 63900778  | 0.0005081 | 0.06413  | 0.000506  | .                |
| rs12968004 | 18 | 63897909  | 0.0005081 | 0.06413  | 0.000506  | .                |
| rs35278183 | 18 | 63898061  | 0.0005081 | 0.06413  | 0.000506  | .                |
| rs6566195  | 18 | 63899311  | 0.0005081 | 0.06413  | 0.000506  | .                |
| rs7231542  | 18 | 63896086  | 0.0005081 | 0.06413  | 0.000506  | .                |
| rs6836518  | 4  | 114206398 | 0.0005084 | 0.03612  | 0.0005643 | ANK2(0)          |
| rs12886719 | 14 | 24135097  | 0.0005086 | 0.04187  | 0.0005484 | .                |
| rs56378606 | 2  | 86826271  | 0.0005086 | 0.04285  | 0.0005584 | RNF103(-4.244kb) |
| rs61876825 | 11 | 6528681   | 0.0005091 | -0.03281 | 0.0004608 | C11orf47(0)      |
| rs2431695  | 5  | 159878068 | 0.0005093 | -0.03102 | 0.0005542 | .                |
| rs1011572  | 2  | 53551600  | 0.0005099 | 0.0726   | 0.0004008 | .                |
| rs12323251 | 13 | 76400939  | 0.0005099 | -0.03154 | 0.000518  | LMO7(0)          |
| rs10074446 | 5  | 72524578  | 0.0005102 | -0.04092 | 0.0004618 | .                |
| rs10876470 | 12 | 54023491  | 0.0005102 | 0.03363  | 0.0003616 | ATF7(+3.292kb)   |
| rs11189489 | 10 | 99863825  | 0.0005104 | -0.0313  | 0.0004447 | .                |
| rs13424339 | 2  | 3249259   | 0.0005107 | 0.03101  | 0.0004351 | TSSC1(0)         |
| rs12148075 | 15 | 67049456  | 0.0005108 | 0.08474  | 0.0005178 | SMAD6(0)         |
| rs6740863  | 2  | 86764680  | 0.0005109 | 0.04212  | 0.0005439 | VPS24(0)         |
| rs9813377  | 3  | 142321717 | 0.0005113 | 0.04295  | 0.0005379 | .                |
| rs62444027 | 6  | 165530562 | 0.0005115 | -0.04565 | 0.0004168 | .                |
| rs7163836  | 15 | 60640228  | 0.0005116 | -0.03155 | 0.0006111 | ANXA2(0)         |
| rs7046160  | 9  | 114975791 | 0.0005121 | -0.03739 | 0.0004532 | ROD1(-4.925kb)   |
| rs2608041  | 8  | 129149171 | 0.0005122 | -0.08342 | 0.0004628 | .                |
| rs12953418 | 18 | 63895148  | 0.000513  | 0.06406  | 0.0005128 | .                |
| rs12970853 | 18 | 63894932  | 0.000513  | 0.06406  | 0.0005128 | .                |
| rs12971105 | 18 | 63895063  | 0.000513  | 0.06406  | 0.0005128 | .                |
| rs2710679  | 2  | 17811378  | 0.0005132 | -0.03576 | 0.0003903 | VSNL1(0)         |
| rs34070481 | 5  | 159410017 | 0.0005133 | 0.07914  | 0.0002894 | ADRA1B(+10kb)    |
| rs6048497  | 20 | 22984590  | 0.0005134 | 0.03517  | 0.0005234 | .                |
| rs9807706  | 18 | 10699873  | 0.0005134 | 0.04363  | 0.0004615 | FAM38B(+2.059kb) |
| rs34605051 | 2  | 86693826  | 0.0005156 | 0.04216  | 0.0005484 | JMJD1A(0)        |
| rs1869416  | 2  | 3250248   | 0.0005158 | 0.03123  | 0.0004037 | TSSC1(0)         |
| rs1247669  | 4  | 74447417  | 0.0005163 | 0.04914  | 0.0005461 | RASSF6(0)        |
| rs1104880  | 15 | 91147512  | 0.0005164 | -0.03097 | 0.0004825 | CRTC3(0)         |
| rs6084540  | 20 | 3962185   | 0.0005164 | 0.03467  | 0.0005318 | RNF24(0)         |
| rs2732243  | 18 | 73681011  | 0.0005166 | -0.05212 | 0.0004188 | .                |
| rs28660554 | 4  | 138100242 | 0.0005167 | -0.1087  | 0.0004662 | .                |
| rs2949066  | 2  | 36133016  | 0.0005168 | -0.0522  | 0.0005019 | .                |
| rs9975344  | 21 | 32735104  | 0.000517  | 0.03878  | 0.0004595 | TIAM1(0)         |
| rs9258550  | 6  | 29811876  | 0.0005171 | 0.05706  | 0.0002462 | HLA-G(+12.98kb)  |
| rs11022044 | 11 | 11821358  | 0.0005181 | -0.03927 | 0.0005203 | .                |
| rs35605998 | 18 | 63890578  | 0.0005181 | 0.06395  | 0.0005253 | .                |
| rs34073965 | 9  | 92124591  | 0.0005184 | -0.03349 | 0.0005095 | .                |

|            |    |           |           |          |           |                                  |
|------------|----|-----------|-----------|----------|-----------|----------------------------------|
| rs2938893  | 9  | 81096302  | 0.0005195 | 0.04113  | 0.0005431 | .                                |
| rs3807031  | 6  | 30033884  | 0.0005197 | -0.03834 | 0.0004636 | ZNRD1(+1.198kb) RNF39(-4.158kb)  |
| rs10151246 | 14 | 24151219  | 0.0005198 | 0.04157  | 0.0006265 | .                                |
| rs4539523  | 14 | 24151625  | 0.0005198 | 0.04157  | 0.0006265 | .                                |
| rs13283062 | 9  | 99112981  | 0.00052   | 0.07851  | 0.0003201 | SLC35D2(0)                       |
| rs35841749 | 18 | 73676064  | 0.0005212 | -0.05211 | 0.0004479 | .                                |
| rs707129   | 2  | 157190398 | 0.0005213 | -0.03498 | 0.0004734 | NR4A2(+1.111kb)                  |
| rs2998682  | 9  | 81104687  | 0.000522  | 0.04068  | 0.0005736 | .                                |
| rs1150147  | 2  | 157180785 | 0.0005222 | 0.06395  | 0.0005082 | NR4A2(-0.158kb)                  |
| rs12953460 | 18 | 63894646  | 0.0005222 | 0.06395  | 0.0005236 | .                                |
| rs12963029 | 18 | 63889687  | 0.0005222 | 0.06395  | 0.0005236 | .                                |
| rs12965609 | 18 | 63893875  | 0.0005222 | 0.06395  | 0.0005236 | .                                |
| rs12965991 | 18 | 63893917  | 0.0005222 | 0.06395  | 0.0005236 | .                                |
| rs12969678 | 18 | 63894217  | 0.0005222 | 0.06395  | 0.0005236 | .                                |
| rs35472657 | 18 | 63889479  | 0.0005222 | -0.03473 | 0.0005236 | .                                |
| rs3126209  | 1  | 204317623 | 0.0005233 | -0.03573 | 0.0003885 | PLEKHA6(0)                       |
| rs2128043  | 2  | 183116900 | 0.0005238 | 0.03211  | 0.0006324 | PDE1A(0)                         |
| rs17333933 | 1  | 204289780 | 0.0005239 | -0.03315 | 0.0003766 | PLEKHA6(0)                       |
| rs60963134 | 2  | 140752343 | 0.0005239 | 0.06162  | 0.0004266 | .                                |
| rs12962720 | 18 | 63820701  | 0.000524  | 0.0659   | 0.0005328 | .                                |
| rs1490968  | 18 | 63821402  | 0.000524  | 0.0659   | 0.0005328 | .                                |
| rs56918260 | 8  | 96591732  | 0.0005242 | 0.1277   | 0.0005283 | .                                |
| rs12529577 | 6  | 165551811 | 0.0005245 | -0.03957 | 0.0006006 | .                                |
| rs12529968 | 6  | 165551891 | 0.0005245 | -0.03957 | 0.0006006 | .                                |
| rs13193870 | 6  | 165551273 | 0.0005245 | -0.03957 | 0.0006006 | .                                |
| rs62442102 | 6  | 165551541 | 0.0005245 | -0.03957 | 0.0006006 | .                                |
| rs62442103 | 6  | 165551618 | 0.0005245 | -0.03957 | 0.0006006 | .                                |
| rs62442104 | 6  | 165551753 | 0.0005245 | -0.03957 | 0.0006006 | .                                |
| rs6888178  | 5  | 115042009 | 0.000525  | -0.07434 | 0.0004893 | .                                |
| rs10797739 | 1  | 181700838 | 0.0005259 | -0.04287 | 0.0004759 | CACNA1E(0)                       |
| rs6973520  | 7  | 128740443 | 0.0005265 | 0.03199  | 0.0008204 | .                                |
| rs12326909 | 18 | 10706827  | 0.0005269 | 0.03467  | 0.0004769 | FAM38B(+9.013kb)                 |
| rs4422103  | 2  | 212526145 | 0.0005273 | -0.03771 | 0.0004322 | ERBB4(0)                         |
| rs2268359  | 2  | 49205110  | 0.0005274 | -0.04983 | 0.0004848 | FSHR(0)                          |
| rs12447536 | 16 | 64681634  | 0.000529  | 0.03187  | 0.0004026 | .                                |
| rs11732361 | 4  | 153135872 | 0.0005292 | -0.0481  | 0.0004796 | .                                |
| rs12466584 | 2  | 195827760 | 0.0005295 | -0.05089 | 0.0004848 | .                                |
| rs570859   | 20 | 56823783  | 0.0005298 | 0.03427  | 0.0008454 | .                                |
| rs12961991 | 18 | 63871398  | 0.0005311 | 0.06369  | 0.0005526 | .                                |
| rs12962121 | 18 | 63871506  | 0.0005311 | 0.06369  | 0.0005526 | .                                |
| rs6823950  | 4  | 47364797  | 0.0005311 | 0.03258  | 0.0003555 | GABRB1(0)                        |
| rs503050   | 4  | 130133331 | 0.0005317 | -0.03834 | 0.0005843 | .                                |
| rs10805161 | 4  | 47967707  | 0.0005318 | 0.0371   | 0.0005234 | CNGA1(+12.98kb)                  |
| rs6802483  | 3  | 89218488  | 0.0005318 | -0.0387  | 0.0006243 | EPHA3(0)                         |
| rs9261509  | 6  | 30112906  | 0.000532  | -0.03576 | 0.000439  | TRIM15(-18.08kb) TRIM40(0) TRIM1 |
| rs9543272  | 13 | 73786309  | 0.0005323 | -0.06938 | 0.0007971 | .                                |
| rs6928419  | 6  | 137215553 | 0.0005328 | 0.1392   | 0.0005113 | PEX7(0)                          |

|            |    |           |           |          |           |                                   |
|------------|----|-----------|-----------|----------|-----------|-----------------------------------|
| rs10012820 | 4  | 110161593 | 0.0005331 | -0.03232 | 0.0004959 | COL25A1(0)                        |
| rs2905925  | 16 | 64704250  | 0.0005334 | 0.03215  | 0.0003903 | .                                 |
| rs5006659  | 4  | 136142358 | 0.0005339 | -0.03184 | 0.0004084 | .                                 |
| rs12417751 | 11 | 72031480  | 0.000534  | 0.1496   | 0.0005026 | CLPB(0)                           |
| rs5020631  | 1  | 242842300 | 0.0005341 | 0.04143  | 0.0005756 | .                                 |
| rs1777310  | 10 | 29988053  | 0.0005349 | -0.03127 | 0.0005212 | SVIL(0)                           |
| rs17013551 | 2  | 127059923 | 0.0005352 | 0.04233  | 0.0006659 | .                                 |
| rs6070406  | 20 | 56858751  | 0.000536  | 0.03418  | 0.0008035 | .                                 |
| rs10519350 | 4  | 136111898 | 0.0005361 | 0.04479  | 0.0005625 | .                                 |
| rs12699333 | 7  | 12269804  | 0.0005364 | -0.03148 | 0.0004852 | TMEM106B(0)                       |
| rs11639526 | 16 | 9883002   | 0.0005384 | -0.03343 | 0.0004447 | GRIN2A(0)                         |
| rs4694875  | 4  | 47920328  | 0.0005385 | -0.03849 | 0.0005179 | NFXL1(+3.695kb) CNGA1(-17.66kb)   |
| rs850734   | 17 | 42449025  | 0.0005386 | 0.03255  | 0.0003952 | ITGA2B(-0.524kb) GRN(+18.55kb)    |
| rs17085709 | 6  | 155160436 | 0.0005391 | -0.05048 | 0.0003591 | RBM16(+5.242kb)                   |
| rs555465   | 11 | 65468808  | 0.0005392 | -0.03016 | 0.0004397 | RNASEH2C(-16.34kb) KAT5(-10.68kb) |
| rs1049493  | 15 | 68480887  | 0.0005398 | -0.03112 | 0.0004909 | PIAS1(+0.483kb) CLN6(-18.44kb) C  |
| rs1378349  | 4  | 63397241  | 0.0005406 | -0.04615 | 0.0004264 | .                                 |
| rs7214863  | 17 | 7274077   | 0.0005414 | -0.03511 | 0.0005545 | TNK1(-10.29kb) TMEM95(+13.54kb)   |
| rs61547860 | 2  | 86768170  | 0.0005415 | 0.04203  | 0.0005754 | VPS24(0)                          |
| rs13133844 | 4  | 136141885 | 0.0005418 | -0.05357 | 0.0004309 | .                                 |
| rs17187638 | 1  | 208779197 | 0.0005418 | -0.03191 | 0.0004864 | .                                 |
| rs12240802 | 10 | 81077765  | 0.000542  | 0.06645  | 0.0007073 | ZMIZ1(+1.492kb)                   |
| rs2367852  | 3  | 193473257 | 0.0005422 | 0.03913  | 0.0005995 | .                                 |
| rs4502537  | 3  | 193473880 | 0.0005422 | 0.03913  | 0.0005995 | .                                 |
| rs6544772  | 2  | 45065096  | 0.0005424 | -0.03062 | 0.0005145 | .                                 |
| rs7347231  | 20 | 42331846  | 0.0005427 | -0.0569  | 0.0004023 | MYBL2(0)                          |
| rs11134596 | 5  | 169307075 | 0.000543  | -0.03077 | 0.000599  | LOC100131897(0) DOCK2(0)          |
| rs11740057 | 5  | 169304925 | 0.000543  | -0.03077 | 0.000599  | LOC100131897(0) DOCK2(0)          |
| rs35642329 | 8  | 57539326  | 0.0005435 | 0.04455  | 0.0004112 | .                                 |
| rs56185703 | 6  | 144967331 | 0.0005438 | -0.04093 | 0.0005346 | UTRN(0)                           |
| rs228667   | 1  | 7869380   | 0.000544  | -0.04909 | 0.0005113 | PER3(0)                           |
| rs228671   | 1  | 7870418   | 0.000544  | -0.04909 | 0.0005113 | PER3(0)                           |
| rs9295830  | 6  | 30044986  | 0.0005442 | -0.03835 | 0.0004838 | ZNRD1(+12.3kb) RNF39(+1.358kb) P  |
| rs12240447 | 10 | 81077430  | 0.0005443 | 0.06648  | 0.0007041 | ZMIZ1(+1.157kb)                   |
| rs4953137  | 2  | 45063235  | 0.000545  | -0.03068 | 0.0005184 | .                                 |
| rs7695392  | 4  | 189573257 | 0.0005452 | -0.04119 | 0.0005016 | .                                 |
| rs12668625 | 7  | 12269817  | 0.0005462 | -0.03144 | 0.000493  | TMEM106B(0)                       |
| rs881990   | 10 | 99859653  | 0.0005465 | -0.03137 | 0.000465  | .                                 |
| rs7025721  | 9  | 15031488  | 0.0005473 | -0.04795 | 0.0007    | .                                 |
| rs3800568  | 7  | 47857982  | 0.0005478 | -0.03059 | 0.0004754 | PKD1L1(0) FLJ21075(0)             |
| rs13286011 | 9  | 99254394  | 0.0005488 | 0.09459  | 0.0002968 | HABP4(+0.776kb) CDC14B(-8kb)      |
| rs10091531 | 8  | 143202330 | 0.0005489 | 0.03175  | 0.000505  | .                                 |
| rs7488735  | 12 | 20667161  | 0.0005489 | -0.03343 | 0.0005241 | PDE3A(0)                          |
| rs354599   | 5  | 77134397  | 0.0005492 | -0.04086 | 0.0005357 | .                                 |
| rs60923631 | 16 | 77783369  | 0.0005498 | 0.05319  | 0.000569  | NUDT7(+7.215kb)                   |
| rs6855296  | 4  | 114150875 | 0.0005498 | 0.03679  | 0.0006674 | ANK2(0)                           |
| rs57422306 | 16 | 69383897  | 0.00055   | 0.05886  | 0.0004045 | TMED6(0) TERF2(-5.635kb) PDF(+19  |

|            |    |           |           |          |           |                                  |
|------------|----|-----------|-----------|----------|-----------|----------------------------------|
| rs60722751 | 6  | 141131530 | 0.0005501 | 0.04639  | 0.000622  | .                                |
| rs9843199  | 3  | 89196136  | 0.0005503 | 0.03805  | 0.0006422 | EPHA3(0)                         |
| rs228674   | 1  | 7874975   | 0.0005515 | -0.04902 | 0.0005205 | PER3(0)                          |
| rs9956172  | 18 | 50520008  | 0.0005515 | 0.0453   | 0.000583  | DCC(0)                           |
| rs13406807 | 2  | 85854476  | 0.0005517 | -0.03206 | 0.0004882 | USP39(0) C2orf68(+15.32kb)       |
| rs222616   | 14 | 24120270  | 0.000552  | 0.03211  | 0.0005058 | DHRS2(+5.422kb)                  |
| rs1476573  | 6  | 29674648  | 0.0005521 | 0.03285  | 0.0004989 | HLA-F(-16.47kb)                  |
| rs1548191  | 2  | 156503425 | 0.0005528 | 0.03348  | 0.0005364 | .                                |
| rs13415749 | 2  | 3257163   | 0.0005535 | -0.08109 | 0.0004348 | TSSC1(0)                         |
| rs61880601 | 11 | 45536331  | 0.0005535 | 0.03103  | 0.0004879 | .                                |
| rs9375933  | 6  | 133260475 | 0.0005535 | 0.04902  | 0.0006818 | .                                |
| rs1037267  | 13 | 42775846  | 0.0005541 | 0.04326  | 0.0005929 | DGKH(0)                          |
| rs1037268  | 13 | 42775932  | 0.0005541 | 0.04326  | 0.0005929 | DGKH(0)                          |
| rs4942098  | 13 | 42774961  | 0.0005541 | 0.04326  | 0.0005929 | DGKH(0)                          |
| rs34771484 | 20 | 42334170  | 0.0005544 | -0.05685 | 0.0004076 | MYBL2(0)                         |
| rs4921283  | 5  | 159870611 | 0.0005547 | -0.0306  | 0.0005944 | PTTG1(+14.87kb)                  |
| rs2648831  | 8  | 129150636 | 0.0005548 | -0.03306 | 0.0005144 | .                                |
| rs6703598  | 1  | 204291783 | 0.0005548 | -0.07879 | 0.0004239 | PLEKHA6(0)                       |
| rs12588330 | 14 | 68886394  | 0.0005551 | -0.03359 | 0.0003871 | RAD51L1(0)                       |
| rs11655816 | 17 | 71008921  | 0.0005552 | -0.07407 | 0.0005402 | SLC39A11(0)                      |
| rs8105287  | 19 | 12730391  | 0.0005559 | 0.03249  | 0.0006459 | ZNF791(0) ZNF490(+8.796kb)       |
| rs7977635  | 12 | 47421358  | 0.0005561 | 0.0631   | 0.0005659 | .                                |
| rs9767496  | 6  | 169493838 | 0.0005563 | 0.05221  | 0.0007443 | .                                |
| rs12435006 | 14 | 68887123  | 0.0005565 | -0.03343 | 0.0004052 | RAD51L1(0)                       |
| rs4902580  | 14 | 68887568  | 0.0005565 | -0.03343 | 0.0004052 | RAD51L1(0)                       |
| rs6848790  | 4  | 47365544  | 0.0005566 | 0.03139  | 0.0004659 | GABRB1(0)                        |
| rs2099185  | 2  | 183378186 | 0.0005569 | -0.0312  | 0.0006788 | PDE1A(0)                         |
| rs1861191  | 16 | 9908066   | 0.0005572 | -0.0349  | 0.0005336 | GRIN2A(0)                        |
| rs11962594 | 6  | 69986533  | 0.0005574 | 0.05724  | 0.0005856 | BAI3(0)                          |
| rs13034207 | 2  | 240541263 | 0.0005578 | -0.04529 | 0.00072   | .                                |
| rs4834324  | 4  | 114147402 | 0.0005578 | 0.03694  | 0.0006661 | ANK2(0)                          |
| rs7614769  | 3  | 193479542 | 0.0005582 | 0.03896  | 0.0006311 | .                                |
| rs170838   | 5  | 122454845 | 0.0005585 | 0.04327  | 0.0005197 | .                                |
| rs2919879  | 2  | 88370652  | 0.0005585 | 0.03675  | 0.000464  | SMYD1(0) KRCC1(+15.4kb)          |
| rs55913412 | 7  | 127966509 | 0.0005587 | -0.03434 | 0.000558  | RBM28(0)                         |
| rs8098121  | 18 | 38956679  | 0.0005587 | 0.06326  | 0.0007094 | .                                |
| rs708382   | 17 | 42442344  | 0.0005588 | 0.03115  | 0.0004722 | ITGA2B(-7.205kb) GRN(+11.87kb)   |
| rs16883531 | 5  | 54197347  | 0.0005591 | 0.09925  | 0.0005756 | .                                |
| rs1902786  | 8  | 129217810 | 0.0005591 | -0.05461 | 0.0005113 | .                                |
| rs2077319  | 14 | 22115884  | 0.0005593 | 0.03181  | 0.0005625 | OR4E2(-17.41kb) OR10G2(+12.89kb) |
| rs4663589  | 2  | 236385181 | 0.0005594 | 0.03217  | 0.0006317 | CENTG2(-17.55kb)                 |
| rs1532416  | 5  | 7103288   | 0.0005595 | -0.03187 | 0.0004373 | .                                |
| rs10179098 | 2  | 62862587  | 0.0005598 | 0.03795  | 0.0007081 | .                                |
| rs10461075 | 4  | 47975494  | 0.0005598 | -0.03853 | 0.0005502 | .                                |
| rs7800170  | 7  | 136624320 | 0.00056   | 0.03145  | 0.0006652 | CHRM2(0)                         |
| rs2300215  | 20 | 3967623   | 0.0005601 | 0.03566  | 0.0005524 | RNF24(0)                         |
| rs4949074  | 16 | 64643902  | 0.000562  | 0.03134  | 0.0004394 | .                                |



|            |    |           |           |          |           |                                  |
|------------|----|-----------|-----------|----------|-----------|----------------------------------|
| rs988869   | 5  | 7116830   | 0.000562  | -0.03675 | 0.0004747 | .                                |
| rs253000   | 5  | 160746488 | 0.0005624 | -0.0364  | 0.0006982 | GABRB2(0)                        |
| rs6840951  | 4  | 14444074  | 0.0005632 | 0.04331  | 0.0005847 | .                                |
| rs62073709 | 17 | 16580332  | 0.0005638 | 0.05834  | 0.0005785 | CCDC144A(-13.31kb)               |
| rs6778737  | 3  | 64336268  | 0.0005638 | 0.07124  | 0.0007622 | .                                |
| rs35874206 | 16 | 70720630  | 0.0005639 | -0.03092 | 0.0005605 | VAC14(-0.711kb) ABBA-1(+0.676kb) |
| rs9807946  | 2  | 102946111 | 0.0005641 | 0.03011  | 0.0005313 | IL1RL1(0)                        |
| rs12956559 | 18 | 63886655  | 0.0005644 | 0.06346  | 0.0005804 | .                                |
| rs62411747 | 4  | 14553336  | 0.0005644 | 0.04128  | 0.0006009 | .                                |
| rs7194049  | 16 | 73737459  | 0.0005658 | 0.04697  | 0.000644  | .                                |
| rs10405693 | 19 | 45326664  | 0.000566  | -0.03276 | 0.0007258 | BCAM(+1.986kb)                   |
| rs1908719  | 5  | 7106171   | 0.0005665 | -0.03159 | 0.0004409 | .                                |
| rs7008776  | 8  | 57520152  | 0.0005667 | 0.04406  | 0.000425  | .                                |
| rs2300438  | 2  | 49207067  | 0.0005671 | -0.04888 | 0.0005039 | FSHR(0)                          |
| rs17771703 | 8  | 57537217  | 0.0005674 | 0.04421  | 0.0004372 | .                                |
| rs17598471 | 13 | 42761399  | 0.0005675 | 0.04318  | 0.0006063 | DGKH(0)                          |
| rs17598648 | 13 | 42766316  | 0.0005675 | 0.04318  | 0.0006063 | DGKH(0)                          |
| rs55656510 | 13 | 42763533  | 0.0005675 | 0.04318  | 0.0006063 | DGKH(0)                          |
| rs61959255 | 13 | 42772186  | 0.0005675 | 0.04318  | 0.0006063 | DGKH(0)                          |
| rs9594699  | 13 | 42769563  | 0.0005675 | 0.04318  | 0.0006063 | DGKH(0)                          |
| rs9594703  | 13 | 42771885  | 0.0005675 | 0.04318  | 0.0006063 | DGKH(0)                          |
| rs4666851  | 2  | 183378875 | 0.0005679 | -0.03119 | 0.0006918 | PDE1A(0)                         |
| rs10483835 | 14 | 71484518  | 0.000568  | -0.04934 | 0.0004996 | PCNX(0)                          |
| rs9594705  | 13 | 42780915  | 0.0005681 | 0.04326  | 0.0006024 | DGKH(0)                          |
| rs61959235 | 13 | 42751847  | 0.0005683 | 0.04327  | 0.0006058 | DGKH(0)                          |
| rs189191   | 5  | 122453420 | 0.0005687 | 0.03723  | 0.0005548 | .                                |
| rs253003   | 5  | 160748674 | 0.0005691 | -0.03628 | 0.0006918 | GABRB2(0)                        |
| rs6758298  | 2  | 183379151 | 0.0005692 | -0.03115 | 0.0006927 | PDE1A(0)                         |
| rs10929725 | 2  | 11339199  | 0.0005693 | -0.03038 | 0.000498  | ROCK2(0)                         |
| rs6733603  | 2  | 183013947 | 0.0005694 | 0.0326   | 0.0006537 | PDE1A(0)                         |
| rs7225641  | 17 | 16560726  | 0.0005695 | 0.0416   | 0.0006444 | ZNF624(+3.568kb)                 |
| rs9908390  | 17 | 16561739  | 0.0005695 | 0.0416   | 0.0006444 | ZNF624(+4.581kb)                 |
| rs1030886  | 2  | 86755546  | 0.0005696 | 0.0417   | 0.0006101 | VPS24(0)                         |
| rs1030887  | 2  | 86755652  | 0.0005696 | 0.0417   | 0.0006101 | VPS24(0)                         |
| rs11548929 | 2  | 86756381  | 0.0005696 | 0.0417   | 0.0006101 | VPS24(0)                         |
| rs59895355 | 2  | 86801535  | 0.0005696 | 0.0417   | 0.0006101 | VPS24(+10.94kb)                  |
| rs60244636 | 2  | 86798114  | 0.0005696 | 0.0417   | 0.0006101 | VPS24(+7.514kb)                  |
| rs7604179  | 2  | 86765034  | 0.0005696 | 0.0417   | 0.0006101 | VPS24(0)                         |
| rs7608800  | 2  | 86769728  | 0.0005696 | 0.0417   | 0.0006101 | VPS24(0)                         |
| rs4809720  | 20 | 47341312  | 0.0005708 | 0.06183  | 0.0005921 | PREX1(0)                         |
| rs1623919  | 11 | 127884569 | 0.0005713 | -0.0378  | 0.0004152 | .                                |
| rs3010695  | 9  | 81098495  | 0.0005715 | 0.04032  | 0.0006351 | .                                |
| rs7139562  | 13 | 45335345  | 0.0005717 | -0.04831 | 0.0004058 | .                                |
| rs5006660  | 4  | 136142389 | 0.0005722 | -0.03174 | 0.0004339 | .                                |
| rs9594709  | 13 | 42794508  | 0.0005724 | 0.04291  | 0.0006147 | DGKH(0)                          |
| rs2284204  | 7  | 139620219 | 0.0005727 | 0.07656  | 0.0005758 | TBXAS1(0)                        |
| rs2194408  | 2  | 53543619  | 0.0005728 | -0.0319  | 0.0004159 | .                                |

|            |    |           |           |          |           |                                  |
|------------|----|-----------|-----------|----------|-----------|----------------------------------|
| rs10865333 | 2  | 62835586  | 0.0005741 | 0.03729  | 0.000727  | .                                |
| rs2040349  | 2  | 85889525  | 0.0005744 | -0.03241 | 0.000497  | USP39(+13.12kb) SFTPB(0)         |
| rs1604838  | 6  | 91616133  | 0.0005745 | 0.05402  | 0.0006536 | .                                |
| rs35069    | 12 | 31147441  | 0.0005745 | -0.0405  | 0.0004711 | TSPAN11(+1.986kb)                |
| rs12728172 | 1  | 91110248  | 0.0005749 | -0.03357 | 0.0006276 | .                                |
| rs2648843  | 8  | 129156334 | 0.000575  | -0.07902 | 0.0005467 | .                                |
| rs6830383  | 4  | 90745113  | 0.0005758 | 0.07223  | 0.0005813 | SNCA(0)                          |
| rs60126815 | 9  | 108209962 | 0.0005761 | 0.03282  | 0.0006388 | FSD1L(-0.362kb)                  |
| rs9261492  | 6  | 30110058  | 0.0005762 | -0.03583 | 0.0004601 | TRIM40(0) TRIM10(-9.665kb)       |
| rs1037272  | 13 | 42790458  | 0.0005774 | 0.04279  | 0.0006184 | DGKH(0)                          |
| rs3012519  | 6  | 74536510  | 0.0005776 | 0.05979  | 0.0006332 | CD109(0)                         |
| rs2064770  | 14 | 59500972  | 0.0005779 | 0.03089  | 0.0005492 | .                                |
| rs7191764  | 16 | 64688111  | 0.0005782 | 0.03161  | 0.0004441 | .                                |
| rs11170623 | 12 | 54028708  | 0.0005784 | -0.0403  | 0.0004095 | ATF7(+8.509kb)                   |
| rs1875989  | 5  | 26785720  | 0.000579  | -0.04254 | 0.0005497 | .                                |
| rs975020   | 11 | 112094487 | 0.000579  | -0.1019  | 0.0005288 | PTS(-2.6kb) BCO2(+4.838kb)       |
| rs7336254  | 13 | 102826455 | 0.0005794 | -0.03154 | 0.0006367 | FGF14(0)                         |
| rs7433757  | 3  | 89217329  | 0.0005794 | 0.03112  | 0.0006864 | EPHA3(0)                         |
| rs9673712  | 16 | 64629134  | 0.0005794 | 0.0368   | 0.0004505 | .                                |
| rs946801   | 1  | 208777749 | 0.0005803 | -0.05252 | 0.0005257 | .                                |
| rs6847600  | 4  | 47365733  | 0.0005804 | 0.03125  | 0.0004867 | GABRB1(0)                        |
| rs4809721  | 20 | 47353869  | 0.0005805 | 0.06328  | 0.0006126 | PREX1(0)                         |
| rs16958777 | 16 | 69381769  | 0.0005808 | 0.05864  | 0.0004245 | TMED6(0) TERF2(-7.763kb) PDF(+17 |
| rs55719951 | 6  | 165541043 | 0.0005808 | -0.03937 | 0.0006493 | .                                |
| rs311328   | 6  | 153137443 | 0.0005827 | 0.04249  | 0.0008066 | .                                |
| rs2411927  | 2  | 240536550 | 0.0005835 | -0.04571 | 0.0007568 | .                                |
| rs7664341  | 4  | 47361447  | 0.0005837 | 0.03124  | 0.0004878 | GABRB1(0)                        |
| rs61465748 | 2  | 86789525  | 0.0005844 | 0.04168  | 0.0006197 | VPS24(0)                         |
| rs11659591 | 18 | 10706069  | 0.0005848 | 0.03428  | 0.0005266 | FAM38B(+8.255kb)                 |
| rs11661941 | 18 | 10705935  | 0.0005848 | 0.03428  | 0.0005266 | FAM38B(+8.121kb)                 |
| rs4949395  | 1  | 31879284  | 0.0005849 | -0.03156 | 0.0007767 | SERINC2(-6.678kb)                |
| rs7569713  | 2  | 26294038  | 0.000585  | -0.122   | 0.0005939 | RAB10(0)                         |
| rs9654571  | 6  | 164773524 | 0.0005851 | 0.07325  | 0.0007178 | .                                |
| rs2836812  | 21 | 40361732  | 0.0005853 | 0.03162  | 0.0006308 | .                                |
| rs1430150  | 2  | 183383288 | 0.0005866 | -0.03204 | 0.0006477 | PDE1A(0)                         |
| rs3852199  | 5  | 106810945 | 0.0005866 | -0.1122  | 0.000541  | EFNA5(0)                         |
| rs12526446 | 6  | 165548973 | 0.0005868 | -0.04885 | 0.000667  | .                                |
| rs12526893 | 6  | 165549880 | 0.0005868 | -0.03927 | 0.000667  | .                                |
| rs12528187 | 6  | 165549223 | 0.0005868 | -0.03927 | 0.000667  | .                                |
| rs12528609 | 6  | 165549456 | 0.0005868 | -0.03927 | 0.000667  | .                                |
| rs12528642 | 6  | 165549648 | 0.0005868 | -0.03927 | 0.000667  | .                                |
| rs13209050 | 6  | 165551051 | 0.0005868 | -0.03927 | 0.000667  | .                                |
| rs228695   | 1  | 7884403   | 0.0005868 | -0.03927 | 0.0005519 | PER3(0)                          |
| rs34748873 | 6  | 165548666 | 0.0005868 | -0.03927 | 0.000667  | .                                |
| rs34835453 | 6  | 165548722 | 0.0005868 | -0.03927 | 0.000667  | .                                |
| rs35123846 | 6  | 165550540 | 0.0005868 | -0.03927 | 0.000667  | .                                |
| rs62442100 | 6  | 165550627 | 0.0005868 | -0.03927 | 0.000667  | .                                |

|            |    |           |           |          |           |                                   |
|------------|----|-----------|-----------|----------|-----------|-----------------------------------|
| rs62442101 | 6  | 165550780 | 0.0005868 | -0.03927 | 0.000667  | .                                 |
| rs7783894  | 7  | 47868327  | 0.0005871 | -0.03085 | 0.0005026 | PKD1L1(0) FLJ21075(+8.883kb)      |
| rs1274379  | 10 | 92286105  | 0.0005874 | -0.03053 | 0.000648  | .                                 |
| rs4942097  | 13 | 42773629  | 0.000588  | 0.04312  | 0.0006258 | DGKH(0)                           |
| rs11959005 | 5  | 115051892 | 0.0005882 | -0.07695 | 0.0005381 | .                                 |
| rs757263   | 6  | 30098323  | 0.0005882 | -0.03581 | 0.0004861 | TRIM40(-6.186kb) TRIM31(+17.46kb) |
| rs56169877 | 13 | 45347385  | 0.0005893 | -0.04955 | 0.0004807 | .                                 |
| rs218769   | 4  | 14428542  | 0.0005897 | 0.04798  | 0.0004524 | .                                 |
| rs3827956  | 18 | 10708106  | 0.0005903 | 0.03423  | 0.0005415 | FAM38B(+10.29kb)                  |
| rs7804736  | 7  | 12266867  | 0.0005903 | -0.03131 | 0.0005205 | TMEM106B(0)                       |
| rs57640212 | 4  | 23877086  | 0.0005904 | 0.07084  | 0.0006162 | PPARGC1A(0)                       |
| rs12795392 | 11 | 127883486 | 0.0005907 | 0.03192  | 0.0005329 | .                                 |
| rs58027666 | 3  | 122725706 | 0.000591  | -0.07536 | 0.0005601 | SEMA5B(0)                         |
| rs199980   | 1  | 181691962 | 0.0005917 | -0.04263 | 0.0005113 | CACNA1E(0)                        |
| rs6440096  | 3  | 142331360 | 0.0005917 | 0.04178  | 0.000646  | PLS1(-10.98kb)                    |
| rs1747825  | 1  | 197753136 | 0.0005922 | 0.03919  | 0.0007067 | DENND1B(+8.58kb)                  |
| rs4854155  | 2  | 3252294   | 0.0005929 | 0.03068  | 0.0005085 | TSSC1(0)                          |
| rs916674   | 16 | 26511086  | 0.0005929 | 0.03078  | 0.0006989 | .                                 |
| rs2165370  | 8  | 57520845  | 0.0005931 | 0.04333  | 0.0004592 | .                                 |
| rs7357058  | 6  | 19040119  | 0.0005933 | -0.03759 | 0.0008319 | .                                 |
| rs10876474 | 12 | 54043140  | 0.0005938 | -0.04022 | 0.0004197 | ATP5G2(-15.8kb)                   |
| rs7976278  | 12 | 54045121  | 0.0005938 | -0.04022 | 0.0004197 | ATP5G2(-13.82kb)                  |
| rs17216263 | 3  | 122719602 | 0.0005941 | -0.07749 | 0.0005409 | SEMA5B(0)                         |
| rs4692469  | 4  | 30552753  | 0.0005943 | 0.03058  | 0.0007404 | .                                 |
| rs7721888  | 5  | 127076616 | 0.0005948 | 0.1311   | 0.0005823 | .                                 |
| rs5744240  | 11 | 112027364 | 0.0005951 | -0.03266 | 0.0005959 | TEX12(-10.73kb) IL18(0) BCO2(-18  |
| rs12044614 | 1  | 204298123 | 0.0005952 | -0.03392 | 0.0004365 | PLEKHA6(0)                        |
| rs2422127  | 11 | 36069214  | 0.0005952 | 0.1412   | 0.0006018 | LDLRAD3(0)                        |
| rs6551400  | 3  | 89216001  | 0.0005963 | 0.03674  | 0.0007057 | EPHA3(0)                          |
| rs17486233 | 4  | 115787479 | 0.0005964 | 0.06173  | 0.000618  | NDST4(0)                          |
| rs58790065 | 4  | 23876445  | 0.0005965 | 0.07069  | 0.0006328 | PPARGC1A(0)                       |
| rs11931222 | 4  | 14418694  | 0.0005966 | 0.04895  | 0.0004502 | .                                 |
| rs17742759 | 7  | 131027214 | 0.000597  | 0.03676  | 0.0007238 | MKLN1(0)                          |
| rs10180959 | 2  | 49203670  | 0.0005977 | -0.04947 | 0.000552  | FSHR(0)                           |
| rs6909995  | 6  | 8113430   | 0.0005982 | -0.1528  | 0.0004774 | EEF1E1(+10.65kb)                  |
| rs2723644  | 11 | 6543017   | 0.0005989 | 0.03178  | 0.000698  | C11orf47(+0.927kb)                |
| rs11126350 | 2  | 26271523  | 0.000599  | -0.1218  | 0.0006069 | RAB10(0)                          |
| rs4665815  | 2  | 26295878  | 0.000599  | -0.1218  | 0.0006069 | RAB10(0)                          |
| rs9614967  | 22 | 45271733  | 0.0005992 | 0.06892  | 0.000614  | PHF21B(-5.308kb) LOC553158(+13.0  |
| rs13215765 | 6  | 165533455 | 0.0006    | -0.04882 | 0.0005601 | .                                 |
| rs228657   | 1  | 7895278   | 0.0006    | -0.03996 | 0.0005662 | UTS2(-12.4kb) PER3(0)             |
| rs1807304  | 11 | 63859751  | 0.0006002 | 0.03493  | 0.0008138 | MACROD1(0) FLRT1(-11.61kb)        |
| rs13395411 | 2  | 53548094  | 0.0006003 | -0.03143 | 0.0004491 | .                                 |
| rs9261490  | 6  | 30109831  | 0.0006003 | -0.0355  | 0.0004892 | TRIM40(0) TRIM10(-9.892kb)        |
| rs10492428 | 13 | 26281281  | 0.0006005 | 0.04823  | 0.0003734 | ATP8A2(0)                         |
| rs11687966 | 2  | 26242316  | 0.0006007 | -0.1217  | 0.0006091 | RAB10(-14.66kb)                   |
| rs2617490  | 5  | 160737856 | 0.0006007 | -0.03447 | 0.0006962 | GABRB2(0)                         |

|            |    |           |           |          |           |                                  |
|------------|----|-----------|-----------|----------|-----------|----------------------------------|
| rs12445196 | 16 | 53658887  | 0.0006009 | -0.0673  | 0.0004417 | RPGRIP1L(0)                      |
| rs536863   | 13 | 102829599 | 0.000601  | -0.03161 | 0.000663  | FGF14(0)                         |
| rs2239896  | 11 | 118983434 | 0.0006018 | -0.06273 | 0.0005064 | MIZF(-8.853kb) HMBS(+19.18kb) H2 |
| rs7757753  | 6  | 19024910  | 0.0006022 | -0.03751 | 0.0008327 | .                                |
| rs2452920  | 17 | 70949903  | 0.0006025 | -0.03198 | 0.0007526 | SLC39A11(0)                      |
| rs61791290 | 1  | 104755080 | 0.0006036 | 0.07844  | 0.0003664 | .                                |
| rs61791291 | 1  | 104755081 | 0.0006036 | 0.07844  | 0.0003664 | .                                |
| rs62297819 | 4  | 47363512  | 0.0006042 | 0.03223  | 0.000406  | GABRB1(0)                        |
| rs10851677 | 15 | 60629076  | 0.0006045 | -0.03091 | 0.000733  | ANXA2(-10.27kb)                  |
| rs6448722  | 4  | 30750957  | 0.000605  | 0.04195  | 0.0005888 | PCDH7(0)                         |
| rs7777539  | 7  | 47856825  | 0.0006052 | -0.03032 | 0.0005269 | PKD1L1(0) FLJ21075(0)            |
| rs6978674  | 7  | 77859611  | 0.0006055 | 0.03039  | 0.0006714 | MAGI2(0)                         |
| rs7792410  | 7  | 12267614  | 0.0006058 | -0.0312  | 0.0005379 | TMEM106B(0)                      |
| rs4513011  | 14 | 22187584  | 0.0006062 | -0.03332 | 0.0005813 | .                                |
| rs11044404 | 12 | 19216043  | 0.0006067 | 0.1393   | 0.000597  | .                                |
| rs13227214 | 7  | 128740355 | 0.0006072 | 0.03197  | 0.0008933 | .                                |
| rs11735884 | 4  | 30543967  | 0.0006073 | -0.03038 | 0.0008217 | .                                |
| rs2144637  | 20 | 11573224  | 0.0006077 | 0.04821  | 0.0006583 | .                                |
| rs4424266  | 8  | 51557513  | 0.0006086 | -0.04493 | 0.0005642 | SNTG1(0)                         |
| rs228646   | 1  | 7866915   | 0.0006088 | -0.04871 | 0.0005653 | PER3(0)                          |
| rs6919623  | 6  | 70000505  | 0.000609  | 0.05172  | 0.0006135 | BAI3(0)                          |
| rs11119147 | 1  | 209058570 | 0.0006094 | -0.06663 | 0.0005613 | .                                |
| rs9261496  | 6  | 30111014  | 0.00061   | -0.03544 | 0.0004955 | TRIM15(-19.97kb) TRIM40(0) TRIM1 |
| rs2097824  | 16 | 74015948  | 0.0006102 | -0.03425 | 0.0007083 | .                                |
| rs11727800 | 4  | 153135419 | 0.0006103 | -0.04762 | 0.0005535 | .                                |
| rs6570423  | 6  | 141141957 | 0.0006103 | 0.06085  | 0.0006243 | .                                |
| rs6719969  | 2  | 26253921  | 0.0006106 | -0.1216  | 0.0006194 | RAB10(-3.052kb)                  |
| rs10161319 | 12 | 54036314  | 0.0006124 | -0.0404  | 0.0004248 | ATF7(+16.11kb)                   |
| rs453762   | 5  | 62593131  | 0.0006128 | 0.03458  | 0.0003225 | .                                |
| rs9847445  | 3  | 142338536 | 0.0006133 | 0.04195  | 0.0006508 | PLS1(-3.807kb)                   |
| rs2938890  | 9  | 81098348  | 0.0006136 | 0.05241  | 0.0006466 | .                                |
| rs4888676  | 16 | 77783896  | 0.0006136 | 0.04174  | 0.0006422 | NUDT7(+7.742kb)                  |
| rs9482418  | 6  | 123951730 | 0.0006145 | -0.07413 | 0.0005181 | TRDN(0)                          |
| rs9490841  | 6  | 123951245 | 0.0006145 | -0.07413 | 0.0005181 | TRDN(0)                          |
| rs7257939  | 19 | 12729096  | 0.0006147 | 0.03232  | 0.0007111 | ZNF791(0) ZNF490(+7.501kb)       |
| rs6500116  | 16 | 60396537  | 0.0006148 | 0.03631  | 0.0006665 | .                                |
| rs3010697  | 9  | 81102717  | 0.0006161 | 0.04006  | 0.0006613 | .                                |
| rs1741688  | 6  | 117273445 | 0.000617  | 0.03543  | 0.0006766 | .                                |
| rs170631   | 1  | 7852117   | 0.0006172 | -0.05029 | 0.0005864 | VAMP3(+10.62kb) PER3(0)          |
| rs28642929 | 15 | 60620739  | 0.0006172 | -0.03094 | 0.0007421 | ANXA2(-18.61kb)                  |
| rs12528341 | 6  | 165553730 | 0.0006177 | 0.07162  | 0.0007035 | .                                |
| rs7184190  | 16 | 79807496  | 0.0006177 | -0.03893 | 0.0006298 | .                                |
| rs10179654 | 2  | 102921783 | 0.0006182 | 0.02971  | 0.0005376 | IL1RL1(-6.178kb)                 |
| rs12476968 | 2  | 102924662 | 0.0006182 | 0.02971  | 0.0005376 | IL1RL1(-3.299kb)                 |
| rs4090473  | 2  | 102922987 | 0.0006182 | 0.02971  | 0.0005376 | IL1RL1(-4.974kb)                 |
| rs7568913  | 2  | 102920037 | 0.0006182 | 0.02971  | 0.0005376 | IL1RL1(-7.924kb)                 |
| rs7138975  | 12 | 19212287  | 0.0006189 | 0.1393   | 0.0006019 | .                                |

|            |    |           |           |          |           |                                   |
|------------|----|-----------|-----------|----------|-----------|-----------------------------------|
| rs9857567  | 3  | 142340201 | 0.0006192 | 0.04188  | 0.0006599 | PLS1(-2.142kb)                    |
| rs9862686  | 3  | 142341201 | 0.0006192 | 0.04188  | 0.0006599 | PLS1(-1.142kb)                    |
| rs12105874 | 2  | 212527374 | 0.0006202 | -0.03704 | 0.0005059 | ERBB4(0)                          |
| rs4721057  | 7  | 12267221  | 0.0006203 | -0.03105 | 0.0005574 | TMEM106B(0)                       |
| rs3742914  | 14 | 70498407  | 0.0006207 | -0.1257  | 0.0005939 | SMOC1(0) SLC8A3(-12.53kb)         |
| rs7727697  | 5  | 169307752 | 0.0006212 | -0.03051 | 0.0006827 | LOC100131897(0) DOCK2(0)          |
| rs9562572  | 13 | 45340351  | 0.0006213 | -0.04637 | 0.0004456 | .                                 |
| rs11147869 | 13 | 42754732  | 0.0006219 | 0.04292  | 0.0006647 | DGKH(0)                           |
| rs12431373 | 13 | 42756477  | 0.0006219 | 0.04292  | 0.0006647 | DGKH(0)                           |
| rs55955633 | 16 | 69357264  | 0.0006219 | 0.05813  | 0.0004459 | VPS4A(0) TMED6(-19.89kb) SNTB2(+) |
| rs9490840  | 6  | 123950218 | 0.0006219 | -0.07403 | 0.0005261 | TRDN(0)                           |
| rs9492631  | 6  | 130844635 | 0.0006221 | -0.03916 | 0.0008184 | .                                 |
| rs1966742  | 8  | 57521787  | 0.0006225 | 0.04314  | 0.0004848 | .                                 |
| rs2302634  | 7  | 12270770  | 0.0006228 | -0.0314  | 0.0005403 | TMEM106B(0)                       |
| rs1903345  | 4  | 136176881 | 0.0006229 | -0.03126 | 0.0004668 | .                                 |
| rs34216879 | 7  | 77859821  | 0.0006229 | 0.03032  | 0.0006905 | MAGI2(0)                          |
| rs10204426 | 2  | 85903908  | 0.000623  | 0.03095  | 0.0005512 | SFTPB(+8.596kb) GNLY(-17.5kb)     |
| rs6969722  | 7  | 12278437  | 0.0006233 | -0.03357 | 0.0005832 | TMEM106B(+1.554kb)                |
| rs2873513  | 8  | 57521964  | 0.0006234 | 0.04356  | 0.0004758 | .                                 |
| rs13381300 | 18 | 2572095   | 0.0006242 | 0.06152  | 0.0004209 | NDC80(0) METTL4(+0.606kb)         |
| rs650275   | 2  | 17722654  | 0.0006242 | -0.03399 | 0.0004379 | VSNL1(0)                          |
| rs12127974 | 1  | 91112739  | 0.0006244 | -0.03355 | 0.0007231 | .                                 |
| rs1855386  | 13 | 88769872  | 0.0006246 | -0.03338 | 0.0004277 | .                                 |
| rs7528187  | 1  | 91111343  | 0.0006246 | -0.04213 | 0.0006858 | .                                 |
| rs17710832 | 7  | 47868006  | 0.0006251 | -0.03062 | 0.0005397 | PKD1L1(0) FLJ21075(+8.562kb)      |
| rs10870055 | 9  | 80760371  | 0.0006255 | -0.1423  | 0.0006174 | .                                 |
| rs3769710  | 2  | 99153756  | 0.0006256 | -0.04931 | 0.0009386 | INPP4A(0)                         |
| rs7987665  | 13 | 45347395  | 0.0006256 | -0.04322 | 0.0005122 | .                                 |
| rs28378300 | 3  | 142333064 | 0.0006258 | 0.04191  | 0.0006644 | PLS1(-9.279kb)                    |
| rs28647471 | 3  | 142333164 | 0.0006258 | 0.04191  | 0.0006644 | PLS1(-9.179kb)                    |
| rs4398471  | 3  | 142333969 | 0.0006258 | 0.04191  | 0.0006644 | PLS1(-8.374kb)                    |
| rs7638338  | 3  | 142334730 | 0.0006258 | 0.04191  | 0.0006644 | PLS1(-7.613kb)                    |
| rs4953652  | 2  | 49198512  | 0.0006259 | -0.0492  | 0.0005719 | FSHR(0)                           |
| rs2877475  | 14 | 68823119  | 0.0006262 | -0.03953 | 0.0004509 | RAD51L1(0)                        |
| rs10402524 | 19 | 45329344  | 0.0006263 | -0.03306 | 0.0008037 | BCAM(+4.666kb)                    |
| rs29354    | 4  | 114209963 | 0.0006264 | 0.03337  | 0.0007076 | ANK2(0)                           |
| rs6660437  | 1  | 204274256 | 0.0006268 | -0.03033 | 0.0006609 | PLEKHA6(0)                        |
| rs12302291 | 12 | 54051310  | 0.0006269 | -0.04864 | 0.000443  | ATP5G2(-7.633kb)                  |
| rs228697   | 1  | 7887579   | 0.0006269 | -0.04864 | 0.000582  | PER3(0)                           |
| rs228699   | 1  | 7888169   | 0.0006269 | -0.04005 | 0.000582  | UTS2(-19.5kb) PER3(0)             |
| rs10810215 | 9  | 14683341  | 0.0006274 | -0.0314  | 0.0005988 | ZDHHC21(0)                        |
| rs1611362  | 6  | 29679471  | 0.0006275 | 0.03282  | 0.0005639 | HLA-F(-11.64kb)                   |
| rs3927501  | 13 | 73784035  | 0.0006276 | -0.06793 | 0.0008989 | .                                 |
| rs17550508 | 1  | 194048035 | 0.0006278 | -0.04856 | 0.0008121 | .                                 |
| rs5911     | 17 | 42453065  | 0.0006281 | 0.03205  | 0.0004601 | ITGA2B(0) GPATCH8(-19.58kb)       |
| rs10810035 | 9  | 13787648  | 0.0006285 | -0.03335 | 0.0005285 | .                                 |
| rs28709617 | 3  | 142332635 | 0.0006286 | 0.04198  | 0.0006616 | PLS1(-9.708kb)                    |

|            |    |           |           |          |           |                               |
|------------|----|-----------|-----------|----------|-----------|-------------------------------|
| rs6084541  | 20 | 3962731   | 0.0006289 | 0.03407  | 0.0006487 | RNF24(0)                      |
| rs2252097  | 1  | 195538416 | 0.0006293 | 0.03096  | 0.0009442 | .                             |
| rs7121240  | 11 | 6552292   | 0.00063   | 0.03129  | 0.0008276 | C11orf47(+10.2kb)             |
| rs13382326 | 2  | 1998275   | 0.0006302 | -0.07806 | 0.0008998 | MYT1L(0)                      |
| rs2812309  | 9  | 108236362 | 0.0006303 | 0.03229  | 0.0006799 | FSD1L(0)                      |
| rs5011432  | 7  | 12268668  | 0.0006305 | -0.03121 | 0.0005609 | TMEM106B(0)                   |
| rs2402890  | 7  | 127977352 | 0.0006309 | 0.06281  | 0.0006286 | RBM28(0) LOC401399(-13.03kb)  |
| rs34994484 | 1  | 223870714 | 0.0006311 | -0.07669 | 0.0005838 | .                             |
| rs61839706 | 1  | 242825502 | 0.0006313 | 0.041    | 0.0006781 | .                             |
| rs2224644  | 6  | 169491266 | 0.0006314 | 0.05203  | 0.0008254 | .                             |
| rs16867968 | 4  | 30753673  | 0.0006323 | 0.04173  | 0.0006291 | PCDH7(0)                      |
| rs17027296 | 2  | 86790716  | 0.0006325 | 0.04156  | 0.000673  | VPS24(+0.116kb)               |
| rs10900218 | 10 | 45961422  | 0.0006331 | -0.03496 | 0.0004436 | MARCH8(0) ALOX5(+19.86kb)     |
| rs2402181  | 5  | 15786586  | 0.0006331 | -0.06185 | 0.0008931 | FBXL7(0)                      |
| rs12620461 | 2  | 8262588   | 0.0006333 | 0.04098  | 0.0009797 | .                             |
| rs9482416  | 6  | 123951153 | 0.0006337 | -0.07656 | 0.0005363 | TRDN(0)                       |
| rs35672793 | 19 | 12731178  | 0.0006346 | 0.03236  | 0.0007136 | ZNF791(0) ZNF490(+9.583kb)    |
| rs28876832 | 4  | 138097239 | 0.0006352 | 0.04179  | 0.000573  | .                             |
| rs62072853 | 17 | 16518653  | 0.0006352 | -0.1356  | 0.0008    | ZNF624(-5.394kb)              |
| rs28437402 | 15 | 60629172  | 0.0006355 | -0.0308  | 0.0007653 | ANXA2(-10.18kb)               |
| rs4888672  | 16 | 77783666  | 0.0006358 | 0.05239  | 0.000657  | NUDT7(+7.512kb)               |
| rs13160915 | 5  | 72525986  | 0.0006363 | 0.03302  | 0.0005788 | .                             |
| rs13177504 | 5  | 124461838 | 0.0006364 | 0.07031  | 0.0006279 | .                             |
| rs7496805  | 15 | 67077658  | 0.0006372 | 0.07917  | 0.0006135 | SMAD6(+3.332kb)               |
| rs7853195  | 9  | 97685298  | 0.0006372 | 0.03172  | 0.0006592 | C9orf3(0)                     |
| rs9490844  | 6  | 123957623 | 0.0006376 | -0.07554 | 0.0005534 | TRDN(0)                       |
| rs170632   | 1  | 7857432   | 0.0006379 | -0.04852 | 0.0005928 | VAMP3(+15.94kb) PER3(0)       |
| rs228685   | 1  | 7857974   | 0.0006379 | -0.04852 | 0.0005928 | VAMP3(+16.48kb) PER3(0)       |
| rs1378347  | 4  | 63397365  | 0.0006381 | -0.04542 | 0.0005079 | .                             |
| rs893338   | 2  | 240552564 | 0.0006382 | -0.03732 | 0.000735  | .                             |
| rs8013476  | 14 | 22187832  | 0.0006384 | -0.03289 | 0.0006359 | .                             |
| rs2011536  | 4  | 30543224  | 0.0006392 | -0.03036 | 0.0008275 | .                             |
| rs475379   | 5  | 152863738 | 0.0006394 | 0.08757  | 0.0005963 | GRIA1(-6.345kb)               |
| rs513046   | 5  | 152861959 | 0.0006394 | 0.08757  | 0.0005963 | GRIA1(-8.124kb)               |
| rs516633   | 5  | 152849856 | 0.0006394 | 0.08757  | 0.0005963 | .                             |
| rs520730   | 5  | 152859682 | 0.0006394 | 0.08757  | 0.0005963 | GRIA1(-10.4kb)                |
| rs541544   | 5  | 152858887 | 0.0006394 | 0.08757  | 0.0005963 | GRIA1(-11.2kb)                |
| rs561961   | 5  | 152864054 | 0.0006394 | 0.08757  | 0.0005963 | GRIA1(-6.029kb)               |
| rs576969   | 5  | 152865308 | 0.0006394 | 0.08757  | 0.0005963 | GRIA1(-4.775kb)               |
| rs17619717 | 2  | 63943257  | 0.0006395 | -0.03052 | 0.0005704 | .                             |
| rs1148226  | 10 | 29970252  | 0.0006396 | -0.03084 | 0.0006258 | SVIL(0)                       |
| rs7708829  | 5  | 169322197 | 0.0006399 | -0.0308  | 0.0007232 | LOC100131897(0) DOCK2(0)      |
| rs34617021 | 12 | 47446521  | 0.00064   | 0.06144  | 0.0006549 | .                             |
| rs35065745 | 12 | 47450611  | 0.00064   | 0.06144  | 0.0006549 | AMIGO2(-18.88kb)              |
| rs35224075 | 12 | 47445786  | 0.00064   | 0.06144  | 0.0006549 | .                             |
| rs35680983 | 1  | 204283519 | 0.0006401 | -0.03423 | 0.0004549 | PLEKHA6(0)                    |
| rs1233400  | 6  | 29537975  | 0.0006406 | -0.0405  | 0.0006348 | UBD(+10.27kb) OR2H2(-17.71kb) |

|            |    |           |           |          |           |                                   |
|------------|----|-----------|-----------|----------|-----------|-----------------------------------|
| rs10810212 | 9  | 14677538  | 0.0006408 | 0.04134  | 0.0006453 | ZDHC21(0)                         |
| rs59521243 | 2  | 86780582  | 0.0006408 | -0.03079 | 0.0006862 | VPS24(0)                          |
| rs12287757 | 11 | 127878016 | 0.0006414 | 0.03192  | 0.00076   | .                                 |
| rs1895319  | 5  | 159876589 | 0.0006417 | -0.03029 | 0.0007121 | .                                 |
| rs6511828  | 19 | 12745799  | 0.0006419 | 0.03325  | 0.0006881 | ZNF791(+5.123kb) MAN2B1(-11.52kb) |
| rs2897462  | 4  | 153102015 | 0.0006427 | -0.03338 | 0.0005685 | .                                 |
| rs12622342 | 2  | 62750220  | 0.0006435 | 0.04265  | 0.0006952 | TMEM17(+16.74kb)                  |
| rs2209515  | 13 | 42791579  | 0.0006435 | -0.03527 | 0.0006905 | DGKH(0)                           |
| rs12326919 | 18 | 10706845  | 0.0006436 | 0.03401  | 0.0005793 | FAM38B(+9.031kb)                  |
| rs16975239 | 18 | 10706903  | 0.0006436 | 0.03401  | 0.0005793 | FAM38B(+9.089kb)                  |
| rs1447363  | 4  | 30750408  | 0.0006442 | 0.04178  | 0.0006252 | PCDH7(0)                          |
| rs6708083  | 2  | 240559073 | 0.0006444 | -0.03704 | 0.0007365 | .                                 |
| rs2144915  | 14 | 50519948  | 0.0006448 | -0.03799 | 0.0005672 | .                                 |
| rs35643424 | 9  | 28209800  | 0.0006451 | -0.03074 | 0.0005942 | LINGO2(0)                         |
| rs4775261  | 15 | 60630902  | 0.0006451 | -0.04525 | 0.0007833 | ANXA2(-8.447kb)                   |
| rs1364779  | 11 | 127842867 | 0.0006457 | 0.03455  | 0.00088   | .                                 |
| rs228681   | 1  | 7854555   | 0.0006463 | -0.04846 | 0.0006016 | VAMP3(+13.06kb) PER3(0)           |
| rs17487076 | 7  | 101633261 | 0.0006467 | 0.03845  | 0.0006333 | CUX1(0)                           |
| rs10839576 | 11 | 6552107   | 0.0006468 | 0.03118  | 0.0008539 | C11orf47(+10.02kb)                |
| rs7123875  | 11 | 66239147  | 0.0006476 | -0.03233 | 0.0009169 | PELI3(0) DPP3(-8.732kb)           |
| rs4731549  | 7  | 128741913 | 0.0006484 | 0.03134  | 0.0009717 | .                                 |
| rs11562183 | 9  | 14683806  | 0.0006487 | -0.03127 | 0.0006159 | ZDHC21(0)                         |
| rs7779637  | 7  | 128742164 | 0.000649  | 0.03132  | 0.0009944 | .                                 |
| rs12476685 | 2  | 49187751  | 0.0006495 | -0.0494  | 0.0006173 | FSHR(-1.9kb)                      |
| rs6434719  | 2  | 195788224 | 0.0006504 | -0.04875 | 0.0005841 | .                                 |
| rs10171970 | 2  | 44856449  | 0.0006521 | 0.03117  | 0.0006356 | C2orf34(0)                        |
| rs7386394  | 8  | 143203666 | 0.0006521 | -0.03296 | 0.0005981 | .                                 |
| rs9934315  | 16 | 64665761  | 0.0006523 | 0.03086  | 0.0005223 | .                                 |
| rs42501    | 7  | 92786016  | 0.0006527 | 0.03114  | 0.000726  | SAMD9L(+8.336kb)                  |
| rs9261507  | 6  | 30112627  | 0.0006529 | -0.03529 | 0.0005269 | TRIM15(-18.36kb) TRIM40(0) TRIM1  |
| rs12828288 | 12 | 47429803  | 0.0006531 | 0.06136  | 0.0006663 | .                                 |
| rs2272395  | 3  | 10967739  | 0.0006534 | 0.03021  | 0.0008388 | SLC6A11(0)                        |
| rs12934281 | 16 | 9908376   | 0.0006542 | -0.03434 | 0.0006204 | GRIN2A(0)                         |
| rs10450794 | 12 | 68853791  | 0.0006548 | 0.04778  | 0.0007712 | .                                 |
| rs62073663 | 17 | 16540244  | 0.0006548 | 0.05733  | 0.0006888 | ZNF624(0)                         |
| rs1541324  | 6  | 30113471  | 0.0006554 | -0.03524 | 0.0005307 | TRIM15(-17.51kb) TRIM40(0) TRIM1  |
| rs2241990  | 8  | 402556    | 0.0006555 | -0.04513 | 0.0006404 | FBXO25(0)                         |
| rs2829243  | 21 | 26037504  | 0.0006558 | 0.05717  | 0.0008103 | .                                 |
| rs16884045 | 4  | 30753211  | 0.0006561 | 0.04165  | 0.00064   | PCDH7(0)                          |
| rs13388171 | 2  | 44871822  | 0.0006564 | 0.03095  | 0.0006787 | C2orf34(0)                        |
| rs2090808  | 6  | 141060406 | 0.0006568 | 0.03052  | 0.0008376 | .                                 |
| rs59340001 | 2  | 127045355 | 0.0006569 | 0.04162  | 0.0008201 | .                                 |
| rs2048932  | 2  | 156508589 | 0.0006573 | 0.03317  | 0.000645  | .                                 |
| rs28415626 | 4  | 170073812 | 0.0006574 | 0.04657  | 0.0008127 | SH3RF1(0)                         |
| rs35761730 | 4  | 170077060 | 0.0006574 | 0.04657  | 0.0008127 | SH3RF1(0)                         |
| rs3923986  | 1  | 204271914 | 0.0006578 | -0.0302  | 0.000716  | PLEKHA6(0)                        |
| rs28668902 | 7  | 101669509 | 0.0006579 | 0.04161  | 0.0008466 | CUX1(0)                           |

|            |    |           |           |          |           |                                  |
|------------|----|-----------|-----------|----------|-----------|----------------------------------|
| rs9261502  | 6  | 30111610  | 0.0006585 | -0.03527 | 0.0005315 | TRIM15(-19.37kb) TRIM40(0) TRIM1 |
| rs61640358 | 6  | 123954397 | 0.0006587 | -0.05305 | 0.0005378 | TRDN(0)                          |
| rs7276594  | 21 | 41288453  | 0.0006587 | -0.07573 | 0.000554  | PCP4(0)                          |
| rs1420042  | 16 | 9914014   | 0.0006589 | -0.0346  | 0.0006279 | GRIN2A(0)                        |
| rs1012650  | 16 | 26511546  | 0.0006591 | 0.03036  | 0.0007755 | .                                |
| rs7184647  | 16 | 26513167  | 0.0006591 | 0.03036  | 0.0007755 | .                                |
| rs4671363  | 2  | 53551439  | 0.0006592 | -0.03095 | 0.0005043 | .                                |
| rs4942102  | 13 | 42804621  | 0.0006596 | 0.04311  | 0.0007219 | DGKH(+0.733kb)                   |
| rs9892976  | 17 | 53060329  | 0.00066   | -0.03418 | 0.000626  | STXBP4(0) COX11(+14.28kb)        |
| rs61075221 | 5  | 54198289  | 0.0006601 | 0.09857  | 0.0006801 | .                                |
| rs10183388 | 2  | 102932247 | 0.0006608 | 0.02956  | 0.0005807 | IL1RL1(0)                        |
| rs7662200  | 4  | 110153433 | 0.0006608 | -0.03168 | 0.000596  | COL25A1(0)                       |
| rs1038570  | 2  | 62890171  | 0.0006612 | 0.0381   | 0.0008316 | .                                |
| rs10805158 | 4  | 47873134  | 0.0006616 | -0.03787 | 0.0006615 | NFXL1(0)                         |
| rs4713235  | 6  | 29670478  | 0.0006616 | -0.03015 | 0.0006889 | .                                |
| rs11604960 | 11 | 6528619   | 0.000662  | 0.03102  | 0.0008455 | C11orf47(0)                      |
| rs61611959 | 4  | 90851676  | 0.0006622 | 0.05652  | 0.000692  | MMRN1(0)                         |
| rs61540061 | 8  | 139988075 | 0.0006629 | 0.0551   | 0.0006724 | .                                |
| rs11891659 | 2  | 86747335  | 0.000663  | 0.04385  | 0.0007003 | VPS24(0)                         |
| rs11096481 | 2  | 17811354  | 0.0006636 | -0.0351  | 0.0004849 | VSNL1(0)                         |
| rs17150443 | 7  | 8563287   | 0.000664  | 0.03468  | 0.0007205 | NXPH1(0)                         |
| rs573589   | 11 | 65483981  | 0.0006642 | -0.02973 | 0.0005406 | RNASEH2C(-1.162kb) KAT5(0)       |
| rs314218   | 6  | 69855697  | 0.0006645 | 0.04368  | 0.0007515 | BAI3(0)                          |
| rs11899532 | 2  | 86723016  | 0.0006656 | 0.04279  | 0.0007369 | VPS24(-7.536kb) JMJD1A(+3.177kb) |
| rs1418700  | 1  | 91106333  | 0.0006664 | -0.03315 | 0.0007301 | .                                |
| rs2177164  | 7  | 47866436  | 0.0006666 | -0.03055 | 0.0005917 | PKD1L1(0) FLJ21075(+6.992kb)     |
| rs59026369 | 2  | 86805690  | 0.0006667 | 0.04127  | 0.0007076 | VPS24(+15.09kb)                  |
| rs6923066  | 6  | 133264674 | 0.0006673 | 0.0496   | 0.0008485 | .                                |
| rs34248410 | 6  | 165569352 | 0.0006675 | -0.04336 | 0.0005788 | .                                |
| rs2180123  | 6  | 153268252 | 0.0006681 | -0.03471 | 0.0006276 | .                                |
| rs1013785  | 18 | 10707434  | 0.0006682 | 0.03394  | 0.0005968 | FAM38B(+9.62kb)                  |
| rs12327922 | 2  | 226070752 | 0.0006682 | 0.03778  | 0.0007277 | .                                |
| rs11896176 | 2  | 127053673 | 0.0006686 | 0.04156  | 0.0008331 | .                                |
| rs3914213  | 4  | 30545060  | 0.0006686 | 0.03014  | 0.0008352 | .                                |
| rs2723645  | 11 | 6519363   | 0.0006688 | 0.03084  | 0.0008269 | FXC1(+13.45kb) C11orf47(0) ARFIP |
| rs55663539 | 19 | 31041654  | 0.0006688 | -0.04273 | 0.0006265 | ZNF536(0)                        |
| rs4902887  | 14 | 71613789  | 0.000669  | -0.1314  | 0.0006004 | .                                |
| rs13190668 | 5  | 7113315   | 0.00067   | -0.03599 | 0.000572  | .                                |
| rs3815086  | 6  | 30113344  | 0.0006702 | -0.03517 | 0.0005624 | TRIM15(-17.64kb) TRIM40(0) TRIM1 |
| rs17194767 | 6  | 30256885  | 0.0006703 | 0.07159  | 0.0004404 | .                                |
| rs7973611  | 12 | 91444397  | 0.0006703 | 0.03006  | 0.0007657 | KERA(0)                          |
| rs9972494  | 15 | 38930523  | 0.0006703 | 0.06682  | 0.0008572 | .                                |
| rs4891103  | 18 | 73673295  | 0.000671  | -0.0538  | 0.0005803 | .                                |
| rs10839567 | 11 | 6520664   | 0.0006715 | 0.03081  | 0.000834  | FXC1(+14.75kb) C11orf47(0) ARFIP |
| rs651387   | 1  | 201569480 | 0.0006717 | 0.07274  | 0.0006877 | .                                |
| rs2424500  | 20 | 22988426  | 0.0006718 | 0.05169  | 0.0007483 | .                                |
| rs7576148  | 2  | 26308251  | 0.0006725 | -0.1199  | 0.0006531 | RAB10(0)                         |



|            |    |           |           |          |           |                                  |
|------------|----|-----------|-----------|----------|-----------|----------------------------------|
| rs17476839 | 19 | 12762783  | 0.0006727 | 0.03252  | 0.0007749 | MORG1(-14.84kb) MAN2B1(0) C19orf |
| rs4242620  | 9  | 85955438  | 0.0006727 | 0.03488  | 0.0008099 | FRMD3(0)                         |
| rs12998264 | 2  | 62833706  | 0.0006728 | 0.04239  | 0.0008396 | .                                |
| rs17187617 | 1  | 208776565 | 0.0006738 | -0.05449 | 0.0005915 | .                                |
| rs4451785  | 12 | 95170867  | 0.0006742 | -0.03087 | 0.0007595 | .                                |
| rs4395500  | 4  | 13824647  | 0.0006749 | 0.03044  | 0.0009424 | .                                |
| rs7615277  | 3  | 27097159  | 0.0006749 | -0.03685 | 0.0007754 | .                                |
| rs13208885 | 6  | 69767996  | 0.0006754 | 0.07618  | 0.0006733 | BAI3(0)                          |
| rs761905   | 1  | 186039006 | 0.0006763 | 0.03056  | 0.0005315 | HMCN1(0)                         |
| rs2748392  | 10 | 134157687 | 0.0006768 | 0.03159  | 0.0006251 | LRRC27(0)                        |
| rs2787170  | 9  | 26169052  | 0.0006772 | 0.03371  | 0.000657  | .                                |
| rs8009532  | 14 | 22161578  | 0.0006777 | -0.0436  | 0.0007285 | .                                |
| rs10769693 | 11 | 6520346   | 0.0006781 | 0.0308   | 0.000839  | FXC1(+14.44kb) C11orf47(0) ARFIP |
| rs2555158  | 11 | 6520164   | 0.0006781 | 0.0308   | 0.000839  | FXC1(+14.25kb) C11orf47(0) ARFIP |
| rs12344211 | 9  | 97691104  | 0.000679  | -0.03422 | 0.0006692 | C9orf3(0)                        |
| rs17333822 | 1  | 204283575 | 0.000679  | -0.03068 | 0.0004775 | PLEKHA6(0)                       |
| rs1420091  | 2  | 102917234 | 0.0006792 | 0.02949  | 0.0005901 | IL1RL1(-10.73kb)                 |
| rs1485394  | 12 | 53955485  | 0.0006797 | -0.04264 | 0.0004568 | ATF7(0)                          |
| rs28540059 | 3  | 193478156 | 0.0006797 | 0.03824  | 0.0007693 | .                                |
| rs4638914  | 3  | 193477699 | 0.0006797 | 0.03824  | 0.0007693 | .                                |
| rs1191735  | 5  | 119422912 | 0.0006801 | -0.03046 | 0.0007625 | .                                |
| rs35296070 | 7  | 99057341  | 0.0006808 | 0.1074   | 0.0007049 | ZNF789(-13.17kb) CPSF4(+2.345kb) |
| rs1398150  | 1  | 204317650 | 0.0006812 | -0.03131 | 0.0004947 | PLEKHA6(0)                       |
| rs2279462  | 8  | 59507950  | 0.0006813 | 0.0333   | 0.0008419 | SDCBP(+12.53kb) NSMAF(0)         |
| rs2949071  | 2  | 36135615  | 0.0006814 | -0.05095 | 0.0006455 | .                                |
| rs8016911  | 14 | 22185657  | 0.0006817 | -0.03313 | 0.0006533 | .                                |
| rs1511472  | 6  | 23871249  | 0.0006821 | 0.07989  | 0.0003913 | .                                |
| rs7875089  | 9  | 138877724 | 0.0006822 | 0.03193  | 0.0004076 | .                                |
| rs12338409 | 9  | 97691089  | 0.0006823 | -0.03068 | 0.0006689 | C9orf3(0)                        |
| rs16975229 | 18 | 10703200  | 0.0006827 | 0.03382  | 0.000618  | FAM38B(+5.386kb)                 |
| rs56398450 | 18 | 10702616  | 0.0006827 | 0.03382  | 0.000618  | FAM38B(+4.802kb)                 |
| rs62095570 | 18 | 10702369  | 0.0006827 | 0.03382  | 0.000618  | FAM38B(+4.555kb)                 |
| rs10102709 | 8  | 59462283  | 0.0006829 | 0.03284  | 0.0007813 | SDCBP(-3.444kb)                  |
| rs4776832  | 15 | 67074915  | 0.000684  | 0.07788  | 0.0006503 | SMAD6(+0.589kb)                  |
| rs11038507 | 11 | 45538879  | 0.0006841 | -0.07939 | 0.0006073 | .                                |
| rs1464158  | 2  | 236394141 | 0.0006845 | 0.03099  | 0.0006358 | CENTG2(-8.594kb)                 |
| rs36008116 | 6  | 165554837 | 0.0006846 | -0.039   | 0.0007708 | .                                |
| rs60944662 | 6  | 165554260 | 0.0006846 | -0.039   | 0.0007708 | .                                |
| rs1412244  | 6  | 169503318 | 0.0006849 | 0.05182  | 0.0009019 | .                                |
| rs1591014  | 6  | 169499873 | 0.0006849 | 0.05182  | 0.0009019 | .                                |
| rs9364348  | 6  | 169504118 | 0.0006849 | 0.05182  | 0.0009019 | .                                |
| rs9689891  | 6  | 169504490 | 0.0006849 | 0.05182  | 0.0009019 | .                                |
| rs9767703  | 6  | 169503643 | 0.0006849 | 0.05182  | 0.0009019 | .                                |
| rs2086768  | 8  | 51548201  | 0.0006853 | -0.04546 | 0.0005331 | SNTG1(0)                         |
| rs16883530 | 5  | 54196948  | 0.0006857 | 0.1206   | 0.0007105 | .                                |
| rs59365379 | 5  | 54194380  | 0.0006857 | 0.1206   | 0.0007105 | .                                |
| rs7949206  | 11 | 76349080  | 0.000686  | 0.04143  | 0.0005589 | LRRC32(-19.49kb)                 |

|            |    |           |           |          |           |                                  |
|------------|----|-----------|-----------|----------|-----------|----------------------------------|
| rs56085932 | 7  | 8562733   | 0.0006862 | 0.03466  | 0.0007302 | NXPH1(0)                         |
| rs2258208  | 20 | 22974778  | 0.0006865 | 0.03412  | 0.0007615 | .                                |
| rs7570358  | 2  | 3358098   | 0.0006865 | 0.05163  | 0.0007513 | TSSC1(0)                         |
| rs7513240  | 1  | 204319907 | 0.0006867 | -0.03216 | 0.0004816 | PLEKHA6(0)                       |
| rs6902068  | 6  | 104340262 | 0.0006868 | 0.04927  | 0.0005389 | .                                |
| rs12599324 | 16 | 70723404  | 0.0006872 | 0.03012  | 0.0007381 | VAC14(0) ABBA-1(+3.45kb)         |
| rs7190215  | 16 | 73737618  | 0.0006873 | 0.04635  | 0.0007811 | .                                |
| rs7190217  | 16 | 73737623  | 0.0006873 | 0.04635  | 0.0007811 | .                                |
| rs10812362 | 9  | 26191311  | 0.0006875 | 0.03231  | 0.0005415 | .                                |
| rs360391   | 2  | 127048810 | 0.0006877 | 0.04018  | 0.0008345 | .                                |
| rs59047017 | 13 | 26288478  | 0.0006881 | 0.04739  | 0.0004189 | ATP8A2(0)                        |
| rs4938626  | 11 | 118974588 | 0.0006885 | -0.06421 | 0.0005759 | MIZF(-17.7kb) HMBS(+10.33kb) H2A |
| rs720270   | 11 | 6529540   | 0.0006886 | 0.03089  | 0.0008783 | C11orf47(0)                      |
| rs2057672  | 12 | 47445967  | 0.000689  | 0.04503  | 0.0006751 | .                                |
| rs218759   | 4  | 14423418  | 0.0006894 | 0.04775  | 0.000527  | .                                |
| rs1997423  | 12 | 91488139  | 0.0006897 | 0.03357  | 0.0006794 | LUM(-9.092kb)                    |
| rs9594710  | 13 | 42795183  | 0.00069   | 0.04231  | 0.0007381 | DGKH(0)                          |
| rs9594711  | 13 | 42796960  | 0.00069   | 0.04231  | 0.0007381 | DGKH(0)                          |
| rs12297390 | 12 | 31118614  | 0.0006904 | 0.04561  | 0.0005732 | TSPAN11(0)                       |
| rs11040901 | 11 | 6524865   | 0.0006907 | -0.0324  | 0.0005824 | FXC1(+18.95kb) C11orf47(0)       |
| rs4268925  | 2  | 17793128  | 0.0006907 | -0.03497 | 0.0005053 | VSNL1(0)                         |
| rs7752380  | 6  | 141129734 | 0.0006916 | -0.06131 | 0.000764  | .                                |
| rs9595206  | 13 | 45360761  | 0.0006916 | 0.0461   | 0.0004877 | .                                |
| rs1471285  | 4  | 136153472 | 0.0006921 | -0.03122 | 0.00062   | .                                |
| rs12144309 | 1  | 114315493 | 0.0006923 | 0.03808  | 0.00092   | RSBN1(0) PHTF1(+13.72kb)         |
| rs4713314  | 6  | 30292569  | 0.0006924 | 0.06781  | 0.0004352 | TRIM39(-2.47kb)                  |
| rs2518245  | 6  | 101967710 | 0.0006925 | 0.0455   | 0.0007598 | GRIK2(0)                         |
| rs2300213  | 20 | 3986723   | 0.000693  | 0.03511  | 0.0007108 | RNF24(0)                         |
| rs4239291  | 18 | 10709971  | 0.000694  | 0.03384  | 0.0006215 | FAM38B(+12.16kb)                 |
| rs10958015 | 8  | 51567217  | 0.0006942 | -0.0331  | 0.0005445 | SNTG1(0)                         |
| rs13316756 | 3  | 142340879 | 0.0006942 | 0.04154  | 0.0007352 | PLS1(-1.464kb)                   |
| rs7197004  | 16 | 9886907   | 0.0006942 | -0.04403 | 0.0005893 | GRIN2A(0)                        |
| rs59802850 | 18 | 2630452   | 0.0006952 | 0.06884  | 0.0006631 | NDC80(+13.82kb)                  |
| rs4687218  | 3  | 191213468 | 0.0006956 | -0.03044 | 0.0008334 | .                                |
| rs7940980  | 11 | 66172910  | 0.0006959 | -0.03354 | 0.0009776 | NPAS4(-15.56kb)                  |
| rs666458   | 1  | 201570540 | 0.000696  | 0.07257  | 0.0007085 | .                                |
| rs34098010 | 9  | 99183451  | 0.0006964 | 0.08626  | 0.0004054 | ZNF367(+2.782kb)                 |
| rs4796432  | 17 | 7411855   | 0.0006965 | 0.1059   | 0.000695  | POLR2A(0)                        |
| rs7184090  | 16 | 64672720  | 0.0006972 | 0.03065  | 0.0005578 | .                                |
| rs8059374  | 16 | 64672215  | 0.0006972 | 0.03065  | 0.0005578 | .                                |
| rs243775   | 6  | 54323754  | 0.0006976 | -0.0618  | 0.0005838 | .                                |
| rs243779   | 6  | 54320167  | 0.0006976 | -0.0618  | 0.0005838 | .                                |
| rs243783   | 6  | 54318478  | 0.0006976 | -0.0618  | 0.0005838 | .                                |
| rs9485244  | 6  | 148409521 | 0.0006978 | 0.02975  | 0.000616  | .                                |
| rs17114566 | 5  | 152828910 | 0.0006979 | 0.0865   | 0.0006547 | .                                |
| rs17114570 | 5  | 152835647 | 0.0006979 | 0.0865   | 0.0006547 | .                                |
| rs4339407  | 5  | 152829934 | 0.0006979 | 0.0865   | 0.0006547 | .                                |

|            |    |           |           |          |           |                                  |
|------------|----|-----------|-----------|----------|-----------|----------------------------------|
| rs472603   | 5  | 152855224 | 0.0006979 | 0.0865   | 0.0006547 | GRIA1(-14.86kb)                  |
| rs473625   | 5  | 152839472 | 0.0006979 | 0.0865   | 0.0006547 | .                                |
| rs479649   | 5  | 152853858 | 0.0006979 | 0.0865   | 0.0006547 | GRIA1(-16.23kb)                  |
| rs509593   | 5  | 152853528 | 0.0006979 | 0.0865   | 0.0006547 | GRIA1(-16.55kb)                  |
| rs512885   | 5  | 152845513 | 0.0006979 | 0.0865   | 0.0006547 | .                                |
| rs512938   | 5  | 152838052 | 0.0006979 | 0.0865   | 0.0006547 | .                                |
| rs518277   | 5  | 152856287 | 0.0006979 | 0.0865   | 0.0006547 | GRIA1(-13.8kb)                   |
| rs522610   | 5  | 152841607 | 0.0006979 | 0.0865   | 0.0006547 | .                                |
| rs526154   | 5  | 152849312 | 0.0006979 | 0.0865   | 0.0006547 | .                                |
| rs546396   | 5  | 152841318 | 0.0006979 | 0.0865   | 0.0006547 | .                                |
| rs551059   | 5  | 152840815 | 0.0006979 | 0.0865   | 0.0006547 | .                                |
| rs555274   | 5  | 152848521 | 0.0006979 | 0.0865   | 0.0006547 | .                                |
| rs56691914 | 5  | 152832062 | 0.0006979 | 0.0865   | 0.0006547 | .                                |
| rs568014   | 5  | 152846102 | 0.0006979 | 0.0865   | 0.0006547 | .                                |
| rs568018   | 5  | 152854015 | 0.0006979 | 0.0865   | 0.0006547 | GRIA1(-16.07kb)                  |
| rs570616   | 5  | 152850550 | 0.0006979 | 0.0865   | 0.0006547 | GRIA1(-19.53kb)                  |
| rs577665   | 5  | 152840197 | 0.0006979 | 0.0865   | 0.0006547 | .                                |
| rs59323472 | 5  | 152832275 | 0.0006979 | 0.0865   | 0.0006547 | .                                |
| rs6865266  | 5  | 152833891 | 0.0006979 | 0.0865   | 0.0006547 | .                                |
| rs6889252  | 5  | 152834373 | 0.0006979 | 0.0865   | 0.0006547 | .                                |
| rs6889267  | 5  | 152834400 | 0.0006979 | 0.0865   | 0.0006547 | .                                |
| rs779015   | 5  | 152851655 | 0.0006979 | 0.0865   | 0.0006547 | GRIA1(-18.43kb)                  |
| rs937212   | 5  | 152851118 | 0.0006979 | 0.0865   | 0.0006547 | GRIA1(-18.96kb)                  |
| rs9639502  | 7  | 24928777  | 0.0006982 | -0.05028 | 0.0006205 | OSBPL3(0)                        |
| rs17114562 | 5  | 152824797 | 0.0006984 | 0.05411  | 0.0006524 | .                                |
| rs17114564 | 5  | 152826064 | 0.0006984 | 0.08653  | 0.0006524 | .                                |
| rs4888674  | 16 | 77783749  | 0.0006984 | 0.08653  | 0.0007252 | NUDT7(+7.595kb)                  |
| rs55748671 | 5  | 152822869 | 0.0006984 | 0.08653  | 0.0006524 | .                                |
| rs1512149  | 4  | 30549459  | 0.0006987 | 0.03     | 0.0008681 | .                                |
| rs12228896 | 12 | 20688663  | 0.000699  | 0.03159  | 0.0007056 | PDE3A(0)                         |
| rs4490304  | 3  | 193477594 | 0.0006991 | 0.0382   | 0.0007927 | .                                |
| rs9260794  | 6  | 29939677  | 0.0006996 | 0.03894  | 0.0007362 | HLA-A29.1(0) HCG9(-3.214kb)      |
| rs2058886  | 8  | 129206259 | 0.0007005 | -0.05373 | 0.0006515 | .                                |
| rs2319874  | 14 | 22179342  | 0.0007011 | -0.04644 | 0.0007378 | .                                |
| rs850736   | 17 | 42446420  | 0.0007012 | 0.0316   | 0.0005498 | ITGA2B(-3.129kb) GRN(+15.95kb)   |
| rs7202848  | 16 | 9886992   | 0.0007013 | -0.03273 | 0.0006271 | GRIN2A(0)                        |
| rs7294352  | 12 | 47419611  | 0.0007014 | 0.06156  | 0.0007176 | .                                |
| rs3914129  | 7  | 103526865 | 0.0007019 | -0.03381 | 0.0004538 | RELN(0)                          |
| rs58371778 | 5  | 152832001 | 0.000702  | 0.08641  | 0.0006637 | .                                |
| rs6817850  | 4  | 110152912 | 0.0007024 | -0.03128 | 0.0006719 | COL25A1(0)                       |
| rs1398151  | 1  | 204317602 | 0.0007026 | -0.03126 | 0.0005015 | PLEKHA6(0)                       |
| rs490565   | 11 | 104913514 | 0.0007029 | -0.04159 | 0.0008052 | COP1(0) CASP1(+7.657kb)          |
| rs1785640  | 11 | 66223158  | 0.0007034 | -0.03214 | 0.0009921 | PELI3(-11.18kb) MRPL11(+16.85kb) |
| rs2509565  | 11 | 66208722  | 0.0007034 | -0.03214 | 0.0009921 | NPAS4(+14.54kb) MRPL11(+2.412kb) |
| rs12616179 | 2  | 183379658 | 0.0007041 | -0.03103 | 0.0008529 | PDE1A(0)                         |
| rs2343260  | 6  | 69859559  | 0.0007042 | 0.04363  | 0.0008143 | BAI3(0)                          |
| rs56365289 | 2  | 127053020 | 0.0007052 | 0.04213  | 0.0008155 | .                                |

|            |    |           |           |          |           |                                   |
|------------|----|-----------|-----------|----------|-----------|-----------------------------------|
| rs8192227  | 5  | 6664549   | 0.0007053 | 0.08921  | 0.0007463 | SRD5A1(0)                         |
| rs57466495 | 18 | 10707839  | 0.0007057 | 0.03391  | 0.0006557 | FAM38B(+10.03kb)                  |
| rs4580738  | 5  | 59590024  | 0.0007058 | 0.08784  | 0.0007266 | .                                 |
| rs6918871  | 6  | 24453427  | 0.000706  | 0.04928  | 0.0007066 | GPLD1(0)                          |
| rs7744266  | 6  | 133262211 | 0.000706  | 0.09716  | 0.0008825 | .                                 |
| rs62575095 | 9  | 108224124 | 0.0007061 | 0.03249  | 0.000743  | FSD1L(0)                          |
| rs12670579 | 7  | 47868027  | 0.0007064 | -0.03038 | 0.000605  | PKD1L1(0) FLJ21075(+8.583kb)      |
| rs2106432  | 7  | 92970847  | 0.0007064 | 0.03036  | 0.0008707 | CCDC132(0)                        |
| rs7005701  | 8  | 22615379  | 0.0007064 | -0.09996 | 0.0005748 | PEBP4(0)                          |
| rs2706737  | 4  | 170126803 | 0.0007069 | 0.03071  | 0.0006545 | SH3RF1(0)                         |
| rs10073101 | 5  | 26780996  | 0.0007071 | -0.101   | 0.0006704 | .                                 |
| rs1420044  | 16 | 9914133   | 0.0007073 | -0.03441 | 0.0006739 | GRIN2A(0)                         |
| rs4936463  | 11 | 118975355 | 0.0007075 | -0.0618  | 0.0005926 | MIZF(-16.93kb) HMBS(+11.1kb) H2A  |
| rs10420445 | 19 | 18952526  | 0.0007077 | 0.05724  | 0.0006769 | UPF1(0)                           |
| rs2293748  | 7  | 130629493 | 0.0007079 | 0.04104  | 0.0007825 | .                                 |
| rs6720414  | 2  | 86824444  | 0.0007079 | 0.03031  | 0.0007588 | RNF103(-6.071kb)                  |
| rs8138290  | 22 | 46786808  | 0.0007081 | 0.05716  | 0.0004322 | CELSR1(0)                         |
| rs12528338 | 6  | 165553675 | 0.0007088 | -0.03862 | 0.0008058 | .                                 |
| rs3762719  | 3  | 13896140  | 0.0007092 | 0.03714  | 0.0007783 | WNT7A(0)                          |
| rs9261447  | 6  | 30095202  | 0.0007103 | -0.03524 | 0.0005818 | TRIM40(-9.307kb) TRIM31(+14.34kb) |
| rs7186958  | 16 | 64631355  | 0.0007106 | 0.03071  | 0.000576  | .                                 |
| rs11891123 | 2  | 88365338  | 0.0007107 | 0.04235  | 0.0005644 | SMYD1(-2.043kb) KRCC1(+10.09kb)   |
| rs60073472 | 2  | 86780540  | 0.0007114 | 0.04099  | 0.0007644 | VPS24(0)                          |
| rs7863573  | 9  | 110680544 | 0.0007118 | 0.04021  | 0.0004897 | .                                 |
| rs8063113  | 16 | 78271066  | 0.0007136 | -0.05083 | 0.0005361 | WVVOX(0)                          |
| rs34146618 | 3  | 64329079  | 0.0007139 | -0.08332 | 0.0006655 | .                                 |
| rs4497715  | 16 | 64619679  | 0.0007143 | 0.03065  | 0.0005635 | .                                 |
| rs10189202 | 2  | 102930380 | 0.0007148 | 0.02946  | 0.0006224 | IL1RL1(0)                         |
| rs314204   | 6  | 69858720  | 0.0007148 | 0.04356  | 0.0008295 | BAI3(0)                           |
| rs7568138  | 2  | 127050948 | 0.0007152 | 0.04191  | 0.0008885 | .                                 |
| rs17716830 | 16 | 77771999  | 0.0007153 | 0.05307  | 0.0007851 | NUDT7(0)                          |
| rs12281047 | 11 | 6521554   | 0.0007165 | -0.03205 | 0.0006327 | FXC1(+15.64kb) C11orf47(0) ARFIP  |
| rs372143   | 14 | 68587338  | 0.0007177 | -0.03851 | 0.0008349 | RAD51L1(0)                        |
| rs7298336  | 12 | 53957330  | 0.0007184 | -0.04246 | 0.0004835 | ATF7(0)                           |
| rs2177397  | 3  | 142343980 | 0.0007188 | 0.04146  | 0.0007601 | PLS1(0)                           |
| rs1985339  | 2  | 86815227  | 0.0007192 | 0.04095  | 0.0007741 | RNF103(-15.29kb)                  |
| rs60796561 | 2  | 86820350  | 0.0007192 | 0.04095  | 0.0007741 | RNF103(-10.16kb)                  |
| rs7585722  | 2  | 86819128  | 0.0007192 | 0.04095  | 0.0007741 | RNF103(-11.39kb)                  |
| rs6710780  | 2  | 86776683  | 0.0007194 | 0.04193  | 0.0007615 | VPS24(0)                          |
| rs9752     | 2  | 85886667  | 0.0007198 | -0.03148 | 0.0006233 | USP39(+10.26kb) SFTPB(0)          |
| rs9815025  | 3  | 89215213  | 0.0007198 | 0.03626  | 0.0008472 | EPHA3(0)                          |
| rs880608   | 5  | 169297652 | 0.0007202 | -0.03065 | 0.0008368 | LOC100131897(0) DOCK2(0)          |
| rs12926940 | 16 | 64712046  | 0.0007204 | 0.03153  | 0.0005196 | .                                 |
| rs28461931 | 6  | 123953347 | 0.0007204 | -0.07497 | 0.0006084 | TRDN(0)                           |
| rs2846921  | 11 | 127864676 | 0.0007205 | -0.03699 | 0.0005302 | .                                 |
| rs4898644  | 14 | 50518129  | 0.0007208 | -0.03762 | 0.000637  | .                                 |
| rs8021027  | 14 | 50519022  | 0.0007208 | -0.03762 | 0.000637  | .                                 |

|            |    |           |           |          |           |                                   |
|------------|----|-----------|-----------|----------|-----------|-----------------------------------|
| rs3845160  | 4  | 47953515  | 0.0007211 | -0.03781 | 0.0007256 | CNGA1(0)                          |
| rs2256919  | 6  | 29940750  | 0.0007212 | 0.03058  | 0.0006792 | HLA-A29.1(0) HCG9(-2.141kb)       |
| rs13237274 | 7  | 131068606 | 0.0007214 | 0.03607  | 0.0008687 | MKLN1(0)                          |
| rs768927   | 10 | 16542184  | 0.0007218 | 0.0303   | 0.0005042 | PTER(0) C1QL3(-13.56kb)           |
| rs7216228  | 17 | 13386169  | 0.0007225 | -0.03403 | 0.0008258 | HS3ST3A1(-12.84kb)                |
| rs2209512  | 13 | 42791727  | 0.0007228 | 0.04213  | 0.0007781 | DGKH(0)                           |
| rs2209513  | 13 | 42791699  | 0.0007228 | 0.04213  | 0.0007781 | DGKH(0)                           |
| rs2209514  | 13 | 42791689  | 0.0007228 | 0.04213  | 0.0007781 | DGKH(0)                           |
| rs12528982 | 6  | 165549798 | 0.0007235 | -0.03888 | 0.0008391 | .                                 |
| rs7302835  | 12 | 53955066  | 0.0007236 | -0.04247 | 0.000485  | ATF7(0)                           |
| rs1920711  | 12 | 91488584  | 0.000724  | 0.03352  | 0.0007083 | LUM(-8.647kb)                     |
| rs10801625 | 1  | 197814759 | 0.0007243 | 0.03688  | 0.0008827 | .                                 |
| rs12637863 | 3  | 89189085  | 0.0007244 | -0.03483 | 0.0009001 | EPHA3(0)                          |
| rs6545950  | 2  | 62751619  | 0.0007244 | 0.03648  | 0.0007721 | TMEM17(+18.14kb)                  |
| rs9261453  | 6  | 30099948  | 0.0007245 | -0.03557 | 0.0005887 | TRIM40(-4.561kb) TRIM31(+19.08kb) |
| rs4233428  | 1  | 91099720  | 0.0007246 | -0.03277 | 0.0007544 | .                                 |
| rs11647877 | 16 | 9914095   | 0.0007256 | -0.03438 | 0.0006857 | GRIN2A(0)                         |
| rs754702   | 2  | 240554081 | 0.0007258 | -0.03675 | 0.0008413 | .                                 |
| rs1035705  | 15 | 31342744  | 0.0007261 | 0.03072  | 0.000923  | TRPM1(0)                          |
| rs2122241  | 2  | 142868864 | 0.0007262 | -0.0792  | 0.0006697 | LRP1B(0)                          |
| rs9302390  | 16 | 9907376   | 0.0007263 | -0.03409 | 0.0006913 | GRIN2A(0)                         |
| rs870692   | 10 | 958058    | 0.0007264 | 0.1113   | 0.0007434 | .                                 |
| rs7165285  | 15 | 60619292  | 0.0007271 | -0.03061 | 0.0008636 | .                                 |
| rs707130   | 2  | 157197583 | 0.0007273 | -0.03386 | 0.0006733 | NR4A2(+8.296kb)                   |
| rs1838114  | 13 | 19496434  | 0.0007276 | -0.03125 | 0.0006284 | .                                 |
| rs407575   | 2  | 17737762  | 0.0007277 | -0.03354 | 0.0005119 | VSNL1(0)                          |
| rs426590   | 2  | 17738199  | 0.0007277 | -0.03354 | 0.0005119 | VSNL1(0)                          |
| rs55818922 | 5  | 117297639 | 0.000728  | 0.05364  | 0.0007624 | .                                 |
| rs10755556 | 6  | 169507019 | 0.0007281 | 0.05161  | 0.0009498 | .                                 |
| rs7586028  | 2  | 86819409  | 0.0007283 | 0.04091  | 0.0007831 | RNF103(-11.11kb)                  |
| rs13301443 | 9  | 99095181  | 0.0007285 | 0.07753  | 0.0004244 | SLC35D2(0)                        |
| rs218752   | 4  | 14419652  | 0.0007287 | 0.04754  | 0.0005587 | .                                 |
| rs4513242  | 2  | 127080194 | 0.0007288 | 0.04226  | 0.0008674 | .                                 |
| rs12655744 | 5  | 7103593   | 0.0007291 | -0.03114 | 0.0005649 | .                                 |
| rs3757379  | 7  | 47859239  | 0.0007295 | -0.05001 | 0.0006379 | PKD1L1(0) FLJ21075(0)             |
| rs7711700  | 5  | 91393154  | 0.0007295 | -0.0299  | 0.0005113 | .                                 |
| rs17027265 | 2  | 86715894  | 0.0007296 | 0.04075  | 0.0007845 | VPS24(-14.66kb) JMJD1A(0)         |
| rs56085540 | 2  | 86714431  | 0.0007296 | 0.04075  | 0.0007845 | VPS24(-16.12kb) JMJD1A(0)         |
| rs61028062 | 2  | 86716081  | 0.0007296 | 0.04075  | 0.0007845 | VPS24(-14.47kb) JMJD1A(0)         |
| rs61830598 | 1  | 197773646 | 0.0007297 | 0.03767  | 0.0009999 | .                                 |
| rs1437614  | 2  | 86726626  | 0.0007299 | 0.04082  | 0.0007858 | VPS24(-3.926kb) JMJD1A(+6.787kb)  |
| rs7895319  | 10 | 66815242  | 0.0007302 | 0.03117  | 0.0006771 | .                                 |
| rs12616229 | 2  | 183379648 | 0.0007309 | -0.03076 | 0.0008747 | PDE1A(0)                          |
| rs12622605 | 2  | 183379652 | 0.0007309 | -0.03076 | 0.0008747 | PDE1A(0)                          |
| rs6774660  | 3  | 7557427   | 0.0007309 | 0.03361  | 0.0008503 | GRM7(0)                           |
| rs9404483  | 6  | 104335985 | 0.0007313 | 0.04659  | 0.0005909 | .                                 |
| rs61839705 | 1  | 242824980 | 0.0007319 | 0.04044  | 0.0007949 | .                                 |

|            |    |           |           |          |           |                                   |
|------------|----|-----------|-----------|----------|-----------|-----------------------------------|
| rs2812298  | 9  | 108207580 | 0.0007325 | 0.03257  | 0.0007757 | FSD1L(-2.744kb)                   |
| rs4692097  | 4  | 30552981  | 0.0007332 | 0.02991  | 0.000901  | .                                 |
| rs3815821  | 16 | 69170568  | 0.0007336 | 0.05747  | 0.0007657 | HAS3(+17.95kb) CTF8(+4.084kb) CI  |
| rs62442108 | 6  | 165556155 | 0.0007337 | -0.03881 | 0.0008215 | .                                 |
| rs12816237 | 12 | 91750321  | 0.0007345 | -0.03243 | 0.0006896 | .                                 |
| rs10043620 | 5  | 72521734  | 0.0007346 | 0.03581  | 0.0008058 | .                                 |
| rs218764   | 4  | 14426951  | 0.000735  | 0.04744  | 0.0005651 | .                                 |
| rs4582093  | 3  | 142342945 | 0.0007354 | 0.04137  | 0.0007801 | PLS1(0)                           |
| rs17182761 | 14 | 22176920  | 0.0007357 | -0.03297 | 0.0007082 | .                                 |
| rs2508031  | 6  | 30121066  | 0.0007359 | -0.03517 | 0.0005873 | TRIM15(-9.916kb) TRIM40(+4.554kb) |
| rs62039886 | 16 | 64637745  | 0.0007374 | 0.03061  | 0.0005832 | .                                 |
| rs9510378  | 13 | 19459824  | 0.0007375 | 0.0309   | 0.0004853 | .                                 |
| rs4738528  | 8  | 57510898  | 0.0007376 | 0.04278  | 0.0005486 | .                                 |
| rs6941596  | 6  | 164790196 | 0.0007378 | 0.07201  | 0.0008852 | .                                 |
| rs10485355 | 6  | 155194443 | 0.0007383 | -0.03898 | 0.000486  | .                                 |
| rs6954324  | 7  | 77859083  | 0.0007383 | 0.0301   | 0.0007862 | MAGI2(0)                          |
| rs13163369 | 5  | 6817813   | 0.0007394 | -0.09082 | 0.0006446 | .                                 |
| rs6787467  | 3  | 58377888  | 0.0007396 | 0.03139  | 0.0008544 | PXK(0)                            |
| rs55900386 | 18 | 10702898  | 0.0007405 | 0.03638  | 0.0006247 | FAM38B(+5.084kb)                  |
| rs56382936 | 18 | 10702836  | 0.0007405 | 0.03638  | 0.0006247 | FAM38B(+5.022kb)                  |
| rs58469131 | 18 | 10702464  | 0.0007405 | 0.03638  | 0.0006247 | FAM38B(+4.65kb)                   |
| rs62095593 | 18 | 10702393  | 0.0007405 | 0.03638  | 0.0006247 | FAM38B(+4.579kb)                  |
| rs7875420  | 9  | 14670890  | 0.0007405 | -0.03061 | 0.0008797 | ZDHHC21(0)                        |
| rs2021363  | 6  | 30250600  | 0.0007411 | 0.06552  | 0.0004977 | FLJ45422(+15.87kb)                |
| rs4897622  | 6  | 133243533 | 0.0007415 | 0.04428  | 0.0007833 | .                                 |
| rs61316227 | 12 | 31122249  | 0.0007415 | 0.05233  | 0.0006439 | TSPAN11(0)                        |
| rs17070493 | 3  | 64341472  | 0.0007424 | -0.08042 | 0.0006895 | .                                 |
| rs1233392  | 6  | 29550416  | 0.000743  | 0.08597  | 0.0006897 | OR2H2(-5.266kb) GABBR1(-19.59kb)  |
| rs558939   | 5  | 152848097 | 0.000743  | -0.04474 | 0.0007056 | .                                 |
| rs12927378 | 16 | 64707124  | 0.0007432 | 0.03118  | 0.0005637 | .                                 |
| rs10157893 | 1  | 197943933 | 0.0007433 | -0.06256 | 0.0008524 | .                                 |
| rs798362   | 7  | 77879443  | 0.0007434 | 0.03129  | 0.0007557 | MAGI2(0)                          |
| rs10044334 | 5  | 146122661 | 0.0007436 | -0.03695 | 0.0009116 | PPP2R2B(0)                        |
| rs6719645  | 2  | 212524973 | 0.0007436 | 0.03398  | 0.0006061 | ERBB4(0)                          |
| rs17514013 | 2  | 99286794  | 0.0007437 | -0.03241 | 0.0009982 | MGAT4A(0)                         |
| rs2072489  | 2  | 49195409  | 0.000745  | -0.04865 | 0.0006679 | FSHR(0)                           |
| rs6954353  | 7  | 77859159  | 0.0007466 | 0.02995  | 0.0008091 | MAGI2(0)                          |
| rs6447599  | 4  | 47944853  | 0.0007469 | -0.0375  | 0.0007179 | CNGA1(0)                          |
| rs1580921  | 12 | 98563944  | 0.0007476 | -0.03172 | 0.0007311 | .                                 |
| rs56875109 | 2  | 86725369  | 0.0007476 | 0.04073  | 0.0008074 | VPS24(-5.183kb) JMJD1A(+5.53kb)   |
| rs59336972 | 2  | 86721182  | 0.0007476 | 0.04073  | 0.0008074 | VPS24(-9.37kb) JMJD1A(+1.343kb)   |
| rs6745875  | 2  | 86730470  | 0.0007476 | 0.04073  | 0.0008074 | VPS24(-0.082kb) JMJD1A(+10.63kb)  |
| rs4469563  | 9  | 14682063  | 0.0007481 | -0.03096 | 0.0007138 | ZDHHC21(0)                        |
| rs6922573  | 6  | 141134572 | 0.0007484 | 0.04833  | 0.0008255 | .                                 |
| rs3775478  | 4  | 90842840  | 0.0007489 | 0.05551  | 0.0007767 | MMRN1(0)                          |
| rs17599277 | 13 | 42797518  | 0.0007497 | 0.04207  | 0.0007998 | DGKH(0)                           |
| rs2352463  | 4  | 47941604  | 0.0007497 | 0.04207  | 0.0007237 | CNGA1(0)                          |

|            |    |           |           |          |           |                                  |
|------------|----|-----------|-----------|----------|-----------|----------------------------------|
| rs9594712  | 13 | 42797189  | 0.0007497 | -0.03747 | 0.0007998 | DGKH(0)                          |
| rs9261518  | 6  | 30116985  | 0.0007499 | -0.03519 | 0.0005915 | TRIM15(-14kb) TRIM40(+0.473kb) T |
| rs10003467 | 4  | 30752187  | 0.0007502 | 0.04035  | 0.0007361 | PCDH7(0)                         |
| rs1728539  | 7  | 29691213  | 0.0007505 | -0.03943 | 0.0005407 | .                                |
| rs6875977  | 5  | 72520535  | 0.0007506 | 0.03269  | 0.0006828 | .                                |
| rs34884301 | 9  | 99125514  | 0.0007508 | 0.07512  | 0.0004728 | SLC35D2(0)                       |
| rs6594002  | 1  | 204267128 | 0.0007509 | -0.02993 | 0.0007884 | PLEKHA6(0)                       |
| rs6733174  | 2  | 102929012 | 0.0007511 | 0.02927  | 0.0006559 | IL1RL1(0)                        |
| rs4304647  | 1  | 204294107 | 0.0007514 | -0.03315 | 0.0005283 | PLEKHA6(0)                       |
| rs9391132  | 6  | 104345037 | 0.0007514 | 0.04648  | 0.0006203 | .                                |
| rs41281731 | 7  | 127978445 | 0.0007517 | 0.06222  | 0.0007482 | RBM28(0) LOC401399(-11.93kb)     |
| rs10114824 | 9  | 14663920  | 0.0007522 | -0.03184 | 0.000769  | ZDHC21(0)                        |
| rs12596008 | 16 | 7272847   | 0.0007522 | 0.03276  | 0.0006178 | A2BP1(0)                         |
| rs17594657 | 5  | 106821940 | 0.0007535 | -0.118   | 0.0007183 | EFNA5(0)                         |
| rs9261501  | 6  | 30111526  | 0.0007538 | -0.03486 | 0.0006158 | TRIM15(-19.46kb) TRIM40(0) TRIM1 |
| rs2278765  | 8  | 406963    | 0.0007549 | -0.04264 | 0.0008852 | FBXO25(0)                        |
| rs1360405  | 20 | 22988856  | 0.0007552 | 0.09039  | 0.0008465 | .                                |
| rs1360406  | 20 | 22988864  | 0.0007552 | 0.05117  | 0.0008465 | .                                |
| rs16924239 | 10 | 68976141  | 0.0007552 | 0.05117  | 0.0007543 | CTNNA3(0)                        |
| rs1154648  | 2  | 53554103  | 0.0007558 | -0.03085 | 0.0005616 | .                                |
| rs4753772  | 11 | 88653706  | 0.000756  | -0.07672 | 0.0006546 | GRM5(0)                          |
| rs4566187  | 16 | 64670555  | 0.0007561 | 0.03056  | 0.0005919 | .                                |
| rs8059764  | 16 | 7278884   | 0.0007566 | -0.03271 | 0.0006267 | A2BP1(0)                         |
| rs1364957  | 8  | 57539999  | 0.0007567 | 0.04321  | 0.0005791 | .                                |
| rs1583848  | 8  | 57539023  | 0.0007567 | 0.04321  | 0.0005791 | .                                |
| rs6996557  | 8  | 57537699  | 0.0007567 | 0.04321  | 0.0005791 | .                                |
| rs6872720  | 5  | 169299685 | 0.0007569 | -0.03032 | 0.0008381 | LOC100131897(0) DOCK2(0)         |
| rs6650488  | 14 | 22161951  | 0.0007572 | -0.04317 | 0.0008152 | .                                |
| rs11661324 | 18 | 10711271  | 0.0007573 | 0.03357  | 0.0006825 | FAM38B(+13.46kb)                 |
| rs16975276 | 18 | 10712441  | 0.0007573 | 0.03357  | 0.0006825 | FAM38B(+14.63kb)                 |
| rs4797465  | 18 | 10709224  | 0.0007573 | 0.03357  | 0.0006825 | FAM38B(+11.41kb)                 |
| rs4797466  | 18 | 10709342  | 0.0007573 | 0.03357  | 0.0006825 | FAM38B(+11.53kb)                 |
| rs4797467  | 18 | 10710626  | 0.0007573 | 0.03357  | 0.0006825 | FAM38B(+12.81kb)                 |
| rs4797468  | 18 | 10711626  | 0.0007573 | 0.03357  | 0.0006825 | FAM38B(+13.81kb)                 |
| rs4797470  | 18 | 10711780  | 0.0007573 | 0.03357  | 0.0006825 | FAM38B(+13.97kb)                 |
| rs62095602 | 18 | 10709049  | 0.0007573 | 0.03357  | 0.0006825 | FAM38B(+11.23kb)                 |
| rs999954   | 18 | 10710530  | 0.0007573 | 0.03357  | 0.0006825 | FAM38B(+12.72kb)                 |
| rs999955   | 18 | 10710336  | 0.0007573 | 0.03357  | 0.0006825 | FAM38B(+12.52kb)                 |
| rs9377581  | 6  | 104344014 | 0.0007576 | 0.04616  | 0.0006215 | .                                |
| rs9386394  | 6  | 104344222 | 0.0007576 | 0.04616  | 0.0006215 | .                                |
| rs9381416  | 6  | 46009132  | 0.0007578 | 0.03169  | 0.0006318 | CLIC5(0)                         |
| rs2288036  | 16 | 69177268  | 0.0007581 | 0.05774  | 0.0007871 | CTF8(+10.78kb) CIRH1A(0)         |
| rs1360407  | 20 | 22989049  | 0.0007588 | 0.05117  | 0.000847  | .                                |
| rs2366856  | 7  | 80257472  | 0.0007589 | -0.1332  | 0.000714  | CD36(0)                          |
| rs1496119  | 6  | 164784051 | 0.000759  | 0.07206  | 0.0009122 | .                                |
| rs35197666 | 1  | 242826859 | 0.0007592 | 0.04019  | 0.0008301 | .                                |
| rs56103852 | 18 | 10703048  | 0.0007597 | 0.03358  | 0.0006937 | FAM38B(+5.234kb)                 |

|            |    |           |           |          |           |                                    |
|------------|----|-----------|-----------|----------|-----------|------------------------------------|
| rs4568467  | 6  | 144964654 | 0.0007598 | -0.03984 | 0.0007317 | UTRN(0)                            |
| rs6721346  | 2  | 102926320 | 0.0007599 | 0.0292   | 0.0006634 | IL1RL1(-1.641kb)                   |
| rs7560868  | 2  | 240560583 | 0.0007603 | -0.03667 | 0.0008378 | .                                  |
| rs2424498  | 20 | 22988352  | 0.0007615 | 0.05118  | 0.0008465 | .                                  |
| rs2424499  | 20 | 22988368  | 0.0007615 | 0.05118  | 0.0008465 | .                                  |
| rs7422491  | 2  | 183204729 | 0.0007617 | 0.03639  | 0.0007838 | PDE1A(0)                           |
| rs61311132 | 5  | 159875645 | 0.0007618 | -0.02986 | 0.0008512 | PTTG1(+19.9kb)                     |
| rs9886     | 11 | 71949665  | 0.0007628 | 0.06134  | 0.0008086 | PHOX2A(-0.455kb) INPPL1(0) FOLR2   |
| rs61944194 | 13 | 19459139  | 0.0007631 | 0.03075  | 0.0005066 | .                                  |
| rs6574844  | 14 | 86230787  | 0.0007633 | 0.1199   | 0.0007778 | .                                  |
| rs56386218 | 2  | 126983345 | 0.0007641 | 0.03946  | 0.0009897 | .                                  |
| rs35599212 | 6  | 165547914 | 0.0007649 | -0.04311 | 0.0006313 | .                                  |
| rs62442092 | 6  | 165547734 | 0.0007649 | -0.04311 | 0.0006313 | .                                  |
| rs1196068  | 2  | 183025444 | 0.0007651 | 0.03058  | 0.0009055 | PDE1A(0)                           |
| rs4951067  | 1  | 204318983 | 0.0007658 | -0.03107 | 0.0005519 | PLEKHA6(0)                         |
| rs12989550 | 2  | 76749225  | 0.000766  | 0.02972  | 0.0005496 | .                                  |
| rs56160357 | 8  | 82186497  | 0.000766  | 0.05227  | 0.0007978 | FABP5(-6.287kb)                    |
| rs7154175  | 14 | 68885812  | 0.0007662 | -0.0326  | 0.0005543 | RAD51L1(0)                         |
| rs1882559  | 2  | 49188314  | 0.0007678 | -0.04852 | 0.0006901 | FSHR(-1.337kb)                     |
| rs17413285 | 3  | 64337773  | 0.000768  | -0.07921 | 0.000707  | .                                  |
| rs13223904 | 7  | 92961913  | 0.0007683 | 0.03085  | 0.0009526 | CCDC132(0)                         |
| rs2916805  | 6  | 29917503  | 0.0007685 | -0.03176 | 0.0006529 | HLA-A29.1(0) HLA-A(+3.849kb)       |
| rs1011263  | 4  | 114190858 | 0.0007689 | 0.03506  | 0.0008846 | ANK2(0)                            |
| rs60001529 | 3  | 142282717 | 0.0007692 | 0.04105  | 0.0008216 | ATR(0)                             |
| rs1747828  | 1  | 197758154 | 0.0007697 | 0.03795  | 0.000967  | DENND1B(+13.6kb)                   |
| rs3010691  | 9  | 81096756  | 0.0007698 | 0.03949  | 0.00082   | .                                  |
| rs446947   | 2  | 17712696  | 0.0007703 | -0.03346 | 0.0005423 | VSNL1(-9.11kb) RAD51AP2(+12.99kb)  |
| rs834513   | 2  | 17709968  | 0.0007703 | -0.03346 | 0.0005423 | VSNL1(-11.84kb) RAD51AP2(+10.26kb) |
| rs7141385  | 14 | 24155367  | 0.0007705 | 0.04     | 0.0009206 | .                                  |
| rs7277775  | 21 | 41288452  | 0.0007706 | -0.05234 | 0.0006494 | PCP4(0)                            |
| rs4815170  | 20 | 22988670  | 0.0007711 | 0.05112  | 0.0008575 | .                                  |
| rs4264049  | 1  | 204269159 | 0.0007716 | -0.03297 | 0.0005825 | PLEKHA6(0)                         |
| rs11127043 | 2  | 86738324  | 0.0007718 | 0.04085  | 0.0008417 | VPS24(0) JMJD1A(+18.48kb)          |
| rs13210984 | 6  | 7827701   | 0.0007718 | 0.1011   | 0.0007889 | BMP6(0)                            |
| rs9261483  | 6  | 30108468  | 0.000772  | -0.03504 | 0.0006302 | TRIM40(0) TRIM10(-11.26kb)         |
| rs9261455  | 6  | 30099996  | 0.0007729 | -0.03511 | 0.0006385 | TRIM40(-4.513kb) TRIM31(+19.13kb)  |
| rs2518247  | 6  | 101970214 | 0.000773  | 0.04513  | 0.0008486 | GRIK2(0)                           |
| rs341016   | 1  | 77102862  | 0.0007733 | -0.05134 | 0.0006449 | ST6GALNAC3(+6.23kb)                |
| rs1447361  | 4  | 30755643  | 0.0007734 | 0.04111  | 0.000758  | PCDH7(0)                           |
| rs12537526 | 7  | 101630597 | 0.0007736 | 0.03635  | 0.0007665 | CUX1(0)                            |
| rs7673395  | 4  | 30546791  | 0.0007753 | 0.02981  | 0.000963  | .                                  |
| rs10961651 | 9  | 14673853  | 0.0007754 | -0.03039 | 0.000775  | ZDHHC21(0)                         |
| rs10078337 | 5  | 26787638  | 0.0007755 | -0.09717 | 0.0007148 | .                                  |
| rs45604542 | 22 | 46794475  | 0.0007757 | 0.06269  | 0.0006913 | CELSR1(0)                          |
| rs6498946  | 16 | 64512058  | 0.0007758 | 0.03004  | 0.0007529 | .                                  |
| rs228689   | 1  | 7879168   | 0.0007765 | -0.05123 | 0.0007543 | PER3(0)                            |
| rs10817307 | 9  | 115034468 | 0.0007766 | 0.03277  | 0.0007351 | ROD1(0)                            |



|            |    |           |           |          |           |                            |
|------------|----|-----------|-----------|----------|-----------|----------------------------|
| rs12468530 | 2  | 49187560  | 0.0007771 | -0.04845 | 0.0007011 | FSHR(-2.091kb)             |
| rs2300442  | 2  | 49194390  | 0.0007771 | -0.04845 | 0.0007011 | FSHR(0)                    |
| rs12494268 | 3  | 64974435  | 0.0007772 | 0.0306   | 0.0009076 | .                          |
| rs34420965 | 6  | 165552708 | 0.0007783 | -0.03921 | 0.0008603 | .                          |
| rs62442105 | 6  | 165552818 | 0.0007783 | -0.03921 | 0.0008603 | .                          |
| rs3857059  | 4  | 90675238  | 0.0007789 | 0.06697  | 0.0007576 | SNCA(0)                    |
| rs11666850 | 19 | 31040983  | 0.0007792 | -0.04097 | 0.0006796 | ZNF536(0)                  |
| rs11671893 | 19 | 31041053  | 0.0007792 | -0.04097 | 0.0006796 | ZNF536(0)                  |
| rs1863560  | 2  | 17794472  | 0.0007798 | -0.03459 | 0.000576  | VSNL1(0)                   |
| rs4742946  | 9  | 108239806 | 0.0007803 | 0.03168  | 0.0008314 | FSD1L(0)                   |
| rs1519477  | 2  | 17729315  | 0.0007807 | -0.03336 | 0.0005638 | VSNL1(0)                   |
| rs6768968  | 3  | 64310844  | 0.0007814 | -0.08239 | 0.0007223 | .                          |
| rs2011812  | 2  | 11340198  | 0.0007815 | -0.02968 | 0.0006743 | ROCK2(0)                   |
| rs4500981  | 2  | 69103375  | 0.0007827 | -0.03172 | 0.0006714 | BMP10(+4.726kb)            |
| rs1334514  | 7  | 80256215  | 0.0007828 | -0.03036 | 0.0007452 | CD36(0)                    |
| rs1334517  | 7  | 80254870  | 0.0007828 | -0.1328  | 0.0007452 | CD36(0)                    |
| rs3211892  | 7  | 80290369  | 0.0007828 | -0.1328  | 0.0007339 | CD36(0)                    |
| rs643520   | 1  | 181893702 | 0.0007828 | -0.1469  | 0.0006948 | .                          |
| rs12566003 | 1  | 91101721  | 0.0007829 | -0.03268 | 0.0008312 | .                          |
| rs56042345 | 9  | 119471408 | 0.000783  | 0.04299  | 0.0006819 | TRIM32(+7.829kb) ASTN2(0)  |
| rs16853199 | 2  | 168053905 | 0.000784  | 0.1029   | 0.0008011 | XIRP2(0)                   |
| rs28875919 | 14 | 86202146  | 0.0007848 | 0.1122   | 0.0007769 | .                          |
| rs12053930 | 3  | 13870462  | 0.000785  | 0.03948  | 0.0007858 | WNT7A(0)                   |
| rs11666918 | 19 | 31034674  | 0.0007851 | -0.04093 | 0.0006835 | ZNF536(0)                  |
| rs12460433 | 19 | 31035649  | 0.0007851 | -0.04093 | 0.0006835 | ZNF536(0)                  |
| rs462481   | 21 | 40238782  | 0.0007857 | 0.09232  | 0.0007728 | FLJ45139(-10.43kb)         |
| rs13145315 | 4  | 47985571  | 0.0007863 | -0.03813 | 0.0007584 | .                          |
| rs13145327 | 4  | 47985588  | 0.0007863 | -0.03813 | 0.0007584 | .                          |
| rs2771044  | 9  | 108242839 | 0.0007863 | 0.03169  | 0.0008358 | FSD1L(0)                   |
| rs28575550 | 14 | 22186982  | 0.0007867 | -0.03261 | 0.0007742 | .                          |
| rs11673135 | 19 | 31044844  | 0.000787  | -0.04107 | 0.000685  | ZNF536(0)                  |
| rs7644138  | 3  | 60298229  | 0.0007871 | -0.04527 | 0.0009317 | FHIT(0)                    |
| rs4744411  | 9  | 97689045  | 0.0007872 | 0.03095  | 0.0009283 | C9orf3(0)                  |
| rs2290073  | 8  | 400168    | 0.0007875 | -0.04357 | 0.0007356 | FBXO25(0)                  |
| rs56103734 | 9  | 119305424 | 0.0007877 | 0.04789  | 0.0007794 | ASTN2(0)                   |
| rs12996505 | 2  | 102931802 | 0.0007878 | 0.02916  | 0.0006931 | IL1RL1(0)                  |
| rs1558621  | 2  | 102930307 | 0.0007878 | 0.02916  | 0.0006931 | IL1RL1(0)                  |
| rs11656629 | 17 | 17907768  | 0.000788  | 0.09854  | 0.0007723 | LRRC48(0) ATPAF2(-13.56kb) |
| rs11751772 | 6  | 164786977 | 0.0007882 | 0.07187  | 0.0009428 | .                          |
| rs16838435 | 4  | 6234210   | 0.0007893 | -0.03125 | 0.0006138 | .                          |
| rs11090591 | 22 | 30377313  | 0.0007911 | 0.05106  | 0.0008227 | MTMR3(0)                   |
| rs9627449  | 22 | 46805972  | 0.0007917 | 0.06247  | 0.0004743 | CELSR1(0)                  |
| rs13398926 | 2  | 49187773  | 0.0007921 | -0.04836 | 0.0007227 | FSHR(-1.878kb)             |
| rs7086835  | 10 | 128172651 | 0.0007928 | -0.0371  | 0.000718  | C10orf90(0)                |
| rs17692219 | 12 | 31121863  | 0.0007935 | 0.04391  | 0.0006955 | TSPAN11(0)                 |
| rs243785   | 6  | 54317618  | 0.0007938 | -0.07056 | 0.0006651 | .                          |
| rs4507470  | 5  | 72515051  | 0.000794  | 0.03338  | 0.0007147 | .                          |

|            |    |           |           |          |           |                            |
|------------|----|-----------|-----------|----------|-----------|----------------------------|
| rs4811627  | 20 | 54380447  | 0.0007944 | -0.03094 | 0.0008123 | .                          |
| rs12036526 | 1  | 158854489 | 0.0007947 | -0.04805 | 0.0006422 | .                          |
| rs16841264 | 1  | 158855885 | 0.0007951 | -0.04797 | 0.0006527 | .                          |
| rs35635749 | 9  | 115119843 | 0.0007959 | 0.03891  | 0.0007406 | .                          |
| rs6872767  | 5  | 54194090  | 0.0007965 | 0.09775  | 0.0008181 | .                          |
| rs1863369  | 11 | 127884548 | 0.0007974 | 0.03125  | 0.0007176 | .                          |
| rs9379612  | 6  | 23873195  | 0.0007974 | 0.07922  | 0.0004583 | .                          |
| rs2812299  | 9  | 108207907 | 0.0007976 | 0.03216  | 0.0008527 | FSD1L(-2.417kb)            |
| rs2812300  | 9  | 108207945 | 0.0007976 | 0.03216  | 0.0008527 | FSD1L(-2.379kb)            |
| rs10023265 | 4  | 118524117 | 0.0007979 | -0.1067  | 0.0007968 | .                          |
| rs1072375  | 12 | 98353351  | 0.000798  | -0.03046 | 0.0006373 | .                          |
| rs1896947  | 5  | 97050693  | 0.000798  | 0.06916  | 0.0007471 | .                          |
| rs1699376  | 4  | 130140333 | 0.0007983 | -0.03683 | 0.0008504 | .                          |
| rs9261491  | 6  | 30109861  | 0.0007983 | -0.0349  | 0.0006287 | TRIM40(0) TRIM10(-9.862kb) |
| rs2759661  | 1  | 197363308 | 0.0007985 | 0.03641  | 0.000784  | CRB1(0)                    |
| rs12732352 | 1  | 210814925 | 0.0007986 | 0.04698  | 0.000824  | HHAT(0)                    |
| rs17366643 | 2  | 11344504  | 0.0007993 | -0.0296  | 0.0006902 | ROCK2(0)                   |
| rs11679191 | 2  | 102926800 | 0.0007995 | 0.02905  | 0.0007012 | IL1RL1(-1.161kb)           |
| rs62322961 | 4  | 136208013 | 0.0008    | 0.03362  | 0.0009069 | .                          |
| rs11621681 | 14 | 103714829 | 0.0008006 | 0.03043  | 0.0009402 | .                          |
| rs10961652 | 9  | 14674574  | 0.0008007 | -0.03032 | 0.0007988 | ZDHC21(0)                  |
| rs4854517  | 2  | 69019272  | 0.0008014 | 0.05001  | 0.0004646 | ARHGAP25(0)                |
| rs2844778  | 6  | 30205991  | 0.0008015 | -0.03212 | 0.0006297 | .                          |
| rs17020020 | 2  | 81408132  | 0.0008018 | 0.05968  | 0.0009383 | .                          |
| rs6444269  | 3  | 187810262 | 0.0008025 | 0.03024  | 0.0005624 | .                          |
| rs2021366  | 6  | 30206991  | 0.0008029 | -0.03214 | 0.0006356 | .                          |
| rs4959046  | 6  | 30207639  | 0.0008029 | -0.03214 | 0.0006356 | FLJ45422(-19.73kb)         |
| rs2191186  | 12 | 126782566 | 0.0008032 | -0.02924 | 0.0007097 | .                          |
| rs2189904  | 7  | 8546126   | 0.0008039 | 0.03268  | 0.0006884 | NXP1(0)                    |
| rs12489309 | 3  | 68565190  | 0.0008046 | 0.03345  | 0.000966  | FAM19A1(0)                 |
| rs7227022  | 18 | 10705744  | 0.0008046 | 0.03052  | 0.0007248 | FAM38B(+7.93kb)            |
| rs7820781  | 8  | 92055426  | 0.0008046 | 0.04718  | 0.0008461 | TMEM55A(+2.378kb)          |
| rs12599138 | 16 | 64712109  | 0.000805  | 0.03119  | 0.0005971 | .                          |
| rs6850392  | 4  | 14565989  | 0.0008055 | 0.03631  | 0.0008987 | .                          |
| rs6992064  | 8  | 89733157  | 0.000806  | -0.03697 | 0.0007739 | .                          |
| rs9802263  | 9  | 97705927  | 0.0008061 | -0.03039 | 0.0007759 | C9orf3(0)                  |
| rs34058238 | 4  | 14489785  | 0.0008063 | 0.04116  | 0.0008589 | .                          |
| rs1372511  | 4  | 90811049  | 0.0008066 | 0.05845  | 0.0008196 | MMRN1(-5.002kb)            |
| rs10443934 | 10 | 66839615  | 0.0008069 | 0.03057  | 0.000831  | .                          |
| rs2771039  | 9  | 108221252 | 0.000807  | 0.04669  | 0.000851  | FSD1L(0)                   |
| rs7548690  | 1  | 108033019 | 0.000807  | 0.03206  | 0.0006646 | NTNG1(+8.544kb)            |
| rs8017847  | 14 | 22185846  | 0.0008074 | -0.0324  | 0.0007968 | .                          |
| rs3845443  | 1  | 181662844 | 0.0008076 | -0.04126 | 0.0006934 | CACNA1E(0)                 |
| rs17705482 | 15 | 36835788  | 0.0008086 | -0.03596 | 0.0009494 | .                          |
| rs36148580 | 5  | 124469535 | 0.000809  | 0.06842  | 0.000819  | .                          |
| rs953934   | 2  | 102932293 | 0.0008091 | 0.02912  | 0.0007019 | IL1RL1(0)                  |
| rs2898622  | 5  | 106820247 | 0.0008093 | -0.1121  | 0.0007557 | EFNA5(0)                   |

|            |    |           |           |          |           |                                  |
|------------|----|-----------|-----------|----------|-----------|----------------------------------|
| rs2129622  | 6  | 98595713  | 0.00081   | 0.04789  | 0.0005839 | .                                |
| rs10124026 | 9  | 14663550  | 0.0008121 | 0.03255  | 0.000828  | ZDHC21(0)                        |
| rs11667057 | 19 | 31034308  | 0.0008122 | -0.03297 | 0.0007106 | ZNF536(0)                        |
| rs6673447  | 1  | 204264542 | 0.0008122 | -0.04078 | 0.0006086 | PLEKHA6(0)                       |
| rs11645219 | 16 | 9912643   | 0.000813  | -0.03403 | 0.0007716 | GRIN2A(0)                        |
| rs35788173 | 16 | 9913360   | 0.000813  | -0.03403 | 0.0007716 | GRIN2A(0)                        |
| rs17019212 | 1  | 108028555 | 0.0008131 | 0.04665  | 0.0006648 | NTNG1(+4.08kb)                   |
| rs12828383 | 12 | 77531371  | 0.0008139 | 0.05029  | 0.0004355 | .                                |
| rs62361398 | 5  | 72529325  | 0.0008139 | 0.03235  | 0.0007505 | .                                |
| rs4457052  | 5  | 72528922  | 0.0008142 | 0.03235  | 0.0007508 | .                                |
| rs2059816  | 19 | 52921906  | 0.0008143 | 0.04711  | 0.0009721 | ZNF528(+0.249kb)                 |
| rs34267943 | 8  | 57512391  | 0.0008148 | 0.04238  | 0.0006158 | .                                |
| rs60457614 | 5  | 59615883  | 0.000815  | 0.08724  | 0.0008409 | .                                |
| rs6814228  | 4  | 14558302  | 0.0008154 | 0.0366   | 0.0006996 | .                                |
| rs6571149  | 6  | 104342568 | 0.0008155 | 0.04589  | 0.000672  | .                                |
| rs6930308  | 6  | 104342799 | 0.0008155 | 0.04589  | 0.000672  | .                                |
| rs9373735  | 6  | 104339429 | 0.0008155 | 0.04589  | 0.000672  | .                                |
| rs9404488  | 6  | 104341797 | 0.0008155 | 0.04589  | 0.000672  | .                                |
| rs1032466  | 14 | 51074461  | 0.0008156 | -0.03174 | 0.0009893 | SPG3A(0)                         |
| rs6551051  | 3  | 26171661  | 0.000816  | -0.03771 | 0.0009014 | .                                |
| rs10950393 | 7  | 12263546  | 0.0008166 | -0.03044 | 0.000713  | TMEM106B(0)                      |
| rs2648830  | 8  | 129150396 | 0.0008168 | -0.07731 | 0.0007563 | .                                |
| rs10182639 | 2  | 102935805 | 0.0008171 | 0.02905  | 0.0007149 | IL1RL1(0)                        |
| rs11690443 | 2  | 102936131 | 0.0008171 | 0.02905  | 0.0007149 | IL1RL1(0)                        |
| rs4613307  | 2  | 102933758 | 0.0008171 | 0.02905  | 0.0007149 | IL1RL1(0)                        |
| rs11724257 | 4  | 104911820 | 0.0008173 | 0.1294   | 0.0007946 | .                                |
| rs9409062  | 9  | 108240261 | 0.0008175 | 0.03156  | 0.0008754 | FSD1L(0)                         |
| rs3815080  | 6  | 30114101  | 0.0008176 | -0.0347  | 0.0006488 | TRIM15(-16.88kb) TRIM40(0) TRIM1 |
| rs12000902 | 9  | 85953535  | 0.0008183 | 0.03474  | 0.0009545 | FRMD3(0)                         |
| rs11965487 | 6  | 69983212  | 0.0008185 | 0.05566  | 0.0008458 | BAI3(0)                          |
| rs11097533 | 4  | 97890868  | 0.0008187 | -0.03173 | 0.0007791 | .                                |
| rs11240726 | 1  | 204319318 | 0.0008187 | 0.07344  | 0.0005667 | PLEKHA6(0)                       |
| rs9995022  | 4  | 47945814  | 0.0008191 | -0.03711 | 0.0007905 | CNGA1(0)                         |
| rs4595944  | 2  | 11352149  | 0.0008198 | -0.02962 | 0.0007034 | ROCK2(0)                         |
| rs1420090  | 2  | 102919305 | 0.0008211 | 0.02929  | 0.0006984 | IL1RL1(-8.656kb)                 |
| rs1285859  | 14 | 91691354  | 0.0008212 | 0.1486   | 0.0008095 | GPR68(-7.521kb) C14orf159(0)     |
| rs834835   | 2  | 157188145 | 0.0008212 | -0.0335  | 0.0007593 | NR4A2(0)                         |
| rs12466152 | 2  | 149049456 | 0.0008213 | 0.1394   | 0.0003201 | .                                |
| rs55708352 | 2  | 86741441  | 0.0008215 | 0.04063  | 0.0008821 | VPS24(0)                         |
| rs4427828  | 16 | 64657461  | 0.0008217 | 0.0304   | 0.0006433 | .                                |
| rs56199929 | 19 | 31033240  | 0.0008217 | -0.04069 | 0.0007248 | ZNF536(0)                        |
| rs974389   | 2  | 102936981 | 0.0008219 | 0.02904  | 0.0007194 | IL1RL1(0)                        |
| rs1032128  | 8  | 119951773 | 0.000822  | -0.07496 | 0.0007414 | TNFRSF11B(0)                     |
| rs208822   | 20 | 37469256  | 0.000822  | -0.03388 | 0.00073   | PPP1R16B(0)                      |
| rs13020793 | 2  | 102931926 | 0.0008225 | 0.02904  | 0.0007191 | IL1RL1(0)                        |
| rs1558619  | 2  | 102931550 | 0.0008225 | 0.02904  | 0.0007191 | IL1RL1(0)                        |
| rs4915542  | 1  | 201554246 | 0.0008226 | 0.07055  | 0.000853  | .                                |

|            |    |           |           |          |           |                                  |
|------------|----|-----------|-----------|----------|-----------|----------------------------------|
| rs8101081  | 19 | 31049031  | 0.0008227 | -0.04145 | 0.0007093 | ZNF536(+0.066kb)                 |
| rs8051822  | 16 | 64648149  | 0.0008231 | 0.03054  | 0.0006634 | .                                |
| rs1049724  | 6  | 31236862  | 0.0008235 | 0.08247  | 0.0008196 | HLA-C(0)                         |
| rs5011438  | 7  | 12268798  | 0.0008236 | -0.03055 | 0.0007406 | TMEM106B(0)                      |
| rs5011439  | 7  | 12268811  | 0.0008236 | -0.03055 | 0.0007406 | TMEM106B(0)                      |
| rs1414193  | 21 | 32735584  | 0.000824  | 0.03263  | 0.000975  | TIAM1(0)                         |
| rs9408799  | 9  | 108243725 | 0.0008249 | 0.03152  | 0.0008811 | FSD1L(0)                         |
| rs17114571 | 5  | 152836468 | 0.0008255 | 0.08711  | 0.0007692 | .                                |
| rs2332918  | 14 | 73272647  | 0.0008258 | -0.08257 | 0.0007143 | DPF3(0)                          |
| rs853259   | 3  | 64314658  | 0.0008258 | -0.08199 | 0.0007668 | .                                |
| rs1078620  | 16 | 53664597  | 0.0008264 | -0.07644 | 0.000766  | RPGRIP1L(0)                      |
| rs10150357 | 14 | 22185875  | 0.0008265 | -0.03251 | 0.0007965 | .                                |
| rs6819506  | 4  | 47945455  | 0.0008271 | -0.03726 | 0.0007895 | CNGA1(0)                         |
| rs1387790  | 5  | 143152466 | 0.0008274 | 0.03438  | 0.0007554 | .                                |
| rs12623421 | 2  | 76736017  | 0.0008275 | 0.02944  | 0.0005681 | .                                |
| rs4713306  | 6  | 30254495  | 0.0008288 | 0.06538  | 0.0005619 | FLJ45422(+19.77kb)               |
| rs11852779 | 15 | 25084035  | 0.000829  | -0.05053 | 0.0007788 | SNRPN(0)                         |
| rs10233230 | 7  | 8544878   | 0.0008295 | 0.03248  | 0.0006709 | NXPH1(0)                         |
| rs62072791 | 17 | 16514057  | 0.0008299 | 0.05594  | 0.0008729 | ZNF624(-9.99kb)                  |
| rs12636077 | 3  | 38525588  | 0.00083   | 0.1023   | 0.0008701 | ENDOGL1(-12.24kb) ACVR2B(0)      |
| rs6543118  | 2  | 102929469 | 0.0008301 | 0.02907  | 0.0007281 | IL1RL1(0)                        |
| rs7804796  | 7  | 127953243 | 0.0008301 | 0.06181  | 0.0008443 | RBM28(0)                         |
| rs6577970  | 8  | 139945856 | 0.0008303 | 0.05566  | 0.0008004 | COL22A1(+19.62kb)                |
| rs10148566 | 14 | 22175621  | 0.0008306 | -0.03558 | 0.0008046 | .                                |
| rs3767001  | 1  | 181712376 | 0.0008309 | -0.04059 | 0.0007373 | CACNA1E(0)                       |
| rs17150410 | 7  | 8562722   | 0.0008311 | 0.03397  | 0.0009023 | NXPH1(0)                         |
| rs62574188 | 9  | 119464286 | 0.0008312 | 0.04277  | 0.0007259 | TRIM32(+0.707kb) ASTN2(0)        |
| rs9483557  | 6  | 133492507 | 0.0008313 | -0.03847 | 0.0009219 | .                                |
| rs1334518  | 7  | 80226174  | 0.0008315 | 0.02925  | 0.0007998 | CD36(-5.329kb)                   |
| rs4399750  | 2  | 102917788 | 0.0008315 | -0.1287  | 0.000705  | IL1RL1(-10.17kb)                 |
| rs12000067 | 9  | 31438507  | 0.0008317 | -0.08611 | 0.000805  | .                                |
| rs2903654  | 4  | 14494544  | 0.0008321 | 0.04104  | 0.0008887 | .                                |
| rs9261513  | 6  | 30115484  | 0.0008321 | -0.03474 | 0.0006744 | TRIM15(-15.5kb) TRIM40(0) TRIM10 |
| rs11872713 | 18 | 50547541  | 0.0008322 | 0.0427   | 0.0009412 | DCC(0)                           |
| rs12705351 | 7  | 77862903  | 0.0008324 | 0.031    | 0.0008459 | MAGI2(0)                         |
| rs2938892  | 9  | 81096490  | 0.0008327 | 0.03924  | 0.0008852 | .                                |
| rs2555087  | 2  | 17793697  | 0.000833  | -0.0344  | 0.0006131 | VSNL1(0)                         |
| rs4695316  | 4  | 47940555  | 0.000833  | -0.03716 | 0.0008006 | CNGA1(0)                         |
| rs12002795 | 9  | 115058346 | 0.0008335 | 0.03213  | 0.0007663 | ROD1(0)                          |
| rs3010688  | 9  | 81092998  | 0.0008337 | 0.03923  | 0.0008942 | .                                |
| rs13156333 | 5  | 7110187   | 0.0008341 | -0.03044 | 0.0006934 | .                                |
| rs12622031 | 2  | 62741388  | 0.0008344 | -0.03504 | 0.0008792 | TMEM17(+7.912kb)                 |
| rs834371   | 6  | 18986962  | 0.0008349 | -0.03282 | 0.0009524 | .                                |
| rs16877896 | 5  | 59606015  | 0.0008357 | 0.08705  | 0.0008634 | .                                |
| rs16877898 | 5  | 59606247  | 0.0008357 | 0.08705  | 0.0008634 | .                                |
| rs16877901 | 5  | 59606508  | 0.0008357 | 0.08705  | 0.0008634 | .                                |
| rs6742187  | 2  | 63991959  | 0.000837  | -0.02987 | 0.0007627 | .                                |

|            |    |           |           |          |           |                                  |
|------------|----|-----------|-----------|----------|-----------|----------------------------------|
| rs1511047  | 1  | 214863137 | 0.0008373 | 0.03032  | 0.000879  | .                                |
| rs4900981  | 14 | 50520782  | 0.000838  | -0.03751 | 0.0007355 | .                                |
| rs1972883  | 4  | 47951945  | 0.0008382 | -0.03701 | 0.0008159 | CNGA1(0)                         |
| rs16868209 | 4  | 14556388  | 0.0008385 | 0.03643  | 0.0007224 | .                                |
| rs16890639 | 4  | 14553195  | 0.0008385 | 0.03643  | 0.0007224 | .                                |
| rs7298169  | 12 | 68854225  | 0.0008388 | 0.04655  | 0.0009819 | .                                |
| rs10876477 | 12 | 54053246  | 0.0008389 | -0.03942 | 0.0005734 | ATP5G2(-5.697kb)                 |
| rs34832791 | 8  | 96706578  | 0.0008392 | -0.06865 | 0.0007763 | .                                |
| rs10759267 | 9  | 110687247 | 0.0008398 | 0.03954  | 0.0005799 | .                                |
| rs1518812  | 2  | 86715696  | 0.0008401 | 0.04048  | 0.0008965 | VPS24(-14.86kb) JMJD1A(0)        |
| rs1741611  | 20 | 62133549  | 0.0008402 | 0.06193  | 0.0008847 | EEF1A2(+3.044kb) C20orf149(-18.5 |
| rs34735920 | 5  | 124459619 | 0.0008403 | 0.06964  | 0.0008201 | .                                |
| rs11894545 | 2  | 126828623 | 0.0008404 | 0.03394  | 0.0009325 | .                                |
| rs35817588 | 2  | 126817773 | 0.0008404 | 0.03394  | 0.0009325 | .                                |
| rs4467276  | 2  | 126838204 | 0.0008404 | 0.03394  | 0.0009325 | .                                |
| rs4371172  | 16 | 64671417  | 0.0008421 | 0.03035  | 0.0006749 | .                                |
| rs2074472  | 6  | 30156496  | 0.0008431 | -0.03215 | 0.0006615 | TRIM15(+16.02kb) TRIM26(0)       |
| rs17692279 | 12 | 31124382  | 0.0008432 | 0.04525  | 0.0007268 | TSPAN11(0)                       |
| rs16796    | 19 | 31030768  | 0.0008437 | -0.04223 | 0.0007072 | ZNF536(0)                        |
| rs7186408  | 16 | 64631140  | 0.0008441 | 0.03012  | 0.000671  | .                                |
| rs8062529  | 16 | 64625384  | 0.0008441 | 0.03012  | 0.000671  | .                                |
| rs58484838 | 16 | 77783137  | 0.0008445 | 0.0511   | 0.000877  | NUDT7(+6.983kb)                  |
| rs59045389 | 16 | 77782863  | 0.0008445 | 0.0511   | 0.000877  | NUDT7(+6.709kb)                  |
| rs28534780 | 7  | 101632234 | 0.0008453 | 0.0365   | 0.0008086 | CUX1(0)                          |
| rs4529785  | 1  | 204270124 | 0.0008463 | -0.02955 | 0.0009143 | PLEKHA6(0)                       |
| rs5011434  | 7  | 12268717  | 0.0008466 | -0.03048 | 0.0007607 | TMEM106B(0)                      |
| rs5011437  | 7  | 12268792  | 0.0008466 | -0.03048 | 0.0007607 | TMEM106B(0)                      |
| rs12469443 | 2  | 61797065  | 0.0008467 | 0.07198  | 0.0005389 | .                                |
| rs12475018 | 2  | 61794702  | 0.0008467 | 0.07198  | 0.0005389 | .                                |
| rs60801721 | 2  | 61796047  | 0.0008467 | 0.07198  | 0.0005389 | .                                |
| rs11685480 | 2  | 102927086 | 0.0008477 | 0.02894  | 0.0007418 | IL1RL1(-0.875kb)                 |
| rs59578756 | 5  | 59640969  | 0.0008477 | 0.08747  | 0.0008694 | .                                |
| rs13336965 | 16 | 64624488  | 0.0008488 | 0.03014  | 0.0006813 | .                                |
| rs17405517 | 1  | 204264047 | 0.0008489 | -0.03286 | 0.0006389 | PLEKHA6(0)                       |
| rs56226949 | 6  | 158430173 | 0.000849  | 0.07064  | 0.0009325 | SYNJ2(0)                         |
| rs35556565 | 16 | 26514383  | 0.0008493 | 0.02994  | 0.0009702 | .                                |
| rs335561   | 1  | 214865123 | 0.0008494 | 0.03009  | 0.0009865 | .                                |
| rs6572641  | 14 | 50518636  | 0.0008499 | -0.03713 | 0.0007552 | .                                |
| rs697469   | 6  | 166379480 | 0.0008499 | 0.03492  | 0.0008727 | .                                |
| rs62324422 | 4  | 136172312 | 0.0008512 | 0.03241  | 0.0009385 | .                                |
| rs4354157  | 6  | 102903245 | 0.0008528 | 0.03647  | 0.00073   | .                                |
| rs2966034  | 16 | 77785100  | 0.0008555 | 0.05079  | 0.0009146 | NUDT7(+8.946kb)                  |
| rs12600350 | 17 | 53159927  | 0.0008558 | 0.03759  | 0.0006881 | STXBP4(0)                        |
| rs12603606 | 17 | 53159401  | 0.0008558 | 0.03759  | 0.0006881 | STXBP4(0)                        |
| rs4480955  | 2  | 183376633 | 0.0008559 | -0.03065 | 0.0009746 | PDE1A(0)                         |
| rs6809925  | 3  | 64973751  | 0.0008562 | 0.03037  | 0.0009992 | .                                |
| rs1993692  | 4  | 136167677 | 0.0008568 | 0.03261  | 0.0008743 | .                                |

|            |    |           |           |          |           |                                  |
|------------|----|-----------|-----------|----------|-----------|----------------------------------|
| rs6969617  | 7  | 12218360  | 0.0008569 | 0.03462  | 0.0008702 | .                                |
| rs17542364 | 1  | 68643922  | 0.0008571 | 0.05699  | 0.0008864 | GPR177(0)                        |
| rs4688536  | 3  | 65026854  | 0.0008571 | 0.03174  | 0.0009361 | .                                |
| rs893466   | 10 | 9183178   | 0.0008574 | -0.116   | 0.0007601 | .                                |
| rs7336179  | 13 | 26297181  | 0.0008579 | 0.04666  | 0.0005305 | ATP8A2(0)                        |
| rs57340047 | 2  | 53548395  | 0.0008586 | -0.03049 | 0.0006474 | .                                |
| rs1147176  | 8  | 57548125  | 0.0008593 | 0.04277  | 0.000666  | .                                |
| rs828177   | 8  | 57550876  | 0.0008593 | 0.04277  | 0.000666  | .                                |
| rs871330   | 3  | 193474795 | 0.0008595 | 0.03773  | 0.000952  | .                                |
| rs9404487  | 6  | 104337146 | 0.0008595 | 0.04569  | 0.0007094 | .                                |
| rs4130444  | 5  | 59593726  | 0.0008605 | 0.0868   | 0.0008935 | .                                |
| rs9404492  | 6  | 104356232 | 0.0008609 | 0.04808  | 0.0006689 | .                                |
| rs4949107  | 16 | 64676684  | 0.000861  | 0.03034  | 0.0007043 | .                                |
| rs11123918 | 2  | 102935237 | 0.0008612 | 0.02897  | 0.0007512 | IL1RL1(0)                        |
| rs9322401  | 6  | 153268605 | 0.000862  | -0.03324 | 0.0007883 | .                                |
| rs58641063 | 16 | 69376150  | 0.0008626 | 0.05753  | 0.0006199 | VPS4A(+17.2kb) TMED6(-1.009kb) T |
| rs10761913 | 10 | 66843627  | 0.0008628 | 0.0302   | 0.0008803 | .                                |
| rs34332066 | 9  | 31444849  | 0.0008633 | 0.09168  | 0.0008554 | .                                |
| rs17097568 | 12 | 47460381  | 0.0008636 | 0.05982  | 0.0008865 | AMIGO2(-9.108kb)                 |
| rs33997182 | 17 | 17921995  | 0.0008642 | 0.09587  | 0.0008508 | LRRC48(+1.806kb) ATPAF2(0)       |
| rs834829   | 2  | 157200849 | 0.0008646 | -0.0336  | 0.0007721 | NR4A2(+11.56kb)                  |
| rs2771045  | 9  | 108243493 | 0.0008648 | 0.03152  | 0.0009176 | FSD1L(0)                         |
| rs7987148  | 13 | 26250177  | 0.000865  | 0.03051  | 0.0006386 | ATP8A2(0)                        |
| rs2975045  | 6  | 29917496  | 0.0008657 | -0.03146 | 0.0007404 | HLA-A29.1(0) HLA-A(+3.842kb)     |
| rs2629134  | 3  | 10918676  | 0.0008658 | -0.03054 | 0.0009608 | SLC6A11(0)                       |
| rs6594005  | 1  | 204312033 | 0.0008661 | 0.02962  | 0.0008847 | PLEKHA6(0)                       |
| rs2481573  | 9  | 31468923  | 0.0008664 | 0.08153  | 0.0009068 | .                                |
| rs4796902  | 18 | 10708598  | 0.0008667 | 0.03325  | 0.0007761 | FAM38B(+10.78kb)                 |
| rs10195036 | 2  | 49197118  | 0.0008668 | -0.04797 | 0.0007827 | FSHR(0)                          |
| rs10938508 | 4  | 47948895  | 0.0008674 | -0.03701 | 0.0008351 | CNGA1(0)                         |
| rs16900620 | 6  | 70003822  | 0.0008675 | 0.04958  | 0.0008783 | BAI3(0)                          |
| rs9261527  | 6  | 30119392  | 0.0008676 | -0.03459 | 0.0006902 | TRIM15(-11.59kb) TRIM40(+2.88kb) |
| rs2275338  | 6  | 154731970 | 0.000868  | 0.07889  | 0.0008806 | CNKSR3(0)                        |
| rs9594715  | 13 | 42805394  | 0.0008681 | 0.04187  | 0.0009255 | DGKH(+1.506kb)                   |
| rs11215385 | 11 | 115024858 | 0.0008682 | 0.03413  | 0.0009662 | CADM1(-19.49kb)                  |
| rs6833320  | 4  | 47917441  | 0.0008684 | -0.03692 | 0.0008459 | NFXL1(+0.808kb)                  |
| rs2253163  | 6  | 30209062  | 0.0008686 | -0.03209 | 0.0006879 | FLJ45422(-18.31kb)               |
| rs2253164  | 6  | 30209068  | 0.0008686 | -0.03209 | 0.0006879 | FLJ45422(-18.3kb)                |
| rs10140632 | 14 | 50521200  | 0.0008697 | -0.03726 | 0.0007585 | .                                |
| rs28749159 | 6  | 29916765  | 0.0008697 | -0.03177 | 0.0007293 | HLA-A29.1(0) HLA-A(+3.111kb)     |
| rs4982326  | 14 | 21157936  | 0.0008698 | -0.04744 | 0.000777  | RNASE4(0) ANG(0)                 |
| rs6053925  | 20 | 6114257   | 0.0008702 | 0.03012  | 0.000968  | FERMT1(+10.07kb)                 |
| rs6498953  | 16 | 64662522  | 0.0008702 | -0.05306 | 0.0006918 | .                                |
| rs1054169  | 7  | 12273496  | 0.0008713 | -0.03024 | 0.0007487 | TMEM106B(0)                      |
| rs4241345  | 2  | 69111303  | 0.0008722 | -0.03179 | 0.0007603 | BMP10(+12.65kb)                  |
| rs10484551 | 6  | 30256838  | 0.0008727 | 0.06521  | 0.0005797 | .                                |
| rs971764   | 2  | 102938335 | 0.0008733 | 0.02898  | 0.0007636 | IL1RL1(0)                        |

|            |    |           |           |          |           |                                   |
|------------|----|-----------|-----------|----------|-----------|-----------------------------------|
| rs56227180 | 2  | 86787598  | 0.0008734 | 0.04067  | 0.0009279 | VPS24(0)                          |
| rs34190797 | 5  | 124462484 | 0.0008735 | 0.06807  | 0.0008717 | .                                 |
| rs1855394  | 13 | 88704507  | 0.0008736 | -0.03999 | 0.0006389 | .                                 |
| rs7184325  | 16 | 9906082   | 0.0008737 | -0.03373 | 0.0008146 | GRIN2A(0)                         |
| rs17862968 | 4  | 118540680 | 0.0008741 | -0.03745 | 0.0008229 | .                                 |
| rs6717227  | 2  | 226013860 | 0.0008741 | -0.08464 | 0.0007744 | .                                 |
| rs17045527 | 2  | 116896503 | 0.0008749 | -0.03801 | 0.0009845 | .                                 |
| rs17492076 | 2  | 116896513 | 0.0008749 | -0.03801 | 0.0009845 | .                                 |
| rs1550444  | 4  | 47952947  | 0.0008755 | -0.03684 | 0.0008582 | CNGA1(0)                          |
| rs1888504  | 21 | 41295673  | 0.0008756 | 0.03035  | 0.0006204 | PCP4(0)                           |
| rs4713304  | 6  | 30252370  | 0.0008759 | 0.06553  | 0.000577  | FLJ45422(+17.64kb)                |
| rs17763954 | 3  | 8342581   | 0.0008763 | -0.03365 | 0.0009125 | .                                 |
| rs6497520  | 16 | 9906218   | 0.0008763 | 0.03983  | 0.0008517 | GRIN2A(0)                         |
| rs4352710  | 6  | 104343800 | 0.0008766 | 0.04446  | 0.0007213 | .                                 |
| rs11939515 | 4  | 156994264 | 0.0008769 | 0.07303  | 0.0009086 | .                                 |
| rs2698780  | 10 | 134158542 | 0.000877  | 0.03057  | 0.0008729 | LRRC27(0)                         |
| rs2729124  | 3  | 1122130   | 0.000877  | 0.03456  | 0.0005141 | CNTN6(-12.5kb)                    |
| rs10850625 | 12 | 116840200 | 0.0008775 | -0.0299  | 0.0008161 | .                                 |
| rs17016188 | 4  | 90721880  | 0.0008775 | 0.06572  | 0.0009043 | SNCA(0)                           |
| rs17016193 | 4  | 90726022  | 0.0008775 | 0.06572  | 0.0009043 | SNCA(0)                           |
| rs6532190  | 4  | 90719196  | 0.0008775 | 0.06572  | 0.0009043 | SNCA(0)                           |
| rs1468802  | 7  | 12276011  | 0.0008781 | 0.04669  | 0.0007401 | TMEM106B(0)                       |
| rs218768   | 4  | 14428501  | 0.0008781 | -0.03032 | 0.0006803 | .                                 |
| rs1873703  | 8  | 143201068 | 0.0008785 | -0.0324  | 0.0008166 | .                                 |
| rs6915474  | 6  | 154731898 | 0.0008789 | 0.07883  | 0.0008886 | CNKSR3(0)                         |
| rs1011861  | 2  | 142861471 | 0.0008797 | -0.04231 | 0.0008175 | LRP1B(0)                          |
| rs11728805 | 4  | 153135952 | 0.0008802 | -0.05214 | 0.0007719 | .                                 |
| rs62575102 | 9  | 108258572 | 0.0008804 | 0.0314   | 0.0009328 | FSD1L(0)                          |
| rs889859   | 2  | 53553341  | 0.0008808 | -0.03029 | 0.0006746 | .                                 |
| rs17251199 | 18 | 73685144  | 0.0008812 | -0.05152 | 0.0007727 | .                                 |
| rs11240727 | 1  | 204319499 | 0.0008817 | -0.03148 | 0.0006295 | PLEKHA6(0)                        |
| rs1572230  | 7  | 80259082  | 0.0008818 | -0.1298  | 0.0008432 | CD36(0)                           |
| rs4628878  | 14 | 22179843  | 0.0008824 | -0.0325  | 0.0008385 | .                                 |
| rs7158141  | 14 | 22179091  | 0.0008824 | -0.0325  | 0.0008385 | .                                 |
| rs4770199  | 13 | 22346941  | 0.0008827 | 0.1239   | 0.0008788 | .                                 |
| rs1353171  | 8  | 119872998 | 0.0008836 | -0.03132 | 0.000741  | .                                 |
| rs28759016 | 15 | 73220062  | 0.0008841 | -0.04157 | 0.0006355 | .                                 |
| rs35998247 | 9  | 115133293 | 0.0008843 | 0.03994  | 0.0008296 | HSDL2(-9.057kb)                   |
| rs9261525  | 6  | 30118128  | 0.0008844 | -0.03457 | 0.0006992 | TRIM15(-12.85kb) TRIM40(+1.616kb) |
| rs4949075  | 16 | 64669879  | 0.000885  | 0.03005  | 0.000705  | .                                 |
| rs1862500  | 16 | 26519239  | 0.0008859 | 0.03031  | 0.0009786 | .                                 |
| rs1862501  | 16 | 26519254  | 0.0008859 | 0.03031  | 0.0009786 | .                                 |
| rs10891328 | 11 | 112009125 | 0.0008867 | -0.0312  | 0.0009138 | IL18(-4.85kb)                     |
| rs1430741  | 1  | 68654276  | 0.0008874 | 0.05641  | 0.0009195 | GPR177(0)                         |
| rs4936320  | 11 | 115034440 | 0.0008879 | 0.03367  | 0.000978  | CADM1(-9.904kb)                   |
| rs1072175  | 12 | 91483152  | 0.0008882 | 0.03291  | 0.0008705 | LUM(-14.08kb)                     |
| rs4513515  | 4  | 156993558 | 0.0008887 | 0.07288  | 0.000929  | .                                 |

|            |    |           |           |          |           |                                   |
|------------|----|-----------|-----------|----------|-----------|-----------------------------------|
| rs12598352 | 16 | 7272732   | 0.0008894 | 0.03003  | 0.0007674 | A2BP1(0)                          |
| rs7202759  | 16 | 64666932  | 0.0008894 | 0.03003  | 0.0007115 | .                                 |
| rs9931297  | 16 | 64664907  | 0.0008894 | 0.03003  | 0.0007115 | .                                 |
| rs9931299  | 16 | 64664921  | 0.0008894 | -0.03146 | 0.0007115 | .                                 |
| rs4325586  | 16 | 64642755  | 0.0008895 | 0.03005  | 0.0007072 | .                                 |
| rs4378638  | 16 | 64634301  | 0.0008895 | 0.03005  | 0.0007072 | .                                 |
| rs4407081  | 16 | 64659044  | 0.0008895 | 0.03005  | 0.0007072 | .                                 |
| rs62039887 | 16 | 64637759  | 0.0008895 | 0.03005  | 0.0007072 | .                                 |
| rs8057368  | 16 | 64641721  | 0.0008895 | 0.03005  | 0.0007072 | .                                 |
| rs35975765 | 2  | 142867247 | 0.0008901 | -0.04176 | 0.0007888 | LRP1B(0)                          |
| rs16833771 | 3  | 122727547 | 0.0008903 | -0.07261 | 0.0008495 | SEMA5B(0)                         |
| rs2285799  | 6  | 30257693  | 0.0008911 | -0.03284 | 0.0005878 | .                                 |
| rs7539690  | 1  | 204286540 | 0.0008911 | 0.06514  | 0.0006431 | PLEKHA6(0)                        |
| rs4578668  | 16 | 64636137  | 0.0008916 | 0.03004  | 0.00071   | .                                 |
| rs12712135 | 2  | 102930948 | 0.0008918 | 0.02901  | 0.0007721 | IL1RL1(0)                         |
| rs11696073 | 2  | 126820026 | 0.0008919 | 0.03393  | 0.0009994 | .                                 |
| rs1384831  | 8  | 51560905  | 0.0008927 | -0.04237 | 0.0007341 | SNTG1(0)                          |
| rs7606831  | 2  | 226034791 | 0.0008931 | -0.03745 | 0.0007859 | .                                 |
| rs17519738 | 13 | 42705921  | 0.0008935 | 0.04148  | 0.0009586 | DGKH(0)                           |
| rs9315892  | 13 | 42704155  | 0.0008935 | 0.04148  | 0.0009586 | DGKH(0)                           |
| rs1530349  | 18 | 72836420  | 0.0008939 | 0.05675  | 0.0009248 | .                                 |
| rs6436528  | 2  | 226026239 | 0.0008944 | -0.0363  | 0.0008134 | .                                 |
| rs7395672  | 11 | 65488982  | 0.0008945 | -0.02886 | 0.0008195 | RNASEH2C(+0.573kb) KAT5(+1.907kb) |
| rs2282046  | 14 | 21945415  | 0.0008946 | -0.03023 | 0.0007389 | TOX4(0) RAB2B(+0.294kb)           |
| rs10189711 | 2  | 102930881 | 0.0008947 | 0.02886  | 0.000781  | IL1RL1(0)                         |
| rs1003207  | 2  | 86815355  | 0.0008955 | 0.04023  | 0.0009664 | RNF103(-15.16kb)                  |
| rs4861574  | 4  | 179769492 | 0.0008958 | 0.07644  | 0.0008526 | .                                 |
| rs17150479 | 7  | 8564134   | 0.0008961 | 0.03431  | 0.0008535 | NXP1(0)                           |
| rs12816531 | 12 | 77532958  | 0.0008964 | 0.04974  | 0.0004855 | .                                 |
| rs4522437  | 16 | 64628747  | 0.000897  | 0.03011  | 0.0007547 | .                                 |
| rs9373734  | 6  | 104336014 | 0.0008983 | 0.04558  | 0.0007388 | .                                 |
| rs9386393  | 6  | 104335898 | 0.0008983 | 0.04558  | 0.0007388 | .                                 |
| rs1484773  | 17 | 53141001  | 0.0008995 | 0.03744  | 0.0007236 | STXBP4(0)                         |
| rs2968605  | 2  | 36143201  | 0.0008996 | -0.05012 | 0.0008157 | .                                 |
| rs1485286  | 8  | 119950668 | 0.0008999 | -0.0342  | 0.000781  | TNFRSF11B(0)                      |
| rs218760   | 4  | 14423713  | 0.0009003 | 0.04705  | 0.0006723 | .                                 |
| rs1475326  | 13 | 42740514  | 0.0009004 | 0.04137  | 0.0009841 | DGKH(0)                           |
| rs61959232 | 13 | 42727117  | 0.0009004 | 0.04137  | 0.0009841 | DGKH(0)                           |
| rs9590669  | 13 | 42721410  | 0.0009004 | 0.04137  | 0.0009841 | DGKH(0)                           |
| rs9590670  | 13 | 42724205  | 0.0009004 | 0.04137  | 0.0009841 | DGKH(0)                           |
| rs9594685  | 13 | 42712089  | 0.0009004 | 0.04137  | 0.0009841 | DGKH(0)                           |
| rs59250595 | 13 | 19488780  | 0.0009008 | 0.03072  | 0.0006492 | .                                 |
| rs11995278 | 8  | 102650107 | 0.000901  | 0.1131   | 0.0008832 | GRHL2(0)                          |
| rs10443931 | 10 | 66837795  | 0.0009013 | 0.0301   | 0.0008777 | .                                 |
| rs58550930 | 3  | 172162155 | 0.0009016 | 0.09579  | 0.0009042 | GHSR(-0.795kb)                    |
| rs9880652  | 3  | 172162159 | 0.0009016 | 0.09579  | 0.0009042 | GHSR(-0.791kb)                    |
| rs62073702 | 17 | 16554210  | 0.0009018 | 0.05546  | 0.0009473 | ZNF624(0)                         |



|            |    |           |           |          |           |                                   |
|------------|----|-----------|-----------|----------|-----------|-----------------------------------|
| rs62073706 | 17 | 16563552  | 0.0009018 | 0.05546  | 0.0009473 | ZNF624(+6.394kb)                  |
| rs62073708 | 17 | 16567489  | 0.0009018 | 0.05546  | 0.0009473 | ZNF624(+10.33kb)                  |
| rs4794552  | 17 | 53087132  | 0.0009019 | 0.03751  | 0.0007172 | STXBP4(0)                         |
| rs7668778  | 4  | 47930186  | 0.0009019 | -0.03693 | 0.0008671 | NFXL1(+13.55kb) CNGA1(-7.807kb)   |
| rs62575093 | 9  | 108209438 | 0.0009029 | 0.03153  | 0.0009784 | FSD1L(-0.886kb)                   |
| rs13415618 | 2  | 49197461  | 0.000903  | -0.04776 | 0.000838  | FSHR(0)                           |
| rs10822430 | 10 | 66833255  | 0.0009032 | 0.0301   | 0.0008787 | .                                 |
| rs4626961  | 10 | 66835121  | 0.0009032 | 0.0301   | 0.0008787 | .                                 |
| rs59795853 | 1  | 68643268  | 0.0009033 | 0.05676  | 0.0009305 | GPR177(0)                         |
| rs11579075 | 1  | 242819717 | 0.0009037 | 0.04101  | 0.0009603 | .                                 |
| rs34350787 | 4  | 14494065  | 0.0009038 | 0.04077  | 0.0009617 | .                                 |
| rs13108072 | 4  | 14488732  | 0.0009041 | 0.04082  | 0.0009611 | .                                 |
| rs10895802 | 11 | 105156591 | 0.0009044 | -0.05103 | 0.0008087 | .                                 |
| rs9807975  | 2  | 102946082 | 0.0009056 | 0.02883  | 0.0007842 | IL1RL1(0)                         |
| rs12991311 | 2  | 63962907  | 0.0009057 | -0.02971 | 0.0008103 | .                                 |
| rs9633539  | 10 | 66831015  | 0.000906  | 0.0301   | 0.0008783 | .                                 |
| rs61944230 | 13 | 19487982  | 0.0009062 | 0.03077  | 0.0006603 | .                                 |
| rs10926808 | 1  | 242813898 | 0.0009072 | 0.04096  | 0.0009901 | .                                 |
| rs2012666  | 18 | 10709914  | 0.0009072 | 0.03329  | 0.0007937 | FAM38B(+12.1kb)                   |
| rs60810860 | 2  | 86724908  | 0.0009081 | 0.04011  | 0.0009803 | VPS24(-5.644kb) JMJD1A(+5.069kb)  |
| rs1558622  | 2  | 102930147 | 0.0009083 | 0.02927  | 0.0008443 | IL1RL1(0)                         |
| rs7186955  | 16 | 9886960   | 0.0009085 | -0.03219 | 0.0007827 | GRIN2A(0)                         |
| rs61742813 | 5  | 62597799  | 0.0009086 | -0.04575 | 0.0007094 | .                                 |
| rs11612913 | 12 | 126029755 | 0.0009093 | 0.0476   | 0.0009812 | TMEM132B(0)                       |
| rs6424820  | 1  | 181710617 | 0.0009096 | -0.04169 | 0.0008686 | CACNA1E(0)                        |
| rs9518648  | 13 | 102830157 | 0.0009104 | -0.03041 | 0.0009931 | FGF14(0)                          |
| rs9712463  | 20 | 54389634  | 0.0009107 | -0.03166 | 0.0008348 | .                                 |
| rs2291889  | 1  | 1335218   | 0.0009109 | -0.1098  | 0.000871  | MRPL20(-2.057kb) CCNL2(+0.528kb)  |
| rs1485395  | 12 | 53995077  | 0.0009121 | -0.03866 | 0.0006188 | ATF7(0)                           |
| rs8050250  | 16 | 64661689  | 0.0009124 | 0.03     | 0.0007355 | .                                 |
| rs10841143 | 12 | 19218576  | 0.0009128 | 0.1347   | 0.0009055 | .                                 |
| rs9261528  | 6  | 30119429  | 0.0009141 | -0.03446 | 0.0007251 | TRIM15(-11.55kb) TRIM40(+2.917kb) |
| rs4832496  | 2  | 17752538  | 0.0009142 | -0.03315 | 0.0006422 | VSNL1(0)                          |
| rs2119208  | 4  | 47947188  | 0.0009149 | -0.03678 | 0.0008849 | CNGA1(0)                          |
| rs11800362 | 1  | 79994011  | 0.000916  | 0.03814  | 0.0007676 | .                                 |
| rs243776   | 6  | 54322106  | 0.000916  | -0.06085 | 0.0007878 | .                                 |
| rs4555602  | 4  | 47921824  | 0.0009162 | -0.0369  | 0.0009025 | NFXL1(+5.191kb) CNGA1(-16.17kb)   |
| rs9594716  | 13 | 42806935  | 0.0009163 | 0.04378  | 0.00099   | DGKH(+3.047kb)                    |
| rs10822431 | 10 | 66833436  | 0.0009168 | -0.0313  | 0.0008835 | .                                 |
| rs11240724 | 1  | 204316082 | 0.0009168 | 0.0301   | 0.0006471 | PLEKHA6(0)                        |
| rs16958711 | 16 | 69294770  | 0.0009169 | 0.05579  | 0.0009018 | SNTB2(0)                          |
| rs12598253 | 16 | 53730602  | 0.000917  | -0.0673  | 0.0008078 | RPGRIP1L(0) FTO(-7.272kb)         |
| rs1416838  | 9  | 110689309 | 0.0009171 | 0.03918  | 0.0006417 | .                                 |
| rs6734498  | 2  | 168712041 | 0.0009173 | -0.06811 | 0.000782  | B3GALT1(0)                        |
| rs7181569  | 15 | 101049260 | 0.0009174 | -0.1179  | 0.0008932 | LASS3(0)                          |
| rs1558268  | 17 | 14562229  | 0.0009189 | -0.0321  | 0.000969  | .                                 |
| rs12525515 | 6  | 153264264 | 0.000919  | -0.03313 | 0.0008379 | .                                 |

|            |    |           |           |          |           |                                   |
|------------|----|-----------|-----------|----------|-----------|-----------------------------------|
| rs12530377 | 6  | 153264053 | 0.000919  | -0.03313 | 0.0008379 | .                                 |
| rs1030891  | 2  | 240539765 | 0.0009192 | -0.04406 | 0.0009447 | .                                 |
| rs12699335 | 7  | 12277020  | 0.0009192 | 0.03619  | 0.0008404 | TMEM106B(+0.137kb)                |
| rs17408612 | 7  | 101630997 | 0.0009192 | -0.03273 | 0.000887  | CUX1(0)                           |
| rs10245949 | 7  | 47877939  | 0.0009216 | 0.03301  | 0.0007722 | PKD1L1(0) FLJ21075(+18.5kb)       |
| rs11871369 | 17 | 16542216  | 0.0009216 | -0.03022 | 0.0009297 | ZNF624(0)                         |
| rs6533418  | 4  | 110152998 | 0.0009217 | -0.03059 | 0.0008454 | COL25A1(0)                        |
| rs488625   | 4  | 130137778 | 0.0009228 | -0.03649 | 0.0009759 | .                                 |
| rs11863363 | 16 | 64692757  | 0.0009239 | 0.04953  | 0.0007225 | .                                 |
| rs7136142  | 12 | 126029664 | 0.0009239 | 0.03039  | 0.0009832 | TMEM132B(0)                       |
| rs56705125 | 4  | 136150239 | 0.0009244 | 0.03246  | 0.0009479 | .                                 |
| rs17193599 | 12 | 91743477  | 0.0009249 | 0.0727   | 0.0008806 | .                                 |
| rs36098010 | 1  | 97442394  | 0.0009249 | -0.03218 | 0.0005892 | .                                 |
| rs12825669 | 12 | 106288445 | 0.0009252 | 0.03082  | 0.0006429 | .                                 |
| rs6705901  | 2  | 26253320  | 0.0009256 | -0.1187  | 0.0009439 | RAB10(-3.653kb)                   |
| rs1372749  | 13 | 88705053  | 0.000926  | -0.03983 | 0.0006707 | .                                 |
| rs1372750  | 13 | 88705014  | 0.000926  | -0.03983 | 0.0006707 | .                                 |
| rs10996180 | 10 | 66829743  | 0.0009267 | 0.03013  | 0.0008878 | .                                 |
| rs6473267  | 8  | 51562835  | 0.0009272 | 0.03053  | 0.0007233 | SNTG1(0)                          |
| rs9507545  | 13 | 26249647  | 0.0009272 | -0.04333 | 0.0006905 | ATP8A2(0)                         |
| rs34237696 | 5  | 123864536 | 0.0009277 | -0.06519 | 0.0008507 | .                                 |
| rs2189527  | 16 | 64714456  | 0.0009279 | 0.03041  | 0.0007169 | .                                 |
| rs376379   | 4  | 130136119 | 0.0009289 | -0.03254 | 0.0009029 | .                                 |
| rs10760422 | 9  | 128964687 | 0.0009294 | 0.03163  | 0.0008373 | .                                 |
| rs56117050 | 16 | 64696174  | 0.0009295 | 0.0304   | 0.0007205 | .                                 |
| rs9922210  | 16 | 64709292  | 0.0009295 | 0.0304   | 0.0007205 | .                                 |
| rs12465137 | 2  | 61808768  | 0.0009299 | 0.07149  | 0.0005895 | .                                 |
| rs10791749 | 11 | 105114722 | 0.0009302 | -0.05087 | 0.0008298 | .                                 |
| rs6567133  | 18 | 57586051  | 0.0009306 | 0.02908  | 0.0006732 | PMAIP1(+14.51kb)                  |
| rs9404485  | 6  | 104336182 | 0.0009311 | 0.04547  | 0.0007722 | .                                 |
| rs10444557 | 12 | 54055319  | 0.0009313 | -0.03935 | 0.000651  | ATP5G2(-3.624kb)                  |
| rs7902544  | 10 | 66853683  | 0.0009316 | 0.03045  | 0.0008766 | .                                 |
| rs1968170  | 2  | 102933802 | 0.0009319 | 0.02882  | 0.0008084 | IL1RL1(0)                         |
| rs4884026  | 13 | 76481859  | 0.0009324 | 0.06675  | 0.0009707 | .                                 |
| rs6692149  | 1  | 80027210  | 0.0009326 | 0.03497  | 0.0008487 | .                                 |
| rs444348   | 2  | 17641617  | 0.0009327 | -0.03327 | 0.0006624 | .                                 |
| rs9261461  | 6  | 30101950  | 0.0009341 | -0.03504 | 0.0007766 | TRIM40(-2.559kb) TRIM10(-17.77kb) |
| rs12110507 | 6  | 77299933  | 0.0009342 | 0.04238  | 0.0009406 | .                                 |
| rs1882763  | 7  | 101631348 | 0.0009343 | 0.03617  | 0.0008974 | CUX1(0)                           |
| rs12813667 | 12 | 77536250  | 0.0009347 | 0.04949  | 0.0005097 | .                                 |
| rs17867518 | 4  | 118540464 | 0.0009351 | -0.09163 | 0.0008535 | .                                 |
| rs1537108  | 21 | 40359144  | 0.0009357 | 0.03075  | 0.0009499 | .                                 |
| rs834504   | 2  | 17725275  | 0.0009361 | -0.03291 | 0.0006672 | VSNL1(0)                          |
| rs3852552  | 12 | 54009395  | 0.0009375 | -0.03894 | 0.0006491 | ATF7(0)                           |
| rs222623   | 14 | 24124605  | 0.0009376 | 0.03152  | 0.0007903 | DHRS2(+9.757kb)                   |
| rs7197278  | 16 | 9907064   | 0.0009377 | -0.0336  | 0.0008896 | GRIN2A(0)                         |
| rs4245480  | 6  | 104343935 | 0.0009394 | 0.04332  | 0.0007556 | .                                 |

|            |    |           |           |          |           |                                   |
|------------|----|-----------|-----------|----------|-----------|-----------------------------------|
| rs6797237  | 3  | 142344689 | 0.0009407 | 0.0407   | 0.0009946 | PLS1(0)                           |
| rs1554522  | 17 | 25913172  | 0.0009412 | 0.02963  | 0.0006845 | KSR1(0)                           |
| rs945097   | 7  | 80216951  | 0.0009416 | -0.1275  | 0.0008954 | CD36(-14.55kb)                    |
| rs34864644 | 9  | 115058097 | 0.0009417 | 0.03184  | 0.000868  | ROD1(0)                           |
| rs7865424  | 9  | 115058624 | 0.0009417 | 0.03184  | 0.000868  | ROD1(0)                           |
| rs2245690  | 15 | 101047881 | 0.0009432 | -0.1177  | 0.0009201 | LASS3(0)                          |
| rs2411826  | 15 | 101047699 | 0.0009432 | -0.1177  | 0.0009201 | LASS3(0)                          |
| rs2411828  | 15 | 101050527 | 0.0009432 | -0.1177  | 0.0009201 | LASS3(0)                          |
| rs2654619  | 15 | 101046953 | 0.0009432 | -0.1177  | 0.0009201 | LASS3(0)                          |
| rs7175791  | 15 | 101048997 | 0.0009432 | -0.1177  | 0.0009201 | LASS3(0)                          |
| rs7176024  | 15 | 101049137 | 0.0009432 | -0.1177  | 0.0009201 | LASS3(0)                          |
| rs4293014  | 10 | 66824497  | 0.0009434 | 0.03019  | 0.0009052 | .                                 |
| rs4796901  | 18 | 10704619  | 0.0009435 | 0.0351   | 0.000832  | FAM38B(+6.805kb)                  |
| rs4797464  | 18 | 10704222  | 0.0009435 | 0.0351   | 0.000832  | FAM38B(+6.408kb)                  |
| rs417309   | 22 | 20098544  | 0.0009441 | -0.03124 | 0.0008647 | RANBP1(-6.479kb) HTF9C(-0.853kb)  |
| rs4951365  | 1  | 204317155 | 0.0009441 | -0.05415 | 0.0006684 | PLEKHA6(0)                        |
| rs62072785 | 17 | 16508107  | 0.0009449 | 0.05719  | 0.0009792 | ZNF624(-15.94kb)                  |
| rs10142589 | 14 | 22186087  | 0.0009455 | -0.03248 | 0.0009178 | .                                 |
| rs11676075 | 2  | 102941215 | 0.0009458 | 0.02866  | 0.0008286 | IL1RL1(0)                         |
| rs12466380 | 2  | 102948939 | 0.0009458 | 0.02866  | 0.0008286 | IL1RL1(0)                         |
| rs1420088  | 2  | 102939434 | 0.0009458 | 0.02866  | 0.0008286 | IL1RL1(0)                         |
| rs1420102  | 2  | 102948819 | 0.0009458 | 0.02866  | 0.0008286 | IL1RL1(0)                         |
| rs11935469 | 4  | 90690832  | 0.0009463 | 0.05599  | 0.0009526 | SNCA(0)                           |
| rs7116979  | 11 | 4937101   | 0.0009463 | 0.05599  | 0.0009424 | OR51G1(-7.502kb) OR51G2(+0.208kb) |
| rs9633907  | 11 | 4937943   | 0.0009463 | 0.06414  | 0.0009424 | OR51G1(-6.66kb) OR51G2(+1.05kb)   |
| rs1968542  | 4  | 47956139  | 0.000948  | -0.03695 | 0.0009182 | CNGA1(+1.413kb)                   |
| rs62574187 | 9  | 119457995 | 0.000949  | 0.04324  | 0.000816  | TRIM32(0) ASTN2(0)                |
| rs11185389 | 1  | 104747846 | 0.0009508 | -0.02877 | 0.0008446 | .                                 |
| rs12521251 | 5  | 143149900 | 0.0009508 | 0.05376  | 0.0009107 | .                                 |
| rs7904334  | 10 | 86011929  | 0.0009508 | 0.0335   | 0.0009986 | RGR(0) LRIT1(+10.71kb)            |
| rs2601083  | 2  | 169278187 | 0.0009509 | -0.06659 | 0.0009079 | .                                 |
| rs10025915 | 4  | 90695508  | 0.0009518 | 0.06409  | 0.0009606 | SNCA(0)                           |
| rs11931062 | 4  | 90690704  | 0.0009518 | 0.06409  | 0.0009606 | SNCA(0)                           |
| rs3899608  | 4  | 90690931  | 0.0009518 | 0.06409  | 0.0009606 | SNCA(0)                           |
| rs7690873  | 4  | 90687862  | 0.0009518 | 0.06409  | 0.0009606 | SNCA(0)                           |
| rs60203546 | 9  | 119473074 | 0.0009521 | 0.04246  | 0.0008152 | TRIM32(+9.495kb) ASTN2(0)         |
| rs9893306  | 17 | 53054749  | 0.0009523 | -0.03294 | 0.0009258 | TOM1L1(+15.42kb) STXBP4(0) COX11  |
| rs7071002  | 10 | 134145835 | 0.0009525 | 0.03029  | 0.0008698 | LRRC27(0)                         |
| rs62005649 | 15 | 67045096  | 0.0009526 | 0.08052  | 0.0009623 | SMAD6(0)                          |
| rs1715126  | 2  | 17681685  | 0.0009544 | -0.03286 | 0.0006767 | RAD51AP2(-10.3kb)                 |
| rs834506   | 2  | 17676091  | 0.0009544 | -0.03286 | 0.0006767 | RAD51AP2(-15.89kb)                |
| rs2352466  | 4  | 47948264  | 0.0009554 | -0.03676 | 0.0009339 | CNGA1(0)                          |
| rs7690522  | 4  | 47950900  | 0.0009554 | -0.03661 | 0.0009304 | CNGA1(0)                          |
| rs2365344  | 12 | 54009977  | 0.0009556 | -0.03882 | 0.0006684 | ATF7(0)                           |
| rs13427356 | 2  | 69114631  | 0.0009562 | -0.03147 | 0.000823  | BMP10(+15.98kb)                   |
| rs7132466  | 12 | 53996823  | 0.0009577 | -0.03849 | 0.0006534 | ATF7(0)                           |
| rs13300924 | 9  | 99152660  | 0.0009581 | 0.07491  | 0.0005947 | ZNF367(0) SLC35D2(+6.723kb)       |

|            |    |           |           |          |           |                 |
|------------|----|-----------|-----------|----------|-----------|-----------------|
| rs11790153 | 9  | 128983093 | 0.0009584 | -0.03779 | 0.0008243 | .               |
| rs2882100  | 6  | 153265387 | 0.0009592 | -0.03293 | 0.0008846 | .               |
| rs6823611  | 4  | 14557065  | 0.0009593 | 0.03601  | 0.0008289 | .               |
| rs11638324 | 15 | 91172033  | 0.0009599 | -0.0372  | 0.000868  | CRTC3(0)        |
| rs2494269  | 1  | 197365149 | 0.0009601 | 0.03587  | 0.0009347 | CRB1(0)         |
| rs2759659  | 1  | 197368840 | 0.0009601 | 0.03587  | 0.0009347 | CRB1(0)         |
| rs10443930 | 10 | 66837778  | 0.0009602 | 0.03018  | 0.000928  | .               |
| rs11211203 | 1  | 46315592  | 0.000961  | -0.02993 | 0.0008128 | MAST2(0)        |
| rs11126538 | 2  | 76745159  | 0.0009613 | 0.02899  | 0.0006643 | .               |
| rs12589872 | 14 | 68818292  | 0.0009619 | -0.03873 | 0.0006975 | RAD51L1(0)      |
| rs4259443  | 8  | 139946839 | 0.000962  | 0.05484  | 0.0009375 | .               |
| rs11768631 | 7  | 77865287  | 0.0009623 | 0.03052  | 0.0009658 | MAGI2(0)        |
| rs519968   | 5  | 152845246 | 0.0009624 | 0.08684  | 0.0009067 | .               |
| rs2057748  | 7  | 8559476   | 0.0009628 | 0.0339   | 0.0008492 | NXPH1(0)        |
| rs2821101  | 1  | 197368231 | 0.0009635 | 0.03583  | 0.0009473 | CRB1(0)         |
| rs62298270 | 4  | 47914624  | 0.0009652 | -0.0366  | 0.0009624 | NFXL1(0)        |
| rs12700039 | 7  | 19397836  | 0.0009653 | -0.1096  | 0.00087   | .               |
| rs2422125  | 11 | 36069176  | 0.0009654 | 0.1376   | 0.0009804 | LDLRAD3(0)      |
| rs2422126  | 11 | 36069192  | 0.0009654 | 0.1376   | 0.0009804 | LDLRAD3(0)      |
| rs2422128  | 11 | 36069222  | 0.0009654 | 0.1376   | 0.0009804 | LDLRAD3(0)      |
| rs4619033  | 1  | 204269242 | 0.0009667 | -0.03235 | 0.0007295 | PLEKHA6(0)      |
| rs4672345  | 2  | 53555139  | 0.0009669 | -0.03011 | 0.0007225 | .               |
| rs11170614 | 12 | 54017647  | 0.0009671 | -0.04272 | 0.0006744 | ATF7(0)         |
| rs17204778 | 16 | 9906856   | 0.0009673 | -0.03446 | 0.0009903 | GRIN2A(0)       |
| rs759846   | 2  | 53553569  | 0.0009681 | 0.02989  | 0.000731  | .               |
| rs8053218  | 16 | 64657208  | 0.0009681 | -0.03019 | 0.0007646 | .               |
| rs17085762 | 6  | 155194880 | 0.000971  | -0.03776 | 0.0006648 | .               |
| rs1979468  | 9  | 29646793  | 0.0009723 | 0.03328  | 0.0007041 | .               |
| rs10939559 | 4  | 14557687  | 0.000973  | 0.03596  | 0.0008397 | .               |
| rs593991   | 3  | 124165990 | 0.0009743 | -0.02981 | 0.0008663 | KALRN(0)        |
| rs13290716 | 9  | 99235654  | 0.0009747 | 0.07585  | 0.0005833 | HABP4(0)        |
| rs34338047 | 9  | 99240838  | 0.0009747 | 0.07585  | 0.0005833 | HABP4(0)        |
| rs34551341 | 9  | 99226937  | 0.0009747 | 0.07585  | 0.0005833 | HABP4(0)        |
| rs34653867 | 9  | 99240872  | 0.0009747 | 0.07585  | 0.0005833 | HABP4(0)        |
| rs34881918 | 9  | 99223915  | 0.0009747 | 0.07585  | 0.0005833 | HABP4(0)        |
| rs16949291 | 13 | 94479976  | 0.0009752 | -0.08781 | 0.0006219 | GPC6(0)         |
| rs4628128  | 6  | 159453605 | 0.0009752 | -0.09916 | 0.0009078 | TAGAP(-2.421kb) |
| rs1365694  | 13 | 88701168  | 0.0009758 | -0.03963 | 0.0007161 | .               |
| rs9519244  | 13 | 88701732  | 0.0009758 | -0.03963 | 0.0007161 | .               |
| rs4722402  | 7  | 24939660  | 0.0009761 | -0.05259 | 0.0008075 | OSBPL3(0)       |
| rs3808880  | 9  | 115061448 | 0.0009788 | 0.03186  | 0.0008982 | ROD1(0)         |
| rs6498954  | 16 | 64667564  | 0.00098   | 0.03004  | 0.000754  | .               |
| rs10517828 | 4  | 63402824  | 0.0009802 | -0.04327 | 0.0007934 | .               |
| rs57206820 | 4  | 63407450  | 0.0009802 | -0.04327 | 0.0007934 | .               |
| rs12996772 | 2  | 102947201 | 0.0009807 | 0.02861  | 0.0008531 | IL1RL1(0)       |
| rs61553648 | 1  | 241418981 | 0.0009812 | -0.04339 | 0.0009818 | RG57(0)         |
| rs62330906 | 5  | 2615306   | 0.0009814 | 0.1428   | 0.0008971 | .               |

|            |    |           |           |          |           |                                  |
|------------|----|-----------|-----------|----------|-----------|----------------------------------|
| rs7774820  | 6  | 123955723 | 0.000982  | -0.07091 | 0.0008255 | TRDN(0)                          |
| rs6863958  | 5  | 143165024 | 0.0009848 | 0.03372  | 0.0009214 | .                                |
| rs839539   | 2  | 212811801 | 0.0009851 | 0.04198  | 0.0008065 | ERBB4(0)                         |
| rs4584453  | 1  | 204269383 | 0.0009859 | -0.03237 | 0.0007387 | PLEKHA6(0)                       |
| rs12712136 | 2  | 102936366 | 0.000986  | 0.02869  | 0.0008568 | IL1RL1(0)                        |
| rs10110936 | 8  | 51558075  | 0.0009876 | -0.04236 | 0.0007987 | SNTG1(0)                         |
| rs448893   | 2  | 17685488  | 0.000988  | -0.03275 | 0.0007037 | RAD51AP2(-6.497kb)               |
| rs455326   | 5  | 34648725  | 0.0009885 | 0.02968  | 0.0009227 | RAI14(-7.792kb)                  |
| rs7606442  | 2  | 3283700   | 0.0009885 | -0.03059 | 0.000795  | TSSC1(0)                         |
| rs1021263  | 4  | 30743575  | 0.0009886 | 0.04061  | 0.0009864 | PCDH7(0)                         |
| rs1032174  | 4  | 30743398  | 0.0009886 | 0.04061  | 0.0009864 | PCDH7(0)                         |
| rs2275589  | 13 | 76457588  | 0.0009894 | 0.06357  | 0.0009961 | .                                |
| rs1012881  | 6  | 153266734 | 0.0009899 | -0.03291 | 0.0009099 | .                                |
| rs1012882  | 6  | 153266844 | 0.0009899 | -0.03291 | 0.0009099 | .                                |
| rs2144359  | 6  | 153268143 | 0.0009899 | -0.03291 | 0.0009099 | .                                |
| rs10405364 | 19 | 18972008  | 0.0009912 | 0.05533  | 0.0009409 | UPF1(0) LASS1(-7.352kb) GDF1(-7. |
| rs7969195  | 12 | 53942789  | 0.0009913 | -0.04111 | 0.0006783 | ATF7(0)                          |
| rs10002498 | 4  | 47928585  | 0.0009923 | -0.03308 | 0.0009716 | NFXL1(+11.95kb) CNGA1(-9.408kb)  |
| rs11649466 | 16 | 9908808   | 0.0009923 | -0.03653 | 0.0009449 | GRIN2A(0)                        |
| rs11946535 | 4  | 47925881  | 0.0009923 | -0.03653 | 0.0009716 | NFXL1(+9.248kb) CNGA1(-12.11kb)  |
| rs12506026 | 4  | 47928161  | 0.0009923 | -0.03653 | 0.0009716 | NFXL1(+11.53kb) CNGA1(-9.832kb)  |
| rs2352456  | 4  | 47926653  | 0.0009923 | -0.03653 | 0.0009716 | NFXL1(+10.02kb) CNGA1(-11.34kb)  |
| rs3811761  | 4  | 47929234  | 0.0009923 | -0.03653 | 0.0009716 | NFXL1(+12.6kb) CNGA1(-8.759kb)   |
| rs4695312  | 4  | 47930341  | 0.0009923 | -0.03653 | 0.0009716 | NFXL1(+13.71kb) CNGA1(-7.652kb)  |
| rs6447596  | 4  | 47918302  | 0.0009923 | -0.03653 | 0.0009716 | NFXL1(+1.669kb) CNGA1(-19.69kb)  |
| rs6815975  | 4  | 47917857  | 0.0009923 | -0.03653 | 0.0009716 | NFXL1(+1.224kb)                  |
| rs7197724  | 16 | 64711881  | 0.0009926 | 0.03031  | 0.0007601 | .                                |
| rs1333808  | 13 | 88729826  | 0.0009927 | -0.0391  | 0.0007254 | .                                |
| rs375464   | 5  | 122480914 | 0.0009935 | 0.03026  | 0.0008412 | .                                |
| rs4949110  | 16 | 64691689  | 0.0009935 | 0.02961  | 0.0007692 | .                                |
| rs1333811  | 13 | 88716081  | 0.0009946 | -0.0396  | 0.0007144 | .                                |
| rs7323540  | 13 | 88715468  | 0.0009946 | -0.0396  | 0.0007144 | .                                |
| rs6498955  | 16 | 64672262  | 0.0009948 | 0.02997  | 0.0007825 | .                                |
| rs2110660  | 2  | 102918601 | 0.0009951 | 0.02876  | 0.0008457 | IL1RL1(-9.36kb)                  |
| rs2648908  | 8  | 129127594 | 0.0009958 | 0.1052   | 0.0009115 | .                                |
| rs4480825  | 16 | 64677975  | 0.0009961 | 0.03012  | 0.0008019 | .                                |
| rs12155465 | 7  | 81501546  | 0.0009962 | -0.03082 | 0.0009699 | .                                |
| rs10214211 | 5  | 159400511 | 0.001     | 0.06645  | 0.000616  | ADRA1B(+0.494kb)                 |
