# Supplementary material
Source: PubMed Central journal article supplement (PMC4266741)
Supplement: ejhg201456x4.pdf [file ejhg201456x4.pdf]

**PC1****Study by Girotto et al. (2011)**

| <i>SNP</i> | <i>Chr</i> | <i>Position</i> | <i>Original p-value</i> | <i>Gene region</i> | <i>Current P-value</i> |
|------------|------------|-----------------|-------------------------|--------------------|------------------------|
| rs2687481  | 7          | 1.26E+08        | 3.22E-07                | GRM8               | 0.2958                 |
| rs2521030  | 7          | 1.26E+08        | 4.56E-07                | GRM8               | 0.3988                 |
| rs2687479  | 7          | 1.26E+08        | 4.87E-07                | GRM8               | 0.7445                 |
| rs1673365  | 7          | 1.26E+08        | 1.45E-06                | GRM8               | 0.2575                 |
| rs1673369  | 7          | 1.26E+08        | 1.46E-06                | GRM8               | 0.3544                 |
| rs1719089  | 7          | 1.26E+08        | 1.50E-06                | GRM8               | 0.5487                 |
| rs1719090  | 7          | 1.26E+08        | 1.57E-06                | GRM8               | 0.421                  |
| rs1719091  | 7          | 1.26E+08        | 1.58E-06                | GRM8               | 0.5186                 |
| rs1719093  | 7          | 1.26E+08        | 1.60E-06                | GRM8               | 0.381                  |
| rs1673373  | 7          | 1.26E+08        | 1.87E-06                | GRM8               | 0.4794                 |
| rs6544889  | 2          | 46430803        | 2.18E-06                | EPAS1*             | 0.004957               |
| rs6544887  | 2          | 46430716        | 2.18E-06                | EPAS1*             | 0.004697               |
| rs6544888  | 2          | 46430769        | 2.19E-06                | EPAS1*             | 0.004968               |
| rs1562452  | 2          | 46433948        | 2.61E-06                | EPAS1*             | 0.005958               |
| rs11671149 | 19         | 58862280        | 2.95E-06                | DPRX               | 0.6548                 |
| rs585747   | 11         | 79377793        | 3.08E-06                |                    | 0.4773                 |
| rs3765620  | 11         | 1.02E+08        | 3.35E-06                | MMP27; MMP8        | 0.7806                 |
| rs1036987  | 17         | 72403766        | 3.45E-06                | MGAT5B             | 0.3409                 |
| rs6756667  | 2          | 46432913        | 3.73E-06                | EPAS1*             | 0.001629               |
| rs1562453  | 2          | 46433978        | 3.76E-06                | EPAS1*             | 0.00886                |
| rs4953356  | 2          | 46432428        | 3.79E-06                | EPAS1*             | 0.005734               |
| rs17705835 | 15         | 91463287        | 3.82E-06                | RGMA; CHD2         | 0.9646                 |
| rs6743991  | 2          | 46436739        | 4.27E-06                | EPAS1*             | 0.007605               |
| rs6735812  | 2          | 46434578        | 4.47E-06                | EPAS1*             | 0.008356               |
| rs4953358  | 2          | 46434957        | 4.56E-06                | EPAS1*             | 0.006806               |
| rs4953359  | 2          | 46435147        | 4.63E-06                | EPAS1              | 0.1182                 |
| rs10848114 | 12         | 1.3E+08         | 4.75E-06                | RIMBP2             | 0.09718                |
| rs6585804  | 10         | 1.24E+08        | 5.33E-06                | TACC2              | 0.5053                 |
| rs17687720 | 13         | 1.01E+08        | 5.76E-06                | FGF14              | 0.8108                 |
| rs7987221  | 13         | 1.01E+08        | 5.77E-06                | FGF14              | 0.4818                 |
| rs17687714 | 13         | 1.01E+08        | 5.78E-06                | FGF14              | 0.7901                 |
| rs17687732 | 13         | 1.01E+08        | 5.83E-06                | FGF14              | 0.8012                 |
| rs17631289 | 13         | 1.01E+08        | 6.35E-06                | FGF14              | 0.9502                 |
| rs12430805 | 13         | 1.01E+08        | 6.50E-06                | FGF14              | 0.8014                 |
| rs1073341  | 7          | 1.26E+08        | 6.52E-06                | GRM8               | 0.4806                 |
| rs12430821 | 13         | 1.01E+08        | 6.66E-06                | FGF14              | 0.7234                 |
| rs6742663  | 2          | 20258641        | 6.68E-06                | SDC1               | 0.5552                 |
| rs4772428  | 13         | 1.01E+08        | 6.74E-06                | FGF14              | 0.9378                 |
| rs12427431 | 13         | 1.01E+08        | 6.88E-06                | FGF14              | 0.8134                 |
| rs17631205 | 13         | 1.01E+08        | 6.89E-06                | FGF14              | 0.9668                 |
| rs12856393 | 13         | 1.01E+08        | 7.02E-06                | FGF14              | 0.9091                 |
| rs12427457 | 13         | 1.01E+08        | 7.07E-06                | FGF14              | 0.9356                 |
| rs6707241  | 2          | 46438356        | 7.32E-06                | EPAS1*             | 0.006459               |

|            |    |          |          |        |          |
|------------|----|----------|----------|--------|----------|
| rs6740096  | 2  | 46439392 | 7.34E-06 | EPAS1* | 0.002612 |
| rs4350703  | 2  | 20263750 | 7.35E-06 | SDC1   | 0.9915   |
| rs6756290  | 2  | 20259092 | 7.98E-06 | SDC1   | 0.6863   |
| rs10191091 | 2  | 46426714 | 8.15E-06 | EPAS1* | 0.005896 |
| rs2348475  | 2  | 20260595 | 8.28E-06 | SDC1   | 0.8202   |
| rs11895809 | 2  | 20262535 | 8.30E-06 | SDC1   | 0.8166   |
| rs978091   | 14 | 42414308 | 8.86E-06 |        | 0.3215   |
| rs7182802  | 15 | 24929952 | 9.94E-06 | GABRG3 | 0.733    |

\* in the EPAS1 gene, the effect allele differs between the two studies.

The low p-value does not represent a replication.

#### Study by Van Laer et al. (2010)

| <i>SNP</i> | <i>Chr</i> | <i>Position</i> | <i>Original p-value</i> | <i>Gene region</i> | <i>Current P-value</i> |
|------------|------------|-----------------|-------------------------|--------------------|------------------------|
| rs1413042  | 13         | 38600755        | 2.91E-05 /              |                    | 0.4942                 |
| rs1016111  | 6          | 14121677        | 5.86E-05 /              |                    | 0.9049                 |
| rs1826882  | 15         | 19989036        | 9.41E-05                | LOC642131          | NA                     |

#### Study by Friedman et al. (2009)

| <i>SNP</i> | <i>Chr</i> | <i>Position</i> | <i>Original p-value</i> | <i>Gene region</i> | <i>Current P-value</i> |
|------------|------------|-----------------|-------------------------|--------------------|------------------------|
| rs161927   | 3          | 7813242         | 1.49E-04                | GRM7               | 0.3368                 |
| rs11928865 | 3          | 7155702         | 8.00E-04                | GRM7               | 0.4304                 |

**PC2****Study by Girotto et al. (2011)**

| <i>SNP</i> | <i>Chr</i> | <i>Position</i> | <i>Original p-value</i> | <i>Gene region</i> | <i>Current P-value</i> |
|------------|------------|-----------------|-------------------------|--------------------|------------------------|
| rs7212433  | 17         | 27107800        | 2.07E-07                | UTP6               | 0.8791                 |
| rs11219981 | 11         | 1.25E+08        | 2.86E-07                | PKNOX2             | 0.6469                 |
| rs10790729 | 11         | 1.25E+08        | 5.96E-07                | PKNOX2             | 0.3055                 |
| rs6669265  | 1          | 27233806        | 5.97E-07                | GPATCH3            | 0.02178                |
| rs2276957  | 4          | 1.22E+08        | 4.85E-06                | GPR103             | 0.2766                 |
| rs1952587  | 14         | 56230970        | 4.98E-06                | C14orf101; OTX2    | 0.01771                |
| rs12499677 | 4          | 1.22E+08        | 5.05E-06                | GPR103             | 0.1466                 |
| rs10857080 | 4          | 1.22E+08        | 5.09E-06                | GPR103             | 0.3157                 |
| rs3783041  | 13         | 59486892        | 5.14E-06                | DIAPH3             | 0.3607                 |
| rs3783040  | 13         | 59486531        | 5.18E-06                | DIAPH3             | 0.7307                 |
| rs17864603 | 2          | 51842904        | 5.27E-06                |                    | 0.06545                |
| rs11843015 | 13         | 59485201        | 5.28E-06                | DIAPH3             | 0.2267                 |
| rs11219971 | 11         | 1.25E+08        | 5.35E-06                | PKNOX2             | 0.1527                 |
| rs11841515 | 13         | 59476294        | 5.83E-06                | DIAPH3             | NA                     |
| rs13144655 | 4          | 1.22E+08        | 6.57E-06                | GPR103             | 0.3108                 |
| rs928108   | 14         | 56240227        | 7.45E-06                | C14orf101; OTX2    | 0.06091                |
| rs11842701 | 13         | 59329690        | 7.77E-06                | DIAPH3             | 0.1799                 |
| rs4240259  | 4          | 1.22E+08        | 7.89E-06                | GPR103             | 0.4584                 |
| rs11844009 | 13         | 59336501        | 8.74E-06                | DIAPH3             | 0.2247                 |
| rs10790728 | 11         | 1.25E+08        | 8.91E-06                | PKNOX2             | 0.1876                 |
| rs17292288 | 9          | 1.28E+08        | 8.95E-06                | FAM125B            | 0.6363                 |
| rs10893349 | 11         | 1.25E+08        | 8.99E-06                | PKNOX2             | 0.2537                 |
| rs913741   | 14         | 56241026        | 9.28E-06                | C14orf101; OTX2    | 0.05184                |
| rs17091976 | 14         | 56239864        | 9.76E-06                | C14orf101; OTX2    | 0.04863                |

**Study by Van Laer et al. (2010)**

| <i>SNP</i> | <i>Chr</i> | <i>Position</i> | <i>Original p-value</i> | <i>Gene region</i> | <i>Current P-value</i> |
|------------|------------|-----------------|-------------------------|--------------------|------------------------|
| rs10499138 | 6          | 1.29E+08        | 1.70E-06                | PTPRK              | NA                     |
| rs10491923 | 9          | 76139000        | 2.79E-05                | /                  | NA                     |
| rs10499136 | 6          | 1.28E+08        | 3.58E-05                | PTPRK              | NA                     |
| rs9308868  | 2          | 1.04E+08        | 6.45E-05                | /                  | 0.8668                 |
| rs1555167  | 6          | 62465026        | 9.62E-05                | KHDRBS2            | 0.2982                 |
| rs9294311  | 6          | 62470112        | 9.62E-05                | KHDRBS2            | 0.2875                 |
| rs9294314  | 6          | 62470480        | 9.62E-05                | KHDRBS2            | 0.2875                 |

**PC3****Study by Girotto et al. (2011)**

| <i>SNP</i> | <i>Chr</i> | <i>Position</i> | <i>Original p-value</i> | <i>Gene region</i> | <i>Current P-value</i> |
|------------|------------|-----------------|-------------------------|--------------------|------------------------|
| rs712932   | 1          | 99424088        | 2.32E-07                | PAP2D; LPPR4       | 0.7273                 |
| rs712934   | 1          | 99421564        | 2.33E-07                | PAP2D; LPPR4       | 0.613                  |
| rs712931   | 1          | 99426756        | 2.38E-07                | PAP2D; LPPR4       | 0.7225                 |
| rs819786   | 1          | 99427115        | 2.39E-07                | PAP2D; LPPR4       | 0.6227                 |
| rs819785   | 1          | 99428208        | 2.41E-07                | PAP2D; LPPR4       | 0.6495                 |
| rs712936   | 1          | 99419627        | 2.84E-07                | PAP2D; LPPR4       | 0.613                  |
| rs712937   | 1          | 99418034        | 3.15E-07                | PAP2D; LPPR4       | 0.6071                 |
| rs664835   | 1          | 99436556        | 4.74E-07                | PAP2D; LPPR4       | 0.5661                 |
| rs819778   | 1          | 99437774        | 5.00E-07                | PAP2D; LPPR4       | 0.6327                 |
| rs645441   | 1          | 99442645        | 5.65E-07                | PAP2D; LPPR4       | 0.5035                 |
| rs687101   | 1          | 99410160        | 6.25E-07                | PAP2D; LPPR4       | 0.2847                 |
| rs638723   | 1          | 99414257        | 6.59E-07                | PAP2D; LPPR4       | 0.493                  |
| rs685267   | 1          | 99443937        | 8.37E-07                | PAP2D; LPPR4       | 0.6825                 |
| rs668206   | 1          | 99416551        | 9.64E-07                | PAP2D; LPPR4       | 0.6208                 |
| rs11485142 | 1          | 2.17E+08        | 1.41E-06                | TGFB2              | 0.7042                 |
| rs604876   | 1          | 99413608        | 1.91E-06                | PAP2D; LPPR4       | 0.5771                 |
| rs305256   | 8          | 1.38E+08        | 2.37E-06                |                    | 0.4354                 |
| rs3911410  | 1          | 99432733        | 2.44E-06                | PAP2D; LPPR4       | 0.3174                 |
| rs2581561  | 8          | 1.38E+08        | 3.48E-06                |                    | 0.4417                 |
| rs621215   | 1          | 99392012        | 3.73E-06                | PAP2D; LPPR4       | 0.4572                 |
| rs305255   | 8          | 1.38E+08        | 3.95E-06                |                    | 0.4354                 |
| rs305261   | 8          | 1.38E+08        | 3.98E-06                |                    | 0.4326                 |
| rs6756828  | 2          | 1.75E+08        | 4.23E-06                | OLA1; SP3          | 0.4083                 |
| rs2587847  | 8          | 1.38E+08        | 4.28E-06                |                    | 0.4059                 |
| rs305290   | 8          | 1.38E+08        | 4.40E-06                |                    | 0.4968                 |
| rs305289   | 8          | 1.38E+08        | 4.49E-06                |                    | 0.4968                 |
| rs2119234  | 8          | 1.38E+08        | 4.53E-06                |                    | 0.3897                 |
| rs305288   | 8          | 1.38E+08        | 4.56E-06                | CCDC81             | 0.6042                 |
| rs587509   | 1          | 99388302        | 4.86E-06                | PAP2D; LPPR4       | 0.3181                 |
| rs7123014  | 11         | 85600090        | 4.95E-06                | C11orf73; EED; M   | 0.6835                 |
| rs305286   | 8          | 1.38E+08        | 5.23E-06                |                    | 0.5629                 |
| rs10130121 | 14         | 35694502        | 5.89E-06                | BRMS1L; GARNL1     | 0.8749                 |
| rs594821   | 18         | 74846577        | 6.07E-06                | SALL3; MBIP        | 0.3304                 |
| rs17461837 | 14         | 35714081        | 6.29E-06                | BRMS1L; GARNL1     | 0.9758                 |
| rs10137274 | 14         | 35714290        | 6.35E-06                | BRMS1L; GARNL1     | 0.9313                 |
| rs305231   | 8          | 1.38E+08        | 7.76E-06                |                    | 0.5527                 |
| rs305237   | 8          | 1.38E+08        | 8.53E-06                | MBIP               | 0.4383                 |
| rs305244   | 8          | 1.38E+08        | 8.97E-06                |                    | 0.54                   |
| rs10139184 | 14         | 35719798        | 9.57E-06                | BRMS1L; GARNL1     | 0.995                  |
| rs305249   | 8          | 1.38E+08        | 9.68E-06                |                    | 0.54                   |
| rs863686   | 1          | 99382741        | 9.73E-06                | PAP2D; LPPR4       | 0.2036                 |

**Study by Van Laer et al. (2010)**

| <i>SNP</i> | <i>Chr</i> | <i>Position</i> | <i>Original p-value</i> | <i>Gene region</i> | <i>Current P-value</i> |
|------------|------------|-----------------|-------------------------|--------------------|------------------------|
| rs457717   | 5          | 75956728        | 3.55E-07                | IQGAP2             | NA                     |
| rs1697845  | 5          | 75958260        | 1.63E-05                | IQGAP2             | 0.391                  |
| rs989414   | 2          | 1.52E+08        | 3.72E-05 /              |                    | 0.2085                 |
| rs9310194  | 3          | 70713297        | 4.96E-05 /              |                    | 0.6326                 |
| rs10514104 | 5          | 76843891        | 5.08E-05 /              |                    | 0.4335                 |
| rs7913244  | 10         | 10224371        | 5.69E-05 /              |                    | NA                     |
| rs2299641  | 11         | 17397566        | 7.90E-05                | ABCC8              | 0.03423                |

NA = SNP not present or failing QC in current GWAS
