# Supplementary material
Source: PubMed Central journal article supplement (PMC4266741)
Supplement: ejhg201456x5.pdf [file ejhg201456x5.pdf]

PC 1

| CHR | BP       | P        | ANNOT    | FDRqvalue |
|-----|----------|----------|----------|-----------|
| 1   | 1.71E+08 | 0.000149 | FMO2     | 1         |
| 8   | 71581982 | 0.000303 | XKR9     | 1         |
| 1   | 64240585 | 0.000435 | ROR1     | 1         |
| 4   | 56214596 | 0.000553 | SRD5A3   | 1         |
| 2   | 1.2E+08  | 0.000609 | C2orf76  | 1         |
| 1   | 1.71E+08 | 0.00062  | FMO3     | 1         |
| 5   | 31193877 | 0.000962 | CDH6     | 1         |
| 2   | 2.02E+08 | 0.001068 | BZW1     | 1         |
| 11  | 3251137  | 0.001072 | MRGPRES  | 1         |
| 10  | 92982238 | 0.001072 | PCGF5    | 1         |
| 8   | 71486568 | 0.001242 | TRAM1    | 1         |
| 14  | 88934651 | 0.001624 | PTPN21   | 1         |
| 6   | 85448103 | 0.001641 | TBX18    | 1         |
| 5   | 54274151 | 0.002073 | ESM1     | 1         |
| 2   | 86830876 | 0.002114 | RNF103   | 1         |
| 22  | 18047058 | 0.002243 | SLC25A18 | 1         |
| 14  | 95885897 | 0.002291 | C14orf49 | 1         |
| 1   | 1.75E+08 | 0.002314 | MRPS14   | 1         |
| 1   | 93545157 | 0.002649 | MTF2     | 1         |
| 5   | 1.27E+08 | 0.002775 | CTXN3    | 1         |
| 1   | 93646433 | 0.002877 | CCDC18   | 1         |
| 16  | 19719946 | 0.002994 | C16orf88 | 1         |
| 8   | 19176047 | 0.003005 | SH2D4A   | 1         |
| 1   | 2.1E+08  | 0.003237 | LAMB3    | 1         |
| 17  | 76214980 | 0.003336 | BIRC5    | 1         |
| 2   | 1.9E+08  | 0.003744 | DIRC1    | 1         |
| 1   | 1.74E+08 | 0.003791 | SERPINC1 | 1         |
| 10  | 97365820 | 0.003901 | ALDH18A1 | 1         |
| 11  | 5323071  | 0.003901 | OR51B4   | 1         |
| 19  | 8376431  | 0.004021 | NDUFA7   | 1         |
| 15  | 40453307 | 0.004087 | BUB1B    | 1         |
| 5   | 34930201 | 0.004179 | DNAJC21  | 1         |
| 3   | 53881471 | 0.004379 | IL17RB   | 1         |
| 6   | 1.11E+08 | 0.004445 | CDC40    | 1         |
| 1   | 1.74E+08 | 0.004598 | RC3H1    | 1         |
| 19  | 57796678 | 0.004599 | ZNF460   | 1         |
| 18  | 67959607 | 0.004656 | SOCS6    | 1         |
| 3   | 1.61E+08 | 0.004896 | C3orf57  | 1         |
| 2   | 86731290 | 0.005017 | VPS24    | 1         |
| 7   | 32997523 | 0.005126 | FKBP9    | 1         |
| 1   | 71318261 | 0.005127 | PTGER3   | 1         |
| 3   | 16357494 | 0.005148 | RFTN1    | 1         |
| 8   | 1.21E+08 | 0.005189 | TAF2     | 1         |
| 2   | 86668822 | 0.005215 | JMJD1A   | 1         |
| 1   | 1.74E+08 | 0.005362 | ZBTB37   | 1         |

|    |          |          |         |   |
|----|----------|----------|---------|---|
| 1  | 2.05E+08 | 0.005368 | NUAK2   | 1 |
| 9  | 1.4E+08  | 0.005552 | WDR85   | 1 |
| 8  | 1.45E+08 | 0.005557 | PUF60   | 1 |
| 22 | 50657112 | 0.005615 | TUBGCP6 | 1 |
| 2  | 65455301 | 0.005618 | ACTR2   | 1 |

PC2

| CHR | BP       | P        | ANNOT    | FDRqvalue |
|-----|----------|----------|----------|-----------|
| 2   | 1.2E+08  | 4.75E-05 | MARCO    | 1         |
| 18  | 2571823  | 0.000147 | NDC80    | 1         |
| 5   | 68666912 | 0.000261 | RAD17    | 1         |
| 8   | 1715122  | 0.000415 | CLN8     | 1         |
| 20  | 62892739 | 0.000542 | PCMTD2   | 1         |
| 2   | 1.83E+08 | 0.000548 | NEUROD1  | 1         |
| 16  | 2047891  | 0.000594 | ZNF598   | 1         |
| 7   | 90032932 | 0.000767 | CLDN12   | 1         |
| 7   | 27282483 | 0.000786 | EVX1     | 1         |
| 16  | 239780   | 0.00084  | LUC7L    | 1         |
| 1   | 1.57E+08 | 0.000844 | C1orf92  | 1         |
| 1   | 14927324 | 0.00088  | KIAA1026 | 1         |
| 1   | 1.57E+08 | 0.000898 | PEAR1    | 1         |
| 8   | 6912844  | 0.00092  | DEFA5    | 1         |
| 3   | 28435094 | 0.000965 | ZCWPW2   | 1         |
| 8   | 94770615 | 0.001004 | TMEM67   | 1         |
| 3   | 1.32E+08 | 0.001043 | UBA5     | 1         |
| 6   | 4995464  | 0.001298 | RPP40    | 1         |
| 1   | 1.57E+08 | 0.001543 | ARHGEF11 | 1         |
| 4   | 1.24E+08 | 0.001582 | IL21     | 1         |
| 17  | 15133406 | 0.001639 | PMP22    | 1         |
| 2   | 1.88E+08 | 0.00175  | CALCRL   | 1         |
| 7   | 32535202 | 0.001864 | KIAA0241 | 1         |
| 1   | 70672605 | 0.001947 | SFRS11   | 1         |
| 7   | 64255206 | 0.001971 | ZNF138   | 1         |
| 1   | 2.47E+08 | 0.002118 | AHCTF1   | 1         |
| 12  | 78226359 | 0.002165 | NAV3     | 1         |
| 7   | 26707657 | 0.002188 | SKAP2    | 1         |
| 8   | 1782495  | 0.00235  | ARHGEF10 | 1         |
| 6   | 52227833 | 0.002381 | PAQR8    | 1         |
| 9   | 1.27E+08 | 0.002405 | NEK6     | 1         |
| 4   | 1.23E+08 | 0.002487 | IL2      | 1         |
| 5   | 1.12E+08 | 0.002562 | REEP5    | 1         |
| 9   | 1.35E+08 | 0.002584 | FLJ46082 | 1         |
| 15  | 68347069 | 0.002717 | PIAS1    | 1         |
| 5   | 68788959 | 0.002771 | OCLN     | 1         |
| 12  | 11805466 | 0.002959 | ETV6     | 1         |
| 17  | 55918660 | 0.002996 | MRPS23   | 1         |
| 3   | 10290839 | 0.003018 | TATDN2   | 1         |

|    |          |          |         |   |
|----|----------|----------|---------|---|
| 15 | 75666081 | 0.003047 | SIN3A   | 1 |
| 5  | 1.49E+08 | 0.00307  | SLC26A2 | 1 |
| 22 | 44891940 | 0.003178 | LDOC1L  | 1 |
| 2  | 1.61E+08 | 0.003267 | ITGB6   | 1 |
| 5  | 65222461 | 0.003449 | ERBB2IP | 1 |
| 2  | 69172923 | 0.003473 | GKN2    | 1 |
| 18 | 63465379 | 0.003558 | CDH7    | 1 |
| 3  | 17199906 | 0.003697 | TBC1D5  | 1 |
| 10 | 74654754 | 0.003939 | OIT3    | 1 |
| 3  | 23961353 | 0.003969 | RPL15   | 1 |
| 7  | 93516077 | 0.004131 | TFPI2   | 1 |

PC3

| CHR | BP       | P        | ANNOT     | FDRqvalue |
|-----|----------|----------|-----------|-----------|
| 8   | 22962348 | 0.000106 | TNFRSF10C | 0.924985  |
| 1   | 2.02E+08 | 0.000182 | TIMM17A   | 0.924985  |
| 19  | 55853497 | 0.000359 | SUV420H2  | 0.924985  |
| 6   | 49695102 | 0.00039  | CRISP3    | 0.924985  |
| 9   | 15553128 | 0.000586 | C9orf93   | 0.924985  |
| 13  | 49823287 | 0.000748 | CDADC1    | 0.924985  |
| 6   | 2768816  | 0.000824 | WRNIP1    | 0.924985  |
| 20  | 43835683 | 0.000942 | SEMG1     | 0.924985  |
| 22  | 26921725 | 0.000992 | TPST2     | 0.924985  |
| 7   | 30693775 | 0.001026 | CRHR2     | 0.924985  |
| 8   | 54138601 | 0.001085 | OPRK1     | 0.924985  |
| 9   | 15464743 | 0.001127 | PSIP1     | 0.924985  |
| 11  | 858424   | 0.001212 | TSPAN4    | 0.924985  |
| 13  | 27131971 | 0.001255 | WASF3     | 0.924985  |
| 3   | 1.85E+08 | 0.001594 | EHHADH    | 0.924985  |
| 19  | 4971725  | 0.001614 | JMJD2B    | 0.924985  |
| 2   | 62427404 | 0.001629 | B3GNT2    | 0.924985  |
| 13  | 36742906 | 0.001668 | SOHLH2    | 0.924985  |
| 4   | 1.54E+08 | 0.001671 | KIAA0922  | 0.924985  |
| 14  | 35222242 | 0.001672 | BAZ1A     | 0.924985  |
| 19  | 53571306 | 0.001886 | ZNF160    | 0.924985  |
| 2   | 2.19E+08 | 0.00194  | GPBAR1    | 0.924985  |
| 18  | 12447303 | 0.002035 | SPIRE1    | 0.924985  |
| 2   | 2.19E+08 | 0.002079 | RUFY4     | 0.924985  |
| 11  | 45117171 | 0.002126 | PRDM11    | 0.924985  |
| 2   | 39209047 | 0.002238 | SOS1      | 0.924985  |
| 6   | 1.32E+08 | 0.002257 | ENPP3     | 0.924985  |
| 2   | 2.32E+08 | 0.002271 | GPR55     | 0.924985  |
| 11  | 64495284 | 0.002304 | RASGRP2   | 0.924985  |
| 8   | 8177604  | 0.00252  | PRAGMIN   | 0.924985  |
| 8   | 1.25E+08 | 0.00252  | ANXA13    | 0.924985  |
| 1   | 2.31E+08 | 0.002643 | CAPN9     | 0.924985  |
| 9   | 1.31E+08 | 0.002801 | ODF2      | 0.924985  |

|    |          |          |          |          |
|----|----------|----------|----------|----------|
| 14 | 50085411 | 0.00282  | RPL36AL  | 0.924985 |
| 16 | 8716036  | 0.002822 | C16orf68 | 0.924985 |
| 4  | 41984118 | 0.002856 | WDR21B   | 0.924985 |
| 13 | 1.01E+08 | 0.002895 | TMTC4    | 0.924985 |
| 9  | 1.33E+08 | 0.002909 | USP20    | 0.924985 |
| 8  | 38646402 | 0.00305  | TACC1    | 0.925652 |
| 9  | 1.33E+08 | 0.003141 | FNBP1    | 0.926053 |
| 2  | 2.19E+08 | 0.003154 | IL8RB    | 0.926109 |
| 1  | 1.52E+08 | 0.00322  | CRNN     | 0.926383 |
| 12 | 3003858  | 0.003361 | TULP3    | 0.927452 |
| 2  | 30945661 | 0.003476 | CAPN13   | 0.928259 |
| 14 | 72402431 | 0.003571 | RGS6     | 0.928888 |
| 11 | 27015690 | 0.003734 | FIBIN    | 0.929895 |
| 9  | 15423548 | 0.00394  | SNAPC3   | 0.931054 |
| 1  | 2.21E+08 | 0.004105 | HLX      | 0.931899 |
| 2  | 2.05E+08 | 0.004177 | CD28     | 0.932245 |
| 1  | 61549616 | 0.004289 | NFIA     | 0.932763 |
