# Supplementary material
Source: PubMed Central journal article supplement (PMC4266741)
Supplement: ejhg201456x6.pdf [file ejhg201456x6.pdf]

| SNP1       |     |           | SNP2       |     |          | LD cases | LD case vs control |           |              |
|------------|-----|-----------|------------|-----|----------|----------|--------------------|-----------|--------------|
| SNP1_ID    | Chr | Bp        | SNP2_ID    | Chr | Bp       | p-value  | p-value            | D'(cases) | D'(controls) |
| rs877674   | 1   | 32242206  | rs6952893  | 7   | 95546753 | 2.80E-08 | 4.17E-11           | 0.3413    | -0.7092      |
| rs1869026  | 2   | 121341281 | rs9395969  | 6   | 54361735 | 5.66E-10 | 3.68E-10           | 0.4457    | -0.6068      |
| rs10916814 | 1   | 20892931  | rs690140   | 9   | 93333075 | 3.33E-08 | 5.27E-10           | 0.3058    | -0.2211      |
| rs3813359  | 6   | 130761957 | rs9924528  | 16  | 17855194 | 1.60E-10 | 6.56E-10           | 0.3819    | -0.4177      |
| rs787274   | 9   | 115550363 | rs11250795 | 10  | 1846654  | 4.30E-12 | 7.26E-10           | 0.4499    | -0.5267      |
| rs12022452 | 1   | 40953300  | rs269427   | 6   | 88742820 | 1.28E-10 | 9.95E-10           | 0.4238    | -0.5941      |
| rs9366664  | 6   | 10892499  | rs1600646  | 8   | 13715911 | 4.14E-08 | 1.06E-09           | 0.3041    | -0.6567      |
| rs4685724  | 3   | 4035443   | rs9682918  | 3   | 1.4E+08  | 5.08E-09 | 1.19E-09           | 0.6417    | -0.616       |
| rs2309322  | 4   | 181240134 | rs1334782  | 6   | 18894894 | 7.63E-10 | 1.25E-09           | 0.4058    | -0.3832      |
| rs1903989  | 10  | 53770239  | rs4767920  | 12  | 1.21E+08 | 1.21E-08 | 1.26E-09           | 0.424     | -0.5402      |
| rs7637404  | 3   | 190981868 | rs12457810 | 18  | 9088650  | 1.35E-11 | 1.28E-09           | 0.552     | -0.4894      |
| rs1402915  | 5   | 62193486  | rs2514750  | 8   | 1.19E+08 | 2.39E-10 | 1.32E-09           | 0.427     | -0.5136      |
| rs4424809  | 13  | 85348247  | rs1547553  | 18  | 77926197 | 1.36E-11 | 1.43E-09           | 0.6588    | -0.5236      |
| rs17164851 | 7   | 130003487 | rs2162234  | 15  | 84382435 | 1.64E-08 | 1.89E-09           | 0.3474    | -0.3295      |
| rs2309322  | 4   | 181240134 | rs6917825  | 6   | 18894236 | 7.63E-10 | 2.05E-09           | 0.4058    | -0.3709      |
| rs10514279 | 5   | 85707469  | rs4869993  | 6   | 1.51E+08 | 2.71E-11 | 2.15E-09           | 0.5093    | -0.527       |
| rs16864714 | 3   | 152643911 | rs197167   | 5   | 1.69E+08 | 3.81E-11 | 2.16E-09           | 0.6105    | -0.4537      |
| rs4667193  | 2   | 188626214 | rs11951611 | 5   | 1.77E+08 | 6.78E-09 | 2.18E-09           | 0.7697    | -0.4906      |
| rs4667193  | 2   | 188626214 | rs11953271 | 5   | 1.77E+08 | 6.78E-09 | 2.18E-09           | 0.7697    | -0.4906      |
| rs2197609  | 13  | 85177888  | rs1547553  | 18  | 77926197 | 1.60E-11 | 2.23E-09           | 0.6808    | -0.5096      |
| rs6889397  | 5   | 62221201  | rs2514750  | 8   | 1.19E+08 | 1.13E-09 | 2.70E-09           | 0.4209    | -0.5234      |
| rs9850111  | 3   | 4015439   | rs9682918  | 3   | 1.4E+08  | 7.14E-09 | 2.71E-09           | 0.6118    | -0.5648      |
| rs1074650  | 3   | 4026680   | rs9682918  | 3   | 1.4E+08  | 4.21E-08 | 2.79E-09           | 0.6019    | -0.5962      |
| rs16864714 | 3   | 152643911 | rs264830   | 5   | 1.69E+08 | 1.29E-10 | 2.79E-09           | 0.6015    | -0.5057      |
| rs2296781  | 9   | 80044056  | rs10513454 | 9   | 1.29E+08 | 6.67E-12 | 3.36E-09           | 0.4669    | -0.4346      |
| rs11960314 | 5   | 170059227 | rs2160166  | 16  | 6328022  | 1.60E-08 | 3.56E-09           | 0.4483    | -0.4709      |
| rs1465618  | 2   | 43553949  | rs2604169  | 15  | 33388030 | 1.31E-08 | 3.79E-09           | 0.4925    | -0.1648      |
| rs4244274  | 10  | 110435038 | rs7155714  | 14  | 35836159 | 1.11E-09 | 3.88E-09           | 0.4225    | -0.4218      |
| rs2749592  | 10  | 38258842  | rs10879642 | 12  | 73981404 | 4.36E-08 | 3.93E-09           | 0.6338    | -0.4868      |
| rs11154574 | 6   | 130704268 | rs9924528  | 16  | 17855194 | 4.92E-10 | 4.07E-09           | 0.3575    | -0.3721      |
| rs4836045  | 5   | 121887537 | rs12449554 | 17  | 26857788 | 5.37E-10 | 4.13E-09           | 0.4043    | -0.5319      |
| rs2749592  | 10  | 38258842  | rs1373221  | 12  | 73977824 | 3.34E-08 | 4.44E-09           | 0.6355    | -0.4798      |
| rs12534545 | 7   | 140195463 | rs11641717 | 16  | 59227754 | 4.99E-09 | 4.55E-09           | 0.5138    | -0.379       |

|            |    |           |            |    |          |          |          |        |         |
|------------|----|-----------|------------|----|----------|----------|----------|--------|---------|
| rs11209454 | 1  | 69889691  | rs9533623  | 13 | 44380753 | 3.18E-09 | 4.69E-09 | 0.3166 | -0.6138 |
| rs7770227  | 6  | 114622214 | rs10230573 | 7  | 80141069 | 6.86E-10 | 4.83E-09 | 0.3368 | -0.5788 |
| rs13068223 | 3  | 156470955 | rs884272   | 11 | 12455682 | 2.30E-08 | 5.06E-09 | 0.5889 | -0.2916 |
| rs1402915  | 5  | 62193486  | rs2514966  | 8  | 1.19E+08 | 1.11E-09 | 5.21E-09 | 0.4156 | -0.5023 |
| rs11588062 | 1  | 46779764  | rs8004687  | 14 | 91661939 | 3.51E-08 | 5.24E-09 | 0.4094 | -0.2082 |
| rs8003722  | 14 | 69318262  | rs162360   | 21 | 44858504 | 1.51E-08 | 5.27E-09 | 0.3845 | -0.3196 |
| rs2063413  | 4  | 4654357   | rs877549   | 22 | 30672420 | 3.75E-10 | 5.37E-09 | 0.5673 | -0.5547 |
| rs2296781  | 9  | 80044056  | rs10819087 | 9  | 1.29E+08 | 1.73E-12 | 5.43E-09 | 0.5813 | -0.4085 |
| rs1402915  | 5  | 62193486  | rs2451125  | 8  | 1.19E+08 | 5.39E-09 | 5.69E-09 | 0.3763 | -0.5347 |
| rs727809   | 5  | 152610222 | rs10751106 | 11 | 83920172 | 5.08E-09 | 5.73E-09 | 0.3715 | -0.4831 |
| rs1465618  | 2  | 43553949  | rs345800   | 15 | 33382657 | 3.14E-08 | 5.83E-09 | 0.4766 | -0.1697 |
| rs12776158 | 10 | 71218094  | rs695567   | 22 | 28889735 | 3.41E-09 | 5.94E-09 | 0.3489 | -0.5649 |
| rs7760869  | 6  | 130633537 | rs9924528  | 16 | 17855194 | 1.65E-09 | 6.06E-09 | 0.3817 | -0.3562 |
| rs7710527  | 5  | 108502493 | rs10278194 | 7  | 42363805 | 1.05E-08 | 6.17E-09 | 0.619  | -0.6138 |
| rs6859725  | 5  | 57355531  | rs12535348 | 7  | 25194753 | 2.12E-08 | 6.44E-09 | 0.3912 | -0.5631 |
| rs2270778  | 3  | 124692689 | rs300238   | 5  | 1.63E+08 | 1.16E-09 | 6.53E-09 | 0.3976 | -0.5029 |
| rs1402915  | 5  | 62193486  | rs10955864 | 8  | 1.19E+08 | 2.59E-09 | 6.63E-09 | 0.3883 | -0.5136 |
| rs1402915  | 5  | 62193486  | rs2514747  | 8  | 1.19E+08 | 2.59E-09 | 6.63E-09 | 0.3883 | -0.5136 |
| rs1402915  | 5  | 62193486  | rs2514948  | 8  | 1.19E+08 | 2.59E-09 | 6.63E-09 | 0.3883 | -0.5136 |
| rs1402915  | 5  | 62193486  | rs2514958  | 8  | 1.19E+08 | 2.59E-09 | 6.63E-09 | 0.3883 | -0.5136 |
| rs1402915  | 5  | 62193486  | rs2514746  | 8  | 1.19E+08 | 2.59E-09 | 6.63E-09 | 0.3883 | -0.5136 |
| rs1402915  | 5  | 62193486  | rs2514942  | 8  | 1.19E+08 | 2.59E-09 | 6.63E-09 | 0.3883 | -0.5136 |
| rs1402915  | 5  | 62193486  | rs10808496 | 8  | 1.19E+08 | 2.59E-09 | 6.63E-09 | 0.3883 | -0.5136 |
| rs1402915  | 5  | 62193486  | rs2451164  | 8  | 1.19E+08 | 2.59E-09 | 6.63E-09 | 0.3883 | -0.5136 |
| rs12179502 | 6  | 130655522 | rs9924528  | 16 | 17855194 | 2.70E-09 | 6.66E-09 | 0.3793 | -0.3626 |
| rs12630241 | 3  | 4021679   | rs9682918  | 3  | 1.4E+08  | 7.14E-09 | 6.68E-09 | 0.6118 | -0.5086 |
| rs12630208 | 3  | 4021456   | rs9682918  | 3  | 1.4E+08  | 7.14E-09 | 6.68E-09 | 0.6118 | -0.5086 |
| rs6919251  | 6  | 130737708 | rs9924528  | 16 | 17855194 | 6.16E-09 | 6.76E-09 | 0.3654 | -0.4062 |
| rs10520861 | 5  | 19441735  | rs9380696  | 6  | 37600774 | 2.23E-08 | 6.79E-09 | 0.3359 | -0.6429 |
| rs17059002 | 6  | 130757127 | rs9924528  | 16 | 17855194 | 7.17E-09 | 7.06E-09 | 0.3455 | -0.4244 |
| rs4301303  | 6  | 40603057  | rs10444487 | 12 | 1.17E+08 | 2.99E-08 | 7.34E-09 | 0.3586 | -0.4861 |
| rs10102392 | 8  | 86467538  | rs11238734 | 10 | 44334916 | 6.35E-09 | 7.39E-09 | 0.5007 | -0.5677 |
| rs2882667  | 5  | 138314106 | rs449303   | 14 | 60605788 | 6.13E-10 | 7.51E-09 | 0.5509 | -0.5564 |
| rs1488564  | 3  | 173453868 | rs2961030  | 7  | 52685663 | 2.03E-12 | 7.85E-09 | 0.381  | -0.3581 |
| rs8003722  | 14 | 69318262  | rs229353   | 21 | 44853859 | 3.96E-09 | 7.86E-09 | 0.431  | -0.257  |

|            |    |           |            |    |          |          |          |        |         |
|------------|----|-----------|------------|----|----------|----------|----------|--------|---------|
| rs4462272  | 10 | 101823543 | rs563748   | 11 | 59766499 | 7.14E-10 | 8.06E-09 | 0.3347 | -0.5605 |
| rs11129844 | 3  | 4021546   | rs9682918  | 3  | 1.4E+08  | 9.73E-09 | 8.30E-09 | 0.6102 | -0.5086 |
| rs4129059  | 1  | 214676121 | rs1499503  | 3  | 65658302 | 7.48E-10 | 8.31E-09 | 0.5059 | -0.5605 |
| rs4700537  | 5  | 62205619  | rs2514750  | 8  | 1.19E+08 | 1.48E-09 | 8.75E-09 | 0.4043 | -0.4927 |
| rs1402901  | 2  | 53687730  | rs2173318  | 3  | 1.11E+08 | 6.58E-09 | 9.02E-09 | 0.3694 | -0.5308 |
| rs6927808  | 6  | 114631425 | rs10230573 | 7  | 80141069 | 1.30E-09 | 9.03E-09 | 0.3346 | -0.5719 |
| rs785132   | 6  | 114634471 | rs10230573 | 7  | 80141069 | 1.30E-09 | 9.03E-09 | 0.3346 | -0.5719 |
| rs1320851  | 2  | 66275308  | rs1258569  | 12 | 1.31E+08 | 4.16E-10 | 9.12E-09 | 0.381  | -0.3181 |
| rs4697263  | 4  | 22068673  | rs2141322  | 11 | 8067451  | 9.59E-09 | 9.13E-09 | 0.3568 | -0.2312 |
| rs11126435 | 2  | 74789700  | rs263655   | 9  | 17009481 | 2.19E-08 | 9.30E-09 | 0.3378 | -0.5262 |
| rs1878935  | 5  | 157962085 | rs4077020  | 6  | 1.49E+08 | 1.76E-08 | 9.49E-09 | 0.3654 | -0.2305 |
| rs2407308  | 8  | 4022811   | rs2036534  | 15 | 78826948 | 1.29E-09 | 1.03E-08 | 0.3745 | -0.1359 |
