# Supplementary material
Source: PubMed Central journal article supplement (PMC4266741)
Supplement: ejhg201456x7.pdf [file ejhg201456x7.pdf]

**PC1 uncorrected**

| Database           | Gene Set                                                           | FDR_95Pct | FDR_75Pct |
|--------------------|--------------------------------------------------------------------|-----------|-----------|
| PANTHER_BIOLOGICAL | Fatty_acid_biosynthesis                                            | 1.00E+00  | 1.64E-01  |
| KEGG               | KEGG_FOCAL_ADHESION                                                | 8.82E-01  | 2.09E-01  |
| PANTHER_MOLECULAR_ | Cell_adhesion_molecule                                             | 9.66E-01  | 2.33E-01  |
| PANTHER_MOLECULAR_ | ATP_synthase                                                       | 1.00E+00  | 2.43E-01  |
| KEGG               | KEGG_OOCYTE_MEIOSIS                                                | 9.93E-01  | 2.50E-01  |
| PANTHER_MOLECULAR_ | Amylase                                                            | 1.00E+00  | 2.52E-01  |
| KEGG               | KEGG_COMPLEMENT_AND_COAGULATION_CASCADES                           | 7.33E-01  | 2.67E-01  |
| PANTHER_MOLECULAR_ | Adenylate_cyclase                                                  | 1.00E+00  | 3.28E-01  |
| PANTHER_MOLECULAR_ | Isomerase                                                          | 7.73E-01  | 3.44E-01  |
| GOTERM             | positive regulation of osteoblast differentiation                  | 8.88E-01  | 3.75E-01  |
| REACTOME           | FORMATION_OF_FIBRIN_CLOT_CLOTTING_CASCADE                          | 1.00E+00  | 3.96E-01  |
| REACTOME           | TRANSMISSION_ACROSS_CHEMICAL_SYNAPSES                              | 9.22E-01  | 3.97E-01  |
| REACTOME           | INHIBITION_OF_INSULIN_SECRETION_BY_ADRENALINE_NORADRENALIN         | 9.31E-01  | 4.06E-01  |
| PANTHER_MOLECULAR_ | Lyase                                                              | 1.00E+00  | 4.07E-01  |
| REACTOME           | ELONGATION_AND_PROCESSING_OF_CAPPED_TRANSCRIPTS                    | 1.00E+00  | 4.12E-01  |
| REACTOME           | CREB_PHOPHORYLATION_THROUGH_THE_ACTIVATION_OF_RAS                  | 9.88E-01  | 4.13E-01  |
| REACTOME           | THROMBOXANE_SIGNALLING_THROUGH_TP_RECEPTOR                         | 9.45E-01  | 4.13E-01  |
| REACTOME           | PLATELET_ACTIVATION                                                | 9.36E-01  | 4.18E-01  |
| REACTOME           | AMINE_COMPOUND_SLC_TRANSPORTERS                                    | 1.00E+00  | 4.19E-01  |
| REACTOME           | SIGNALLING_TO_RAS                                                  | 9.83E-01  | 4.23E-01  |
| PANTHER_MOLECULAR_ | Tyrosine_protein_kinase_receptor                                   | 6.94E-01  | 4.23E-01  |
| REACTOME           | ACTIVATION_OF_NMDA_RECEPTOR_UPON_GLUTAMATE_BINDING_ANI             | 1.00E+00  | 4.24E-01  |
| GOTERM             | very-long-chain fatty acid metabolic process                       | 7.84E-01  | 4.24E-01  |
| GOTERM             | arachidonic acid secretion                                         | 2.72E-02  | 8.86E-01  |
| PANTHER_BIOLOGICAL | MHCI-mediated_immunity                                             | 2.20E-01  | 9.67E-01  |
| GOTERM             | cilium membrane                                                    | 2.41E-01  | 9.46E-01  |
| GOTERM             | neurotransmitter:sodium symporter activity                         | 2.53E-01  | 5.52E-01  |
| Panther            | Adrenaline_and_noradrenaline_biosynthesis                          | 2.59E-01  | 9.64E-01  |
| GOTERM             | morphogenesis of embryonic epithelium                              | 2.88E-01  | 8.92E-01  |
| BIOCARTA           | MONOCYTE_PATHWAY                                                   | 4.82E-01  | 1.00E+00  |
| Panther            | Huntington_disease                                                 | 4.86E-01  | 7.52E-01  |
| Panther            | Formyltetrahydroformate_biosynthesis                               | 4.94E-01  | 7.95E-01  |
| KEGG               | KEGG_SYSTEMIC_LUPUS_ERYTHEMATOSUS                                  | 4.95E-01  | 8.56E-01  |
| PANTHER_MOLECULAR_ | Interferon                                                         | 5.24E-01  | 9.29E-01  |
| PANTHER_BIOLOGICAL | Cell_cycle_control                                                 | 5.25E-01  | 9.89E-01  |
| Panther            | Interleukin_signaling_pathway                                      | 5.30E-01  | 9.26E-01  |
| Panther            | Opioid_proopiomelanocortin_pathway                                 | 5.39E-01  | 1.00E+00  |
| Panther            | Heterotrimeric_G-protein_signaling_pathway-Gi_alpha_and_Gs_alpha_I | 5.54E-01  | 9.12E-01  |
| Panther            | Blood_coagulation                                                  | 5.58E-01  | 9.13E-01  |
| PANTHER_MOLECULAR_ | Translation_elongation_factor                                      | 5.67E-01  | 9.22E-01  |
| Panther            | P53_pathway_feedback_loops_1                                       | 5.68E-01  | 8.96E-01  |
| Panther            | Glycolysis                                                         | 5.69E-01  | 8.52E-01  |
| Panther            | 5HT3_type_receptor_mediated_signaling_pathway                      | 5.79E-01  | 9.36E-01  |
| GOTERM             | peptidyl-tyrosine phosphorylation                                  | 5.89E-01  | 7.22E-01  |

|                    |                                         |          |          |
|--------------------|-----------------------------------------|----------|----------|
| Panther            | Vitamin_D_metabolism_and_pathway        | 6.02E-01 | 9.14E-01 |
| PANTHER_BIOLOGICAL | Steroid_hormone-mediated_signaling      | 6.09E-01 | 9.46E-01 |
| GOTERM             | ER-associated protein catabolic process | 6.10E-01 | 9.49E-01 |
| Panther            | EGF_receptor_signaling_pathway          | 6.21E-01 | 7.37E-01 |

### PC2 uncorrected

| Database           | Gene Set                                                  | FDR_95Pct | FDR_75Pct |
|--------------------|-----------------------------------------------------------|-----------|-----------|
| PANTHER_BIOLOGICAL | Receptor_protein_tyrosine_kinase_signaling_pathway        | 1.00E+00  | 2.88E-01  |
| Ingenuity          | Cell.Cycle.G1.S.Checkpoint.Regulation                     | 9.36E-01  | 3.07E-01  |
| PANTHER_BIOLOGICAL | Cell_communication                                        | 1.00E+00  | 3.11E-01  |
| PANTHER_BIOLOGICAL | Gametogenesis                                             | 2.16E-01  | 3.23E-01  |
| PANTHER_BIOLOGICAL | Endocytosis                                               | 1.00E+00  | 3.25E-01  |
| PANTHER_BIOLOGICAL | Other_metabolism                                          | 2.44E-01  | 3.30E-01  |
| PANTHER_BIOLOGICAL | Protein_folding                                           | 1.00E+00  | 3.51E-01  |
| Ingenuity          | Axonal.Guidance.Signaling                                 | 9.25E-01  | 3.90E-01  |
| Ingenuity          | Hepatic.Cholestasis                                       | 9.82E-01  | 3.94E-01  |
| Ingenuity          | p38.MAPK.Signaling                                        | 1.00E+00  | 4.00E-01  |
| Ingenuity          | Neurotrophin.TRK.Signaling                                | 5.57E-01  | 4.00E-01  |
| Ingenuity          | PDGF.Signaling                                            | 9.42E-01  | 4.11E-01  |
| PANTHER_BIOLOGICAL | Non-vertebrate_process                                    | 1.00E+00  | 4.22E-01  |
| Ingenuity          | G-Protein.Coupled.Receptor.Signaling                      | 8.78E-01  | 4.23E-01  |
| Ingenuity          | Hepatic.Fibrosis.Hepatic.Stellate.Cell.Activation         | 8.85E-01  | 4.26E-01  |
| PANTHER_BIOLOGICAL | Cytokinesis                                               | 1.00E+00  | 4.27E-01  |
| PANTHER_BIOLOGICAL | Protein_targeting_and_localization                        | 1.00E+00  | 4.32E-01  |
| PANTHER_BIOLOGICAL | Granulocyte-mediated_immunity                             | 1.00E+00  | 4.37E-01  |
| Ingenuity          | IL-6.Signaling                                            | 9.25E-01  | 4.37E-01  |
| Ingenuity          | Death.Receptor.Signaling                                  | 8.71E-01  | 4.39E-01  |
| Ingenuity          | LPS.IL-1.Mediated.Inhibition.of.RXR.Function              | 9.09E-01  | 4.39E-01  |
| PANTHER_BIOLOGICAL | Cytokine_and_chemokine_mediated_signaling_pathway         | 1.00E+00  | 4.44E-01  |
| Ingenuity          | BMP.Signaling.pathway                                     | 9.90E-01  | 4.48E-01  |
| Ingenuity          | Toll-like.Receptor.Signaling                              | 8.90E-01  | 4.51E-01  |
| Ingenuity          | Dopamine.Receptor.Signaling                               | 1.00E+00  | 4.59E-01  |
| KEGG               | KEGG_REGULATION_OF_AUTOPHAGY                              | 1.54E-01  | 8.95E-01  |
| PANTHER_MOLECULAR_ | Aspartic_protease                                         | 1.90E-01  | 6.41E-01  |
| GOTERM             | autophagic vacuole assembly                               | 1.99E-01  | 9.26E-01  |
| REACTOME           | TRANSFORMATION_OF_LANOSTEROL_TO_CHOLESTEROL               | 2.11E-01  | 7.09E-01  |
| PANTHER_BIOLOGICAL | Gametogenesis                                             | 2.16E-01  | 3.23E-01  |
| KEGG               | KEGG_STEROID_BIOSYNTHESIS                                 | 2.39E-01  | 8.60E-01  |
| PANTHER_BIOLOGICAL | Other_metabolism                                          | 2.44E-01  | 3.30E-01  |
| GOTERM             | aspartic-type endopeptidase activity                      | 2.57E-01  | 9.51E-01  |
| PANTHER_BIOLOGICAL | mRNA_transcription                                        | 2.85E-01  | 5.42E-01  |
| PANTHER_BIOLOGICAL | Amino_acid_catabolism                                     | 2.92E-01  | 7.89E-01  |
| PANTHER_BIOLOGICAL | T-cell_mediated_immunity                                  | 3.11E-01  | 5.70E-01  |
| PANTHER_BIOLOGICAL | NO_mediated_signal_transduction                           | 3.14E-01  | 4.80E-01  |
| PANTHER_BIOLOGICAL | Signal_transduction                                       | 3.18E-01  | 5.74E-01  |
| GOTERM             | positive regulation of cellular protein metabolic process | 3.22E-01  | 1.00E+00  |

|                    |                                      |          |          |
|--------------------|--------------------------------------|----------|----------|
| PANTHER_BIOLOGICAL | Cell_cycle_control                   | 3.51E-01 | 5.63E-01 |
| REACTOME           | CHOLESTEROL_BIOSYNTHESIS             | 3.79E-01 | 7.02E-01 |
| GOTERM             | T cell differentiation in the thymus | 3.84E-01 | 7.35E-01 |
| PANTHER_BIOLOGICAL | Cholesterol_metabolism               | 4.32E-01 | 6.87E-01 |
| PANTHER_BIOLOGICAL | Gluconeogenesis                      | 4.53E-01 | 7.90E-01 |
| KEGG               | KEGG_PEROXISOME                      | 4.54E-01 | 5.77E-01 |
| KEGG               | KEGG_MTOR_SIGNALING_PATHWAY          | 4.65E-01 | 6.20E-01 |
| KEGG               | KEGG_ALPHA_LINOLENIC_ACID_METABOLISM | 4.73E-01 | 9.07E-01 |
| KEGG               | KEGG_GLYCEROPHOSPHOLIPID_METABOLISM  | 4.73E-01 | 8.91E-01 |
| PANTHER_MOLECULAR_ | Other_cytokine_receptor              | 4.87E-01 | 1.00E+00 |
| KEGG               | KEGG_TYPE_I_DIABETES_MELLITUS        | 4.89E-01 | 8.75E-01 |

### PC3 uncorrected

| Database           | Gene Set                                                    | FDR_95Pct | FDR_75Pct |
|--------------------|-------------------------------------------------------------|-----------|-----------|
| KEGG               | KEGG_TGF_BETA_SIGNALING_PATHWAY                             | 1.00E+00  | 1.46E-02  |
| REACTOME           | SPHINGOLIPID_METABOLISM                                     | 1.00E+00  | 1.51E-01  |
| PANTHER_BIOLOGICAL | Lipid_and_fatty_acid_binding                                | 8.43E-01  | 2.31E-01  |
| PANTHER_BIOLOGICAL | Other_oncogenesis                                           | 6.40E-01  | 2.89E-01  |
| PANTHER_BIOLOGICAL | Angiogenesis                                                | 6.98E-01  | 2.96E-01  |
| PANTHER_BIOLOGICAL | Developmental_processes                                     | 6.91E-01  | 2.97E-01  |
| PANTHER_BIOLOGICAL | Vision                                                      | 8.35E-01  | 3.07E-01  |
| PANTHER_BIOLOGICAL | Other_transport                                             | 9.85E-01  | 3.15E-01  |
| PANTHER_BIOLOGICAL | Lipid_metabolism                                            | 8.60E-01  | 3.28E-01  |
| PANTHER_BIOLOGICAL | Other_receptor_mediated_signaling_pathway                   | 7.82E-01  | 3.38E-01  |
| PANTHER_BIOLOGICAL | Steroid_hormone-mediated_signaling                          | 6.97E-01  | 3.42E-01  |
| PANTHER_BIOLOGICAL | Cell_cycle                                                  | 6.20E-01  | 3.52E-01  |
| PANTHER_BIOLOGICAL | Cell_motility                                               | 6.10E-01  | 3.93E-01  |
| PANTHER_BIOLOGICAL | Blood_clotting                                              | 1.00E+00  | 4.05E-01  |
| REACTOME           | PP2A_MEDIATED_DEPHOSPHORYLATION_OF_KEY_METABOLIC_FACTOR     | 1.00E+00  | 4.63E-01  |
| PANTHER_MOLECULAR_ | Membrane-bound_signaling_molecule                           | 5.99E-01  | 4.74E-01  |
| GOTERM             | synaptosome                                                 | 6.26E-01  | 4.76E-01  |
| GOTERM             | phospholipid efflux                                         | 7.97E-01  | 4.89E-01  |
| PANTHER_BIOLOGICAL | Other_amino_acid_metabolism                                 | 9.84E-01  | 4.94E-01  |
| GOTERM             | protein tyrosine kinase activity                            | 7.94E-01  | 4.96E-01  |
| KEGG               | KEGG_REGULATION_OF_ACTIN_CYTOSKELETON                       | 1.00E+00  | 4.99E-01  |
| PANTHER_MOLECULAR_ | Glutamate_receptor                                          | 6.48E-01  | 4.99E-01  |
| GOTERM             | fatty acid beta-oxidation                                   | 6.53E-01  | 5.00E-01  |
| PANTHER_BIOLOGICAL | DNA_replication                                             | 9.33E-01  | 5.03E-01  |
| GOTERM             | antioxidant activity                                        | 6.56E-01  | 5.11E-01  |
| Panther            | P53_pathway_feedback_loops_1                                | 8.22E-02  | 7.28E-01  |
| BIOCARTA           | 41BB_PATHWAY                                                | 1.07E-01  | 1.00E+00  |
| Panther            | TGF-beta_signaling_pathway                                  | 1.08E-01  | 9.79E-01  |
| GOTERM             | Rac GTPase binding                                          | 1.72E-01  | 8.20E-01  |
| GOTERM             | hydrolase activity, acting on acid anhydrides, in phosphoru | 3.04E-01  | 8.12E-01  |
| GOTERM             | negative regulation of gene expression                      | 3.48E-01  | 8.00E-01  |
| GOTERM             | heme biosynthetic process                                   | 3.52E-01  | 7.95E-01  |

|          |                                      |          |          |
|----------|--------------------------------------|----------|----------|
| BIOCARTA | RNA_PATHWAY                          | 3.52E-01 | 1.00E+00 |
| GOTERM   | determination of left/right symmetry | 3.62E-01 | 8.17E-01 |
| GOTERM   | decidualization                      | 3.71E-01 | 8.25E-01 |
| GOTERM   | protein transport                    | 3.72E-01 | 9.09E-01 |
| GOTERM   | post-embryonic development           | 3.79E-01 | 8.20E-01 |
| BIOCARTA | VIP_PATHWAY                          | 3.79E-01 | 1.00E+00 |
| GOTERM   | cilium axoneme                       | 4.05E-01 | 7.98E-01 |
| GOTERM   | synaptic transmission, cholinergic   | 4.06E-01 | 8.02E-01 |
| GOTERM   | cholesterol catabolic process        | 4.10E-01 | 7.85E-01 |
| GOTERM   | low-density lipoprotein particle     | 4.11E-01 | 8.65E-01 |
| GOTERM   | glucose homeostasis                  | 4.15E-01 | 8.36E-01 |
| GOTERM   | Golgi membrane                       | 4.18E-01 | 8.63E-01 |
| GOTERM   | trophectodermal cell differentiation | 4.21E-01 | 8.56E-01 |
| GOTERM   | blastocyst development               | 4.33E-01 | 9.18E-01 |
| GOTERM   | neuromuscular synaptic transmission  | 4.33E-01 | 7.95E-01 |
| GOTERM   | cholesterol transport                | 4.35E-01 | 8.20E-01 |
| GOTERM   | fatty acid binding                   | 4.40E-01 | 7.67E-01 |
| BIOCARTA | ATM_PATHWAY                          | 4.41E-01 | 1.00E+00 |

**PC1 adjusted for covariates**

| Database           | Gene Set                                                    | FDR_95Pct | FDR_75Pct |
|--------------------|-------------------------------------------------------------|-----------|-----------|
| KEGG               | KEGG_SYSTEMIC_LUPUS_ERYTHEMATOSUS                           | 1         | 0.0721    |
| KEGG               | KEGG_BIOSYNTHESIS_OF_UNSATURATED_FATTY_ACIDS                | 0.9954833 | 0.074     |
| Ingenuity          | RAR.Activation                                              | 1         | 0.0792    |
| Panther            | 5HT2_type_receptor_mediated_signaling_pathway               | 9.45E-01  | 1.63E-01  |
| PANTHER_MOLECULAR_ | Complement_component                                        | 9.99E-01  | 1.73E-01  |
| PANTHER_MOLECULAR_ | Histone                                                     | 1.00E+00  | 1.82E-01  |
| PANTHER_MOLECULAR_ | Cytokine                                                    | 8.77E-01  | 1.86E-01  |
| PANTHER_MOLECULAR_ | Interferon                                                  | 5.96E-01  | 2.21E-01  |
| Panther            | Coenzyme_A_biosynthesis                                     | 9.41E-01  | 2.28E-01  |
| PANTHER_MOLECULAR_ | Non-motor_actin_binding_protein                             | 8.14E-01  | 3.13E-01  |
| KEGG               | KEGG_JAK_STAT_SIGNALING_PATHWAY                             | 1.00E+00  | 3.21E-01  |
| KEGG               | KEGG_CIRCADIAN_RHYTHM_MAMMAL                                | 1.00E+00  | 3.54E-01  |
| KEGG               | KEGG_REGULATION_OF_ACTIN_CYTOSKELETON                       | 1.00E+00  | 3.62E-01  |
| KEGG               | KEGG_FOLATE_BIOSYNTHESIS                                    | 1.00E+00  | 3.82E-01  |
| KEGG               | KEGG_PANCREATIC_CANCER                                      | 1.00E+00  | 3.86E-01  |
| Panther            | Muscarinic_acetylcholine_receptor_1_and_3_signaling_pathway | 7.37E-01  | 3.99E-01  |
| Panther            | Proline_biosynthesis                                        | 9.64E-01  | 4.05E-01  |
| KEGG               | KEGG_GLYCOSAMINOGLYCAN_BIOSYNTHESIS_CHONDROITIN_SULFATE     | 1.00E+00  | 4.05E-01  |
| PANTHER_MOLECULAR_ | Amylase                                                     | 1.00E+00  | 4.36E-01  |
| PANTHER_MOLECULAR_ | Other_transferase                                           | 9.26E-01  | 4.48E-01  |
| PANTHER_MOLECULAR_ | Phosphodiesterase                                           | 1.00E+00  | 4.48E-01  |
| Panther            | Circadian_clock_system                                      | 1.00E+00  | 4.78E-01  |
| KEGG               | KEGG_ARRHYTHMOGENIC_RIGHT_VENTRICULAR_CARDIOMYOPATHY_A      | 1.00E+00  | 4.80E-01  |
| PANTHER_MOLECULAR_ | Other_enzyme_regulator                                      | 9.11E-01  | 4.83E-01  |
| KEGG               | KEGG_ECM_RECEPTOR_INTERACTION                               | 1.00E+00  | 4.88E-01  |

|                    |                                                             |          |          |
|--------------------|-------------------------------------------------------------|----------|----------|
| GOTERM             | positive regulation of insulin secretion                    | 1.29E-01 | 8.24E-01 |
| GOTERM             | calcium-dependent cysteine-type endopeptidase activity      | 2.39E-01 | 8.04E-01 |
| Panther            | Adrenaline_and_noradrenaline_biosynthesis                   | 2.79E-01 | 5.68E-01 |
| PANTHER_MOLECULAR_ | Cysteine_protease                                           | 3.74E-01 | 4.94E-01 |
| PANTHER_MOLECULAR_ | Adenylate_cyclase                                           | 4.53E-01 | 5.10E-01 |
| BIOCARTA           | TCYTOTOXIC_PATHWAY                                          | 5.63E-01 | 1.00E+00 |
| PANTHER_MOLECULAR_ | Interferon                                                  | 5.96E-01 | 2.21E-01 |
| KEGG               | KEGG_ADHERENS_JUNCTION                                      | 6.68E-01 | 5.51E-01 |
| KEGG               | KEGG_NEUROACTIVE_LIGAND_RECEPTOR_INTERACTION                | 7.33E-01 | 5.23E-01 |
| Panther            | Muscarinic_acetylcholine_receptor_1_and_3_signaling_pathway | 7.37E-01 | 3.99E-01 |
| BIOCARTA           | IL17_PATHWAY                                                | 7.99E-01 | 9.74E-01 |
| GOTERM             | positive regulation of interleukin-8 production             | 8.00E-01 | 9.61E-01 |
| GOTERM             | cell recognition                                            | 8.02E-01 | 6.38E-01 |
| GOTERM             | positive regulation of epithelial to mesenchymal transition | 8.04E-01 | 8.32E-01 |
| GOTERM             | actin filament capping                                      | 8.07E-01 | 8.51E-01 |
| GOTERM             | cellular protein metabolic process                          | 8.13E-01 | 9.57E-01 |
| PANTHER_MOLECULAR_ | Non-motor_actin_binding_protein                             | 8.14E-01 | 3.13E-01 |
| Panther            | GABA-B_receptor_II_signaling                                | 8.17E-01 | 9.38E-01 |
| GOTERM             | glutathione transferase activity                            | 8.18E-01 | 8.65E-01 |
| GOTERM             | activation of protein kinase A activity                     | 8.19E-01 | 8.10E-01 |
| BIOCARTA           | SET_PATHWAY                                                 | 8.28E-01 | 1.00E+00 |
| GOTERM             | neural crest cell migration                                 | 8.28E-01 | 7.30E-01 |
| GOTERM             | nucleic acid binding                                        | 8.28E-01 | 8.63E-01 |
| GOTERM             | double-strand break repair via nonhomologous end joining    | 8.32E-01 | 8.68E-01 |
| GOTERM             | tumor necrosis factor receptor binding                      | 8.35E-01 | 7.79E-01 |

#### PC2 adjusted for covariates

| Database  | Gene Set                                                | FDR_95Pct | FDR_75Pct |
|-----------|---------------------------------------------------------|-----------|-----------|
| Panther   | JAK/STAT_signaling_pathway                              | 4.41E-01  | 5.00E-03  |
| REACTOME  | COLLAGEN_MEDIATED_ACTIVATION_CASCADE                    | 1         | 0.0246    |
| Panther   | Axon_guidance_mediated_by_semaphorins                   | 0.8718444 | 0.0486    |
| REACTOME  | PLATELET_ACTIVATION_TRIGGERS                            | 1.00E+00  | 1.02E-01  |
| REACTOME  | CD28_CO_STIMULATION                                     | 9.14E-01  | 1.29E-01  |
| KEGG      | KEGG_RENAL_CELL_CARCINOMA                               | 8.95E-01  | 1.47E-01  |
| Panther   | Huntington_disease                                      | 8.88E-01  | 1.55E-01  |
| KEGG      | KEGG_CHRONIC_MYELOID_LEUKEMIA                           | 8.93E-01  | 1.97E-01  |
| REACTOME  | FORMATION_OF_PLATELET_PLUG                              | 1.00E+00  | 2.09E-01  |
| REACTOME  | PLATELET_ACTIVATION                                     | 1.00E+00  | 2.18E-01  |
| REACTOME  | CD28_DEPENDENT_VAV1_PATHWAY                             | 8.82E-01  | 2.26E-01  |
| KEGG      | KEGG_PANCREATIC_CANCER                                  | 8.61E-01  | 2.45E-01  |
| KEGG      | KEGG_GLYCOSAMINOGLYCAN_BIOSYNTHESIS_CHONDROITIN_SULFATE | 8.84E-01  | 2.52E-01  |
| REACTOME  | EFFECTS_OF_PIP2_HYDROLYSIS                              | 8.97E-01  | 2.58E-01  |
| KEGG      | KEGG_TYPE_II_DIABETES_MELLITUS                          | 8.42E-01  | 2.65E-01  |
| Ingenuity | Cell.Cycle.G1.S.Checkpoint.Regulation                   | 7.41E-01  | 2.68E-01  |
| KEGG      | KEGG_PROGESTERONE_MEDIATED_OOCYTE_MATURATION            | 8.42E-01  | 2.69E-01  |
| REACTOME  | NEF_MEDIATED_DOWNREGULATION_OF_MHC_CLASS_I_COMPLEX_CEL  | 8.94E-01  | 2.70E-01  |
| REACTOME  | G_PROTEIN_BETA_GAMMA_SIGNALLING                         | 8.62E-01  | 2.71E-01  |

|                    |                                                    |          |          |
|--------------------|----------------------------------------------------|----------|----------|
| REACTOME           | CRMPS_IN_SEMA3A_SIGNALING                          | 9.66E-01 | 2.71E-01 |
| REACTOME           | G_BETA_GAMMA_SIGNALLING_THROUGH_PI3KGAMMA          | 9.20E-01 | 2.72E-01 |
| KEGG               | KEGG_CELL_CYCLE                                    | 1.00E+00 | 2.74E-01 |
| REACTOME           | INORGANIC_CATION_ANION_SLC_TRANSPORTERS            | 8.90E-01 | 2.76E-01 |
| REACTOME           | TRANSFORMATION_OF_LANOSTEROL_TO_CHOLESTEROL        | 3.94E-01 | 2.77E-01 |
| REACTOME           | AXON_GUIDANCE                                      | 9.66E-01 | 2.79E-01 |
| Panther            | Purine_metabolism                                  | 2.29E-01 | 7.73E-01 |
| Panther            | Alzheimer_disease-presenilin_pathway               | 3.14E-01 | 8.04E-01 |
| REACTOME           | TRANSFORMATION_OF_LANOSTEROL_TO_CHOLESTEROL        | 3.94E-01 | 2.77E-01 |
| Panther            | JAK/STAT_signaling_pathway                         | 4.41E-01 | 5.00E-03 |
| Panther            | Circadian_clock_system                             | 4.79E-01 | 8.32E-01 |
| BIOCARTA           | ARENRF2_PATHWAY                                    | 5.55E-01 | 6.79E-01 |
| Ingenuity          | Tight.Junction.Signaling                           | 5.66E-01 | 8.13E-01 |
| PANTHER_BIOLOGICAL | Meiosis                                            | 5.69E-01 | 7.83E-01 |
| Ingenuity          | NFKB.Signaling                                     | 5.72E-01 | 7.87E-01 |
| PANTHER_BIOLOGICAL | DNA_recombination                                  | 5.73E-01 | 7.75E-01 |
| PANTHER_BIOLOGICAL | DNA_repair                                         | 5.77E-01 | 7.11E-01 |
| PANTHER_BIOLOGICAL | Non-vertebrate_process                             | 5.78E-01 | 7.88E-01 |
| Ingenuity          | Mitochondrial.Dysfunction                          | 5.78E-01 | 7.57E-01 |
| Ingenuity          | ERK.MAPK.Signaling                                 | 5.83E-01 | 7.88E-01 |
| Ingenuity          | Apoptosis.Signaling                                | 5.83E-01 | 7.67E-01 |
| Ingenuity          | LPS.IL-1.Mediated.Inhibition.of.RXR.Function       | 5.88E-01 | 7.57E-01 |
| Ingenuity          | cAMP-mediated.Signaling                            | 5.91E-01 | 7.68E-01 |
| PANTHER_BIOLOGICAL | MAPKKK_cascade                                     | 5.92E-01 | 7.34E-01 |
| Ingenuity          | IL-10.Signaling                                    | 5.93E-01 | 7.47E-01 |
| Ingenuity          | PTEN.Signaling                                     | 5.94E-01 | 7.26E-01 |
| PANTHER_BIOLOGICAL | Nucleoside,_nucleotide_and_nucleic_acid_metabolism | 5.97E-01 | 7.17E-01 |
| PANTHER_BIOLOGICAL | Intracellular_protein_traffic                      | 6.00E-01 | 9.34E-01 |
| Ingenuity          | Integrin.Signaling                                 | 6.06E-01 | 8.54E-01 |
| BIOCARTA           | RANKL_PATHWAY                                      | 6.07E-01 | 7.92E-01 |
| Ingenuity          | Toll-like.Receptor.Signaling                       | 6.08E-01 | 7.52E-01 |

### PC3 adjusted for covariates

| Database | Gene Set                                                   | FDR_95Pct | FDR_75Pct |
|----------|------------------------------------------------------------|-----------|-----------|
| Panther  | Heme_biosynthesis                                          | 8.49E-01  | 6.20E-02  |
| Panther  | Notch_signaling_pathway                                    | 8.98E-01  | 8.91E-02  |
| REACTOME | REGULATION_OF_INSULIN_SECRETION_BY_GLUCAGON_LIKE_PEPTIDE_: | 9.84E-01  | 1.19E-01  |
| Panther  | Opioid_proopiomelanocortin_pathway                         | 9.66E-01  | 1.65E-01  |
| REACTOME | INHIBITION_OF_INSULIN_SECRETION_BY_ADRENALINE_NORADRENALIN | 9.54E-01  | 1.76E-01  |
| BIOCARTA | ARF_PATHWAY                                                | 8.57E-01  | 2.79E-01  |
| Panther  | p38_MAPK_pathway                                           | 7.62E-01  | 2.87E-01  |
| BIOCARTA | TEL_PATHWAY                                                | 7.24E-01  | 3.02E-01  |
| Panther  | Metabotropic_glutamate_receptor_group_III_pathway          | 8.64E-01  | 3.41E-01  |
| Panther  | P53_pathway_feedback_loops_1                               | 1.00E+00  | 3.86E-01  |
| REACTOME | PP2A_MEDIATED_DEPHOSPHORYLATION_OF_KEY_METABOLIC_FACTOR    | 7.02E-01  | 3.93E-01  |
| REACTOME | G_PROTEIN_ACTIVATION                                       | 9.49E-01  | 4.23E-01  |

|                    |                                                 |          |          |
|--------------------|-------------------------------------------------|----------|----------|
| REACTOME           | TELOMERE_MAINTENANCE                            | 1.00E+00 | 4.72E-01 |
| REACTOME           | P75NTR_SIGNALS_VIA_NFKB                         | 1.00E+00 | 4.82E-01 |
| PANTHER_BIOLOGICAL | Monosaccharide_metabolism                       | 5.72E-01 | 4.98E-01 |
| REACTOME           | NF_KB_IS_ACTIVATED_AND_SIGNALS_SURVIVAL         | 6.69E-01 | 5.15E-01 |
| PANTHER_BIOLOGICAL | Other_amino_acid_metabolism                     | 8.22E-01 | 5.38E-01 |
| PANTHER_BIOLOGICAL | Other_steroid_metabolism                        | 8.35E-01 | 5.43E-01 |
| PANTHER_BIOLOGICAL | Hematopoiesis                                   | 9.68E-01 | 5.44E-01 |
| PANTHER_BIOLOGICAL | Gluconeogenesis                                 | 6.58E-01 | 5.48E-01 |
| PANTHER_BIOLOGICAL | Phagocytosis                                    | 5.09E-01 | 5.52E-01 |
| Panther            | Metabotropic_glutamate_receptor_group_I_pathway | 9.24E-01 | 5.62E-01 |
| PANTHER_BIOLOGICAL | Other_developmental_process                     | 8.66E-01 | 5.68E-01 |
| PANTHER_BIOLOGICAL | Sex_determination                               | 7.56E-01 | 5.71E-01 |
| Panther            | Ionotropic_glutamate_receptor_pathway           | 8.53E-01 | 5.73E-01 |
| Ingenuity          | 14-3-3-mediated.Signaling                       | 1.45E-01 | 1.00E+00 |
| GOTERM             | Rac GTPase binding                              | 1.74E-01 | 9.60E-01 |
| BIOCARTA           | GSK3_PATHWAY                                    | 4.05E-01 | 9.79E-01 |
| PANTHER_BIOLOGICAL | Lipid_fatty_acid_and_steroid_metabolism         | 4.26E-01 | 9.68E-01 |
| PANTHER_BIOLOGICAL | Asymmetric_protein_localization                 | 4.28E-01 | 6.18E-01 |
| BIOCARTA           | AKT_PATHWAY                                     | 4.40E-01 | 1.00E+00 |
| PANTHER_BIOLOGICAL | Tumor_suppressor                                | 4.60E-01 | 7.83E-01 |
| BIOCARTA           | LEPTIN_PATHWAY                                  | 4.80E-01 | 1.00E+00 |
| PANTHER_MOLECULAR_ | Phosphodiesterase                               | 4.93E-01 | 9.63E-01 |
| PANTHER_BIOLOGICAL | Protein_targeting                               | 4.99E-01 | 9.41E-01 |
| PANTHER_BIOLOGICAL | Phagocytosis                                    | 5.09E-01 | 5.52E-01 |
| PANTHER_BIOLOGICAL | Other_receptor_mediated_signaling_pathway       | 5.35E-01 | 8.53E-01 |
| PANTHER_BIOLOGICAL | Cell_cycle                                      | 5.36E-01 | 8.04E-01 |
| PANTHER_BIOLOGICAL | Cell_structure_and_motility                     | 5.49E-01 | 9.39E-01 |
| PANTHER_BIOLOGICAL | Heart_development                               | 5.50E-01 | 9.30E-01 |
| BIOCARTA           | CDMAC_PATHWAY                                   | 5.59E-01 | 1.00E+00 |
| BIOCARTA           | NKT_PATHWAY                                     | 5.61E-01 | 9.48E-01 |
| PANTHER_BIOLOGICAL | Transport                                       | 5.61E-01 | 6.28E-01 |
| BIOCARTA           | CELL2CELL_PATHWAY                               | 5.61E-01 | 1.00E+00 |
| PANTHER_BIOLOGICAL | Monosaccharide_metabolism                       | 5.72E-01 | 4.98E-01 |
| BIOCARTA           | PS1_PATHWAY                                     | 5.73E-01 | 9.96E-01 |
| PANTHER_BIOLOGICAL | Embryogenesis                                   | 5.75E-01 | 9.31E-01 |
| PANTHER_BIOLOGICAL | Sensory_perception                              | 5.76E-01 | 8.80E-01 |
| BIOCARTA           | CD40_PATHWAY                                    | 5.81E-01 | 1.00E+00 |
| BIOCARTA           | COMP_PATHWAY                                    | 5.82E-01 | 9.69E-01 |
