# Supplementary material
Source: PubMed Central journal article supplement (PMC4266741)

**PC1**

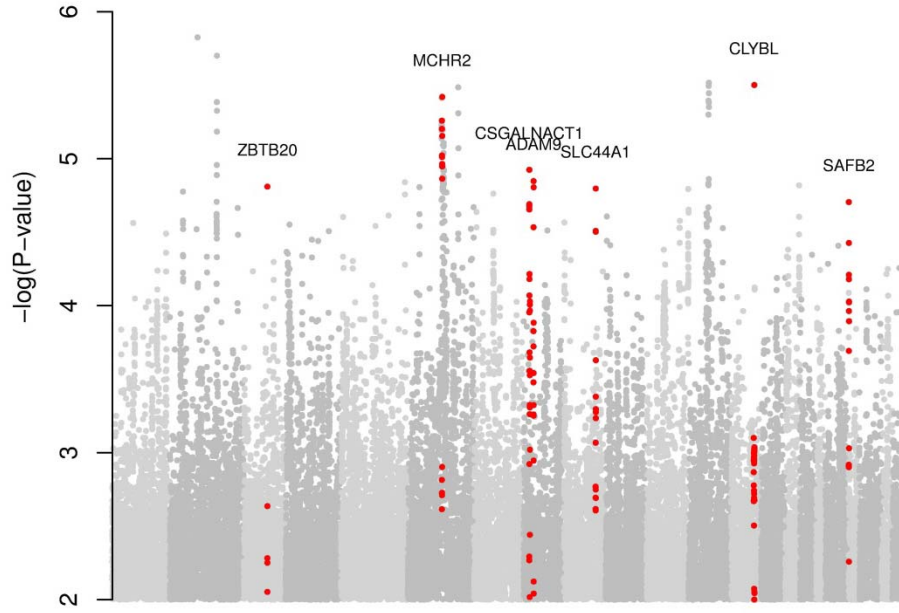

**PC2**

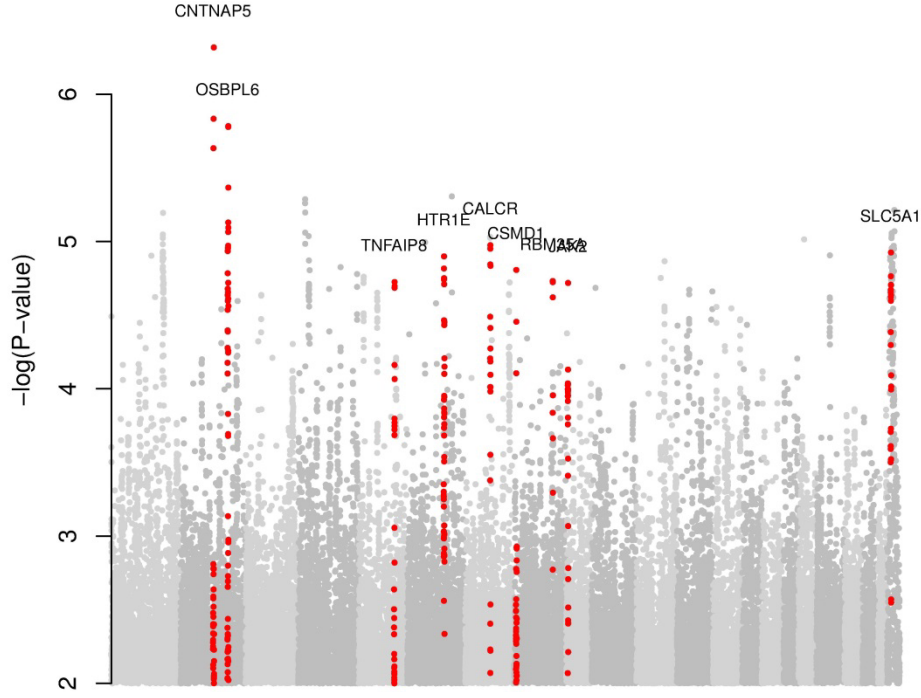

PC3

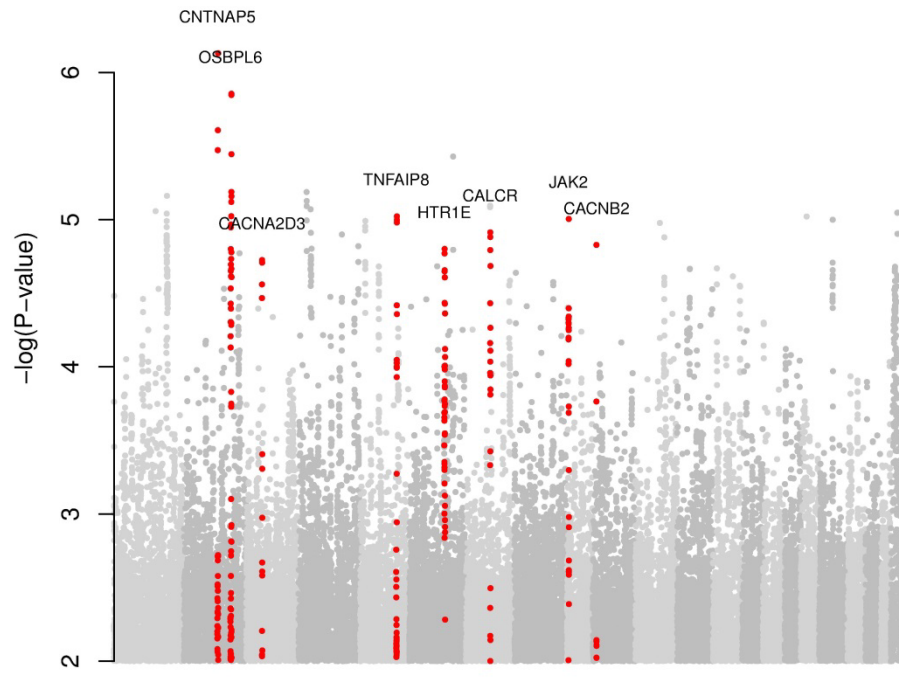

Supplement: ejhg201456x1.pdf [file ejhg201456x1.pdf]
